# Supplementary material for: Profiling of 3D Genome Organization in Nasopharyngeal Cancer Needle Biopsy Patient Samples by a Modified Hi-C Approach
Source: Front Genet. 2021 Sep 3;12:673530. doi: 10.3389/fgene.2021.673530 (PMC8446523; doi:10.3389/fgene.2021.673530)
Supplement: Supplementary file 3 [file Table_2.XLSX]

## Sheet: S009
Supplementary Table S4: TADs called by Arrowhead from Hi-C libraries
#chr	x1	x2
9	19920000	21130000
9	18240000	19030000
9	75810000	77290000
9	32360000	32990000
9	13410000	14430000
9	77840000	78940000
9	2120000	2820000
9	118350000	119430000
9	98010000	99020000
9	103360000	104090000
9	3720000	4350000
9	86970000	88240000
9	93660000	94490000
9	91200000	91900000
9	89010000	89940000
9	92930000	93540000
9	128160000	129000000
9	111610000	112260000
9	98260000	98990000
9	113400000	114070000
9	71030000	71640000
9	74970000	75200000
9	100450000	100630000
9	79080000	79260000
9	91970000	92150000
9	77380000	77580000
9	107690000	107910000
9	127970000	128130000
9	124870000	125100000
9	136640000	136860000
9	117480000	117670000
9	127730000	127910000
9	75470000	75630000
9	74420000	74630000
9	137970000	138310000
9	139380000	139530000
9	132630000	132840000
9	130690000	130870000
9	100820000	101020000
9	129690000	129960000
9	116200000	116420000
9	95420000	95570000
9	134430000	134620000
9	133570000	133750000
9	135890000	136030000
9	97540000	97760000
9	112320000	112580000
9	139990000	140150000
9	111330000	111510000
9	117150000	117410000
9	116830000	117080000
9	123960000	124160000
9	99220000	99400000
9	139680000	139940000
9	109960000	110140000
9	129360000	129560000
9	95900000	96070000
9	126880000	127100000
9	131930000	132080000
9	129060000	129230000
9	72030000	72160000
9	136060000	136210000
9	129980000	130180000
9	134220000	134390000
9	131590000	131710000
10	91550000	92470000
10	33470000	34930000
10	6460000	7540000
10	74110000	74840000
10	98110000	99000000
10	20090000	21080000
10	119230000	120030000
10	44140000	45400000
10	22270000	23360000
10	35900000	37100000
10	15920000	16830000
10	89590000	90310000
10	6700000	7520000
10	3220000	4820000
10	16860000	17590000
10	114220000	115350000
10	30980000	32100000
10	12230000	13150000
10	79800000	81000000
10	49480000	50750000
10	44160000	44880000
10	122690000	123370000
10	11580000	11750000
10	13850000	14130000
10	71010000	71150000
10	28950000	29270000
10	76580000	76770000
10	28520000	28680000
10	13410000	13580000
10	5480000	5670000
10	11820000	12020000
10	7910000	8080000
10	30700000	30860000
10	64370000	64560000
10	105470000	105630000
10	73640000	73800000
10	73140000	73320000
10	134290000	134440000
10	126280000	126430000
10	63650000	63800000
11	31200000	32020000
11	121500000	122400000
11	112160000	113150000
11	15660000	16640000
11	18090000	18790000
11	40320000	41230000
11	132940000	133700000
11	93610000	94230000
11	130870000	131560000
11	110320000	111120000
11	30340000	30950000
11	11060000	11800000
11	128020000	128720000
11	94880000	95500000
11	134170000	134930000
11	119350000	119990000
11	12110000	12280000
11	120000000	120170000
11	44950000	45120000
11	118050000	118230000
11	19980000	20140000
11	68000000	68180000
11	46950000	47170000
11	560000	750000
11	67770000	67970000
11	85750000	85920000
11	61220000	61430000
11	44640000	44930000
11	62180000	62320000
11	47970000	48140000
11	33210000	33350000
11	6550000	6710000
11	63230000	63400000
11	62660000	62800000
11	101740000	101880000
11	65130000	65280000
11	57430000	57590000
11	59290000	59450000
11	35630000	35820000
11	45130000	45330000
11	118240000	118380000
11	46390000	46630000
11	64590000	64870000
11	33840000	34000000
11	63750000	63920000
11	47440000	47610000
11	63580000	63740000
11	65470000	65600000
11	34170000	34370000
11	65630000	65760000
12	82760000	85230000
12	54960000	56070000
12	97370000	98790000
12	78520000	79750000
12	38710000	39680000
12	89930000	91350000
12	28070000	29180000
12	79910000	80660000
12	118830000	120060000
12	29630000	30710000
12	10910000	11660000
12	82020000	82730000
12	13400000	14320000
12	116380000	117340000
12	75090000	75700000
12	42860000	43730000
12	44360000	45330000
12	41650000	42490000
12	88480000	89390000
12	19890000	20600000
12	46500000	47350000
12	65690000	66500000
12	115080000	116250000
12	77450000	78090000
12	99420000	100160000
12	47420000	48040000
12	91760000	92530000
12	103270000	103950000
12	2100000	2760000
12	102490000	103150000
12	67730000	68360000
12	25570000	26180000
12	117640000	118290000
12	116420000	117140000
12	105810000	106550000
12	93890000	94500000
12	124880000	125250000
12	71630000	71830000
12	8010000	8180000
12	58730000	58910000
12	57920000	58130000
12	104570000	104760000
12	5270000	5550000
12	45930000	46120000
12	26250000	26550000
12	64940000	65100000
12	50880000	51040000
12	65280000	65490000
12	44160000	44280000
12	123310000	123450000
12	110000000	110220000
12	98900000	99070000
12	12290000	12460000
12	69770000	69970000
12	1740000	1890000
12	69250000	69480000
12	54620000	54800000
12	32920000	33080000
12	10170000	10320000
12	49450000	49650000
12	130520000	130750000
12	49750000	49910000
12	6710000	6970000
12	76470000	76740000
12	64650000	64790000
12	105610000	105780000
12	53710000	53900000
12	123100000	123240000
12	32210000	32450000
12	54390000	54580000
12	81170000	81350000
12	56160000	56360000
12	109030000	109210000
12	120750000	120930000
12	57400000	57630000
12	24500000	24740000
12	121180000	121420000
12	77010000	77190000
12	4930000	5120000
12	50250000	50450000
12	670000	890000
12	13180000	13360000
12	123850000	124070000
12	132980000	133170000
12	121920000	122110000
12	110890000	111050000
12	57640000	57850000
12	85300000	85430000
12	3190000	3390000
12	111450000	111740000
12	70790000	70950000
12	52540000	52720000
12	56870000	57020000
12	123470000	123680000
12	49210000	49410000
12	96440000	96600000
12	14990000	15150000
12	113470000	113610000
12	121740000	121890000
12	124520000	124800000
12	125260000	125400000
12	62990000	63180000
12	112120000	112270000
12	52980000	53260000
12	113630000	113860000
12	94940000	95140000
12	125050000	125240000
13	76430000	77550000
13	109590000	110800000
13	50510000	51660000
13	96730000	97530000
13	85470000	86390000
13	46080000	46910000
13	47400000	48210000
13	80130000	80930000
13	40510000	41200000
13	73360000	74280000
13	100550000	101190000
13	27940000	28560000
13	30060000	30690000
13	31230000	31380000
13	79980000	80100000
14	31900000	32990000
14	35090000	35910000
14	62630000	63690000
14	100850000	102020000
14	78290000	79230000
14	57920000	58540000
14	105340000	105980000
14	61080000	61720000
14	68370000	69290000
14	92590000	93250000
14	56160000	56940000
14	89630000	90380000
14	76500000	77120000
14	71580000	72210000
14	61940000	62160000
14	93420000	93600000
15	60850000	62120000
15	39000000	40060000
15	44130000	44800000
15	95780000	96880000
15	53070000	54040000
15	37500000	38190000
15	29230000	30360000
15	56770000	57600000
15	76460000	77160000
15	65870000	66590000
15	49730000	50350000
15	27130000	28390000
15	92630000	93270000
15	59980000	60610000
15	83210000	83670000
15	42990000	43210000
15	64510000	64650000
15	37200000	37370000
15	57650000	57810000
15	63070000	63370000
15	99630000	99770000
15	75740000	75960000
15	52600000	52840000
15	60620000	60780000
15	59500000	59780000
15	58170000	58370000
15	90270000	90430000
15	94730000	94870000
15	52240000	52490000
15	67290000	67570000
15	31220000	31420000
15	59810000	59930000
15	25930000	26170000
15	70390000	70780000
15	91230000	91440000
15	70960000	71160000
15	40620000	40860000
15	31630000	31770000
15	66640000	66790000
15	45750000	45910000
15	48010000	48270000
15	92390000	92620000
15	73840000	74000000
15	90850000	91020000
15	94530000	94670000
15	98830000	98970000
15	81560000	81710000
15	86260000	86380000
15	51940000	52060000
15	51510000	51690000
15	63410000	63560000
15	63570000	63710000
15	74920000	75050000
15	99060000	99180000
15	90440000	90630000
15	68840000	68990000
15	80860000	81070000
15	40320000	40460000
16	82270000	83500000
16	75820000	77220000
16	53550000	55450000
16	52080000	53000000
16	34180000	35240000
16	14000000	14770000
16	16870000	17570000
16	27210000	27390000
16	68920000	69140000
16	23220000	23440000
16	19690000	19890000
16	67000000	67190000
16	23790000	24020000
16	57330000	57450000
16	3740000	3930000
16	67280000	67500000
16	15950000	16140000
16	84790000	84970000
16	11050000	11340000
16	4320000	4470000
16	67560000	67690000
16	1880000	2010000
16	57590000	57750000
17	12080000	12910000
17	8280000	9490000
17	67520000	68620000
17	53900000	54810000
17	32090000	32710000
17	63220000	64160000
17	38990000	39830000
17	31350000	32010000
17	73890000	74500000
17	5480000	6330000
17	55200000	55850000
17	38770000	38950000
17	75080000	75230000
17	59500000	59670000
17	60770000	61040000
17	8000000	8200000
17	70550000	70720000
17	47480000	47630000
17	41590000	41850000
17	53600000	53830000
17	27690000	27860000
17	27970000	28100000
17	76010000	76240000
17	27050000	27260000
17	30530000	30690000
17	31100000	31260000
17	1790000	1920000
17	33300000	33440000
17	33940000	34070000
17	46410000	46670000
17	53410000	53590000
17	41170000	41360000
17	28120000	28270000
17	6390000	6540000
17	27280000	27440000
17	7610000	7950000
17	49440000	49630000
17	42970000	43190000
17	19890000	20010000
17	78960000	79190000
17	49060000	49240000
17	6930000	7090000
17	1260000	1410000
17	61490000	61670000
17	56370000	56530000
17	47930000	48090000
17	47640000	47770000
17	72950000	73200000
17	75300000	75500000
17	73260000	73410000
17	74850000	75050000
17	76480000	76700000
17	79220000	79480000
17	26090000	26220000
17	40100000	40290000
17	48230000	48380000
17	64710000	64900000
17	48610000	48800000
17	28430000	28610000
17	74510000	74710000
17	71420000	71640000
17	6740000	6910000
17	42270000	42420000
17	37910000	38110000
17	76250000	76430000
17	38140000	38320000
17	29720000	29870000
17	25780000	25920000
17	37140000	37310000
17	35420000	35580000
17	40980000	41140000
18	70380000	71790000
18	7200000	8500000
18	31630000	32420000
18	22090000	23470000
18	66500000	67770000
18	39620000	41020000
18	58340000	59170000
18	5110000	5840000
18	4090000	5060000
18	19470000	20310000
18	54390000	55220000
18	5870000	6520000
18	20710000	20960000
18	33350000	33540000
18	45360000	45540000
18	43260000	43450000
18	56440000	56740000
18	56190000	56370000
18	60770000	60980000
18	74160000	74340000
18	25560000	25740000
18	34890000	35120000
18	61530000	61660000
18	12970000	13160000
18	57500000	57650000
18	71850000	72000000
18	46000000	46180000
18	21510000	21700000
18	43850000	44080000
18	48340000	48560000
18	46210000	46470000
18	53080000	53250000
18	9350000	9510000
18	42260000	42450000
18	47570000	47730000
1	100230000	101350000
1	68980000	70230000
1	220980000	222640000
1	6760000	7720000
1	118520000	120030000
1	237930000	240150000
1	57270000	58570000
1	76540000	77600000
1	29550000	31180000
1	224680000	225500000
1	55750000	57090000
1	65520000	66190000
1	14290000	15430000
1	11100000	11740000
1	34120000	35200000
1	243500000	244460000
1	63310000	64000000
1	150290000	150970000
1	245260000	246640000
1	221630000	222630000
1	236770000	237770000
1	158140000	159050000
1	159110000	159870000
1	2700000	3330000
1	54480000	55300000
1	60430000	61230000
1	198700000	199520000
1	176850000	177900000
1	87750000	88540000
1	36970000	37900000
1	169880000	170770000
1	59200000	60230000
1	213400000	214330000
1	61480000	62140000
1	38490000	39300000
1	146490000	147390000
1	20210000	20820000
1	228780000	229630000
1	199630000	200480000
1	152600000	153220000
1	232770000	233380000
1	64070000	64710000
1	210620000	211330000
1	168570000	169310000
1	233490000	234220000
1	184030000	184670000
1	200610000	200770000
1	166860000	167020000
1	27410000	27600000
1	202130000	202290000
1	24760000	24930000
1	183680000	183870000
1	182980000	183200000
1	171770000	171950000
1	245000000	245210000
1	33370000	33540000
1	116150000	116320000
1	25200000	25420000
1	2120000	2280000
1	171050000	171270000
1	227960000	228130000
1	214550000	214770000
1	246670000	246850000
1	175110000	175320000
1	36040000	36220000
1	94090000	94290000
1	165090000	165330000
1	174800000	174960000
1	117660000	117820000
1	212250000	212460000
1	16120000	16320000
1	43670000	43860000
1	155290000	155530000
1	47030000	47190000
1	212980000	213160000
1	32670000	32840000
1	44220000	44400000
1	181150000	181400000
1	110320000	110480000
1	182570000	182730000
1	24520000	24710000
1	43380000	43540000
1	180840000	181130000
1	203830000	204090000
1	244780000	244960000
1	25920000	26120000
1	22750000	22950000
1	23020000	23250000
1	206870000	207150000
1	53920000	54160000
1	153780000	153950000
1	26160000	26330000
1	89940000	90080000
1	178270000	178470000
1	220490000	220700000
1	182050000	182370000
1	209730000	209960000
1	41730000	41890000
1	19200000	19430000
1	165360000	165550000
1	9330000	9510000
1	202990000	203190000
1	209380000	209620000
1	208180000	208420000
1	225990000	226170000
1	200840000	201090000
1	28410000	28540000
1	164530000	164760000
1	67720000	67900000
1	65310000	65480000
1	17770000	17940000
1	45290000	45470000
1	236010000	236150000
1	178510000	178720000
1	32270000	32490000
1	15440000	15620000
1	201510000	201780000
1	39350000	39510000
1	219360000	219550000
1	232560000	232760000
1	204120000	204340000
1	27730000	27930000
1	227750000	227900000
1	109810000	109950000
1	201210000	201370000
1	154630000	154860000
1	210350000	210500000
1	202720000	202970000
1	32060000	32240000
1	156030000	156250000
1	219580000	219730000
1	46870000	47010000
1	160390000	160580000
1	29210000	29350000
1	43970000	44170000
1	226810000	227020000
1	203300000	203460000
1	204530000	204760000
1	205300000	205480000
1	160960000	161100000
1	111170000	111320000
1	84940000	85080000
1	33130000	33280000
1	226600000	226780000
1	230200000	230420000
1	167040000	167180000
1	65150000	65280000
20	53280000	54750000
20	22670000	23620000
20	40330000	41920000
20	20820000	21580000
20	42110000	42730000
20	10520000	11520000
20	50860000	51840000
20	21610000	22290000
20	11630000	12240000
20	8010000	8700000
20	24100000	24890000
20	46290000	47240000
20	16770000	17430000
20	59860000	60490000
20	8750000	9370000
20	37260000	37530000
20	19230000	19640000
20	34550000	34730000
20	36670000	36990000
20	52190000	52550000
20	54780000	54940000
20	35240000	35530000
20	19780000	19990000
20	40070000	40320000
20	37540000	37680000
20	46040000	46260000
20	43680000	43920000
20	4570000	4710000
20	1270000	1450000
20	5540000	5760000
20	45110000	45330000
20	35820000	36170000
20	45370000	45790000
20	55930000	56070000
20	12900000	13080000
20	49590000	49930000
20	55660000	55910000
20	43300000	43500000
20	47940000	48140000
20	9380000	9590000
20	320000	480000
20	48220000	48530000
20	17480000	17660000
20	39350000	39560000
20	30400000	30630000
20	20330000	20550000
20	33120000	33350000
20	33860000	34050000
20	32030000	32240000
20	43940000	44080000
20	49210000	49370000
20	1920000	2160000
20	47260000	47520000
20	780000	940000
20	48560000	48740000
20	49970000	50230000
20	32890000	33100000
20	34300000	34510000
20	4730000	4940000
20	44420000	44590000
20	34090000	34280000
20	36680000	36850000
20	45870000	46020000
20	48800000	49080000
20	6560000	6740000
20	2840000	3000000
20	57440000	57610000
20	31080000	31240000
20	62150000	62330000
20	30770000	30930000
19	31160000	32830000
19	30410000	31140000
19	15690000	16300000
19	9720000	9870000
19	42600000	42890000
19	16830000	17160000
19	14300000	14460000
19	55990000	56140000
19	47960000	48200000
19	46550000	46760000
19	15270000	15520000
19	2950000	3190000
19	9980000	10170000
19	33720000	33900000
19	16330000	16520000
19	32880000	33070000
19	41950000	42100000
19	54350000	54530000
19	3290000	3490000
19	18690000	18970000
19	35830000	35990000
19	1680000	1830000
19	39130000	39420000
19	4800000	5030000
19	2460000	2630000
19	13990000	14190000
19	47360000	47500000
19	42930000	43090000
19	10810000	10970000
19	11390000	11590000
19	47790000	47920000
19	57740000	57910000
19	19460000	19600000
19	13850000	13980000
19	45990000	46190000
19	10360000	10510000
19	5770000	5970000
19	3980000	4210000
19	12800000	12980000
19	1010000	1240000
19	42130000	42290000
19	19620000	19760000
19	39640000	39820000
19	58470000	58640000
19	41160000	41320000
19	50190000	50330000
19	6740000	6860000
22	20740000	21380000
22	33670000	34320000
22	34770000	35550000
22	18320000	18510000
22	46530000	46710000
22	42570000	42840000
22	38440000	38740000
22	42140000	42340000
22	39930000	40420000
22	43250000	43500000
22	41310000	41490000
22	22060000	22250000
22	40830000	41040000
22	43000000	43210000
22	30500000	30660000
22	19710000	19910000
22	39550000	39710000
22	26880000	27060000
22	36930000	37150000
22	23490000	23630000
22	29240000	29430000
22	35810000	35990000
22	45650000	45820000
22	19460000	19620000
22	43610000	43780000
22	46740000	46940000
22	37710000	37900000
22	38210000	38360000
22	39730000	39900000
22	38000000	38190000
22	31160000	31320000
22	37170000	37390000
22	19940000	20100000
22	41050000	41200000
22	23320000	23470000
22	29790000	29940000
21	15600000	16960000
21	27110000	28100000
21	41500000	42520000
21	39930000	40590000
21	17900000	18650000
21	42620000	43250000
21	36050000	37400000
21	28220000	29060000
21	45880000	46200000
21	33780000	33930000
21	35830000	36000000
21	37510000	37690000
21	34590000	34820000
21	44000000	44280000
21	30530000	30740000
21	44870000	45060000
21	45540000	45750000
21	39530000	39720000
21	26960000	27100000
21	46700000	46870000
21	43280000	43540000
21	43550000	43710000
21	45210000	45410000
21	46370000	46550000
21	22360000	22510000
21	46220000	46360000
2	18620000	20080000
2	156190000	158080000
2	71750000	73110000
2	204880000	206830000
2	7320000	8870000
2	163180000	163980000
2	29160000	30300000
2	107230000	108430000
2	179610000	180660000
2	150440000	152110000
2	220570000	222840000
2	164020000	165380000
2	15770000	16710000
2	17890000	18560000
2	153670000	154400000
2	226730000	227890000
2	209230000	210110000
2	207550000	208390000
2	222890000	223510000
2	174260000	175220000
2	176190000	176960000
2	11940000	13150000
2	240020000	240900000
2	180980000	181920000
2	178020000	178630000
2	230780000	231500000
2	133980000	134600000
2	88290000	89010000
2	70520000	71200000
2	210220000	210830000
2	109460000	110100000
2	181930000	182580000
2	207650000	208350000
2	135730000	136500000
2	138620000	139570000
2	223830000	224530000
2	98270000	99000000
2	133290000	133930000
2	74040000	74680000
2	161050000	161910000
2	118970000	119610000
2	217540000	218600000
2	27910000	28670000
2	158880000	159620000
2	43040000	43800000
2	27300000	27500000
2	105980000	106140000
2	26810000	26980000
2	105720000	105850000
2	74950000	75100000
2	169000000	169160000
2	225670000	225860000
2	217070000	217260000
2	73210000	73400000
2	231710000	231880000
2	99250000	99450000
2	241150000	241360000
2	68320000	68510000
2	228260000	228430000
2	187380000	187530000
2	128070000	128240000
2	26200000	26340000
2	217380000	217500000
2	86070000	86310000
2	113500000	113710000
2	99020000	99200000
2	152880000	153030000
2	70140000	70290000
2	68990000	69150000
2	97050000	97190000
2	85350000	85510000
2	134860000	135000000
2	160620000	160810000
2	102630000	102850000
2	54740000	54900000
2	201170000	201330000
2	173660000	173820000
2	231530000	231670000
2	219560000	219720000
2	16820000	16940000
2	173890000	174070000
2	219870000	220010000
2	235840000	236010000
2	106350000	106500000
3	105340000	106350000
3	71880000	73060000
3	50440000	51420000
3	115550000	116470000
3	50650000	51410000
3	3240000	4320000
3	121260000	122080000
3	39580000	40220000
3	126380000	127210000
3	24020000	24740000
3	124480000	125300000
3	61540000	62160000
3	62610000	63220000
3	154040000	155050000
3	71920000	72880000
3	16640000	17270000
3	165690000	166750000
3	30120000	30750000
3	192240000	193300000
3	157290000	158250000
3	191120000	192160000
3	134310000	135620000
3	167920000	168570000
3	136810000	137690000
3	179450000	180310000
3	139670000	140600000
3	188970000	189660000
3	142780000	143410000
3	155870000	156220000
3	194160000	194340000
3	193470000	193850000
3	186570000	186880000
3	186300000	186520000
3	51540000	51680000
3	124290000	124430000
3	156920000	157210000
3	167120000	167390000
3	170880000	171280000
3	129390000	129540000
3	52040000	52180000
3	140640000	140830000
3	143490000	143660000
3	149950000	150220000
3	138300000	138640000
3	182840000	183110000
3	167750000	167900000
3	132750000	133120000
3	14300000	14470000
3	179130000	179280000
3	134020000	134200000
3	152750000	152870000
3	196710000	196920000
3	131940000	132120000
3	178850000	179030000
3	184080000	184260000
3	160970000	161140000
3	160430000	160650000
3	25490000	25630000
3	133150000	133310000
3	136470000	136740000
3	153800000	154000000
3	189680000	189910000
3	184270000	184500000
3	181430000	181650000
3	142530000	142720000
3	150630000	150850000
3	171340000	171550000
3	169900000	170100000
3	190950000	191100000
3	149680000	149920000
3	149240000	149440000
3	141020000	141160000
3	185700000	185970000
3	172200000	172330000
3	171750000	172050000
3	183170000	183350000
3	189930000	190140000
3	188690000	188860000
3	186020000	186250000
3	150420000	150580000
3	69210000	69350000
3	176750000	176910000
3	141450000	141610000
3	148830000	148990000
3	155450000	155630000
3	159540000	159730000
3	148670000	148810000
3	193860000	194030000
3	133640000	133880000
3	149060000	149220000
3	52240000	52390000
3	153320000	153490000
3	141840000	141990000
3	156400000	156540000
3	176920000	177070000
3	171570000	171740000
4	17520000	18620000
4	145080000	145990000
4	151190000	151830000
4	12790000	13620000
4	16290000	17470000
4	86000000	86730000
4	36410000	37400000
4	84630000	85420000
4	114280000	115300000
4	9700000	10540000
4	125240000	126180000
4	82310000	83200000
4	157400000	158060000
4	53220000	53860000
4	81270000	81950000
4	70520000	71420000
4	79860000	81170000
4	74140000	75030000
4	103340000	104020000
4	73190000	73900000
4	140580000	141240000
4	75760000	76400000
4	7120000	7750000
4	77080000	77300000
4	78330000	78530000
4	7800000	7990000
5	142090000	143560000
5	121520000	122710000
5	87060000	87990000
5	157500000	158560000
5	56580000	57770000
5	59110000	59950000
5	60240000	61240000
5	96530000	98180000
5	177660000	178930000
5	52410000	53520000
5	60250000	61130000
5	35060000	35950000
5	15080000	16060000
5	37390000	38200000
5	170150000	170790000
5	151190000	151890000
5	131560000	132220000
5	125980000	126620000
5	81620000	82880000
5	66530000	67550000
5	32640000	33420000
5	127540000	128190000
5	5460000	6570000
5	80720000	81530000
5	64090000	64820000
5	16460000	17200000
5	39930000	40730000
5	126880000	127530000
5	137910000	138630000
5	110860000	111480000
5	132430000	133310000
5	67570000	68350000
5	168380000	169000000
5	73190000	73950000
5	55270000	55460000
5	32460000	32610000
5	158570000	158720000
5	157240000	157390000
5	63930000	64050000
5	172390000	172580000
5	169640000	169840000
5	112420000	112640000
5	140250000	140400000
5	111900000	112080000
5	153580000	153750000
5	71410000	71610000
5	167680000	167900000
5	153840000	154010000
5	171900000	172120000
5	179710000	179900000
5	172140000	172360000
5	149010000	149200000
5	112720000	112840000
5	171320000	171480000
5	139160000	139390000
5	10450000	10630000
5	176740000	176920000
5	176530000	176720000
5	149210000	149370000
5	133730000	133910000
5	150370000	150550000
5	175830000	175960000
5	134370000	134530000
6	47740000	49400000
6	112630000	114050000
6	8480000	10440000
6	87750000	89620000
6	124080000	125160000
6	74520000	75930000
6	50770000	51850000
6	18570000	20060000
6	79640000	80420000
6	20550000	21580000
6	150230000	151180000
6	44420000	45890000
6	128150000	128850000
6	37680000	38540000
6	151730000	152640000
6	169330000	170080000
6	16300000	17090000
6	3110000	3760000
6	73110000	73890000
6	133150000	133860000
6	157730000	158510000
6	146280000	147040000
6	82960000	83760000
6	580000	1410000
6	161140000	161790000
6	27130000	27760000
6	121750000	122360000
6	170190000	170840000
6	135840000	136550000
6	105870000	106750000
6	40290000	41030000
6	42860000	43480000
6	11630000	12240000
6	1570000	2240000
6	134460000	135160000
6	157100000	157320000
6	35260000	35410000
6	129920000	130060000
6	136700000	136850000
6	53650000	53820000
6	46810000	46990000
6	155250000	155470000
6	138020000	138180000
6	31630000	31820000
6	152800000	152970000
6	15260000	15440000
6	111350000	111500000
6	158670000	158880000
6	143060000	143260000
6	37000000	37150000
6	33740000	34030000
6	24860000	25050000
6	149080000	149250000
6	166330000	166500000
6	43740000	44040000
6	74210000	74350000
6	30890000	31040000
6	119290000	119410000
6	107990000	108180000
6	163850000	163990000
6	131230000	131400000
6	90130000	90310000
6	137410000	137580000
6	125470000	125620000
6	117750000	117910000
6	149880000	150040000
6	144590000	144770000
6	127610000	127750000
6	4780000	4930000
6	20090000	20240000
6	106890000	107030000
6	138740000	138890000
6	44060000	44220000
6	41380000	41560000
6	33240000	33370000
6	33550000	33670000
7	13320000	14720000
7	83560000	84640000
7	50120000	51430000
7	45920000	47230000
7	11420000	12410000
7	129700000	130460000
7	16720000	17710000
7	2880000	4610000
7	50130000	51240000
7	103050000	104540000
7	147950000	148700000
7	65440000	66460000
7	117960000	118850000
7	40270000	41810000
7	96770000	97480000
7	19740000	20650000
7	79680000	80300000
7	103140000	103810000
7	27220000	28140000
7	71270000	71970000
7	155580000	156630000
7	61960000	62650000
7	31780000	32400000
7	46410000	47150000
7	25250000	25890000
7	16980000	17700000
7	41980000	42900000
7	38810000	39550000
7	90710000	91420000
7	17730000	18380000
7	95690000	96670000
7	7670000	8330000
7	70310000	71190000
7	123800000	124460000
7	37250000	37880000
7	137790000	138430000
7	80320000	81090000
7	1600000	2380000
7	111380000	112100000
7	36490000	37230000
7	139850000	140030000
7	4670000	4820000
7	116280000	116440000
7	72970000	73130000
7	142960000	143100000
7	43610000	43750000
7	140190000	140330000
7	130550000	130720000
7	29220000	29440000
7	44620000	44830000
7	5570000	5760000
7	137580000	137700000
7	30830000	31010000
7	142540000	142690000
7	75790000	75940000
7	128560000	128730000
7	6190000	6350000
7	117370000	117510000
7	73630000	73810000
7	26430000	26610000
7	73280000	73440000
X	106110000	107320000
X	33440000	34310000
X	147120000	148500000
X	14060000	15270000
X	7940000	8720000
X	40400000	41090000
X	132910000	133530000
X	135030000	135910000
X	107970000	108640000
X	130100000	130820000
X	139140000	139780000
X	8800000	9690000
X	1720000	2550000
X	2870000	3730000
X	149110000	149900000
X	128710000	129350000
X	152790000	152930000
X	13520000	13650000
8	121960000	123660000
8	131770000	133180000
8	116080000	117770000
8	108010000	108800000
8	93030000	94650000
8	59620000	60890000
8	20230000	21760000
8	62540000	64020000
8	105790000	106780000
8	23310000	24280000
8	65450000	66480000
8	108870000	109750000
8	79590000	80560000
8	64470000	65290000
8	142470000	143600000
8	126910000	127820000
8	76590000	77200000
8	85530000	86200000
8	58310000	59320000
8	97330000	98570000
8	17860000	18650000
8	42930000	43780000
8	8880000	9690000
8	94690000	95390000
8	71730000	72720000
8	104730000	105470000
8	69470000	70540000
8	53870000	54720000
8	74580000	75250000
8	88700000	89330000
8	57150000	57850000
8	127870000	128740000
8	73200000	73830000
8	46880000	47490000
8	36930000	37610000
8	140700000	141340000
8	49220000	49840000
8	29190000	29910000
8	124830000	125450000
8	139750000	139950000
8	101310000	101540000
8	25980000	26170000
8	103660000	103780000
8	22540000	22760000
8	124470000	124770000
8	101960000	102230000
8	141490000	141650000
8	144180000	144340000
8	53650000	53850000
8	66740000	66940000
8	38670000	38840000
8	48690000	48880000
8	71120000	71310000
8	56770000	56940000
8	10430000	10640000
8	86210000	86350000
8	135700000	135900000
8	8600000	8860000
8	133880000	134200000
8	8100000	8520000
8	42550000	42670000
8	123770000	124020000
8	96070000	96280000
8	81910000	82100000
8	134220000	134460000
8	118870000	119120000
8	30500000	30670000
8	41830000	42000000
8	28990000	29170000
8	73920000	74090000
8	28470000	28610000
8	12730000	12880000
8	102340000	102490000
8	131190000	131380000
8	126450000	126670000
8	27300000	27450000
8	142200000	142370000
8	68740000	68930000
8	21870000	22020000

## Sheet: S010
Supplementary Table S4: TADs called by Arrowhead from Hi-C libraries
#chr	x1	x2
chr1	1030000	1210000
chr1	6300000	6490000
chr1	6550000	6720000
chr1	6760000	7710000
chr1	8070000	8320000
chr1	8620000	8780000
chr1	9330000	9540000
chr1	9640000	10490000
chr1	11080000	11270000
chr1	13990000	14130000
chr1	14290000	15420000
chr1	15640000	15810000
chr1	15850000	16710000
chr1	17800000	17970000
chr1	19200000	19400000
chr1	19660000	19980000
chr1	20270000	20500000
chr1	21280000	21520000
chr1	24510000	24710000
chr1	25020000	25160000
chr1	25230000	25420000
chr1	25920000	26100000
chr1	26170000	26340000
chr1	27730000	27930000
chr1	28170000	28320000
chr1	29210000	29360000
chr1	29550000	31170000
chr1	31430000	31630000
chr1	32270000	32440000
chr1	32670000	32840000
chr1	34100000	35200000
chr1	36060000	36230000
chr1	36550000	36750000
chr1	37000000	37890000
chr1	38520000	39280000
chr1	40270000	40430000
chr1	41730000	41880000
chr1	42030000	42270000
chr1	43360000	43540000
chr1	44220000	44380000
chr1	44850000	45060000
chr1	45290000	45460000
chr1	45510000	45680000
chr1	45810000	45950000
chr1	46490000	46650000
chr1	47900000	48180000
chr1	52090000	52240000
chr1	52590000	52760000
chr1	54290000	54460000
chr1	54520000	55300000
chr1	56880000	57040000
chr1	57290000	58680000
chr1	58990000	59120000
chr1	59200000	60230000
chr1	61430000	62330000
chr1	62670000	62870000
chr1	64070000	64700000
chr1	65300000	65490000
chr1	66450000	66630000
chr1	68000000	68220000
chr1	68580000	68800000
chr1	68980000	70500000
chr1	76580000	77590000
chr1	84890000	85080000
chr1	86830000	86980000
chr1	87740000	88530000
chr1	90090000	90230000
chr1	94090000	94250000
chr1	95350000	95510000
chr1	100240000	101360000
chr1	109800000	109950000
chr1	111140000	111320000
chr1	112050000	112210000
chr1	114350000	114510000
chr1	118070000	118290000
chr1	118580000	120000000
chr1	146960000	147110000
chr1	150020000	150980000
chr1	151500000	151710000
chr1	153760000	153920000
chr1	154600000	154870000
chr1	154890000	155040000
chr1	155300000	155540000
chr1	156050000	156250000
chr1	156420000	156570000
chr1	158130000	159060000
chr1	159740000	159880000
chr1	160380000	160580000
chr1	160960000	161110000
chr1	163370000	165040000
chr1	165360000	165550000
chr1	165720000	165880000
chr1	166870000	167020000
chr1	167520000	167670000
chr1	168410000	168560000
chr1	168570000	169320000
chr1	169890000	170770000
chr1	171760000	171920000
chr1	173190000	173370000
chr1	173470000	173640000
chr1	175120000	175290000
chr1	178010000	178240000
chr1	180230000	180380000
chr1	182570000	182730000
chr1	184040000	184200000
chr1	192770000	192980000
chr1	197610000	197830000
chr1	198460000	198640000
chr1	198710000	199510000
chr1	200260000	200460000
chr1	201220000	201380000
chr1	201490000	201670000
chr1	201800000	201950000
chr1	203000000	203200000
chr1	203300000	203450000
chr1	203470000	203700000
chr1	204130000	204340000
chr1	204380000	204510000
chr1	205320000	205450000
chr1	206880000	207100000
chr1	209740000	209880000
chr1	210620000	211350000
chr1	211690000	211830000
chr1	212240000	212460000
chr1	213400000	214330000
chr1	214550000	214750000
chr1	214830000	215700000
chr1	218450000	219880000
chr1	220150000	220970000
chr1	221430000	221600000
chr1	221630000	222620000
chr1	224330000	224490000
chr1	225710000	225940000
chr1	226600000	226780000
chr1	226810000	227010000
chr1	229390000	229610000
chr1	229770000	230450000
chr1	232560000	232760000
chr1	233490000	234200000
chr1	234270000	234450000
chr1	235960000	236140000
chr1	241670000	241790000
chr1	243490000	244450000
chr1	244480000	244610000
chr1	245270000	246650000
chr1	247520000	247670000
chr2	7320000	7530000
chr2	10200000	10810000
chr2	11030000	11230000
chr2	12860000	13070000
chr2	16790000	16930000
chr2	18570000	20080000
chr2	20640000	20840000
chr2	24460000	24610000
chr2	25190000	25370000
chr2	26180000	26370000
chr2	27920000	28680000
chr2	28820000	28980000
chr2	29210000	29420000
chr2	29470000	30110000
chr2	30940000	31570000
chr2	36570000	36720000
chr2	37380000	38140000
chr2	38570000	38740000
chr2	40020000	42050000
chr2	43480000	43690000
chr2	45850000	46010000
chr2	46260000	46550000
chr2	46690000	46840000
chr2	46880000	47110000
chr2	48010000	48700000
chr2	54730000	54920000
chr2	55240000	55390000
chr2	56370000	57760000
chr2	61310000	61930000
chr2	63920000	64090000
chr2	64310000	64530000
chr2	64560000	64730000
chr2	64860000	65090000
chr2	65850000	68260000
chr2	68930000	69090000
chr2	69230000	69540000
chr2	69780000	69940000
chr2	74670000	74810000
chr2	74930000	75070000
chr2	85320000	85500000
chr2	85550000	86370000
chr2	97000000	97230000
chr2	98330000	98990000
chr2	99020000	99190000
chr2	99950000	100100000
chr2	100150000	100870000
chr2	102490000	102610000
chr2	102620000	102850000
chr2	102860000	103060000
chr2	103080000	103230000
chr2	113510000	113690000
chr2	118790000	118940000
chr2	118970000	119620000
chr2	121880000	122090000
chr2	128070000	128250000
chr2	133260000	133920000
chr2	135730000	136490000
chr2	138630000	139590000
chr2	143840000	144020000
chr2	147790000	148670000
chr2	150440000	152040000
chr2	152660000	152850000
chr2	152880000	153030000
chr2	155270000	156160000
chr2	156200000	158070000
chr2	158180000	158300000
chr2	158890000	159610000
chr2	159780000	159970000
chr2	160150000	160800000
chr2	161090000	161850000
chr2	161920000	162070000
chr2	162830000	162990000
chr2	163030000	163170000
chr2	164000000	165350000
chr2	165580000	165760000
chr2	168980000	169180000
chr2	169270000	169520000
chr2	169800000	169980000
chr2	172420000	173380000
chr2	173660000	173810000
chr2	173890000	174080000
chr2	174230000	175220000
chr2	176180000	176960000
chr2	180970000	181810000
chr2	181910000	182580000
chr2	182600000	182780000
chr2	187370000	187510000
chr2	189380000	190260000
chr2	190310000	190490000
chr2	191230000	191350000
chr2	191680000	191870000
chr2	196370000	196530000
chr2	198060000	198180000
chr2	199170000	200380000
chr2	202100000	202240000
chr2	206630000	206790000
chr2	207630000	208350000
chr2	208620000	208850000
chr2	209310000	210100000
chr2	210260000	210440000
chr2	217090000	217260000
chr2	217540000	218620000
chr2	219550000	219710000
chr2	219860000	220010000
chr2	220590000	222840000
chr2	223200000	223420000
chr2	223590000	223760000
chr2	223830000	224470000
chr2	224920000	225140000
chr2	225700000	225880000
chr2	226730000	227670000
chr2	231490000	231670000
chr2	232100000	232300000
chr2	232470000	232590000
chr2	233460000	234340000
chr2	235040000	235180000
chr2	235200000	235410000
chr2	238100000	238310000
chr2	238480000	238680000
chr2	239950000	240950000
chr2	241160000	241340000
chr3	3240000	4320000
chr3	4350000	5240000
chr3	9130000	9320000
chr3	14330000	14510000
chr3	15460000	15610000
chr3	15660000	15850000
chr3	16630000	17270000
chr3	17300000	17460000
chr3	18590000	18810000
chr3	23080000	23870000
chr3	25700000	25870000
chr3	27520000	27720000
chr3	27750000	28360000
chr3	28710000	30020000
chr3	28870000	29990000
chr3	32060000	32190000
chr3	32560000	32710000
chr3	32770000	32960000
chr3	32990000	33130000
chr3	36000000	36750000
chr3	37090000	37250000
chr3	40230000	40360000
chr3	40540000	42240000
chr3	40590000	41920000
chr3	42980000	43150000
chr3	43200000	43500000
chr3	44350000	44960000
chr3	45070000	45260000
chr3	45550000	45720000
chr3	45970000	46120000
chr3	46710000	47420000
chr3	48750000	48990000
chr3	49570000	49700000
chr3	50410000	50580000
chr3	50670000	51410000
chr3	51530000	51710000
chr3	52040000	52180000
chr3	52230000	52380000
chr3	59560000	59820000
chr3	61540000	62170000
chr3	62600000	63220000
chr3	66970000	68970000
chr3	69170000	69350000
chr3	69730000	69890000
chr3	71030000	71700000
chr3	71750000	71900000
chr3	71920000	72880000
chr3	87310000	88230000
chr3	98720000	99500000
chr3	99560000	99760000
chr3	99780000	99970000
chr3	104310000	105080000
chr3	105400000	105580000
chr3	111480000	111680000
chr3	112800000	113010000
chr3	113180000	113360000
chr3	114920000	115530000
chr3	118970000	119130000
chr3	119230000	119410000
chr3	121250000	122090000
chr3	124280000	124420000
chr3	124470000	124590000
chr3	124710000	124880000
chr3	126360000	127240000
chr3	128350000	128550000
chr3	129190000	129350000
chr3	129370000	129550000
chr3	130460000	130620000
chr3	132450000	133120000
chr3	134030000	134180000
chr3	134310000	135610000
chr3	135790000	135970000
chr3	136820000	137670000
chr3	139130000	140600000
chr3	142760000	143410000
chr3	148830000	149000000
chr3	149230000	149390000
chr3	149690000	149890000
chr3	149940000	150210000
chr3	152740000	153490000
chr3	154040000	155430000
chr3	155470000	155650000
chr3	156250000	156860000
chr3	157290000	158270000
chr3	158400000	158520000
chr3	159580000	159730000
chr3	160450000	160650000
chr3	160980000	161150000
chr3	167760000	167880000
chr3	167920000	168570000
chr3	171750000	172050000
chr3	176680000	178100000
chr3	178850000	179030000
chr3	179540000	180310000
chr3	182890000	183070000
chr3	184090000	184260000
chr3	184300000	184460000
chr3	185790000	185960000
chr3	186010000	186250000
chr3	186610000	186860000
chr3	188680000	188870000
chr3	188970000	189660000
chr3	190200000	190410000
chr3	190950000	191130000
chr3	192230000	193290000
chr3	193860000	194030000
chr3	194370000	194980000
chr3	196720000	196920000
chr4	2740000	2900000
chr4	6710000	6880000
chr4	7790000	7990000
chr4	8230000	8420000
chr4	10550000	11740000
chr4	12810000	13570000
chr4	16490000	17340000
chr4	17640000	18630000
chr4	19290000	20260000
chr4	24470000	25310000
chr4	26840000	27010000
chr4	37590000	37790000
chr4	37800000	38030000
chr4	38920000	39140000
chr4	40150000	40320000
chr4	41670000	41870000
chr4	42250000	42880000
chr4	47430000	47570000
chr4	47680000	47850000
chr4	53060000	53870000
chr4	55170000	55830000
chr4	57490000	57670000
chr4	70560000	70720000
chr4	74570000	74770000
chr4	78000000	78120000
chr4	79870000	81180000
chr4	81270000	81940000
chr4	82300000	83230000
chr4	83440000	83650000
chr4	84000000	84180000
chr4	84410000	84570000
chr4	86700000	86900000
chr4	88270000	88390000
chr4	89440000	89580000
chr4	90150000	90350000
chr4	95330000	95520000
chr4	99050000	99910000
chr4	102090000	102270000
chr4	103360000	103540000
chr4	110950000	111130000
chr4	111240000	111420000
chr4	112990000	113150000
chr4	121060000	122030000
chr4	125250000	126160000
chr4	143050000	143760000
chr4	145080000	145990000
chr4	147170000	147840000
chr4	148620000	148770000
chr4	151180000	151800000
chr4	154060000	154240000
chr4	154330000	154510000
chr4	158140000	158880000
chr4	159630000	159780000
chr4	169630000	169830000
chr4	170520000	170670000
chr4	174200000	174350000
chr4	183990000	184170000
chr4	184390000	184550000
chr5	6600000	6740000
chr5	6750000	7850000
chr5	10250000	10420000
chr5	10440000	10640000
chr5	14100000	14280000
chr5	17210000	18310000
chr5	31580000	31810000
chr5	31830000	32080000
chr5	32690000	33410000
chr5	35770000	35920000
chr5	36230000	36400000
chr5	38960000	39110000
chr5	39130000	39300000
chr5	39940000	40730000
chr5	50190000	51950000
chr5	52750000	53520000
chr5	53810000	54150000
chr5	55310000	55490000
chr5	55540000	56550000
chr5	56590000	57770000
chr5	58320000	58470000
chr5	58490000	58670000
chr5	60330000	60960000
chr5	64090000	64810000
chr5	66530000	67560000
chr5	67580000	67760000
chr5	71420000	71600000
chr5	71650000	71830000
chr5	73180000	73950000
chr5	76160000	76320000
chr5	79380000	79580000
chr5	80710000	81530000
chr5	81600000	82870000
chr5	87040000	87960000
chr5	88000000	89580000
chr5	89690000	89850000
chr5	93850000	94030000
chr5	95060000	95710000
chr5	96560000	98160000
chr5	110860000	111490000
chr5	112160000	112320000
chr5	112670000	112840000
chr5	112970000	114400000
chr5	114420000	114600000
chr5	114970000	115160000
chr5	121820000	122950000
chr5	122990000	125610000
chr5	125710000	125860000
chr5	126180000	126400000
chr5	126890000	127530000
chr5	129230000	130450000
chr5	131650000	132300000
chr5	132440000	133290000
chr5	133720000	133920000
chr5	136660000	136840000
chr5	137910000	138600000
chr5	142120000	143220000
chr5	143580000	145450000
chr5	146040000	146280000
chr5	147020000	147220000
chr5	149010000	149200000
chr5	150800000	151010000
chr5	153560000	153780000
chr5	153840000	154010000
chr5	156570000	156730000
chr5	157230000	157380000
chr5	157430000	158560000
chr5	158730000	159410000
chr5	159620000	159790000
chr5	169650000	169840000
chr5	169860000	170050000
chr5	172130000	172370000
chr5	172400000	172570000
chr5	174950000	175140000
chr5	175840000	176020000
chr5	176520000	176710000
chr5	176760000	176920000
chr5	178320000	178520000
chr6	790000	1420000
chr6	2450000	2630000
chr6	3730000	3930000
chr6	4220000	4990000
chr6	6310000	6510000
chr6	13330000	13550000
chr6	13590000	13770000
chr6	14170000	15480000
chr6	16510000	16760000
chr6	16790000	16960000
chr6	17570000	17810000
chr6	18580000	19880000
chr6	20090000	20270000
chr6	20560000	21580000
chr6	24850000	25010000
chr6	26360000	26530000
chr6	27140000	27750000
chr6	30890000	31030000
chr6	31170000	31340000
chr6	31640000	31800000
chr6	34410000	34570000
chr6	37660000	38550000
chr6	41110000	41280000
chr6	41400000	41560000
chr6	42210000	42510000
chr6	42610000	42840000
chr6	43760000	44040000
chr6	44420000	45900000
chr6	44660000	45290000
chr6	47600000	47750000
chr6	50730000	51700000
chr6	53030000	53240000
chr6	53370000	53550000
chr6	53630000	53830000
chr6	57200000	57350000
chr6	64300000	64500000
chr6	69330000	69510000
chr6	72090000	72220000
chr6	74450000	75930000
chr6	76040000	76230000
chr6	80640000	80810000
chr6	80830000	82890000
chr6	82960000	83760000
chr6	83770000	83920000
chr6	84370000	85000000
chr6	87830000	87990000
chr6	105880000	106760000
chr6	108010000	108200000
chr6	108870000	109120000
chr6	109480000	109690000
chr6	109820000	110750000
chr6	111000000	111210000
chr6	111360000	111520000
chr6	112490000	112650000
chr6	112800000	114270000
chr6	112960000	114260000
chr6	113070000	114240000
chr6	117760000	117900000
chr6	118940000	119110000
chr6	119260000	119430000
chr6	119470000	119660000
chr6	121740000	122500000
chr6	124090000	125140000
chr6	128030000	128870000
chr6	129940000	130070000
chr6	131230000	131400000
chr6	132600000	132800000
chr6	132980000	133120000
chr6	133160000	133870000
chr6	135800000	136560000
chr6	136660000	136870000
chr6	137400000	137640000
chr6	138020000	138190000
chr6	138730000	138880000
chr6	138910000	139090000
chr6	139540000	139670000
chr6	143010000	143260000
chr6	144580000	144770000
chr6	146280000	147050000
chr6	147820000	148470000
chr6	149060000	149270000
chr6	151720000	152610000
chr6	155000000	155160000
chr6	155640000	156860000
chr6	155860000	156850000
chr6	157730000	158500000
chr6	158570000	159570000
chr6	160280000	160530000
chr6	161070000	161820000
chr6	163840000	163990000
chr6	166310000	166510000
chr6	166660000	166820000
chr6	169290000	170040000
chr6	170160000	170900000
chr7	1620000	2260000
chr7	2920000	3200000
chr7	5590000	5750000
chr7	6180000	6370000
chr7	11440000	12420000
chr7	12660000	13300000
chr7	13320000	14600000
chr7	16960000	17690000
chr7	17730000	18380000
chr7	18390000	18590000
chr7	18720000	19700000
chr7	19740000	20680000
chr7	23600000	23740000
chr7	25290000	25420000
chr7	26430000	26690000
chr7	26720000	26880000
chr7	27230000	28140000
chr7	28980000	29140000
chr7	29180000	29450000
chr7	31180000	32430000
chr7	33790000	33930000
chr7	35700000	36390000
chr7	36990000	37220000
chr7	37240000	37880000
chr7	38820000	39550000
chr7	39950000	40070000
chr7	41760000	41970000
chr7	41980000	42890000
chr7	44990000	45160000
chr7	45930000	47230000
chr7	61960000	62690000
chr7	65420000	66470000
chr7	70290000	71190000
chr7	71240000	71980000
chr7	72990000	73150000
chr7	73280000	73440000
chr7	73610000	73810000
chr7	73830000	73970000
chr7	75480000	75650000
chr7	77010000	77230000
chr7	77260000	77400000
chr7	80320000	81090000
chr7	83560000	84650000
chr7	84660000	85480000
chr7	86910000	87060000
chr7	87860000	87980000
chr7	90710000	90890000
chr7	92250000	92460000
chr7	92710000	92860000
chr7	95520000	96680000
chr7	96840000	97460000
chr7	100800000	100940000
chr7	103060000	104490000
chr7	103860000	104480000
chr7	105880000	106090000
chr7	106430000	106570000
chr7	106580000	106790000
chr7	111390000	112090000
chr7	112150000	113080000
chr7	115560000	115740000
chr7	116270000	116450000
chr7	116590000	116770000
chr7	117050000	117800000
chr7	120610000	120750000
chr7	121040000	121180000
chr7	129700000	130480000
chr7	130560000	130730000
chr7	130750000	131030000
chr7	131190000	131370000
chr7	132060000	132250000
chr7	137330000	137550000
chr7	137750000	138470000
chr7	139860000	140030000
chr7	140210000	140350000
chr7	142540000	142700000
chr7	154970000	155110000
chr7	158410000	159120000
chr8	8610000	8790000
chr8	11250000	11410000
chr8	12710000	12870000
chr8	12890000	13520000
chr8	17430000	17560000
chr8	17590000	17740000
chr8	19240000	19610000
chr8	19780000	19980000
chr8	20060000	20220000
chr8	20890000	21110000
chr8	22280000	22420000
chr8	24110000	24250000
chr8	27310000	27460000
chr8	27700000	27870000
chr8	29000000	29170000
chr8	29600000	29870000
chr8	30510000	30640000
chr8	37600000	37800000
chr8	40100000	40860000
chr8	41520000	41700000
chr8	41860000	42000000
chr8	42270000	42520000
chr8	49010000	49840000
chr8	52750000	52920000
chr8	53650000	53850000
chr8	55110000	55320000
chr8	56730000	56910000
chr8	58300000	59610000
chr8	58320000	59320000
chr8	59620000	60850000
chr8	61140000	61300000
chr8	61730000	61940000
chr8	64290000	65310000
chr8	65420000	66480000
chr8	66750000	66940000
chr8	67400000	67520000
chr8	69480000	70540000
chr8	71050000	71310000
chr8	71710000	72580000
chr8	72740000	72900000
chr8	79570000	80530000
chr8	90850000	91000000
chr8	91970000	92110000
chr8	92970000	94480000
chr8	93070000	93830000
chr8	94820000	94970000
chr8	96060000	96260000
chr8	96390000	97210000
chr8	97320000	98200000
chr8	98860000	99050000
chr8	99310000	101130000
chr8	102330000	103210000
chr8	103240000	103850000
chr8	103860000	104060000
chr8	105800000	106790000
chr8	106920000	107550000
chr8	107890000	108550000
chr8	108850000	109740000
chr8	116420000	116670000
chr8	117540000	117740000
chr8	118870000	119120000
chr8	120880000	121100000
chr8	124510000	124690000
chr8	126440000	126670000
chr8	126720000	127800000
chr8	127850000	128700000
chr8	130340000	130530000
chr8	130920000	131110000
chr8	131180000	131420000
chr8	131930000	132870000
chr8	134230000	134460000
chr8	134560000	135700000
chr8	140680000	141420000
chr8	143900000	144090000
chr8	145760000	145940000
chr9	610000	760000
chr9	870000	1030000
chr9	2120000	2830000
chr9	4780000	5010000
chr9	5440000	5590000
chr9	13350000	14400000
chr9	18240000	19020000
chr9	20970000	21120000
chr9	22040000	22230000
chr9	27360000	27540000
chr9	32340000	32980000
chr9	33090000	33210000
chr9	34090000	34250000
chr9	34390000	34610000
chr9	34850000	35560000
chr9	35600000	35740000
chr9	36400000	36540000
chr9	36600000	36760000
chr9	37910000	38080000
chr9	71030000	71640000
chr9	72560000	72740000
chr9	73250000	73870000
chr9	74210000	74380000
chr9	74420000	74590000
chr9	75490000	75670000
chr9	75820000	77260000
chr9	77780000	78940000
chr9	77870000	78480000
chr9	79110000	79270000
chr9	82170000	82320000
chr9	85940000	86150000
chr9	86990000	88250000
chr9	89020000	89940000
chr9	90100000	90270000
chr9	92890000	93630000
chr9	94550000	94710000
chr9	95420000	95560000
chr9	95690000	96340000
chr9	98050000	99000000
chr9	100210000	100360000
chr9	100480000	100640000
chr9	100830000	100980000
chr9	101610000	101750000
chr9	101760000	101910000
chr9	101940000	103080000
chr9	107530000	108200000
chr9	108590000	109940000
chr9	110220000	111340000
chr9	113390000	114070000
chr9	114850000	115110000
chr9	116210000	116370000
chr9	116900000	117060000
chr9	117180000	117420000
chr9	117470000	117660000
chr9	118350000	119430000
chr9	120120000	123120000
chr9	123340000	123950000
chr9	124900000	125100000
chr9	126880000	127100000
chr9	127710000	127910000
chr9	128150000	129550000
chr9	129740000	129960000
chr9	130020000	130190000
chr9	130500000	130680000
chr9	131030000	131790000
chr9	131890000	132370000
chr9	132630000	132830000
chr9	133580000	133740000
chr9	134070000	134210000
chr9	134220000	134370000
chr9	135900000	136040000
chr9	136640000	136840000
chr9	137380000	137560000
chr9	139400000	139540000
chr10	3220000	4810000
chr10	5500000	5660000
chr10	5720000	5920000
chr10	6260000	6440000
chr10	6470000	6660000
chr10	7560000	7730000
chr10	11130000	11340000
chr10	12180000	12950000
chr10	13200000	13350000
chr10	13410000	13600000
chr10	13830000	14130000
chr10	15250000	15420000
chr10	15930000	16800000
chr10	16850000	17630000
chr10	19880000	21130000
chr10	22860000	23010000
chr10	26640000	26850000
chr10	27820000	28000000
chr10	28550000	28670000
chr10	28940000	29600000
chr10	30290000	30500000
chr10	31010000	32100000
chr10	32130000	32310000
chr10	33470000	34930000
chr10	35370000	35510000
chr10	35620000	35860000
chr10	35900000	37080000
chr10	44150000	45370000
chr10	44160000	44830000
chr10	45530000	45670000
chr10	49520000	50760000
chr10	49860000	50740000
chr10	52750000	53980000
chr10	61990000	62190000
chr10	62200000	62410000
chr10	62570000	62730000
chr10	63640000	63790000
chr10	63800000	64000000
chr10	64370000	64570000
chr10	70990000	71150000
chr10	72310000	72520000
chr10	76000000	76860000
chr10	79790000	80980000
chr10	86100000	86290000
chr10	88150000	88300000
chr10	89570000	90320000
chr10	90790000	90960000
chr10	91180000	91320000
chr10	91540000	92610000
chr10	94440000	94620000
chr10	94840000	95070000
chr10	96970000	97130000
chr10	97190000	97360000
chr10	97480000	97600000
chr10	98120000	98790000
chr10	98820000	98990000
chr10	100220000	101070000
chr10	101590000	101800000
chr10	102370000	102580000
chr10	103600000	103770000
chr10	103960000	104120000
chr10	105480000	105620000
chr10	112130000	112290000
chr10	112500000	112660000
chr10	114950000	115140000
chr10	115630000	115860000
chr10	116310000	116510000
chr10	119270000	120010000
chr10	120960000	121190000
chr10	121730000	122580000
chr10	122700000	123380000
chr10	126260000	126430000
chr10	134270000	134440000
chr11	1710000	1850000
chr11	2030000	2170000
chr11	7530000	7710000
chr11	9010000	9150000
chr11	9180000	9440000
chr11	11060000	11800000
chr11	12980000	13180000
chr11	13220000	13390000
chr11	15110000	15240000
chr11	15560000	16640000
chr11	19350000	19540000
chr11	19580000	19760000
chr11	32040000	32210000
chr11	34190000	34370000
chr11	35010000	35210000
chr11	35620000	36290000
chr11	44350000	44530000
chr11	44750000	44930000
chr11	45150000	45350000
chr11	57610000	58270000
chr11	63240000	63390000
chr11	63590000	63750000
chr11	65120000	65260000
chr11	65450000	65600000
chr11	65620000	65780000
chr11	68870000	69480000
chr11	72000000	72140000
chr11	72390000	72540000
chr11	72620000	72860000
chr11	73110000	73360000
chr11	73650000	73830000
chr11	75120000	75270000
chr11	76250000	76410000
chr11	77930000	78130000
chr11	78140000	78280000
chr11	83540000	84240000
chr11	85380000	85550000
chr11	86340000	86520000
chr11	88020000	88250000
chr11	94870000	95490000
chr11	95770000	96100000
chr11	106000000	107110000
chr11	107420000	107600000
chr11	108560000	109770000
chr11	110090000	110240000
chr11	110310000	111120000
chr11	111140000	111300000
chr11	111460000	111630000
chr11	112160000	113160000
chr11	112450000	113110000
chr11	113900000	114120000
chr11	115180000	116140000
chr11	116770000	116970000
chr11	118010000	118230000
chr11	119220000	119340000
chr11	119350000	119990000
chr11	121510000	122400000
chr11	122510000	122650000
chr11	122760000	122900000
chr11	122990000	123130000
chr11	123160000	123360000
chr11	124270000	124450000
chr11	124530000	124690000
chr11	126140000	126320000
chr11	127890000	128020000
chr11	128510000	128690000
chr11	129820000	130000000
chr11	130900000	131550000
chr12	700000	900000
chr12	1750000	1890000
chr12	1910000	2050000
chr12	2120000	2730000
chr12	3210000	3370000
chr12	4200000	4390000
chr12	7820000	7960000
chr12	8810000	9010000
chr12	9900000	10080000
chr12	10910000	11640000
chr12	11690000	12910000
chr12	13420000	14310000
chr12	15000000	15150000
chr12	15450000	15650000
chr12	15750000	15940000
chr12	19890000	20770000
chr12	25370000	25520000
chr12	26850000	26990000
chr12	27600000	27810000
chr12	27880000	29160000
chr12	29220000	29430000
chr12	29640000	30730000
chr12	31890000	32130000
chr12	32220000	32440000
chr12	32600000	32790000
chr12	34250000	34390000
chr12	40550000	40710000
chr12	42540000	42720000
chr12	42970000	43700000
chr12	44350000	45360000
chr12	45910000	46140000
chr12	46540000	46700000
chr12	48090000	48240000
chr12	48400000	48570000
chr12	49220000	49380000
chr12	49500000	49640000
chr12	49750000	49930000
chr12	50890000	51030000
chr12	51200000	51370000
chr12	52530000	53380000
chr12	53710000	53840000
chr12	53920000	54070000
chr12	54410000	54530000
chr12	54640000	54760000
chr12	54990000	56040000
chr12	56160000	56340000
chr12	57190000	57340000
chr12	57660000	57840000
chr12	58730000	59560000
chr12	63010000	63180000
chr12	64930000	65100000
chr12	65210000	66500000
chr12	67830000	68030000
chr12	69290000	69470000
chr12	69770000	69980000
chr12	70260000	70970000
chr12	76770000	76970000
chr12	77010000	77190000
chr12	78490000	79720000
chr12	79790000	80610000
chr12	81830000	82760000
chr12	82020000	82740000
chr12	88520000	89380000
chr12	90090000	90380000
chr12	92170000	93040000
chr12	93170000	93820000
chr12	93890000	94500000
chr12	94940000	95150000
chr12	96450000	96600000
chr12	99410000	100070000
chr12	102480000	103170000
chr12	103300000	103940000
chr12	104600000	104730000
chr12	104760000	105470000
chr12	105800000	106540000
chr12	106620000	106750000
chr12	108680000	108860000
chr12	109030000	109190000
chr12	115090000	116260000
chr12	116430000	116680000
chr12	116710000	116850000
chr12	117450000	117580000
chr12	121730000	121890000
chr12	121910000	122110000
chr12	123110000	123250000
chr12	123490000	123680000
chr12	124530000	124790000
chr12	125050000	125250000
chr13	21860000	22040000
chr13	22200000	22880000
chr13	24600000	24790000
chr13	25790000	25940000
chr13	28400000	28550000
chr13	30390000	30690000
chr13	31190000	31380000
chr13	34140000	34290000
chr13	34440000	35760000
chr13	40630000	41250000
chr13	41920000	42750000
chr13	43530000	44430000
chr13	43660000	44380000
chr13	44460000	45550000
chr13	45940000	46080000
chr13	46710000	46890000
chr13	47120000	47250000
chr13	47400000	48360000
chr13	48920000	49150000
chr13	49170000	49330000
chr13	49860000	50000000
chr13	50260000	50440000
chr13	51160000	51380000
chr13	73360000	74280000
chr13	74310000	75830000
chr13	77230000	77470000
chr13	78710000	79830000
chr13	80190000	81600000
chr13	80250000	80930000
chr13	85470000	86410000
chr13	95100000	95280000
chr13	95860000	96050000
chr13	96260000	96480000
chr13	97660000	98460000
chr13	99090000	99310000
chr13	100280000	101210000
chr13	102190000	102380000
chr13	108840000	109550000
chr13	109590000	110770000
chr13	110910000	111090000
chr13	111730000	111880000
chr13	113310000	113520000
chr14	21170000	21310000
chr14	21660000	21850000
chr14	30010000	30690000
chr14	31420000	31580000
chr14	31630000	31830000
chr14	31930000	32940000
chr14	33040000	34280000
chr14	35030000	35900000
chr14	50780000	51000000
chr14	52270000	52440000
chr14	52760000	52940000
chr14	53880000	54810000
chr14	55020000	55240000
chr14	55690000	55870000
chr14	55900000	56960000
chr14	56160000	56900000
chr14	61080000	61720000
chr14	62400000	62570000
chr14	62640000	63590000
chr14	63840000	64030000
chr14	64300000	64460000
chr14	65670000	65870000
chr14	66910000	67600000
chr14	68280000	69300000
chr14	69400000	69540000
chr14	70320000	70500000
chr14	71280000	71450000
chr14	71610000	71760000
chr14	73760000	73930000
chr14	74170000	74310000
chr14	74560000	74730000
chr14	75370000	75560000
chr14	75590000	75760000
chr14	75780000	75960000
chr14	76480000	77120000
chr14	78320000	79180000
chr14	81370000	81990000
chr14	88470000	88650000
chr14	89490000	90380000
chr14	91410000	91630000
chr14	93410000	93590000
chr14	96750000	96910000
chr14	97560000	99830000
chr14	100200000	100360000
chr14	100430000	100670000
chr14	100850000	102130000
chr14	101270000	102100000
chr14	102240000	102400000
chr14	103190000	103390000
chr14	104010000	104190000
chr14	105210000	105990000
chr15	25970000	26150000
chr15	29390000	30360000
chr15	31060000	31830000
chr15	38830000	38980000
chr15	39000000	39900000
chr15	42270000	42440000
chr15	47560000	48580000
chr15	50440000	50610000
chr15	50950000	51190000
chr15	51930000	52070000
chr15	52620000	52870000
chr15	56760000	57610000
chr15	57630000	57830000
chr15	59460000	59750000
chr15	63430000	63560000
chr15	63750000	63890000
chr15	64480000	64640000
chr15	64700000	64960000
chr15	69000000	69170000
chr15	69760000	70820000
chr15	75750000	75930000
chr15	76480000	77160000
chr15	79330000	79490000
chr15	80150000	80290000
chr15	80920000	81060000
chr15	81760000	82500000
chr15	83210000	83880000
chr15	86400000	88890000
chr15	89190000	89370000
chr15	89440000	89570000
chr15	90290000	90420000
chr15	90430000	90630000
chr15	90680000	90820000
chr15	90850000	91020000
chr15	91240000	91440000
chr15	92390000	92620000
chr15	93560000	94670000
chr15	95800000	96880000
chr15	99010000	99620000
chr15	99640000	99780000
chr16	3770000	3950000
chr16	8590000	9230000
chr16	9310000	10290000
chr16	10610000	10780000
chr16	11040000	11950000
chr16	12230000	12960000
chr16	14000000	14770000
chr16	15990000	16170000
chr16	17310000	17570000
chr16	23800000	24030000
chr16	24520000	25260000
chr16	27200000	27360000
chr16	27550000	28260000
chr16	29870000	30030000
chr16	30960000	31160000
chr16	34170000	35270000
chr16	46960000	48200000
chr16	48400000	48580000
chr16	48700000	49390000
chr16	50040000	50840000
chr16	52180000	52980000
chr16	53570000	55420000
chr16	56580000	56750000
chr16	57590000	57750000
chr16	58370000	58520000
chr16	58540000	58690000
chr16	66990000	67180000
chr16	67550000	67690000
chr16	68400000	68550000
chr16	72140000	74070000
chr16	75280000	75420000
chr16	75820000	77200000
chr16	78130000	80550000
chr16	80620000	80840000
chr16	81430000	81650000
chr16	81770000	81920000
chr16	82280000	83490000
chr16	84290000	84470000
chr16	84780000	84990000
chr16	85450000	85640000
chr16	89380000	89580000
chr16	89740000	89930000
chr17	710000	880000
chr17	1250000	1420000
chr17	1560000	1770000
chr17	1950000	2180000
chr17	4120000	4300000
chr17	5490000	6320000
chr17	7760000	7960000
chr17	8010000	8210000
chr17	13200000	15080000
chr17	21020000	21170000
chr17	21200000	21350000
chr17	25720000	25920000
chr17	27050000	27270000
chr17	27280000	27440000
chr17	27680000	27880000
chr17	29550000	29710000
chr17	29730000	29870000
chr17	31340000	32040000
chr17	33630000	33810000
chr17	33930000	34070000
chr17	34950000	35610000
chr17	36660000	36820000
chr17	37130000	37330000
chr17	38160000	38340000
chr17	38520000	38720000
chr17	39010000	39810000
chr17	40090000	40700000
chr17	41170000	41360000
chr17	42590000	42770000
chr17	46100000	46750000
chr17	48600000	48780000
chr17	53860000	54620000
chr17	54630000	54810000
chr17	56360000	56520000
chr17	56590000	56780000
chr17	57380000	57520000
chr17	59980000	60140000
chr17	60820000	61040000
chr17	61490000	61690000
chr17	63230000	64160000
chr17	64280000	64520000
chr17	67350000	67500000
chr17	67530000	68610000
chr17	68700000	70530000
chr17	70980000	71160000
chr17	71410000	72170000
chr17	73000000	73230000
chr17	73270000	73410000
chr17	73600000	73740000
chr17	74100000	74280000
chr17	74880000	75050000
chr17	75300000	75500000
chr17	75760000	76000000
chr17	76250000	76420000
chr17	76480000	76700000
chr17	76830000	76970000
chr17	79260000	79440000
chr18	320000	510000
chr18	5870000	6490000
chr18	7200000	8430000
chr18	12760000	12920000
chr18	21930000	22050000
chr18	22150000	22320000
chr18	29860000	30050000
chr18	32570000	32730000
chr18	33350000	33500000
chr18	39630000	41000000
chr18	42260000	42470000
chr18	43270000	43430000
chr18	43710000	43850000
chr18	45330000	45540000
chr18	46290000	46480000
chr18	52880000	54270000
chr18	54380000	55220000
chr18	55290000	55500000
chr18	56230000	56430000
chr18	60080000	60240000
chr18	60790000	60980000
chr18	72010000	72150000
chr18	77110000	77970000
chr19	570000	1260000
chr19	2480000	2600000
chr19	2940000	3150000
chr19	3990000	4170000
chr19	6160000	6330000
chr19	7740000	7880000
chr19	9750000	9890000
chr19	10230000	10350000
chr19	10830000	10970000
chr19	11380000	11590000
chr19	11800000	12650000
chr19	13990000	14190000
chr19	16330000	16480000
chr19	17170000	17390000
chr19	18570000	18690000
chr19	19640000	19760000
chr19	30220000	30380000
chr19	31270000	31880000
chr19	33720000	33900000
chr19	34260000	34490000
chr19	34670000	34840000
chr19	36810000	38310000
chr19	38380000	38600000
chr19	38700000	38860000
chr19	41950000	42100000
chr19	42930000	43070000
chr19	44340000	45010000
chr19	45170000	45340000
chr19	46560000	46750000
chr19	47360000	47510000
chr19	49560000	49710000
chr19	49720000	49940000
chr19	57870000	58860000
chr20	330000	470000
chr20	530000	730000
chr20	1970000	2160000
chr20	3850000	4070000
chr20	4730000	4930000
chr20	4950000	5080000
chr20	5580000	5760000
chr20	7990000	8700000
chr20	9170000	9330000
chr20	10430000	11520000
chr20	10530000	11250000
chr20	11560000	12740000
chr20	12930000	13090000
chr20	16780000	17420000
chr20	17660000	17890000
chr20	20620000	20800000
chr20	21230000	21380000
chr20	23020000	23230000
chr20	24120000	24910000
chr20	30390000	30610000
chr20	31090000	31240000
chr20	32050000	32240000
chr20	32490000	32690000
chr20	33870000	34030000
chr20	34570000	34710000
chr20	35870000	36020000
chr20	36680000	36850000
chr20	38500000	39330000
chr20	39400000	39580000
chr20	39770000	39970000
chr20	40350000	41890000
chr20	43750000	43920000
chr20	45140000	45330000
chr20	45880000	46020000
chr20	46290000	47230000
chr20	47950000	48140000
chr20	48230000	48480000
chr20	48800000	49080000
chr20	49420000	49550000
chr20	49990000	50180000
chr20	52180000	52550000
chr20	53290000	54750000
chr20	58140000	58330000
chr20	58410000	60230000
chr20	62140000	62750000
chr21	15860000	16120000
chr21	16230000	16870000
chr21	16970000	17190000
chr21	17490000	17690000
chr21	19060000	19230000
chr21	26780000	26950000
chr21	28210000	29070000
chr21	28330000	29060000
chr21	30540000	30740000
chr21	33770000	33930000
chr21	34570000	34820000
chr21	35820000	36010000
chr21	36260000	36410000
chr21	39110000	39290000
chr21	39860000	40550000
chr21	41160000	42470000
chr21	44050000	44250000
chr21	44880000	45060000
chr21	45230000	45400000
chr21	45550000	45720000
chr21	45950000	46140000
chr22	18940000	19620000
chr22	19750000	19920000
chr22	19940000	20110000
chr22	22100000	22260000
chr22	23090000	23290000
chr22	26910000	27050000
chr22	27070000	28200000
chr22	29250000	29420000
chr22	30500000	30640000
chr22	33500000	35580000
chr22	35810000	36000000
chr22	37190000	37400000
chr22	37710000	37860000
chr22	38000000	38190000
chr22	38210000	38380000
chr22	38410000	39030000
chr22	40440000	40710000
chr22	40900000	41050000
chr22	41330000	41520000
chr22	41780000	41930000
chr22	42060000	42880000
chr22	43230000	43450000
chr22	43620000	43790000
chr22	44360000	45030000
chr22	45660000	45830000
chr22	46530000	46720000
chr22	46940000	47100000
chrX	1730000	2550000
chrX	7960000	8710000
chrX	8800000	9680000
chrX	14060000	15280000
chrX	19750000	19890000
chrX	39570000	40340000
chrX	119630000	119780000
chrX	128710000	129330000
chrX	130950000	131780000
chrX	149110000	149890000
chrX	154120000	155230000
chrY	7130000	7750000

## Sheet: S012
Supplementary Table S4: TADs called by Arrowhead from Hi-C libraries
#chr	x1	x2
9	19900000	21130000
9	108650000	109940000
9	86980000	88240000
9	118350000	119430000
9	32340000	32970000
9	110180000	111560000
9	128150000	129360000
9	113040000	114100000
9	103390000	104090000
9	113400000	114060000
9	89040000	89940000
9	98030000	99000000
9	2130000	2830000
9	93650000	94480000
9	131050000	131770000
9	126240000	126850000
9	124860000	125110000
9	33090000	33240000
9	100180000	100370000
9	125860000	126120000
9	131880000	132380000
9	27070000	27270000
9	92010000	92170000
9	114540000	114830000
9	100480000	100620000
9	123960000	124170000
9	114860000	115120000
9	137970000	138310000
9	107980000	108150000
9	116200000	116420000
9	132390000	132560000
9	136640000	136860000
9	34390000	34600000
9	75470000	75640000
9	600000	800000
9	117160000	117420000
9	117460000	117670000
9	27320000	27550000
9	139380000	139540000
9	138860000	139010000
9	134440000	134620000
9	126870000	127120000
9	132630000	132840000
9	93520000	93640000
9	71650000	71810000
9	129690000	129960000
9	130500000	130680000
9	139970000	140150000
9	130690000	130870000
9	80450000	80640000
9	5440000	5600000
9	107720000	107920000
9	135890000	136030000
9	129980000	130180000
9	133360000	133510000
9	37910000	38060000
9	116840000	117060000
9	139680000	139930000
9	134040000	134200000
9	101740000	101920000
9	95900000	96060000
9	36400000	36560000
9	123510000	123710000
10	77100000	78870000
10	132040000	133670000
10	44140000	45380000
10	91540000	92550000
10	35910000	37070000
10	33560000	34930000
10	7900000	9280000
10	12180000	13140000
10	22260000	23350000
10	49490000	50760000
10	114220000	115330000
10	30970000	32100000
10	3220000	4810000
10	79790000	80990000
10	89580000	90320000
10	119250000	120030000
10	104480000	105120000
10	122680000	123500000
10	44150000	44890000
10	98130000	98760000
10	28940000	29600000
10	97440000	97600000
10	115620000	115870000
10	14540000	14870000
10	54050000	54240000
10	88140000	88340000
10	96960000	97130000
10	71960000	72140000
10	112060000	112320000
10	70980000	71160000
10	30670000	30810000
10	97170000	97370000
10	95110000	95260000
10	126200000	126460000
10	92830000	93010000
10	90790000	90970000
10	11550000	11790000
10	120950000	121230000
10	13830000	14150000
10	103920000	104130000
10	26620000	26860000
10	91000000	91170000
10	5480000	5660000
10	73070000	73360000
10	7560000	7740000
10	61570000	61830000
10	116300000	116540000
10	101600000	101800000
10	81120000	81260000
10	72670000	72970000
10	98810000	98980000
10	28530000	28690000
10	70740000	70880000
10	64360000	64570000
10	124040000	124200000
10	105460000	105630000
10	35370000	35510000
10	23590000	23760000
10	82140000	82300000
10	32110000	32290000
10	76570000	76770000
10	103340000	103540000
10	91180000	91340000
10	13670000	13820000
10	72300000	72520000
10	112500000	112670000
10	126310000	126430000
10	11150000	11330000
11	121510000	122380000
11	15660000	16650000
11	110320000	111130000
11	68860000	69470000
11	93590000	94230000
11	30330000	30960000
11	119340000	119990000
11	18120000	18790000
11	35620000	36290000
11	11040000	11800000
11	128030000	128730000
11	94880000	95490000
11	113880000	114130000
11	19090000	19260000
11	85740000	85930000
11	111170000	111310000
11	36320000	36530000
11	46900000	47160000
11	840000	1030000
11	7540000	7700000
11	124530000	124690000
11	14310000	14460000
11	72570000	72880000
11	2040000	2180000
11	122480000	122670000
11	67770000	67970000
11	85360000	85530000
11	57430000	57580000
11	10470000	10760000
11	61550000	61860000
11	111460000	111650000
11	12690000	12920000
11	11810000	12050000
11	64140000	64460000
11	2930000	3120000
11	61930000	62110000
11	118040000	118230000
11	47940000	48140000
11	2570000	2890000
11	100540000	100730000
11	32050000	32220000
11	12060000	12300000
11	72160000	72380000
11	59300000	59430000
11	12980000	13180000
11	63570000	63740000
11	17760000	18000000
11	44950000	45120000
11	65130000	65290000
11	63950000	64090000
11	63230000	63400000
11	62150000	62330000
11	27370000	27510000
11	82400000	82560000
11	19950000	20140000
11	8700000	8880000
11	33170000	33360000
11	10780000	10950000
11	66460000	66600000
11	19350000	19560000
11	34190000	34380000
11	65810000	66010000
11	65460000	65620000
11	35010000	35210000
11	65630000	65770000
11	33860000	34000000
11	63770000	63920000
11	45140000	45330000
11	540000	800000
11	9630000	9770000
11	75890000	76040000
11	68000000	68180000
11	76250000	76410000
11	67150000	67270000
11	19790000	19910000
12	82840000	85230000
12	54960000	56090000
12	44370000	45340000
12	128730000	130440000
12	78520000	79760000
12	89920000	91340000
12	97380000	98790000
12	10930000	11660000
12	13390000	14300000
12	58690000	59570000
12	29640000	30630000
12	88490000	89390000
12	48290000	49060000
12	41660000	42430000
12	115080000	116270000
12	70260000	70970000
12	102520000	103170000
12	47420000	48060000
12	103290000	103950000
12	2110000	2760000
12	117650000	118290000
12	25580000	26190000
12	67730000	68370000
12	105810000	106540000
12	93890000	94500000
12	27570000	27820000
12	56120000	56370000
12	8000000	8160000
12	110520000	110870000
12	54400000	54590000
12	68730000	69050000
12	41010000	41310000
12	31560000	31780000
12	72430000	72670000
12	124820000	125260000
12	108120000	108290000
12	68410000	68700000
12	12240000	12490000
12	32600000	32830000
12	111380000	111740000
12	27160000	27470000
12	118600000	118820000
12	109920000	110220000
12	25370000	25550000
12	130560000	130830000
12	123080000	123260000
12	123750000	124090000
12	50870000	51070000
12	95960000	96220000
12	31880000	32140000
12	64910000	65150000
12	12510000	12780000
12	25130000	25300000
12	119550000	119860000
12	51450000	51730000
12	109010000	109210000
12	98860000	99070000
12	46510000	46760000
12	92540000	92970000
12	116430000	116700000
12	27880000	28090000
12	96610000	96840000
12	9900000	10100000
12	57150000	57380000
12	106600000	106760000
12	13150000	13380000
12	1730000	1890000
12	49730000	49920000
12	132970000	133180000
12	26250000	26560000
12	42510000	42730000
12	69750000	69980000
12	45940000	46100000
12	14940000	15150000
12	32910000	33080000
12	8810000	9010000
12	123280000	123450000
12	34230000	34400000
12	11790000	11990000
12	69250000	69480000
12	116710000	117040000
12	77000000	77190000
12	48100000	48240000
12	530000	660000
12	51200000	51410000
12	40530000	40710000
12	53920000	54070000
12	54610000	54780000
12	72010000	72150000
12	1900000	2080000
12	5260000	5500000
12	52530000	52740000
12	3190000	3400000
12	57650000	57840000
12	112670000	112830000
12	52970000	53260000
12	4180000	4390000
12	680000	920000
12	62990000	63180000
12	124520000	124780000
12	104560000	104750000
12	6690000	6960000
12	49240000	49400000
12	51440000	51630000
12	113620000	113820000
12	96450000	96600000
12	123470000	123720000
12	53710000	53890000
12	14390000	14510000
12	121910000	122110000
12	52750000	52930000
12	94960000	95150000
12	122850000	123000000
12	57400000	57580000
13	47400000	48340000
13	85450000	86420000
13	78710000	79840000
13	41900000	42710000
13	109590000	110800000
13	111080000	111930000
13	73350000	74290000
13	50530000	51520000
13	100280000	101190000
13	108940000	109550000
13	22220000	22860000
13	27940000	28570000
13	40620000	41250000
13	98780000	99050000
13	30090000	30290000
13	24580000	24800000
13	48670000	48850000
13	20790000	21000000
13	113280000	113530000
13	50220000	50410000
13	110850000	111070000
13	95820000	96040000
13	79980000	80110000
13	75910000	76110000
13	99090000	99310000
13	31440000	31620000
13	31200000	31380000
14	33030000	34790000
14	35030000	36160000
14	97620000	99840000
14	66790000	67770000
14	62620000	63740000
14	57930000	58550000
14	80520000	81330000
14	78320000	79090000
14	105330000	105980000
14	101160000	102120000
14	61080000	61720000
14	56160000	56900000
14	76490000	77140000
14	71570000	72220000
14	94110000	94360000
14	93400000	93640000
14	77390000	77550000
14	50320000	50560000
14	51010000	51240000
14	81730000	81900000
14	59590000	59840000
14	61930000	62210000
14	69700000	69930000
14	22840000	23020000
14	55010000	55240000
14	69330000	69560000
14	102220000	102400000
14	52300000	52440000
14	70290000	70500000
14	71060000	71260000
14	100870000	101110000
14	100440000	100660000
14	52750000	52930000
14	100160000	100360000
14	32520000	32720000
14	91360000	91630000
14	61750000	61920000
14	21140000	21320000
14	103540000	103770000
14	55490000	55630000
14	74170000	74340000
14	99950000	100110000
14	96550000	96740000
14	67880000	68020000
14	55700000	55890000
14	65670000	65880000
14	75780000	75960000
14	77590000	77780000
14	64270000	64460000
14	89720000	89880000
14	104020000	104190000
14	103230000	103390000
14	74790000	74950000
15	29080000	30220000
15	86390000	88930000
15	39000000	40060000
15	27180000	28360000
15	93570000	94670000
15	56760000	57620000
15	76460000	77170000
15	81740000	82480000
15	92640000	93270000
15	60000000	60610000
15	38820000	38980000
15	94700000	94860000
15	66610000	66810000
15	78250000	78390000
15	74410000	74570000
15	65900000	66170000
15	91600000	91800000
15	66870000	67150000
15	77920000	78150000
15	63060000	63380000
15	31480000	31790000
15	101170000	101420000
15	59510000	59780000
15	89890000	90100000
15	25550000	25710000
15	64710000	64950000
15	34340000	34510000
15	70380000	70770000
15	92400000	92620000
15	67290000	67570000
15	57630000	57830000
15	31220000	31420000
15	101580000	101810000
15	81560000	81700000
15	89590000	89730000
15	52260000	52420000
15	90270000	90420000
15	90440000	90620000
15	63740000	63890000
15	60640000	60770000
15	75080000	75240000
15	83510000	83650000
15	81400000	81540000
15	90670000	90820000
16	75830000	77170000
16	46960000	48210000
16	82280000	83500000
16	12190000	13950000
16	34180000	35270000
16	67520000	68270000
16	14000000	14770000
16	16910000	17590000
16	12340000	12980000
16	85840000	86060000
16	58380000	58520000
16	66990000	67220000
16	27190000	27480000
16	75010000	75170000
16	15980000	16170000
16	31180000	31460000
16	89380000	89570000
16	75240000	75420000
16	23180000	23440000
16	84790000	84990000
16	56540000	56740000
16	11480000	11800000
16	58550000	58690000
16	57320000	57470000
16	10390000	10590000
16	23810000	24030000
16	3240000	3510000
16	3960000	4290000
16	10610000	10820000
16	81420000	81660000
16	11050000	11350000
16	67280000	67490000
16	71790000	71980000
16	2370000	2510000
16	68380000	68550000
16	50250000	50400000
16	85450000	85660000
16	81770000	81920000
16	89760000	89930000
16	29870000	30030000
16	3070000	3210000
16	23450000	23600000
17	67540000	68610000
17	2640000	3510000
17	63220000	64120000
17	8230000	8850000
17	34910000	35590000
17	31340000	32040000
17	39020000	39670000
17	71400000	72180000
17	5490000	6320000
17	55200000	55840000
17	31100000	31240000
17	6930000	7090000
17	690000	890000
17	28400000	28650000
17	7220000	7490000
17	78050000	78370000
17	33630000	33870000
17	16920000	17140000
17	19410000	19680000
17	46730000	46960000
17	41630000	41880000
17	67340000	67520000
17	60800000	61040000
17	72940000	73220000
17	37770000	38130000
17	55920000	56080000
17	33280000	33450000
17	56320000	56580000
17	66250000	66440000
17	77770000	77930000
17	9850000	10140000
17	46400000	46670000
17	33920000	34080000
17	39850000	40060000
17	27680000	27880000
17	57370000	57520000
17	71220000	71380000
17	8010000	8210000
17	27050000	27270000
17	54880000	55030000
17	27290000	27440000
17	4090000	4310000
17	47920000	48080000
17	1950000	2160000
17	61480000	61690000
17	27940000	28110000
17	17240000	17550000
17	6350000	6540000
17	75310000	75500000
17	47640000	47900000
17	74860000	75050000
17	1600000	1770000
17	80300000	80520000
17	64710000	64910000
17	4600000	4800000
17	49070000	49230000
17	38500000	38720000
17	75070000	75250000
17	54640000	54820000
17	1250000	1430000
17	7760000	7950000
17	74510000	74710000
17	74100000	74280000
17	73270000	73410000
17	76270000	76410000
17	70550000	70710000
17	29730000	29880000
17	39690000	39820000
17	79220000	79450000
17	37140000	37300000
17	48600000	48770000
17	38160000	38330000
17	3760000	3940000
17	25770000	25940000
17	40980000	41130000
17	76480000	76700000
17	80740000	80860000
17	21220000	21340000
18	39670000	40920000
18	7210000	8520000
18	5860000	6910000
18	52870000	54270000
18	5090000	5750000
18	54410000	55230000
18	19470000	20160000
18	32960000	33280000
18	43250000	43450000
18	74160000	74370000
18	29830000	30100000
18	67880000	68100000
18	60350000	60650000
18	23950000	24240000
18	3270000	3670000
18	30280000	30530000
18	55280000	55520000
18	34880000	35140000
18	47040000	47380000
18	57490000	57650000
18	20670000	20990000
18	48340000	48580000
18	33580000	33870000
18	33320000	33540000
18	2920000	3240000
18	28830000	29030000
18	19170000	19410000
18	45320000	45540000
18	77120000	77420000
18	60790000	60990000
18	56180000	56430000
18	56440000	56740000
18	12710000	12920000
18	45990000	46190000
18	20380000	20570000
18	29120000	29300000
18	21510000	21710000
18	74700000	74880000
18	46240000	46520000
18	71820000	72000000
18	60050000	60250000
18	42250000	42490000
18	43860000	44050000
1	118550000	120090000
1	4000000	5970000
1	221620000	222620000
1	29560000	31170000
1	57290000	58690000
1	233480000	234230000
1	243500000	244460000
1	86840000	87570000
1	2710000	3520000
1	169870000	170910000
1	17960000	19150000
1	61420000	62320000
1	34020000	35210000
1	192420000	193050000
1	6750000	7720000
1	213440000	214330000
1	198700000	199540000
1	150230000	150980000
1	186350000	186970000
1	199640000	200500000
1	210620000	211310000
1	146490000	147390000
1	168560000	169320000
1	54510000	55290000
1	229770000	230450000
1	36990000	37890000
1	59180000	60230000
1	38510000	39290000
1	94980000	95270000
1	48560000	48700000
1	245010000	245170000
1	68020000	68260000
1	214520000	214770000
1	159740000	159990000
1	87590000	87750000
1	182050000	182370000
1	198480000	198660000
1	182930000	183210000
1	8070000	8310000
1	155310000	155570000
1	39320000	39520000
1	165350000	165550000
1	62650000	62860000
1	45790000	45970000
1	168340000	168550000
1	20270000	20510000
1	169560000	169760000
1	203470000	203770000
1	44210000	44410000
1	66710000	66910000
1	178270000	178480000
1	2340000	2480000
1	180940000	181130000
1	25210000	25430000
1	55590000	55740000
1	21540000	21700000
1	184760000	184960000
1	40270000	40500000
1	93330000	93470000
1	11350000	11700000
1	90260000	90450000
1	26920000	27130000
1	110320000	110490000
1	2150000	2310000
1	24510000	24710000
1	112000000	112290000
1	200560000	200780000
1	94090000	94300000
1	153320000	153460000
1	95310000	95510000
1	53720000	53910000
1	182560000	182750000
1	206890000	207170000
1	13980000	14130000
1	153770000	153950000
1	41720000	41900000
1	212230000	212470000
1	36560000	36760000
1	20540000	20820000
1	115490000	115670000
1	164530000	164760000
1	208180000	208420000
1	201490000	201780000
1	175110000	175300000
1	160960000	161120000
1	160390000	160580000
1	202710000	202970000
1	209730000	209930000
1	23000000	23250000
1	226810000	227020000
1	65290000	65530000
1	15850000	16080000
1	156330000	156590000
1	154620000	154880000
1	113420000	113620000
1	152020000	152170000
1	47910000	48170000
1	178510000	178720000
1	15430000	15620000
1	204530000	204780000
1	11070000	11290000
1	118060000	118300000
1	16110000	16310000
1	24980000	25160000
1	201210000	201370000
1	171760000	171950000
1	202140000	202300000
1	46480000	46650000
1	159740000	159880000
1	25910000	26120000
1	43680000	43900000
1	12150000	12290000
1	26180000	26340000
1	208010000	208160000
1	167530000	167670000
1	43360000	43550000
1	110730000	110870000
1	203280000	203460000
1	36030000	36230000
1	19200000	19430000
1	235980000	236140000
1	203000000	203200000
1	24730000	24940000
1	204120000	204340000
1	85230000	85390000
1	156040000	156260000
1	111160000	111320000
1	166880000	167020000
1	9330000	9540000
1	112360000	112540000
1	32660000	32840000
1	32270000	32450000
1	116120000	116300000
1	45310000	45460000
1	27720000	27930000
1	27410000	27610000
1	200880000	201080000
1	84930000	85080000
1	33360000	33550000
1	16400000	16530000
1	8620000	8780000
1	15630000	15770000
1	32080000	32240000
1	1050000	1230000
1	31850000	32010000
1	109800000	109950000
1	184040000	184190000
1	14160000	14280000
20	53300000	54700000
20	23640000	25380000
20	23650000	25170000
20	58600000	60500000
20	40360000	41950000
20	10530000	11520000
20	50850000	52010000
20	18570000	19630000
20	7990000	8710000
20	46310000	47230000
20	20820000	21590000
20	51110000	51890000
20	23980000	24890000
20	16780000	17420000
20	1730000	2410000
20	22660000	23320000
20	10650000	11260000
20	42370000	42710000
20	49400000	49570000
20	23420000	23590000
20	44120000	44400000
20	35830000	36170000
20	37260000	37570000
20	55220000	55580000
20	9610000	9890000
20	48220000	48520000
20	5510000	5770000
20	1500000	1710000
20	55940000	56080000
20	36670000	36980000
20	30380000	30680000
20	57450000	57610000
20	62310000	62600000
20	36210000	36630000
20	40090000	40330000
20	34560000	34730000
20	49600000	49930000
20	47250000	47530000
20	45150000	45340000
20	9380000	9590000
20	56800000	57010000
20	6560000	6750000
20	52180000	52550000
20	39590000	39750000
20	770000	950000
20	32030000	32260000
20	4570000	4710000
20	48560000	48700000
20	39360000	39560000
20	20580000	20800000
20	17480000	17660000
20	32890000	33090000
20	1260000	1450000
20	52680000	52820000
20	20340000	20550000
20	48800000	49070000
20	55660000	55910000
20	17680000	17890000
20	33880000	34040000
20	44420000	44590000
20	57640000	57790000
20	320000	470000
20	33120000	33300000
20	49970000	50210000
20	31470000	31700000
20	31070000	31240000
20	36680000	36840000
20	39780000	39960000
20	43090000	43270000
20	49080000	49200000
20	35880000	36030000
20	44610000	44770000
19	36810000	38280000
19	31160000	32750000
19	5990000	6940000
19	11740000	12770000
19	44350000	45000000
19	57700000	59040000
19	16830000	17170000
19	47940000	48200000
19	56010000	56140000
19	40040000	40230000
19	13990000	14190000
19	38390000	38570000
19	42600000	42830000
19	30080000	30200000
19	1520000	1830000
19	55690000	55970000
19	9710000	9920000
19	19460000	19610000
19	4800000	5030000
19	34670000	34850000
19	13070000	13210000
19	39600000	39820000
19	50850000	51020000
19	3980000	4210000
19	2460000	2620000
19	10360000	10510000
19	3300000	3480000
19	16330000	16520000
19	46560000	46770000
19	1020000	1240000
19	18710000	19020000
19	47360000	47490000
19	19640000	19760000
19	41160000	41320000
19	33710000	33900000
19	41940000	42100000
19	2940000	3180000
19	10820000	10970000
19	35820000	35990000
19	46000000	46190000
19	2150000	2390000
19	16140000	16300000
19	10000000	10180000
19	7730000	7880000
19	15280000	15500000
19	50180000	50360000
19	46890000	47010000
19	18560000	18680000
19	12810000	12980000
22	20740000	21380000
22	50180000	51170000
22	27120000	28210000
22	34790000	35440000
22	44360000	45040000
22	22090000	22300000
22	39940000	40400000
22	46020000	46370000
22	28990000	29230000
22	29770000	29960000
22	43240000	43540000
22	18330000	18520000
22	26870000	27050000
22	38440000	38750000
22	42080000	42340000
22	19700000	19920000
22	46750000	46930000
22	45650000	45830000
22	42540000	42840000
22	39550000	39710000
22	40430000	40740000
22	36930000	37150000
22	40820000	41040000
22	41310000	41530000
22	37200000	37400000
22	35810000	35990000
22	23110000	23290000
22	41780000	42040000
22	19950000	20110000
22	39400000	39520000
22	39730000	39920000
22	43610000	43780000
22	46950000	47150000
22	23490000	23630000
22	19460000	19640000
22	30500000	30640000
22	29260000	29430000
22	37710000	37860000
21	41160000	42470000
21	27200000	28090000
21	35020000	35260000
21	15840000	16100000
21	18750000	18940000
21	30510000	30740000
21	19070000	19280000
21	42650000	42830000
21	35760000	36000000
21	39530000	39730000
21	33760000	33980000
21	45210000	45420000
21	45550000	45720000
21	43550000	43880000
21	43250000	43540000
21	26780000	26960000
21	43560000	43700000
21	34570000	34810000
21	45920000	46170000
21	46370000	46550000
21	36100000	36250000
21	46210000	46350000
21	46710000	46860000
2	18630000	20080000
2	40040000	42040000
2	103430000	105560000
2	65840000	68270000
2	150440000	152100000
2	133020000	134600000
2	220570000	222840000
2	205020000	206820000
2	164030000	165340000
2	96780000	97650000
2	129060000	130680000
2	84650000	85530000
2	7530000	8860000
2	163240000	163890000
2	109460000	110100000
2	138650000	139590000
2	32920000	33810000
2	147780000	148670000
2	174220000	175230000
2	233450000	234180000
2	135730000	136490000
2	239920000	240950000
2	98330000	98990000
2	100170000	100890000
2	217630000	218460000
2	207650000	208360000
2	181940000	182570000
2	48050000	48690000
2	158880000	159520000
2	161100000	161890000
2	118960000	119610000
2	27920000	28690000
2	237230000	237980000
2	173880000	174080000
2	61000000	61220000
2	47240000	47540000
2	187350000	187510000
2	65480000	65730000
2	121470000	121790000
2	122290000	122450000
2	46230000	46600000
2	169290000	169570000
2	220260000	220540000
2	178020000	178180000
2	225670000	225930000
2	159740000	160000000
2	39280000	39460000
2	47730000	47990000
2	223170000	223440000
2	224910000	225130000
2	217370000	217540000
2	42130000	42300000
2	7020000	7190000
2	29170000	29430000
2	158620000	158860000
2	38520000	38750000
2	25190000	25370000
2	192430000	192580000
2	169820000	169980000
2	16790000	16940000
2	43470000	43720000
2	121100000	121430000
2	27290000	27530000
2	74040000	74370000
2	103070000	103250000
2	197950000	198240000
2	241130000	241360000
2	38780000	38970000
2	86050000	86320000
2	60520000	60780000
2	10600000	10800000
2	54720000	54930000
2	64270000	64550000
2	101620000	101840000
2	65130000	65270000
2	42320000	42510000
2	99010000	99220000
2	227970000	228120000
2	105960000	106150000
2	9330000	9490000
2	113340000	113490000
2	218630000	218900000
2	232100000	232300000
2	20640000	20840000
2	128050000	128240000
2	121880000	122080000
2	217080000	217280000
2	68940000	69150000
2	30430000	30660000
2	64810000	65100000
2	231690000	231880000
2	28790000	28990000
2	74890000	75110000
2	99250000	99450000
2	235180000	235410000
2	220020000	220170000
2	43180000	43460000
2	11810000	11940000
2	102620000	102850000
2	72980000	73100000
2	64560000	64720000
2	190320000	190480000
2	46690000	46870000
2	68360000	68500000
2	70140000	70290000
2	219880000	220010000
2	231500000	231660000
2	219560000	219710000
2	74670000	74820000
2	31390000	31550000
2	74440000	74630000
2	106360000	106510000
3	40570000	41920000
3	3230000	4320000
3	4350000	5240000
3	139130000	140590000
3	39560000	40230000
3	134310000	135640000
3	50680000	51390000
3	137870000	138680000
3	96570000	97370000
3	136810000	137660000
3	181400000	182410000
3	44350000	45000000
3	157290000	158250000
3	176720000	178100000
3	27750000	28380000
3	104250000	105130000
3	121260000	122020000
3	135770000	136750000
3	152730000	153500000
3	187440000	188670000
3	16630000	17270000
3	124640000	125300000
3	107510000	108200000
3	71920000	72890000
3	188970000	189650000
3	142770000	143400000
3	71020000	71660000
3	32980000	33130000
3	138820000	139000000
3	194180000	194350000
3	112810000	112990000
3	106950000	107140000
3	13540000	13690000
3	186550000	186880000
3	134010000	134190000
3	14280000	14520000
3	150000000	150220000
3	149700000	149910000
3	126430000	126700000
3	15670000	15870000
3	45080000	45260000
3	52040000	52180000
3	195960000	196220000
3	45540000	45710000
3	133160000	133320000
3	50410000	50590000
3	193490000	193850000
3	142530000	142710000
3	172200000	172360000
3	184270000	184500000
3	123000000	123280000
3	160980000	161160000
3	186310000	186490000
3	113860000	114060000
3	148820000	149000000
3	13720000	13890000
3	128350000	128560000
3	119200000	119410000
3	159560000	159740000
3	171740000	172030000
3	57960000	58150000
3	105410000	105590000
3	8480000	8640000
3	182960000	183110000
3	124290000	124430000
3	124470000	124630000
3	141020000	141170000
3	15280000	15440000
3	193170000	193300000
3	184090000	184250000
3	45980000	46110000
3	156250000	156390000
3	69200000	69350000
3	17300000	17440000
3	129350000	129540000
3	141450000	141620000
3	129180000	129340000
3	193870000	194020000
4	100980000	103270000
4	169110000	170580000
4	17510000	18590000
4	145080000	145990000
4	13620000	15190000
4	125260000	126180000
4	16310000	17450000
4	12720000	13560000
4	99160000	100000000
4	10540000	11740000
4	82310000	83210000
4	81250000	81960000
4	129090000	129830000
4	86010000	86690000
4	151180000	151840000
4	109650000	110280000
4	75790000	76410000
4	103340000	104020000
4	55170000	55820000
4	108910000	109520000
4	140600000	141220000
4	89170000	89420000
4	150950000	151130000
4	26020000	26320000
4	110920000	111150000
4	90170000	90370000
4	153380000	153650000
4	123660000	123810000
4	148600000	148790000
4	38880000	39130000
4	84000000	84190000
4	42560000	42810000
4	87830000	88040000
4	184370000	184580000
4	95330000	95520000
4	152320000	152500000
4	25160000	25350000
4	710000	1000000
4	106430000	106620000
4	26850000	27010000
4	154260000	154520000
4	40140000	40320000
4	88940000	89130000
4	166090000	166240000
4	190540000	190670000
4	57440000	57680000
4	114460000	114680000
4	2230000	2440000
4	71520000	71700000
4	1690000	1920000
4	78360000	78550000
4	185180000	185390000
4	77970000	78120000
4	78630000	78830000
4	77090000	77330000
4	154050000	154250000
4	39460000	39660000
4	2750000	2950000
4	7800000	7980000
4	37600000	37790000
4	37810000	38030000
4	8450000	8610000
4	6220000	6340000
5	96550000	98170000
5	122980000	125620000
5	88010000	89600000
5	87050000	87990000
5	140120000	140950000
5	81630000	82900000
5	56590000	57790000
5	52450000	53520000
5	55550000	56550000
5	63930000	64830000
5	59110000	59940000
5	6830000	7760000
5	35030000	35960000
5	32680000	33370000
5	107960000	108820000
5	178020000	178930000
5	64080000	64820000
5	142280000	143350000
5	157480000	158550000
5	66530000	67560000
5	170160000	170790000
5	101890000	102500000
5	80710000	81530000
5	126880000	127540000
5	39930000	40720000
5	60330000	60960000
5	132430000	133310000
5	67570000	68310000
5	137910000	138600000
5	158730000	159420000
5	73190000	73950000
5	141050000	141280000
5	98240000	98380000
5	122740000	122900000
5	54690000	54980000
5	125670000	125850000
5	111540000	111770000
5	112360000	112660000
5	52230000	52380000
5	72510000	72750000
5	173040000	173400000
5	58480000	58680000
5	94960000	95180000
5	53810000	54150000
5	157230000	157380000
5	141360000	141520000
5	179090000	179330000
5	154030000	154270000
5	71420000	71610000
5	110480000	110620000
5	31570000	31800000
5	55250000	55500000
5	39370000	39570000
5	171890000	172110000
5	150400000	150640000
5	125980000	126140000
5	79380000	79590000
5	31850000	32080000
5	156930000	157170000
5	142090000	142270000
5	58790000	58970000
5	42900000	43080000
5	176730000	176930000
5	139160000	139360000
5	149020000	149200000
5	118590000	118750000
5	159620000	159770000
5	72900000	73080000
5	172130000	172360000
5	14710000	14890000
5	172390000	172590000
5	133360000	133480000
5	133710000	133920000
5	6600000	6760000
5	10450000	10650000
5	167690000	167900000
5	139600000	139740000
5	153830000	154010000
5	176520000	176710000
5	169670000	169840000
5	136960000	137080000
5	14130000	14270000
6	18570000	20040000
6	87780000	89610000
6	112460000	114250000
6	74470000	75920000
6	88040000	89600000
6	39310000	40980000
6	20550000	21580000
6	148850000	149860000
6	116310000	117000000
6	11580000	12610000
6	75930000	76540000
6	27120000	27760000
6	161130000	161790000
6	73100000	73900000
6	37670000	38620000
6	82970000	83760000
6	1570000	2700000
6	169340000	170090000
6	121740000	122360000
6	135830000	136550000
6	138430000	139080000
6	151950000	152620000
6	4220000	4990000
6	170170000	170900000
6	105880000	106750000
6	134450000	135260000
6	780000	1410000
6	11640000	12280000
6	45380000	45680000
6	47050000	47280000
6	138010000	138290000
6	71410000	71600000
6	158630000	158940000
6	31090000	31350000
6	24870000	25050000
6	36980000	37170000
6	17610000	17790000
6	132600000	132810000
6	35530000	35710000
6	136690000	136870000
6	25280000	25460000
6	136960000	137120000
6	131220000	131420000
6	74190000	74350000
6	134240000	134390000
6	53360000	53540000
6	52130000	52260000
6	42620000	42850000
6	26340000	26530000
6	52280000	52480000
6	64280000	64460000
6	35230000	35440000
6	71870000	72060000
6	2760000	2980000
6	33740000	34110000
6	43760000	44040000
6	41750000	42010000
6	3110000	3250000
6	34150000	34390000
6	108860000	109150000
6	42190000	42520000
6	150400000	150690000
6	159110000	159410000
6	111350000	111540000
6	155230000	155480000
6	32200000	32370000
6	41370000	41560000
6	139530000	139680000
6	4030000	4150000
6	117750000	117930000
6	39110000	39290000
6	43190000	43470000
6	3740000	3990000
6	154980000	155140000
6	13330000	13580000
6	108000000	108170000
6	143010000	143270000
6	90120000	90330000
6	15240000	15440000
6	129920000	130080000
6	158160000	158300000
6	30880000	31050000
6	31630000	31800000
6	34430000	34580000
6	144410000	144550000
6	7080000	7240000
6	33540000	33680000
6	32840000	32960000
7	113600000	115560000
7	103080000	104500000
7	13440000	14680000
7	83550000	84650000
7	45920000	47190000
7	61960000	62690000
7	7050000	8330000
7	65420000	66470000
7	40270000	41780000
7	112150000	113080000
7	96800000	97460000
7	23800000	24740000
7	19740000	20650000
7	157220000	158200000
7	81660000	82370000
7	71230000	71980000
7	27220000	28090000
7	123770000	124460000
7	95680000	96670000
7	80330000	81100000
7	90710000	91430000
7	37250000	37890000
7	41970000	42890000
7	25250000	25880000
7	16990000	17710000
7	38810000	39550000
7	70290000	71200000
7	17740000	18370000
7	12670000	13300000
7	111390000	112100000
7	36480000	37230000
7	1600000	2390000
7	21290000	21540000
7	116250000	116450000
7	98630000	98910000
7	95150000	95310000
7	23590000	23750000
7	150200000	150450000
7	48010000	48170000
7	2910000	3250000
7	44260000	44570000
7	39650000	39770000
7	24850000	25060000
7	25940000	26100000
7	105890000	106100000
7	1230000	1460000
7	35730000	35900000
7	142720000	142900000
7	142940000	143090000
7	43610000	43750000
7	155380000	155560000
7	1010000	1210000
7	139740000	140030000
7	39940000	40110000
7	131180000	131350000
7	99230000	99430000
7	94900000	95100000
7	5570000	5750000
7	134100000	134300000
7	92320000	92470000
7	129470000	129650000
7	130560000	130720000
7	72990000	73150000
7	44610000	44860000
7	73610000	73820000
7	86910000	87050000
7	154960000	155140000
7	100760000	100920000
7	75470000	75670000
7	128530000	128730000
7	142540000	142700000
X	7950000	8700000
X	130950000	131760000
X	48330000	48980000
X	8790000	9710000
X	149120000	149860000
X	128720000	129330000
X	153020000	153180000
X	118710000	118910000
X	1560000	1720000
X	106900000	107020000
8	127830000	130750000
8	90730000	92100000
8	62540000	64020000
8	71660000	72680000
8	69470000	70530000
8	65450000	66470000
8	58310000	59340000
8	97300000	98560000
8	108830000	109740000
8	142460000	143590000
8	94740000	95400000
8	17160000	17780000
8	19200000	20020000
8	17850000	18700000
8	104710000	105480000
8	36690000	37580000
8	102330000	103230000
8	126720000	127800000
8	132020000	132820000
8	134550000	135690000
8	142820000	143580000
8	49230000	49850000
8	127860000	128710000
8	140690000	141420000
8	29190000	29920000
8	124810000	125450000
8	123710000	124040000
8	101260000	101540000
8	81160000	81430000
8	38690000	38860000
8	72740000	72900000
8	27160000	27300000
8	4670000	4850000
8	42270000	42520000
8	39890000	40060000
8	56750000	56930000
8	81900000	82140000
8	80970000	81140000
8	103870000	104040000
8	8600000	8870000
8	52740000	52920000
8	141460000	141660000
8	103640000	103830000
8	11610000	11760000
8	120880000	121110000
8	139740000	139950000
8	135700000	135900000
8	67390000	67520000
8	130830000	131120000
8	30510000	30670000
8	53640000	53860000
8	41840000	42000000
8	10430000	10690000
8	22470000	22770000
8	33320000	33450000
8	48680000	48870000
8	20060000	20250000
8	42540000	42680000
8	126130000	126440000
8	66720000	66940000
8	96050000	96270000
8	124450000	124740000
8	82670000	82790000
8	133870000	134210000
8	144170000	144320000
8	42010000	42240000
8	134220000	134460000
8	22270000	22440000
8	118920000	119120000
8	27320000	27440000
8	126450000	126670000
8	144460000	144620000
8	11260000	11410000
8	142200000	142360000
8	131180000	131380000

## Sheet: HK1
Supplementary Table S4: TADs called by Arrowhead from Hi-C libraries
#chr	x1	x2
9	10030000	12540000
9	104520000	106680000
9	104990000	106670000
9	2850000	3730000
9	2110000	2820000
9	140750000	141010000
9	103400000	104020000
9	101040000	101880000
9	94860000	95410000
9	81920000	82630000
9	98990000	99450000
9	71220000	71610000
9	31830000	32330000
9	116020000	116440000
9	118330000	119430000
9	20600000	21060000
9	136230000	136370000
9	36760000	37420000
9	110150000	111590000
9	15170000	15650000
9	137090000	137330000
9	132860000	132990000
9	73350000	73870000
9	73890000	74630000
9	75450000	75810000
9	133340000	133550000
9	99460000	99610000
9	103400000	104130000
9	103390000	103610000
9	119470000	120230000
9	81170000	81770000
9	25960000	26360000
9	117150000	117770000
9	93650000	94500000
9	87250000	87900000
9	113380000	114100000
9	130920000	131810000
9	114350000	114840000
9	18220000	19020000
9	135890000	136030000
9	80370000	80790000
9	107510000	108210000
9	460000	810000
9	126170000	126800000
9	35110000	35580000
9	32360000	32570000
9	77360000	77720000
9	5160000	5610000
9	33020000	33270000
9	96770000	96970000
9	123340000	123950000
9	74890000	75440000
9	140520000	141080000
9	72930000	73230000
9	129650000	130180000
9	134420000	134620000
9	21810000	22260000
9	37900000	38360000
9	100440000	100670000
9	99090000	99440000
9	118340000	118920000
9	89070000	89560000
9	71640000	71860000
9	112310000	112930000
9	75850000	76170000
9	124850000	125110000
9	21210000	21470000
9	97410000	97890000
9	103070000	103360000
9	130210000	130880000
9	137210000	137330000
9	37900000	38070000
9	139380000	139590000
9	37470000	37850000
9	115150000	115580000
9	32580000	32970000
9	38420000	38610000
9	88640000	88880000
9	14460000	14790000
9	135230000	135850000
9	3740000	3990000
9	139030000	139160000
9	28760000	29150000
9	79040000	79330000
9	90760000	91190000
9	19040000	19190000
9	31440000	31790000
9	12690000	12940000
9	33930000	34320000
9	136630000	136870000
9	21520000	21790000
9	79370000	79760000
9	103080000	103220000
9	85810000	86220000
9	35120000	35460000
9	120380000	120900000
9	93520000	93640000
9	136060000	136190000
9	95410000	95560000
9	86540000	86930000
9	116850000	117080000
9	27710000	28050000
9	93660000	94190000
9	111640000	112280000
9	27320000	27540000
9	84780000	85200000
9	123960000	124200000
9	14060000	14370000
9	124280000	124820000
9	133950000	134400000
9	13430000	13900000
9	139950000	140160000
9	132390000	132570000
9	140180000	140430000
9	17100000	17470000
9	13040000	13370000
9	19040000	19460000
9	100810000	101030000
9	34380000	34630000
9	91960000	92180000
9	91220000	91600000
9	131880000	132380000
9	94870000	95050000
9	136450000	136590000
9	4380000	4650000
9	78500000	78930000
9	109930000	110110000
9	76250000	76640000
9	72550000	72860000
9	125830000	126140000
9	134640000	135130000
9	112650000	112830000
9	116200000	116430000
9	133570000	133730000
9	127160000	127520000
9	31110000	31310000
9	840000	1000000
9	112960000	113350000
9	100200000	100380000
9	98040000	98280000
9	34660000	35050000
9	111060000	111580000
9	114690000	114840000
9	104140000	104330000
9	131590000	131800000
9	36750000	37030000
9	33320000	33540000
9	125590000	125780000
9	130210000	130680000
9	96440000	96730000
9	19920000	20370000
9	21810000	21980000
9	75460000	75660000
9	102010000	102350000
9	117160000	117410000
9	125230000	125570000
9	101740000	101900000
9	114490000	114840000
9	19470000	19890000
9	6050000	6310000
9	4750000	4990000
9	127640000	128140000
9	126840000	127100000
9	79390000	79600000
9	90290000	90510000
9	112640000	112930000
9	74650000	74880000
9	133570000	133920000
9	17520000	17780000
9	1020000	1360000
9	14610000	14790000
9	118970000	119410000
9	37060000	37400000
9	72270000	72540000
9	22010000	22250000
9	103620000	104130000
9	15860000	16140000
9	135150000	135270000
9	27020000	27280000
9	117460000	117770000
9	117790000	118290000
9	108650000	108960000
9	124610000	124780000
9	28120000	28430000
9	101050000	101550000
9	114850000	115130000
9	110250000	110650000
9	118350000	118610000
9	90780000	90990000
9	128750000	129250000
9	6400000	6750000
9	35770000	35910000
9	132600000	132840000
9	107530000	107910000
9	72040000	72200000
9	120930000	121260000
9	20620000	20930000
9	95090000	95390000
9	85260000	85570000
9	600000	760000
9	20970000	21120000
9	85920000	86200000
9	129680000	129960000
9	128170000	128700000
9	23520000	23830000
9	101580000	101920000
9	35590000	35910000
9	138690000	138840000
9	115170000	115470000
9	81430000	81730000
9	124290000	124450000
9	130690000	130870000
9	91640000	91910000
9	36200000	36380000
9	80070000	80360000
9	127950000	128140000
9	5440000	5590000
9	133740000	133920000
9	95920000	96070000
9	129970000	130200000
9	22270000	22460000
9	15190000	15420000
9	137360000	137580000
9	86990000	87250000
9	112970000	113190000
9	38080000	38360000
9	80390000	80650000
9	131890000	132100000
9	73890000	74180000
9	123510000	123700000
9	121290000	121570000
9	127150000	127300000
9	102760000	103030000
9	119460000	119760000
9	4050000	4360000
9	37120000	37300000
9	127660000	127920000
9	127340000	127500000
9	116480000	116810000
9	79780000	80010000
9	5830000	6030000
9	34670000	34890000
9	74430000	74630000
9	94510000	94780000
9	118640000	118920000
9	89970000	90250000
9	128170000	128530000
9	108350000	108480000
9	82160000	82370000
9	15430000	15610000
9	108000000	108170000
9	3740000	4360000
9	114510000	114670000
9	35600000	35740000
9	135280000	135460000
9	78260000	78480000
9	139670000	139930000
9	132130000	132370000
9	112310000	112600000
9	20190000	20350000
9	27710000	27870000
9	16180000	16520000
9	111690000	111870000
9	84120000	84260000
9	133980000	134210000
9	137960000	138300000
9	74200000	74380000
9	101590000	101730000
9	113390000	113670000
9	78750000	78910000
9	139680000	139830000
9	134220000	134400000
9	130500000	130680000
9	113210000	113370000
9	98780000	98970000
9	140520000	140700000
9	138470000	138680000
9	109040000	109270000
9	36400000	36570000
9	5180000	5380000
9	81190000	81380000
9	130990000	131180000
9	16880000	17020000
9	134850000	134970000
9	112150000	112290000
9	15990000	16140000
9	123150000	123310000
9	131220000	131380000
10	65750000	69310000
10	108040000	111540000
10	82740000	85690000
10	30940000	32090000
10	44050000	45560000
10	30970000	31810000
10	130040000	131880000
10	132000000	133370000
10	35890000	37140000
10	67990000	68690000
10	28920000	29640000
10	113160000	113850000
10	127640000	128220000
10	98120000	99000000
10	76000000	76960000
10	49900000	50570000
10	54000000	54540000
10	89610000	90190000
10	96920000	97400000
10	18220000	18550000
10	24960000	25270000
10	98120000	98800000
10	29850000	30250000
10	43320000	43870000
10	96390000	96860000
10	27040000	27160000
10	102050000	102740000
10	22850000	23270000
10	61850000	62530000
10	70130000	70710000
10	50780000	50990000
10	111620000	112030000
10	106750000	107520000
10	116180000	116580000
10	112460000	113120000
10	100510000	101070000
10	64930000	65390000
10	35380000	35860000
10	48300000	48660000
10	79620000	79790000
10	111880000	112050000
10	126150000	126570000
10	11820000	12210000
10	54040000	54360000
10	125920000	126070000
10	14530000	14890000
10	30650000	30900000
10	23590000	23810000
10	95070000	95270000
10	101490000	101980000
10	15470000	15790000
10	24490000	24820000
10	104540000	105140000
10	24880000	25370000
10	26620000	26850000
10	112060000	112320000
10	60530000	60980000
10	5480000	5670000
10	114270000	114930000
10	115440000	115880000
10	102920000	103330000
10	69610000	70080000
10	52780000	53180000
10	34940000	35280000
10	14940000	15150000
10	77060000	77790000
10	10700000	11070000
10	90990000	91470000
10	82130000	82310000
10	37530000	37790000
10	6230000	6440000
10	116300000	116580000
10	3220000	3790000
10	850000	1110000
10	71920000	72160000
10	74990000	75420000
10	99160000	99440000
10	126670000	127400000
10	61380000	61820000
10	23420000	23580000
10	90990000	91160000
10	52540000	52730000
10	63500000	64010000
10	64920000	65530000
10	103910000	104430000
10	122680000	123490000
10	78350000	78750000
10	99500000	99850000
10	122090000	122590000
10	117550000	118050000
10	129670000	129880000
10	121330000	121670000
10	28500000	28680000
10	113890000	114200000
10	74120000	74640000
10	124000000	124330000
10	92640000	93030000
10	133990000	134450000
10	91920000	92390000
10	125330000	125710000
10	96940000	97120000
10	13200000	13380000
10	120940000	121270000
10	70970000	71160000
10	60540000	60700000
10	13670000	13820000
10	99500000	99660000
10	75580000	75870000
10	81120000	81260000
10	78910000	79430000
10	30290000	30570000
10	86120000	86300000
10	93810000	94200000
10	21360000	21540000
10	11530000	11800000
10	61840000	61980000
10	70510000	70710000
10	118580000	118930000
10	96080000	96300000
10	7540000	7760000
10	90770000	90970000
10	73620000	74100000
10	16610000	16830000
10	91170000	91470000
10	102040000	102280000
10	6460000	6700000
10	24660000	24810000
10	2950000	3090000
10	106150000	106380000
10	16870000	17290000
10	18350000	18520000
10	64350000	64570000
10	101120000	101360000
10	75260000	75420000
10	94830000	95050000
10	43040000	43290000
10	95290000	95440000
10	35580000	35860000
10	59910000	60050000
10	32520000	32670000
10	103590000	103800000
10	76450000	76860000
10	124780000	125310000
10	61840000	62190000
10	54560000	54930000
10	32110000	32300000
10	73850000	74110000
10	34940000	35100000
10	91550000	91900000
10	124030000	124190000
10	97740000	98100000
10	60300000	60500000
10	64610000	64880000
10	13830000	14220000
10	91180000	91330000
10	111620000	111860000
10	72660000	73040000
10	54370000	54540000
10	77810000	78310000
10	72310000	72520000
10	15170000	15420000
10	114970000	115360000
10	50590000	50750000
10	12290000	12510000
10	103940000	104140000
10	97420000	97630000
10	124520000	124750000
10	90570000	90750000
10	105460000	105640000
10	120790000	120930000
10	61010000	61350000
10	70740000	70930000
10	115910000	116210000
10	95640000	96030000
10	86330000	86510000
10	14240000	14510000
10	93510000	93710000
10	17310000	17470000
10	118960000	119230000
10	116610000	116890000
10	34740000	34920000
10	76870000	76990000
10	11820000	12030000
10	116060000	116210000
10	280000	480000
10	126210000	126430000
10	88150000	88370000
10	100220000	100450000
10	117670000	117990000
10	98790000	98990000
10	21560000	21770000
10	113900000	114080000
10	87820000	88130000
10	103340000	103540000
10	97960000	98100000
10	97160000	97370000
10	104850000	105110000
10	73060000	73440000
10	88440000	88670000
10	104570000	104830000
10	69360000	69540000
10	43330000	43610000
10	53760000	53970000
10	21820000	22010000
10	134670000	135040000
10	134270000	134450000
10	32330000	32490000
10	90320000	90570000
10	61590000	61800000
10	2080000	2320000
10	102310000	102640000
10	104670000	104830000
10	13390000	13610000
10	120010000	120310000
10	69820000	69960000
10	120320000	120780000
10	98130000	98330000
10	62200000	62400000
10	62570000	62830000
10	80820000	80950000
10	114710000	114890000
10	93250000	93480000
10	70290000	70470000
10	49550000	49720000
10	105170000	105380000
10	550000	770000
10	24490000	24640000
10	123680000	123900000
10	79800000	80410000
10	52810000	52990000
10	119250000	119510000
10	99670000	99850000
10	94230000	94400000
10	106420000	106680000
10	33300000	33450000
10	35380000	35510000
10	43700000	43870000
10	104220000	104430000
10	129500000	129650000
10	98560000	98740000
10	73660000	73830000
10	7910000	8050000
10	128270000	128450000
10	120510000	120780000
10	61380000	61560000
10	63500000	63640000
10	94630000	94800000
10	120020000	120190000
10	95460000	95620000
10	97770000	97930000
10	122150000	122360000
10	75880000	76000000
10	33480000	33610000
10	18760000	18950000
10	62020000	62190000
10	106810000	107110000
10	64010000	64190000
10	77010000	77150000
10	74370000	74600000
10	123500000	123670000
10	71540000	71700000
10	99990000	100180000
10	134460000	134620000
10	71710000	71870000
10	127670000	127840000
10	126680000	126840000
10	126850000	127010000
10	94440000	94600000
10	95820000	95960000
10	74650000	74790000
11	48180000	50770000
11	79380000	80970000
11	114570000	116200000
11	29520000	30180000
11	68860000	69470000
11	81330000	81960000
11	84450000	85270000
11	132930000	133740000
11	123600000	124210000
11	30340000	30950000
11	108560000	109680000
11	130880000	131540000
11	119340000	119990000
11	94880000	95490000
11	116620000	116960000
11	95770000	96140000
11	110550000	111130000
11	86720000	87020000
11	11050000	11700000
11	4380000	4570000
11	56580000	57030000
11	128870000	129200000
11	15860000	16470000
11	103060000	103520000
11	86140000	86540000
11	25990000	26290000
11	15830000	16650000
11	89970000	90190000
11	1290000	1530000
11	69490000	69710000
11	65390000	66050000
11	77360000	77770000
11	2030000	2180000
11	27370000	27510000
11	60680000	60960000
11	66120000	67020000
11	18070000	18780000
11	69780000	69920000
11	82610000	82900000
11	59580000	59980000
11	11050000	11810000
11	860000	1060000
11	27190000	27520000
11	1660000	2180000
11	93620000	93880000
11	3680000	3830000
11	62660000	62800000
11	106010000	106570000
11	26890000	27170000
11	72550000	73000000
11	85330000	85550000
11	63530000	63940000
11	104130000	104700000
11	134210000	134940000
11	121080000	121490000
11	74610000	74980000
11	76880000	77320000
11	20400000	20650000
11	9630000	10390000
11	3870000	4100000
11	73950000	74300000
11	92650000	92920000
11	111440000	111720000
11	12350000	12940000
11	122940000	123140000
11	103550000	104060000
11	69780000	70040000
11	27720000	28070000
11	63760000	63920000
11	1660000	2020000
11	122120000	122400000
11	12970000	13400000
11	122450000	122720000
11	33380000	33780000
11	62340000	62640000
11	118510000	118870000
11	91910000	92280000
11	113830000	114140000
11	85710000	85950000
11	59300000	59570000
11	19580000	19920000
11	121280000	121460000
11	129790000	130020000
11	118000000	118440000
11	131720000	132010000
11	14280000	14520000
11	94340000	94630000
11	130300000	130740000
11	120200000	120350000
11	70280000	71270000
11	129630000	129760000
11	4650000	5030000
11	124260000	124460000
11	10800000	10960000
11	103170000	103510000
11	122730000	122910000
11	78330000	78820000
11	27530000	27690000
11	124490000	124710000
11	82410000	82580000
11	100880000	101520000
11	92350000	92630000
11	61560000	61880000
11	64210000	64500000
11	120370000	120820000
11	57430000	57590000
11	110060000	110300000
11	7520000	7710000
11	125780000	126070000
11	19960000	20150000
11	116760000	116970000
11	88030000	88280000
11	5480000	5830000
11	34940000	35430000
11	65420000	65790000
11	47430000	47860000
11	32050000	32190000
11	129230000	129610000
11	2200000	2450000
11	5120000	5420000
11	62150000	62300000
11	76430000	76740000
11	95950000	96100000
11	102570000	102920000
11	75610000	75860000
11	19080000	19280000
11	35480000	36300000
11	61210000	61530000
11	8200000	8590000
11	75880000	76040000
11	125540000	125740000
11	92670000	92810000
11	33180000	33350000
11	75110000	75270000
11	58410000	58590000
11	73130000	73380000
11	47880000	48160000
11	44110000	44560000
11	19580000	19760000
11	76070000	76400000
11	65430000	65610000
11	32970000	33120000
11	20190000	20370000
11	86160000	86310000
11	108340000	108530000
11	65120000	65290000
11	102220000	102530000
11	57100000	57410000
11	67380000	67560000
11	112150000	112440000
11	13780000	14260000
11	126580000	126960000
11	63950000	64120000
11	12060000	12300000
11	117670000	117930000
11	99000000	99630000
11	16790000	17090000
11	47180000	47420000
11	13220000	13380000
11	113170000	113380000
11	45860000	46360000
11	134000000	134140000
11	34940000	35200000
11	73660000	73920000
11	61930000	62120000
11	27190000	27330000
11	105750000	105940000
11	125030000	125270000
11	7870000	8010000
11	2550000	2910000
11	19330000	19560000
11	34380000	34510000
11	124820000	125010000
11	12970000	13200000
11	43320000	43470000
11	6390000	6730000
11	17750000	18000000
11	7110000	7460000
11	118060000	118220000
11	68360000	68840000
11	43040000	43300000
11	107130000	107380000
11	76430000	76640000
11	12690000	12920000
11	118920000	119200000
11	65630000	65770000
11	8630000	8980000
11	118240000	118440000
11	117290000	117650000
11	120020000	120170000
11	71720000	71930000
11	72570000	72840000
11	44950000	45120000
11	84080000	84250000
11	17230000	17400000
11	126140000	126300000
11	36310000	36660000
11	34530000	34920000
11	64540000	64860000
11	34170000	34510000
11	10410000	10760000
11	74320000	74580000
11	130070000	130270000
11	17400000	17580000
11	74750000	74970000
11	15090000	15240000
11	74160000	74300000
11	123160000	123370000
11	120380000	120550000
11	16950000	17090000
11	70800000	71160000
11	9260000	9470000
11	63240000	63390000
11	18290000	18670000
11	56860000	57030000
11	13500000	13760000
11	35240000	35430000
11	63570000	63740000
11	44940000	45350000
11	111140000	111360000
11	107440000	107590000
11	66610000	67010000
11	46890000	47160000
11	66450000	66600000
11	120850000	121070000
11	19780000	19930000
11	99730000	100350000
11	12350000	12600000
11	16800000	16930000
11	109810000	110030000
11	61710000	61850000
11	8710000	8830000
11	2940000	3080000
11	74980000	75100000
11	1710000	1880000
11	14550000	14790000
11	540000	800000
11	43650000	43880000
11	73450000	73620000
11	45370000	45800000
11	101970000	102140000
11	128520000	128700000
11	100440000	100800000
11	36310000	36510000
11	6540000	6710000
11	64650000	64850000
11	13790000	13970000
11	6390000	6530000
11	44640000	44930000
11	67770000	67970000
11	45130000	45350000
11	128340000	128500000
11	35850000	36220000
11	46390000	46640000
11	70300000	70610000
11	65820000	66020000
11	44120000	44280000
11	71950000	72140000
11	2720000	2900000
11	35630000	35840000
11	9630000	9770000
11	44310000	44550000
11	66840000	67000000
11	117100000	117260000
11	43900000	44080000
11	6240000	6380000
11	37970000	38200000
11	70050000	70260000
11	9000000	9150000
11	9780000	10000000
11	68230000	68360000
11	47430000	47610000
11	107630000	107780000
11	8210000	8390000
11	68680000	68850000
11	37440000	37620000
11	17600000	17740000
11	66610000	66810000
11	68020000	68220000
11	64950000	65110000
11	70630000	70790000
12	72380000	74920000
12	86340000	88400000
12	82030000	82730000
12	44330000	45330000
12	126020000	127250000
12	46440000	47410000
12	102180000	103210000
12	42870000	43720000
12	25390000	26190000
12	67800000	68400000
12	76010000	76420000
12	18580000	19420000
12	8830000	9190000
12	99420000	100150000
12	79060000	79390000
12	59270000	59500000
12	132310000	132570000
12	56520000	57020000
12	42540000	42790000
12	31800000	32480000
12	96400000	96930000
12	51800000	52260000
12	101260000	101710000
12	56100000	56490000
12	10380000	10880000
12	53420000	53840000
12	52760000	53270000
12	19860000	20550000
12	20800000	21350000
12	10990000	11340000
12	104760000	105480000
12	120980000	121690000
12	131400000	132130000
12	85960000	86300000
12	103270000	103940000
12	33550000	34050000
12	55130000	55360000
12	92160000	93050000
12	109020000	109230000
12	16280000	17010000
12	54390000	54600000
12	51200000	51750000
12	85260000	85440000
12	75900000	76420000
12	104570000	104740000
12	64910000	65140000
12	26220000	26860000
12	58150000	58330000
12	47420000	47810000
12	94520000	95340000
12	10380000	10730000
12	105790000	106600000
12	76450000	76870000
12	9890000	10300000
12	12240000	12860000
12	22210000	22600000
12	49670000	49970000
12	79790000	79940000
12	106760000	107340000
12	65280000	65510000
12	109550000	109840000
12	31230000	31420000
12	112280000	112900000
12	1740000	1890000
12	112940000	113610000
12	72000000	72160000
12	48600000	49020000
12	66350000	66510000
12	3190000	3920000
12	69080000	69230000
12	68730000	69070000
12	50870000	51120000
12	27660000	27800000
12	69760000	69980000
12	27560000	27840000
12	117630000	118290000
12	2100000	2890000
12	80320000	80580000
12	54630000	54830000
12	53910000	54080000
12	7350000	7800000
12	104760000	105270000
12	44110000	44280000
12	69250000	69500000
12	14340000	14820000
12	110470000	110870000
12	20980000	21370000
12	89930000	90670000
12	21440000	21830000
12	88490000	88950000
12	95450000	95930000
12	27160000	27470000
12	6150000	6390000
12	62990000	63200000
12	11360000	11650000
12	25550000	26180000
12	93150000	93810000
12	25130000	25300000
12	126550000	127230000
12	530000	670000
12	77000000	77190000
12	78120000	78330000
12	6680000	6970000
12	50470000	50820000
12	67340000	67650000
12	45560000	45800000
12	118600000	118810000
12	96660000	96910000
12	13150000	13390000
12	75720000	75890000
12	133210000	133390000
12	107480000	108020000
12	108310000	108900000
12	65940000	66220000
12	48090000	48230000
12	54150000	54350000
12	123110000	123260000
12	31550000	31790000
12	24990000	25320000
12	116390000	117130000
12	14950000	15160000
12	52530000	52750000
12	34250000	34850000
12	57650000	57840000
12	124820000	125260000
12	57150000	57390000
12	27870000	28090000
12	29660000	30340000
12	17810000	18160000
12	58730000	58940000
12	96960000	97360000
12	65690000	65920000
12	77230000	77400000
12	51440000	51750000
12	7410000	7640000
12	95960000	96240000
12	28110000	28340000
12	14360000	14640000
12	123270000	123730000
12	123750000	124110000
12	22620000	22840000
12	10730000	10900000
12	50570000	50820000
12	110900000	111060000
12	31000000	31190000
12	98450000	98830000
12	93860000	94500000
12	122840000	123010000
12	93880000	94180000
12	64460000	64630000
12	96440000	96610000
12	95480000	95660000
12	101800000	102140000
12	57910000	58130000
12	120550000	120720000
12	79560000	79750000
12	120100000	120530000
12	22990000	23350000
12	70770000	70960000
12	57430000	57620000
12	123300000	123450000
12	3190000	3390000
12	3970000	4410000
12	32510000	32860000
12	30790000	30970000
12	1910000	2070000
12	91360000	91740000
12	89410000	89910000
12	79950000	80130000
12	88980000	89390000
12	3400000	3920000
12	99770000	100060000
12	116410000	116700000
12	109890000	110230000
12	15720000	16020000
12	53440000	53700000
12	112960000	113360000
12	97380000	97730000
12	25350000	25540000
12	71800000	71980000
12	106610000	106750000
12	108070000	108300000
12	107510000	107790000
12	12870000	13080000
12	105530000	105780000
12	111330000	111740000
12	21860000	22170000
12	114410000	115000000
12	52990000	53250000
12	117640000	117830000
12	106130000	106570000
12	11690000	12180000
12	78370000	78520000
12	56880000	57020000
12	21080000	21330000
12	8800000	9040000
12	12510000	12860000
12	12530000	12710000
12	97830000	98090000
12	5180000	5560000
12	25740000	26190000
12	113880000	114360000
12	75510000	75680000
12	48420000	48560000
12	109690000	109850000
12	94930000	95160000
12	1230000	1710000
12	124230000	124490000
12	117140000	117420000
12	94520000	94910000
12	15430000	15670000
12	89430000	89720000
12	9890000	10100000
12	4940000	5120000
12	51200000	51390000
12	31810000	32140000
12	49210000	49420000
12	107840000	108000000
12	5720000	6060000
12	123470000	123660000
12	121730000	121890000
12	118840000	119080000
12	95720000	95930000
12	105810000	106090000
12	132990000	133190000
12	32900000	33080000
12	20580000	20750000
12	32210000	32460000
12	98920000	99090000
12	26240000	26560000
12	680000	850000
12	9230000	9420000
12	119860000	120030000
12	56700000	56870000
12	99110000	99400000
12	19010000	19350000
12	91100000	91330000
12	12220000	12480000
12	45920000	46110000
12	104360000	104520000
12	121920000	122110000
12	130880000	131200000
12	111080000	111300000
12	19460000	19690000
12	116710000	117100000
12	111900000	112120000
12	7980000	8160000
12	113620000	113860000
12	121190000	121430000
12	10140000	10290000
12	13420000	13690000
12	112620000	112830000
12	120360000	120520000
12	24740000	24950000
12	14130000	14310000
12	16600000	16850000
12	116230000	116350000
12	100750000	100940000
12	123900000	124080000
12	125480000	125630000
12	125040000	125250000
12	4460000	4640000
12	108680000	108900000
12	4210000	4380000
12	113410000	113610000
12	125660000	125920000
12	124520000	124790000
12	121020000	121150000
12	3730000	3910000
12	56510000	56670000
12	2940000	3150000
12	26590000	26810000
12	16040000	16210000
12	3410000	3670000
12	118030000	118280000
12	15280000	15420000
12	121470000	121680000
12	18720000	18960000
12	104140000	104320000
12	52770000	52970000
12	30430000	30650000
12	16280000	16520000
12	111430000	111620000
12	7820000	7960000
12	24990000	25110000
12	26840000	27020000
12	29210000	29420000
12	96260000	96420000
12	2140000	2390000
12	1060000	1210000
12	5330000	5550000
12	94520000	94680000
12	5830000	6000000
12	110230000	110370000
13	112010000	113100000
13	19260000	20160000
13	114210000	115100000
13	70100000	71160000
13	72470000	73200000
13	67110000	67810000
13	80970000	81590000
13	113630000	114130000
13	50650000	51640000
13	20740000	21450000
13	39610000	40250000
13	53260000	53720000
13	47390000	48100000
13	46100000	46770000
13	30790000	31660000
13	85460000	86400000
13	27930000	28560000
13	109540000	110430000
13	103520000	104410000
13	40510000	41280000
13	35760000	36380000
13	65040000	65570000
13	42240000	42810000
13	30030000	30690000
13	61190000	61750000
13	77590000	78320000
13	52380000	52720000
13	79950000	80130000
13	48610000	49160000
13	108930000	109540000
13	80200000	80930000
13	104530000	105210000
13	27940000	28400000
13	73610000	74290000
13	24570000	24800000
13	95310000	95830000
13	102570000	103210000
13	36900000	37560000
13	40610000	41260000
13	76440000	77050000
13	45580000	45880000
13	26140000	26660000
13	101780000	102420000
13	73360000	74290000
13	47400000	47980000
13	101230000	101750000
13	97680000	98020000
13	37650000	38170000
13	43650000	44410000
13	25310000	25550000
13	107240000	107780000
13	100560000	101180000
13	20280000	20570000
13	29390000	29960000
13	38190000	38610000
13	99500000	100080000
13	109790000	109910000
13	30050000	30310000
13	27540000	27910000
13	47060000	47330000
13	28400000	28560000
13	51970000	52370000
13	38690000	39100000
13	24020000	24460000
13	96140000	96500000
13	65080000	65380000
13	98090000	98450000
13	95830000	96050000
13	110860000	111080000
13	77070000	77550000
13	103220000	103500000
13	21810000	22070000
13	26750000	26990000
13	99090000	99330000
13	41630000	41910000
13	44470000	45020000
13	78340000	78690000
13	108960000	109180000
13	39980000	40190000
13	49390000	49810000
13	75870000	76150000
13	32080000	32390000
13	96280000	96490000
13	74370000	74620000
13	45050000	45530000
13	76240000	76440000
13	41950000	42230000
13	21060000	21420000
13	42470000	42690000
13	109610000	109780000
13	25140000	25300000
13	101790000	102170000
13	106560000	107190000
13	45910000	46090000
13	100610000	100890000
13	73360000	73620000
13	34490000	34660000
13	113280000	113540000
13	80550000	80910000
13	44470000	44610000
13	32460000	32880000
13	50220000	50510000
13	33690000	34110000
13	49850000	50190000
13	110440000	110770000
13	20760000	21040000
13	48650000	48850000
13	40290000	40530000
13	98760000	99010000
13	59950000	60230000
13	97870000	98010000
13	36540000	36840000
13	28620000	28880000
13	34120000	34320000
13	95070000	95280000
13	49160000	49350000
13	50660000	51010000
13	42890000	43150000
13	31790000	31990000
13	27290000	27510000
13	77600000	77860000
13	22180000	22380000
13	107850000	108030000
13	71850000	72060000
13	113850000	114100000
13	31220000	31430000
13	79570000	79830000
13	103520000	103800000
13	21510000	21740000
13	60250000	60490000
13	51690000	51890000
13	52160000	52360000
13	30380000	30680000
13	28910000	29210000
13	43180000	43450000
13	48890000	49150000
13	27060000	27270000
13	84910000	85090000
13	95610000	95810000
13	49540000	49710000
13	113140000	113260000
13	111550000	111700000
13	38200000	38370000
13	46130000	46330000
13	103840000	104060000
13	41490000	41620000
13	100310000	100540000
13	100920000	101160000
13	39620000	39840000
13	102180000	102410000
13	74700000	74880000
13	33320000	33620000
13	43530000	43660000
13	61020000	61190000
13	111100000	111310000
13	36390000	36530000
13	102590000	102740000
13	25960000	26100000
13	51150000	51390000
13	21070000	21280000
13	28090000	28280000
13	51500000	51660000
13	53420000	53550000
13	99510000	99680000
13	111720000	111920000
13	113580000	113790000
13	111370000	111510000
13	110260000	110420000
13	97470000	97620000
13	31450000	31600000
13	40630000	40810000
13	46360000	46510000
13	76450000	76590000
14	40380000	42080000
14	62620000	63760000
14	30030000	30680000
14	102830000	103810000
14	87400000	88370000
14	101290000	102140000
14	101130000	102140000
14	99910000	100700000
14	68340000	69300000
14	76130000	77160000
14	33040000	33830000
14	29210000	30000000
14	58010000	58550000
14	65560000	66300000
14	24780000	24910000
14	61750000	62300000
14	54900000	55360000
14	61060000	61730000
14	35030000	35900000
14	86580000	87370000
14	78300000	79220000
14	70040000	70230000
14	28630000	29110000
14	57540000	57880000
14	24100000	24410000
14	25180000	25640000
14	31330000	31880000
14	77330000	77560000
14	104030000	104510000
14	106680000	107280000
14	81680000	81940000
14	50590000	51350000
14	79370000	80390000
14	29480000	30000000
14	53870000	54850000
14	75590000	75760000
14	59070000	59490000
14	95890000	96010000
14	61740000	61910000
14	34300000	34800000
14	105190000	105990000
14	56980000	57520000
14	60010000	60390000
14	21660000	21970000
14	99930000	100390000
14	35740000	35880000
14	80500000	81350000
14	64970000	65400000
14	99950000	100140000
14	50690000	51350000
14	87520000	88120000
14	61930000	62220000
14	60780000	61040000
14	80670000	81340000
14	64250000	64790000
14	72950000	73410000
14	88200000	88380000
14	97470000	98450000
14	39530000	39900000
14	72340000	72890000
14	23020000	23380000
14	56160000	56940000
14	36330000	37000000
14	21160000	21600000
14	55010000	55270000
14	50060000	50300000
14	32730000	32980000
14	69320000	69570000
14	76490000	77130000
14	59590000	59940000
14	75590000	76120000
14	89500000	90400000
14	67850000	68270000
14	53270000	53450000
14	71580000	72210000
14	50320000	50570000
14	67610000	67820000
14	20780000	21080000
14	37100000	37660000
14	45350000	45730000
14	34870000	35020000
14	95550000	96000000
14	105830000	105990000
14	71040000	71490000
14	57650000	57870000
14	37700000	38350000
14	42570000	42710000
14	21440000	21600000
14	58670000	58920000
14	62330000	62590000
14	96500000	96950000
14	57140000	57520000
14	39950000	40370000
14	93380000	93620000
14	51730000	52160000
14	104600000	105100000
14	52750000	52940000
14	60510000	60700000
14	67880000	68030000
14	37410000	37610000
14	70280000	70530000
14	85590000	86030000
14	31630000	31830000
14	86150000	86520000
14	55900000	56140000
14	104190000	104510000
14	75340000	75570000
14	78300000	78900000
14	87680000	88100000
14	97020000	97390000
14	73610000	73940000
14	63820000	64100000
14	96760000	96960000
14	61490000	61720000
14	104020000	104180000
14	20790000	20940000
14	24920000	25150000
14	34300000	34580000
14	82030000	82420000
14	92630000	93160000
14	33910000	34260000
14	91980000	92430000
14	100160000	100370000
14	35030000	35480000
14	54640000	54810000
14	39620000	39790000
14	96540000	96740000
14	37700000	38040000
14	88410000	88840000
14	35910000	36260000
14	61090000	61430000
14	99250000	99730000
14	69660000	69930000
14	103530000	103780000
14	65620000	65870000
14	68340000	68700000
14	102420000	102560000
14	90750000	91210000
14	64480000	64780000
14	74160000	74350000
14	73950000	74130000
14	100420000	100670000
14	96020000	96460000
14	35510000	35890000
14	102160000	102400000
14	51420000	51690000
14	55490000	55650000
14	102840000	103400000
14	54430000	54820000
14	31370000	31580000
14	75040000	75300000
14	23030000	23220000
14	52450000	52610000
14	72970000	73170000
14	50770000	51000000
14	89080000	89480000
14	76140000	76470000
14	21160000	21430000
14	90430000	90710000
14	90200000	90380000
14	101750000	102100000
14	94110000	94370000
14	51010000	51330000
14	23400000	23550000
14	68050000	68180000
14	68870000	69280000
14	91350000	91610000
14	39160000	39480000
14	95570000	95870000
14	93660000	93810000
14	28910000	29080000
14	64800000	64960000
14	77580000	77780000
14	100850000	101110000
14	101130000	101310000
14	75780000	76110000
14	49750000	50030000
14	81420000	81650000
14	52250000	52440000
14	77910000	78210000
14	23580000	23700000
14	78460000	78880000
14	102570000	102820000
14	97040000	97210000
14	99750000	99910000
14	35080000	35230000
14	22850000	23000000
14	80510000	80670000
14	53110000	53250000
14	76510000	76850000
14	65250000	65370000
14	73760000	73940000
14	89080000	89370000
14	22580000	22840000
14	88480000	88640000
14	48700000	48870000
14	56180000	56520000
14	76880000	77130000
14	58370000	58530000
14	92920000	93150000
14	74780000	74940000
14	71280000	71440000
14	101370000	101550000
14	95170000	95510000
14	93810000	94070000
14	32540000	32690000
14	55670000	55870000
14	103790000	103950000
14	92450000	92620000
14	32320000	32520000
14	65880000	66110000
14	96020000	96260000
14	103160000	103380000
14	85160000	85430000
14	73200000	73380000
14	64270000	64450000
14	77150000	77310000
14	105660000	105820000
14	59110000	59290000
14	98840000	99140000
14	74560000	74740000
14	36350000	36530000
14	54480000	54630000
14	94990000	95150000
14	102970000	103140000
14	35580000	35720000
14	58180000	58340000
14	94740000	94890000
14	78310000	78450000
15	29100000	29940000
15	54220000	55450000
15	27120000	28300000
15	37500000	38190000
15	93310000	93570000
15	98980000	99620000
15	34900000	35130000
15	73070000	73490000
15	49730000	50290000
15	77290000	77830000
15	68520000	69220000
15	84310000	84640000
15	34890000	35240000
15	75340000	75490000
15	97850000	98290000
15	72490000	72890000
15	74410000	74550000
15	92630000	93280000
15	22850000	23000000
15	87510000	88170000
15	32920000	33460000
15	85830000	86040000
15	99190000	99620000
15	65020000	65590000
15	69760000	70920000
15	58490000	59170000
15	101830000	102200000
15	45990000	46590000
15	32920000	33290000
15	85490000	85720000
15	50720000	51200000
15	90270000	90430000
15	61480000	62130000
15	64450000	64980000
15	89590000	89730000
15	75650000	75980000
15	99790000	100290000
15	35790000	36310000
15	77410000	77830000
15	80710000	81290000
15	31150000	31440000
15	38260000	38700000
15	100440000	100860000
15	60630000	60810000
15	65740000	66180000
15	59810000	59960000
15	68840000	68980000
15	44150000	44530000
15	79180000	79510000
15	98440000	98720000
15	63900000	64380000
15	51240000	51700000
15	60850000	61390000
15	91580000	91810000
15	41730000	42220000
15	90210000	90650000
15	33510000	34000000
15	29960000	30360000
15	66590000	66820000
15	81350000	81690000
15	78230000	78540000
15	64460000	64660000
15	64190000	64360000
15	59980000	60620000
15	78590000	78720000
15	101150000	101410000
15	40310000	40490000
15	57620000	57830000
15	31490000	31780000
15	25540000	25690000
15	46050000	46310000
15	68830000	69210000
15	55470000	55730000
15	58020000	58470000
15	89440000	89560000
15	73830000	74000000
15	59450000	59790000
15	52540000	53030000
15	86250000	86390000
15	91090000	91470000
15	83210000	83680000
15	94700000	94880000
15	34370000	34510000
15	53750000	54020000
15	83500000	83670000
15	78880000	79130000
15	71250000	71730000
15	74910000	75240000
15	69320000	69700000
15	67220000	67490000
15	101550000	101800000
15	81560000	81700000
15	56540000	56740000
15	67730000	68120000
15	53060000	53490000
15	83910000	84090000
15	99630000	99780000
15	89870000	90120000
15	48630000	49110000
15	52250000	52470000
15	74650000	74900000
15	90670000	90810000
15	78240000	78390000
15	51900000	52220000
15	80150000	80500000
15	77860000	78170000
15	74910000	75050000
15	37170000	37430000
15	44860000	45080000
15	48300000	48590000
15	78400000	78550000
15	95180000	95540000
15	43030000	43230000
15	89000000	89180000
15	39880000	40060000
15	45740000	45920000
15	56180000	56390000
15	70960000	71180000
15	86400000	86680000
15	65310000	65590000
15	93600000	93820000
15	92390000	92620000
15	68140000	68480000
15	52850000	53030000
15	65920000	66160000
15	68570000	68800000
15	50960000	51190000
15	41190000	41650000
15	86760000	86990000
15	76100000	76430000
15	79180000	79310000
15	90840000	91030000
15	81080000	81280000
15	66860000	67160000
15	49130000	49430000
15	72120000	72440000
15	62140000	62350000
15	98840000	98960000
15	99190000	99450000
15	75060000	75240000
15	39460000	39860000
15	76470000	76660000
15	81350000	81550000
15	38740000	38980000
15	71740000	72090000
15	42250000	42440000
15	59980000	60220000
15	58510000	58890000
15	91840000	92170000
15	80720000	81060000
15	46350000	46570000
15	101840000	102010000
15	49490000	49710000
15	52080000	52200000
15	69010000	69170000
15	80820000	81060000
15	48000000	48270000
15	66210000	66570000
15	36810000	37090000
15	40070000	40280000
15	61960000	62120000
15	99030000	99180000
15	49140000	49280000
15	45400000	45690000
15	63570000	63730000
15	34090000	34310000
15	44190000	44350000
15	59530000	59690000
15	102030000	102190000
15	59230000	59410000
15	83710000	83880000
15	33300000	33460000
15	69760000	70260000
15	90440000	90640000
15	89200000	89380000
15	79640000	79880000
15	62630000	62990000
15	41720000	42050000
15	51440000	51690000
15	57190000	57420000
15	74030000	74200000
15	65010000	65250000
15	50440000	50600000
15	64700000	64960000
15	63040000	63380000
15	55780000	55930000
15	80320000	80490000
15	62370000	62590000
15	41030000	41180000
15	68340000	68480000
15	42550000	42760000
15	99470000	99610000
15	79330000	79510000
15	63750000	63890000
15	57840000	58000000
15	41840000	42050000
15	44360000	44510000
15	40580000	40840000
15	42050000	42220000
15	63400000	63560000
15	65730000	65900000
15	58030000	58150000
16	21580000	22310000
16	33350000	34020000
16	16850000	18160000
16	6730000	8410000
16	34170000	35270000
16	59430000	60340000
16	88500000	88630000
16	65160000	66350000
16	30440000	30660000
16	22740000	23040000
16	46610000	46970000
16	72500000	73260000
16	52190000	52990000
16	70660000	70830000
16	14380000	14640000
16	3560000	4450000
16	15950000	16170000
16	75210000	75670000
16	3100000	3550000
16	12980000	13930000
16	77250000	78070000
16	27570000	28090000
16	23790000	24510000
16	2020000	2230000
16	19090000	19530000
16	2730000	3000000
16	15920000	16290000
16	8760000	8880000
16	89760000	90150000
16	11990000	12170000
16	48700000	49390000
16	19920000	20400000
16	19090000	19390000
16	19390000	19530000
16	48370000	48670000
16	85840000	86560000
16	51130000	51790000
16	74700000	75200000
16	10600000	11020000
16	20800000	21110000
16	69170000	69330000
16	55740000	55900000
16	74500000	74660000
16	4530000	5140000
16	87780000	87940000
16	75230000	75450000
16	66920000	67500000
16	55490000	55730000
16	83970000	84520000
16	2320000	2480000
16	85840000	86050000
16	83480000	83630000
16	5180000	5660000
16	81910000	82270000
16	67520000	68270000
16	66380000	66900000
16	9690000	10330000
16	87420000	87700000
16	53060000	53540000
16	27160000	27420000
16	57330000	57470000
16	66970000	67210000
16	86080000	86560000
16	58530000	58790000
16	24550000	24810000
16	78140000	78300000
16	83940000	84100000
16	89620000	89760000
16	74980000	75180000
16	70360000	70550000
16	10840000	11030000
16	14000000	14320000
16	83650000	83910000
16	85130000	85720000
16	74010000	74310000
16	8990000	9230000
16	6270000	6700000
16	61690000	62160000
16	57560000	58050000
16	58830000	59220000
16	68920000	69150000
16	25280000	25750000
16	55950000	56380000
16	57570000	57770000
16	86580000	87330000
16	58360000	58520000
16	86620000	86760000
16	81400000	81760000
16	1850000	2000000
16	11050000	11350000
16	1360000	1830000
16	69380000	69730000
16	30710000	30950000
16	19570000	19890000
16	3230000	3510000
16	56460000	56780000
16	68550000	68870000
16	71670000	72050000
16	77700000	78040000
16	22710000	22870000
16	47740000	48220000
16	84540000	85050000
16	74720000	74900000
16	11480000	11810000
16	4740000	5140000
16	89350000	89590000
16	57790000	58040000
16	5730000	6210000
16	86340000	86550000
16	23730000	24040000
16	49430000	49960000
16	30970000	31190000
16	31210000	31460000
16	75900000	76260000
16	10610000	10820000
16	50400000	50850000
16	24050000	24510000
16	81040000	81380000
16	88880000	89270000
16	50050000	50390000
16	77260000	77620000
16	76690000	77210000
16	85440000	85670000
16	67520000	67700000
16	59800000	60260000
16	84790000	84990000
16	65740000	66320000
16	85690000	85830000
16	73590000	73930000
16	79980000	80480000
16	23180000	23440000
16	80550000	80900000
16	860000	1260000
16	55000000	55350000
16	66370000	66630000
16	67280000	67500000
16	68730000	68870000
16	10350000	10590000
16	51800000	52030000
16	69810000	69970000
16	75470000	75650000
16	72210000	72490000
16	72520000	72800000
16	68120000	68260000
16	3070000	3220000
16	87100000	87330000
16	31520000	31690000
16	72850000	73230000
16	19710000	19860000
16	11820000	11970000
16	12610000	12960000
16	84530000	84760000
16	5780000	6060000
16	53330000	53540000
16	23470000	23690000
16	29860000	30030000
16	4300000	4470000
16	71420000	71560000
16	54760000	54990000
16	6070000	6230000
16	60550000	60780000
16	89790000	89970000
16	53980000	54220000
16	84240000	84510000
16	9780000	10050000
16	53730000	53950000
16	250000	410000
16	12180000	12530000
16	3720000	3940000
16	11490000	11610000
16	79600000	79910000
16	61970000	62130000
16	50700000	50840000
16	10110000	10300000
16	85130000	85300000
16	13300000	13540000
16	580000	700000
16	56880000	57200000
16	430000	560000
16	11640000	11800000
16	68410000	68550000
16	56220000	56350000
16	19200000	19380000
16	3550000	3700000
16	78920000	79090000
16	56980000	57160000
16	82630000	82790000
16	86910000	87050000
17	10660000	11840000
17	57790000	57940000
17	77750000	77970000
17	58780000	59470000
17	77140000	77350000
17	15730000	15910000
17	55910000	56060000
17	2980000	3430000
17	48830000	49240000
17	61950000	62210000
17	80700000	81100000
17	39700000	39820000
17	70590000	71200000
17	44080000	44250000
17	53960000	54560000
17	72200000	72890000
17	41420000	41570000
17	20020000	20200000
17	21200000	21480000
17	29740000	30180000
17	5410000	6340000
17	61930000	62390000
17	66140000	66500000
17	12130000	12750000
17	14320000	14950000
17	6350000	6920000
17	62930000	63200000
17	43700000	44000000
17	34960000	35410000
17	30780000	31240000
17	33920000	34180000
17	39010000	39470000
17	43330000	43490000
17	33280000	33450000
17	29230000	29700000
17	56380000	56540000
17	46210000	46700000
17	55910000	56220000
17	55190000	55840000
17	70550000	70710000
17	16880000	17140000
17	38570000	38750000
17	8810000	9460000
17	49840000	50400000
17	29710000	29860000
17	72210000	72730000
17	56590000	57090000
17	18090000	18260000
17	57350000	57580000
17	42840000	42960000
17	2690000	2930000
17	17570000	17990000
17	68200000	68600000
17	67530000	68140000
17	59480000	59660000
17	33470000	33890000
17	76080000	76430000
17	7120000	7480000
17	70720000	71180000
17	36640000	36850000
17	29870000	30170000
17	53050000	53390000
17	47920000	48080000
17	63610000	63970000
17	53430000	53590000
17	15130000	15410000
17	76810000	77000000
17	47360000	47860000
17	42280000	42430000
17	51570000	51840000
17	6930000	7100000
17	39850000	40060000
17	650000	900000
[truncated: 3,857 more rows]

## Sheet: HK1_R1
Supplementary Table S4: TADs called by Arrowhead from Hi-C libraries
#chr	x1	x2
9	104530000	123150000
9	2850000	106670000
9	75810000	3730000
9	15800000	77240000
9	119460000	17030000
9	103410000	120230000
9	92900000	104130000
9	93650000	93540000
9	135260000	94500000
9	89130000	135860000
9	32360000	89500000
9	33930000	32570000
9	21210000	34310000
9	17130000	21460000
9	74900000	17460000
9	123460000	75340000
9	97400000	123860000
9	99090000	97890000
9	31470000	99440000
9	32580000	31790000
9	133340000	32970000
9	79380000	133550000
9	35120000	79760000
9	115160000	35460000
9	460000	115580000
9	96770000	810000
9	124850000	96970000
9	86540000	125210000
9	132860000	86930000
9	34660000	132990000
9	103070000	35050000
9	19040000	103360000
9	72940000	19460000
9	33020000	73220000
9	78500000	33270000
9	19470000	78930000
9	137200000	19890000
9	71640000	137340000
9	134420000	71860000
9	14540000	134620000
9	79380000	14790000
9	127640000	79640000
9	17520000	128140000
9	124850000	17790000
9	94860000	125110000
9	19920000	95080000
9	79050000	20360000
9	3740000	79320000
9	31110000	3970000
9	37900000	31320000
9	124290000	38070000
9	135900000	124820000
9	37480000	136040000
9	88640000	37740000
9	18230000	88870000
9	136630000	18670000
9	100440000	136870000
9	125230000	100660000
9	6050000	125570000
9	91220000	6330000
9	26110000	91610000
9	21520000	26360000
9	72010000	21790000
9	27320000	72210000
9	139380000	27550000
9	117860000	139550000
9	12690000	118140000
9	35590000	12890000
9	134640000	35910000
9	14070000	135130000
9	34380000	14360000
9	131580000	34630000
9	89970000	131800000
9	123960000	90260000
9	96430000	124200000
9	102020000	96730000
9	118340000	102340000
9	131880000	118600000
9	81420000	132380000
9	95410000	81740000
9	4750000	95560000
9	72550000	5000000
9	91980000	72860000
9	6390000	92180000
9	125820000	6700000
9	136060000	126130000
9	37120000	136190000
9	110280000	37350000
9	117790000	110610000
9	116850000	118290000
9	130210000	117090000
9	107530000	130680000
9	4380000	107910000
9	133570000	4660000
9	870000	133920000
9	91630000	1010000
9	20620000	91920000
9	101050000	20930000
9	114490000	101550000
9	104150000	114830000
9	98030000	104340000
9	72280000	98290000
9	27020000	72540000
9	115160000	27280000
9	111880000	115470000
9	125590000	112280000
9	132390000	125780000
9	90280000	132570000
9	95090000	90510000
9	139950000	95380000
9	140180000	140160000
9	101590000	140430000
9	117460000	101920000
9	79780000	117770000
9	100820000	80010000
9	109930000	101040000
9	74650000	110100000
9	126810000	74880000
9	116190000	127100000
9	80080000	116430000
9	87010000	80340000
9	74940000	87250000
9	100210000	75210000
9	23570000	100380000
9	22020000	23830000
9	5830000	22240000
9	75460000	6030000
9	89240000	75660000
9	112640000	89500000
9	80390000	112920000
9	117150000	80660000
9	114690000	117410000
9	114850000	114830000
9	129680000	115130000
9	118640000	129960000
9	124620000	118920000
9	133570000	124780000
9	127950000	133730000
9	21810000	128140000
9	94510000	21980000
9	116480000	94760000
9	38100000	116810000
9	4050000	38310000
9	128230000	4360000
9	15190000	128520000
9	127670000	15420000
9	15430000	127910000
9	36210000	15610000
9	36860000	36390000
9	137360000	37020000
9	22270000	137570000
9	112980000	22460000
9	74420000	113170000
9	132600000	74630000
9	129970000	132840000
9	3740000	130190000
9	101750000	4370000
9	95910000	101900000
9	113390000	96070000
9	123510000	113670000
9	137970000	123700000
9	107930000	138290000
9	130690000	108170000
9	5430000	130870000
9	610000	5590000
9	73490000	750000
9	135280000	73630000
9	127340000	135470000
9	35600000	127490000
9	112310000	35750000
9	114520000	112590000
9	127150000	114670000
9	131930000	127300000
9	139670000	132090000
9	20180000	139910000
9	132130000	20330000
9	140530000	132370000
9	134220000	140730000
9	134820000	134400000
9	130500000	134970000
9	112150000	130680000
10	108040000	112290000
10	65750000	111540000
10	82740000	69380000
10	7870000	85670000
10	130010000	9350000
10	3220000	133670000
10	44080000	4840000
10	31000000	45570000
10	52700000	31830000
10	35890000	53970000
10	132020000	37120000
10	117460000	133370000
10	12270000	118230000
10	28920000	13150000
10	106690000	29630000
10	127530000	107520000
10	126680000	128280000
10	77100000	127390000
10	64920000	77790000
10	122690000	65530000
10	54080000	123370000
10	26640000	54350000
10	124800000	26850000
10	101490000	125280000
10	103910000	101830000
10	92640000	104400000
10	125920000	93030000
10	61010000	126070000
10	11530000	61350000
10	122100000	11790000
10	890000	122500000
10	5470000	1110000
10	30670000	5710000
10	79580000	30850000
10	43050000	79790000
10	23590000	43290000
10	74120000	23780000
10	89740000	74640000
10	111880000	90230000
10	50800000	112040000
10	14250000	50970000
10	125330000	14510000
10	97750000	125720000
10	106030000	98100000
10	91550000	106390000
10	77820000	91890000
10	115540000	78310000
10	102920000	115870000
10	30290000	103320000
10	95070000	30570000
10	13830000	95270000
10	93810000	14220000
10	99500000	94210000
10	121320000	99830000
10	6460000	121660000
10	16870000	6690000
10	112060000	17290000
10	91000000	112320000
10	118570000	91160000
10	78910000	118930000
10	99160000	79470000
10	16610000	99430000
10	120930000	16830000
10	32120000	121270000
10	75580000	32300000
10	48300000	75860000
10	2930000	48660000
10	129670000	3110000
10	70500000	129890000
10	28520000	70710000
10	134660000	28670000
10	76440000	135040000
10	73850000	76860000
10	82130000	74110000
10	101110000	82300000
10	90770000	101370000
10	93510000	90970000
10	71920000	93740000
10	120320000	72170000
10	73060000	120780000
10	13670000	73580000
10	86110000	13820000
10	91170000	86300000
10	87820000	91450000
10	11860000	88130000
10	101610000	12040000
10	102050000	101860000
10	22870000	102280000
10	280000	23010000
10	100220000	480000
10	96940000	100440000
10	10770000	97120000
10	60540000	10970000
10	114970000	60700000
10	62220000	115360000
10	116610000	62500000
10	106150000	116890000
10	95640000	106380000
10	99500000	96030000
10	70970000	99660000
10	97430000	71160000
10	62560000	97630000
10	61850000	62840000
10	111620000	61970000
10	32520000	111860000
10	64350000	32660000
10	21570000	64570000
10	72670000	21770000
10	13400000	73040000
10	93220000	13600000
10	88440000	93500000
10	60310000	88670000
10	118960000	60490000
10	93020000	119230000
10	116300000	93180000
10	43330000	116580000
10	54370000	43610000
10	17320000	54540000
10	81120000	17470000
10	124030000	81260000
10	94830000	124190000
10	103580000	95050000
10	32340000	103800000
10	50590000	32490000
10	70740000	50740000
10	90570000	70930000
10	102310000	90710000
10	90370000	102640000
10	104850000	90570000
10	75260000	105110000
10	95290000	75420000
10	98790000	95450000
10	103930000	98980000
10	120790000	104140000
10	72310000	120920000
10	119250000	72520000
10	126210000	119510000
10	103340000	126430000
10	61610000	103540000
10	97180000	61800000
10	97960000	97370000
10	114710000	98090000
10	91180000	114890000
10	124550000	91340000
10	70290000	124730000
10	49550000	70470000
10	99990000	49720000
10	116060000	100180000
10	33300000	116210000
10	76860000	33450000
10	105460000	77000000
10	123690000	105630000
10	98130000	123910000
10	94630000	98330000
10	134270000	94800000
10	75580000	134450000
10	98560000	75760000
10	18760000	98740000
10	99670000	18950000
10	104680000	99850000
10	94240000	104830000
10	62020000	94400000
10	73660000	62190000
10	63500000	73830000
10	134460000	63640000
10	80820000	134610000
10	73850000	80960000
10	120040000	73970000
11	27580000	120160000
11	62660000	29380000
11	84440000	63510000
11	121520000	85270000
11	30300000	122400000
11	126190000	30950000
11	134200000	127060000
11	130890000	134890000
11	68860000	131540000
11	110330000	69470000
11	119340000	111140000
11	94880000	120010000
11	15820000	95490000
11	110460000	16650000
11	95550000	111120000
11	18090000	96160000
11	9620000	18780000
11	124260000	10390000
11	75640000	124470000
11	131760000	75840000
11	116730000	132030000
11	122980000	116970000
11	8200000	123130000
11	3870000	8590000
11	85370000	4100000
11	100910000	85530000
11	102570000	101530000
11	1660000	102920000
11	61560000	2020000
11	129790000	61870000
11	69780000	130010000
11	122440000	69930000
11	111450000	122680000
11	44120000	111660000
11	57100000	44570000
11	65420000	57410000
11	124490000	65770000
11	13780000	124710000
11	35480000	14260000
11	110060000	36300000
11	47440000	110300000
11	5120000	47860000
11	112150000	5420000
11	34940000	112430000
11	120200000	35430000
11	85730000	120350000
11	69780000	85950000
11	103190000	70040000
11	102200000	103500000
11	10810000	102530000
11	19080000	10950000
11	122730000	19280000
11	75870000	122910000
11	125030000	76040000
11	72560000	125270000
11	32050000	72840000
11	63760000	32200000
11	121280000	63920000
11	71720000	121460000
11	73140000	71930000
11	61210000	73390000
11	113170000	61510000
11	14280000	113400000
11	62150000	14520000
11	105750000	62320000
11	117670000	105940000
11	45930000	117930000
11	33180000	46360000
11	43040000	33350000
11	73660000	43300000
11	129630000	73890000
11	99000000	129770000
11	82410000	99630000
11	9170000	82580000
11	870000	9510000
11	57430000	1050000
11	20190000	57590000
11	19970000	20370000
11	124820000	20150000
11	93390000	125010000
11	64210000	93550000
11	7520000	64500000
11	19330000	7710000
11	61930000	19560000
11	2200000	62130000
11	107150000	2440000
11	19580000	107380000
11	44940000	19760000
11	76430000	45350000
11	16780000	76630000
11	130070000	17090000
11	128520000	130270000
11	63950000	128700000
11	36310000	64120000
11	5490000	36660000
11	13500000	5730000
11	47880000	13750000
11	2550000	48160000
11	32970000	2910000
11	6390000	33120000
11	17740000	6730000
11	8630000	18000000
11	12000000	8980000
11	27190000	12300000
11	34940000	27330000
11	109810000	35210000
11	45370000	110020000
11	10410000	45800000
11	118060000	10760000
11	12690000	118220000
11	34530000	12920000
11	74160000	34920000
11	17400000	74300000
11	63570000	17560000
11	66610000	63730000
11	68360000	66990000
11	13210000	68830000
11	65430000	13400000
11	46880000	65610000
11	12970000	47160000
11	34170000	13190000
11	47180000	34510000
11	65630000	47390000
11	65120000	65770000
11	64540000	65280000
11	43660000	64860000
11	106210000	43880000
11	17240000	106390000
11	70800000	17380000
11	16950000	71160000
11	113020000	17090000
11	19780000	113150000
11	67770000	19930000
11	15100000	67980000
11	44950000	15240000
11	34180000	45120000
11	44640000	34370000
11	100430000	44930000
11	6550000	100800000
11	66450000	6710000
11	45130000	66600000
11	35250000	45350000
11	34380000	35430000
11	540000	34510000
11	44120000	810000
11	36310000	44280000
11	35620000	36510000
11	65820000	35840000
11	44300000	66020000
11	6240000	44550000
11	37440000	6380000
11	8710000	37640000
11	46410000	8830000
11	70300000	46570000
11	66840000	70610000
11	9030000	67000000
11	70050000	9150000
11	47450000	70270000
11	66620000	47610000
11	68020000	66810000
11	68230000	68220000
11	64950000	68360000
11	68680000	65100000
11	70650000	68850000
12	54880000	70790000
12	78560000	56090000
12	46380000	79580000
12	44340000	48060000
12	22860000	45330000
12	45500000	24990000
12	70260000	46330000
12	46450000	70980000
12	42870000	47410000
12	75060000	43730000
12	17040000	75710000
12	91760000	18230000
12	32910000	93060000
12	47420000	34200000
12	67740000	48040000
12	19850000	68390000
12	103270000	20560000
12	131400000	103940000
12	16310000	132130000
12	89930000	16980000
12	29650000	90670000
12	25560000	30330000
12	109020000	26180000
12	80330000	109240000
12	2130000	80590000
12	132310000	2790000
12	97040000	132550000
12	27160000	97360000
12	64930000	27430000
12	44120000	65090000
12	11420000	44270000
12	110480000	11640000
12	122730000	110870000
12	104570000	122980000
12	54400000	104730000
12	75720000	54590000
12	65280000	75890000
12	49670000	65500000
12	22220000	49960000
12	76540000	22560000
12	66360000	76740000
12	69080000	66500000
12	94910000	69230000
12	93320000	95300000
12	120100000	93800000
12	10410000	120530000
12	58730000	10730000
12	25010000	58930000
12	108310000	25320000
12	109550000	108900000
12	133210000	109840000
12	78120000	133400000
12	97380000	78330000
12	69760000	97720000
12	114410000	69980000
12	107480000	114950000
12	79950000	108020000
12	93870000	80150000
12	88510000	94500000
12	57150000	88920000
12	65930000	57390000
12	101190000	66220000
12	62990000	101530000
12	50880000	63190000
12	89000000	51080000
12	27650000	89390000
12	123270000	27830000
12	69310000	123730000
12	31000000	69470000
12	6150000	31190000
12	57910000	6390000
12	77000000	58130000
12	53910000	77180000
12	52530000	54070000
12	67400000	52740000
12	89410000	67610000
12	124810000	89900000
12	64450000	125270000
12	57640000	64630000
12	99420000	57840000
12	6680000	99690000
12	1740000	6970000
12	48090000	1890000
12	57440000	48230000
12	95970000	57620000
12	25130000	96240000
12	96660000	25300000
12	123750000	96910000
12	123100000	124110000
12	530000	123260000
12	112960000	670000
12	118600000	113360000
12	111330000	118810000
12	14360000	111750000
12	113880000	14630000
12	31550000	114360000
12	97830000	31790000
12	3400000	98090000
12	13160000	3910000
12	89420000	13390000
12	27870000	89720000
12	14950000	28090000
12	10740000	15150000
12	105550000	10900000
12	3970000	105780000
12	21860000	4410000
12	116400000	22170000
12	54620000	116700000
12	54160000	54790000
12	32510000	54340000
12	22630000	32860000
12	1230000	22830000
12	109900000	1710000
12	120730000	110220000
12	28110000	121010000
12	95480000	28340000
12	110890000	95670000
12	3190000	111060000
12	108100000	3390000
12	11690000	108290000
12	93880000	12180000
12	89730000	94180000
12	30800000	89860000
12	123310000	30970000
12	8800000	123450000
12	9230000	9040000
12	104770000	9420000
12	21090000	105130000
12	1910000	21320000
12	96440000	2070000
12	5170000	96600000
12	11720000	5560000
12	53710000	11960000
12	12870000	53840000
12	105810000	13080000
12	19010000	106090000
12	15730000	19350000
12	31810000	16010000
12	120550000	32130000
12	117140000	120720000
12	117640000	117420000
12	12510000	117840000
12	107520000	12860000
12	116710000	107790000
12	94930000	117100000
12	118840000	95160000
12	25340000	119080000
12	12530000	25540000
12	32210000	12670000
12	106610000	32460000
12	26240000	106750000
12	125660000	26560000
12	123470000	125920000
12	9890000	123670000
12	15510000	10100000
12	12220000	15670000
12	124240000	12480000
12	49240000	124490000
12	104360000	49410000
12	56700000	104520000
12	4940000	56860000
12	113620000	5120000
12	30440000	113790000
12	19460000	30620000
12	13420000	19690000
12	111910000	13700000
12	8000000	112130000
12	132990000	8150000
12	121730000	133180000
12	124520000	121900000
12	101310000	124790000
12	121920000	101500000
12	680000	122110000
12	116210000	860000
12	120370000	116350000
12	121200000	120520000
12	121480000	121420000
12	3410000	121670000
12	56510000	3670000
12	121020000	56670000
12	113420000	121170000
12	125480000	113600000
12	1070000	125630000
12	5830000	1210000
12	2940000	6050000
12	104140000	3150000
12	18760000	104320000
12	26840000	18950000
12	19110000	26990000
12	110230000	19300000
12	5400000	110370000
12	112470000	5540000
13	112010000	112600000
13	114230000	113100000
13	107810000	115100000
13	78690000	108810000
13	80960000	79600000
13	47400000	81590000
13	85460000	48270000
13	36920000	86400000
13	43650000	37550000
13	98090000	44400000
13	73690000	98430000
13	26250000	74290000
13	24580000	26650000
13	24070000	24800000
13	102780000	24460000
13	27940000	103190000
13	77070000	28380000
13	97680000	77540000
13	27610000	98030000
13	21810000	27910000
13	79950000	22080000
13	37650000	80130000
13	51970000	38020000
13	32010000	52370000
13	44550000	32370000
13	38790000	45020000
13	96140000	39070000
13	45580000	96500000
13	47070000	45880000
13	32460000	47330000
13	106560000	32880000
13	80480000	107190000
13	30050000	80920000
13	108960000	30310000
13	28390000	109200000
13	78340000	28570000
13	26750000	78680000
13	101790000	26990000
13	33680000	102170000
13	75900000	34110000
13	41940000	76130000
13	39980000	42230000
13	103230000	40190000
13	25330000	103500000
13	20760000	25500000
13	49860000	21040000
13	50660000	50200000
13	59950000	50990000
13	36540000	60230000
13	74370000	36830000
13	96270000	74610000
13	73370000	96490000
13	41630000	73600000
13	109790000	41890000
13	45050000	109910000
13	95840000	45530000
13	21510000	96050000
13	27280000	21750000
13	28620000	27510000
13	49540000	28880000
13	28910000	49800000
13	110860000	29210000
13	99090000	111080000
13	34490000	99330000
13	77610000	34660000
13	42470000	77860000
13	113280000	42690000
13	100610000	113530000
13	110440000	100890000
13	50230000	110770000
13	51150000	50510000
13	76240000	51480000
13	103530000	76440000
13	42900000	103800000
13	30380000	43140000
13	48660000	30680000
13	34120000	48840000
13	45910000	34330000
13	113850000	46090000
13	44470000	114100000
13	27070000	44600000
13	96640000	27270000
13	43170000	96880000
13	49160000	43450000
13	31240000	49350000
13	103840000	31410000
13	51700000	104020000
13	38190000	51890000
13	95610000	38370000
13	61020000	95810000
13	52160000	61190000
13	111550000	52310000
13	21060000	111700000
13	33360000	21280000
13	74700000	33620000
13	46130000	74880000
13	28100000	46330000
13	53400000	28280000
13	99510000	53550000
13	40610000	99680000
14	40400000	40790000
14	62860000	42040000
14	62620000	63640000
14	38370000	63740000
14	30030000	39370000
14	86590000	30680000
14	79370000	87380000
14	80510000	80390000
14	71580000	81340000
14	36350000	72110000
14	71580000	36890000
14	37700000	72220000
14	54050000	38350000
14	34300000	54840000
14	29580000	34790000
14	24180000	29990000
14	64250000	24400000
14	50690000	64800000
14	21660000	51330000
14	71040000	21970000
14	59070000	71470000
14	86160000	59490000
14	25250000	86520000
14	76500000	25610000
14	87520000	77130000
14	81680000	88120000
14	99920000	81980000
14	20780000	100400000
14	91280000	21090000
14	60790000	91770000
14	70040000	61040000
14	102440000	70240000
14	67850000	102820000
14	23020000	68230000
14	64970000	23380000
14	72940000	65380000
14	55010000	73410000
14	45350000	55300000
14	58670000	45730000
14	32730000	58930000
14	61930000	32980000
14	37100000	62220000
14	77330000	37640000
14	62320000	77560000
14	75580000	62600000
14	59590000	76120000
14	85580000	59940000
14	39510000	86030000
14	67610000	39900000
14	61750000	67810000
14	53280000	61910000
14	35740000	53440000
14	95890000	35880000
14	60490000	96010000
14	99950000	60710000
14	88200000	100140000
14	75590000	88380000
14	34870000	75770000
14	50060000	35020000
14	57650000	50300000
14	97020000	57870000
14	96500000	97390000
14	104600000	96950000
14	88410000	105100000
14	69660000	88840000
14	33900000	69940000
14	63820000	34260000
14	34300000	64100000
14	37770000	34580000
14	50320000	38010000
14	61090000	50570000
14	93660000	61430000
14	51730000	94090000
14	61470000	52140000
14	92630000	61720000
14	91980000	93160000
14	69310000	92430000
14	73620000	69580000
14	105830000	73940000
14	35910000	105990000
14	96020000	36220000
14	31630000	96460000
14	55900000	31830000
14	74170000	56130000
14	67880000	74350000
14	90750000	68040000
14	70280000	91210000
14	35030000	70530000
14	104200000	35450000
14	68360000	104510000
14	89080000	68700000
14	93370000	89480000
14	35510000	93620000
14	37410000	35890000
14	102840000	37610000
14	24930000	103400000
14	73950000	25150000
14	65620000	74130000
14	64470000	65870000
14	52750000	64780000
14	21160000	52940000
14	96550000	21430000
14	68870000	96750000
14	36540000	69280000
14	20790000	36840000
14	60150000	20940000
14	42590000	60390000
14	51420000	42710000
14	96760000	51690000
14	102420000	96960000
14	31390000	102560000
14	39620000	31580000
14	89080000	39780000
14	102160000	89370000
14	77910000	102400000
14	75350000	78210000
14	103530000	75550000
14	100420000	103790000
14	91360000	100670000
14	76130000	91630000
14	95570000	76470000
14	90430000	95850000
14	100160000	90700000
14	51010000	100380000
14	50760000	51260000
14	55490000	51000000
14	53110000	55650000
14	72980000	53250000
14	75780000	73170000
14	75040000	76110000
14	94120000	75300000
14	32330000	94370000
14	104020000	32530000
14	81420000	104180000
14	65880000	81650000
14	99750000	66110000
14	68050000	99910000
14	95200000	68180000
14	90160000	95510000
14	77580000	90380000
14	100860000	77780000
14	52460000	101120000
14	23580000	52610000
14	22850000	23700000
14	102570000	23000000
14	101130000	102820000
14	92460000	101310000
14	34010000	92620000
14	56190000	34170000
14	76870000	56460000
14	98860000	77110000
14	92910000	99140000
14	101370000	93150000
14	58370000	101580000
14	52270000	58530000
14	78470000	52440000
14	97050000	78790000
14	93820000	97210000
14	94490000	94060000
14	64270000	94640000
14	74780000	64450000
14	55670000	74940000
14	65240000	55870000
14	74560000	65370000
14	103160000	74760000
14	77150000	103380000
14	54480000	77310000
14	94990000	54630000
15	29100000	95160000
15	54220000	29940000
15	60860000	55450000
15	53050000	62130000
15	79610000	54060000
15	93580000	80670000
15	37510000	94670000
15	81700000	38190000
15	49730000	82530000
15	56760000	50430000
15	87500000	57590000
15	69760000	88180000
15	39260000	70910000
15	71250000	39870000
15	90210000	71730000
15	73100000	90650000
15	79180000	73370000
15	98450000	79510000
15	32920000	98740000
15	37180000	33290000
15	60630000	37420000
15	100450000	60810000
15	78230000	100820000
15	69320000	78540000
15	31490000	69700000
15	56530000	31780000
15	44180000	56750000
15	86430000	44520000
15	95210000	86690000
15	41190000	95510000
15	68840000	41660000
15	90260000	68980000
15	91590000	90430000
15	25550000	91810000
15	74910000	25700000
15	64450000	75240000
15	101140000	64670000
15	89590000	101420000
15	48300000	89740000
15	66600000	48570000
15	68140000	66820000
15	59810000	68490000
15	83210000	59940000
15	45400000	83690000
15	77860000	45710000
15	44850000	78170000
15	67210000	45080000
15	59440000	67490000
15	29960000	59790000
15	89870000	30360000
15	57620000	90110000
15	72120000	57830000
15	83910000	72440000
15	40320000	84090000
15	45740000	40480000
15	46360000	45920000
15	38740000	46580000
15	64190000	38980000
15	62140000	64370000
15	89000000	62350000
15	99190000	89180000
15	65910000	99460000
15	56170000	66160000
15	52250000	56390000
15	31180000	52470000
15	101550000	31420000
15	86770000	101800000
15	71740000	87010000
15	66220000	72040000
15	94690000	66570000
15	73830000	94880000
15	74650000	73990000
15	78590000	74900000
15	52850000	78720000
15	58510000	53020000
15	91860000	58890000
15	34370000	92160000
15	43030000	34510000
15	80720000	43230000
15	83500000	81060000
15	50970000	83660000
15	78400000	51190000
15	41730000	78540000
15	99630000	42050000
15	42470000	99780000
15	81550000	42770000
15	66860000	81690000
15	78250000	67160000
15	98790000	78390000
15	81080000	98970000
15	39880000	81280000
15	90670000	40060000
15	63040000	90810000
15	89190000	63380000
15	59990000	89410000
15	90840000	60220000
15	74910000	91020000
15	42250000	75050000
15	63570000	42440000
15	70950000	63710000
15	76470000	71170000
15	75060000	76650000
15	92410000	75240000
15	33300000	92620000
15	99030000	33450000
15	40070000	99180000
15	59230000	40270000
15	79170000	59410000
15	69010000	79310000
15	51500000	69170000
15	65020000	51700000
15	79330000	65250000
15	90440000	79520000
15	80860000	90630000
15	48010000	81060000
15	49150000	48220000
15	99470000	49270000
15	41030000	99610000
15	59530000	41180000
15	40570000	59660000
15	44360000	40830000
15	63750000	44510000
16	62460000	63890000
16	33350000	65160000
16	25280000	34010000
16	6730000	27140000
16	75730000	8350000
16	34180000	77210000
16	65200000	35270000
16	12980000	66360000
16	52190000	13950000
16	51120000	53000000
16	30440000	51750000
16	49470000	30610000
16	2760000	49950000
16	48870000	3000000
16	14370000	49230000
16	88500000	14620000
16	2020000	88640000
16	66920000	2260000
16	46700000	67500000
16	15920000	46970000
16	48410000	16280000
16	15950000	48680000
16	19150000	16160000
16	20800000	19530000
16	85130000	21110000
16	8760000	85720000
16	58830000	8880000
16	74020000	59230000
16	61700000	74310000
16	86580000	62160000
16	77700000	87330000
16	5730000	78040000
16	24050000	6210000
16	81920000	24510000
16	47740000	82270000
16	86080000	48220000
16	58540000	86560000
16	87780000	58780000
16	19390000	87940000
16	55490000	19540000
16	50410000	55730000
16	77260000	50850000
16	24550000	77630000
16	69170000	24810000
16	2320000	69330000
16	85300000	2480000
16	71700000	85680000
16	59800000	72050000
16	57560000	60250000
16	75230000	58060000
16	19570000	75450000
16	83640000	19900000
16	55960000	83830000
16	4740000	56370000
16	13990000	5140000
16	78140000	14320000
16	27160000	78290000
16	68550000	27400000
16	85840000	68870000
16	87410000	86050000
16	11040000	87690000
16	23730000	11400000
16	10840000	24040000
16	8990000	11030000
16	70360000	9230000
16	81040000	70550000
16	80010000	81370000
16	74980000	80410000
16	69370000	75190000
16	50050000	69730000
16	56440000	50390000
16	66970000	56780000
16	81400000	67200000
16	80550000	81760000
16	57570000	80900000
16	83950000	57770000
16	3230000	84100000
16	57790000	3510000
16	58360000	58040000
16	11480000	58520000
16	10350000	11810000
16	73600000	10590000
16	57330000	73920000
16	89620000	57460000
16	31210000	89750000
16	68920000	31460000
16	72520000	69150000
16	74720000	72790000
16	30780000	74900000
16	30970000	30950000
16	72860000	31190000
16	51800000	73220000
16	860000	52030000
16	23180000	1260000
16	1850000	23440000
16	56600000	2000000
16	12610000	56740000
16	58540000	12930000
16	10610000	58660000
16	86330000	10820000
16	88880000	86550000
16	75470000	89270000
16	89350000	75650000
16	5760000	89590000
16	66380000	6050000
16	67520000	66630000
16	9790000	67700000
16	23480000	10050000
16	87100000	23690000
16	69810000	87330000
16	68120000	69970000
16	84790000	68260000
16	67280000	84990000
16	68730000	67500000
16	17550000	68870000
16	71420000	17730000
16	53980000	71570000
16	85450000	54220000
16	85690000	85650000
16	54810000	85830000
16	84530000	54980000
16	730000	84760000
16	53720000	850000
16	3720000	53950000
16	4300000	3940000
16	81060000	4460000
16	89770000	81270000
16	59470000	89970000
16	29870000	59670000
16	61970000	30030000
16	84260000	62130000
16	11490000	84500000
16	19200000	11610000
16	11650000	19380000
16	85130000	11800000
16	270000	85300000
16	82610000	410000
16	68410000	82790000
17	67490000	68550000
17	10650000	68600000
17	63210000	11830000
17	58770000	64110000
17	10750000	59470000
17	8820000	11730000
17	67530000	9450000
17	55190000	68140000
17	71420000	55840000
17	44090000	72180000
17	29230000	44250000
17	43710000	29540000
17	55910000	43890000
17	32740000	56060000
17	16880000	33240000
17	70720000	17130000
17	55910000	71180000
17	53080000	56230000
17	77110000	53380000
17	41410000	77330000
17	43350000	41570000
17	21200000	43470000
17	57350000	21420000
17	35040000	57590000
17	64190000	35320000
17	76080000	64670000
17	29870000	76430000
17	56380000	30170000
17	74740000	56530000
17	33280000	75260000
17	2680000	33450000
17	15130000	2940000
17	17570000	15410000
17	61490000	17990000
17	53600000	61810000
17	42470000	53860000
17	75520000	42770000
17	7120000	76020000
17	78390000	7490000
17	13490000	78910000
17	36870000	13830000
17	42840000	37090000
17	31340000	43190000
17	18090000	31650000
17	41160000	18230000
17	70550000	41390000
17	37160000	70710000
17	53430000	37330000
17	29720000	53590000
17	66250000	29860000
17	15960000	66450000
17	39850000	16260000
17	42270000	40070000
17	37690000	42430000
17	9860000	38120000
17	11890000	10180000
17	65360000	12040000
17	76800000	65700000
17	8290000	76990000
17	71190000	8680000
17	70120000	71390000
17	78540000	70530000
17	78050000	78920000
17	25520000	78360000
17	47920000	25670000
17	19410000	48080000
17	32500000	19690000
17	6560000	32690000
17	54640000	6910000
17	38570000	54840000
17	6930000	38720000
17	64710000	7100000
17	7600000	65040000
17	31100000	7960000
17	59490000	31260000
17	650000	59650000
17	5490000	900000
17	74740000	5890000
17	1800000	75060000
17	60780000	1940000
17	10250000	61040000
17	59690000	10510000
17	74510000	59930000
17	17220000	74710000
17	41590000	17550000
17	65090000	41850000
17	27050000	65340000
17	2320000	27270000
17	66520000	2610000
17	48850000	66750000
17	14550000	49050000
17	54880000	14830000
17	79230000	55040000
17	33920000	79470000
17	28120000	34050000
17	42970000	28330000
17	73270000	43120000
17	46730000	73410000
17	48240000	46960000
17	75290000	48410000
17	49060000	75500000
17	1950000	49240000
17	47640000	2190000
17	27280000	47780000
17	930000	27430000
17	76460000	1100000
17	59970000	76750000
17	4590000	60140000
17	40460000	4800000
17	48560000	40680000
17	38140000	48780000
17	27900000	38320000
17	46450000	28110000
17	6180000	46670000
17	45270000	6330000
17	17770000	45410000
17	40980000	17950000
17	80300000	41130000
17	47490000	80540000
17	75070000	47630000
17	76250000	75260000
17	57130000	76430000
17	38760000	57290000
17	6350000	38940000
17	17250000	6540000
17	4080000	17390000
17	20930000	4310000
17	46230000	21160000
17	27630000	46410000
17	19870000	27880000
17	9470000	20010000
17	7800000	9660000
17	12410000	7960000
17	29550000	12610000
17	75750000	29690000
17	17560000	75950000
17	3620000	17720000
17	25710000	3740000
17	76080000	25930000
17	74100000	76230000
17	75520000	74280000
17	1570000	75720000
17	37920000	1760000
17	7250000	38100000
17	3750000	7470000
17	73030000	4030000
17	40090000	73220000
17	1240000	40290000
17	47130000	1410000
17	4810000	47290000
18	68500000	4960000
18	4430000	70260000
18	52940000	7530000
18	75480000	54250000
18	70360000	76690000
18	64870000	71790000
18	41650000	66360000
18	59200000	43040000
18	60670000	59820000
18	22140000	60980000
18	60990000	22310000
18	47740000	61160000
18	19790000	47910000
18	13170000	20130000
18	77130000	13640000
18	48330000	77410000
18	23920000	48570000
18	20710000	24190000
18	67930000	21000000
18	20370000	68110000
18	33580000	20560000
18	51430000	33860000
18	18770000	51650000
18	10530000	19090000
18	39330000	10760000
18	21170000	39490000
18	60000000	21400000
18	56440000	60250000
18	29850000	56740000
18	43270000	30040000
18	55280000	43460000
18	19170000	55520000
18	74500000	19390000
18	32220000	74660000
18	9970000	32370000
18	45290000	10510000
18	3700000	45530000
18	56190000	4020000
18	21520000	56380000
18	12090000	21700000
18	11240000	12270000
18	51670000	11560000
18	12380000	51820000
18	640000	12670000
18	2870000	850000
18	280000	3240000
18	3260000	580000
18	9550000	3670000
18	8640000	9950000
18	2570000	9020000
18	10840000	2800000
18	19480000	11060000
18	55540000	19740000
18	46000000	55820000
18	2240000	46190000
18	12700000	2530000
18	3270000	12940000
18	45730000	3450000
18	43690000	45970000
18	12960000	43840000
18	57320000	13130000
18	7810000	57490000
18	45550000	8010000
18	9570000	45700000
18	8430000	9730000
18	8840000	8600000
18	8060000	9000000
1	48740000	8230000
1	3990000	50810000
1	6760000	5850000
1	118530000	7740000
1	68990000	120030000
1	87580000	70260000
1	163360000	89070000
1	36940000	165040000
1	14250000	38140000
1	60440000	15420000
1	82440000	61290000
1	169860000	83170000
1	158170000	170910000
1	34010000	159050000
1	60600000	35200000
1	236770000	61270000
1	215960000	237600000
1	100220000	216790000
1	95780000	100860000
1	146490000	96400000
1	168530000	147390000
1	213440000	169330000
1	231840000	214350000
1	245260000	232640000
1	2690000	246160000
1	230720000	3340000
1	36970000	231370000
1	210590000	37900000
1	198710000	211310000
1	55740000	199460000
1	64060000	56370000
1	150420000	64710000
1	206640000	150900000
1	58980000	206760000
1	22440000	59140000
1	226770000	22970000
1	220440000	227160000
1	224310000	220900000
1	12360000	224540000
1	197540000	12690000
1	45190000	197880000
1	77360000	45470000
1	44690000	77570000
1	15430000	45130000
1	2320000	15840000
1	167670000	2480000
1	116690000	168120000
1	162580000	117040000
1	26900000	162770000
1	228780000	27210000
1	203830000	229360000
1	233490000	204360000
1	17420000	233930000
1	202350000	17730000
1	154110000	202690000
1	36550000	154250000
1	161180000	36920000
1	180920000	161320000
1	112940000	181140000
1	166440000	113210000
1	77610000	166770000
1	21540000	78000000
1	98530000	21980000
1	21070000	98940000
1	6280000	21520000
1	179040000	6480000
1	241680000	179340000
1	9310000	242020000
1	26360000	9520000
1	67990000	26760000
1	235300000	68240000
1	84360000	235630000
1	222910000	84580000
1	89130000	223250000
1	172710000	89350000
1	160950000	173190000
1	93310000	161130000
1	86180000	93470000
1	231470000	86370000
1	236260000	231740000
1	105510000	236720000
1	117250000	105700000
1	174720000	117600000
1	224670000	174960000
1	25170000	225110000
1	27290000	25530000
1	175000000	27620000
1	151380000	175320000
1	41290000	151830000
1	24970000	41440000
1	215340000	25160000
1	21540000	215710000
1	114880000	21690000
1	113250000	115270000
1	242280000	113630000
1	33560000	242450000
1	161740000	33960000
1	202160000	162010000
1	172030000	202290000
1	85410000	172390000
1	173370000	85720000
1	165600000	173740000
1	228310000	165890000
1	112000000	228740000
1	185270000	112300000
1	68300000	185650000
1	92450000	68510000
1	77660000	92740000
1	180470000	77900000
1	227230000	180830000
1	48550000	227630000
1	179820000	48700000
1	184220000	180150000
1	201960000	184640000
1	200530000	202110000
1	90270000	200810000
1	68580000	90470000
1	94080000	68840000
1	15630000	94310000
1	182840000	15790000
1	19200000	183220000
1	182540000	19400000
1	22020000	182780000
1	62630000	22380000
1	157140000	62870000
1	12130000	157490000
1	20840000	12290000
1	204360000	20980000
1	212230000	204510000
1	114510000	212560000
1	207260000	114850000
1	81520000	207580000
1	67690000	81740000
1	31190000	67960000
1	246190000	31400000
1	45780000	246630000
1	44210000	45950000
1	10560000	44410000
1	160640000	11040000
1	192420000	160940000
1	84610000	192580000
1	40530000	84900000
1	46470000	40860000
1	52860000	46700000
1	99950000	53160000
1	209740000	100180000
1	15860000	209960000
1	78440000	16070000
1	182040000	78580000
1	17790000	182390000
1	52290000	17960000
1	244460000	52510000
1	52560000	244610000
1	43370000	52810000
1	178270000	43540000
1	169350000	178470000
1	151850000	169520000
1	45480000	152010000
1	234240000	45760000
1	18910000	234540000
1	24510000	19170000
1	203450000	24720000
1	108110000	203760000
1	247090000	108290000
1	54560000	247370000
1	169530000	54960000
1	85240000	169810000
1	53700000	85400000
1	23300000	53880000
1	116330000	23610000
1	172550000	116580000
1	212640000	172690000
1	152610000	212810000
1	160370000	152830000
1	220140000	160590000
1	26150000	220350000
1	192750000	26340000
1	196100000	192980000
1	66710000	196280000
1	235990000	66910000
1	40270000	236160000
1	19640000	40520000
1	28360000	19980000
1	1840000	28540000
1	214510000	2060000
1	110320000	214800000
1	41720000	110520000
1	1680000	41930000
1	23010000	1830000
1	211850000	23250000
1	47900000	212190000
1	66930000	48180000
1	177940000	67190000
1	162020000	178250000
1	30880000	162400000
1	201190000	31180000
1	11530000	201360000
1	58220000	11720000
1	39560000	58410000
1	198460000	39730000
1	183070000	198660000
1	157320000	183200000
1	165070000	157470000
1	183250000	165320000
1	246650000	183590000
1	181150000	246950000
1	162820000	181400000
1	210010000	163000000
1	179650000	210180000
1	172390000	179800000
1	30340000	172700000
1	55340000	30600000
1	150520000	55510000
1	75720000	150890000
1	36760000	75900000
1	229390000	36890000
1	94980000	229630000
1	153470000	95270000
1	153760000	153610000
1	39310000	153960000
1	200270000	39510000
1	118300000	200480000
1	53940000	118460000
1	166840000	54180000
1	111730000	167020000
1	227710000	111940000
1	180230000	227890000
1	152890000	180450000
1	2120000	153190000
1	111170000	2310000
1	36550000	111330000
1	33340000	36750000
1	115670000	33540000
1	160050000	115870000
1	209380000	160310000
1	165350000	209680000
1	154540000	165550000
1	114320000	154890000
1	116140000	114500000
1	16090000	116320000
1	245020000	16310000
1	95290000	245210000
1	109230000	95520000
1	178500000	109450000
1	201490000	178730000
1	218500000	201790000
1	15440000	218700000
1	23400000	15620000
1	210290000	23600000
1	1270000	210540000
1	35440000	1440000
1	203830000	35640000
1	16390000	204100000
1	61300000	16560000
1	42270000	61500000
1	175120000	42510000
1	44860000	175290000
1	27730000	45080000
1	184750000	27980000
1	31860000	184960000
1	167030000	32040000
1	226810000	167200000
1	165720000	227020000
1	94660000	165880000
1	54310000	94810000
1	32080000	54520000
1	208200000	32260000
1	33160000	208430000
1	226290000	33290000
1	202710000	226570000
1	55540000	202970000
1	23860000	55720000
1	3360000	24010000
1	29210000	3540000
1	67430000	29420000
1	225650000	67630000
1	183640000	225950000
1	19410000	183880000
1	36030000	19570000
1	206890000	36240000
1	36310000	207170000
1	51980000	36530000
1	28560000	52230000
1	11080000	28830000
1	860000	11320000
1	155320000	1000000
1	221890000	155570000
1	227920000	222180000
1	154900000	228140000
1	62160000	155050000
1	156600000	62320000
1	25950000	156920000
1	171760000	26120000
1	11860000	171950000
1	204110000	12090000
1	41070000	204350000
1	153280000	41270000
1	20530000	153460000
1	187900000	20810000
1	117100000	188090000
1	203000000	117260000
1	233980000	203200000
1	207990000	234200000
1	65520000	208170000
1	1010000	65680000
1	32890000	1230000
1	244770000	33100000
1	235670000	244970000
1	236520000	235940000
1	230180000	236670000
1	225970000	230400000
1	186450000	226170000
1	59240000	186630000
1	156320000	59390000
1	156050000	156580000
1	24740000	156230000
1	42030000	24960000
1	43680000	42250000
1	65310000	43880000
1	20240000	65490000
1	22440000	20470000
1	204520000	22720000
1	32640000	204770000
1	20020000	32850000
1	205330000	20200000
1	167520000	205490000
1	154300000	167670000
1	45310000	154470000
1	22800000	45460000
1	26590000	22980000
1	39750000	26750000
1	28160000	39930000
1	211690000	28320000
1	38490000	211830000
1	177140000	38670000
1	244220000	177320000
1	156760000	244430000
1	44520000	156920000
1	200920000	44670000
1	150990000	201070000
20	60720000	151130000
20	18590000	61480000
20	53330000	19590000
20	40350000	54770000
20	21640000	42010000
20	59200000	22250000
20	57410000	60480000
20	4720000	58090000
20	35140000	5080000
20	21200000	35550000
20	52680000	21490000
20	62150000	52820000
20	8050000	62610000
20	11650000	8290000
20	48540000	11960000
20	61660000	48720000
20	23410000	62100000
20	5210000	23620000
20	1280000	5460000
20	6860000	1460000
20	48790000	7070000
20	52840000	49200000
20	4190000	53250000
20	50250000	4570000
20	56800000	50730000
20	49220000	57280000
20	17470000	49370000
20	44610000	17650000
20	35840000	45060000
20	52180000	36170000
20	39590000	52560000
20	19660000	39760000
20	22300000	20000000
20	23000000	22650000
20	49390000	23320000
20	56170000	49580000
20	55120000	56780000
20	4580000	55580000
20	12900000	4720000
20	5930000	13090000
20	32280000	6090000
20	30100000	32720000
20	47610000	30370000
20	780000	47890000
20	44410000	950000
20	10410000	44590000
20	32860000	10640000
20	34550000	33110000
20	47930000	34740000
20	44730000	48140000
20	42070000	45030000
20	9380000	42340000
20	5510000	9590000
20	24960000	5770000
20	35880000	25160000
20	45830000	36020000
20	20340000	46270000
20	55930000	20570000
20	2460000	56070000
20	17660000	2650000
20	6540000	17900000
20	43930000	6750000
20	51380000	44080000
20	31540000	51720000
20	33130000	31890000
20	18020000	33360000
20	330000	18260000
20	31080000	520000
20	47260000	31240000
20	42370000	47530000
20	36670000	42710000
20	45360000	37030000
20	48210000	45800000
20	530000	48510000
20	52370000	730000
20	55660000	52550000
20	45830000	55920000
20	31980000	46010000
20	30400000	32250000
20	24570000	30680000
20	37240000	24790000
20	45130000	37540000
20	56800000	45330000
20	33410000	57020000
20	36180000	33620000
20	58130000	36640000
20	34330000	58320000
20	1940000	34530000
20	48800000	2160000
20	49950000	49080000
20	44170000	50230000
20	43100000	44390000
20	43750000	43250000
20	49600000	43910000
20	55200000	49920000
20	1750000	55420000
20	33860000	1910000
20	23980000	34030000
20	50250000	24180000
20	39780000	50400000
20	43580000	39960000
20	51440000	43730000
20	47010000	51600000
20	54940000	47240000
20	35400000	55090000
20	37720000	35520000
20	58510000	37890000
20	34050000	58650000
20	33670000	34240000
Y	9930000	33850000
19	51950000	13860000
19	36810000	54580000
19	11760000	38320000
19	44320000	12760000
19	9250000	45010000
19	41150000	9920000
19	14250000	41320000
19	38370000	14590000
19	15760000	38610000
19	8370000	16110000
19	33460000	8550000
19	33700000	33610000
19	51300000	33900000
19	18530000	51610000
19	8010000	18990000
19	56560000	8320000
19	41940000	56860000
19	40040000	42090000
19	34650000	40240000
19	33920000	34840000
19	13070000	34240000
19	55980000	13220000
19	39190000	56160000
19	13380000	39390000
19	11330000	13680000
19	46520000	11700000
19	55620000	46770000
19	38710000	55970000
19	57710000	38870000
19	10230000	57910000
19	47970000	10500000
19	49130000	48200000
19	1100000	49370000
19	5040000	1240000
19	5980000	5570000
19	16340000	6360000
19	6730000	16510000
19	54980000	6860000
19	10360000	55130000
19	12780000	10500000
19	35520000	13040000
19	2450000	35760000
19	44170000	2630000
19	15270000	44310000
19	47550000	15530000
19	3280000	47750000
19	1270000	3490000
19	50190000	1430000
19	1490000	50350000
19	48970000	1830000
19	29630000	49110000
19	35820000	29770000
19	41700000	35990000
19	9970000	41850000
19	16780000	10190000
19	14250000	17150000
19	49730000	14480000
19	5720000	49940000
19	2950000	5940000
19	13700000	3200000
19	16130000	13830000
19	350000	16310000
19	56870000	480000
19	47350000	57030000
19	13980000	47500000
19	10570000	14220000
19	17670000	10810000
19	2640000	17960000
19	4800000	2770000
19	19440000	5030000
19	17170000	19620000
19	820000	17390000
19	11000000	1010000
19	45160000	11220000
19	16790000	45340000
19	45670000	17020000
19	4240000	45840000
19	6480000	4390000
19	4520000	6650000
19	47780000	4660000
19	5350000	47900000
19	18700000	5540000
19	3990000	18960000
19	10820000	4220000
19	14690000	10970000
19	18550000	14840000
19	6160000	18690000
19	46000000	6330000
19	18990000	46190000
22	33620000	19140000
22	48570000	35600000
22	50150000	50060000
22	18360000	51170000
22	30070000	18560000
22	23480000	30450000
22	46380000	23640000
22	42080000	46720000
22	36750000	42940000
[truncated: 1,627 more rows]

## Sheet: HK1_R2
Supplementary Table S4: TADs called by Arrowhead from Hi-C libraries
#chr	x1	x2
9	75810000	77260000
9	2110000	2820000
9	122150000	123050000
9	73240000	73860000
9	103400000	104120000
9	119470000	120230000
9	92900000	93540000
9	113380000	114100000
9	101950000	102560000
9	133340000	133550000
9	32580000	32970000
9	132860000	132990000
9	140770000	140970000
9	136230000	136370000
9	33940000	34320000
9	72940000	73170000
9	97470000	97890000
9	118950000	119390000
9	32390000	32560000
9	19470000	19890000
9	99090000	99440000
9	18230000	18700000
9	115160000	115590000
9	96770000	96970000
9	79370000	79760000
9	21230000	21470000
9	86600000	86910000
9	35120000	35460000
9	33030000	33260000
9	111670000	112280000
9	135240000	135860000
9	72550000	72870000
9	19920000	20350000
9	19040000	19460000
9	37470000	37820000
9	17510000	17780000
9	124850000	125210000
9	12690000	12910000
9	127300000	127610000
9	136880000	137020000
9	14060000	14350000
9	135890000	136030000
9	91240000	91590000
9	15860000	16130000
9	93650000	94190000
9	31120000	31300000
9	79040000	79330000
9	72030000	72180000
9	34650000	35050000
9	117790000	118290000
9	1020000	1360000
9	100440000	100670000
9	6350000	6740000
9	134440000	134620000
9	21520000	21790000
9	71640000	71860000
9	88640000	88870000
9	37060000	37360000
9	19040000	19180000
9	124850000	125110000
9	127640000	128140000
9	133950000	134400000
9	23520000	23840000
9	125830000	126130000
9	31490000	31700000
9	74650000	74880000
9	6050000	6310000
9	4380000	4650000
9	74920000	75210000
9	124280000	124810000
9	15200000	15430000
9	37900000	38070000
9	27320000	27540000
9	123960000	124200000
9	125230000	125570000
9	102780000	102980000
9	20620000	20930000
9	140190000	140430000
9	36750000	37030000
9	22000000	22240000
9	72270000	72540000
9	104160000	104320000
9	137210000	137330000
9	21810000	21990000
9	34380000	34610000
9	139380000	139560000
9	110220000	110650000
9	81430000	81730000
9	133580000	133730000
9	96440000	96730000
9	27020000	27280000
9	100210000	100380000
9	86990000	87250000
9	75460000	75660000
9	101040000	101550000
9	132390000	132560000
9	107530000	107910000
9	118350000	118610000
9	134630000	135130000
9	91950000	92170000
9	100820000	101030000
9	870000	1000000
9	109930000	110110000
9	112650000	112920000
9	117450000	117770000
9	22280000	22460000
9	101750000	101900000
9	95410000	95560000
9	130210000	130680000
9	90290000	90490000
9	136630000	136860000
9	125590000	125780000
9	131880000	132380000
9	114490000	114840000
9	116850000	117080000
9	106940000	107140000
9	101580000	101920000
9	15440000	15610000
9	111880000	112280000
9	74420000	74630000
9	116200000	116440000
9	128230000	128510000
9	139980000	140150000
9	115160000	115470000
9	4750000	4990000
9	89960000	90260000
9	136450000	136590000
9	117160000	117410000
9	136050000	136190000
9	114850000	115130000
9	600000	760000
9	4040000	4360000
9	80390000	80650000
9	5440000	5590000
9	79450000	79640000
9	95090000	95390000
9	107940000	108170000
9	79780000	80000000
9	94510000	94770000
9	126870000	127100000
9	135150000	135270000
9	16190000	16530000
9	5840000	6030000
9	131600000	131800000
9	36200000	36380000
9	112970000	113170000
9	132620000	132840000
9	91670000	91910000
9	127650000	127920000
9	124620000	124770000
9	34670000	34880000
9	118640000	118920000
9	3740000	4360000
9	134800000	135030000
9	116480000	116820000
9	129690000	129960000
9	1080000	1260000
9	129970000	130190000
9	38080000	38310000
9	127950000	128130000
9	91000000	91180000
9	36850000	37000000
9	82180000	82360000
9	84130000	84290000
9	127150000	127290000
9	33350000	33490000
9	5170000	5380000
9	123510000	123710000
9	130690000	130880000
9	127350000	127500000
9	95920000	96070000
9	137350000	137580000
9	72610000	72740000
9	133740000	133920000
9	112310000	112600000
9	20180000	20340000
9	89280000	89430000
9	135280000	135460000
9	139660000	139930000
9	124290000	124440000
9	132130000	132370000
9	134000000	134210000
9	137960000	138300000
9	114510000	114660000
9	78750000	78910000
9	98770000	98960000
9	131920000	132090000
9	140520000	140700000
9	111710000	111880000
9	134220000	134400000
9	130520000	130680000
9	139680000	139830000
9	112150000	112290000
9	131220000	131370000
9	117510000	117640000
10	7860000	9350000
10	130010000	133670000
10	30940000	32080000
10	3210000	4850000
10	44030000	45560000
10	30990000	31800000
10	1880000	2670000
10	35900000	37140000
10	132000000	133370000
10	100220000	101080000
10	12280000	13140000
10	28920000	29640000
10	127530000	128300000
10	106750000	107480000
10	122810000	123230000
10	102910000	103330000
10	122690000	123290000
10	50780000	50970000
10	101610000	101930000
10	10740000	10980000
10	92640000	93030000
10	18220000	18540000
10	89730000	90140000
10	118630000	118930000
10	91170000	91480000
10	11570000	11790000
10	16870000	17290000
10	53780000	53970000
10	95090000	95260000
10	74120000	74630000
10	5480000	5670000
10	79590000	79790000
10	106030000	106390000
10	35520000	35860000
10	125920000	126070000
10	93810000	94200000
10	61000000	61350000
10	111890000	112050000
10	30310000	30570000
10	92500000	92630000
10	26650000	26840000
10	24660000	24800000
10	114970000	115350000
10	99500000	99860000
10	124780000	125310000
10	121340000	121660000
10	6460000	6700000
10	112060000	112320000
10	7550000	7770000
10	28530000	28680000
10	15160000	15420000
10	71910000	72160000
10	62200000	62530000
10	14240000	14520000
10	96090000	96290000
10	43040000	43290000
10	13200000	13370000
10	13830000	14210000
10	48300000	48660000
10	16610000	16820000
10	125330000	125710000
10	76450000	76860000
10	91550000	91890000
10	97760000	98100000
10	95640000	96030000
10	21830000	22030000
10	116600000	116880000
10	18350000	18530000
10	106140000	106380000
10	99160000	99440000
10	75260000	75410000
10	73060000	73570000
10	32110000	32290000
10	75590000	75870000
10	96940000	97120000
10	115600000	115860000
10	78920000	79430000
10	73840000	74100000
10	13680000	13820000
10	90990000	91160000
10	64350000	64570000
10	120040000	120310000
10	120940000	121260000
10	101130000	101360000
10	86330000	86510000
10	82140000	82300000
10	129680000	129860000
10	102040000	102280000
10	280000	490000
10	81120000	81260000
10	70970000	71160000
10	70520000	70690000
10	116300000	116570000
10	86120000	86290000
10	95290000	95450000
10	88150000	88380000
10	60540000	60700000
10	90770000	90970000
10	88440000	88670000
10	21560000	21790000
10	118960000	119230000
10	99510000	99660000
10	134650000	135050000
10	72660000	73040000
10	120320000	120780000
10	103920000	104140000
10	94830000	95050000
10	13400000	13620000
10	124520000	124750000
10	61590000	61810000
10	91180000	91330000
10	124050000	124200000
10	54380000	54540000
10	72310000	72510000
10	97440000	97620000
10	64020000	64220000
10	105460000	105640000
10	101600000	101810000
10	11820000	12030000
10	70740000	70930000
10	90320000	90570000
10	93510000	93700000
10	103590000	103800000
10	32330000	32490000
10	43340000	43610000
10	97170000	97360000
10	17310000	17470000
10	22870000	23000000
10	104570000	104830000
10	103340000	103540000
10	122130000	122370000
10	98120000	98330000
10	120500000	120790000
10	93250000	93480000
10	104840000	105110000
10	50590000	50750000
10	62620000	62800000
10	116060000	116210000
10	134270000	134450000
10	62200000	62400000
10	98790000	98990000
10	73130000	73430000
10	102310000	102640000
10	123680000	123900000
10	94220000	94400000
10	33300000	33450000
10	126220000	126420000
10	119260000	119480000
10	98570000	98730000
10	49560000	49720000
10	43690000	43870000
10	114710000	114890000
10	123490000	123660000
10	77010000	77150000
10	99670000	99830000
10	73650000	73830000
10	62000000	62190000
10	80820000	80950000
10	70290000	70470000
10	94620000	94820000
10	100000000	100180000
10	76010000	76170000
10	120320000	120480000
10	94430000	94590000
10	126680000	126840000
10	134460000	134620000
10	80660000	80810000
11	128860000	129630000
11	27580000	29380000
11	79910000	80730000
11	84450000	85270000
11	108550000	109710000
11	121510000	122410000
11	93490000	94240000
11	130880000	131530000
11	126370000	127130000
11	128020000	128720000
11	68860000	69470000
11	110330000	111130000
11	134210000	134940000
11	94880000	95490000
11	15830000	16650000
11	95550000	96160000
11	110450000	111100000
11	119340000	119990000
11	18090000	18780000
11	100880000	101520000
11	116740000	116970000
11	122490000	122650000
11	124490000	124690000
11	125770000	126070000
11	72560000	72840000
11	82410000	82590000
11	13770000	14270000
11	122990000	123140000
11	99010000	99620000
11	5140000	5410000
11	129790000	130020000
11	102560000	102930000
11	1670000	2020000
11	85380000	85550000
11	69780000	69920000
11	3690000	3830000
11	3870000	4090000
11	73660000	73920000
11	11250000	11810000
11	57110000	57410000
11	70280000	71270000
11	63780000	63920000
11	112150000	112440000
11	14300000	14530000
11	19080000	19300000
11	120200000	120340000
11	125540000	125720000
11	860000	1050000
11	43040000	43300000
11	111450000	111650000
11	110070000	110270000
11	60700000	60900000
11	35480000	36300000
11	43600000	43890000
11	33180000	33360000
11	85750000	85930000
11	57430000	57590000
11	61210000	61530000
11	130070000	130280000
11	122730000	122910000
11	75610000	75840000
11	44120000	44560000
11	32970000	33140000
11	102220000	102530000
11	45860000	46360000
11	62150000	62300000
11	19580000	19760000
11	105760000	105940000
11	73130000	73370000
11	106190000	106460000
11	19960000	20140000
11	69780000	70030000
11	32050000	32190000
11	6390000	6720000
11	17120000	17390000
11	34940000	35430000
11	19330000	19560000
11	2200000	2450000
11	86150000	86320000
11	64210000	64500000
11	7880000	8010000
11	117280000	117640000
11	36310000	36660000
11	125030000	125280000
11	63230000	63410000
11	16790000	17090000
11	9160000	9510000
11	7520000	7700000
11	113930000	114120000
11	47190000	47410000
11	118920000	119200000
11	5490000	5760000
11	47900000	48160000
11	10800000	10950000
11	65420000	65790000
11	61940000	62120000
11	113170000	113390000
11	118040000	118220000
11	71720000	71940000
11	75880000	76040000
11	108360000	108530000
11	117670000	117930000
11	8690000	8980000
11	43320000	43470000
11	2550000	2910000
11	126150000	126300000
11	124820000	125010000
11	17750000	18000000
11	13500000	13760000
11	120030000	120170000
11	65430000	65610000
11	44940000	45350000
11	75120000	75270000
11	63580000	63740000
11	10410000	10760000
11	63950000	64120000
11	13220000	13390000
11	12060000	12300000
11	34170000	34510000
11	118230000	118390000
11	12970000	13200000
11	65120000	65290000
11	34940000	35200000
11	34380000	34510000
11	46890000	47160000
11	74160000	74300000
11	73460000	73630000
11	71960000	72140000
11	10540000	10710000
11	45370000	45800000
11	68360000	68840000
11	64550000	64860000
11	17250000	17380000
11	19780000	19930000
11	34190000	34370000
11	12340000	12600000
11	12680000	12920000
11	34550000	34920000
11	15090000	15240000
11	100440000	100800000
11	13790000	13970000
11	16950000	17090000
11	56880000	57020000
11	44940000	45120000
11	70800000	71160000
11	35860000	36200000
11	17400000	17570000
11	44640000	44930000
11	111140000	111310000
11	109820000	110010000
11	65630000	65770000
11	35240000	35430000
11	540000	790000
11	1710000	1870000
11	102640000	102800000
11	6550000	6710000
11	67770000	67970000
11	66450000	66600000
11	11670000	11800000
11	45130000	45350000
11	44310000	44560000
11	2720000	2900000
11	65820000	66020000
11	46390000	46650000
11	44120000	44280000
11	36310000	36500000
11	9620000	9770000
11	43910000	44090000
11	9780000	10000000
11	35630000	35840000
11	70300000	70610000
11	47430000	47610000
11	66840000	67000000
11	64660000	64840000
11	17600000	17740000
11	70050000	70260000
11	107630000	107770000
11	6240000	6380000
11	68230000	68360000
11	66610000	66810000
11	64940000	65110000
11	68680000	68850000
11	68020000	68220000
11	70630000	70790000
12	44330000	45330000
12	46380000	48080000
12	45500000	46320000
12	70230000	70970000
12	17040000	18220000
12	46440000	47410000
12	75070000	75710000
12	42870000	43730000
12	99420000	100150000
12	47420000	48040000
12	67740000	68400000
12	119110000	120030000
12	115050000	116260000
12	103270000	103940000
12	19860000	20540000
12	131380000	132130000
12	89930000	90670000
12	25550000	26190000
12	2100000	2890000
12	124820000	125380000
12	27160000	27440000
12	104770000	105250000
12	77000000	77180000
12	76530000	76730000
12	109870000	110340000
12	23000000	23330000
12	63000000	63190000
12	69260000	69490000
12	10420000	10720000
12	50890000	51110000
12	7360000	7780000
12	64910000	65090000
12	49750000	49950000
12	109550000	109840000
12	65290000	65490000
12	109020000	109230000
12	114410000	115000000
12	97380000	97730000
12	75740000	75880000
12	44140000	44290000
12	108310000	108900000
12	53940000	54080000
12	65950000	66220000
12	132310000	132540000
12	93860000	94500000
12	89000000	89390000
12	54160000	54340000
12	79570000	79730000
12	54420000	54560000
12	57910000	58130000
12	104570000	104740000
12	107490000	108020000
12	31550000	31790000
12	22220000	22560000
12	58730000	58940000
12	96650000	96910000
12	54640000	54830000
12	69770000	69970000
12	21850000	22160000
12	88530000	88850000
12	122730000	122980000
12	89410000	89910000
12	110480000	110860000
12	97070000	97350000
12	27660000	27820000
12	94910000	95270000
12	22620000	22830000
12	93360000	93800000
12	57140000	57390000
12	1770000	1890000
12	67390000	67610000
12	7360000	7640000
12	14370000	14630000
12	3980000	4410000
12	97850000	98090000
12	25130000	25300000
12	118600000	118810000
12	13150000	13390000
12	93910000	94130000
12	25350000	25540000
12	79950000	80130000
12	14950000	15160000
12	133210000	133390000
12	27870000	28090000
12	123750000	124110000
12	52540000	52740000
12	21080000	21330000
12	6680000	6970000
12	57650000	57840000
12	8790000	9040000
12	124820000	125260000
12	20560000	20770000
12	32510000	32860000
12	10740000	10900000
12	530000	660000
12	106150000	106550000
12	95970000	96240000
12	6150000	6390000
12	31000000	31180000
12	123110000	123260000
12	116420000	116700000
12	112960000	113360000
12	3400000	3920000
12	15720000	16020000
12	57410000	57610000
12	16590000	16880000
12	110900000	111060000
12	28110000	28340000
12	11690000	12180000
12	30830000	30970000
12	9240000	9420000
12	120550000	120720000
12	89430000	89730000
12	105520000	105780000
12	96440000	96610000
12	106610000	106750000
12	107510000	107790000
12	5650000	6030000
12	123300000	123450000
12	52990000	53250000
12	95480000	95650000
12	109890000	110230000
12	1230000	1710000
12	18690000	18990000
12	113870000	114360000
12	118300000	118440000
12	12870000	13080000
12	105810000	106080000
12	1910000	2070000
12	117450000	117570000
12	12500000	12860000
12	31810000	32120000
12	111330000	111740000
12	5180000	5560000
12	12220000	12480000
12	124230000	124490000
12	94930000	95150000
12	15430000	15670000
12	19010000	19340000
12	3190000	3390000
12	100740000	100940000
12	108150000	108290000
12	118840000	119070000
12	117640000	117820000
12	99150000	99350000
12	32900000	33090000
12	116710000	117100000
12	14140000	14290000
12	49210000	49420000
12	117150000	117390000
12	121730000	121890000
12	32210000	32470000
12	19470000	19690000
12	107850000	108000000
12	7980000	8170000
12	123470000	123660000
12	4940000	5120000
12	98930000	99090000
12	125660000	125920000
12	26240000	26560000
12	132990000	133190000
12	109670000	109840000
12	4460000	4640000
12	92390000	92550000
12	113620000	113850000
12	680000	850000
12	121190000	121430000
12	10150000	10290000
12	112620000	112830000
12	111080000	111300000
12	26580000	26800000
12	108690000	108890000
12	56710000	56870000
12	4180000	4380000
12	125430000	125630000
12	104350000	104520000
12	13460000	13690000
12	104120000	104320000
12	113470000	113610000
12	2950000	3150000
12	124520000	124800000
12	123900000	124080000
12	118050000	118270000
12	121920000	122110000
12	111900000	112120000
12	120370000	120520000
12	51450000	51590000
12	52770000	52960000
12	7820000	7960000
12	121470000	121680000
12	125050000	125250000
12	110030000	110220000
12	3410000	3670000
12	96270000	96390000
12	5340000	5550000
12	121020000	121150000
12	94520000	94680000
12	5830000	6000000
12	1060000	1210000
13	112030000	113110000
13	107820000	108830000
13	74310000	75850000
13	114200000	115100000
13	47380000	48290000
13	85460000	86390000
13	76440000	77050000
13	36900000	37550000
13	80190000	80930000
13	40520000	41260000
13	43660000	44420000
13	102770000	103180000
13	21830000	22070000
13	97770000	98010000
13	65120000	65360000
13	78340000	78690000
13	27940000	28380000
13	24580000	24800000
13	33740000	34110000
13	79960000	80130000
13	45590000	45880000
13	25310000	25520000
13	26750000	26990000
13	75870000	76120000
13	32470000	32880000
13	44550000	45010000
13	51930000	52370000
13	96140000	96510000
13	103270000	103500000
13	30060000	30320000
13	27540000	27910000
13	47100000	47320000
13	36540000	36840000
13	39980000	40230000
13	41630000	41910000
13	76250000	76430000
13	28900000	29220000
13	59950000	60230000
13	100560000	100910000
13	109790000	109920000
13	108950000	109180000
13	21510000	21740000
13	96270000	96490000
13	49850000	50190000
13	28620000	28880000
13	34120000	34320000
13	27290000	27510000
13	99090000	99340000
13	101790000	102170000
13	50220000	50510000
13	20750000	21050000
13	73360000	73610000
13	95830000	96050000
13	45050000	45540000
13	28400000	28560000
13	45910000	46090000
13	41950000	42230000
13	110440000	110770000
13	77600000	77860000
13	110850000	111080000
13	42470000	42680000
13	97220000	97460000
13	42890000	43150000
13	49520000	49770000
13	30380000	30680000
13	25140000	25290000
13	103530000	103790000
13	39620000	39830000
13	80970000	81150000
13	48890000	49150000
13	48670000	48830000
13	31790000	31980000
13	33320000	33630000
13	71880000	72040000
13	100310000	100550000
13	29240000	29380000
13	51680000	51890000
13	22190000	22370000
13	44470000	44610000
13	113290000	113540000
13	49170000	49350000
13	43180000	43430000
13	110570000	110760000
13	51160000	51380000
13	34490000	34650000
13	97870000	98010000
13	61020000	61190000
13	103840000	104000000
13	95610000	95810000
13	31230000	31420000
13	27080000	27260000
13	21070000	21280000
13	111550000	111710000
13	46150000	46330000
13	113860000	114100000
13	99510000	99690000
13	102590000	102740000
13	111100000	111310000
13	31450000	31650000
13	51500000	51660000
13	113580000	113790000
13	100090000	100250000
13	110260000	110420000
14	40380000	42080000
14	71550000	72890000
14	38360000	39420000
14	62620000	63760000
14	30020000	30750000
14	29210000	30000000
14	86580000	87370000
14	57930000	58550000
14	79380000	80320000
14	56160000	56940000
14	80670000	81340000
14	71570000	72210000
14	36410000	36840000
14	87530000	88100000
14	64950000	65410000
14	59140000	59490000
14	60100000	60390000
14	86190000	86520000
14	57660000	57870000
14	25240000	25610000
14	60790000	61050000
14	24180000	24380000
14	75590000	76120000
14	70040000	70230000
14	37180000	37640000
14	21660000	21970000
14	82040000	82420000
14	104030000	104490000
14	20780000	21090000
14	91270000	91760000
14	45350000	45730000
14	24780000	24910000
14	77390000	77550000
14	32730000	32970000
14	99930000	100390000
14	59590000	59930000
14	39560000	39900000
14	89020000	89480000
14	76490000	77130000
14	67850000	68270000
14	61740000	61910000
14	81680000	81940000
14	97020000	97380000
14	34860000	35000000
14	50070000	50300000
14	75590000	75760000
14	60510000	60700000
14	67610000	67810000
14	23020000	23380000
14	55000000	55270000
14	85610000	86010000
14	62330000	62590000
14	61090000	61430000
14	72950000	73410000
14	95560000	96000000
14	37700000	38050000
14	73610000	73940000
14	91980000	92430000
14	61930000	62220000
14	88410000	88840000
14	63820000	64110000
14	58710000	58920000
14	69320000	69570000
14	51730000	52160000
14	33910000	34260000
14	42570000	42710000
14	68340000	68700000
14	93660000	94080000
14	35740000	35880000
14	99950000	100140000
14	88180000	88380000
14	34580000	34780000
14	35030000	35460000
14	50330000	50570000
14	61480000	61720000
14	92620000	93160000
14	24920000	25160000
14	35910000	36260000
14	99250000	99710000
14	105830000	105990000
14	70280000	70510000
14	37410000	37610000
14	104600000	105100000
14	93380000	93620000
14	52750000	52940000
14	34310000	34570000
14	90750000	91210000
14	68750000	69290000
14	53260000	53450000
14	35520000	35880000
14	64480000	64780000
14	91640000	91760000
14	104180000	104510000
14	96750000	96910000
14	102840000	103410000
14	52250000	52430000
14	31640000	31830000
14	36540000	36840000
14	21160000	21430000
14	104020000	104180000
14	73950000	74120000
14	69660000	69930000
14	75340000	75560000
14	67880000	68030000
14	54640000	54810000
14	74160000	74350000
14	31370000	31580000
14	21440000	21590000
14	96020000	96450000
14	65620000	65870000
14	55900000	56140000
14	81420000	81660000
14	51420000	51690000
14	101710000	102120000
14	68920000	69280000
14	100160000	100370000
14	75040000	75300000
14	102160000	102410000
14	90430000	90710000
14	35070000	35250000
14	91330000	91630000
14	28880000	29080000
14	51010000	51330000
14	96540000	96740000
14	75770000	76110000
14	52450000	52610000
14	72970000	73170000
14	76140000	76470000
14	39630000	39790000
14	90200000	90380000
14	93810000	94080000
14	100440000	100670000
14	103540000	103780000
14	65880000	66110000
14	95570000	95880000
14	55490000	55650000
14	50780000	51000000
14	64800000	64960000
14	32540000	32680000
14	89080000	89360000
14	94120000	94360000
14	101370000	101600000
14	102420000	102550000
14	77580000	77780000
14	65250000	65370000
14	101130000	101310000
14	97040000	97210000
14	64270000	64460000
14	100850000	101110000
14	102560000	102820000
14	78470000	78840000
14	99750000	99910000
14	71280000	71440000
14	23400000	23550000
14	74810000	74940000
14	50590000	50760000
14	22850000	23000000
14	55670000	55870000
14	36350000	36530000
14	68040000	68170000
14	76880000	77130000
14	74560000	74730000
14	53110000	53250000
14	96020000	96240000
14	92920000	93150000
14	103160000	103390000
14	77150000	77320000
14	92460000	92620000
14	59140000	59290000
14	103800000	103960000
14	105660000	105820000
14	54460000	54630000
14	91370000	91510000
14	105210000	105350000
15	54250000	55460000
15	29100000	29940000
15	53050000	54070000
15	79620000	80660000
15	81690000	82530000
15	56760000	57600000
15	49730000	50340000
15	87450000	88170000
15	85110000	85720000
15	69760000	70920000
15	31190000	31440000
15	59440000	59760000
15	44170000	44520000
15	56550000	56710000
15	33590000	33950000
15	59810000	59950000
15	39460000	39870000
15	95190000	95520000
15	62150000	62350000
15	55470000	55730000
15	75650000	75980000
15	91580000	91810000
15	31490000	31780000
15	100450000	100790000
15	78230000	78540000
15	98440000	98720000
15	37170000	37430000
15	68190000	68480000
15	60630000	60810000
15	44860000	45090000
15	66650000	66820000
15	90270000	90430000
15	78880000	79130000
15	46360000	46570000
15	74910000	75240000
15	48300000	48600000
15	34060000	34320000
15	29960000	30360000
15	72120000	72450000
15	38730000	38980000
15	86400000	86680000
15	89580000	89730000
15	69320000	69700000
15	56180000	56390000
15	99630000	99770000
15	67750000	68120000
15	73840000	74000000
15	39920000	40060000
15	68840000	68980000
15	77860000	78170000
15	70960000	71180000
15	25550000	25690000
15	83490000	83670000
15	94700000	94880000
15	57620000	57830000
15	41190000	41630000
15	83210000	83680000
15	64460000	64660000
15	92390000	92620000
15	89880000	90010000
15	89870000	90120000
15	101150000	101410000
15	64190000	64360000
15	52850000	53020000
15	58510000	58870000
15	60040000	60220000
15	101560000	101800000
15	71740000	72030000
15	86770000	86990000
15	40310000	40500000
15	67220000	67490000
15	51010000	51190000
15	48640000	48790000
15	99800000	99940000
15	83910000	84090000
15	91890000	92170000
15	74910000	75060000
15	52230000	52510000
15	76470000	76640000
15	45740000	45910000
15	43010000	43230000
15	65910000	66150000
15	89420000	89560000
15	41720000	42050000
15	52580000	52830000
15	50440000	50620000
15	74650000	74900000
15	78580000	78720000
15	48010000	48270000
15	80710000	81060000
15	94530000	94670000
15	42500000	42760000
15	90660000	90810000
15	99190000	99450000
15	61950000	62120000
15	90840000	91030000
15	75060000	75240000
15	81070000	81270000
15	89010000	89170000
15	64700000	64970000
15	66200000	66570000
15	66870000	67160000
15	89220000	89390000
15	102030000	102190000
15	63040000	63380000
15	90440000	90630000
15	78400000	78550000
15	59210000	59410000
15	42270000	42450000
15	51440000	51680000
15	52080000	52200000
15	63580000	63730000
15	65010000	65250000
15	79320000	79580000
15	99040000	99180000
15	101840000	102020000
15	80850000	81060000
15	33300000	33460000
15	40580000	40810000
15	63750000	63890000
15	68340000	68460000
15	41040000	41180000
15	99470000	99620000
15	44360000	44510000
15	41880000	42040000
15	42050000	42220000
16	25280000	27140000
16	75700000	77220000
16	6730000	8360000
16	16860000	18160000
16	34180000	35270000
16	87980000	88630000
16	59430000	60350000
16	52190000	53050000
16	65150000	66350000
16	61560000	62210000
16	51110000	51800000
16	48700000	49390000
16	5670000	6210000
16	89760000	90150000
16	3720000	4300000
16	2020000	2190000
16	27650000	28050000
16	15960000	16170000
16	19130000	19520000
16	30450000	30620000
16	14380000	14630000
16	74720000	75200000
16	20800000	21090000
16	58830000	59210000
16	66920000	67500000
16	48390000	48670000
16	69170000	69330000
16	2760000	3000000
16	15920000	16290000
16	81920000	82270000
16	74010000	74310000
16	55940000	56380000
16	19390000	19530000
16	12030000	12170000
16	55490000	55730000
16	72520000	72800000
16	47740000	48210000
16	50400000	50840000
16	49430000	49960000
16	19940000	20230000
16	86580000	87330000
16	14000000	14320000
16	27160000	27420000
16	77680000	78040000
16	70360000	70550000
16	87780000	87940000
16	58540000	58780000
16	10350000	10590000
16	1360000	1840000
16	78140000	78300000
16	86080000	86560000
16	68440000	68870000
16	57560000	58050000
16	80010000	80410000
16	71670000	72050000
16	84110000	84520000
16	87420000	87700000
16	2320000	2480000
16	75230000	75450000
16	24550000	24810000
16	8990000	9230000
16	24050000	24510000
16	83960000	84100000
16	85840000	86050000
16	73590000	73930000
16	23730000	24040000
16	85130000	85710000
16	50050000	50390000
16	83640000	83830000
16	19570000	19890000
16	10840000	11030000
16	4740000	5140000
16	74980000	75170000
16	860000	1320000
16	10610000	10820000
16	77260000	77620000
16	68910000	69150000
16	56470000	56770000
16	11480000	11820000
16	51810000	52020000
16	66970000	67190000
16	69390000	69730000
16	89620000	89760000
16	86600000	86760000
16	3230000	3530000
16	80550000	80880000
16	68550000	68870000
16	81400000	81760000
16	57330000	57470000
16	11050000	11350000
16	1850000	2000000
16	89360000	89590000
16	31210000	31460000
16	58360000	58520000
16	30710000	30950000
16	57580000	57770000
16	69800000	69970000
16	30970000	31190000
16	86330000	86550000
16	54670000	55000000
16	84790000	85000000
16	81060000	81380000
16	88880000	89270000
16	57780000	58040000
16	74720000	74910000
16	72840000	73230000
16	85680000	85830000
16	66370000	66630000
16	6070000	6230000
16	23190000	23440000
16	23460000	23690000
16	12600000	12920000
16	55010000	55290000
16	67280000	67500000
16	85440000	85660000
16	67520000	67700000
16	5800000	6050000
16	68730000	68870000
16	75470000	75650000
16	53770000	53940000
16	11820000	11970000
16	870000	1140000
16	3040000	3220000
16	68100000	68260000
16	10110000	10320000
16	87110000	87330000
16	29860000	30030000
16	84540000	84760000
16	71420000	71560000
16	53980000	54220000
16	19710000	19890000
16	19200000	19380000
16	49450000	49630000
16	4310000	4470000
16	81070000	81250000
16	84250000	84510000
16	260000	410000
16	55310000	55460000
16	89790000	89970000
16	3730000	3940000
16	56880000	57200000
16	1660000	1820000
16	85130000	85300000
16	71800000	72000000
16	430000	560000
16	68400000	68550000
16	79600000	79790000
16	3550000	3710000
16	68560000	68710000
17	45010000	45870000
17	67490000	68600000
17	33460000	34170000
17	69050000	70110000
17	10660000	11840000
17	58770000	59470000
17	12070000	12910000
17	8810000	9460000
17	67530000	68140000
17	57350000	57550000
17	74740000	75240000
17	41410000	41560000
17	35040000	35330000
17	32800000	33240000
17	73900000	74330000
17	32110000	32470000
17	16880000	17140000
17	13490000	13830000
17	71420000	72170000
17	21200000	21420000
17	64190000	64670000
17	29230000	29540000
17	15180000	15370000
17	70730000	71180000
17	18090000	18260000
17	77760000	77960000
17	53120000	53380000
17	77160000	77350000
17	17570000	17990000
17	43330000	43470000
17	30780000	31090000
17	43710000	43880000
17	29870000	30170000
17	54880000	55160000
17	79480000	79620000
17	56380000	56530000
17	59950000	60180000
17	59480000	59660000
17	53600000	53850000
17	1150000	1540000
17	71210000	71370000
17	29710000	29860000
17	11880000	12050000
17	2690000	2930000
17	44110000	44250000
17	37700000	38130000
17	70550000	70720000
17	75520000	76010000
17	61490000	61800000
17	78390000	78940000
17	42460000	42780000
17	53430000	53590000
17	63220000	63540000
17	7600000	7960000
17	42840000	43190000
17	65370000	65700000
17	42280000	42430000
17	660000	890000
17	37150000	37310000
17	54630000	54850000
17	36880000	37080000
17	59700000	59920000
17	78030000	78350000
17	80200000	80560000
17	7250000	7490000
17	66760000	66960000
17	19880000	20010000
17	49420000	49620000
17	19410000	19690000
17	54880000	55060000
17	70120000	70530000
17	66250000	66450000
17	31350000	31650000
17	10230000	10510000
17	79220000	79470000
17	47490000	47630000
17	46720000	46960000
17	38570000	38720000
17	39850000	40060000
17	2320000	2600000
17	8290000	8670000
17	6930000	7100000
17	66510000	66750000
17	38760000	38950000
17	6560000	6910000
17	1780000	1940000
17	41160000	41390000
17	76810000	77000000
17	17220000	17550000
17	27930000	28110000
17	73280000	73410000
17	58530000	58720000
17	47910000	48080000
17	49070000	49230000
17	29550000	29700000
17	3610000	3990000
17	5490000	5860000
17	27280000	27440000
17	25520000	25670000
17	47650000	47770000
17	74750000	75060000
17	9860000	10160000
17	61490000	61680000
17	40460000	40680000
17	64710000	65050000
17	27050000	27260000
17	4610000	4810000
17	60770000	61040000
17	65100000	65350000
17	25680000	25930000
17	1960000	2190000
17	27620000	27880000
17	48240000	48410000
17	42960000	43190000
17	40730000	40850000
17	14860000	15060000
17	6180000	6330000
17	57120000	57280000
17	72350000	72490000
17	75300000	75490000
17	32530000	32690000
17	17240000	17400000
17	76460000	76730000
17	14620000	14840000
17	41590000	41840000
17	37750000	37910000
17	9470000	9650000
17	48830000	49050000
17	46430000	46680000
17	74510000	74720000
17	17780000	17940000
17	31100000	31240000
17	75070000	75240000
17	76240000	76430000
17	6340000	6540000
17	48550000	48790000
17	42590000	42770000
17	80300000	80540000
17	920000	1110000
17	37920000	38090000
17	4090000	4310000
17	7800000	7960000
17	38150000	38320000
17	74110000	74280000
17	6750000	6910000
17	17570000	17730000
17	80600000	80720000
17	73030000	73210000
17	46230000	46420000
17	1240000	1420000
17	75760000	75960000
17	75520000	75690000
17	20920000	21150000
17	1580000	1770000
17	80740000	80880000
17	27460000	27610000
17	55320000	55520000
17	47120000	47300000
17	45910000	46090000
17	3800000	3990000
18	52890000	54260000
18	64870000	66380000
18	70360000	71800000
18	44570000	45280000
18	54400000	55230000
18	20710000	21000000
18	33320000	33500000
18	48330000	48520000
18	47020000	47400000
18	11270000	11570000
18	47740000	47910000
18	3740000	4040000
18	74500000	74680000
18	20370000	20550000
18	21160000	21400000
18	660000	850000
18	56180000	56420000
18	32800000	32950000
18	56440000	56740000
18	3260000	3670000
18	9970000	10510000
18	43240000	43460000
18	34900000	35140000
18	2820000	3240000
18	9560000	9950000
18	43700000	43840000
18	29130000	29300000
18	18770000	19080000
18	33560000	33860000
18	13180000	13640000
18	28990000	29110000
18	23940000	24220000
18	55280000	55520000
18	280000	580000
18	51430000	51650000
18	71850000	72010000
18	77440000	77730000
18	8650000	9020000
18	21520000	21710000
18	19170000	19430000
18	3270000	3450000
18	2570000	2790000
18	12380000	12670000
18	45290000	45520000
18	56890000	57070000
18	45990000	46180000
18	45740000	45970000
18	7810000	8010000
18	12710000	12940000
18	19490000	19730000
18	10850000	11050000
18	77140000	77280000
18	46200000	46470000
18	42260000	42470000
18	280000	460000
18	19180000	19330000
18	12960000	13130000
18	45550000	45720000
18	8430000	8600000
18	8060000	8300000
18	55850000	56000000
18	9360000	9520000
18	8840000	8990000
1	4130000	5550000
1	215870000	218370000
1	6760000	7720000
1	118550000	120080000
1	69020000	70250000
1	163330000	165040000
1	82460000	83160000
1	60430000	61270000
1	36940000	38140000
1	96670000	97300000
1	169860000	170910000
1	215950000	216800000
1	236760000	237580000
1	63310000	63920000
1	95770000	96480000
1	34090000	35200000
1	146490000	147390000
1	214830000	215730000
1	59160000	60250000
1	213400000	214370000
1	231830000	232750000
1	198700000	199450000
1	245270000	246170000
1	210600000	211310000
1	38480000	39300000
1	230750000	231370000
1	218490000	219240000
1	36980000	37900000
1	216900000	217510000
1	229790000	230450000
1	41050000	41440000
1	203830000	204350000
1	68570000	68840000
1	224300000	224520000
1	166440000	166750000
1	182940000	183210000
1	9310000	9510000
1	85410000	85720000
1	173380000	173750000
1	162580000	162760000
1	241760000	242000000
1	115670000	116020000
1	171970000	172380000
1	17390000	17730000
1	12380000	12690000
1	220440000	220820000
1	84390000	84570000
1	172780000	173180000
1	227210000	227630000
1	99980000	100170000
1	198460000	198660000
1	162820000	163130000
1	174720000	174960000
1	25180000	25530000
1	2350000	2480000
1	207350000	207590000
1	231470000	231740000
1	62670000	62890000
1	89140000	89350000
1	222910000	223250000
1	112950000	113240000
1	101500000	101760000
1	197580000	197880000
1	173840000	174210000
1	151370000	151830000
1	222360000	222620000
1	36550000	36910000
1	179660000	179790000
1	224680000	225080000
1	161740000	162010000
1	236260000	236720000
1	92460000	92720000
1	26910000	27210000
1	116670000	117040000
1	179040000	179340000
1	22440000	22980000
1	157140000	157480000
1	180930000	181140000
1	111990000	112290000
1	14930000	15380000
1	182420000	182790000
1	246180000	246640000
1	21540000	21690000
1	21540000	21980000
1	196100000	196280000
1	185310000	185650000
1	184310000	184660000
1	212230000	212540000
1	169380000	169520000
1	200530000	200820000
1	165720000	165880000
1	220990000	221390000
1	233570000	233920000
1	177920000	178260000
1	6290000	6490000
1	58970000	59130000
1	202400000	202690000
1	67990000	68220000
1	19200000	19400000
1	169090000	169320000
1	113380000	113640000
1	77610000	78000000
1	201960000	202110000
1	66710000	66910000
1	94080000	94310000
1	182810000	183210000
1	182540000	182760000
1	74990000	75160000
1	180470000	180830000
1	84920000	85230000
1	66930000	67190000
1	68300000	68530000
1	77350000	77560000
1	90260000	90470000
1	169530000	169780000
1	12130000	12290000
1	95040000	95260000
1	214510000	214800000
1	57070000	57260000
1	33570000	33960000
1	186430000	186640000
1	40540000	40870000
1	117270000	117600000
1	78440000	78590000
1	21190000	21520000
1	235290000	235640000
1	20830000	20970000
1	167680000	168050000
1	26360000	26790000
1	24510000	24710000
1	44210000	44420000
1	228780000	229350000
1	182040000	182370000
1	15430000	15840000
1	24970000	25170000
1	41290000	41440000
1	209740000	209970000
1	204360000	204480000
1	192760000	192980000
1	227660000	227900000
1	114340000	114500000
1	166840000	167020000
1	40260000	40520000
1	111160000	111330000
1	46490000	46700000
1	36770000	36910000
1	202130000	202300000
1	160960000	161120000
1	111740000	111940000
1	22010000	22390000
1	6070000	6250000
1	44820000	45090000
1	94660000	94800000
1	179820000	180140000
1	201810000	201940000
1	197140000	197340000
1	23000000	23250000
1	45290000	45470000
1	203450000	203770000
1	87580000	87750000
1	151860000	152010000
1	28390000	28550000
1	31190000	31400000
1	184760000	184950000
1	220140000	220380000
1	247110000	247370000
1	58200000	58440000
1	183250000	183590000
1	172390000	172700000
1	67440000	67640000
1	108080000	108290000
1	234240000	234470000
1	114510000	114830000
1	31860000	32040000
1	39560000	39730000
1	210300000	210540000
1	27290000	27610000
1	178750000	178980000
1	150520000	150890000
1	152620000	152820000
1	165350000	165560000
1	165070000	165330000
1	19640000	19980000
1	61290000	61500000
1	93300000	93470000
1	85240000	85400000
1	35340000	35640000
1	209370000	209680000
1	10550000	11050000
1	62380000	62590000
1	39310000	39520000
1	43370000	43540000
1	54300000	54510000
1	45480000	45760000
1	67690000	67970000
1	118300000	118470000
1	48230000	48540000
1	210020000	210170000
1	228300000	228740000
1	160640000	160940000
1	26150000	26340000
1	211850000	212190000
1	1690000	1830000
1	84700000	84900000
1	206890000	207170000
1	152880000	153190000
1	54560000	54970000
1	225650000	225960000
1	116330000	116570000
1	212630000	212810000
1	11360000	11700000
1	18910000	19170000
1	234010000	234200000
1	15440000	15600000
1	52550000	52800000
1	17800000	17970000
1	52260000	52500000
1	227930000	228140000
1	1280000	1440000
1	201210000	201340000
1	175120000	175280000
1	167030000	167200000
1	160390000	160600000
1	180240000	180450000
1	850000	1000000
1	178270000	178480000
1	28560000	28830000
1	16390000	16560000
1	181150000	181400000
1	3350000	3540000
1	47900000	48190000
1	46870000	47010000
1	245010000	245210000
1	29210000	29440000
1	16100000	16310000
1	36310000	36540000
1	178500000	178710000
1	42270000	42520000
1	110320000	110520000
1	53920000	54180000
1	65520000	65680000
1	53700000	53890000
1	153760000	153950000
1	95290000	95520000
1	160030000	160310000
1	15620000	15770000
1	183620000	183890000
1	200250000	200480000
1	201500000	201790000
1	40050000	40240000
1	32080000	32260000
1	27730000	27950000
1	51980000	52230000
1	2120000	2310000
1	41720000	41960000
1	52880000	53150000
1	23300000	23600000
1	62160000	62320000
1	154530000	154890000
1	41050000	41290000
1	202710000	202970000
1	208190000	208430000
1	25910000	26130000
1	32890000	33100000
1	118070000	118290000
1	36560000	36750000
1	205050000	205220000
1	221910000	222170000
1	154900000	155050000
1	22750000	22970000
1	171770000	171940000
1	219790000	219990000
1	235990000	236150000
1	203830000	204090000
1	64390000	64590000
1	24750000	24960000
1	116150000	116320000
1	55530000	55730000
1	156610000	156930000
1	246660000	246950000
1	155300000	155570000
1	33350000	33540000
1	199650000	199910000
1	23840000	24010000
1	19430000	19570000
1	229390000	229620000
1	36030000	36230000
1	20510000	20810000
1	15850000	16080000
1	205320000	205490000
1	235670000	235940000
1	226290000	226580000
1	225970000	226170000
1	204510000	204770000
1	115680000	115850000
1	11080000	11320000
1	33120000	33290000
1	167520000	167670000
1	11840000	12090000
1	110720000	110860000
1	193100000	193300000
1	20230000	20470000
1	32650000	32850000
1	203000000	203200000
1	244460000	244610000
1	153470000	153630000
1	22440000	22730000
1	30920000	31170000
1	154280000	154520000
1	224690000	224830000
1	204120000	204350000
1	65300000	65500000
1	208010000	208170000
1	20020000	20200000
1	41500000	41690000
1	38310000	38440000
1	153290000	153460000
1	156050000	156260000
1	1010000	1220000
1	95550000	95710000
1	211690000	211830000
1	244770000	244960000
1	226810000	227010000
1	201520000	201660000
1	150040000	150160000
1	20690000	20810000
1	28160000	28330000
1	212970000	213170000
1	55340000	55510000
1	11530000	11700000
1	184970000	185130000
1	177140000	177320000
1	171580000	171740000
1	32280000	32460000
1	42030000	42250000
1	30390000	30570000
1	244220000	244430000
1	203290000	203440000
1	156310000	156580000
1	27430000	27610000
1	155890000	156030000
1	177760000	177900000
1	26590000	26750000
1	31650000	31830000
1	15230000	15380000
1	156740000	156930000
1	200100000	200240000
1	200920000	201070000
1	226600000	226770000
1	53520000	53640000
20	53280000	54790000
20	7960000	8710000
20	58640000	60490000
20	18590000	19590000
20	40340000	42040000
20	16780000	17430000
20	10640000	11250000
20	23420000	23620000
20	52840000	53260000
20	11260000	11540000
20	19760000	19960000
20	52230000	52560000
20	4720000	5080000
20	42830000	43280000
20	61580000	62100000
20	32910000	33100000
20	11650000	11960000
20	21210000	21490000
20	39590000	39750000
20	49400000	49580000
20	1270000	1450000
20	62150000	62610000
20	6870000	7070000
20	37170000	37550000
20	48550000	48720000
20	50250000	50730000
20	19660000	19990000
20	35230000	35570000
20	35840000	36170000
20	4580000	4720000
20	4190000	4570000
20	55120000	55580000
20	10410000	10630000
20	22300000	22660000
20	56800000	57270000
20	44630000	45060000
20	12900000	13090000
20	22660000	22960000
20	44410000	44590000
20	5200000	5470000
20	22320000	22440000
20	56170000	56780000
20	24950000	25180000
20	47930000	48140000
20	51870000	52160000
20	47610000	47880000
20	49230000	49380000
20	32280000	32710000
20	43930000	44110000
20	30100000	30360000
20	34550000	34740000
20	5530000	5760000
20	780000	940000
20	35880000	36020000
20	33120000	33360000
20	9380000	9590000
20	3310000	3620000
20	6540000	6750000
20	45830000	46270000
20	55940000	56160000
20	51380000	51720000
20	17660000	17910000
20	530000	720000
20	18000000	18260000
20	23010000	23320000
20	42060000	42330000
20	36670000	37040000
20	31080000	31240000
20	2450000	2640000
20	44170000	44390000
20	20340000	20570000
20	42370000	42710000
20	2670000	3020000
20	46020000	46260000
20	47260000	47530000
20	36040000	36170000
20	45370000	45800000
20	24540000	24780000
20	52370000	52550000
20	36180000	36640000
20	33430000	33600000
20	320000	490000
20	35580000	35800000
20	57440000	57610000
20	56800000	57020000
20	55660000	55920000
20	31470000	31880000
20	45840000	46010000
20	49980000	50220000
20	48220000	48510000
20	1740000	1910000
20	34330000	34530000
20	30400000	30680000
20	45100000	45310000
20	32510000	32710000
20	43100000	43260000
20	39770000	39970000
20	58130000	58320000
20	60530000	60710000
20	1930000	2160000
20	43740000	43910000
20	32080000	32240000
20	39350000	39580000
20	48800000	49080000
20	37250000	37530000
20	49600000	49920000
20	33870000	34030000
20	3890000	4070000
20	42840000	42960000
20	4740000	4930000
20	30790000	31030000
20	50250000	50420000
20	33680000	33850000
20	44600000	44740000
20	2670000	2830000
20	51440000	51610000
20	47010000	47240000
20	37730000	37890000
20	57050000	57260000
20	3740000	3880000
20	34050000	34240000
20	62160000	62320000
20	5780000	5920000
20	61930000	62120000
20	62340000	62500000
Y	9930000	13860000
19	36810000	38320000
19	57970000	58650000
[truncated: 1,723 more rows]

## Sheet: NP69
Supplementary Table S4: TADs called by Arrowhead from Hi-C libraries
#chr	x1	x2
9	7230000	9950000
9	2120000	2780000
9	73240000	73880000
9	29980000	30840000
9	122150000	123120000
9	92900000	93560000
9	81920000	82680000
9	103370000	104140000
9	111650000	112280000
9	113390000	114100000
9	81200000	81740000
9	111680000	112180000
9	110180000	111040000
9	123340000	123890000
9	107520000	108200000
9	96820000	96950000
9	87270000	87890000
9	77870000	78480000
9	126210000	126810000
9	139370000	139600000
9	71250000	71610000
9	140760000	140960000
9	133350000	133550000
9	13420000	14070000
9	124850000	125210000
9	97420000	97890000
9	36790000	37400000
9	10030000	10310000
9	135240000	135840000
9	33090000	33230000
9	133970000	134370000
9	124860000	125110000
9	100450000	100730000
9	77370000	77690000
9	101940000	102540000
9	134410000	134620000
9	72020000	72180000
9	99450000	99610000
9	14450000	14780000
9	37900000	38360000
9	21810000	22250000
9	130230000	130680000
9	4380000	4650000
9	72920000	73220000
9	136630000	136860000
9	21180000	21450000
9	19040000	19180000
9	32360000	32570000
9	850000	1010000
9	25990000	26330000
9	79360000	79760000
9	118340000	118910000
9	115160000	115580000
9	138860000	139010000
9	5780000	6030000
9	610000	790000
9	131390000	131810000
9	90760000	91190000
9	6050000	6310000
9	140180000	140420000
9	4750000	4990000
9	6350000	6570000
9	91940000	92180000
9	114680000	114840000
9	124290000	124810000
9	32580000	32980000
9	27320000	27540000
9	37900000	38070000
9	127630000	128140000
9	12700000	12890000
9	126840000	127100000
9	37470000	37860000
9	22280000	22460000
9	3730000	3970000
9	112950000	113380000
9	79050000	79320000
9	99090000	99430000
9	19040000	19460000
9	117150000	117410000
9	75470000	75660000
9	100210000	100380000
9	127170000	127520000
9	133570000	133730000
9	17520000	17780000
9	136050000	136200000
9	5440000	5590000
9	19480000	19890000
9	18230000	18680000
9	28740000	29170000
9	125590000	125780000
9	116840000	117080000
9	96440000	96750000
9	86550000	86930000
9	75840000	76210000
9	134640000	135130000
9	132390000	132570000
9	14110000	14370000
9	133570000	133920000
9	103070000	103360000
9	17090000	17460000
9	135900000	136030000
9	104160000	104330000
9	125230000	125570000
9	19920000	20340000
9	21500000	21790000
9	27700000	28070000
9	79390000	79610000
9	33600000	33720000
9	139670000	139930000
9	93660000	94190000
9	72560000	72860000
9	4050000	4350000
9	38410000	38590000
9	23510000	23850000
9	130690000	130870000
9	35110000	35460000
9	78500000	78930000
9	123960000	124180000
9	114490000	114840000
9	22000000	22240000
9	94510000	94790000
9	88630000	88880000
9	112650000	112930000
9	111190000	111330000
9	90290000	90510000
9	131880000	132380000
9	125840000	126120000
9	72560000	72730000
9	135150000	135270000
9	109930000	110120000
9	137970000	138300000
9	5170000	5390000
9	121600000	121950000
9	95080000	95390000
9	137650000	137910000
9	118940000	119420000
9	34380000	34630000
9	116180000	116430000
9	103070000	103230000
9	26720000	26990000
9	21810000	21970000
9	74900000	75210000
9	139940000	140150000
9	21550000	21680000
9	132600000	132850000
9	36210000	36370000
9	27030000	27270000
9	101060000	101540000
9	129330000	129560000
9	74650000	74880000
9	107530000	107910000
9	33940000	34280000
9	94880000	95050000
9	32580000	32750000
9	34670000	35050000
9	95910000	96070000
9	114860000	115130000
9	117800000	118300000
9	119460000	119770000
9	35600000	35910000
9	129680000	129960000
9	137360000	137580000
9	117430000	117770000
9	15860000	16160000
9	120400000	120550000
9	91220000	91610000
9	91650000	91900000
9	101570000	101910000
9	15190000	15430000
9	89950000	90270000
9	100820000	101040000
9	116470000	116810000
9	36850000	37020000
9	138700000	138840000
9	118350000	118620000
9	112320000	112620000
9	127950000	128140000
9	131580000	131740000
9	110240000	110600000
9	95420000	95570000
9	106920000	107160000
9	102780000	103020000
9	18240000	18450000
9	93660000	94070000
9	31100000	31360000
9	23680000	23830000
9	72270000	72540000
9	127650000	127920000
9	123350000	123500000
9	74420000	74620000
9	15450000	15630000
9	20620000	20900000
9	16240000	16590000
9	37040000	37380000
9	133930000	134210000
9	127310000	127510000
9	33350000	33520000
9	3230000	3430000
9	80040000	80360000
9	36400000	36570000
9	120930000	121240000
9	81420000	81700000
9	123510000	123710000
9	121280000	121570000
9	101600000	101750000
9	38080000	38360000
9	129020000	129220000
9	74210000	74390000
9	26160000	26330000
9	129970000	130200000
9	113200000	113380000
9	107920000	108170000
9	113400000	113790000
9	75230000	75430000
9	87010000	87260000
9	78730000	78910000
9	131930000	132090000
9	85930000	86190000
9	98770000	98970000
9	94200000	94460000
9	71860000	72000000
9	130500000	130680000
9	15650000	15810000
9	72390000	72530000
9	113810000	114060000
9	80390000	80650000
9	111930000	112140000
9	102560000	102730000
9	118640000	118900000
9	116040000	116170000
9	79780000	80010000
9	27720000	27890000
9	135280000	135460000
9	111350000	111520000
9	34090000	34250000
9	76290000	76500000
9	33730000	33910000
9	138490000	138670000
9	102050000	102250000
9	114520000	114660000
9	134220000	134380000
9	91010000	91190000
9	81210000	81390000
9	98480000	98700000
9	121730000	121880000
9	20160000	20330000
9	89540000	89700000
9	89250000	89460000
9	114350000	114490000
10	37200000	38650000
10	65670000	69310000
10	82400000	85850000
10	132000000	133370000
10	110350000	111610000
10	116990000	118170000
10	112910000	113890000
10	44220000	44900000
10	49860000	50720000
10	52700000	53970000
10	45480000	46170000
10	3820000	4840000
10	26020000	26850000
10	30990000	31790000
10	28910000	29620000
10	99500000	99870000
10	50830000	50980000
10	16980000	17280000
10	28030000	28510000
10	69580000	70090000
10	24980000	25270000
10	89590000	90160000
10	95090000	95270000
10	79580000	79780000
10	59420000	59850000
10	111910000	112050000
10	122140000	122460000
10	14910000	15150000
10	54090000	54350000
10	102910000	103330000
10	93090000	93500000
10	86020000	86300000
10	91000000	91160000
10	120910000	121250000
10	112360000	112680000
10	129670000	129940000
10	115540000	115870000
10	104480000	104830000
10	61380000	61830000
10	112070000	112320000
10	109160000	109540000
10	24490000	24820000
10	5520000	5670000
10	109960000	110240000
10	121330000	121650000
10	120320000	120790000
10	12280000	12730000
10	92650000	93030000
10	81120000	81260000
10	6240000	6440000
10	43050000	43300000
10	54060000	54240000
10	111660000	111870000
10	134700000	134940000
10	124790000	125310000
10	12760000	13130000
10	75580000	75860000
10	30660000	30890000
10	18220000	18540000
10	63510000	64010000
10	125330000	125720000
10	108140000	108360000
10	93800000	94210000
10	70980000	71160000
10	116610000	116890000
10	22860000	23280000
10	6130000	6440000
10	105650000	106010000
10	7540000	7760000
10	106140000	106380000
10	118560000	118930000
10	78920000	79470000
10	76860000	76990000
10	92480000	92630000
10	3230000	3800000
10	2920000	3090000
10	10740000	11070000
10	15200000	15430000
10	54560000	54940000
10	82140000	82290000
10	940000	1110000
10	43620000	43960000
10	13180000	13380000
10	73060000	73470000
10	11530000	11790000
10	16600000	16800000
10	6470000	6690000
10	97760000	98100000
10	15470000	15790000
10	129300000	129650000
10	28510000	28680000
10	64930000	65530000
10	71920000	72160000
10	13830000	14210000
10	105460000	105630000
10	35520000	35850000
10	74120000	74640000
10	80830000	80950000
10	102040000	102280000
10	14540000	14870000
10	75870000	75990000
10	45070000	45360000
10	29860000	30250000
10	13680000	13820000
10	96940000	97120000
10	16870000	17290000
10	48300000	48660000
10	99500000	99650000
10	91180000	91330000
10	17310000	17470000
10	103580000	103840000
10	131230000	131440000
10	43360000	43580000
10	105150000	105350000
10	24890000	25370000
10	54370000	54540000
10	90760000	90970000
10	87300000	87550000
10	60160000	60520000
10	95280000	95440000
10	72660000	73040000
10	23590000	23800000
10	134270000	134450000
10	116300000	116580000
10	61840000	61980000
10	76450000	76850000
10	70730000	70900000
10	61000000	61340000
10	101620000	101800000
10	97150000	97360000
10	124520000	124730000
10	98790000	98990000
10	14230000	14520000
10	24670000	24810000
10	72310000	72510000
10	23430000	23580000
10	32120000	32320000
10	124030000	124190000
10	94840000	95050000
10	11820000	12050000
10	102310000	102640000
10	104860000	105060000
10	43980000	44150000
10	97430000	97620000
10	70520000	70690000
10	34940000	35270000
10	123680000	123970000
10	88450000	88670000
10	99200000	99410000
10	119260000	119530000
10	95660000	96020000
10	21150000	21340000
10	99900000	100170000
10	103920000	104140000
10	107240000	107440000
10	96080000	96300000
10	63060000	63490000
10	34950000	35110000
10	101190000	101370000
10	62200000	62420000
10	30300000	30570000
10	112490000	112660000
10	31800000	32110000
10	62200000	62530000
10	64370000	64570000
10	106820000	107040000
10	103350000	103540000
10	116050000	116200000
10	22050000	22250000
10	64010000	64190000
10	114710000	114890000
10	93510000	93690000
10	34750000	34920000
10	13390000	13630000
10	109660000	109840000
10	126220000	126430000
10	2120000	2340000
10	73660000	73810000
10	69810000	69960000
10	62570000	62780000
10	99670000	99850000
10	21560000	21770000
10	290000	490000
10	17500000	17620000
10	77010000	77150000
10	122170000	122360000
10	93250000	93460000
10	100220000	100440000
10	33480000	33610000
10	8090000	8280000
10	27650000	27840000
10	63800000	64000000
10	49550000	49730000
10	78060000	78300000
10	21360000	21550000
10	61600000	61800000
10	90320000	90570000
10	62020000	62190000
10	33300000	33460000
10	70260000	70480000
10	94240000	94400000
10	36700000	36910000
10	114080000	114200000
10	98550000	98750000
10	21830000	22010000
10	32330000	32500000
10	24270000	24470000
10	29870000	30010000
10	20100000	20340000
10	74990000	75150000
10	127670000	127820000
10	24490000	24650000
10	76010000	76170000
10	60540000	60700000
10	71520000	71690000
10	79250000	79400000
10	126840000	127030000
10	74420000	74610000
10	22860000	23010000
10	95460000	95620000
10	94640000	94810000
10	90160000	90310000
10	25090000	25270000
10	73840000	73980000
10	123000000	123180000
11	83540000	85120000
11	114520000	116560000
11	91320000	92590000
11	900000	1550000
11	126460000	127690000
11	54790000	56550000
11	130880000	134870000
11	20730000	22190000
11	81000000	82310000
11	79380000	80760000
11	68860000	69480000
11	18100000	18780000
11	110340000	111120000
11	119350000	119990000
11	8200000	8590000
11	60690000	60960000
11	101350000	101680000
11	6000000	6380000
11	128020000	128340000
11	102210000	102530000
11	66140000	66600000
11	27770000	28080000
11	3890000	4110000
11	27190000	27520000
11	93010000	93280000
11	47970000	48150000
11	120380000	120830000
11	122110000	122410000
11	4690000	5030000
11	45440000	45710000
11	5180000	5420000
11	70800000	71130000
11	59580000	59930000
11	26770000	27170000
11	122970000	123130000
11	122730000	122910000
11	61560000	61880000
11	111440000	111720000
11	114150000	114350000
11	122480000	122720000
11	88290000	88610000
11	25970000	26300000
11	61240000	61520000
11	32060000	32190000
11	2550000	2910000
11	93620000	93900000
11	8690000	8980000
11	77920000	78280000
11	5490000	5830000
11	86680000	87010000
11	57100000	57420000
11	118010000	118440000
11	94340000	94660000
11	86150000	86530000
11	110060000	110300000
11	34580000	34920000
11	34170000	34510000
11	117280000	117660000
11	33380000	33710000
11	77390000	77760000
11	102570000	102920000
11	129790000	130020000
11	62660000	62800000
11	13490000	13760000
11	19960000	20140000
11	45370000	45810000
11	130300000	130740000
11	121160000	121470000
11	118540000	118850000
11	129280000	129610000
11	10810000	11040000
11	44940000	45120000
11	12080000	12300000
11	13220000	13380000
11	36300000	36520000
11	120190000	120360000
11	33860000	34000000
11	121510000	121960000
11	113870000	114130000
11	82410000	82590000
11	6790000	7080000
11	64540000	64860000
11	125780000	126070000
11	7530000	7710000
11	6390000	6720000
11	63760000	63920000
11	540000	800000
11	15320000	15620000
11	17750000	18000000
11	68380000	68730000
11	95780000	96130000
11	73950000	74300000
11	76890000	77310000
11	13980000	14260000
11	108260000	108530000
11	64140000	64500000
11	16960000	17090000
11	78340000	78680000
11	44640000	44930000
11	27350000	27510000
11	65430000	65610000
11	108590000	108910000
11	19580000	19760000
11	85350000	85550000
11	90380000	90640000
11	125020000	125290000
11	123150000	123370000
11	126160000	126310000
11	65120000	65280000
11	1710000	1870000
11	103190000	103490000
11	117680000	117930000
11	124500000	124700000
11	43890000	44070000
11	43650000	43890000
11	82610000	82920000
11	12380000	12600000
11	44290000	44550000
11	124260000	124460000
11	116740000	116970000
11	17390000	17550000
11	74160000	74290000
11	12970000	13200000
11	47190000	47380000
11	118950000	119210000
11	63950000	64120000
11	62150000	62320000
11	70310000	70620000
11	20170000	20360000
11	34940000	35210000
11	19330000	19560000
11	123650000	123910000
11	18860000	19070000
11	61920000	62140000
11	45130000	45350000
11	76430000	76750000
11	16800000	16950000
11	74720000	74960000
11	74620000	74960000
11	128960000	129200000
11	111130000	111310000
11	41680000	41920000
11	86160000	86310000
11	104810000	105160000
11	130070000	130290000
11	75120000	75250000
11	117690000	117810000
11	10410000	10760000
11	33170000	33360000
11	32960000	33120000
11	120000000	120180000
11	46880000	47160000
11	35240000	35420000
11	9170000	9480000
11	85740000	85940000
11	109810000	110030000
11	113170000	113400000
11	27180000	27330000
11	34380000	34510000
11	86320000	86530000
11	125560000	125740000
11	56860000	57030000
11	75870000	76040000
11	105760000	105940000
11	121310000	121460000
11	112160000	112430000
11	67800000	67970000
11	12680000	12920000
11	88030000	88280000
11	70050000	70250000
11	72160000	72400000
11	128350000	128500000
11	3680000	3830000
11	11810000	11930000
11	35630000	35830000
11	19080000	19270000
11	6540000	6730000
11	22380000	22570000
11	72570000	72840000
11	9280000	9460000
11	34190000	34370000
11	66450000	66600000
11	101880000	102140000
11	66840000	67000000
11	29700000	29910000
11	106170000	106450000
11	118040000	118230000
11	15100000	15250000
11	73120000	73380000
11	75600000	75860000
11	59580000	59700000
11	26540000	26680000
11	73950000	74150000
11	19780000	19920000
11	67990000	68220000
11	112980000	113160000
11	76430000	76630000
11	128030000	128150000
11	58050000	58270000
11	6390000	6530000
11	111740000	111930000
11	118240000	118430000
11	37450000	37620000
11	63530000	63720000
11	66610000	66800000
11	127890000	128020000
11	65820000	66020000
11	46400000	46560000
11	63230000	63390000
11	17590000	17740000
11	15650000	15830000
11	104220000	104400000
11	73660000	73920000
11	124830000	125010000
11	9000000	9160000
11	123940000	124080000
11	76240000	76400000
11	117100000	117240000
11	73420000	73640000
11	28720000	28970000
11	71960000	72140000
11	77930000	78110000
11	9800000	10000000
12	128210000	130490000
12	59620000	62630000
12	82780000	85240000
12	19890000	21420000
12	23320000	24940000
12	63480000	64160000
12	17060000	18170000
12	54880000	56060000
12	131370000	132090000
12	89930000	91330000
12	44350000	45330000
12	118870000	120050000
12	13410000	14320000
12	10920000	11650000
12	34230000	34850000
12	41630000	42420000
12	115080000	116210000
12	103270000	103940000
12	99450000	100160000
12	82030000	82730000
12	77420000	78080000
12	60260000	60910000
12	126560000	127240000
12	117640000	118280000
12	67730000	68380000
12	51800000	52240000
12	106910000	107320000
12	54410000	54590000
12	130510000	130840000
12	56510000	56880000
12	530000	670000
12	113890000	114250000
12	23010000	23290000
12	31000000	31140000
12	58360000	58670000
12	109540000	109840000
12	32610000	32820000
12	13150000	13390000
12	107500000	108020000
12	95440000	95930000
12	104560000	104740000
12	93860000	94500000
12	11700000	12040000
12	10500000	10660000
12	104770000	105270000
12	56150000	56450000
12	64900000	65150000
12	109030000	109210000
12	7350000	7790000
12	95960000	96240000
12	58190000	58330000
12	27060000	27470000
12	48650000	49020000
12	30830000	30960000
12	85930000	86300000
12	52390000	52520000
12	27670000	27820000
12	123110000	123260000
12	127930000	128160000
12	1730000	1900000
12	123290000	123450000
12	14360000	14620000
12	7410000	7690000
12	22300000	22560000
12	31550000	31790000
12	12870000	13080000
12	112950000	113370000
12	78560000	78920000
12	64220000	64650000
12	124840000	125250000
12	49670000	49970000
12	123740000	124110000
12	50880000	51080000
12	3230000	3390000
12	11700000	12180000
12	127510000	127840000
12	22640000	22820000
12	19010000	19350000
12	132310000	132510000
12	118610000	118810000
12	98430000	98780000
12	47490000	47800000
12	21850000	22170000
12	29690000	29990000
12	101800000	102140000
12	96960000	97370000
12	42500000	42750000
12	52530000	52740000
12	48100000	48240000
12	96660000	96910000
12	46750000	47060000
12	59250000	59490000
12	54610000	54780000
12	39520000	39680000
12	70980000	71110000
12	78110000	78330000
12	88530000	88830000
12	85460000	85800000
12	78990000	79410000
12	3400000	3920000
12	93380000	93800000
12	87720000	87950000
12	99090000	99400000
12	25730000	26190000
12	6150000	6400000
12	9210000	9430000
12	85250000	85450000
12	79790000	79930000
12	8790000	9040000
12	41000000	41310000
12	25130000	25310000
12	32510000	32860000
12	109860000	110230000
12	14930000	15150000
12	53910000	54080000
12	80800000	81020000
12	12510000	12860000
12	9750000	9890000
12	86990000	87240000
12	68720000	69070000
12	97390000	97710000
12	32910000	33090000
12	69750000	69990000
12	21630000	21820000
12	89000000	89390000
12	117430000	117580000
12	27860000	28080000
12	45550000	45800000
12	12220000	12480000
12	91350000	91740000
12	65280000	65500000
12	31810000	32140000
12	94520000	94920000
12	105540000	105790000
12	89420000	89740000
12	25570000	25700000
12	53500000	53700000
12	3980000	4410000
12	93880000	94140000
12	54150000	54350000
12	53710000	53890000
12	46460000	46720000
12	15720000	16030000
12	113620000	113860000
12	6680000	6960000
12	118290000	118500000
12	57640000	57850000
12	110880000	111050000
12	25360000	25540000
12	56880000	57020000
12	62990000	63190000
12	47080000	47400000
12	120750000	120890000
12	58730000	58930000
12	72000000	72150000
12	75910000	76430000
12	57910000	58140000
12	64230000	64410000
12	89410000	89910000
12	108640000	108900000
12	106140000	106540000
12	72370000	72620000
12	46750000	46940000
12	120740000	120990000
12	57150000	57380000
12	78360000	78530000
12	5260000	5570000
12	116420000	116690000
12	111330000	111750000
12	50480000	50810000
12	16590000	16830000
12	77000000	77190000
12	67370000	67650000
12	96440000	96610000
12	15430000	15670000
12	32210000	32470000
12	117150000	117400000
12	80260000	80570000
12	18720000	18960000
12	106600000	106760000
12	10730000	10900000
12	69250000	69500000
12	76470000	76740000
12	71120000	71240000
12	44140000	44280000
12	26240000	26560000
12	93170000	93370000
12	39710000	39910000
12	110510000	110840000
12	76240000	76420000
12	124240000	124480000
12	28110000	28340000
12	29220000	29420000
12	132990000	133180000
12	16300000	16520000
12	107840000	108000000
12	116710000	117050000
12	95470000	95670000
12	107520000	107800000
12	94930000	95160000
12	57400000	57600000
12	113420000	113610000
12	4200000	4380000
12	112630000	112830000
12	65700000	65920000
12	91360000	91520000
12	97820000	98090000
12	123470000	123680000
12	69080000	69240000
12	50240000	50470000
12	1910000	2040000
12	49450000	49650000
12	50010000	50150000
12	95730000	95930000
12	63220000	63450000
12	52980000	53260000
12	4440000	4640000
12	75720000	75890000
12	65950000	66230000
12	94520000	94680000
12	19480000	19690000
12	121930000	122110000
12	101320000	101530000
12	51440000	51760000
12	39310000	39490000
12	105810000	106090000
12	124520000	124800000
12	120370000	120530000
12	1220000	1700000
12	26590000	26850000
12	52770000	52970000
12	121450000	121670000
12	10150000	10300000
12	125050000	125250000
12	68410000	68580000
12	107340000	107480000
12	100740000	100940000
12	7990000	8180000
12	51200000	51420000
12	79950000	80130000
12	56710000	56860000
12	111080000	111310000
12	70760000	70960000
12	104340000	104520000
12	121730000	121890000
12	111760000	111900000
12	2910000	3150000
12	98930000	99080000
12	30450000	30660000
12	96260000	96420000
12	122840000	122980000
12	680000	860000
12	121180000	121410000
12	6490000	6650000
12	3410000	3650000
12	49210000	49390000
12	79210000	79390000
12	3740000	3920000
12	69540000	69720000
12	7810000	7970000
12	45930000	46120000
12	121020000	121160000
12	9930000	10100000
12	111920000	112120000
12	92390000	92510000
12	75510000	75680000
12	2160000	2360000
12	1050000	1210000
12	26860000	27020000
12	43250000	43430000
13	111980000	113110000
13	22190000	23410000
13	74320000	75870000
13	114420000	115100000
13	60250000	61000000
13	96650000	97620000
13	47380000	48350000
13	80200000	80930000
13	85460000	86390000
13	40620000	41270000
13	24600000	24800000
13	97740000	98010000
13	45190000	45510000
13	32440000	32860000
13	87560000	87920000
13	30070000	30300000
13	113270000	113530000
13	27950000	28350000
13	32020000	32360000
13	102780000	103160000
13	28890000	29230000
13	62680000	62930000
13	70110000	70420000
13	47080000	47310000
13	103220000	103500000
13	24100000	24460000
13	38650000	39070000
13	41630000	41900000
13	110850000	111090000
13	49360000	49770000
13	21070000	21490000
13	45600000	45870000
13	95060000	95280000
13	51970000	52370000
13	44690000	45010000
13	78350000	78690000
13	75910000	76160000
13	27540000	27920000
13	60020000	60240000
13	25310000	25560000
13	37650000	38170000
13	98760000	99060000
13	45890000	46060000
13	99090000	99320000
13	70900000	71140000
13	110440000	110770000
13	98490000	98670000
13	79570000	79830000
13	73380000	73620000
13	21850000	22050000
13	76240000	76430000
13	49860000	50180000
13	109600000	109760000
13	106720000	107180000
13	95840000	96060000
13	28400000	28570000
13	41950000	42230000
13	50240000	50510000
13	51690000	51890000
13	26740000	27000000
13	91520000	91670000
13	28620000	28860000
13	26380000	26640000
13	45050000	45540000
13	40010000	40190000
13	42890000	43160000
13	103530000	103810000
13	40320000	40510000
13	31790000	31990000
13	21510000	21740000
13	27280000	27500000
13	65090000	65370000
13	30340000	30690000
13	20290000	20470000
13	52150000	52340000
13	31210000	31400000
13	46120000	46320000
13	71850000	72060000
13	27070000	27270000
13	33300000	33580000
13	100280000	100540000
13	34490000	34650000
13	20750000	21060000
13	49160000	49340000
13	29240000	29370000
13	36540000	36840000
13	34120000	34310000
13	107860000	108020000
13	42470000	42680000
13	43240000	43430000
13	93370000	93530000
13	96270000	96490000
13	37410000	37560000
13	102420000	102580000
13	102160000	102410000
13	41500000	41630000
13	95610000	95810000
13	61030000	61180000
13	113900000	114050000
13	51150000	51370000
13	21070000	21260000
13	48680000	48840000
13	36380000	36530000
13	43520000	43660000
13	111550000	111700000
13	99500000	99680000
13	111750000	111920000
13	100700000	100890000
13	31460000	31600000
14	106060000	107280000
14	82330000	83270000
14	86580000	87370000
14	78310000	79300000
14	38370000	39380000
14	44390000	45310000
14	97030000	97380000
14	80680000	81320000
14	54010000	54820000
14	89710000	90260000
14	103450000	103940000
14	56980000	57660000
14	76490000	77130000
14	57120000	57650000
14	25250000	25610000
14	99940000	100400000
14	36490000	37000000
14	62630000	63370000
14	87530000	88090000
14	105830000	105990000
14	104660000	105100000
14	70040000	70230000
14	102420000	102830000
14	77400000	77560000
14	53870000	54820000
14	56160000	56940000
14	55660000	56150000
14	81760000	81940000
14	61740000	61910000
14	64950000	65440000
14	23020000	23380000
14	55030000	55150000
14	99990000	100130000
14	29460000	30000000
14	36340000	37000000
14	92600000	93160000
14	37700000	38350000
14	59020000	59480000
14	61060000	61720000
14	21450000	21600000
14	61920000	62230000
14	29210000	30000000
14	33040000	33890000
14	20780000	21100000
14	31340000	31880000
14	21670000	21930000
14	37090000	37660000
14	35760000	35880000
14	102830000	103400000
14	55020000	55260000
14	70280000	70510000
14	24070000	24400000
14	24930000	25160000
14	28700000	29080000
14	71050000	71480000
14	99260000	99730000
14	34300000	34780000
14	72350000	72890000
14	96560000	96740000
14	69320000	69570000
14	96020000	96450000
14	21160000	21440000
14	45350000	45740000
14	71560000	72210000
14	88410000	88850000
14	67610000	67810000
14	104200000	104500000
14	60790000	61040000
14	50320000	50570000
14	90430000	90710000
14	93670000	94080000
14	50080000	50300000
14	73610000	73940000
14	67850000	68250000
14	75350000	75570000
14	102970000	103390000
14	85620000	86000000
14	64250000	64790000
14	28810000	29070000
14	30030000	30470000
14	62320000	62600000
14	93390000	93630000
14	59590000	59930000
14	35590000	35880000
14	52750000	52940000
14	100180000	100370000
14	39580000	39900000
14	95160000	95560000
14	88190000	88390000
14	92090000	92400000
14	72960000	73390000
14	34790000	35000000
14	27200000	27470000
14	68710000	69290000
14	54470000	54810000
14	35910000	36280000
14	83520000	83740000
14	74160000	74350000
14	55900000	56120000
14	89080000	89480000
14	73950000	74110000
14	59990000	60390000
14	51400000	51700000
14	55490000	55640000
14	69620000	69950000
14	51730000	52170000
14	61160000	61430000
14	101740000	102100000
14	37410000	37600000
14	79430000	79700000
14	102150000	102410000
14	60510000	60690000
14	100430000	100670000
14	45360000	45590000
14	103540000	103780000
14	37710000	38060000
14	91770000	91920000
14	67880000	68040000
14	94110000	94380000
14	90760000	91200000
14	31630000	31830000
14	68390000	68700000
14	96760000	96960000
14	75770000	76120000
14	81420000	81650000
14	68050000	68170000
14	35030000	35490000
14	99750000	99910000
14	65240000	65370000
14	97040000	97200000
14	53260000	53480000
14	51020000	51240000
14	95590000	95880000
14	41830000	42070000
14	61480000	61720000
14	38150000	38360000
14	104020000	104170000
14	63830000	64040000
14	23390000	23550000
14	32720000	33020000
14	34310000	34570000
14	77580000	77780000
14	71060000	71280000
14	87800000	88080000
14	75010000	75290000
14	58660000	58920000
14	76510000	76860000
14	52250000	52450000
14	71290000	71470000
14	75780000	75940000
14	54640000	54810000
14	74790000	74950000
14	76150000	76450000
14	70550000	70770000
14	72980000	73170000
14	76890000	77120000
14	55660000	55870000
14	65630000	65870000
14	100850000	101110000
14	50780000	50990000
14	64480000	64780000
14	31400000	31580000
14	85870000	85990000
14	77150000	77310000
14	91350000	91630000
14	22850000	22990000
14	57670000	57860000
14	33920000	34260000
14	71600000	71770000
14	101130000	101310000
14	49910000	50050000
14	65880000	66180000
14	73190000	73370000
14	63600000	63760000
14	93820000	94080000
14	103160000	103400000
14	101340000	101700000
14	58150000	58340000
14	73760000	73930000
14	32550000	32720000
14	56170000	56390000
14	52460000	52610000
14	73420000	73600000
14	50590000	50750000
14	46090000	46260000
14	36350000	36520000
14	53110000	53250000
14	64800000	64960000
14	42570000	42690000
14	92450000	92610000
14	102980000	103140000
14	70820000	71020000
14	54490000	54630000
14	92630000	92830000
14	53560000	53760000
14	90860000	91000000
14	94650000	94880000
14	64260000	64460000
14	74550000	74760000
14	59100000	59300000
14	65880000	66080000
14	32340000	32520000
14	101370000	101540000
14	103800000	103960000
14	64090000	64240000
14	74360000	74510000
15	53050000	55450000
15	93600000	94660000
15	96900000	97800000
15	37470000	38180000
15	88210000	88990000
15	81710000	82550000
15	50750000	51210000
15	59800000	59960000
15	49780000	50320000
15	32920000	33450000
15	22860000	23010000
15	90220000	90660000
15	33540000	34000000
15	99930000	100240000
15	97840000	98220000
15	60620000	60810000
15	72580000	72910000
15	99790000	100290000
15	64450000	64970000
15	65760000	66180000
15	89580000	89720000
15	101830000	102180000
15	73080000	73410000
15	85830000	86040000
15	66610000	66790000
15	41030000	41180000
15	79180000	79500000
15	100470000	100870000
15	41710000	42210000
15	74680000	74900000
15	32920000	33280000
15	45990000	46580000
15	85490000	85710000
15	86260000	86390000
15	34510000	34650000
15	93320000	93440000
15	89420000	89570000
15	25540000	25710000
15	45710000	45920000
15	80710000	81280000
15	83910000	84090000
15	75660000	75970000
15	101550000	101810000
15	60860000	61360000
15	74910000	75250000
15	77870000	78160000
15	78220000	78550000
15	87580000	88150000
15	90280000	90420000
15	91590000	91820000
15	67220000	67490000
15	79630000	80100000
15	34030000	34300000
15	55800000	56130000
15	58010000	58470000
15	44160000	44530000
15	58500000	59170000
15	77390000	77830000
15	101160000	101420000
15	69320000	69710000
15	98430000	98730000
15	31490000	31780000
15	40320000	40480000
15	98840000	98960000
15	63910000	64380000
15	76650000	77180000
15	41730000	42100000
15	29960000	30370000
15	52240000	52490000
15	52540000	53030000
15	42990000	43240000
15	99630000	99780000
15	66860000	67170000
15	68840000	68980000
15	48630000	49060000
15	38280000	38670000
15	83210000	83690000
15	94700000	94870000
15	78250000	78390000
15	100930000	101130000
15	41190000	41620000
15	74910000	75060000
15	39000000	39390000
15	31170000	31430000
15	49130000	49440000
15	63570000	63710000
15	71260000	71730000
15	44870000	45080000
15	49150000	49270000
15	73840000	73990000
15	67740000	68120000
15	81310000	81700000
15	91840000	92200000
15	51940000	52060000
15	39460000	39870000
15	38720000	38980000
15	86400000	86730000
15	57620000	57830000
15	59980000	60610000
15	55470000	55730000
15	50950000	51200000
15	95200000	95540000
15	64450000	64670000
15	81560000	81700000
15	70380000	70810000
15	37180000	37430000
15	90650000	90810000
15	89870000	90130000
15	56540000	56740000
15	78860000	79040000
15	59450000	59790000
15	89000000	89160000
15	90850000	91020000
15	69560000	69700000
15	60870000	61200000
15	64200000	64360000
15	78570000	78720000
15	65310000	65590000
15	92380000	92610000
15	39460000	39740000
15	39880000	40060000
15	48640000	48950000
15	48390000	48580000
15	51440000	51690000
15	66200000	66570000
15	76470000	76650000
15	52850000	53020000
15	99470000	99610000
15	35570000	35740000
15	58160000	58380000
15	71390000	71730000
15	78400000	78550000
15	45450000	45700000
15	59990000	60190000
15	61950000	62120000
15	99800000	99920000
15	74010000	74200000
15	83500000	83670000
15	60280000	60540000
15	44550000	44820000
15	85180000	85320000
15	68140000	68480000
15	79180000	79300000
15	48010000	48240000
15	81340000	81550000
15	93060000	93260000
15	50440000	50610000
15	59230000	59410000
15	69010000	69210000
15	99190000	99440000
15	90440000	90630000
15	81070000	81260000
15	100470000	100690000
15	40070000	40290000
15	56180000	56390000
15	42260000	42440000
15	70950000	71180000
15	65010000	65280000
15	89200000	89390000
15	79320000	79490000
15	69760000	70300000
15	62150000	62600000
15	52070000	52220000
15	73590000	73810000
15	98980000	99180000
15	71740000	72030000
15	72120000	72450000
15	65910000	66160000
15	91260000	91450000
15	63730000	63890000
15	76100000	76440000
15	42470000	42750000
15	63060000	63380000
15	62650000	63020000
15	80330000	80470000
15	69340000	69550000
15	80850000	81060000
15	33300000	33460000
15	64700000	64960000
15	68340000	68460000
15	55940000	56120000
15	62150000	62340000
15	83700000	83890000
15	35820000	36030000
15	86770000	87000000
15	95570000	95790000
15	40570000	40730000
15	55790000	55930000
15	42760000	42950000
15	62810000	63000000
15	41850000	42050000
15	57840000	58000000
15	59530000	59660000
15	36600000	36780000
15	57210000	57420000
15	44360000	44510000
15	85350000	85470000
15	63400000	63560000
15	80530000	80680000
16	25290000	27140000
16	87980000	88630000
16	16860000	18160000
16	9350000	10260000
16	34180000	35270000
16	78420000	79310000
16	82870000	83790000
16	52080000	52980000
16	48700000	49380000
16	48280000	48660000
16	27200000	27380000
16	15950000	16160000
16	49470000	49830000
16	2780000	2940000
16	56000000	56350000
16	14370000	14620000
16	2320000	2490000
16	48390000	48660000
16	23790000	24050000
16	30470000	30650000
16	58540000	58760000
16	89740000	90150000
16	86590000	87090000
16	20810000	21110000
16	19390000	19530000
16	85300000	85670000
16	87420000	87690000
16	78140000	78290000
16	11490000	11810000
16	10340000	10600000
16	12030000	12170000
16	1880000	2000000
16	11110000	11370000
16	88880000	89270000
16	47720000	48100000
16	83960000	84100000
16	81910000	82260000
16	10840000	11030000
16	66960000	67220000
16	55740000	55890000
16	86080000	86560000
16	75230000	75430000
16	19570000	19900000
16	76690000	77210000
16	74980000	75170000
16	70360000	70550000
16	30790000	30950000
16	81400000	81760000
16	69170000	69340000
16	28100000	28240000
16	68560000	68860000
16	4750000	5010000
16	72150000	72510000
16	77700000	78010000
16	3230000	3540000
16	81040000	81380000
16	89350000	89600000
16	10610000	10820000
16	74000000	74310000
16	85840000	86050000
16	77250000	77630000
16	57330000	57460000
16	24530000	24810000
16	12620000	12920000
16	80000000	80400000
16	14010000	14330000
16	66380000	66630000
16	72520000	72800000
16	75820000	76270000
16	89630000	89750000
16	68920000	69150000
16	23180000	23450000
16	55490000	55730000
16	73590000	73940000
16	71690000	72040000
16	51820000	52020000
16	74720000	74910000
16	58360000	58520000
16	86340000	86550000
16	71420000	71650000
16	69410000	69710000
16	46690000	46860000
16	57570000	57760000
16	84540000	84770000
16	72850000	73230000
16	31210000	31450000
16	85690000	85830000
16	84780000	84990000
16	30960000	31190000
16	67280000	67500000
16	53070000	53280000
16	69800000	69970000
16	56540000	56760000
16	57780000	57920000
16	430000	570000
16	67520000	67690000
16	4540000	4690000
16	89770000	89970000
16	53330000	53540000
16	87100000	87330000
16	85460000	85640000
16	29870000	30030000
16	68110000	68260000
16	3750000	3940000
16	68390000	68550000
16	19200000	19380000
16	75460000	75650000
16	79600000	79840000
16	84300000	84510000
16	54830000	54990000
16	53730000	53940000
16	50400000	50690000
16	68560000	68720000
16	85140000	85290000
16	53980000	54200000
16	82620000	82790000
16	76690000	76870000
16	56880000	57100000
16	67710000	67830000
17	10660000	11850000
17	12080000	12910000
17	72210000	72850000
17	52250000	52960000
17	51390000	52050000
17	77170000	77350000
17	21210000	21410000
17	53980000	54540000
17	71420000	71980000
17	71570000	71990000
17	70550000	70710000
17	39690000	39830000
17	15120000	15410000
17	77750000	77940000
17	58780000	59470000
17	34960000	35420000
17	43710000	43900000
17	59700000	60180000
17	33910000	34170000
17	35990000	36160000
17	78390000	78940000
17	44120000	44260000
17	2710000	2930000
17	32110000	32470000
17	55200000	55730000
17	56370000	56570000
17	33280000	33450000
17	46990000	47110000
17	33530000	33880000
17	32500000	32690000
17	66760000	67260000
17	5520000	5970000
17	76810000	76990000
17	26210000	26650000
17	73900000	74340000
17	680000	890000
17	71420000	72190000
17	6940000	7090000
17	47920000	48070000
17	62910000	63190000
17	56590000	57100000
17	75070000	75240000
17	38570000	38720000
17	29230000	29550000
17	29720000	29860000
17	6550000	6910000
17	3620000	4030000
17	31090000	31260000
17	45260000	45450000
17	57300000	57630000
17	61490000	61810000
17	59490000	59670000
17	78960000	79080000
17	27280000	27440000
17	47640000	47790000
17	42270000	42420000
17	71190000	71380000
17	8300000	8680000
17	42450000	42790000
17	53440000	53590000
17	39050000	39470000
17	10260000	10510000
17	7620000	7950000
17	42830000	43200000
17	6350000	6540000
17	70720000	71180000
17	17230000	17540000
17	27930000	28410000
17	11890000	12050000
17	27050000	27270000
17	49380000	49820000
17	61960000	62080000
17	47490000	47630000
17	66240000	66450000
17	37690000	38130000
17	38750000	38940000
17	15950000	16250000
17	46210000	46690000
17	74740000	75060000
17	30780000	31090000
17	75510000	76030000
17	6190000	6330000
17	29870000	30170000
17	1950000	2190000
17	75300000	75500000
17	2320000	2600000
17	9870000	10140000
17	930000	1100000
17	76250000	76420000
17	79220000	79470000
17	35150000	35400000
17	19410000	19680000
17	49060000	49230000
17	73260000	73580000
17	48230000	48410000
17	67550000	68130000
17	1780000	1940000
17	41170000	41390000
17	25520000	25670000
17	46720000	46950000
17	53060000	53390000
17	41580000	41850000
17	17770000	17940000
17	64190000	64670000
17	68630000	69050000
17	76470000	76730000
17	37090000	37330000
17	4600000	4800000
17	40460000	40680000
17	80740000	80880000
17	7250000	7470000
17	56780000	57080000
17	19880000	20010000
17	7800000	7950000
17	68150000	68610000
17	42580000	42770000
17	42970000	43200000
17	31340000	31650000
17	80290000	80540000
17	64700000	65050000
17	9470000	9620000
17	48840000	49050000
17	27930000	28110000
17	9190000	9450000
17	54650000	54820000
17	28120000	28410000
17	79990000	80150000
17	74510000	74710000
17	46510000	46670000
17	73620000	73750000
17	80560000	80720000
17	65360000	65700000
17	78030000	78360000
17	61490000	61690000
17	4090000	4310000
17	48560000	48790000
17	9640000	9820000
17	53600000	53880000
17	70120000	70530000
17	47640000	47890000
17	54880000	55040000
17	75760000	76000000
17	76070000	76240000
17	25730000	25930000
17	61130000	61470000
17	63230000	63550000
17	60770000	61050000
17	17250000	17390000
17	58300000	58500000
17	64710000	64890000
17	27660000	27880000
17	14850000	15070000
17	30800000	30950000
17	38140000	38320000
17	66760000	66960000
17	67280000	67510000
17	20920000	21150000
17	3750000	3980000
17	78660000	78860000
17	1570000	1750000
17	69110000	69460000
17	27450000	27610000
17	28130000	28270000
17	58530000	58730000
17	58780000	59050000
17	75520000	75710000
17	1250000	1420000
17	67600000	67890000
17	70350000	70530000
17	40110000	40290000
17	26220000	26510000
17	73020000	73210000
17	6560000	6730000
17	74290000	74430000
17	28430000	28600000
17	65190000	65350000
17	36900000	37070000
17	66600000	66750000
17	37910000	38100000
17	45900000	46090000
17	72010000	72180000
17	74100000	74280000
17	29550000	29690000
17	4810000	4960000
17	69230000	69460000
17	56590000	56770000
17	69510000	69740000
17	37410000	37550000
17	14550000	14820000
17	71650000	71870000
17	40980000	41140000
17	57110000	57280000
17	59940000	60140000
17	65720000	65940000
17	59700000	59920000
17	48430000	48550000
17	47120000	47300000
17	46250000	46410000
18	4090000	7140000
18	75160000	76720000
18	68240000	70290000
18	61680000	64130000
18	50100000	51370000
18	66490000	67780000
18	11650000	12270000
18	39680000	41140000
18	52880000	54270000
18	77120000	78010000
18	38010000	38980000
18	10800000	11560000
18	73280000	74020000
18	54410000	55220000
18	13820000	14060000
18	61170000	61510000
18	52370000	52650000
18	70410000	70800000
18	51680000	51890000
18	32430000	32770000
18	76820000	77010000
18	43250000	43450000
18	9970000	10520000
18	700000	850000
18	21080000	21450000
18	61000000	61150000
18	39330000	39510000
18	60360000	60640000
18	45550000	45970000
18	67910000	68120000
18	47980000	48310000
18	12400000	12670000
18	74080000	74420000
18	44580000	44740000
18	56470000	56740000
18	59990000	60250000
18	29850000	30050000
18	13150000	13530000
18	34890000	35140000
18	3700000	4020000
18	9550000	9950000
18	74700000	74930000
18	45990000	46190000
18	24910000	25170000
18	56880000	57090000
18	23950000	24230000
18	51420000	51640000
18	3260000	3680000
18	20610000	21000000
18	45290000	45540000
18	28990000	29120000
18	19750000	20150000
18	33590000	33860000
18	21510000	21710000
18	56030000	56160000
18	60670000	60980000
18	28540000	28980000
18	32800000	32950000
18	8630000	9000000
18	12700000	12940000
18	47020000	47390000
18	20370000	20580000
18	32960000	33270000
18	55280000	55530000
18	29130000	29400000
18	47740000	47900000
18	43490000	43670000
18	71850000	72010000
18	22110000	22330000
18	3270000	3440000
18	43690000	43850000
18	64880000	65120000
18	270000	610000
18	46290000	46540000
18	32180000	32380000
18	28540000	28880000
18	47560000	47740000
18	56180000	56420000
18	48330000	48590000
18	49580000	49810000
18	33330000	33540000
18	18780000	19060000
18	2910000	3240000
18	57500000	57650000
18	37450000	37680000
18	74500000	74680000
18	9560000	9720000
18	55850000	56000000
18	71170000	71480000
18	55540000	55810000
18	9730000	9950000
18	12520000	12650000
18	19160000	19400000
18	9190000	9530000
18	57290000	57480000
18	21730000	21890000
18	19530000	19730000
18	2260000	2550000
18	20150000	20330000
18	2570000	2790000
18	45760000	45960000
18	46770000	46970000
18	23980000	24130000
18	7790000	8010000
18	9330000	9520000
18	12960000	13120000
18	57110000	57270000
18	42820000	42980000
18	58470000	58660000
18	73040000	73190000
1	242160000	243110000
1	144830000	145740000
1	247550000	248580000
1	101940000	103500000
1	190490000	192420000
1	49010000	50810000
1	4000000	5910000
1	68970000	70260000
1	104310000	105120000
1	118510000	119980000
1	106540000	107700000
1	34090000	35200000
1	2690000	3340000
1	60610000	61270000
1	60440000	61290000
1	213400000	214350000
1	163400000	164360000
1	95740000	96490000
1	245280000	246160000
1	158170000	159050000
1	79960000	80630000
1	237090000	237720000
1	230750000	231380000
1	63300000	64000000
1	36970000	37900000
1	210590000	211310000
1	184030000	184660000
1	38480000	39300000
1	198700000	199510000
1	168570000	169160000
1	246650000	246980000
1	229780000	230440000
1	175340000	175760000
1	89550000	89860000
1	165950000	166430000
1	90570000	90980000
1	110680000	111040000
1	216900000	217500000
1	36550000	36920000
1	58970000	59130000
1	17430000	17730000
1	186350000	186970000
1	220990000	221600000
1	168560000	169330000
1	21540000	21690000
1	86830000	87180000
1	169390000	169820000
1	44680000	45130000
1	222890000	223260000
1	108320000	108680000
1	159300000	159730000
1	221620000	222190000
1	225140000	225550000
1	12340000	12700000
1	65700000	66100000
1	146950000	147390000
1	44520000	45150000
1	2340000	2460000
1	68000000	68220000
1	180910000	181140000
1	240350000	240850000
1	185690000	186250000
1	159240000	159740000
1	97600000	98020000
1	220440000	220950000
1	233490000	233950000
1	235390000	235600000
1	211450000	211830000
1	225640000	226170000
1	46860000	47180000
1	218480000	219260000
1	14920000	15400000
1	161160000	161400000
1	78660000	79060000
1	29080000	29540000
1	228850000	229070000
1	212230000	212550000
1	228300000	228730000
1	177400000	177750000
1	94660000	94800000
1	83450000	83600000
1	218070000	218370000
1	88620000	89050000
1	45190000	45470000
1	182410000	182790000
1	32860000	33320000
1	51820000	52260000
1	210010000	210150000
1	113670000	114230000
1	149840000	150190000
[truncated: 3,229 more rows]

## Sheet: S024_R1
Supplementary Table S4: TADs called by Arrowhead from Hi-C libraries
#chr	x1	x2
9	89070000	89930000
9	92880000	93630000
9	32360000	32980000
9	126170000	126810000
9	117140000	117800000
9	107530000	108200000
9	130690000	130830000
9	136670000	136830000
9	74230000	74380000
10	28930000	29610000
10	30970000	32090000
10	76010000	76870000
10	16860000	17630000
10	3220000	4820000
10	112530000	112650000
10	71990000	72130000
10	11160000	11320000
10	105480000	105620000
10	32520000	32660000
10	103640000	103760000
11	35550000	36540000
11	85310000	86030000
11	94870000	95490000
11	35590000	36280000
11	70300000	71290000
11	128040000	128720000
11	68860000	69470000
11	113900000	114050000
11	65120000	65260000
11	62170000	62310000
11	33180000	33340000
11	35010000	35200000
11	19960000	20110000
11	118050000	118170000
11	122980000	123130000
11	65460000	65610000
11	65830000	66030000
11	66460000	66600000
11	66290000	66440000
11	66820000	67000000
12	115090000	116210000
12	103300000	103940000
12	70260000	70990000
12	104580000	105280000
12	31800000	32480000
12	67720000	68370000
12	105800000	106540000
12	116430000	117090000
12	109010000	109180000
12	52760000	52920000
12	49760000	49910000
12	121750000	121910000
12	125050000	125240000
13	109590000	110780000
13	108850000	109560000
13	27930000	28560000
13	73350000	74290000
13	50550000	51490000
13	40630000	41250000
13	31230000	31370000
13	99920000	100080000
13	91770000	91900000
14	65620000	66440000
14	56160000	56880000
14	105190000	105990000
14	65660000	66300000
14	68300000	69300000
14	89620000	90390000
14	61080000	61720000
14	71590000	72210000
14	55730000	55880000
14	75780000	75940000
15	85090000	85710000
15	59980000	60610000
15	31150000	31800000
15	58500000	59160000
15	69760000	70820000
15	75060000	75240000
15	63750000	63890000
16	11030000	11940000
16	50040000	50860000
16	16950000	17580000
16	14000000	14770000
16	8580000	9230000
16	15490000	16290000
16	89750000	89900000
16	27220000	27360000
16	84800000	84980000
16	67030000	67170000
17	71410000	72190000
17	33470000	34100000
17	58780000	59470000
17	5480000	6320000
17	38950000	39820000
17	40070000	40700000
17	70550000	70720000
17	49070000	49220000
17	6950000	7070000
17	76840000	76970000
17	74120000	74270000
17	74510000	74670000
17	1250000	1410000
17	76710000	76830000
18	20370000	21010000
18	46190000	46990000
18	60800000	60950000
1	84360000	85250000
1	2720000	3340000
1	180470000	181150000
1	168560000	169320000
1	89380000	90470000
1	37020000	37900000
1	64070000	64700000
1	38490000	39300000
1	87740000	88440000
1	150310000	150970000
1	154440000	155050000
1	229790000	230450000
1	59160000	60220000
1	146490000	147390000
1	9340000	9510000
1	211680000	211840000
1	184800000	184940000
1	1040000	1230000
1	6570000	6710000
1	32110000	32250000
1	44250000	44400000
1	110730000	110850000
20	46310000	47230000
20	42060000	42730000
20	30410000	30570000
20	320000	450000
20	17680000	17870000
20	60580000	60720000
20	35900000	36020000
20	57450000	57600000
20	48270000	48430000
20	33410000	33580000
19	11860000	12650000
19	50850000	50980000
19	10810000	10950000
19	11380000	11590000
19	13080000	13200000
19	56000000	56120000
19	18550000	18690000
22	20750000	21400000
22	35690000	36530000
22	44350000	45030000
21	30560000	30720000
21	45230000	45390000
21	36260000	36410000
2	217540000	218610000
2	169160000	169770000
2	135720000	136490000
2	96740000	97660000
2	138630000	139580000
2	239950000	240940000
2	230670000	231670000
2	11950000	13150000
2	237250000	237980000
2	98330000	99000000
2	161100000	161850000
2	43050000	43800000
2	27920000	28670000
2	10410000	10570000
2	54750000	54900000
2	219570000	219690000
2	28810000	28950000
2	198050000	198170000
2	68370000	68510000
2	69780000	69940000
3	50650000	51410000
3	44350000	44980000
3	136820000	137660000
3	181410000	182410000
3	124470000	125310000
3	27750000	28370000
3	126380000	127220000
3	168810000	169460000
3	16620000	17270000
3	187450000	188670000
3	135780000	136740000
3	156250000	156860000
3	71920000	72870000
3	185660000	186280000
3	142780000	143400000
3	188960000	189580000
3	171750000	171970000
3	184100000	184260000
3	148830000	148980000
3	45110000	45250000
3	176760000	176900000
4	103320000	104020000
4	153410000	153560000
4	7840000	7980000
5	81620000	82870000
5	142280000	143220000
5	126890000	127530000
5	110860000	111480000
5	60340000	60960000
5	80720000	81530000
5	137910000	138620000
5	73190000	73950000
5	173190000	173340000
5	133740000	133920000
6	151950000	152670000
6	161130000	161800000
6	135820000	136550000
6	142960000	143770000
6	1570000	2670000
6	14190000	15520000
6	44430000	45890000
6	11610000	12290000
6	134460000	135200000
6	105870000	106750000
6	108020000	108160000
6	2810000	2950000
6	4770000	4940000
6	31620000	31790000
7	130550000	131340000
7	19750000	20630000
7	115770000	116490000
7	12660000	13300000
7	111390000	112130000
7	7660000	8270000
7	139870000	140030000
7	92320000	92460000
7	75480000	75640000
7	154990000	155130000
7	6190000	6340000
X	48430000	49080000
X	128700000	129340000
8	58290000	59320000
8	97300000	98560000
8	104730000	105460000
8	65440000	66480000
8	130810000	131700000
8	29190000	29910000
8	49210000	49840000
8	124810000	125450000
8	66750000	66900000
8	41860000	42000000
8	56750000	56900000
8	42020000	42160000
8	90870000	90990000
8	134060000	134210000
8	21890000	22020000

## Sheet: S024_R2
Supplementary Table S4: TADs called by Arrowhead from Hi-C libraries
#chr	x1	x2
14	89640000	90420000
1	59200000	60220000
20	62130000	62880000
6	14620000	15430000
6	6650000	7260000
6	26010000	26660000
7	76800000	77420000
8	48220000	48840000
