# Supplementary material for: Profiling of 3D Genome Organization in Nasopharyngeal Cancer Needle Biopsy Patient Samples by a Modified Hi-C Approach
Source: Front Genet. 2021 Sep 3;12:673530. doi: 10.3389/fgene.2021.673530 (PMC8446523; doi:10.3389/fgene.2021.673530)
Supplement: Supplementary file 9 [file Table_8.XLSX]

## Sheet: S009
Supplementary Table S6: FIREs called by FIREcaller from HiC libraries
chr	start	end
chr1	1030000	1040000
chr1	1120000	1130000
chr1	1400000	1410000
chr1	7330000	7340000
chr1	8130000	8140000
chr1	8150000	8160000
chr1	8180000	8210000
chr1	8230000	8240000
chr1	8580000	8590000
chr1	8610000	8660000
chr1	8680000	8710000
chr1	8720000	8780000
chr1	10150000	10160000
chr1	10330000	10340000
chr1	12440000	12450000
chr1	12460000	12490000
chr1	12500000	12520000
chr1	12530000	12540000
chr1	14040000	14050000
chr1	14480000	14490000
chr1	21300000	21340000
chr1	21350000	21360000
chr1	21370000	21390000
chr1	23370000	23380000
chr1	23420000	23430000
chr1	25150000	25160000
chr1	25930000	25940000
chr1	25950000	25960000
chr1	27010000	27030000
chr1	27040000	27060000
chr1	27110000	27120000
chr1	27740000	27750000
chr1	27780000	27790000
chr1	27810000	27820000
chr1	28730000	28740000
chr1	29340000	29360000
chr1	31030000	31040000
chr1	31440000	31450000
chr1	31460000	31470000
chr1	31480000	31490000
chr1	39720000	39730000
chr1	39890000	39900000
chr1	42670000	42680000
chr1	44230000	44250000
chr1	45540000	45550000
chr1	45610000	45620000
chr1	51000000	51010000
chr1	63110000	63120000
chr1	71380000	71390000
chr1	73740000	73750000
chr1	73970000	73980000
chr1	73990000	74000000
chr1	74610000	74620000
chr1	74800000	74810000
chr1	75490000	75500000
chr1	75840000	75860000
chr1	89210000	89220000
chr1	89560000	89570000
chr1	89580000	89610000
chr1	89630000	89640000
chr1	89650000	89690000
chr1	89720000	89730000
chr1	92160000	92170000
chr1	94660000	94670000
chr1	94690000	94700000
chr1	99380000	99390000
chr1	99700000	99710000
chr1	99760000	99770000
chr1	99800000	99810000
chr1	99830000	99840000
chr1	101620000	101630000
chr1	103190000	103200000
chr1	103270000	103280000
chr1	103350000	103360000
chr1	103380000	103410000
chr1	103480000	103490000
chr1	103610000	103620000
chr1	104890000	104900000
chr1	105200000	105210000
chr1	105560000	105570000
chr1	105590000	105600000
chr1	105850000	105860000
chr1	105880000	105890000
chr1	106500000	106510000
chr1	106750000	106760000
chr1	106820000	106830000
chr1	107270000	107280000
chr1	108470000	108480000
chr1	111360000	111370000
chr1	111800000	111810000
chr1	113840000	113850000
chr1	113870000	113880000
chr1	113990000	114000000
chr1	114040000	114060000
chr1	114130000	114140000
chr1	115520000	115530000
chr1	119020000	119030000
chr1	119120000	119130000
chr1	146600000	146610000
chr1	146620000	146630000
chr1	146660000	146670000
chr1	146680000	146690000
chr1	146710000	146720000
chr1	146830000	146860000
chr1	146930000	146940000
chr1	147100000	147110000
chr1	147200000	147210000
chr1	147260000	147270000
chr1	149090000	149100000
chr1	149120000	149130000
chr1	149930000	149950000
chr1	149960000	149980000
chr1	149990000	150070000
chr1	150620000	150630000
chr1	150660000	150720000
chr1	150730000	150740000
chr1	150770000	150780000
chr1	150800000	150810000
chr1	151570000	151580000
chr1	151590000	151600000
chr1	151630000	151650000
chr1	152200000	152210000
chr1	152300000	152320000
chr1	152340000	152350000
chr1	152960000	152970000
chr1	152980000	152990000
chr1	155360000	155380000
chr1	155430000	155450000
chr1	155460000	155480000
chr1	158340000	158360000
chr1	158800000	158810000
chr1	158820000	158830000
chr1	159420000	159430000
chr1	159490000	159500000
chr1	159620000	159630000
chr1	172150000	172160000
chr1	172220000	172230000
chr1	172240000	172250000
chr1	172280000	172290000
chr1	172940000	172950000
chr1	172970000	172980000
chr1	173010000	173040000
chr1	174810000	174820000
chr1	185220000	185230000
chr1	185440000	185450000
chr1	185470000	185490000
chr1	185930000	185940000
chr1	187640000	187660000
chr1	188120000	188130000
chr1	188410000	188420000
chr1	188470000	188480000
chr1	189310000	189320000
chr1	190000000	190010000
chr1	191430000	191440000
chr1	191530000	191540000
chr1	191970000	191980000
chr1	195150000	195160000
chr1	195420000	195440000
chr1	196200000	196210000
chr1	196790000	196800000
chr1	199150000	199160000
chr1	200760000	200770000
chr1	223040000	223050000
chr1	225280000	225290000
chr1	227840000	227850000
chr1	243870000	243880000
chr1	247900000	247910000
chr1	248170000	248190000
chr1	248270000	248280000
chr3	30470000	30480000
chr3	46820000	46830000
chr3	47160000	47170000
chr3	47650000	47670000
chr3	47710000	47730000
chr3	47990000	48000000
chr3	48030000	48040000
chr3	48340000	48370000
chr3	48400000	48410000
chr3	48420000	48440000
chr3	48480000	48500000
chr3	48780000	48790000
chr3	48800000	48810000
chr3	48840000	48850000
chr3	52660000	52670000
chr3	83250000	83260000
chr3	84050000	84060000
chr3	95190000	95200000
chr3	98000000	98010000
chr3	101730000	101750000
chr3	102950000	102960000
chr3	103550000	103560000
chr3	120750000	120760000
chr3	124990000	125010000
chr3	125030000	125040000
chr3	164670000	164680000
chr3	189380000	189390000
chr3	196800000	196810000
chr3	196880000	196890000
chr5	180340000	180350000
chr5	180370000	180380000
chr5	180400000	180410000
chr6	29380000	29390000
chr6	31210000	31220000
chr6	32490000	32500000
chr7	62140000	62150000
chr8	2550000	2560000
chr8	2630000	2640000
chr8	2760000	2770000
chr8	3770000	3780000
chr8	4030000	4040000
chr8	4720000	4730000
chr8	4750000	4760000
chr8	5130000	5140000
chr8	5170000	5180000
chr8	5190000	5200000
chr8	8210000	8220000
chr8	8270000	8300000
chr8	8340000	8360000
chr8	8410000	8420000
chr8	8700000	8710000
chr8	8760000	8770000
chr8	9460000	9490000
chr8	13820000	13830000
chr8	13870000	13890000
chr8	13900000	13910000
chr8	13930000	13940000
chr8	14000000	14010000
chr8	14370000	14400000
chr8	14410000	14420000
chr8	14440000	14450000
chr8	14490000	14510000
chr8	14540000	14550000
chr8	14660000	14670000
chr8	15690000	15700000
chr8	15840000	15850000
chr8	16150000	16160000
chr8	16310000	16320000
chr8	16380000	16390000
chr8	16430000	16440000
chr8	16810000	16820000
chr8	17570000	17590000
chr8	17610000	17620000
chr8	17720000	17730000
chr8	18110000	18120000
chr8	18190000	18240000
chr8	18260000	18270000
chr8	18330000	18340000
chr8	18370000	18380000
chr8	18910000	18920000
chr8	18970000	18980000
chr8	18990000	19000000
chr8	19060000	19070000
chr8	19480000	19490000
chr8	19500000	19510000
chr8	19520000	19530000
chr8	19830000	19840000
chr8	22300000	22310000
chr8	22320000	22330000
chr8	22350000	22360000
chr8	22380000	22400000
chr8	23100000	23110000
chr8	23670000	23680000
chr8	23720000	23730000
chr8	23750000	23760000
chr8	23770000	23780000
chr8	23800000	23820000
chr8	23830000	23960000
chr8	23990000	24000000
chr8	24010000	24020000
chr8	24110000	24120000
chr8	24190000	24210000
chr8	26190000	26200000
chr8	26820000	26830000
chr8	26910000	26920000
chr8	28770000	28780000
chr8	28810000	28830000
chr8	28840000	28850000
chr8	28860000	28880000
chr8	28890000	28900000
chr8	29300000	29320000
chr8	29500000	29510000
chr8	29540000	29550000
chr8	29610000	29620000
chr8	29720000	29730000
chr8	29770000	29790000
chr8	30850000	30860000
chr8	34580000	34590000
chr8	36340000	36350000
chr8	38160000	38180000
chr8	39150000	39160000
chr8	39240000	39250000
chr8	39560000	39570000
chr8	40300000	40310000
chr8	41850000	41860000
chr8	43170000	43180000
chr8	43230000	43240000
chr8	43430000	43500000
chr8	43510000	43550000
chr8	43570000	43640000
chr8	43650000	43720000
chr8	47420000	47430000
chr8	47440000	47450000
chr8	48360000	48370000
chr8	48400000	48410000
chr8	71220000	71230000
chr8	74390000	74410000
chr8	80830000	80840000
chr8	80870000	80880000
chr8	83610000	83620000
chr8	83780000	83790000
chr8	83860000	83870000
chr8	85770000	85790000
chr8	101300000	101370000
chr8	101390000	101410000
chr8	101460000	101470000
chr8	102900000	102910000
chr8	102970000	102990000
chr8	105050000	105060000
chr8	114200000	114210000
chr8	114830000	114840000
chr8	121300000	121310000
chr8	122430000	122440000
chr8	125750000	125760000
chr8	125820000	125830000
chr8	126190000	126200000
chr8	126240000	126250000
chr8	126290000	126300000
chr8	126340000	126350000
chr8	141820000	141830000
chr8	141850000	141860000
chr8	141890000	141970000
chr8	141980000	141990000
chr8	142000000	142010000
chr8	142210000	142220000
chr8	143920000	143930000
chr8	143940000	143950000
chr8	143970000	143990000
chr8	144540000	144550000
chr8	144710000	144720000
chr8	144730000	144750000
chr8	144840000	144850000
chr8	144860000	144870000
chr8	144970000	144990000
chr8	145070000	145080000
chr8	145780000	145800000
chr8	145830000	145850000
chr8	145870000	145880000
chr8	145890000	145900000
chr8	145920000	145930000
chr8	145940000	145960000
chr8	146100000	146110000
chr8	146120000	146140000
chr8	146160000	146170000
chr8	146210000	146220000
chr9	2460000	2470000
chr9	3330000	3340000
chr9	5960000	5970000
chr9	12860000	12870000
chr9	14650000	14660000
chr9	17220000	17230000
chr9	17970000	17980000
chr9	24550000	24560000
chr9	35220000	35230000
chr9	35250000	35260000
chr9	35870000	35890000
chr9	36050000	36060000
chr9	37140000	37150000
chr9	37200000	37220000
chr9	37240000	37260000
chr9	75060000	75070000
chr9	76030000	76040000
chr9	86720000	86730000
chr9	86770000	86780000
chr9	96540000	96550000
chr9	125930000	125940000
chr9	125980000	125990000
chr9	129760000	129770000
chr9	139820000	139830000
chr12	250000	270000
chr12	290000	330000
chr12	340000	450000
chr12	460000	480000
chr12	540000	570000
chr12	590000	620000
chr12	640000	650000
chr12	700000	870000
chr12	880000	1010000
chr12	1130000	1190000
chr12	1250000	1260000
chr12	1270000	1570000
chr12	1580000	1590000
chr12	1800000	1820000
chr12	1840000	1900000
chr12	2000000	2020000
chr12	2080000	2090000
chr12	2100000	2110000
chr12	2270000	2280000
chr12	2330000	2350000
chr12	2510000	2520000
chr12	2810000	2830000
chr12	3000000	3010000
chr12	3020000	3050000
chr12	3490000	3510000
chr12	3530000	3540000
chr12	3630000	3640000
chr12	3650000	3660000
chr12	3770000	3780000
chr12	4140000	4350000
chr12	4360000	4380000
chr12	4580000	4590000
chr12	4600000	4640000
chr12	4660000	4670000
chr12	4720000	4740000
chr12	4760000	4780000
chr12	4810000	4820000
chr12	4850000	4860000
chr12	4970000	5000000
chr12	5010000	5030000
chr12	5040000	5050000
chr12	5060000	5070000
chr12	5360000	5530000
chr12	5650000	5670000
chr12	5750000	5770000
chr12	5860000	5880000
chr12	6230000	6240000
chr12	6280000	6290000
chr12	6300000	6310000
chr12	6320000	6330000
chr12	6350000	6360000
chr12	6380000	6390000
chr12	6440000	6450000
chr12	6470000	6480000
chr12	6500000	6510000
chr12	6520000	6590000
chr12	6600000	6620000
chr12	6630000	6640000
chr12	6670000	6690000
chr12	6750000	6800000
chr12	6830000	6870000
chr12	6880000	6920000
chr12	7080000	7090000
chr12	7110000	7150000
chr12	7160000	7190000
chr12	7240000	7250000
chr12	7390000	7400000
chr12	7410000	7480000
chr12	7490000	7540000
chr12	7550000	7680000
chr12	7720000	7750000
chr12	7950000	7960000
chr12	8040000	8050000
chr12	8120000	8130000
chr12	8140000	8150000
chr12	8280000	8290000
chr12	8300000	8310000
chr12	8690000	8700000
chr12	8860000	8890000
chr12	8900000	8940000
chr12	8970000	8980000
chr12	8990000	9040000
chr12	9140000	9150000
chr12	9220000	9250000
chr12	9260000	9270000
chr12	9290000	9320000
chr12	9330000	9370000
chr12	9390000	9440000
chr12	9770000	9780000
chr12	9790000	9800000
chr12	9840000	9860000
chr12	9870000	9880000
chr12	9890000	10250000
chr12	10270000	10310000
chr12	10320000	10330000
chr12	10480000	10490000
chr12	10500000	10510000
chr12	10530000	10570000
chr12	10600000	10620000
chr12	10630000	10700000
chr12	10740000	10770000
chr12	10810000	10830000
chr12	10960000	11000000
chr12	11010000	11030000
chr12	11040000	11050000
chr12	11060000	11110000
chr12	11120000	11180000
chr12	11190000	11200000
chr12	11210000	11230000
chr12	11250000	11280000
chr12	11290000	11310000
chr12	11370000	11380000
chr12	11400000	11440000
chr12	11460000	11500000
chr12	11510000	11530000
chr12	11560000	11570000
chr12	11820000	11870000
chr12	11880000	11990000
chr12	12010000	12020000
chr12	12030000	12050000
chr12	12070000	12080000
chr12	12270000	12300000
chr12	12320000	12370000
chr12	12380000	12420000
chr12	12590000	12600000
chr12	12630000	12680000
chr12	12690000	12720000
chr12	12730000	12740000
chr12	13170000	13180000
chr12	13230000	13240000
chr12	13300000	13310000
chr12	13660000	13680000
chr12	13740000	13750000
chr12	13810000	13820000
chr12	13950000	13960000
chr12	14010000	14030000
chr12	14090000	14100000
chr12	14200000	14210000
chr12	14510000	14550000
chr12	14560000	14580000
chr12	14600000	14630000
chr12	14780000	14790000
chr12	14990000	15010000
chr12	15140000	15160000
chr12	15250000	15260000
chr12	15280000	15290000
chr12	15420000	15440000
chr12	15450000	15470000
chr12	15480000	15490000
chr12	15540000	15570000
chr12	15580000	15610000
chr12	15640000	15650000
chr12	15780000	15790000
chr12	15800000	15840000
chr12	15850000	15910000
chr12	15920000	15940000
chr12	16610000	16620000
chr12	16640000	16650000
chr12	16700000	16720000
chr12	16770000	16780000
chr12	16820000	16830000
chr12	16880000	16900000
chr12	16920000	16940000
chr12	16980000	16990000
chr12	17040000	17050000
chr12	17060000	17070000
chr12	17130000	17140000
chr12	17260000	17270000
chr12	17280000	17310000
chr12	17320000	17330000
chr12	17370000	17390000
chr12	17400000	17450000
chr12	17490000	17500000
chr12	17510000	17530000
chr12	17540000	17550000
chr12	17570000	17620000
chr12	17650000	17660000
chr12	17670000	17680000
chr12	17720000	17750000
chr12	17860000	17870000
chr12	17890000	17910000
chr12	17920000	17930000
chr12	17940000	17950000
chr12	17980000	17990000
chr12	18010000	18050000
chr12	18060000	18080000
chr12	18090000	18100000
chr12	18460000	18470000
chr12	18540000	18550000
chr12	18570000	18580000
chr12	18650000	18660000
chr12	18680000	18690000
chr12	18830000	18840000
chr12	18920000	18930000
chr12	19110000	19120000
chr12	20150000	20170000
chr12	20230000	20240000
chr12	20270000	20280000
chr12	20300000	20340000
chr12	20420000	20450000
chr12	20470000	20480000
chr12	20580000	20590000
chr12	20620000	20630000
chr12	20650000	20660000
chr12	20850000	20860000
chr12	20880000	20890000
chr12	21010000	21090000
chr12	21120000	21130000
chr12	21180000	21230000
chr12	21240000	21300000
chr12	21350000	21360000
chr12	21420000	21430000
chr12	21450000	21460000
chr12	21520000	21530000
chr12	21550000	21570000
chr12	21710000	21720000
chr12	21890000	21900000
chr12	21930000	21940000
chr12	21950000	21980000
chr12	21990000	22020000
chr12	22030000	22050000
chr12	22060000	22080000
chr12	22300000	22320000
chr12	22330000	22360000
chr12	22370000	22440000
chr12	22450000	22480000
chr12	22780000	22790000
chr12	23440000	23450000
chr12	23480000	23490000
chr12	23500000	23510000
chr12	23520000	23530000
chr12	23550000	23560000
chr12	23780000	23790000
chr12	23810000	23820000
chr12	23830000	23840000
chr12	23910000	23950000
chr12	23980000	24010000
chr12	24090000	24100000
chr12	24510000	24520000
chr12	24540000	24550000
chr12	24560000	24580000
chr12	24590000	24600000
chr12	24610000	24620000
chr12	24630000	24640000
chr12	24650000	24660000
chr12	25140000	25160000
chr12	25250000	25260000
chr12	25440000	25450000
chr12	25690000	25700000
chr12	25750000	25770000
chr12	25860000	25880000
chr12	25900000	25920000
chr12	25940000	25960000
chr12	25980000	26000000
chr12	26350000	26370000
chr12	26380000	26420000
chr12	26450000	26460000
chr12	26470000	26490000
chr12	26520000	26530000
chr12	26630000	26650000
chr12	26660000	26680000
chr12	26710000	26720000
chr12	26730000	26750000
chr12	27160000	27170000
chr12	27190000	27200000
chr12	27210000	27220000
chr12	27230000	27270000
chr12	27290000	27340000
chr12	27370000	27380000
chr12	27390000	27440000
chr12	27580000	27590000
chr12	27610000	27630000
chr12	27660000	27740000
chr12	27780000	27790000
chr12	27800000	27810000
chr12	28270000	28280000
chr12	28380000	28390000
chr12	28460000	28500000
chr12	28530000	28540000
chr12	28580000	28590000
chr12	28600000	28610000
chr12	28620000	28650000
chr12	28800000	28820000
chr12	28850000	28880000
chr12	28890000	28900000
chr12	29340000	29350000
chr12	30050000	30060000
chr12	30120000	30130000
chr12	32710000	32720000
chr12	33320000	33330000
chr12	33340000	33350000
chr12	33370000	33380000
chr12	33400000	33410000
chr12	33460000	33470000
chr12	33520000	33540000
chr12	33550000	33580000
chr12	33620000	33630000
chr12	33710000	33720000
chr12	33730000	33740000
chr12	33790000	33800000
chr12	33810000	33820000
chr12	33850000	33880000
chr12	33890000	33920000
chr12	33930000	33940000
chr12	33980000	33990000
chr12	34000000	34040000
chr12	34050000	34070000
chr12	34340000	34350000
chr12	34560000	34580000
chr12	34590000	34600000
chr12	34640000	34730000
chr12	38010000	38050000
chr12	38060000	38070000
chr12	38110000	38120000
chr12	38140000	38150000
chr12	38160000	38170000
chr12	38190000	38280000
chr12	38300000	38330000
chr12	38360000	38370000
chr12	38390000	38420000
chr12	38430000	38440000
chr12	38570000	38580000
chr12	38870000	38880000
chr12	38990000	39000000
chr12	39010000	39020000
chr12	39130000	39140000
chr12	39180000	39190000
chr12	39230000	39240000
chr12	39360000	39370000
chr12	39390000	39400000
chr12	39410000	39420000
chr12	40260000	40270000
chr12	40290000	40300000
chr12	40680000	40690000
chr12	40840000	40850000
chr12	41060000	41070000
chr12	41160000	41180000
chr12	41200000	41210000
chr12	41230000	41240000
chr12	43880000	43890000
chr12	43910000	43920000
chr12	43970000	43980000
chr12	44000000	44010000
chr12	44070000	44080000
chr12	44190000	44200000
chr12	44500000	44510000
chr12	44580000	44590000
chr12	44630000	44640000
chr12	44680000	44690000
chr12	44780000	44790000
chr12	44940000	44950000
chr12	44990000	45010000
chr12	45090000	45100000
chr12	45120000	45130000
chr12	45680000	45700000
chr12	45720000	45730000
chr12	46800000	46810000
chr12	46820000	46830000
chr12	46860000	46870000
chr12	46880000	46910000
chr12	46950000	46960000
chr12	46970000	46980000
chr12	47140000	47160000
chr12	47200000	47210000
chr12	47730000	47740000
chr12	47820000	47830000
chr12	47870000	47880000
chr12	48630000	48670000
chr12	48760000	48780000
chr12	48810000	48820000
chr12	48830000	48860000
chr12	48890000	48900000
chr12	49520000	49530000
chr12	49590000	49600000
chr12	49750000	49920000
chr12	50100000	50110000
chr12	50380000	50400000
chr12	50410000	50420000
chr12	50600000	50620000
chr12	50640000	50660000
chr12	50670000	50700000
chr12	50900000	51020000
chr12	51030000	51040000
chr12	51050000	51070000
chr12	51220000	51230000
chr12	51240000	51280000
chr12	51310000	51320000
chr12	51350000	51360000
chr12	51370000	51380000
chr12	51490000	51500000
chr12	51860000	51870000
chr12	51970000	52040000
chr12	52050000	52090000
chr12	52100000	52160000
chr12	52170000	52180000
chr12	52610000	52620000
chr12	52660000	52670000
chr12	52850000	52860000
chr12	52870000	52880000
chr12	52890000	52900000
chr12	53130000	53140000
chr12	53150000	53160000
chr12	53570000	53580000
chr12	53590000	53600000
chr12	53990000	54000000
chr12	54010000	54020000
chr12	54270000	54280000
chr12	55150000	55170000
chr12	55180000	55200000
chr12	55220000	55280000
chr12	55290000	55310000
chr12	55320000	55330000
chr12	55460000	55480000
chr12	55510000	55520000
chr12	55530000	55540000
chr12	55590000	55600000
chr12	55620000	55630000
chr12	55640000	55710000
chr12	55720000	55730000
chr12	55740000	55800000
chr12	55820000	55850000
chr12	56320000	56330000
chr12	57210000	57240000
chr12	57270000	57280000
chr12	57300000	57320000
chr12	57450000	57460000
chr12	57680000	57720000
chr12	57730000	57740000
chr12	57760000	57770000
chr12	58500000	58510000
chr12	59140000	59150000
chr12	59380000	59390000
chr12	59430000	59440000
chr12	60010000	60020000
chr12	60100000	60120000
chr12	60660000	60670000
chr12	60720000	60730000
chr12	61000000	61010000
chr12	61020000	61030000
chr12	61120000	61180000
chr12	61250000	61260000
chr12	61460000	61490000
chr12	61700000	61710000
chr12	61720000	61730000
chr12	62140000	62150000
chr12	62180000	62200000
chr12	63580000	63600000
chr12	63760000	63780000
chr12	64430000	64450000
chr12	66220000	66230000
chr12	68830000	68860000
chr12	68870000	68900000
chr12	68910000	68940000
chr12	69380000	69390000
chr12	69850000	69860000
chr12	69870000	69880000
chr12	69890000	69900000
chr12	69930000	69940000
chr12	70410000	70420000
chr12	70450000	70460000
chr12	71630000	71660000
chr12	71690000	71710000
chr12	71720000	71730000
chr12	71740000	71770000
chr12	71830000	71840000
chr12	72020000	72030000
chr12	72880000	72890000
chr12	73520000	73530000
chr12	73560000	73570000
chr12	73600000	73610000
chr12	73630000	73640000
chr12	73660000	73670000
chr12	73720000	73730000
chr12	73790000	73810000
chr12	73950000	73960000
chr12	73990000	74000000
chr12	74170000	74180000
chr12	74520000	74530000
chr12	75270000	75280000
chr12	75290000	75300000
chr12	75330000	75340000
chr12	75350000	75360000
chr12	75380000	75400000
chr12	75410000	75420000
chr12	75440000	75450000
chr12	75470000	75480000
chr12	75540000	75550000
chr12	76050000	76060000
chr12	76070000	76080000
chr12	76090000	76110000
chr12	76130000	76160000
chr12	76180000	76190000
chr12	76210000	76220000
chr12	76240000	76270000
chr12	76330000	76340000
chr12	77890000	77910000
chr12	79160000	79180000
chr12	79480000	79490000
chr12	80410000	80420000
chr12	80940000	80950000
chr12	80990000	81000000
chr12	81090000	81100000
chr12	81400000	81410000
chr12	81440000	81450000
chr12	81480000	81490000
chr12	81760000	81770000
chr12	82170000	82190000
chr12	82230000	82250000
chr12	82270000	82280000
chr12	82430000	82460000
chr12	82520000	82540000
chr12	84470000	84480000
chr12	85260000	85280000
chr12	85290000	85300000
chr12	85380000	85390000
chr12	85400000	85440000
chr12	85530000	85550000
chr12	85570000	85580000
chr12	85610000	85660000
chr12	85680000	85690000
chr12	86080000	86090000
chr12	86100000	86120000
chr12	86160000	86180000
chr12	86190000	86200000
chr12	86220000	86230000
chr12	86510000	86520000
chr12	86580000	86600000
chr12	86670000	86680000
chr12	86710000	86720000
chr12	86900000	86910000
chr12	86970000	86990000
chr12	87030000	87040000
chr12	87050000	87060000
chr12	87130000	87150000
chr12	87180000	87190000
chr12	87210000	87230000
chr12	87240000	87260000
chr12	87320000	87350000
chr12	87400000	87410000
chr12	87430000	87440000
chr12	87450000	87460000
chr12	87480000	87500000
chr12	87530000	87540000
chr12	87570000	87580000
chr12	88680000	88690000
chr12	88730000	88740000
chr12	88750000	88760000
chr12	88790000	88820000
chr12	88880000	88910000
chr12	89120000	89130000
chr12	89170000	89190000
chr12	89210000	89230000
chr12	89530000	89540000
chr12	89550000	89560000
chr12	89570000	89580000
chr12	89600000	89620000
chr12	89630000	89650000
chr12	89670000	89680000
chr12	89690000	89700000
chr12	90570000	90580000
chr12	90780000	90790000
chr12	90920000	90940000
chr12	90970000	90980000
chr12	91070000	91080000
chr12	91150000	91160000
chr12	91200000	91210000
chr12	91440000	91460000
chr12	91490000	91500000
chr12	91520000	91530000
chr12	91540000	91550000
chr12	91570000	91580000
chr12	91590000	91610000
chr12	91640000	91650000
chr12	91850000	91860000
chr12	91910000	91930000
chr12	92040000	92050000
chr12	92080000	92090000
chr12	92100000	92130000
chr12	92140000	92150000
chr12	92170000	92180000
chr12	92210000	92230000
chr12	92260000	92270000
chr12	92280000	92300000
chr12	92320000	92360000
chr12	92380000	92390000
chr12	92420000	92430000
chr12	92640000	92650000
chr12	92690000	92700000
chr12	92740000	92770000
chr12	93530000	93540000
chr12	93570000	93590000
chr12	93600000	93610000
chr12	93630000	93640000
chr12	94080000	94100000
chr12	94130000	94140000
chr12	94180000	94190000
chr12	94260000	94270000
chr12	94730000	94740000
chr12	94760000	94770000
chr12	95610000	95620000
chr12	95690000	95700000
chr12	96700000	96710000
chr12	96720000	96730000
chr12	99790000	99800000
chr12	99820000	99830000
chr12	99870000	99880000
chr12	99970000	99980000
chr12	101310000	101320000
chr12	102650000	102660000
chr12	102690000	102700000
chr12	102710000	102720000
chr12	102880000	102890000
chr12	103540000	103550000
chr12	103560000	103570000
chr12	103580000	103590000
chr12	105280000	105290000
chr12	106020000	106030000
chr12	109060000	109070000
chr12	109190000	109200000
chr12	110570000	110580000
chr12	110600000	110630000
chr12	110650000	110680000
chr12	110720000	110730000
chr12	110740000	110780000
chr12	110930000	110940000
chr12	111010000	111020000
chr12	111030000	111040000
chr12	111930000	111940000
chr12	111950000	111960000
chr12	112380000	112400000
chr12	112470000	112500000
chr12	112510000	112530000
chr12	112680000	112710000
chr12	112760000	112770000
chr12	112780000	112810000
chr12	116550000	116570000
chr12	116580000	116600000
chr12	116620000	116640000
chr12	118620000	118630000
chr12	118770000	118780000
chr12	121220000	121340000
chr12	121770000	121780000
chr12	122390000	122400000
chr12	122430000	122440000
chr12	122520000	122530000
chr12	122880000	122890000
chr12	122960000	122970000
chr12	123080000	123090000
chr12	123110000	123120000
chr12	123160000	123170000
chr12	123230000	123240000
chr12	123530000	123540000
chr12	123640000	123650000
chr12	124310000	124320000
chr15	20190000	20200000
chr15	25360000	25380000
chr15	25540000	25550000
chr15	25630000	25640000
chr15	25650000	25660000
chr15	25990000	26000000
chr15	26740000	26750000
chr15	27540000	27550000
chr15	27670000	27680000
chr15	27800000	27810000
chr15	27870000	27880000
chr15	29200000	29220000
chr15	30090000	30110000
chr15	30220000	30230000
chr15	31260000	31270000
chr15	31280000	31290000
chr15	31360000	31370000
chr15	32140000	32150000
chr15	32210000	32220000
chr15	32230000	32240000
chr15	32340000	32350000
chr15	32370000	32380000
chr15	33070000	33080000
chr15	33120000	33150000
chr15	33160000	33170000
chr15	33180000	33190000
chr15	33200000	33210000
chr15	33230000	33240000
chr15	33260000	33270000
chr15	33680000	33700000
chr15	33710000	33720000
chr15	33730000	33740000
chr15	33750000	33760000
chr15	33790000	33800000
chr15	33830000	33840000
chr15	33850000	33860000
chr15	33880000	33890000
chr15	35700000	35710000
chr15	36220000	36230000
chr15	36430000	36440000
chr15	36660000	36670000
chr15	37100000	37110000
chr15	37240000	37260000
chr15	37280000	37290000
chr15	37640000	37650000
chr15	37690000	37700000
chr15	37730000	37750000
chr15	37770000	37790000
chr15	37800000	37820000
chr15	37900000	37930000
chr15	37970000	37980000
chr15	38020000	38030000
chr15	38420000	38430000
chr15	38440000	38460000
chr15	38490000	38510000
chr15	38620000	38630000
chr15	39250000	39270000
chr15	39560000	39570000
chr15	39580000	39590000
chr15	39650000	39660000
chr15	39770000	39780000
chr15	40500000	40520000
chr15	40920000	40930000
chr15	41290000	41320000
chr15	41330000	41380000
chr15	41390000	41400000
chr15	41460000	41470000
chr15	41910000	41920000
chr15	41940000	42070000
chr15	42600000	42610000
chr15	43070000	43090000
chr15	43110000	43130000
chr15	43140000	43170000
chr15	43350000	43360000
chr15	43480000	43490000
chr15	44250000	44260000
chr15	44320000	44330000
chr15	44340000	44350000
chr15	44370000	44380000
chr15	44460000	44470000
chr15	44950000	44960000
chr15	45040000	45050000
chr15	45650000	45660000
chr15	46300000	46320000
chr15	46410000	46420000
chr15	46770000	46780000
chr15	46810000	46830000
chr15	47120000	47130000
chr15	47300000	47310000
chr15	47340000	47350000
chr15	48080000	48090000
chr15	48180000	48190000
chr15	48750000	48760000
chr15	48810000	48820000
chr15	49780000	49790000
chr15	49800000	49810000
chr15	49820000	49830000
chr15	49860000	49870000
chr15	49890000	49900000
chr15	49950000	49980000
chr15	50050000	50080000
chr15	50110000	50120000
chr15	50370000	50380000
chr15	50910000	50920000
chr15	50990000	51000000
chr15	51150000	51160000
chr15	52350000	52360000
chr15	52700000	52710000
chr15	53310000	53320000
chr15	53340000	53350000
chr15	53440000	53450000
chr15	53580000	53590000
chr15	53730000	53740000
chr15	53850000	53870000
chr15	53930000	53940000
chr15	54410000	54420000
chr15	54440000	54450000
chr15	54470000	54480000
chr15	54520000	54530000
chr15	54570000	54580000
chr15	54670000	54680000
chr15	54730000	54740000
chr15	54750000	54770000
chr15	54780000	54790000
chr15	54840000	54860000
chr15	54900000	54930000
chr15	54940000	54960000
chr15	55020000	55030000
chr15	55200000	55230000
chr15	55240000	55250000
chr15	55260000	55270000
chr15	56000000	56010000
chr15	56460000	56490000
chr15	56550000	56560000
chr15	56610000	56620000
chr15	56930000	56960000
chr15	57220000	57230000
chr15	57250000	57270000
chr15	57280000	57290000
chr15	57310000	57330000
chr15	57350000	57370000
chr15	57420000	57430000
chr15	58120000	58130000
chr15	58220000	58230000
chr15	58880000	58890000
chr15	58990000	59000000
chr15	59380000	59390000
chr15	60110000	60120000
chr15	60200000	60210000
chr15	60240000	60250000
chr15	60340000	60350000
chr15	61550000	61560000
chr15	61670000	61680000
chr15	62200000	62210000
chr15	62250000	62260000
chr15	62280000	62290000
chr15	62310000	62330000
chr15	63570000	63600000
chr15	63690000	63700000
chr15	63800000	63810000
chr15	63840000	63850000
chr15	64010000	64020000
chr15	64040000	64060000
chr15	64070000	64140000
chr15	64160000	64170000
chr15	64180000	64190000
chr15	64240000	64250000
chr15	64500000	64510000
chr15	64520000	64550000
chr15	64600000	64610000
chr15	64620000	64650000
chr15	64730000	64760000
chr15	64770000	64820000
chr15	64830000	64840000
chr15	64850000	64900000
chr15	64910000	64920000
chr15	65440000	65450000
chr15	65960000	65990000
chr15	66010000	66050000
chr15	66060000	66080000
chr15	66110000	66120000
chr15	67360000	67380000
chr15	67420000	67430000
chr15	67440000	67450000
chr15	67510000	67520000
chr15	67890000	67910000
chr15	67920000	67930000
chr15	67940000	68000000
chr15	68010000	68030000
chr15	68240000	68250000
chr15	68320000	68350000
chr15	68370000	68390000
chr15	68410000	68420000
chr15	69020000	69030000
chr15	69460000	69570000
chr15	70620000	70630000
chr15	71270000	71280000
chr15	72200000	72210000
chr15	72220000	72250000
chr15	72260000	72280000
chr15	72320000	72330000
chr15	72700000	72710000
chr15	72720000	72740000
chr15	72780000	72790000
chr15	73200000	73230000
chr15	73260000	73280000
chr15	73290000	73300000
chr15	73480000	73490000
chr15	73760000	73770000
chr15	73830000	73840000
chr15	73850000	73860000
chr15	73920000	73930000
chr15	74430000	74450000
chr15	75370000	75380000
chr15	75420000	75430000
chr15	75770000	75780000
chr15	75820000	75830000
chr15	76700000	76710000
chr15	76770000	76790000
chr15	76810000	76820000
chr15	76830000	76840000
chr15	76850000	76880000
chr15	76930000	76940000
chr15	76950000	77020000
chr15	77040000	77050000
chr15	77510000	77520000
chr15	77550000	77580000
chr15	77590000	77700000
chr15	77710000	77720000
chr15	80980000	80990000
chr15	81530000	81550000
chr15	81560000	81570000
chr15	81920000	81940000
chr15	81970000	81990000
chr15	82020000	82030000
chr15	82120000	82130000
chr15	82230000	82240000
chr15	82280000	82290000
chr15	84050000	84060000
chr15	84390000	84400000
chr15	84600000	84610000
chr15	85250000	85260000
chr15	85940000	85950000
chr15	85980000	85990000
chr15	86010000	86050000
chr15	86080000	86090000
chr15	86100000	86110000
chr15	86130000	86170000
chr15	86200000	86210000
chr15	87040000	87050000
chr15	87650000	87660000
chr15	87690000	87700000
chr15	87860000	87870000
chr15	90410000	90420000
chr15	90860000	90870000
chr15	90920000	91010000
chr15	91020000	91040000
chr15	91080000	91090000
chr15	91280000	91300000
chr15	91310000	91320000
chr15	91340000	91350000
chr15	91630000	91640000
chr15	91730000	91740000
chr15	92000000	92010000
chr15	92030000	92040000
chr15	92790000	92800000
chr15	93090000	93100000
chr15	93430000	93450000
chr15	94730000	94740000
chr15	97070000	97080000
chr15	97530000	97540000
chr15	98070000	98090000
chr15	98110000	98120000
chr15	98130000	98140000
chr15	98180000	98200000
chr15	98510000	98520000
chr15	98600000	98620000
chr15	99280000	99290000
chr15	99310000	99330000
chr15	99340000	99350000
chr15	99900000	99920000
chr15	100060000	100090000
chr15	100120000	100140000
chr15	100940000	100960000
chr15	100990000	101000000
chr15	101010000	101020000
chr15	101110000	101120000
chr15	101280000	101300000
chr15	101750000	101760000
chr15	101950000	101960000
chr15	102000000	102010000
chr15	102050000	102060000
chr15	102120000	102130000
chr15	102360000	102370000
chr16	34320000	34330000
chr16	34880000	34890000
chr16	35000000	35010000
chr16	35080000	35090000
chr17	120000	130000
chr17	160000	170000
chr17	200000	210000
chr17	440000	460000
chr17	760000	780000
chr17	810000	820000
chr17	1240000	1250000
chr17	1260000	1300000
chr17	1330000	1340000
chr17	1350000	1360000
chr17	1690000	1700000
chr17	1720000	1730000
chr17	1750000	1780000
chr17	1990000	2010000
chr17	2020000	2080000
chr17	2100000	2140000
chr17	2380000	2410000
chr17	2490000	2510000
chr17	2530000	2540000
chr17	2560000	2580000
chr17	3020000	3030000
chr17	3050000	3070000
chr17	3080000	3100000
chr17	3110000	3130000
chr17	3160000	3170000
chr17	3180000	3210000
chr17	3250000	3280000
chr17	3290000	3340000
chr17	4120000	4140000
chr17	4170000	4180000
chr17	4190000	4250000
chr17	4660000	4670000
chr17	4690000	4700000
chr17	4740000	4760000
chr17	4770000	4780000
chr17	5220000	5230000
chr17	5730000	5740000
chr17	5750000	5760000
chr17	5870000	5880000
chr17	6100000	6110000
chr17	6500000	6510000
chr17	6640000	6650000
chr17	6690000	6710000
chr17	6720000	6780000
chr17	6790000	6800000
chr17	6810000	6840000
chr17	6860000	6870000
chr17	7760000	7790000
chr17	7880000	7890000
chr17	8430000	8490000
chr17	8510000	8520000
chr17	8940000	8950000
chr17	9220000	9230000
chr17	9300000	9320000
chr17	10270000	10280000
chr17	10290000	10300000
chr17	10310000	10340000
chr17	10350000	10380000
chr17	10400000	10410000
chr17	10420000	10430000
chr17	10440000	10450000
chr17	10920000	10930000
chr17	10980000	10990000
chr17	12230000	12240000
chr17	12340000	12390000
chr17	12400000	12410000
chr17	12450000	12470000
chr17	12540000	12550000
chr17	12720000	12730000
chr17	13150000	13160000
chr17	13350000	13360000
chr17	13680000	13690000
chr17	13730000	13740000
chr17	13790000	13800000
chr17	14010000	14020000
chr17	14030000	14040000
chr17	14540000	14550000
chr17	14590000	14600000
chr17	14610000	14630000
chr17	15260000	15280000
chr17	15880000	15890000
chr17	15980000	16000000
chr17	16040000	16070000
chr17	16080000	16100000
chr17	16260000	16270000
chr17	17810000	17820000
chr17	19350000	19360000
chr17	19460000	19470000
chr17	19510000	19580000
chr17	19590000	19600000
chr17	21760000	21790000
chr17	21930000	21940000
chr17	21990000	22000000
chr17	22020000	22030000
chr17	22070000	22110000
chr17	22140000	22160000
chr17	25390000	25400000
chr17	25450000	25480000
chr17	26370000	26390000
chr17	26410000	26450000
chr17	26460000	26470000
chr17	27100000	27110000
chr17	27770000	27780000
chr17	27990000	28000000
chr17	28010000	28020000
chr17	28050000	28060000
chr17	28070000	28110000
chr17	28120000	28150000
chr17	28190000	28200000
chr17	28220000	28270000
chr17	28450000	28460000
chr17	28590000	28610000
chr17	28760000	28770000
chr17	28790000	28800000
chr17	29340000	29350000
chr17	29460000	29480000
chr17	29490000	29500000
chr17	29530000	29550000
chr17	29620000	29630000
chr17	29660000	29670000
chr17	29680000	29690000
chr17	29960000	29970000
chr17	30860000	30870000
chr17	30930000	30940000
chr17	30950000	30970000
chr17	30980000	30990000
chr17	31060000	31070000
chr17	32320000	32330000
chr17	32520000	32530000
chr17	32540000	32550000
chr17	32620000	32630000
chr17	32660000	32680000
chr17	33630000	33660000
chr17	33680000	33710000
chr17	33730000	33750000
chr17	33760000	33770000
chr17	33940000	33960000
chr17	33980000	33990000
chr17	34300000	34310000
chr17	34360000	34370000
chr17	34470000	34480000
chr17	35550000	35560000
chr17	37930000	37990000
chr17	38000000	38020000
chr17	38450000	38460000
chr17	38550000	38570000
chr17	38840000	38850000
chr17	38880000	38890000
chr17	39120000	39130000
chr17	39140000	39180000
chr17	39190000	39240000
chr17	39270000	39290000
chr17	39300000	39350000
chr17	39360000	39370000
chr17	39380000	39390000
chr17	39410000	39440000
chr17	39540000	39550000
chr17	40470000	40480000
chr17	40490000	40500000
chr17	40510000	40520000
chr17	41650000	41660000
chr17	41750000	41760000
chr17	44130000	44240000
chr17	44250000	44270000
chr17	45240000	45250000
chr17	45390000	45400000
chr17	45420000	45430000
chr17	46410000	46420000
chr17	46450000	46480000
chr17	46490000	46500000
chr17	46530000	46560000
chr17	47680000	47690000
chr17	49050000	49110000
chr17	49970000	49980000
chr17	50040000	50060000
chr17	50690000	50700000
chr17	50810000	50820000
chr17	50970000	50980000
chr17	51150000	51160000
chr17	51300000	51310000
chr17	51370000	51380000
chr17	51440000	51450000
chr17	51600000	51610000
chr17	52060000	52070000
chr17	52110000	52120000
chr17	52590000	52610000
chr17	52680000	52700000
chr17	52720000	52740000
chr17	52810000	52820000
chr17	53130000	53140000
chr17	53150000	53170000
chr17	53190000	53200000
chr17	53210000	53250000
chr17	53260000	53270000
chr17	54310000	54320000
chr17	56060000	56070000
chr17	56480000	56500000
chr17	56880000	56890000
chr17	56930000	56940000
chr17	56960000	56970000
chr17	57830000	57850000
chr17	57860000	57870000
chr17	57880000	57890000
chr17	58310000	58340000
chr17	58370000	58380000
chr17	58410000	58420000
chr17	58910000	58920000
chr17	58930000	58950000
chr17	58970000	58980000
chr17	59000000	59010000
chr17	59080000	59090000
chr17	59230000	59240000
chr17	59250000	59260000
chr17	59730000	59740000
chr17	59770000	59790000
chr17	59820000	59850000
chr17	59870000	59900000
chr17	61110000	61120000
chr17	61160000	61170000
chr17	61180000	61190000
chr17	61220000	61230000
chr17	61270000	61290000
chr17	61400000	61410000
chr17	61880000	61890000
chr17	62200000	62210000
chr17	63010000	63020000
chr17	63810000	63820000
chr17	63830000	63840000
chr17	64020000	64030000
chr17	66890000	66920000
chr17	66930000	66940000
chr17	66960000	66970000
chr17	67010000	67020000
chr17	67040000	67050000
chr17	67060000	67090000
chr17	67130000	67150000
chr17	67750000	67760000
chr17	67870000	67880000
chr17	67910000	67930000
chr17	67970000	67980000
chr17	68210000	68220000
chr17	68230000	68240000
chr17	68270000	68290000
chr17	68320000	68330000
chr17	68360000	68370000
chr17	68400000	68420000
chr17	68430000	68440000
chr17	68790000	68800000
chr17	68860000	68870000
chr17	68880000	68890000
chr17	68920000	68940000
chr17	68970000	68980000
chr17	68990000	69000000
chr17	69710000	69720000
chr17	73380000	73400000
chr17	73670000	73680000
chr17	74170000	74180000
chr17	74190000	74200000
chr17	74230000	74240000
chr17	74550000	74560000
chr17	75710000	75720000
chr17	78680000	78690000
chr17	80780000	80790000
chr17	80870000	80880000
chr17	80930000	80940000
chr17	80950000	80960000
chr18	180000	200000
chr18	390000	400000
chr18	410000	440000
chr18	460000	470000
chr18	490000	500000
chr18	1020000	1030000
chr18	1070000	1080000
chr18	1100000	1110000
chr18	1170000	1180000
chr18	1210000	1240000
chr18	1280000	1290000
chr18	1310000	1330000
chr18	1340000	1360000
chr18	1390000	1400000
chr18	1440000	1450000
chr18	1650000	1660000
chr18	1870000	1880000
chr18	2330000	2350000
chr18	2380000	2400000
chr18	2680000	2690000
chr18	2700000	2710000
chr18	2720000	2800000
chr18	2980000	3020000
chr18	3080000	3090000
chr18	3120000	3150000
chr18	3440000	3470000
chr18	3510000	3520000
chr18	3540000	3550000
chr18	3860000	3880000
chr18	4630000	4640000
chr18	6060000	6070000
chr18	6730000	6740000
chr18	8870000	8880000
chr18	9160000	9170000
chr18	9240000	9250000
chr18	9570000	9580000
chr18	10390000	10400000
chr18	11310000	11320000
chr18	11330000	11340000
chr18	11350000	11360000
chr18	11410000	11420000
chr18	12160000	12170000
chr18	12470000	12480000
chr18	12530000	12540000
chr18	12550000	12580000
chr18	12800000	12820000
chr18	12830000	12860000
chr18	12880000	12890000
chr18	13030000	13050000
chr18	18940000	18950000
chr18	19950000	19960000
chr18	20400000	20460000
chr18	20470000	20530000
chr18	20550000	20580000
chr18	21340000	21350000
chr18	21410000	21420000
chr18	21490000	21500000
chr18	21600000	21610000
chr18	25040000	25050000
chr18	26470000	26480000
chr18	30540000	30550000
chr18	31740000	31750000
chr18	46330000	46340000
chr18	46560000	46570000
chr18	46620000	46630000
chr18	46700000	46710000
chr18	46800000	46810000
chr18	56600000	56610000
chr18	60410000	60420000
chr18	60450000	60460000
chr18	60470000	60480000
chr18	60570000	60580000
chr18	60850000	60870000
chr18	60880000	60890000
chr18	60950000	60960000
chr18	64570000	64580000
chr18	65040000	65050000
chr18	65890000	65900000
chr18	76850000	76860000
chr19	350000	360000
chr19	1020000	1040000
chr19	1190000	1200000
chr19	1660000	1670000
chr19	1690000	1700000
chr19	1770000	1780000
chr19	2230000	2240000
chr19	2530000	2540000
chr19	2580000	2590000
chr19	3070000	3080000
chr19	6090000	6100000
chr19	6120000	6130000
chr19	6170000	6190000
chr19	6570000	6580000
chr19	6620000	6630000
chr19	6680000	6690000
chr19	8520000	8530000
chr19	8960000	8970000
chr19	9050000	9060000
chr19	9070000	9080000
chr19	9360000	9370000
chr19	9400000	9410000
chr19	9440000	9470000
chr19	9480000	9490000
chr19	9500000	9510000
chr19	9520000	9530000
chr19	9560000	9570000
chr19	9590000	9600000
chr19	9740000	9750000
chr19	9760000	9790000
chr19	9800000	9820000
chr19	9830000	9870000
chr19	10640000	10650000
chr19	10690000	10700000
chr19	11400000	11410000
chr19	11790000	11800000
chr19	11880000	11920000
chr19	11970000	11990000
chr19	12030000	12040000
chr19	12070000	12110000
chr19	12120000	12140000
chr19	12180000	12200000
chr19	12210000	12220000
chr19	12350000	12360000
chr19	12430000	12440000
chr19	12450000	12470000
chr19	12510000	12520000
chr19	12570000	12580000
chr19	13140000	13150000
chr19	13440000	13450000
chr19	13480000	13490000
chr19	13520000	13530000
chr19	13550000	13570000
chr19	13600000	13610000
chr19	14730000	14740000
chr19	14900000	14910000
chr19	14940000	14950000
chr19	14990000	15020000
chr19	15040000	15050000
chr19	15370000	15380000
chr19	15390000	15410000
chr19	15420000	15450000
chr19	15800000	15880000
chr19	15910000	15940000
chr19	16010000	16020000
chr19	16050000	16060000
chr19	16080000	16090000
chr19	16350000	16360000
chr19	16460000	16470000
chr19	16500000	16510000
chr19	17040000	17050000
chr19	17060000	17070000
chr19	17740000	17750000
chr19	18100000	18110000
chr19	18360000	18370000
chr19	18810000	18820000
chr19	19510000	19520000
chr19	19580000	19590000
chr19	19870000	19880000
chr19	19900000	19910000
chr19	19930000	19940000
chr19	20160000	20170000
chr19	20240000	20250000
chr19	20290000	20300000
chr19	20310000	20320000
chr19	20490000	20510000
chr19	20680000	20690000
chr19	20880000	20890000
chr19	20900000	20920000
chr19	21930000	21940000
chr19	22180000	22190000
chr19	22200000	22220000
chr19	22250000	22280000
chr19	22310000	22330000
chr19	22350000	22380000
chr19	22520000	22540000
chr19	22650000	22660000
chr19	22740000	22750000
chr19	22860000	22870000
chr19	23150000	23170000
chr19	23350000	23360000
chr19	23490000	23500000
chr19	23540000	23550000
chr19	23560000	23570000
chr19	23610000	23630000
chr19	23670000	23690000
chr19	23710000	23720000
chr19	23820000	23830000
chr19	23840000	23850000
chr19	23970000	23990000
chr19	24070000	24080000
chr19	24110000	24120000
chr19	24130000	24140000
chr19	24160000	24180000
chr19	24300000	24330000
chr19	24370000	24380000
chr19	24390000	24410000
chr19	24430000	24440000
chr19	24450000	24460000
chr19	24470000	24490000
chr19	24510000	24520000
chr19	27870000	27900000
chr19	27920000	27950000
chr19	27960000	27990000
chr19	28010000	28080000
chr19	28100000	28180000
chr19	28190000	28260000
chr19	28270000	28290000
chr19	28310000	28330000
chr19	28360000	28370000
chr19	28420000	28430000
chr19	28450000	28460000
chr19	28470000	28490000
chr19	28520000	28530000
chr19	28560000	28680000
chr19	28690000	28710000
chr19	28720000	28740000
chr19	28760000	28780000
chr19	28830000	28840000
chr19	28900000	28910000
chr19	28950000	28970000
chr19	29000000	29030000
chr19	29040000	29060000
chr19	29100000	29110000
chr19	29150000	29160000
chr19	29260000	29280000
chr19	29290000	29300000
chr19	29410000	29420000
chr19	29440000	29460000
chr19	29630000	29640000
chr19	29650000	29670000
chr19	29680000	29700000
chr19	29830000	29840000
chr19	29850000	29860000
chr19	29950000	29960000
chr19	30430000	30440000
chr19	30460000	30530000
chr19	30760000	30770000
chr19	30830000	30840000
chr19	30880000	30930000
chr19	31410000	31440000
chr19	31450000	31490000
chr19	31510000	31530000
chr19	31640000	31650000
chr19	31670000	31690000
chr19	31710000	31730000
chr19	32010000	32020000
chr19	32070000	32080000
chr19	32170000	32180000
chr19	32190000	32200000
chr19	32220000	32260000
chr19	32270000	32290000
chr19	32300000	32310000
chr19	32320000	32380000
chr19	32390000	32430000
chr19	32480000	32490000
chr19	32640000	32650000
chr19	32950000	32970000
chr19	32980000	32990000
chr19	33240000	33250000
chr19	33290000	33300000
chr19	33800000	33820000
chr19	33830000	33850000
chr19	33860000	33880000
chr19	34050000	34070000
chr19	34080000	34090000
chr19	34140000	34150000
chr19	34320000	34330000
chr19	34340000	34350000
chr19	34400000	34420000
chr19	34450000	34520000
chr19	34710000	34720000
chr19	34790000	34800000
chr19	35070000	35080000
chr19	35120000	35130000
chr19	35170000	35180000
chr19	35730000	35740000
chr19	35860000	35880000
chr19	35900000	35910000
chr19	35950000	35960000
chr19	37040000	37050000
chr19	37100000	37110000
chr19	37190000	37210000
chr19	37220000	37230000
chr19	37360000	37370000
chr19	37380000	37390000
chr19	37470000	37480000
chr19	37520000	37540000
chr19	37550000	37570000
chr19	37580000	37590000
chr19	37920000	37930000
chr19	37940000	37950000
chr19	38050000	38060000
chr19	38070000	38080000
chr19	38090000	38100000
chr19	38260000	38270000
chr19	38430000	38450000
chr19	38460000	38480000
chr19	38490000	38530000
chr19	38550000	38580000
chr19	39140000	39150000
chr19	39180000	39190000
chr19	39720000	39730000
chr19	40050000	40070000
chr19	40080000	40100000
chr19	40110000	40120000
chr19	40160000	40170000
chr19	40440000	40450000
chr19	40470000	40480000
chr19	40490000	40500000
chr19	40510000	40540000
chr19	40550000	40590000
chr19	40630000	40640000
chr19	41430000	41450000
chr19	41460000	41470000
chr19	41480000	41520000
chr19	41560000	41590000
chr19	41610000	41620000
chr19	41990000	42000000
chr19	42040000	42050000
chr19	42060000	42070000
chr19	42240000	42250000
chr19	42960000	42970000
chr19	43810000	43830000
chr19	43900000	43910000
chr19	44360000	44370000
chr19	44410000	44440000
chr19	44450000	44470000
chr19	44510000	44520000
chr19	44540000	44560000
chr19	44570000	44580000
chr19	44590000	44600000
chr19	44690000	44700000
chr19	44730000	44770000
chr19	44790000	44880000
chr19	45090000	45100000
chr19	45220000	45230000
chr19	46030000	46040000
chr19	46550000	46790000
chr19	46860000	46870000
chr19	46890000	46910000
chr19	46920000	46960000
chr19	46980000	46990000
chr19	47040000	47050000
chr19	47160000	47170000
chr19	47330000	47360000
chr19	47370000	47430000
chr19	47440000	47490000
chr19	47510000	47520000
chr19	47650000	47660000
chr19	48080000	48100000
chr19	48130000	48140000
chr19	48480000	48490000
chr19	48510000	48520000
chr19	48580000	48590000
chr19	48650000	48660000
chr19	49680000	49690000
chr19	49730000	49740000
chr19	49750000	49780000
chr19	49790000	49830000
chr19	51970000	51980000
chr19	52280000	52290000
chr19	52530000	52540000
chr19	52610000	52630000
chr19	52640000	52650000
chr19	55800000	55810000
chr19	56760000	56770000
chr19	56930000	56940000
chr19	57020000	57030000
chr19	57060000	57080000
chr19	57290000	57300000
chr19	57320000	57330000
chr19	57350000	57370000
chr19	57800000	57810000
chr19	58020000	58030000
chr19	58050000	58060000
chr19	58070000	58080000
chr19	58100000	58110000
chr19	58120000	58170000
chr19	58180000	58190000
chr19	58200000	58210000
chr19	58220000	58230000
chr19	58240000	58250000
chr19	58260000	58270000
chr19	58810000	58820000
chr20	160000	530000
chr20	540000	550000
chr20	560000	640000
chr20	660000	740000
chr20	760000	820000
chr20	830000	970000
chr20	1000000	1020000
chr20	1030000	1160000
chr20	1170000	1200000
chr20	1210000	1280000
chr20	1290000	1450000
chr20	1460000	1570000
chr20	1590000	1710000
chr20	1720000	1750000
chr20	1770000	1800000
chr20	1830000	1840000
chr20	1860000	1880000
chr20	1890000	2120000
[truncated: 785 more rows]

## Sheet: S010
Supplementary Table S6: FIREs called by FIREcaller from HiC libraries
Chr	Start	End
chr1	1730000	1740000
chr1	1770000	1780000
chr1	8100000	8110000
chr1	8150000	8180000
chr1	8190000	8200000
chr1	8600000	8640000
chr1	8650000	8660000
chr1	8680000	8690000
chr1	8710000	8720000
chr1	8730000	8750000
chr1	9350000	9360000
chr1	12460000	12470000
chr1	12500000	12540000
chr1	19780000	19790000
chr1	19810000	19820000
chr1	19830000	19840000
chr1	21300000	21310000
chr1	21320000	21330000
chr1	21370000	21390000
chr1	21410000	21420000
chr1	23420000	23430000
chr1	23870000	23880000
chr1	24710000	24720000
chr1	25150000	25160000
chr1	25360000	25370000
chr1	25420000	25430000
chr1	25940000	25960000
chr1	26040000	26050000
chr1	26930000	26980000
chr1	26990000	27080000
chr1	27090000	27120000
chr1	27490000	27500000
chr1	27740000	27760000
chr1	27780000	27790000
chr1	27810000	27830000
chr1	28410000	28420000
chr1	28450000	28460000
chr1	32390000	32400000
chr1	33470000	33480000
chr1	36650000	36660000
chr1	39650000	39660000
chr1	40720000	40730000
chr1	40800000	40810000
chr1	40870000	40880000
chr1	50320000	50330000
chr1	51940000	51950000
chr1	89590000	89600000
chr1	89640000	89670000
chr1	89690000	89700000
chr1	89720000	89730000
chr1	108500000	108510000
chr1	108520000	108530000
chr1	110260000	110280000
chr1	111300000	111310000
chr1	112130000	112140000
chr1	112160000	112170000
chr1	112200000	112210000
chr1	113950000	113960000
chr1	114000000	114010000
chr1	119070000	119080000
chr1	120490000	120500000
chr1	120520000	120530000
chr1	145420000	145430000
chr1	145450000	145460000
chr1	146830000	146840000
chr1	146980000	146990000
chr1	149930000	149950000
chr1	149970000	149980000
chr1	150010000	150080000
chr1	150090000	150100000
chr1	150130000	150150000
chr1	150590000	150600000
chr1	150660000	150670000
chr1	150710000	150720000
chr1	150760000	150790000
chr1	151070000	151080000
chr1	152960000	152970000
chr1	154620000	154640000
chr1	154650000	154680000
chr1	154730000	154740000
chr1	155360000	155370000
chr1	155410000	155420000
chr1	155430000	155470000
chr1	155480000	155490000
chr1	155500000	155510000
chr1	155540000	155550000
chr1	155900000	155910000
chr1	156190000	156200000
chr1	156420000	156430000
chr1	158690000	158700000
chr1	159420000	159440000
chr1	159450000	159460000
chr1	159490000	159500000
chr1	159510000	159530000
chr1	159550000	159560000
chr1	159590000	159600000
chr1	160470000	160480000
chr1	160570000	160590000
chr1	160730000	160740000
chr1	160750000	160760000
chr1	160800000	160810000
chr1	172220000	172230000
chr1	184830000	184840000
chr1	203370000	203380000
chr1	206980000	206990000
chr1	207390000	207400000
chr1	224120000	224130000
chr1	234800000	234810000
chr1	234960000	234970000
chr1	234980000	235000000
chr2	12650000	12670000
chr2	12680000	12690000
chr2	24760000	24770000
chr2	24780000	24790000
chr2	24800000	24850000
chr2	24870000	24910000
chr2	25630000	25640000
chr2	25650000	25660000
chr2	25690000	25700000
chr2	25710000	25730000
chr2	25880000	25890000
chr2	26210000	26220000
chr2	26250000	26260000
chr2	26270000	26370000
chr2	27230000	27240000
chr2	27320000	27330000
chr2	27360000	27370000
chr2	27380000	27390000
chr2	28110000	28130000
chr2	28150000	28160000
chr2	28170000	28190000
chr2	28200000	28290000
chr2	28300000	28370000
chr2	28380000	28390000
chr2	28420000	28450000
chr2	28490000	28500000
chr2	37690000	37700000
chr2	37760000	37800000
chr2	37810000	37820000
chr2	37830000	37910000
chr2	37930000	37940000
chr2	37950000	37970000
chr2	38290000	38300000
chr2	38340000	38350000
chr2	38400000	38410000
chr2	38810000	38820000
chr2	39280000	39290000
chr2	43520000	43540000
chr2	43550000	43560000
chr2	43570000	43620000
chr2	43630000	43640000
chr2	43650000	43660000
chr2	43680000	43690000
chr2	47390000	47410000
chr2	52760000	52770000
chr2	64440000	64450000
chr2	64870000	64880000
chr2	64940000	64980000
chr2	64990000	65000000
chr2	68970000	68990000
chr2	69060000	69070000
chr2	69130000	69140000
chr2	69360000	69380000
chr2	69830000	69840000
chr2	69960000	69970000
chr2	70210000	70220000
chr2	70240000	70320000
chr2	84820000	84830000
chr2	84940000	84950000
chr2	85660000	85670000
chr2	85710000	85720000
chr2	85760000	85790000
chr2	86110000	86160000
chr2	86220000	86230000
chr2	90110000	90120000
chr2	97080000	97090000
chr2	97130000	97140000
chr2	98540000	98550000
chr2	99270000	99280000
chr2	99290000	99300000
chr2	99310000	99320000
chr2	99340000	99350000
chr2	102780000	102790000
chr2	111670000	111680000
chr2	112380000	112400000
chr2	113500000	113510000
chr2	182170000	182180000
chr2	197030000	197040000
chr2	198050000	198070000
chr2	198080000	198090000
chr2	198150000	198180000
chr2	201840000	201850000
chr2	201880000	201890000
chr2	201900000	201960000
chr2	202140000	202150000
chr2	204550000	204560000
chr2	204570000	204580000
chr2	209610000	209620000
chr2	219160000	219170000
chr2	219210000	219220000
chr2	219330000	219340000
chr2	219590000	219600000
chr2	219650000	219660000
chr2	219980000	219990000
chr2	231190000	231240000
chr2	231250000	231270000
chr2	231290000	231310000
chr2	231320000	231370000
chr2	231980000	231990000
chr2	232160000	232170000
chr2	232930000	232970000
chr2	233000000	233020000
chr2	233040000	233050000
chr2	233990000	234010000
chr2	235150000	235160000
chr2	235190000	235220000
chr2	235240000	235250000
chr2	235270000	235280000
chr2	235310000	235320000
chr2	235330000	235350000
chr2	237650000	237660000
chr2	237800000	237810000
chr2	238110000	238140000
chr2	238160000	238200000
chr2	238220000	238240000
chr2	238270000	238280000
chr2	238310000	238320000
chr2	238580000	238590000
chr2	238630000	238640000
chr2	238650000	238660000
chr2	240170000	240180000
chr2	240460000	240470000
chr2	240540000	240550000
chr2	241210000	241220000
chr2	241600000	241610000
chr2	241980000	241990000
chr2	242100000	242110000
chr2	242200000	242240000
chr2	242250000	242390000
chr2	242410000	242420000
chr2	242450000	242460000
chr2	242690000	242700000
chr2	242720000	242730000
chr2	242770000	242780000
chr2	242890000	242910000
chr3	4860000	4980000
chr3	5010000	5020000
chr3	12300000	12310000
chr3	12320000	12340000
chr3	12350000	12370000
chr3	12390000	12430000
chr3	15300000	15310000
chr3	15420000	15440000
chr3	16990000	17000000
chr3	30470000	30500000
chr3	30510000	30520000
chr3	30530000	30550000
chr3	30560000	30570000
chr3	30590000	30600000
chr3	40840000	40850000
chr3	43340000	43350000
chr3	45690000	45710000
chr3	46010000	46020000
chr3	46100000	46120000
chr3	46130000	46380000
chr3	46390000	46420000
chr3	46530000	46540000
chr3	46550000	46560000
chr3	46800000	46820000
chr3	47000000	47010000
chr3	47060000	47070000
chr3	47120000	47130000
chr3	47140000	47180000
chr3	47190000	47200000
chr3	47290000	47300000
chr3	47660000	47760000
chr3	47770000	47790000
chr3	47930000	47940000
chr3	47970000	47980000
chr3	48000000	48010000
chr3	48020000	48040000
chr3	48060000	48100000
chr3	48290000	48300000
chr3	48310000	48330000
chr3	48360000	48450000
chr3	48470000	48490000
chr3	48500000	48530000
chr3	48540000	48550000
chr3	48560000	48570000
chr3	48580000	48590000
chr3	48780000	48790000
chr3	48800000	48850000
chr3	48860000	48870000
chr3	48880000	48890000
chr3	48950000	48970000
chr3	49240000	49260000
chr3	49270000	49290000
chr3	49300000	49420000
chr3	49440000	49450000
chr3	49460000	49470000
chr3	49480000	49490000
chr3	49600000	49620000
chr3	49810000	49820000
chr3	49870000	49880000
chr3	50230000	50240000
chr3	50260000	50270000
chr3	50800000	50810000
chr3	50840000	50850000
chr3	50890000	50910000
chr3	50960000	50970000
chr3	51050000	51070000
chr3	51080000	51090000
chr3	51100000	51120000
chr3	51190000	51220000
chr3	52150000	52160000
chr3	52300000	52320000
chr3	52370000	52380000
chr3	52690000	52700000
chr3	52950000	52970000
chr3	56830000	56840000
chr3	83850000	83860000
chr3	101720000	101760000
chr3	112520000	112540000
chr3	121650000	121660000
chr3	121760000	121770000
chr3	125000000	125010000
chr3	128500000	128520000
chr3	128960000	128970000
chr3	141170000	141180000
chr3	151870000	151880000
chr3	151890000	151900000
chr3	151910000	152110000
chr3	171820000	171830000
chr3	172260000	172270000
chr3	177050000	177060000
chr3	177160000	177170000
chr3	177310000	177320000
chr3	177360000	177370000
chr3	177750000	177760000
chr3	182970000	182980000
chr3	184420000	184450000
chr3	186590000	186600000
chr3	187580000	187600000
chr3	187630000	187640000
chr3	187650000	187660000
chr3	187670000	187690000
chr3	187700000	187710000
chr3	187730000	187740000
chr3	188040000	188050000
chr3	188150000	188160000
chr3	188220000	188230000
chr3	189380000	189390000
chr3	191580000	191590000
chr3	194190000	194200000
chr3	194500000	194510000
chr3	194540000	194550000
chr3	194610000	194660000
chr3	194740000	194750000
chr3	195050000	195150000
chr3	195160000	195170000
chr3	195520000	195530000
chr3	195790000	195810000
chr3	195840000	195860000
chr3	195880000	195890000
chr3	195900000	195930000
chr3	195980000	195990000
chr3	196010000	196020000
chr3	196030000	196160000
chr3	196170000	196180000
chr3	196190000	196210000
chr3	196320000	196380000
chr3	196390000	196420000
chr3	196440000	196450000
chr3	196460000	196540000
chr3	196550000	196560000
chr3	196570000	196580000
chr3	196600000	196610000
chr3	196780000	196930000
chr3	196960000	196970000
chr3	196980000	197010000
chr3	197020000	197190000
chr3	197450000	197460000
chr3	197470000	197490000
chr3	197510000	197570000
chr3	197600000	197610000
chr3	197630000	197650000
chr3	197710000	197720000
chr3	197750000	197770000
chr3	197780000	197800000
chr4	140000	160000
chr4	170000	300000
chr4	310000	340000
chr4	350000	480000
chr4	830000	850000
chr4	920000	940000
chr4	1120000	1140000
chr4	1150000	1190000
chr4	1240000	1290000
chr4	1900000	1910000
chr4	2310000	2330000
chr4	2380000	2390000
chr4	2410000	2420000
chr4	2430000	2440000
chr4	2500000	2510000
chr4	2550000	2560000
chr4	2770000	2780000
chr4	2820000	2830000
chr4	2840000	2920000
chr4	3140000	3150000
chr4	3340000	3360000
chr4	3400000	3410000
chr4	5490000	5500000
chr4	6750000	6760000
chr4	6800000	6950000
chr4	6980000	6990000
chr4	26070000	26080000
chr4	26090000	26110000
chr4	26140000	26170000
chr4	26180000	26270000
chr4	26290000	26310000
chr4	36290000	36300000
chr4	38380000	38390000
chr4	38430000	38440000
chr4	38450000	38460000
chr4	38470000	38480000
chr4	38490000	38540000
chr4	38570000	38580000
chr4	38610000	38620000
chr4	39000000	39020000
chr4	39070000	39090000
chr4	39830000	39840000
chr4	39850000	39860000
chr4	39870000	39880000
chr4	39900000	39910000
chr4	40150000	40160000
chr4	40210000	40230000
chr4	40240000	40250000
chr4	40300000	40310000
chr4	40520000	40530000
chr4	40590000	40610000
chr4	40630000	40640000
chr4	48730000	48740000
chr4	52870000	52880000
chr4	80890000	80900000
chr4	80950000	80960000
chr4	84100000	84110000
chr4	153420000	153430000
chr4	153560000	153570000
chr4	185250000	185270000
chr4	185280000	185420000
chr4	185430000	185440000
chr4	185450000	185460000
chr4	185710000	185720000
chr4	185770000	185780000
chr4	190580000	190600000
chr4	190610000	190640000
chr4	190650000	190660000
chr5	320000	340000
chr5	560000	570000
chr5	970000	990000
chr5	1530000	1540000
chr5	33120000	33130000
chr5	36300000	36310000
chr5	36500000	36510000
chr5	36600000	36610000
chr5	39140000	39150000
chr5	39170000	39200000
chr5	39210000	39240000
chr5	39270000	39290000
chr5	39380000	39390000
chr5	39420000	39430000
chr5	40190000	40210000
chr5	40300000	40310000
chr5	40370000	40400000
chr5	40410000	40420000
chr5	40430000	40440000
chr5	40460000	40470000
chr5	40480000	40510000
chr5	40520000	40530000
chr5	40560000	40580000
chr5	40600000	40610000
chr5	40640000	40650000
chr5	42990000	43000000
chr5	46030000	46040000
chr5	46100000	46110000
chr5	49800000	49820000
chr5	49860000	49880000
chr5	53890000	54040000
chr5	54820000	54830000
chr5	55910000	55920000
chr5	67360000	67370000
chr5	133740000	133750000
chr5	142680000	142690000
chr5	169650000	169660000
chr5	169690000	169700000
chr5	172190000	172210000
chr5	172220000	172250000
chr5	172260000	172270000
chr5	172330000	172340000
chr5	173250000	173260000
chr5	176580000	176600000
chr5	176610000	176710000
chr5	176740000	176760000
chr5	176770000	176780000
chr5	176810000	176860000
chr5	176880000	176890000
chr5	177820000	177840000
chr5	177870000	177890000
chr5	178330000	178350000
chr5	178380000	178390000
chr5	179120000	179140000
chr5	179170000	179190000
chr5	179200000	179210000
chr5	179230000	179240000
chr5	179280000	179290000
chr5	179330000	179340000
chr5	179380000	179390000
chr5	179410000	179420000
chr5	179430000	179440000
chr5	180130000	180140000
chr5	180290000	180310000
chr5	180330000	180400000
chr5	180450000	180460000
chr5	180500000	180510000
chr6	270000	280000
chr6	290000	300000
chr6	310000	320000
chr6	380000	390000
chr6	400000	410000
chr6	950000	960000
chr6	980000	990000
chr6	1090000	1100000
chr6	1870000	1880000
chr6	1950000	1960000
chr6	2840000	2860000
chr6	2900000	2940000
chr6	3000000	3010000
chr6	3050000	3060000
chr6	3550000	3560000
chr6	6400000	6410000
chr6	11260000	11270000
chr6	11280000	11300000
chr6	11310000	11320000
chr6	11350000	11370000
chr6	11390000	11400000
chr6	11410000	11430000
chr6	13660000	13670000
chr6	15930000	15940000
chr6	16610000	16630000
chr6	16660000	16670000
chr6	16680000	16690000
chr6	24860000	24870000
chr6	24880000	24890000
chr6	24930000	24940000
chr6	24950000	24960000
chr6	24990000	25000000
chr6	25010000	25020000
chr6	25450000	25470000
chr6	26060000	26070000
chr6	26100000	26110000
chr6	26120000	26130000
chr6	26150000	26160000
chr6	26170000	26220000
chr6	26230000	26240000
chr6	26270000	26280000
chr6	26360000	26370000
chr6	26400000	26410000
chr6	26420000	26430000
chr6	26440000	26450000
chr6	26470000	26480000
chr6	28190000	28200000
chr6	28220000	28230000
chr6	29370000	29390000
chr6	29800000	29850000
chr6	29900000	29910000
chr6	30200000	30210000
chr6	30240000	30250000
chr6	30440000	30480000
chr6	30500000	30530000
chr6	30610000	30620000
chr6	30640000	30660000
chr6	30680000	30710000
chr6	30730000	30740000
chr6	30760000	30770000
chr6	30780000	30810000
chr6	30820000	30850000
chr6	30920000	30990000
chr6	31020000	31030000
chr6	31160000	31220000
chr6	31240000	31340000
chr6	31360000	31370000
chr6	31390000	31410000
chr6	31500000	31530000
chr6	31550000	31580000
chr6	31610000	31620000
chr6	31630000	31640000
chr6	31650000	31810000
chr6	31820000	31840000
chr6	32260000	32280000
chr6	32300000	32310000
chr6	32410000	32450000
chr6	32480000	32630000
chr6	32650000	32670000
chr6	32700000	32720000
chr6	32800000	32810000
chr6	32850000	33130000
chr6	33210000	33220000
chr6	33290000	33300000
chr6	33310000	33320000
chr6	33850000	33860000
chr6	33890000	33920000
chr6	33930000	33950000
chr6	34210000	34370000
chr6	34720000	34730000
chr6	34890000	34910000
chr6	34920000	34930000
chr6	34940000	35010000
chr6	35080000	35090000
chr6	35290000	35300000
chr6	35310000	35320000
chr6	35390000	35410000
chr6	35550000	35660000
chr6	35690000	35710000
chr6	35980000	36000000
chr6	36010000	36090000
chr6	36130000	36180000
chr6	36440000	36450000
chr6	36460000	36510000
chr6	36520000	36530000
chr6	36560000	36580000
chr6	36590000	36600000
chr6	36640000	36650000
chr6	36690000	36700000
chr6	36850000	36860000
chr6	36980000	37080000
chr6	37100000	37120000
chr6	37130000	37160000
chr6	37170000	37180000
chr6	37790000	37800000
chr6	37870000	37880000
chr6	37900000	37910000
chr6	39560000	39580000
chr6	39640000	39650000
chr6	41840000	41850000
chr6	41860000	41870000
chr6	41880000	41890000
chr6	41950000	41960000
chr6	41980000	41990000
chr6	42250000	42260000
chr6	42280000	42430000
chr6	42450000	42460000
chr6	42620000	42660000
chr6	42680000	42700000
chr6	42710000	42720000
chr6	42730000	42740000
chr6	42750000	42760000
chr6	42770000	42800000
chr6	42820000	42840000
chr6	42940000	42950000
chr6	43300000	43310000
chr6	43350000	43360000
chr6	43860000	43870000
chr6	43910000	43930000
chr6	44910000	44920000
chr6	44960000	44980000
chr6	45030000	45050000
chr6	45070000	45080000
chr6	45400000	45410000
chr6	45500000	45520000
chr6	46260000	46270000
chr6	48370000	48380000
chr6	48970000	48980000
chr6	49000000	49010000
chr6	49070000	49080000
chr6	55530000	55540000
chr6	55960000	55970000
chr6	56070000	56080000
chr6	56330000	56340000
chr6	56350000	56360000
chr6	56560000	56570000
chr6	62720000	62730000
chr6	62770000	62780000
chr6	63190000	63200000
chr6	66390000	66400000
chr6	108930000	108940000
chr6	112140000	112150000
chr6	112190000	112200000
chr6	112210000	112220000
chr6	120960000	120970000
chr6	136960000	136970000
chr6	137590000	137600000
chr6	137630000	137640000
chr6	138120000	138140000
chr6	138160000	138170000
chr6	138180000	138200000
chr6	144600000	144610000
chr6	149420000	149430000
chr6	149510000	149560000
chr6	149570000	149610000
chr6	149630000	149680000
chr6	169470000	169480000
chr7	2600000	2610000
chr7	5600000	5620000
chr7	5700000	5720000
chr7	6260000	6270000
chr7	6290000	6300000
chr7	7880000	7890000
chr7	30360000	30370000
chr7	30390000	30400000
chr7	36760000	36770000
chr7	36820000	36830000
chr7	37390000	37400000
chr7	37670000	37680000
chr7	37740000	37750000
chr7	38250000	38260000
chr7	39060000	39070000
chr7	50360000	50370000
chr7	75260000	75270000
chr7	99790000	99810000
chr7	100130000	100160000
chr7	130830000	130840000
chr7	130850000	130860000
chr7	130870000	130880000
chr7	130890000	130900000
chr7	130910000	130920000
chr7	150210000	150230000
chr7	150250000	150270000
chr7	150280000	150290000
chr7	150310000	150340000
chr7	150360000	150370000
chr7	150390000	150400000
chr8	8700000	8710000
chr8	19330000	19340000
chr8	19360000	19380000
chr8	19390000	19530000
chr8	19540000	19560000
chr8	22280000	22290000
chr8	22310000	22340000
chr8	22350000	22360000
chr8	22390000	22400000
chr8	22610000	22620000
chr8	23100000	23110000
chr8	24110000	24120000
chr8	28760000	28780000
chr8	28800000	28850000
chr8	28860000	28880000
chr8	28890000	28900000
chr8	29300000	29340000
chr8	29360000	29370000
chr8	29380000	29420000
chr8	29460000	29480000
chr8	38190000	38200000
chr8	39260000	39280000
chr8	39310000	39320000
chr8	39330000	39340000
chr8	41850000	41860000
chr8	42150000	42160000
chr8	43350000	43360000
chr8	43460000	43500000
chr8	43510000	43520000
chr8	43530000	43540000
chr8	43580000	43630000
chr8	43640000	43670000
chr8	43690000	43720000
chr8	48340000	48360000
chr8	48400000	48410000
chr8	48420000	48450000
chr8	48480000	48520000
chr8	48540000	48550000
chr8	66740000	66750000
chr8	96160000	96170000
chr8	97820000	97830000
chr8	97840000	97850000
chr8	97860000	97870000
chr8	100480000	100490000
chr8	101330000	101350000
chr8	115640000	115650000
chr8	120560000	120570000
chr8	123910000	123920000
chr8	125120000	125150000
chr8	125170000	125190000
chr8	125220000	125250000
chr8	125260000	125270000
chr8	125310000	125350000
chr8	125760000	125780000
chr8	125820000	125830000
chr8	126280000	126290000
chr8	131310000	131340000
chr8	134040000	134050000
chr8	134060000	134090000
chr8	141900000	141920000
chr8	141940000	141960000
chr8	141970000	142000000
chr8	142090000	142100000
chr8	142210000	142220000
chr8	142250000	142260000
chr8	142270000	142280000
chr8	143460000	143470000
chr8	143900000	143910000
chr8	143920000	143930000
chr8	143940000	144010000
chr8	144020000	144040000
chr8	144060000	144070000
chr8	144080000	144090000
chr8	144250000	144260000
chr8	144540000	144550000
chr8	144710000	144740000
chr8	144760000	144770000
chr8	144830000	144840000
chr8	144920000	144940000
chr8	144970000	144990000
chr8	145050000	145060000
chr8	145070000	145080000
chr8	145130000	145150000
chr8	145700000	145710000
chr8	145780000	145800000
chr8	145810000	145840000
chr8	145850000	145880000
chr8	145890000	145900000
chr8	145910000	145950000
chr8	145960000	145980000
chr8	145990000	146000000
chr8	146020000	146060000
chr8	146070000	146180000
chr8	146190000	146230000
chr9	210000	220000
chr9	260000	280000
chr9	300000	320000
chr9	410000	420000
chr9	4900000	4910000
chr9	35300000	35310000
chr9	35880000	35890000
chr9	36100000	36120000
chr9	37140000	37150000
chr9	37220000	37230000
chr9	125350000	125360000
chr9	126570000	126580000
chr9	126600000	126610000
chr9	127770000	127780000
chr9	128610000	128620000
chr9	129830000	129840000
chr9	132050000	132070000
chr9	132110000	132120000
chr9	132130000	132150000
chr9	132170000	132190000
chr9	132200000	132210000
chr9	132220000	132230000
chr9	132650000	132670000
chr9	132680000	132690000
chr9	132700000	132790000
chr9	132800000	132820000
chr9	134050000	134060000
chr9	134530000	134540000
chr9	134880000	134890000
chr9	139380000	139390000
chr9	139520000	139530000
chr9	140020000	140030000
chr10	3650000	3670000
chr10	3910000	3920000
chr10	3930000	3940000
chr10	3990000	4000000
chr10	4010000	4080000
chr10	4090000	4110000
chr10	4140000	4150000
chr10	4170000	4180000
chr10	4410000	4420000
chr10	4530000	4540000
chr10	4570000	4590000
chr10	6240000	6250000
chr10	7280000	7290000
chr10	12560000	12570000
chr10	17040000	17050000
chr10	17060000	17070000
chr10	17080000	17150000
chr10	20330000	20340000
chr10	26780000	26790000
chr10	30700000	30710000
chr10	30780000	30800000
chr10	30810000	30830000
chr10	31190000	31210000
chr10	31260000	31270000
chr10	31510000	31520000
chr10	31630000	31640000
chr10	31670000	31690000
chr10	31740000	31750000
chr10	31780000	31790000
chr10	31850000	31860000
chr10	31910000	31920000
chr10	33160000	33170000
chr10	46030000	46040000
chr10	63800000	63820000
chr10	70850000	70860000
chr10	71980000	71990000
chr10	72030000	72040000
chr10	72120000	72130000
chr10	72370000	72390000
chr10	72410000	72420000
chr10	73900000	73910000
chr10	73970000	73990000
chr10	74030000	74040000
chr10	74240000	74250000
chr10	74270000	74300000
chr10	74320000	74330000
chr10	74400000	74410000
chr10	74520000	74530000
chr10	75290000	75310000
chr10	75330000	75340000
chr10	75640000	75650000
chr10	75660000	75670000
chr10	75690000	75720000
chr10	75760000	75800000
chr10	75810000	75820000
chr10	75830000	75840000
chr10	76210000	76220000
chr10	76250000	76260000
chr10	76300000	76330000
chr10	76400000	76410000
chr10	89720000	89750000
chr10	90590000	90600000
chr10	102190000	102200000
chr10	103130000	103150000
chr10	103640000	103660000
chr10	103690000	103700000
chr10	103710000	103720000
chr10	103730000	103740000
chr10	104010000	104050000
chr10	104080000	104120000
chr10	104340000	104350000
chr10	104860000	104880000
chr10	104900000	104920000
chr10	105750000	105760000
chr10	117340000	117350000
chr10	124330000	124350000
chr10	135290000	135310000
chr11	300000	310000
chr11	330000	350000
chr11	440000	450000
chr11	570000	580000
chr11	630000	640000
chr11	650000	700000
chr11	710000	730000
chr11	740000	750000
chr11	1810000	1820000
chr11	1830000	1860000
chr11	1900000	1910000
chr11	2370000	2380000
chr11	2630000	2640000
chr11	2660000	2670000
chr11	3360000	3370000
chr11	3880000	3890000
chr11	3900000	3920000
chr11	3930000	4000000
chr11	4010000	4020000
chr11	4040000	4050000
chr11	4060000	4070000
chr11	4950000	4970000
chr11	6140000	6150000
chr11	10070000	10080000
chr11	10440000	10450000
chr11	10530000	10570000
chr11	10580000	10610000
chr11	10630000	10640000
chr11	12250000	12260000
chr11	14670000	14680000
chr11	14720000	14730000
chr11	14810000	14820000
chr11	35040000	35070000
chr11	35080000	35110000
chr11	35150000	35240000
chr11	35250000	35270000
chr11	46970000	46980000
chr11	47000000	47010000
chr11	47080000	47090000
chr11	55360000	55370000
chr11	55460000	55470000
chr11	60190000	60200000
chr11	60240000	60250000
chr11	60300000	60320000
chr11	61660000	61670000
chr11	61700000	61720000
chr11	61770000	61780000
chr11	61840000	61850000
chr11	62190000	62200000
chr11	62550000	62560000
chr11	63080000	63090000
chr11	63110000	63120000
chr11	63130000	63140000
chr11	63400000	63410000
chr11	63600000	63610000
chr11	64610000	64620000
chr11	64740000	64750000
chr11	65040000	65050000
chr11	65080000	65090000
chr11	65130000	65160000
chr11	65170000	65290000
chr11	65470000	65480000
chr11	65490000	65540000
chr11	65580000	65630000
chr11	65650000	65660000
chr11	65670000	65680000
chr11	65690000	65710000
chr11	65720000	65730000
chr11	65830000	65850000
chr11	65880000	65940000
chr11	65950000	65960000
chr11	65970000	65980000
chr11	66350000	66360000
chr11	66380000	66450000
chr11	66910000	66920000
chr11	66930000	66960000
chr11	67030000	67040000
chr11	67080000	67100000
chr11	67120000	67130000
chr11	68060000	68070000
chr11	71730000	71740000
chr11	71850000	71860000
chr11	72630000	72770000
chr11	72780000	72840000
chr11	73150000	73170000
chr11	73180000	73200000
chr11	73210000	73260000
chr11	73780000	73810000
chr11	74010000	74020000
chr11	74090000	74100000
chr11	74110000	74120000
chr11	74850000	74860000
chr11	75670000	75680000
chr11	75730000	75750000
chr11	75780000	75790000
chr11	76620000	76630000
chr11	78050000	78060000
chr11	85740000	85760000
chr11	85770000	85790000
chr11	85800000	85810000
chr11	85820000	85880000
chr11	85900000	85910000
chr11	95240000	95250000
chr11	95940000	95960000
chr11	95970000	95980000
chr11	95990000	96000000
chr11	102360000	102370000
chr11	116760000	116770000
chr11	116780000	116860000
chr11	116870000	116890000
chr11	116900000	116920000
chr11	117810000	117830000
chr11	118070000	118090000
chr11	118120000	118140000
chr11	118150000	118180000
chr11	118200000	118210000
chr11	118220000	118230000
chr11	118630000	118640000
chr11	118650000	118680000
chr11	121280000	121290000
chr11	121320000	121330000
chr11	121370000	121380000
chr11	128280000	128290000
chr11	128310000	128320000
chr11	128340000	128360000
chr12	350000	360000
chr12	560000	570000
chr12	730000	810000
chr12	820000	940000
chr12	950000	960000
chr12	970000	980000
chr12	990000	1010000
chr12	1150000	1170000
chr12	1280000	1290000
chr12	1300000	1310000
chr12	1320000	1340000
chr12	1370000	1420000
chr12	1430000	1520000
chr12	1530000	1560000
chr12	1580000	1590000
chr12	1820000	1830000
chr12	1850000	1900000
chr12	2000000	2020000
chr12	2270000	2280000
chr12	2820000	2830000
chr12	4180000	4190000
chr12	4210000	4240000
chr12	4250000	4270000
chr12	4280000	4300000
chr12	4330000	4340000
chr12	4630000	4640000
chr12	6250000	6260000
chr12	6290000	6310000
chr12	6500000	6510000
chr12	6520000	6540000
chr12	6550000	6560000
chr12	6570000	6580000
chr12	6600000	6610000
chr12	6750000	6760000
chr12	6770000	6800000
chr12	6830000	6850000
chr12	6860000	6870000
chr12	6880000	6910000
chr12	7120000	7130000
chr12	7430000	7450000
chr12	7500000	7540000
chr12	7550000	7580000
chr12	7590000	7600000
chr12	7610000	7620000
chr12	7630000	7650000
chr12	7700000	7710000
chr12	7720000	7730000
chr12	8080000	8090000
chr12	8110000	8130000
chr12	8140000	8150000
chr12	9140000	9150000
chr12	9390000	9400000
chr12	9920000	9930000
chr12	9940000	9970000
chr12	10030000	10040000
chr12	10060000	10080000
chr12	10090000	10100000
chr12	10110000	10120000
chr12	10140000	10150000
chr12	10160000	10170000
chr12	10180000	10190000
chr12	10530000	10540000
chr12	10560000	10570000
chr12	10650000	10660000
chr12	11900000	11930000
chr12	11950000	11970000
chr12	11980000	12000000
chr12	12010000	12020000
chr12	12650000	12720000
chr12	17920000	17930000
chr12	26480000	26490000
chr12	27290000	27300000
chr12	32000000	32010000
chr12	49590000	49600000
chr12	49750000	49760000
chr12	49780000	49790000
chr12	49830000	49840000
chr12	49880000	49900000
chr12	50100000	50110000
chr12	50560000	50570000
chr12	50610000	50620000
chr12	50670000	50680000
chr12	50910000	50920000
chr12	50950000	51040000
chr12	51240000	51250000
chr12	51350000	51360000
chr12	51560000	51570000
chr12	52110000	52120000
chr12	53590000	53600000
chr12	53640000	53660000
chr12	53710000	53720000
chr12	53730000	53750000
chr12	53780000	53790000
chr12	53800000	53820000
chr12	55240000	55250000
chr12	56580000	56590000
chr12	56900000	56910000
chr12	56960000	56970000
chr12	68870000	68880000
chr12	89580000	89590000
chr12	89600000	89620000
chr12	89630000	89640000
chr12	89670000	89690000
chr12	90270000	90280000
chr12	104960000	104970000
chr12	109060000	109100000
chr12	109120000	109130000
chr12	109190000	109200000
chr12	110660000	110670000
chr12	111030000	111040000
chr12	121250000	121270000
chr12	121300000	121310000
chr12	121930000	121940000
chr12	121990000	122020000
chr12	122050000	122070000
chr12	122130000	122140000
chr12	122520000	122530000
chr12	125050000	125060000
chr13	45340000	45350000
chr13	46720000	46740000
chr13	46770000	46780000
chr13	48720000	48730000
chr13	48790000	48810000
chr13	48820000	48830000
chr13	48930000	48940000
chr13	48950000	48960000
chr13	48970000	48990000
chr13	49000000	49030000
chr13	49050000	49080000
chr13	49090000	49110000
chr13	49970000	49980000
chr13	50690000	50700000
chr13	50790000	50800000
chr13	50870000	50880000
chr13	51190000	51200000
chr13	51280000	51290000
chr13	52160000	52170000
chr13	77900000	77910000
chr13	99910000	99930000
chr13	99940000	99950000
chr13	99970000	99980000
chr13	100010000	100030000
chr13	100080000	100090000
chr13	114740000	114750000
chr13	114790000	114800000
chr13	114830000	114840000
chr13	114890000	114900000
chr13	114920000	114970000
chr13	114980000	114990000
chr14	20480000	20490000
chr14	20520000	20530000
chr14	20540000	20550000
chr14	21230000	21240000
chr14	21250000	21260000
chr14	21270000	21280000
chr14	21310000	21340000
chr14	21870000	21880000
chr14	22840000	22850000
chr14	22870000	22880000
chr14	22900000	22910000
chr14	22940000	22960000
chr14	23230000	23240000
chr14	23450000	23460000
chr14	23650000	23660000
chr14	24150000	24160000
chr14	24230000	24250000
chr14	24260000	24270000
chr14	50360000	50370000
chr14	50430000	50440000
chr14	50460000	50470000
chr14	50520000	50530000
chr14	68510000	68520000
chr14	68540000	68550000
chr14	68600000	68610000
chr14	68780000	68790000
chr14	68820000	68830000
chr14	68840000	68920000
chr14	68930000	68940000
chr14	68990000	69020000
chr14	69040000	69090000
chr14	69100000	69120000
chr14	69130000	69160000
chr14	71420000	71430000
chr14	71900000	71910000
chr14	71940000	71950000
chr14	72000000	72010000
chr14	72030000	72040000
chr14	73770000	73780000
chr14	73850000	73860000
chr14	75600000	75610000
chr14	75630000	75640000
chr14	75720000	75730000
chr14	75740000	75750000
chr14	75760000	75780000
chr14	75850000	75860000
chr14	92260000	92270000
chr14	101410000	101420000
chr14	101440000	101450000
chr14	102270000	102280000
chr14	102290000	102300000
chr14	102310000	102330000
chr14	103300000	103310000
chr14	103320000	103330000
chr14	103700000	103710000
chr14	106890000	106900000
chr14	106920000	106930000
chr14	106980000	106990000
chr15	44950000	44960000
chr15	50070000	50080000
chr15	64810000	64820000
chr15	66020000	66030000
chr15	66040000	66050000
chr15	77550000	77570000
chr15	77590000	77630000
chr15	77640000	77650000
chr15	78400000	78410000
chr15	90930000	90940000
chr15	90980000	91010000
chr15	91020000	91030000
chr15	93440000	93450000
chr15	100130000	100140000
chr16	250000	270000
chr16	3280000	3290000
chr16	3360000	3370000
chr16	3450000	3460000
chr16	33890000	33900000
chr16	34880000	34900000
chr16	35000000	35020000
chr16	35100000	35110000
chr16	35160000	35170000
chr16	70920000	70940000
chr16	71110000	71120000
chr16	71170000	71180000
chr16	84650000	84660000
chr16	89460000	89470000
chr16	89480000	89490000
chr16	89500000	89510000
chr17	460000	470000
chr17	2070000	2080000
chr17	3250000	3260000
chr17	10010000	10020000
chr17	10050000	10060000
chr17	21970000	21980000
chr17	22020000	22030000
chr17	22070000	22120000
chr17	33700000	33710000
chr17	57830000	57840000
chr17	57860000	57870000
chr17	57880000	57890000
chr17	81100000	81120000
chr18	360000	480000
chr18	490000	500000
chr18	510000	520000
chr18	1730000	1740000
chr18	2680000	2690000
chr18	2700000	2710000
chr18	2770000	2780000
chr18	2940000	2970000
chr18	2980000	2990000
chr18	3000000	3030000
chr18	3060000	3070000
chr18	3440000	3450000
chr18	3460000	3480000
chr18	4580000	4590000
chr18	9180000	9190000
chr18	9700000	9720000
chr18	9740000	9750000
chr18	9770000	9780000
chr18	11930000	11940000
chr18	12530000	12540000
chr18	12570000	12580000
chr18	12770000	12780000
chr18	12800000	12840000
chr18	12870000	12900000
chr18	18610000	18620000
chr18	20810000	20820000
chr18	20880000	20890000
chr18	33110000	33120000
chr18	46330000	46340000
chr18	46420000	46430000
chr18	46480000	46490000
chr18	60880000	60900000
chr18	60940000	60950000
chr18	60980000	60990000
chr18	77690000	77700000
chr19	1190000	1200000
chr19	2470000	2480000
chr19	28040000	28050000
chr19	28070000	28080000
chr19	28200000	28210000
chr19	46690000	46700000
chr20	390000	400000
chr20	460000	470000
chr20	930000	940000
chr20	1520000	1530000
chr20	1540000	1560000
chr20	1590000	1610000
chr20	2330000	2340000
chr20	3310000	3320000
chr20	3370000	3390000
chr20	3460000	3470000
chr20	3910000	3960000
chr20	3970000	3980000
chr20	3990000	4000000
chr20	4010000	4020000
chr20	4350000	4360000
chr20	8170000	8180000
chr20	34290000	34330000
chr20	46010000	46020000
chr20	47330000	47340000
chr20	47390000	47450000
chr20	47460000	47470000
chr20	48290000	48310000
chr20	48320000	48350000
chr20	48420000	48430000
chr20	48870000	48880000
chr20	48910000	48960000
chr20	48980000	49000000
chr20	52340000	52380000
chr20	52390000	52410000
chr20	52430000	52450000
chr20	52480000	52490000
chr20	62340000	62350000
chr20	62490000	62500000
chr21	10810000	10820000
chr21	10830000	10860000
chr21	15910000	15930000
chr21	16020000	16030000
chr21	47880000	47900000
chr21	47920000	47930000
chr21	47990000	48000000
chr22	18710000	18720000
chr22	36780000	36790000
chr22	40230000	40240000

## Sheet: S012
Supplementary Table S6: FIREs called by FIREcaller from HiC libraries
Chr	Start	End
chr1	1040000	1070000
chr1	1120000	1130000
chr1	1210000	1220000
chr1	1510000	1520000
chr1	1730000	1740000
chr1	1750000	1760000
chr1	1770000	1780000
chr1	8150000	8160000
chr1	8230000	8240000
chr1	8590000	8650000
chr1	8680000	8690000
chr1	8700000	8710000
chr1	8730000	8770000
chr1	12480000	12490000
chr1	12500000	12510000
chr1	16200000	16210000
chr1	21220000	21230000
chr1	21300000	21310000
chr1	21320000	21340000
chr1	21380000	21390000
chr1	21420000	21430000
chr1	25150000	25170000
chr1	25930000	25940000
chr1	25950000	25970000
chr1	26000000	26010000
chr1	26040000	26050000
chr1	26920000	26970000
chr1	27000000	27090000
chr1	27100000	27120000
chr1	27520000	27530000
chr1	27600000	27610000
chr1	27740000	27770000
chr1	27780000	27820000
chr1	28340000	28350000
chr1	28360000	28370000
chr1	28400000	28430000
chr1	29340000	29350000
chr1	39670000	39680000
chr1	40670000	40690000
chr1	40720000	40730000
chr1	45630000	45640000
chr1	89660000	89680000
chr1	89720000	89730000
chr1	111300000	111310000
chr1	111800000	111810000
chr1	112160000	112170000
chr1	114040000	114060000
chr1	146610000	146620000
chr1	149060000	149070000
chr1	149090000	149100000
chr1	149120000	149140000
chr1	149160000	149170000
chr1	150000000	150070000
chr1	150090000	150110000
chr1	150660000	150670000
chr1	150680000	150690000
chr1	150720000	150730000
chr1	150770000	150780000
chr1	152980000	152990000
chr1	154450000	154460000
chr1	154660000	154680000
chr1	155360000	155370000
chr1	155420000	155450000
chr1	155460000	155500000
chr1	158350000	158360000
chr1	158800000	158810000
chr1	158850000	158860000
chr1	159520000	159530000
chr1	160400000	160410000
chr1	160430000	160440000
chr1	160470000	160480000
chr1	160530000	160540000
chr1	160750000	160760000
chr1	160800000	160810000
chr1	172150000	172160000
chr1	172220000	172230000
chr1	172940000	172950000
chr1	173020000	173030000
chr1	198650000	198660000
chr1	248340000	248350000
chr2	11450000	11460000
chr2	12650000	12670000
chr2	24840000	24850000
chr2	24870000	24880000
chr2	25610000	25620000
chr2	25630000	25660000
chr2	25670000	25680000
chr2	25710000	25720000
chr2	25730000	25750000
chr2	25830000	25840000
chr2	26010000	26020000
chr2	26280000	26300000
chr2	26320000	26330000
chr2	26340000	26360000
chr2	26370000	26380000
chr2	27180000	27190000
chr2	27360000	27370000
chr2	27400000	27410000
chr2	27620000	27630000
chr2	28120000	28130000
chr2	28140000	28150000
chr2	28170000	28210000
chr2	28300000	28310000
chr2	28340000	28350000
chr2	28360000	28370000
chr2	37740000	37750000
chr2	37840000	37850000
chr2	43630000	43650000
chr2	61110000	61120000
chr2	61150000	61160000
chr2	64340000	64350000
chr2	64360000	64370000
chr2	64390000	64410000
chr2	64440000	64450000
chr2	64810000	64820000
chr2	64870000	64890000
chr2	64900000	64920000
chr2	64930000	65010000
chr2	65050000	65060000
chr2	68440000	68460000
chr2	68470000	68480000
chr2	68980000	68990000
chr2	69930000	69940000
chr2	70290000	70320000
chr2	86190000	86200000
chr2	89220000	89230000
chr2	97030000	97040000
chr2	98500000	98530000
chr2	98540000	98550000
chr2	98590000	98600000
chr2	98710000	98720000
chr2	111750000	111760000
chr2	111970000	111990000
chr2	146870000	146880000
chr2	201880000	201890000
chr2	201930000	201940000
chr2	231200000	231220000
chr2	231230000	231250000
chr2	231260000	231270000
chr2	231280000	231350000
chr2	232910000	232920000
chr2	232950000	232990000
chr2	233000000	233020000
chr2	233040000	233050000
chr2	233130000	233140000
chr2	235150000	235160000
chr2	235200000	235220000
chr2	235260000	235280000
chr2	237800000	237810000
chr2	238950000	238960000
chr2	239580000	239590000
chr2	240240000	240250000
chr2	240780000	240790000
chr2	241000000	241010000
chr2	241020000	241030000
chr2	241200000	241220000
chr2	241470000	241490000
chr2	241600000	241610000
chr2	241820000	241830000
chr2	241870000	241880000
chr2	241960000	241970000
chr2	241980000	242000000
chr2	242010000	242020000
chr2	242030000	242040000
chr2	242100000	242120000
chr2	242180000	242400000
chr2	242410000	242420000
chr2	242450000	242470000
chr2	242480000	242490000
chr2	242550000	242570000
chr2	242600000	242610000
chr2	242620000	242630000
chr2	242650000	242660000
chr2	242720000	242740000
chr2	242770000	242790000
chr2	242850000	242870000
chr2	242890000	242950000
chr2	242970000	242980000
chr3	4880000	4890000
chr3	46010000	46020000
chr3	46110000	46120000
chr3	46160000	46170000
chr3	46210000	46240000
chr3	46250000	46320000
chr3	46340000	46360000
chr3	46400000	46410000
chr3	46530000	46540000
chr3	46800000	46830000
chr3	46840000	46850000
chr3	47060000	47070000
chr3	47100000	47130000
chr3	47170000	47180000
chr3	47190000	47200000
chr3	47650000	47730000
chr3	47940000	47950000
chr3	47980000	47990000
chr3	48010000	48080000
chr3	48290000	48300000
chr3	48340000	48350000
chr3	48380000	48390000
chr3	48400000	48440000
chr3	48490000	48500000
chr3	48780000	48790000
chr3	48820000	48830000
chr3	48840000	48850000
chr3	48960000	48990000
chr3	49300000	49320000
chr3	49370000	49410000
chr3	49440000	49450000
chr3	49790000	49820000
chr3	49870000	49890000
chr3	50030000	50040000
chr3	50120000	50130000
chr3	50900000	50910000
chr3	50920000	50930000
chr3	51070000	51080000
chr3	51100000	51110000
chr3	51270000	51280000
chr3	52180000	52190000
chr3	52310000	52320000
chr3	52940000	52950000
chr3	78850000	78860000
chr3	78910000	78920000
chr3	151960000	151970000
chr3	151990000	152000000
chr3	194610000	194620000
chr3	194640000	194650000
chr3	195030000	195050000
chr3	195060000	195070000
chr3	195110000	195120000
chr3	195140000	195150000
chr3	195790000	195810000
chr3	195900000	195910000
chr3	196090000	196100000
chr3	196120000	196140000
chr3	196320000	196330000
chr3	196470000	196480000
chr3	196530000	196540000
chr3	196550000	196560000
chr3	196770000	196910000
chr3	196920000	196970000
chr3	196980000	196990000
chr3	197000000	197050000
chr3	197060000	197090000
chr3	197100000	197130000
chr3	197140000	197170000
chr3	197190000	197200000
chr3	197420000	197430000
chr3	197450000	197460000
chr3	197480000	197490000
chr3	197520000	197540000
chr3	197560000	197590000
chr3	197600000	197610000
chr3	197620000	197640000
chr3	197730000	197750000
chr3	197760000	197770000
chr4	110000	120000
chr4	130000	160000
chr4	170000	510000
chr4	530000	550000
chr4	570000	610000
chr4	750000	770000
chr4	800000	810000
chr4	830000	850000
chr4	910000	930000
chr4	1060000	1070000
chr4	1120000	1140000
chr4	1150000	1160000
chr4	1170000	1190000
chr4	1210000	1220000
chr4	1240000	1270000
chr4	1280000	1290000
chr4	1820000	1840000
chr4	1890000	1910000
chr4	1920000	1930000
chr4	1940000	1970000
chr4	2000000	2010000
chr4	2100000	2130000
chr4	2170000	2190000
chr4	2200000	2210000
chr4	2230000	2250000
chr4	2310000	2320000
chr4	2540000	2590000
chr4	2600000	2620000
chr4	2630000	2650000
chr4	2660000	2690000
chr4	2700000	2740000
chr4	2760000	2790000
chr4	2840000	2930000
chr4	3340000	3360000
chr4	3400000	3410000
chr4	6800000	6820000
chr4	6850000	6880000
chr4	6980000	6990000
chr4	39010000	39020000
chr4	39070000	39090000
chr4	39610000	39620000
chr4	39860000	39880000
chr4	40150000	40160000
chr4	40210000	40230000
chr4	48770000	48780000
chr4	185220000	185230000
chr4	185250000	185270000
chr4	185280000	185350000
chr4	185370000	185410000
chr4	185440000	185460000
chr4	190580000	190590000
chr4	190620000	190630000
chr5	320000	330000
chr5	340000	350000
chr5	380000	390000
chr5	400000	420000
chr5	450000	460000
chr5	590000	600000
chr5	1300000	1310000
chr5	1530000	1540000
chr5	8990000	9000000
chr5	14820000	14830000
chr5	19150000	19160000
chr5	33120000	33130000
chr5	40460000	40470000
chr5	40500000	40510000
chr5	40520000	40530000
chr5	49810000	49820000
chr5	49850000	49860000
chr5	53980000	53990000
chr5	132050000	132060000
chr5	133750000	133760000
chr5	138350000	138360000
chr5	138500000	138510000
chr5	175920000	175930000
chr5	176180000	176190000
chr5	176340000	176350000
chr5	176610000	176630000
chr5	176640000	176710000
chr5	176740000	176760000
chr5	176810000	176820000
chr5	176830000	176850000
chr5	177830000	177840000
chr5	177870000	177890000
chr5	178670000	178680000
chr5	179120000	179160000
chr5	179200000	179220000
chr5	179380000	179390000
chr5	179410000	179440000
chr5	179460000	179480000
chr5	179950000	179960000
chr5	180120000	180130000
chr5	180140000	180160000
chr5	180190000	180210000
chr5	180280000	180310000
chr5	180320000	180430000
chr5	180450000	180460000
chr5	180470000	180510000
chr5	180560000	180570000
chr6	260000	280000
chr6	290000	330000
chr6	370000	390000
chr6	400000	420000
chr6	450000	460000
chr6	490000	510000
chr6	530000	550000
chr6	640000	650000
chr6	660000	680000
chr6	950000	960000
chr6	970000	990000
chr6	1010000	1020000
chr6	1060000	1070000
chr6	1090000	1130000
chr6	1150000	1200000
chr6	1210000	1230000
chr6	1270000	1280000
chr6	1300000	1310000
chr6	1830000	1840000
chr6	1920000	1940000
chr6	1980000	1990000
chr6	2010000	2030000
chr6	2290000	2300000
chr6	2880000	2900000
chr6	2920000	2930000
chr6	2990000	3000000
chr6	3550000	3560000
chr6	11360000	11370000
chr6	11850000	11860000
chr6	11890000	11900000
chr6	16610000	16620000
chr6	24920000	24960000
chr6	24980000	25000000
chr6	25010000	25020000
chr6	25330000	25340000
chr6	25850000	25860000
chr6	26100000	26130000
chr6	26150000	26160000
chr6	26170000	26180000
chr6	26190000	26240000
chr6	26280000	26290000
chr6	26300000	26310000
chr6	26360000	26390000
chr6	26400000	26430000
chr6	26440000	26450000
chr6	26470000	26490000
chr6	29100000	29120000
chr6	29140000	29150000
chr6	29280000	29290000
chr6	29380000	29390000
chr6	29800000	29850000
chr6	29860000	29900000
chr6	29930000	29940000
chr6	29950000	29960000
chr6	29980000	29990000
chr6	30000000	30010000
chr6	30450000	30470000
chr6	30510000	30550000
chr6	30560000	30590000
chr6	30630000	30650000
chr6	30680000	30710000
chr6	30740000	30780000
chr6	30790000	30810000
chr6	30820000	30850000
chr6	30910000	30920000
chr6	30930000	30950000
chr6	30960000	31000000
chr6	31020000	31040000
chr6	31150000	31160000
chr6	31170000	31220000
chr6	31230000	31350000
chr6	31360000	31380000
chr6	31410000	31430000
chr6	31500000	31540000
chr6	31560000	31580000
chr6	31620000	31810000
chr6	31820000	31830000
chr6	31870000	31880000
chr6	32190000	32220000
chr6	32230000	32360000
chr6	32400000	32470000
chr6	32480000	32500000
chr6	32520000	32640000
chr6	32650000	32680000
chr6	32690000	32710000
chr6	32740000	32790000
chr6	32800000	32810000
chr6	32830000	33130000
chr6	33210000	33230000
chr6	33290000	33300000
chr6	33360000	33370000
chr6	33430000	33440000
chr6	33460000	33470000
chr6	33830000	33840000
chr6	33850000	33860000
chr6	33890000	33920000
chr6	33930000	33940000
chr6	33960000	33980000
chr6	34250000	34370000
chr6	34570000	34580000
chr6	34600000	34650000
chr6	34680000	34690000
chr6	34810000	34820000
chr6	34860000	34870000
chr6	34910000	35020000
chr6	35070000	35120000
chr6	35160000	35170000
chr6	35280000	35290000
chr6	35310000	35320000
chr6	35330000	35340000
chr6	35380000	35390000
chr6	35520000	35530000
chr6	35540000	35650000
chr6	35970000	35990000
chr6	36000000	36010000
chr6	36020000	36070000
chr6	36120000	36160000
chr6	36430000	36440000
chr6	36470000	36500000
chr6	36560000	36590000
chr6	36650000	36660000
chr6	36690000	36700000
chr6	37010000	37020000
chr6	37070000	37080000
chr6	37130000	37150000
chr6	37860000	37880000
chr6	37900000	37910000
chr6	37960000	37970000
chr6	38000000	38010000
chr6	38240000	38250000
chr6	39640000	39650000
chr6	42250000	42260000
chr6	42280000	42290000
chr6	42310000	42330000
chr6	42360000	42400000
chr6	42420000	42430000
chr6	42460000	42470000
chr6	42630000	42650000
chr6	42680000	42700000
chr6	42750000	42760000
chr6	42780000	42790000
chr6	42860000	42870000
chr6	43300000	43360000
chr6	45160000	45170000
chr6	45300000	45310000
chr6	45460000	45470000
chr6	45490000	45500000
chr6	45510000	45520000
chr6	54270000	54280000
chr6	137520000	137530000
chr6	137590000	137600000
chr6	138130000	138140000
chr6	138190000	138200000
chr6	149650000	149660000
chr6	158750000	158760000
chr6	159220000	159230000
chr7	520000	530000
chr7	660000	670000
chr7	740000	750000
chr7	1720000	1730000
chr7	1830000	1840000
chr7	2060000	2070000
chr7	2980000	2990000
chr7	3000000	3010000
chr7	3100000	3110000
chr7	3430000	3440000
chr7	3540000	3550000
chr7	3800000	3810000
chr7	5600000	5610000
chr7	7880000	7890000
chr7	30360000	30370000
chr7	44680000	44690000
chr7	74080000	74090000
chr7	74120000	74140000
chr7	75320000	75330000
chr7	99260000	99270000
chr7	99310000	99320000
chr7	99360000	99380000
chr7	99780000	99790000
chr7	99800000	99810000
chr7	100130000	100160000
chr7	100290000	100300000
chr7	150210000	150220000
chr7	150250000	150260000
chr7	150280000	150290000
chr7	150310000	150320000
chr7	150330000	150340000
chr7	150390000	150410000
chr8	1170000	1180000
chr8	8210000	8230000
chr8	8270000	8300000
chr8	8310000	8330000
chr8	8340000	8360000
chr8	8400000	8410000
chr8	8460000	8470000
chr8	8770000	8780000
chr8	11670000	11680000
chr8	16800000	16810000
chr8	19440000	19450000
chr8	19480000	19500000
chr8	22280000	22330000
chr8	22340000	22400000
chr8	22610000	22620000
chr8	22680000	22690000
chr8	22940000	22950000
chr8	23040000	23050000
chr8	23100000	23110000
chr8	24190000	24200000
chr8	26250000	26260000
chr8	28670000	28680000
chr8	28750000	28760000
chr8	28860000	28900000
chr8	29320000	29330000
chr8	29380000	29390000
chr8	29530000	29560000
chr8	29720000	29730000
chr8	38160000	38180000
chr8	38190000	38200000
chr8	38210000	38220000
chr8	39240000	39250000
chr8	39260000	39280000
chr8	39310000	39340000
chr8	41850000	41860000
chr8	41910000	41920000
chr8	43170000	43180000
chr8	43430000	43450000
chr8	43460000	43470000
chr8	43480000	43490000
chr8	43510000	43520000
chr8	43530000	43540000
chr8	43590000	43600000
chr8	43630000	43640000
chr8	47070000	47080000
chr8	48400000	48410000
chr8	66740000	66760000
chr8	71180000	71190000
chr8	71230000	71240000
chr8	71260000	71270000
chr8	96040000	96050000
chr8	96090000	96100000
chr8	96160000	96170000
chr8	100690000	100700000
chr8	101270000	101410000
chr8	101450000	101480000
chr8	101510000	101520000
chr8	102150000	102160000
chr8	102870000	102880000
chr8	102900000	102910000
chr8	102940000	102950000
chr8	110130000	110140000
chr8	110560000	110570000
chr8	114860000	114870000
chr8	115570000	115580000
chr8	119030000	119040000
chr8	122430000	122440000
chr8	123900000	123910000
chr8	124590000	124600000
chr8	125000000	125010000
chr8	125090000	125100000
chr8	125120000	125130000
chr8	125190000	125200000
chr8	125220000	125240000
chr8	125320000	125330000
chr8	125650000	125670000
chr8	125690000	125700000
chr8	125710000	125720000
chr8	125730000	125810000
chr8	125820000	125840000
chr8	125860000	125880000
chr8	125900000	125910000
chr8	125940000	125950000
chr8	126160000	126170000
chr8	126180000	126190000
chr8	126200000	126210000
chr8	126220000	126230000
chr8	126240000	126260000
chr8	126280000	126310000
chr8	126350000	126360000
chr8	131230000	131240000
chr8	131250000	131270000
chr8	131290000	131300000
chr8	131310000	131330000
chr8	132970000	132980000
chr8	134040000	134050000
chr8	134060000	134070000
chr8	138070000	138080000
chr8	138730000	138740000
chr8	141010000	141020000
chr8	141480000	141490000
chr8	141530000	141540000
chr8	141590000	141610000
chr8	141710000	141720000
chr8	141730000	141750000
chr8	141770000	141780000
chr8	141790000	142110000
chr8	142140000	142220000
chr8	142240000	142260000
chr8	142270000	142290000
chr8	142910000	142920000
chr8	143030000	143050000
chr8	143130000	143140000
chr8	143320000	143330000
chr8	143410000	143420000
chr8	143720000	143730000
chr8	143750000	143760000
chr8	143770000	143810000
chr8	143890000	143910000
chr8	143920000	143930000
chr8	143940000	144020000
chr8	144030000	144100000
chr8	144140000	144160000
chr8	144190000	144200000
chr8	144240000	144260000
chr8	144390000	144400000
chr8	144420000	144450000
chr8	144470000	144480000
chr8	144490000	144500000
chr8	144520000	144550000
chr8	144570000	144640000
chr8	144700000	144800000
chr8	144820000	144870000
chr8	144880000	144890000
chr8	144910000	144940000
chr8	144960000	144990000
chr8	145030000	145100000
chr8	145120000	145150000
chr8	145170000	145180000
chr8	145590000	145620000
chr8	145640000	145660000
chr8	145700000	145720000
chr8	145760000	145770000
chr8	145780000	146010000
chr8	146020000	146180000
chr8	146190000	146240000
chr8	146260000	146270000
chr9	270000	280000
chr9	420000	430000
chr9	610000	620000
chr9	35970000	35980000
chr9	36050000	36060000
chr9	37140000	37150000
chr9	37210000	37220000
chr9	37240000	37260000
chr9	37290000	37300000
chr9	132740000	132790000
chr9	139760000	139770000
chr9	139820000	139830000
chr9	140820000	140830000
chr9	140890000	140900000
chr9	140920000	140930000
chr10	250000	260000
chr10	6400000	6410000
chr10	11610000	11620000
chr10	11630000	11650000
chr10	23030000	23040000
chr10	72400000	72410000
chr10	73860000	73870000
chr10	73880000	73890000
chr10	73900000	73910000
chr10	73970000	73990000
chr10	74280000	74300000
chr10	74400000	74410000
chr10	74430000	74440000
chr10	74490000	74500000
chr10	74520000	74530000
chr10	75220000	75230000
chr10	75300000	75320000
chr10	75330000	75340000
chr10	75690000	75710000
chr10	75770000	75780000
chr10	75810000	75820000
chr10	76240000	76250000
chr10	76260000	76270000
chr10	76340000	76350000
chr10	76400000	76410000
chr10	89720000	89730000
chr10	103140000	103160000
chr10	103190000	103240000
chr10	103630000	103690000
chr10	103700000	103780000
chr10	103980000	104140000
chr10	104340000	104350000
chr10	104360000	104370000
chr10	104390000	104400000
chr10	104500000	104510000
chr10	104690000	104700000
chr10	104790000	104810000
chr10	104850000	104860000
chr10	104870000	104880000
chr10	104910000	104920000
chr10	105750000	105770000
chr10	117340000	117350000
chr10	121550000	121560000
chr10	126370000	126380000
chr10	126410000	126420000
chr10	126430000	126440000
chr10	135220000	135230000
chr10	135260000	135270000
chr10	135290000	135310000
chr10	135320000	135340000
chr11	300000	310000
chr11	330000	350000
chr11	360000	370000
chr11	420000	430000
chr11	440000	450000
chr11	460000	470000
chr11	500000	510000
chr11	570000	590000
chr11	600000	610000
chr11	630000	640000
chr11	650000	690000
chr11	710000	720000
chr11	730000	750000
chr11	2630000	2640000
chr11	2800000	2810000
chr11	3980000	3990000
chr11	10550000	10570000
chr11	14720000	14730000
chr11	34780000	34790000
chr11	35090000	35100000
chr11	35190000	35220000
chr11	35230000	35240000
chr11	47000000	47010000
chr11	55360000	55370000
chr11	60250000	60260000
chr11	60300000	60310000
chr11	60730000	60740000
chr11	61700000	61710000
chr11	62480000	62490000
chr11	62820000	62830000
chr11	62840000	62850000
chr11	62860000	62870000
chr11	62880000	62910000
chr11	62920000	62930000
chr11	62980000	62990000
chr11	63020000	63030000
chr11	63050000	63100000
chr11	63110000	63120000
chr11	63130000	63170000
chr11	63240000	63270000
chr11	63340000	63350000
chr11	63390000	63400000
chr11	63410000	63420000
chr11	64230000	64240000
chr11	64260000	64270000
chr11	64280000	64290000
chr11	64710000	64730000
chr11	64750000	64760000
chr11	64770000	64780000
chr11	64790000	64800000
chr11	64940000	64950000
chr11	64960000	64970000
chr11	64990000	65000000
chr11	65030000	65060000
chr11	65130000	65160000
chr11	65170000	65210000
chr11	65220000	65290000
chr11	65460000	65480000
chr11	65490000	65500000
chr11	65510000	65540000
chr11	65570000	65620000
chr11	65690000	65710000
chr11	65760000	65770000
chr11	65840000	65940000
chr11	65950000	65980000
chr11	65990000	66000000
chr11	66350000	66360000
chr11	66430000	66450000
chr11	66510000	66520000
chr11	66530000	66560000
chr11	66570000	66590000
chr11	66910000	66950000
chr11	66970000	66980000
chr11	67080000	67090000
chr11	67420000	67430000
chr11	67920000	67930000
chr11	67940000	67950000
chr11	69140000	69150000
chr11	72570000	72590000
chr11	72640000	72770000
chr11	72780000	72810000
chr11	72820000	72840000
chr11	73180000	73200000
chr11	73210000	73230000
chr11	73750000	73760000
chr11	73780000	73810000
chr11	74090000	74100000
chr11	75650000	75680000
chr11	75720000	75730000
chr11	75800000	75810000
chr11	76620000	76640000
chr11	116900000	116920000
chr11	118070000	118080000
chr11	118100000	118120000
chr11	118130000	118140000
chr11	118160000	118170000
chr11	118220000	118230000
chr11	118310000	118320000
chr11	118620000	118630000
chr11	118640000	118670000
chr11	118690000	118700000
chr11	118710000	118720000
chr11	118730000	118740000
chr11	118750000	118760000
chr11	128280000	128290000
chr11	128310000	128320000
chr11	128340000	128350000
chr12	210000	240000
chr12	250000	280000
chr12	290000	450000
chr12	460000	480000
chr12	490000	520000
chr12	530000	650000
chr12	680000	690000
chr12	700000	1020000
chr12	1030000	1050000
chr12	1070000	1080000
chr12	1110000	1200000
chr12	1210000	1600000
chr12	1620000	1630000
chr12	1760000	1770000
chr12	1790000	1830000
chr12	1840000	1900000
chr12	1970000	1990000
chr12	2000000	2020000
chr12	2060000	2090000
chr12	2100000	2120000
chr12	2130000	2140000
chr12	2190000	2200000
chr12	2210000	2220000
chr12	2250000	2280000
chr12	2290000	2300000
chr12	2310000	2380000
chr12	2390000	2400000
chr12	2410000	2420000
chr12	2430000	2460000
chr12	2470000	2520000
chr12	2530000	2610000
chr12	2650000	2660000
chr12	2810000	2830000
chr12	3020000	3040000
chr12	3480000	3540000
chr12	3550000	3560000
chr12	3570000	3580000
chr12	3590000	3600000
chr12	3610000	3640000
chr12	3650000	3660000
chr12	3670000	3700000
chr12	3710000	3720000
chr12	3730000	3740000
chr12	3750000	3800000
chr12	3820000	3830000
chr12	3890000	3900000
chr12	3970000	3980000
chr12	3990000	4010000
chr12	4030000	4380000
chr12	4520000	4530000
chr12	4570000	4640000
chr12	4650000	4670000
chr12	4690000	4700000
chr12	4710000	4750000
chr12	4760000	4770000
chr12	4790000	4820000
chr12	4840000	4870000
chr12	4980000	5040000
chr12	5050000	5060000
chr12	5070000	5090000
chr12	5110000	5120000
chr12	5210000	5220000
chr12	5240000	5250000
chr12	5280000	5320000
chr12	5330000	5480000
chr12	5490000	5530000
chr12	5650000	5670000
chr12	5680000	5690000
chr12	5700000	5720000
chr12	5740000	5770000
chr12	5810000	5820000
chr12	5850000	5890000
chr12	5920000	5940000
chr12	6190000	6240000
chr12	6250000	6370000
chr12	6380000	6400000
chr12	6440000	6450000
chr12	6470000	6480000
chr12	6500000	6920000
chr12	6950000	6960000
chr12	6980000	7000000
chr12	7010000	7020000
chr12	7090000	7100000
chr12	7110000	7180000
chr12	7240000	7250000
chr12	7420000	7450000
chr12	7470000	7480000
chr12	7490000	7540000
chr12	7550000	7680000
chr12	7690000	7710000
chr12	7720000	7730000
chr12	7740000	7760000
chr12	8040000	8050000
chr12	8080000	8090000
chr12	8120000	8150000
chr12	8280000	8310000
chr12	8840000	8850000
chr12	8860000	8870000
chr12	8880000	8890000
chr12	8910000	8920000
chr12	8930000	8940000
chr12	9000000	9020000
chr12	9090000	9100000
chr12	9110000	9120000
chr12	9160000	9170000
chr12	9230000	9250000
chr12	9300000	9320000
chr12	9330000	9420000
chr12	9430000	9440000
chr12	9510000	9520000
chr12	9770000	9780000
chr12	9790000	9800000
chr12	9820000	9860000
chr12	9880000	9970000
chr12	9980000	10040000
chr12	10050000	10120000
chr12	10130000	10180000
chr12	10190000	10230000
chr12	10240000	10250000
chr12	10270000	10280000
chr12	10290000	10300000
chr12	10470000	10490000
chr12	10500000	10510000
chr12	10520000	10570000
chr12	10600000	10620000
chr12	10630000	10720000
chr12	10750000	10760000
chr12	10810000	10820000
chr12	10850000	10860000
chr12	10950000	10960000
chr12	10970000	10980000
chr12	11090000	11110000
chr12	11120000	11160000
chr12	11190000	11200000
chr12	11250000	11260000
chr12	11270000	11280000
chr12	11290000	11310000
chr12	11410000	11420000
chr12	11430000	11440000
chr12	11450000	11500000
chr12	11520000	11530000
chr12	11790000	12050000
chr12	12060000	12080000
chr12	12120000	12140000
chr12	12270000	12350000
chr12	12360000	12370000
chr12	12390000	12400000
chr12	12540000	12610000
chr12	12620000	12740000
chr12	12760000	12770000
chr12	12780000	12800000
chr12	13200000	13240000
chr12	13260000	13270000
chr12	13300000	13310000
chr12	13560000	13570000
chr12	13590000	13610000
chr12	13640000	13650000
chr12	13660000	13680000
chr12	13700000	13710000
chr12	13740000	13750000
chr12	13810000	13820000
chr12	13830000	13850000
chr12	14050000	14060000
chr12	14150000	14160000
chr12	14170000	14180000
chr12	14190000	14200000
chr12	14510000	14570000
chr12	14580000	14620000
chr12	14780000	14790000
chr12	14970000	15010000
chr12	15030000	15040000
chr12	15050000	15060000
chr12	15100000	15110000
chr12	15120000	15160000
chr12	15250000	15260000
chr12	15290000	15300000
chr12	15410000	15420000
chr12	15510000	15520000
chr12	15580000	15590000
chr12	15640000	15650000
chr12	15760000	15770000
chr12	15780000	15790000
chr12	15800000	15830000
chr12	15860000	15880000
chr12	15900000	15910000
chr12	15930000	15940000
chr12	16340000	16360000
chr12	16440000	16450000
chr12	16590000	16600000
chr12	16620000	16640000
chr12	16680000	16690000
chr12	16700000	16710000
chr12	16820000	16830000
chr12	16840000	16850000
chr12	16890000	16900000
chr12	16920000	16940000
chr12	16950000	16960000
chr12	16980000	16990000
chr12	17060000	17070000
chr12	17130000	17140000
chr12	17150000	17160000
chr12	17180000	17190000
chr12	17220000	17230000
chr12	17240000	17250000
chr12	17260000	17270000
chr12	17280000	17290000
chr12	17300000	17310000
chr12	17390000	17400000
chr12	17410000	17420000
chr12	17430000	17450000
chr12	17520000	17530000
chr12	17540000	17550000
chr12	17570000	17590000
chr12	17600000	17620000
chr12	17650000	17660000
chr12	17670000	17690000
chr12	17720000	17740000
chr12	17760000	17770000
chr12	17860000	17870000
chr12	17900000	17910000
chr12	17920000	17930000
chr12	17950000	17960000
chr12	18100000	18110000
chr12	18360000	18380000
chr12	18490000	18500000
chr12	18540000	18550000
chr12	18570000	18580000
chr12	18590000	18600000
chr12	18610000	18620000
chr12	18640000	18670000
chr12	18680000	18690000
chr12	18710000	18720000
chr12	18740000	18780000
chr12	18830000	18840000
chr12	18920000	18930000
chr12	19110000	19120000
chr12	19140000	19150000
chr12	19170000	19180000
chr12	19670000	19680000
chr12	20230000	20240000
chr12	20320000	20330000
chr12	20430000	20440000
chr12	20770000	20780000
chr12	21080000	21090000
chr12	21180000	21190000
chr12	21210000	21220000
chr12	21240000	21250000
chr12	21930000	21940000
chr12	21950000	21960000
chr12	21970000	21980000
chr12	22000000	22020000
chr12	22070000	22080000
chr12	22100000	22110000
chr12	22300000	22310000
chr12	22320000	22370000
chr12	22390000	22450000
chr12	22460000	22480000
chr12	22490000	22510000
chr12	22530000	22540000
chr12	22560000	22590000
chr12	23550000	23560000
chr12	23590000	23600000
chr12	23630000	23640000
chr12	23700000	23710000
chr12	23750000	23770000
chr12	23780000	23790000
chr12	23800000	23810000
chr12	23830000	23840000
chr12	23910000	23920000
chr12	23930000	23940000
chr12	24310000	24320000
chr12	24560000	24570000
chr12	24650000	24660000
chr12	25150000	25160000
chr12	25190000	25200000
chr12	25270000	25280000
chr12	25660000	25670000
chr12	25680000	25700000
chr12	25730000	25740000
chr12	25750000	25770000
chr12	25790000	25800000
chr12	25860000	25870000
chr12	25880000	25890000
chr12	25900000	25920000
chr12	26040000	26050000
chr12	26320000	26350000
chr12	26360000	26430000
chr12	26450000	26460000
chr12	26470000	26490000
chr12	26520000	26550000
chr12	26560000	26600000
chr12	26620000	26650000
chr12	26870000	26880000
chr12	27110000	27120000
chr12	27160000	27170000
chr12	27230000	27240000
chr12	27250000	27270000
chr12	27290000	27310000
chr12	27320000	27340000
chr12	27370000	27420000
chr12	27430000	27440000
chr12	27660000	27670000
chr12	27690000	27700000
chr12	27710000	27720000
chr12	27780000	27790000
chr12	28350000	28360000
chr12	28380000	28390000
chr12	28410000	28440000
chr12	28450000	28490000
chr12	28500000	28510000
chr12	28530000	28540000
chr12	28550000	28560000
chr12	28600000	28610000
chr12	28620000	28630000
chr12	28650000	28660000
chr12	28810000	28820000
chr12	28890000	28900000
chr12	28910000	28920000
chr12	29230000	29240000
chr12	29960000	29970000
chr12	30120000	30130000
chr12	31970000	32020000
chr12	32040000	32060000
chr12	32370000	32380000
chr12	33190000	33200000
chr12	33220000	33230000
chr12	33270000	33290000
chr12	33320000	33360000
chr12	33370000	33380000
chr12	33400000	33410000
chr12	33420000	33430000
chr12	33450000	33470000
chr12	33480000	33490000
chr12	33520000	33530000
chr12	33570000	33580000
chr12	33620000	33650000
chr12	33680000	33700000
chr12	33710000	33730000
chr12	33740000	33760000
chr12	33790000	33870000
chr12	33880000	33920000
chr12	33930000	33940000
chr12	33960000	33970000
chr12	34000000	34040000
chr12	34050000	34060000
chr12	34070000	34080000
chr12	34560000	34580000
chr12	34590000	34610000
chr12	34640000	34720000
chr12	38010000	38020000
chr12	38040000	38050000
chr12	38140000	38150000
chr12	38210000	38230000
chr12	38250000	38270000
chr12	38300000	38320000
chr12	38340000	38360000
chr12	38380000	38420000
chr12	38430000	38440000
chr12	38570000	38580000
chr12	38610000	38620000
chr12	38970000	38980000
chr12	39070000	39080000
chr12	39170000	39190000
chr12	39230000	39240000
chr12	39260000	39270000
chr12	39310000	39320000
chr12	39760000	39770000
chr12	39880000	39890000
chr12	39960000	39970000
chr12	39990000	40000000
chr12	40070000	40080000
chr12	40180000	40190000
chr12	40640000	40650000
chr12	40680000	40690000
chr12	40760000	40770000
chr12	40860000	40870000
chr12	41060000	41070000
chr12	41130000	41140000
chr12	41160000	41170000
chr12	41230000	41240000
chr12	41420000	41430000
chr12	41460000	41470000
chr12	41930000	41950000
chr12	41990000	42000000
chr12	42260000	42270000
chr12	42290000	42300000
chr12	42310000	42320000
chr12	42610000	42620000
chr12	43430000	43440000
chr12	43650000	43660000
chr12	43970000	43980000
chr12	44500000	44510000
chr12	44540000	44550000
chr12	44580000	44600000
chr12	44630000	44640000
chr12	44660000	44670000
chr12	44720000	44730000
chr12	44740000	44750000
chr12	44800000	44820000
chr12	44830000	44840000
chr12	44910000	44920000
chr12	44930000	44950000
chr12	45020000	45030000
chr12	45070000	45080000
chr12	45100000	45110000
chr12	45140000	45150000
chr12	45670000	45680000
chr12	45690000	45700000
chr12	45720000	45740000
chr12	45750000	45760000
chr12	45840000	45850000
chr12	46030000	46050000
chr12	46150000	46160000
chr12	46170000	46180000
chr12	46200000	46210000
chr12	46220000	46230000
chr12	46550000	46580000
chr12	46590000	46620000
chr12	46630000	46640000
chr12	46650000	46670000
chr12	46680000	46700000
chr12	46710000	46720000
chr12	46750000	46760000
chr12	46780000	46790000
chr12	46800000	46930000
chr12	46940000	46990000
chr12	47000000	47010000
chr12	47020000	47030000
chr12	47080000	47090000
chr12	47110000	47130000
chr12	47140000	47150000
chr12	47160000	47230000
chr12	47250000	47290000
chr12	47300000	47310000
chr12	47510000	47520000
chr12	47530000	47550000
chr12	47560000	47570000
chr12	47580000	47620000
chr12	47630000	47640000
chr12	47650000	47770000
chr12	47800000	47810000
chr12	47820000	47830000
chr12	47870000	47880000
chr12	47900000	47910000
chr12	48450000	48470000
chr12	48480000	48490000
chr12	48510000	48520000
chr12	48580000	48590000
chr12	48600000	48710000
chr12	48720000	48790000
chr12	48800000	48820000
chr12	48830000	48930000
chr12	48950000	48970000
chr12	48990000	49010000
chr12	49290000	49360000
chr12	49400000	49420000
chr12	49450000	49510000
chr12	49520000	49550000
chr12	49560000	49610000
chr12	49620000	49630000
chr12	49680000	49690000
chr12	49700000	49710000
chr12	49740000	49930000
chr12	49960000	50190000
chr12	50200000	50240000
chr12	50250000	50270000
chr12	50310000	50340000
chr12	50370000	50420000
chr12	50430000	50450000
chr12	50480000	50490000
chr12	50520000	50740000
chr12	50750000	50800000
chr12	50810000	50840000
chr12	50860000	51100000
chr12	51180000	51190000
chr12	51200000	51410000
chr12	51420000	51430000
chr12	51440000	51450000
chr12	51470000	51590000
chr12	51600000	51640000
chr12	51650000	51710000
chr12	51720000	51740000
chr12	51820000	51890000
chr12	51900000	51950000
chr12	51960000	52180000
chr12	52270000	52280000
chr12	52350000	52390000
chr12	52610000	52640000
chr12	52650000	52680000
chr12	52710000	52750000
chr12	52760000	52840000
chr12	52850000	52860000
chr12	52870000	52940000
chr12	52970000	53180000
chr12	53190000	53220000
chr12	53320000	53330000
chr12	53500000	53510000
chr12	53520000	53620000
chr12	53630000	53830000
chr12	53840000	53880000
chr12	53930000	53960000
chr12	53970000	54050000
chr12	54150000	54210000
chr12	54220000	54230000
chr12	54240000	54320000
chr12	54430000	54470000
chr12	54580000	54590000
chr12	54640000	54650000
chr12	55080000	55090000
chr12	55100000	55120000
chr12	55140000	55170000
chr12	55180000	55200000
chr12	55220000	55370000
chr12	55380000	55480000
chr12	55500000	55540000
chr12	55590000	55600000
chr12	55620000	55630000
chr12	55640000	55720000
chr12	55730000	55800000
chr12	55810000	55850000
chr12	55860000	55900000
chr12	55910000	55920000
chr12	55940000	55950000
chr12	55970000	55990000
chr12	56190000	56220000
chr12	56230000	56250000
chr12	56270000	56340000
chr12	56350000	56390000
chr12	56430000	56450000
chr12	56490000	56600000
chr12	56610000	56620000
chr12	56640000	56650000
chr12	56660000	56680000
chr12	56690000	56760000
chr12	56780000	56800000
chr12	56810000	56850000
chr12	56900000	56930000
chr12	56960000	56970000
chr12	57170000	57180000
chr12	57190000	57280000
chr12	57290000	57350000
chr12	57380000	57390000
chr12	57400000	57410000
chr12	57430000	57470000
chr12	57500000	57520000
chr12	57650000	57660000
chr12	57680000	57770000
chr12	57790000	57810000
chr12	57830000	57850000
chr12	59070000	59080000
chr12	59140000	59150000
chr12	59370000	59390000
chr12	60050000	60060000
chr12	60730000	60740000
chr12	61110000	61130000
chr12	61140000	61160000
chr12	61170000	61180000
chr12	61470000	61480000
chr12	61690000	61700000
chr12	61720000	61730000
chr12	62180000	62200000
chr12	62740000	62750000
chr12	64430000	64450000
chr12	66220000	66230000
chr12	67950000	67980000
chr12	67990000	68010000
chr12	68020000	68030000
chr12	68040000	68050000
chr12	68070000	68090000
chr12	68180000	68190000
chr12	68480000	68500000
chr12	68510000	68530000
chr12	68600000	68620000
chr12	68680000	68690000
chr12	68770000	68780000
chr12	68800000	68810000
chr12	68820000	68960000
chr12	68970000	68980000
chr12	69000000	69010000
chr12	69020000	69040000
chr12	69450000	69460000
chr12	69660000	69670000
chr12	69770000	69780000
chr12	69820000	69830000
chr12	69870000	69890000
chr12	69920000	69940000
chr12	69950000	69960000
chr12	70420000	70430000
chr12	70440000	70450000
chr12	70470000	70480000
chr12	70590000	70600000
chr12	70710000	70730000
chr12	71270000	71280000
chr12	71340000	71360000
chr12	71370000	71380000
chr12	71790000	71800000
chr12	73040000	73050000
chr12	73110000	73120000
chr12	73440000	73450000
chr12	73580000	73590000
chr12	73720000	73730000
chr12	73790000	73810000
chr12	74010000	74020000
chr12	74060000	74070000
chr12	74320000	74330000
chr12	74440000	74450000
chr12	74480000	74490000
chr12	75240000	75250000
chr12	75390000	75400000
chr12	75470000	75480000
chr12	75520000	75530000
chr12	75540000	75550000
chr12	76090000	76110000
chr12	76710000	76720000
chr12	77200000	77220000
chr12	78950000	78960000
chr12	79020000	79030000
chr12	79090000	79100000
chr12	79160000	79170000
chr12	79310000	79320000
chr12	79390000	79400000
chr12	79420000	79450000
chr12	80490000	80500000
chr12	80850000	80860000
chr12	81000000	81010000
chr12	81050000	81060000
chr12	81070000	81080000
chr12	81560000	81570000
chr12	82230000	82240000
chr12	82430000	82440000
chr12	82530000	82540000
chr12	83370000	83380000
chr12	84030000	84040000
chr12	84050000	84070000
chr12	84360000	84370000
chr12	84470000	84480000
chr12	84560000	84580000
chr12	85020000	85030000
chr12	85290000	85300000
chr12	85950000	85960000
chr12	85980000	86000000
chr12	86030000	86040000
chr12	86070000	86080000
chr12	86090000	86110000
chr12	86530000	86540000
chr12	86710000	86720000
chr12	86900000	86910000
chr12	87000000	87010000
chr12	87030000	87060000
chr12	87130000	87140000
chr12	87180000	87190000
chr12	87210000	87220000
chr12	87240000	87250000
chr12	87330000	87360000
chr12	87440000	87460000
chr12	87470000	87480000
chr12	87490000	87500000
chr12	87520000	87530000
chr12	87610000	87620000
chr12	87710000	87720000
chr12	87770000	87780000
chr12	87790000	87800000
chr12	88100000	88120000
chr12	88670000	88740000
chr12	88750000	88760000
chr12	88790000	88820000
chr12	88880000	88910000
chr12	89050000	89060000
chr12	89090000	89110000
chr12	89210000	89230000
chr12	89530000	89590000
chr12	89600000	89700000
chr12	89710000	89730000
chr12	89750000	89760000
chr12	90120000	90130000
chr12	90210000	90250000
chr12	90260000	90290000
chr12	90300000	90330000
chr12	90390000	90400000
chr12	90530000	90540000
chr12	90710000	90720000
chr12	90770000	90790000
chr12	90810000	90820000
chr12	90860000	90870000
chr12	90900000	90910000
chr12	90930000	90950000
chr12	90970000	90980000
chr12	91020000	91050000
chr12	91090000	91100000
chr12	91150000	91160000
chr12	91390000	91400000
chr12	91440000	91450000
chr12	91490000	91500000
chr12	91520000	91530000
chr12	91550000	91560000
chr12	91570000	91600000
chr12	91610000	91630000
chr12	91640000	91650000
chr12	91660000	91670000
chr12	91700000	91710000
chr12	91840000	91850000
chr12	91870000	91880000
chr12	91890000	91900000
chr12	91920000	91930000
chr12	91950000	91990000
chr12	92000000	92020000
chr12	92030000	92050000
chr12	92070000	92120000
chr12	92130000	92150000
chr12	92170000	92190000
chr12	92200000	92400000
chr12	92410000	92480000
chr12	92510000	92520000
chr12	92550000	92560000
chr12	92600000	92710000
chr12	92720000	92930000
chr12	92950000	92960000
chr12	93480000	93490000
chr12	93510000	93650000
chr12	94000000	94010000
chr12	94020000	94030000
chr12	94080000	94090000
chr12	94110000	94140000
chr12	94150000	94200000
chr12	94220000	94230000
chr12	94250000	94270000
chr12	94310000	94320000
chr12	94340000	94360000
chr12	94690000	94700000
chr12	94720000	94750000
chr12	94760000	94770000
chr12	94800000	94810000
chr12	94820000	94830000
chr12	95600000	95620000
chr12	95640000	95660000
chr12	96680000	96760000
chr12	96770000	96790000
chr12	97030000	97040000
chr12	97190000	97200000
chr12	97980000	97990000
chr12	98070000	98080000
chr12	98230000	98240000
chr12	99620000	99630000
chr12	99680000	99690000
chr12	99870000	99880000
chr12	99960000	99980000
chr12	101310000	101330000
chr12	101480000	101490000
chr12	101550000	101560000
chr12	101980000	101990000
chr12	102030000	102050000
chr12	102070000	102080000
chr12	102150000	102160000
chr12	102480000	102490000
chr12	102710000	102730000
chr12	102770000	102780000
chr12	102820000	102830000
chr12	102850000	102860000
chr12	103430000	103440000
chr12	103460000	103470000
chr12	103490000	103500000
chr12	103520000	103530000
chr12	103540000	103550000
chr12	103560000	103570000
chr12	103620000	103630000
chr12	103650000	103670000
chr12	103680000	103700000
chr12	103790000	103810000
chr12	103850000	103860000
chr12	104880000	104890000
chr12	104900000	104950000
chr12	104960000	104970000
chr12	105000000	105010000
chr12	105030000	105050000
chr12	105060000	105070000
chr12	105160000	105170000
chr12	105190000	105270000
chr12	105280000	105300000
chr12	105310000	105330000
chr12	105340000	105350000
chr12	106010000	106030000
chr12	106080000	106090000
chr12	106120000	106130000
chr12	106180000	106190000
chr12	106260000	106270000
chr12	106280000	106300000
chr12	106310000	106320000
chr12	106330000	106340000
chr12	106360000	106370000
chr12	106390000	106400000
chr12	107010000	107020000
chr12	107640000	107660000
chr12	107690000	107710000
chr12	108240000	108250000
chr12	108360000	108370000
chr12	108800000	108810000
chr12	109040000	109100000
chr12	109110000	109150000
chr12	109170000	109180000
chr12	109190000	109200000
chr12	109750000	109760000
chr12	109780000	109790000
chr12	109820000	109830000
chr12	110120000	110140000
chr12	110180000	110190000
chr12	110380000	110390000
chr12	110430000	110450000
chr12	110530000	110540000
chr12	110550000	110820000
chr12	110930000	110960000
chr12	110970000	111090000
chr12	111100000	111120000
chr12	111140000	111180000
chr12	111390000	111400000
chr12	111430000	111440000
chr12	111460000	111470000
chr12	111480000	111490000
chr12	111500000	111520000
chr12	111540000	111570000
chr12	111590000	111600000
chr12	111890000	111940000
chr12	111950000	112000000
chr12	112250000	112270000
chr12	112320000	112350000
chr12	112360000	112450000
chr12	112460000	112530000
chr12	112590000	112600000
chr12	112620000	112640000
chr12	112650000	112710000
chr12	112720000	112770000
chr12	112780000	112810000
chr12	113040000	113050000
chr12	113080000	113090000
chr12	113150000	113160000
chr12	113420000	113430000
chr12	115290000	115300000
chr12	115530000	115540000
chr12	115760000	115770000
chr12	115790000	115800000
chr12	115850000	115860000
chr12	115900000	115910000
chr12	115920000	115930000
chr12	116480000	116710000
chr12	116730000	116740000
chr12	116750000	116790000
chr12	116830000	116850000
chr12	116860000	116890000
chr12	116900000	116970000
chr12	116990000	117010000
chr12	118620000	118630000
chr12	118660000	118680000
chr12	118730000	118780000
chr12	119090000	119100000
chr12	119230000	119250000
chr12	119260000	119270000
chr12	119330000	119340000
chr12	119650000	119660000
chr12	119680000	119690000
chr12	119700000	119720000
chr12	120200000	120210000
chr12	120230000	120240000
chr12	120260000	120270000
chr12	120370000	120380000
chr12	120410000	120500000
chr12	120510000	120520000
chr12	120680000	120690000
chr12	120810000	120830000
chr12	120860000	120880000
chr12	120890000	120960000
chr12	120970000	121000000
chr12	121060000	121070000
chr12	121080000	121090000
chr12	121130000	121160000
chr12	121180000	121430000
chr12	121450000	121520000
chr12	121530000	121540000
chr12	121550000	121590000
chr12	121600000	121670000
chr12	121690000	121810000
chr12	121820000	122170000
chr12	122180000	122230000
chr12	122240000	122260000
chr12	122270000	122280000
chr12	122300000	122460000
chr12	122470000	122490000
chr12	122500000	122530000
chr12	122580000	122610000
chr12	122630000	122670000
chr12	122690000	122700000
chr12	122720000	122750000
chr12	122760000	122770000
chr12	122780000	123180000
chr12	123200000	123320000
chr12	123330000	123340000
chr12	123350000	123460000
chr12	123500000	123590000
chr12	123600000	123690000
chr12	123700000	123720000
chr12	123770000	123780000
chr12	123790000	123810000
chr12	123820000	123830000
chr12	123860000	123880000
chr12	123890000	123900000
chr12	123910000	123970000
chr12	123990000	124000000
chr12	124030000	124040000
chr12	124280000	124330000
chr12	124620000	124640000
chr12	124650000	124670000
chr12	124690000	124700000
chr12	124710000	124720000
chr12	125050000	125060000
chr12	125070000	125100000
chr12	125120000	125130000
chr12	125180000	125190000
chr12	126210000	126220000
chr12	127090000	127100000
chr12	128290000	128300000
chr12	128350000	128370000
chr12	128380000	128390000
chr12	130070000	130090000
chr12	130690000	130700000
chr12	130750000	130760000
chr12	131800000	131810000
chr12	132260000	132270000
chr12	132450000	132460000
chr12	132480000	132490000
chr12	133090000	133100000
chr12	133320000	133330000
chr12	133350000	133360000
chr12	133380000	133410000
chr12	133430000	133440000
chr12	133470000	133480000
chr12	133680000	133760000
chr13	114930000	114990000
chr13	115010000	115020000
chr14	20480000	20490000
chr14	20520000	20530000
chr14	20590000	20600000
chr14	21310000	21320000
chr14	21830000	21840000
chr14	21870000	21880000
chr14	22360000	22370000
chr14	22400000	22410000
chr14	22470000	22480000
chr14	22540000	22550000
chr14	22670000	22680000
chr14	22780000	22790000
chr14	22870000	22880000
chr14	22900000	22910000
chr14	22940000	22950000
chr14	23230000	23240000
chr14	24150000	24160000
chr14	24180000	24190000
chr14	24280000	24290000
chr14	50360000	50380000
chr14	50390000	50400000
chr14	50410000	50440000
chr14	50460000	50510000
chr14	50520000	50540000
chr14	68510000	68520000
chr14	68550000	68560000
chr14	68570000	68580000
chr14	68600000	68620000
chr14	68840000	68850000
chr14	68870000	68880000
chr14	68980000	68990000
chr14	75850000	75860000
chr14	75970000	75980000
chr14	76250000	76260000
chr14	92250000	92300000
chr14	98780000	98790000
chr14	101410000	101420000
chr14	101430000	101450000
chr14	102270000	102290000
chr14	102310000	102330000
chr14	103180000	103190000
chr14	103240000	103330000
chr14	103340000	103360000
chr14	103640000	103660000
chr14	103700000	103720000
chr14	103860000	103870000
chr14	103960000	103970000
chr14	104280000	104290000
chr14	104800000	104810000
chr14	104870000	104880000
chr14	104920000	104930000
chr14	105570000	105580000
chr14	106240000	106250000
chr14	106260000	106300000
chr14	106330000	106340000
chr14	106530000	106560000
chr14	106670000	106680000
chr14	106690000	106730000
chr14	106760000	106770000
chr14	106880000	106930000
chr14	106950000	106960000
chr14	106970000	107030000
chr14	107040000	107080000
chr14	107100000	107110000
chr14	107120000	107130000
chr14	107140000	107180000
chr14	107190000	107200000
chr15	44950000	44960000
chr15	50370000	50380000
chr15	75370000	75380000
chr15	93440000	93450000
chr16	2400000	2410000
chr16	34990000	35010000
chr16	70960000	70970000
chr17	120000	130000
chr17	2050000	2060000
chr17	2110000	2120000
chr17	2140000	2150000
chr17	2530000	2540000
chr17	3020000	3030000
chr17	3120000	3130000
chr17	3250000	3270000
chr17	4130000	4140000
chr17	4200000	4220000
chr17	12400000	12410000
chr17	21780000	21790000
chr17	21970000	21980000
chr17	21990000	22000000
chr17	22020000	22030000
chr17	22070000	22120000
chr17	22140000	22150000
chr17	25630000	25640000
chr17	28220000	28230000
chr17	33650000	33660000
chr17	33680000	33710000
chr17	33730000	33760000
chr17	37930000	37940000
chr17	37960000	37980000
chr17	38000000	38020000
chr17	38450000	38460000
chr17	39150000	39160000
chr17	39230000	39240000
chr17	39250000	39260000
chr17	39270000	39290000
chr17	39300000	39310000
chr17	39320000	39340000
chr17	39410000	39420000
chr17	40490000	40500000
chr17	43420000	43430000
chr17	45470000	45480000
chr17	46410000	46420000
chr17	46460000	46470000
chr17	49070000	49090000
chr17	51250000	51260000
chr17	53190000	53200000
chr17	78760000	78770000
chr17	80780000	80800000
chr17	80850000	80860000
chr17	80870000	80880000
chr17	80900000	80920000
chr17	80930000	80960000
chr17	80970000	80980000
chr17	81100000	81120000
chr18	180000	210000
chr18	230000	260000
chr18	280000	300000
chr18	320000	500000
chr18	550000	560000
chr18	750000	760000
chr18	1070000	1110000
chr18	1120000	1250000
chr18	1260000	1290000
chr18	1310000	1320000
chr18	1340000	1370000
chr18	1390000	1410000
chr18	1440000	1450000
chr18	1480000	1490000
chr18	1610000	1640000
chr18	1670000	1760000
chr18	1780000	1790000
chr18	1800000	1810000
chr18	1820000	1830000
chr18	1840000	1850000
chr18	1870000	1890000
chr18	1900000	1910000
chr18	1920000	1930000
chr18	2030000	2040000
chr18	2060000	2080000
chr18	2140000	2150000
chr18	2180000	2200000
chr18	2210000	2220000
chr18	2230000	2240000
chr18	2280000	2310000
chr18	2330000	2350000
chr18	2360000	2390000
chr18	2430000	2440000
chr18	2460000	2470000
chr18	2600000	2610000
chr18	2660000	2670000
chr18	2700000	2820000
chr18	2870000	2880000
chr18	2930000	3170000
chr18	3180000	3190000
chr18	3200000	3210000
chr18	3290000	3300000
chr18	3320000	3340000
chr18	3350000	3360000
chr18	3380000	3390000
chr18	3400000	3410000
chr18	3440000	3480000
chr18	3490000	3550000
chr18	3570000	3580000
chr18	3600000	3610000
chr18	3840000	3850000
chr18	3870000	3890000
chr18	3910000	3920000
chr18	4280000	4290000
chr18	4340000	4350000
chr18	4360000	4370000
chr18	4390000	4400000
chr18	4460000	4470000
chr18	4490000	4500000
chr18	4540000	4560000
chr18	4580000	4590000
chr18	4600000	4650000
chr18	4670000	4680000
chr18	4740000	4750000
chr18	4790000	4800000
chr18	4810000	4820000
chr18	4860000	4880000
chr18	4930000	4940000
chr18	5340000	5350000
chr18	5680000	5690000
chr18	6070000	6080000
chr18	6120000	6130000
chr18	6170000	6180000
chr18	6220000	6230000
chr18	6540000	6550000
chr18	6650000	6670000
chr18	6730000	6740000
[truncated: 908 more rows]

## Sheet: HK1
Supplementary Table S6: FIREs called by FIREcaller from HiC libraries
Chr	Start	End
chr1	6880000	6890000
chr1	8150000	8160000
chr1	8610000	8650000
chr1	8680000	8690000
chr1	8740000	8750000
chr1	21220000	21250000
chr1	21260000	21270000
chr1	21280000	21340000
chr1	21360000	21410000
chr1	21420000	21430000
chr1	23370000	23380000
chr1	23420000	23430000
chr1	23450000	23460000
chr1	23610000	23620000
chr1	23630000	23640000
chr1	27050000	27060000
chr1	31920000	31930000
chr1	39720000	39730000
chr1	63060000	63070000
chr1	78410000	78440000
chr1	93820000	93830000
chr1	94010000	94020000
chr1	94270000	94280000
chr1	94650000	94670000
chr1	94680000	94700000
chr1	95100000	95110000
chr1	114040000	114060000
chr1	145590000	145600000
chr1	145620000	145640000
chr1	145660000	145670000
chr1	146610000	146630000
chr1	147200000	147210000
chr1	150000000	150070000
chr1	150660000	150670000
chr1	150680000	150690000
chr1	151900000	151910000
chr1	152200000	152210000
chr1	152310000	152320000
chr1	152980000	152990000
chr1	153070000	153080000
chr1	155430000	155440000
chr1	155460000	155470000
chr1	156410000	156420000
chr1	167370000	167380000
chr1	168030000	168040000
chr1	171530000	171540000
chr1	172220000	172230000
chr1	172550000	172560000
chr1	172570000	172580000
chr1	172970000	172980000
chr1	174810000	174820000
chr1	178070000	178080000
chr1	178090000	178100000
chr1	178130000	178160000
chr1	178190000	178210000
chr1	178280000	178290000
chr1	182990000	183000000
chr1	183100000	183110000
chr1	186320000	186330000
chr1	190700000	190710000
chr1	200710000	200720000
chr1	200740000	200770000
chr1	201210000	201220000
chr1	205680000	205690000
chr1	207410000	207420000
chr1	207440000	207450000
chr1	207510000	207520000
chr1	209850000	209870000
chr1	223040000	223050000
chr1	227330000	227340000
chr1	227840000	227850000
chr1	235380000	235390000
chr1	235890000	235900000
chr1	243870000	243880000
chr1	244650000	244660000
chr2	20470000	20480000
chr2	44120000	44130000
chr2	44200000	44210000
chr2	71640000	71650000
chr2	99990000	100000000
chr2	100040000	100060000
chr2	113510000	113520000
chr2	113530000	113540000
chr2	174050000	174070000
chr2	174980000	174990000
chr2	178400000	178410000
chr2	183790000	183800000
chr2	183830000	183840000
chr2	192220000	192230000
chr2	192270000	192280000
chr3	196930000	196940000
chr7	3430000	3440000
chr7	3540000	3560000
chr7	5100000	5110000
chr7	5690000	5700000
chr7	6230000	6250000
chr7	6290000	6300000
chr7	7200000	7210000
chr7	7280000	7290000
chr7	7580000	7590000
chr7	7880000	7890000
chr7	11140000	11170000
chr7	11180000	11200000
chr7	12190000	12200000
chr7	12270000	12280000
chr7	12560000	12570000
chr7	12850000	12860000
chr7	14960000	14970000
chr7	15440000	15450000
chr7	16260000	16270000
chr7	16320000	16340000
chr7	16350000	16360000
chr7	16380000	16390000
chr7	16400000	16410000
chr7	16820000	16830000
chr7	17250000	17270000
chr7	17870000	17880000
chr7	18500000	18510000
chr7	18560000	18570000
chr7	18950000	18970000
chr7	18980000	18990000
chr7	19040000	19050000
chr7	19320000	19330000
chr7	20010000	20020000
chr7	22250000	22260000
chr7	22300000	22310000
chr7	22320000	22330000
chr7	22340000	22350000
chr7	22770000	22780000
chr7	22960000	23000000
chr7	23010000	23050000
chr7	23080000	23100000
chr7	24890000	24900000
chr7	24910000	25030000
chr7	25430000	25440000
chr7	26220000	26230000
chr7	26880000	26890000
chr7	26980000	26990000
chr7	27640000	27650000
chr7	27660000	27680000
chr7	27780000	27800000
chr7	27820000	27850000
chr7	29260000	29270000
chr7	30250000	30260000
chr7	30340000	30410000
chr7	30430000	30460000
chr7	30640000	30650000
chr7	30980000	30990000
chr7	31500000	31510000
chr7	31620000	31630000
chr7	31940000	31950000
chr7	31960000	31970000
chr7	33500000	33510000
chr7	33940000	33950000
chr7	35870000	35900000
chr7	35910000	35920000
chr7	36440000	36450000
chr7	36460000	36480000
chr7	36700000	36710000
chr7	37740000	37750000
chr7	38170000	38180000
chr7	38520000	38530000
chr7	39060000	39070000
chr7	40050000	40060000
chr7	41190000	41200000
chr7	41240000	41260000
chr7	43450000	43460000
chr7	43630000	43680000
chr7	43700000	43740000
chr7	43750000	43760000
chr7	44390000	44400000
chr7	45390000	45400000
chr7	45510000	45520000
chr7	46130000	46170000
chr7	46270000	46280000
chr7	46290000	46300000
chr7	46830000	46840000
chr7	47040000	47050000
chr7	48020000	48030000
chr7	48060000	48070000
chr7	48290000	48310000
chr7	48780000	48790000
chr7	48840000	48850000
chr7	49100000	49110000
chr7	54910000	54920000
chr7	54930000	54950000
chr7	54970000	55080000
chr7	55090000	55110000
chr7	55120000	55160000
chr7	55170000	55180000
chr7	55200000	55220000
chr7	55260000	55280000
chr7	55520000	55530000
chr7	62170000	62180000
chr7	62260000	62270000
chr7	62300000	62310000
chr7	62390000	62400000
chr7	72860000	72890000
chr7	72900000	72920000
chr7	74130000	74140000
chr7	75750000	75760000
chr7	75780000	75790000
chr7	77010000	77020000
chr7	77030000	77040000
chr7	77170000	77180000
chr7	77230000	77250000
chr7	77260000	77270000
chr7	77360000	77370000
chr7	77380000	77410000
chr7	77430000	77440000
chr7	77480000	77490000
chr7	79110000	79120000
chr7	79820000	79860000
chr7	79890000	79910000
chr7	83690000	83700000
chr7	83810000	83820000
chr7	83930000	83950000
chr7	83980000	83990000
chr7	84150000	84160000
chr7	84250000	84260000
chr7	84280000	84300000
chr7	86650000	86670000
chr7	86690000	86710000
chr7	87040000	87050000
chr7	89830000	89840000
chr7	91640000	91710000
chr7	91860000	91870000
chr7	91950000	91970000
chr7	92020000	92030000
chr7	92320000	92330000
chr7	92350000	92360000
chr7	92380000	92460000
chr7	92480000	92490000
chr7	92500000	92510000
chr7	92520000	92550000
chr7	92600000	92610000
chr7	92920000	92930000
chr7	93280000	93290000
chr7	96470000	96480000
chr7	97720000	97730000
chr7	98580000	98590000
chr7	98690000	98740000
chr7	98750000	98760000
chr7	98790000	98800000
chr7	99310000	99320000
chr7	99340000	99380000
chr7	99390000	99410000
chr7	99490000	99500000
chr7	100140000	100150000
chr7	102490000	102500000
chr7	102510000	102520000
chr7	102530000	102560000
chr7	102570000	102580000
chr7	102620000	102650000
chr7	103310000	103320000
chr7	103370000	103380000
chr7	104660000	104670000
chr7	104680000	104690000
chr7	104700000	104720000
chr7	104740000	104760000
chr7	104780000	104790000
chr7	104800000	104880000
chr7	104890000	104910000
chr7	104920000	104930000
chr7	104940000	104950000
chr7	105880000	105920000
chr7	105960000	106010000
chr7	106040000	106060000
chr7	106070000	106100000
chr7	106890000	106900000
chr7	106940000	106950000
chr7	107010000	107020000
chr7	107100000	107130000
chr7	107150000	107160000
chr7	107540000	107580000
chr7	107610000	107640000
chr7	110960000	110980000
chr7	112870000	112880000
chr7	112890000	112900000
chr7	113980000	113990000
chr7	114900000	114910000
chr7	114930000	114940000
chr7	115910000	116010000
chr7	116020000	116150000
chr7	116300000	116320000
chr7	116330000	116420000
chr7	117560000	117570000
chr7	117740000	117750000
chr7	120990000	121000000
chr7	121010000	121040000
chr7	121090000	121100000
chr7	121120000	121130000
chr7	121180000	121190000
chr7	123320000	123380000
chr7	123390000	123400000
chr7	123420000	123430000
chr7	124210000	124220000
chr7	124780000	124790000
chr7	124820000	124830000
chr7	126240000	126250000
chr7	127390000	127400000
chr7	127460000	127470000
chr7	127510000	127520000
chr7	127600000	127610000
chr7	128380000	128400000
chr7	128600000	128610000
chr7	128980000	128990000
chr7	129020000	129030000
chr7	129060000	129070000
chr7	129270000	129280000
chr7	129490000	129500000
chr7	129510000	129520000
chr7	129540000	129550000
chr7	130040000	130050000
chr7	130620000	130650000
chr7	130660000	130670000
chr7	130690000	130700000
chr7	130830000	130840000
chr7	130960000	130970000
chr7	131020000	131060000
chr7	131080000	131100000
chr7	135070000	135130000
chr7	136740000	136750000
chr7	136860000	136870000
chr7	138910000	138920000
chr7	139080000	139090000
chr7	141700000	141710000
chr7	141740000	141750000
chr7	142930000	142940000
chr7	143610000	143620000
chr7	143720000	143730000
chr7	148460000	148470000
chr7	148510000	148530000
chr7	150310000	150320000
chr7	150400000	150410000
chr7	151200000	151210000
chr7	151340000	151350000
chr7	155510000	155520000
chr7	156510000	156520000
chr7	156940000	156950000
chr7	156970000	156980000
chr7	157000000	157010000
chr7	158470000	158490000
chr7	158560000	158570000
chr7	158580000	158600000
chr7	158610000	158620000
chr8	6400000	6420000
chr8	8210000	8220000
chr8	8280000	8300000
chr8	8390000	8420000
chr8	8460000	8470000
chr8	9460000	9470000
chr8	9490000	9500000
chr8	9540000	9560000
chr8	9590000	9600000
chr8	9910000	9920000
chr8	9950000	9960000
chr8	10030000	10040000
chr8	10590000	10610000
chr8	11670000	11680000
chr8	13400000	13410000
chr8	16180000	16200000
chr8	16230000	16240000
chr8	16310000	16320000
chr8	16430000	16440000
chr8	16490000	16500000
chr8	16800000	16810000
chr8	17130000	17140000
chr8	17570000	17590000
chr8	17610000	17630000
chr8	17670000	17680000
chr8	17720000	17730000
chr8	17790000	17800000
chr8	17840000	17850000
chr8	18230000	18240000
chr8	18480000	18490000
chr8	18880000	18890000
chr8	18980000	19010000
chr8	19050000	19070000
chr8	21860000	21870000
chr8	22090000	22100000
chr8	22190000	22200000
chr8	22320000	22330000
chr8	22660000	22670000
chr8	22680000	22690000
chr8	22900000	22910000
chr8	22940000	22950000
chr8	22970000	22980000
chr8	23010000	23020000
chr8	23040000	23050000
chr8	23060000	23080000
chr8	23090000	23110000
chr8	23440000	23450000
chr8	23500000	23510000
chr8	23670000	23680000
chr8	23910000	23920000
chr8	23980000	24000000
chr8	24010000	24020000
chr8	24110000	24120000
chr8	24760000	24770000
chr8	24830000	24840000
chr8	25060000	25070000
chr8	25080000	25100000
chr8	25110000	25310000
chr8	25570000	25580000
chr8	26150000	26170000
chr8	26180000	26200000
chr8	26220000	26230000
chr8	26250000	26260000
chr8	26730000	26740000
chr8	26820000	26830000
chr8	26910000	26920000
chr8	27590000	27600000
chr8	27670000	27680000
chr8	27990000	28040000
chr8	28090000	28100000
chr8	28420000	28430000
chr8	28790000	28800000
chr8	28810000	28850000
chr8	28860000	28880000
chr8	28890000	28900000
chr8	29550000	29560000
chr8	29610000	29620000
chr8	29720000	29730000
chr8	29770000	29790000
chr8	30850000	30860000
chr8	30870000	30890000
chr8	30960000	30980000
chr8	32100000	32110000
chr8	32160000	32170000
chr8	32210000	32220000
chr8	32450000	32480000
chr8	32500000	32520000
chr8	38160000	38190000
chr8	38210000	38220000
chr8	38700000	38720000
chr8	38820000	38830000
chr8	38840000	38850000
chr8	38860000	38920000
chr8	38930000	38960000
chr8	39020000	39030000
chr8	39050000	39080000
chr8	39100000	39130000
chr8	39140000	39160000
chr8	39170000	39180000
chr8	39370000	39380000
chr8	39390000	39400000
chr8	39500000	39510000
chr8	39550000	39560000
chr8	41670000	41680000
chr8	41850000	41860000
chr8	43170000	43180000
chr8	43320000	43330000
chr8	43430000	43450000
chr8	43460000	43470000
chr8	43480000	43500000
chr8	43510000	43550000
chr8	43570000	43640000
chr8	43650000	43670000
chr8	43680000	43690000
chr8	47070000	47080000
chr8	47200000	47220000
chr8	47270000	47280000
chr8	48400000	48410000
chr8	48700000	48710000
chr8	48720000	48870000
chr8	53530000	53550000
chr8	54910000	54920000
chr8	62530000	62550000
chr8	62560000	62600000
chr8	66740000	66750000
chr8	66980000	66990000
chr8	67090000	67100000
chr8	67380000	67390000
chr8	67520000	67530000
chr8	74390000	74430000
chr8	74700000	74710000
chr8	74740000	74750000
chr8	76050000	76060000
chr8	79430000	79440000
chr8	80780000	80790000
chr8	80830000	80840000
chr8	80850000	80860000
chr8	80870000	80880000
chr8	80890000	80900000
chr8	85870000	85880000
chr8	86360000	86370000
chr8	90770000	90780000
chr8	95680000	95690000
chr8	95700000	95710000
chr8	96160000	96170000
chr8	99590000	99600000
chr8	99710000	99720000
chr8	99750000	99760000
chr8	100540000	100550000
chr8	101290000	101320000
chr8	101330000	101340000
chr8	101390000	101410000
chr8	101460000	101470000
chr8	101700000	101730000
chr8	102220000	102230000
chr8	102440000	102450000
chr8	102500000	102510000
chr8	103300000	103340000
chr8	103350000	103360000
chr8	103370000	103380000
chr8	105020000	105030000
chr8	105050000	105060000
chr8	105070000	105080000
chr8	105190000	105200000
chr8	107050000	107060000
chr8	107080000	107090000
chr8	109480000	109490000
chr8	110560000	110570000
chr8	113960000	113970000
chr8	117860000	117880000
chr8	118650000	118660000
chr8	119030000	119040000
chr8	119090000	119100000
chr8	120170000	120180000
chr8	123900000	123910000
chr8	124260000	124280000
chr8	124310000	124360000
chr8	124370000	124390000
chr8	124590000	124610000
chr8	124670000	124680000
chr8	126180000	126190000
chr8	126200000	126210000
chr8	126240000	126250000
chr8	130880000	130910000
chr8	130920000	130940000
chr8	131190000	131200000
chr8	131260000	131270000
chr8	131290000	131300000
chr8	131320000	131330000
chr8	132970000	132980000
chr8	133810000	133840000
chr8	133850000	133860000
chr8	135810000	135820000
chr8	141710000	141830000
chr8	141840000	142010000
chr8	142210000	142220000
chr8	143790000	143800000
chr8	143940000	143950000
chr8	143970000	143980000
chr8	144540000	144550000
chr8	144730000	144740000
chr8	144860000	144870000
chr8	145780000	145790000
chr8	145830000	145840000
chr8	145890000	145900000
chr8	145970000	145980000
chr8	146090000	146110000
chr8	146120000	146140000
chr8	146160000	146170000
chr8	146200000	146220000
chr9	240000	250000
chr9	260000	270000
chr9	280000	290000
chr9	300000	320000
chr9	410000	420000
chr9	430000	440000
chr9	480000	570000
chr9	580000	740000
chr9	1060000	1070000
chr9	1090000	1140000
chr9	1150000	1260000
chr9	1270000	1290000
chr9	1300000	1310000
chr9	1320000	1330000
chr9	1340000	1370000
chr9	1420000	1450000
chr9	1470000	1490000
chr9	1500000	1510000
chr9	1530000	1580000
chr9	1590000	1610000
chr9	1640000	1660000
chr9	1670000	1710000
chr9	1720000	1730000
chr9	1740000	1750000
chr9	1760000	1830000
chr9	1880000	1900000
chr9	1930000	1940000
chr9	1950000	1970000
chr9	1980000	2010000
chr9	2020000	2080000
chr9	2160000	2170000
chr9	2220000	2240000
chr9	2250000	2270000
chr9	2300000	2330000
chr9	2340000	2350000
chr9	2370000	2420000
chr9	2430000	2470000
chr9	2480000	2510000
chr9	2520000	2560000
chr9	2570000	2620000
chr9	2630000	2680000
chr9	2700000	2710000
chr9	2720000	2730000
chr9	2750000	2760000
chr9	2770000	2780000
chr9	2800000	2810000
chr9	2820000	2840000
chr9	2910000	2920000
chr9	2940000	2960000
chr9	2970000	3050000
chr9	3060000	3110000
chr9	3120000	3140000
chr9	3150000	3180000
chr9	3190000	3210000
chr9	3220000	3310000
chr9	3320000	3550000
chr9	3560000	3610000
chr9	3630000	3650000
chr9	3670000	3680000
chr9	3800000	3810000
chr9	3820000	3840000
chr9	3850000	3860000
chr9	3870000	3880000
chr9	3890000	4010000
chr9	4020000	4030000
chr9	4040000	4190000
chr9	4200000	4270000
chr9	4290000	4300000
chr9	4440000	4470000
chr9	4520000	4530000
chr9	4540000	4560000
chr9	4820000	4830000
chr9	4840000	4850000
chr9	4900000	4970000
chr9	5000000	5010000
chr9	5060000	5070000
chr9	5120000	5130000
chr9	5150000	5160000
chr9	5190000	5200000
chr9	5240000	5270000
chr9	5310000	5320000
chr9	5330000	5350000
chr9	5460000	5470000
chr9	5540000	5550000
chr9	5630000	5660000
chr9	5670000	5680000
chr9	5690000	5710000
chr9	5740000	5760000
chr9	5770000	5780000
chr9	5930000	5970000
chr9	6150000	6180000
chr9	6190000	6200000
chr9	6220000	6260000
chr9	6470000	6520000
chr9	6890000	6900000
chr9	6940000	6960000
chr9	6970000	6980000
chr9	7940000	7950000
chr9	12780000	12790000
chr9	12800000	12810000
chr9	12820000	12850000
chr9	12860000	12870000
chr9	12890000	12900000
chr9	13210000	13220000
chr9	13230000	13240000
chr9	13700000	13710000
chr9	14130000	14240000
chr9	14250000	14260000
chr9	14270000	14280000
chr9	14610000	14630000
chr9	14650000	14680000
chr9	15460000	15480000
chr9	15930000	15950000
chr9	15970000	15980000
chr9	17220000	17240000
chr9	17250000	17260000
chr9	17300000	17310000
chr9	17970000	17980000
chr9	18390000	18400000
chr9	18440000	18480000
chr9	18490000	18520000
chr9	18530000	18560000
chr9	18570000	18580000
chr9	19290000	19300000
chr9	19350000	19360000
chr9	19370000	19380000
chr9	19620000	19630000
chr9	19640000	19650000
chr9	19690000	19710000
chr9	19720000	19730000
chr9	20120000	20130000
chr9	20740000	20770000
chr9	20780000	20790000
chr9	20800000	20830000
chr9	20850000	20870000
chr9	21270000	21280000
chr9	21320000	21330000
chr9	21340000	21350000
chr9	21540000	21690000
chr9	21700000	21720000
chr9	21750000	21770000
chr9	21780000	21790000
chr9	21830000	21840000
chr9	21860000	21890000
chr9	21900000	21910000
chr9	21980000	21990000
chr9	22000000	22020000
chr9	22030000	22150000
chr9	22160000	22170000
chr9	22210000	22220000
chr9	22240000	22250000
chr9	22320000	22330000
chr9	23010000	23020000
chr9	23590000	23600000
chr9	23620000	23630000
chr9	23660000	23680000
chr9	23690000	23700000
chr9	23710000	23720000
chr9	23740000	23750000
chr9	23760000	23780000
chr9	23800000	23810000
chr9	26130000	26160000
chr9	26200000	26210000
chr9	26280000	26290000
chr9	26830000	26840000
chr9	26910000	26930000
chr9	26960000	26970000
chr9	27420000	27440000
chr9	27490000	27500000
chr9	27510000	27520000
chr9	27530000	27540000
chr9	27840000	27850000
chr9	28210000	28220000
chr9	28260000	28270000
chr9	28900000	28910000
chr9	29000000	29010000
chr9	29030000	29050000
chr9	30040000	30050000
chr9	31140000	31150000
chr9	31170000	31190000
chr9	31200000	31220000
chr9	31230000	31240000
chr9	31270000	31290000
chr9	31300000	31310000
chr9	31550000	31560000
chr9	31620000	31640000
chr9	32000000	32010000
chr9	32430000	32450000
chr9	32680000	32700000
chr9	32710000	32720000
chr9	32740000	32750000
chr9	32760000	32810000
chr9	32840000	32850000
chr9	32890000	32900000
chr9	33050000	33060000
chr9	33080000	33100000
chr9	33150000	33160000
chr9	33170000	33180000
chr9	33190000	33200000
chr9	33210000	33230000
chr9	33260000	33270000
chr9	33340000	33350000
chr9	33360000	33370000
chr9	33500000	33510000
chr9	33630000	33640000
chr9	33650000	33660000
chr9	33680000	33700000
chr9	33710000	33730000
chr9	33740000	33750000
chr9	33800000	33810000
chr9	33850000	33860000
chr9	33880000	33890000
chr9	33940000	33950000
chr9	33960000	33980000
chr9	33990000	34000000
chr9	34200000	34220000
chr9	34430000	34450000
chr9	34750000	34760000
chr9	34770000	34790000
chr9	34800000	34820000
chr9	34840000	34850000
chr9	34860000	34890000
chr9	34900000	34930000
chr9	34960000	34970000
chr9	35220000	35230000
chr9	35240000	35260000
chr9	35270000	35280000
chr9	35300000	35310000
chr9	35320000	35330000
chr9	35420000	35430000
chr9	35870000	35890000
chr9	35970000	35980000
chr9	36040000	36080000
chr9	36330000	36360000
chr9	36380000	36400000
chr9	36630000	36640000
chr9	36670000	36690000
chr9	36950000	36960000
chr9	37080000	37090000
chr9	37120000	37300000
chr9	37310000	37320000
chr9	37330000	37340000
chr9	37580000	37590000
chr9	38460000	38470000
chr9	38500000	38510000
chr9	38530000	38540000
chr9	38750000	38760000
chr9	38770000	38780000
chr9	71370000	71380000
chr9	71430000	71440000
chr9	71800000	71810000
chr9	72140000	72150000
chr9	72300000	72330000
chr9	72340000	72350000
chr9	72360000	72370000
chr9	72590000	72600000
chr9	72630000	72640000
chr9	72710000	72720000
chr9	72930000	72940000
chr9	73530000	73540000
chr9	73630000	73640000
chr9	75060000	75070000
chr9	75580000	75590000
chr9	75630000	75640000
chr9	75660000	75670000
chr9	75700000	75750000
chr9	75760000	75780000
chr9	76030000	76040000
chr9	76380000	76390000
chr9	76400000	76430000
chr9	76440000	76450000
chr9	76500000	76510000
chr9	76620000	76630000
chr9	77610000	77620000
chr9	79550000	79560000
chr9	79590000	79600000
chr9	79830000	79850000
chr9	79890000	79900000
chr9	79910000	79920000
chr9	79930000	79960000
chr9	79980000	79990000
chr9	80520000	80530000
chr9	81600000	81620000
chr9	86720000	86740000
chr9	86770000	86780000
chr9	88200000	88210000
chr9	93090000	93100000
chr9	93110000	93130000
chr9	93170000	93180000
chr9	94970000	95080000
chr9	95140000	95150000
chr9	95160000	95170000
chr9	95190000	95230000
chr9	95250000	95260000
chr9	95290000	95300000
chr9	95340000	95350000
chr9	95460000	95480000
chr9	96550000	96560000
chr9	96800000	96810000
chr9	96820000	96840000
chr9	96850000	96860000
chr9	96930000	96940000
chr9	97590000	97600000
chr9	97620000	97660000
chr9	97710000	97720000
chr9	97760000	97780000
chr9	98690000	98700000
chr9	99560000	99570000
chr9	100230000	100250000
chr9	100600000	100610000
chr9	103740000	103750000
chr9	104310000	104320000
chr9	108070000	108080000
chr9	108110000	108120000
chr9	110060000	110070000
chr9	110080000	110090000
chr9	111700000	111760000
chr9	111800000	111810000
chr9	111840000	111850000
chr9	113170000	113190000
chr9	113530000	113580000
chr9	113610000	113620000
chr9	113630000	113640000
chr9	114460000	114470000
chr9	114520000	114530000
chr9	114630000	114640000
chr9	114670000	114680000
chr9	114690000	114710000
chr9	114960000	115080000
chr9	115360000	115370000
chr9	115390000	115400000
chr9	116600000	116610000
chr9	116650000	116660000
chr9	117990000	118000000
chr9	118010000	118030000
chr9	118190000	118200000
chr9	118440000	118450000
chr9	118460000	118470000
chr9	118770000	118790000
chr9	121370000	121380000
chr9	123450000	123460000
chr9	123870000	123880000
chr9	123920000	123930000
chr9	123950000	123960000
chr9	124120000	124130000
chr9	124160000	124170000
chr9	125000000	125010000
chr9	125030000	125040000
chr9	125070000	125080000
chr9	125350000	125360000
chr9	125400000	125420000
chr9	125450000	125460000
chr9	125670000	125680000
chr9	125700000	125710000
chr9	125720000	125730000
chr9	125740000	125760000
chr9	125770000	125780000
chr9	125790000	125810000
chr9	125910000	125920000
chr9	126550000	126560000
chr9	127300000	127310000
chr9	127370000	127380000
chr9	127410000	127440000
chr9	127450000	127490000
chr9	127510000	127530000
chr9	128510000	128530000
chr9	128610000	128620000
chr9	128660000	128670000
chr9	129760000	129770000
chr9	129800000	129810000
chr9	129830000	129840000
chr9	131340000	131350000
chr9	131610000	131620000
chr9	132680000	132690000
chr9	132710000	132720000
chr9	133720000	133730000
chr9	133740000	133750000
chr9	134050000	134070000
chr9	134320000	134330000
chr9	134560000	134570000
chr9	134800000	134810000
chr9	134830000	134840000
chr9	134850000	134930000
chr9	140010000	140020000
chr9	140610000	140620000
chr9	140890000	140900000
chr9	140920000	140930000
chr10	1080000	1090000
chr10	17080000	17090000
chr10	17130000	17140000
chr10	54230000	54240000
chr10	95130000	95140000
chr10	105750000	105790000
chr10	135290000	135300000
chr11	11950000	11960000
chr11	12820000	12830000
chr11	32960000	32970000
chr11	34780000	34790000
chr11	35090000	35100000
chr11	65200000	65210000
chr11	76630000	76640000
chr11	94440000	94450000
chr12	380000	400000
chr12	4630000	4640000
chr12	5390000	5400000
chr12	6790000	6800000
chr12	9950000	9960000
chr12	10480000	10490000
chr12	10560000	10570000
chr12	11100000	11110000
chr12	11120000	11130000
chr12	11150000	11170000
chr12	11190000	11200000
chr12	12670000	12680000
chr12	12710000	12720000
chr12	14520000	14530000
chr12	14540000	14570000
chr12	14610000	14620000
chr12	15850000	15860000
chr12	15930000	15940000
chr12	25690000	25700000
chr12	27190000	27200000
chr12	27260000	27270000
chr12	27290000	27300000
chr12	27720000	27730000
chr12	27780000	27790000
chr12	28130000	28140000
chr12	28170000	28180000
chr12	28260000	28290000
chr12	34000000	34010000
chr12	34560000	34580000
chr12	34590000	34610000
chr12	34640000	34660000
chr12	34690000	34700000
chr12	34710000	34730000
chr12	38250000	38260000
chr12	38310000	38320000
chr12	46810000	46820000
chr12	46950000	46960000
chr12	47820000	47830000
chr12	48760000	48770000
chr12	48850000	48860000
chr12	49830000	49840000
chr12	49860000	49870000
chr12	49910000	49920000
chr12	51030000	51040000
chr12	52870000	52880000
chr12	53990000	54000000
chr12	54270000	54280000
chr12	55180000	55190000
chr12	55230000	55240000
chr12	55250000	55280000
chr12	55820000	55830000
chr12	57240000	57250000
chr12	62740000	62750000
chr12	62990000	63000000
chr12	65990000	66000000
chr12	66020000	66030000
chr12	66040000	66070000
chr12	66090000	66100000
chr12	66120000	66130000
chr12	66220000	66230000
chr12	69950000	69960000
chr12	72020000	72030000
chr12	75540000	75550000
chr12	76070000	76080000
chr12	76090000	76110000
chr12	76140000	76150000
chr12	76170000	76190000
chr12	76210000	76220000
chr12	80020000	80030000
chr12	85680000	85690000
chr12	109050000	109090000
chr12	109110000	109120000
chr12	109190000	109200000
chr12	110660000	110670000
chr12	111950000	111960000
chr12	118620000	118630000
chr12	122960000	122970000
chr12	122990000	123010000
chr12	123070000	123080000
chr13	20530000	20540000
chr13	20620000	20630000
chr13	27670000	27680000
chr13	27700000	27710000
chr13	27730000	27740000
chr13	28130000	28140000
chr13	41780000	41790000
chr13	45710000	45770000
chr13	45780000	45800000
chr13	45810000	45820000
chr13	48930000	48940000
chr13	49600000	49610000
chr13	52160000	52170000
chr13	77700000	77710000
chr13	77770000	77780000
chr13	80070000	80080000
chr13	80110000	80130000
chr13	97870000	97880000
chr13	97900000	97910000
chr14	20210000	20220000
chr14	20240000	20270000
chr14	20300000	20310000
chr14	20320000	20380000
chr14	20390000	20410000
chr14	20420000	20430000
chr14	20450000	20550000
chr14	20560000	20570000
chr14	20580000	20850000
chr14	20860000	21070000
chr14	21080000	21090000
chr14	21100000	21110000
chr14	21140000	21150000
chr14	21160000	21340000
chr14	21360000	21380000
chr14	21390000	21410000
chr14	21420000	21490000
chr14	21500000	21740000
chr14	21750000	21760000
chr14	21770000	21990000
chr14	22000000	22010000
chr14	22020000	22040000
chr14	22050000	22080000
chr14	22090000	22220000
chr14	22230000	23010000
chr14	23030000	23070000
chr14	23090000	23140000
chr14	23160000	23310000
chr14	23320000	23510000
chr14	23520000	23580000
chr14	23590000	23770000
chr14	23780000	23820000
chr14	23830000	23850000
chr14	23860000	23870000
chr14	23890000	23900000
chr14	23910000	23980000
chr14	24010000	24020000
chr14	24050000	24070000
chr14	24080000	24100000
chr14	24120000	24170000
chr14	24180000	24210000
chr14	24230000	24400000
chr14	24510000	24520000
chr14	24550000	24720000
chr14	24740000	24800000
chr14	24810000	24840000
chr14	24850000	24870000
chr14	24880000	24910000
chr14	24920000	24960000
chr14	24970000	25050000
chr14	25060000	25100000
chr14	25110000	25160000
chr14	25180000	25190000
chr14	25240000	25270000
chr14	25290000	25510000
chr14	25520000	25570000
chr14	25580000	25600000
chr14	25610000	25630000
chr14	25640000	25650000
chr14	25660000	25700000
chr14	25710000	25720000
chr14	25740000	25750000
chr14	25760000	25830000
chr14	25840000	25850000
chr14	25880000	25890000
chr14	25900000	25910000
chr14	25930000	25940000
chr14	25950000	25980000
chr14	26020000	26070000
chr14	26080000	26090000
chr14	26100000	26140000
chr14	26160000	26180000
chr14	26190000	26200000
chr14	26220000	26240000
chr14	26250000	26520000
chr14	26530000	26600000
chr14	26620000	26630000
chr14	26640000	26660000
chr14	26680000	26720000
chr14	26740000	26770000
chr14	26780000	26800000
chr14	26830000	26840000
chr14	26850000	26860000
chr14	26900000	26930000
chr14	26940000	26950000
chr14	26970000	27000000
chr14	27010000	27030000
chr14	27040000	27090000
chr14	27100000	27400000
chr14	27440000	27450000
chr14	27480000	27490000
chr14	27510000	27550000
chr14	27570000	27580000
chr14	27600000	27620000
chr14	27650000	27750000
chr14	27770000	27830000
chr14	27840000	27890000
chr14	27910000	27930000
chr14	27940000	27960000
chr14	28020000	28040000
chr14	28050000	28070000
chr14	28080000	28180000
chr14	28190000	28220000
chr14	28330000	28420000
chr14	28430000	28470000
chr14	28490000	28580000
chr14	28600000	28620000
chr14	28630000	28640000
chr14	28650000	28740000
chr14	28750000	29070000
chr14	29090000	29100000
chr14	29120000	29150000
chr14	29160000	29200000
chr14	29330000	29540000
chr14	29550000	29870000
chr14	29880000	29900000
chr14	29910000	29950000
chr14	30130000	30140000
chr14	30150000	30200000
chr14	30210000	30390000
chr14	30400000	30420000
chr14	30430000	30450000
chr14	30460000	30470000
chr14	30490000	30510000
chr14	30520000	30570000
chr14	30580000	30590000
chr14	30600000	30630000
chr14	30640000	30670000
chr14	30710000	30760000
chr14	30770000	30800000
chr14	30810000	30870000
chr14	30910000	30960000
chr14	30970000	31130000
chr14	31140000	31210000
chr14	31230000	31280000
chr14	31310000	31340000
chr14	31350000	31720000
chr14	31730000	31830000
chr14	31860000	31870000
chr14	32010000	32040000
chr14	32050000	32100000
chr14	32110000	32170000
chr14	32180000	32270000
chr14	32280000	32580000
chr14	32590000	32630000
chr14	32640000	32650000
chr14	32660000	32670000
chr14	32740000	32760000
chr14	32770000	32940000
chr14	32960000	32970000
chr14	33100000	33130000
chr14	33140000	33150000
chr14	33170000	33320000
chr14	33330000	33400000
chr14	33410000	33460000
chr14	33470000	33490000
chr14	33500000	33540000
chr14	33550000	33580000
chr14	33590000	33760000
chr14	33770000	33790000
chr14	33800000	33820000
chr14	33830000	33920000
chr14	33930000	34220000
chr14	34340000	34610000
chr14	34620000	34770000
chr14	34860000	35000000
chr14	35040000	35050000
chr14	35060000	35110000
chr14	35130000	35200000
chr14	35210000	35360000
chr14	35370000	35390000
chr14	35400000	35500000
chr14	35510000	35640000
chr14	35650000	35800000
chr14	35820000	35830000
chr14	35840000	35850000
chr14	35920000	35930000
chr14	35940000	36260000
chr14	36300000	36310000
chr14	36320000	36450000
chr14	36460000	36590000
chr14	36600000	36620000
chr14	36630000	36710000
chr14	36720000	36880000
chr14	36890000	36970000
chr14	37000000	37040000
chr14	37060000	37080000
chr14	37100000	37110000
chr14	37140000	37160000
chr14	37170000	37360000
chr14	37370000	37600000
chr14	37610000	37620000
chr14	37720000	37730000
chr14	37740000	37750000
chr14	37770000	37820000
chr14	37830000	37970000
chr14	37980000	38050000
chr14	38080000	38250000
chr14	38260000	38310000
chr14	38320000	38330000
chr14	38350000	38360000
chr14	38420000	38440000
chr14	38450000	38480000
chr14	38490000	38670000
chr14	38680000	38720000
chr14	38730000	39010000
chr14	39020000	39080000
chr14	39090000	39110000
chr14	39120000	39140000
chr14	39150000	39230000
chr14	39240000	39300000
chr14	39310000	39330000
chr14	39340000	39390000
chr14	39400000	39410000
chr14	39430000	39450000
chr14	39490000	39510000
chr14	39530000	39540000
chr14	39560000	39570000
chr14	39580000	39610000
chr14	39620000	39820000
chr14	39830000	39880000
chr14	39990000	40000000
chr14	40020000	40030000
chr14	40040000	40050000
chr14	40090000	40100000
chr14	40110000	40130000
chr14	40140000	40230000
chr14	40240000	40250000
chr14	40260000	40290000
chr14	40300000	40330000
chr14	40370000	40380000
chr14	40390000	40420000
chr14	40440000	40450000
chr14	40480000	40490000
chr14	40520000	40550000
chr14	40560000	40570000
chr14	40600000	40620000
chr14	40630000	40670000
chr14	40700000	40750000
chr14	40760000	40770000
chr14	40790000	40800000
chr14	40810000	40850000
chr14	40860000	40870000
chr14	40880000	40930000
chr14	40950000	40970000
chr14	40980000	41040000
chr14	41050000	41090000
chr14	41110000	41120000
chr14	41130000	41160000
chr14	41170000	41180000
chr14	41210000	41250000
chr14	41260000	41270000
chr14	41280000	41300000
chr14	41310000	41320000
chr14	41340000	41360000
chr14	41380000	41390000
chr14	41400000	41420000
chr14	41430000	41440000
chr14	41450000	41460000
chr14	41480000	41510000
chr14	41520000	41530000
chr14	41540000	41560000
chr14	41580000	41590000
chr14	41610000	41620000
chr14	41630000	41650000
chr14	41660000	41680000
chr14	41690000	41700000
chr14	41710000	41720000
chr14	41740000	41760000
chr14	41770000	41780000
chr14	41820000	41850000
chr14	41860000	41870000
chr14	41900000	41930000
chr14	41940000	41970000
chr14	41990000	42010000
chr14	42050000	42060000
chr14	42090000	42100000
chr14	42160000	42170000
chr14	42180000	42190000
chr14	42200000	42210000
chr14	42240000	42270000
chr14	42280000	42300000
chr14	42310000	42330000
chr14	42360000	42370000
chr14	42380000	42430000
chr14	42440000	42450000
chr14	42460000	42480000
chr14	42500000	42510000
chr14	42540000	42560000
chr14	42570000	42740000
chr14	42760000	42790000
chr14	42800000	42820000
chr14	42840000	42910000
chr14	42940000	42950000
chr14	42960000	42970000
chr14	42980000	43000000
chr14	43060000	43070000
chr14	43090000	43120000
chr14	43140000	43160000
chr14	43190000	43220000
chr14	43230000	43250000
chr14	43350000	43360000
chr14	43400000	43410000
chr14	43420000	43450000
chr14	43500000	43520000
chr14	43530000	43550000
chr14	43570000	43600000
chr14	43610000	43630000
chr14	43670000	43680000
chr14	43690000	43700000
chr14	43710000	43720000
chr14	43730000	43750000
chr14	43760000	43780000
chr14	43820000	43830000
chr14	43840000	43870000
chr14	43890000	43900000
chr14	43910000	43920000
chr14	43930000	43940000
chr14	43950000	43960000
chr14	43970000	43980000
chr14	43990000	44000000
chr14	44020000	44030000
chr14	44070000	44080000
chr14	44090000	44100000
chr14	44140000	44160000
chr14	44170000	44180000
chr14	44210000	44220000
chr14	44230000	44250000
chr14	44260000	44270000
chr14	44360000	44380000
chr14	44390000	44400000
chr14	44470000	44500000
chr14	44510000	44540000
chr14	44560000	44570000
chr14	44580000	44610000
chr14	44660000	44670000
chr14	44710000	44740000
chr14	44750000	44780000
chr14	44790000	44850000
chr14	44860000	44880000
chr14	44890000	44900000
chr14	44930000	44940000
chr14	44950000	44980000
chr14	45000000	45010000
chr14	45030000	45040000
chr14	45050000	45060000
chr14	45080000	45100000
chr14	45110000	45120000
chr14	45140000	45160000
chr14	45170000	45180000
chr14	45390000	45710000
chr14	45840000	45850000
chr14	45860000	45870000
chr14	45930000	45940000
chr14	45970000	46000000
chr14	46010000	46020000
chr14	46040000	46100000
chr14	46110000	46180000
chr14	46190000	46230000
chr14	46240000	46260000
chr14	46270000	46280000
chr14	46310000	46330000
chr14	46360000	46380000
chr14	46390000	46400000
chr14	46410000	46440000
chr14	46450000	46460000
chr14	46490000	46560000
chr14	46580000	46690000
chr14	46700000	46720000
chr14	46730000	46750000
chr14	46760000	46790000
chr14	46810000	46830000
chr14	46880000	46890000
chr14	46910000	46950000
chr14	46980000	47000000
chr14	47030000	47040000
chr14	47080000	47100000
chr14	47130000	47140000
chr14	47150000	47160000
chr14	47170000	47180000
chr14	47190000	47200000
chr14	47210000	47270000
chr14	47280000	47310000
chr14	47330000	47370000
chr14	47380000	47400000
chr14	47410000	47430000
chr14	47440000	47450000
chr14	47470000	47500000
chr14	47510000	47540000
chr14	47560000	47570000
chr14	47600000	47610000
chr14	47650000	47660000
chr14	47670000	47690000
chr14	47730000	47740000
chr14	47750000	47760000
chr14	47790000	47810000
chr14	47860000	47870000
chr14	47890000	47900000
chr14	47950000	47960000
chr14	48050000	48060000
chr14	48100000	48120000
chr14	48150000	48170000
chr14	48180000	48190000
chr14	48200000	48210000
chr14	48260000	48270000
chr14	48370000	48380000
chr14	48390000	48400000
chr14	48410000	48440000
chr14	48460000	48500000
chr14	48510000	48520000
chr14	48530000	48550000
chr14	48560000	48570000
chr14	48590000	48610000
chr14	48620000	48650000
chr14	48660000	48720000
chr14	48740000	48750000
chr14	48760000	48830000
chr14	48840000	48860000
chr14	48920000	48940000
chr14	48980000	49020000
chr14	49050000	49060000
chr14	49080000	49140000
chr14	49180000	49200000
chr14	49220000	49240000
chr14	49250000	49300000
chr14	49310000	49390000
chr14	49400000	49490000
chr14	49510000	49570000
chr14	49680000	49690000
chr14	49720000	49730000
chr14	49740000	49760000
chr14	49770000	49820000
chr14	49830000	49970000
chr14	49980000	50000000
chr14	50070000	50320000
chr14	50330000	50610000
chr14	50620000	51340000
chr14	51370000	51410000
chr14	51430000	51440000
chr14	51450000	51670000
chr14	51680000	51700000
chr14	51730000	51740000
chr14	51750000	51880000
chr14	51890000	52200000
chr14	52250000	52260000
chr14	52270000	52280000
chr14	52300000	52320000
chr14	52330000	52580000
chr14	52590000	52620000
chr14	52630000	52640000
chr14	52650000	52660000
chr14	52680000	52710000
chr14	52720000	52730000
chr14	52740000	53010000
chr14	53020000	53030000
chr14	53040000	53060000
chr14	53070000	53460000
chr14	53490000	53550000
chr14	53560000	53590000
chr14	53600000	53610000
chr14	53630000	53660000
chr14	53670000	53780000
chr14	53810000	53820000
chr14	53830000	53890000
chr14	53900000	54020000
chr14	54030000	54070000
chr14	54090000	54300000
chr14	54310000	54390000
chr14	54400000	54410000
chr14	54440000	54490000
chr14	54500000	54740000
chr14	54750000	54770000
chr14	54890000	54910000
chr14	54940000	54960000
chr14	54970000	54980000
chr14	54990000	55220000
chr14	55230000	55240000
chr14	55260000	55360000
chr14	55370000	55930000
chr14	55940000	55960000
chr14	55970000	56160000
chr14	56190000	56200000
chr14	56250000	56270000
chr14	56280000	56460000
chr14	56470000	56580000
chr14	56590000	56690000
chr14	56700000	56790000
chr14	56800000	56880000
chr14	56900000	56910000
chr14	57040000	57100000
chr14	57110000	57120000
chr14	57130000	57140000
chr14	57150000	57170000
chr14	57180000	57270000
chr14	57280000	57520000
chr14	57530000	57570000
chr14	57580000	57620000
chr14	57630000	57890000
chr14	57900000	57930000
chr14	57970000	57980000
chr14	57990000	58130000
chr14	58140000	58200000
chr14	58210000	58500000
chr14	58510000	58600000
chr14	58620000	58910000
chr14	58920000	58940000
chr14	58950000	58960000
chr14	58970000	58990000
chr14	59000000	59030000
chr14	59040000	59050000
chr14	59110000	59400000
chr14	59410000	59450000
chr14	59460000	59470000
chr14	59510000	59520000
chr14	59580000	59590000
chr14	59620000	59630000
chr14	59650000	59870000
chr14	59880000	59890000
chr14	59900000	59910000
chr14	59960000	59970000
chr14	59990000	60000000
chr14	60020000	60030000
chr14	60050000	60060000
chr14	60110000	60120000
chr14	60140000	60190000
chr14	60200000	60360000
chr14	60390000	60420000
chr14	60430000	60500000
chr14	60510000	60670000
chr14	60690000	60710000
chr14	60720000	60780000
chr14	60810000	60840000
chr14	60860000	60890000
chr14	60900000	60910000
chr14	60920000	60970000
chr14	61000000	61030000
chr14	61160000	61400000
chr14	61410000	61470000
chr14	61480000	61560000
chr14	61570000	61590000
chr14	61610000	61640000
chr14	61660000	61670000
chr14	61760000	61780000
chr14	61790000	61870000
chr14	61890000	61920000
chr14	61930000	62220000
chr14	62250000	62260000
chr14	62330000	62340000
chr14	62380000	62510000
chr14	62520000	62550000
chr14	62560000	62580000
chr14	62660000	62670000
chr14	62680000	62690000
chr14	62700000	62710000
chr14	62730000	62840000
chr14	62860000	62890000
chr14	62910000	63030000
chr14	63040000	63090000
chr14	63100000	63210000
chr14	63220000	63370000
chr14	63380000	63410000
chr14	63430000	63510000
chr14	63540000	63550000
chr14	63570000	63590000
chr14	63610000	63620000
chr14	63630000	63680000
chr14	63830000	63840000
chr14	63860000	64040000
chr14	64050000	64070000
chr14	64090000	64110000
chr14	64130000	64150000
chr14	64160000	64190000
chr14	64270000	64280000
chr14	64330000	64340000
chr14	64350000	64390000
chr14	64400000	64470000
chr14	64480000	64750000
chr14	64790000	64820000
chr14	64860000	65230000
chr14	65240000	65410000
chr14	65440000	65510000
chr14	65520000	65530000
chr14	65550000	65560000
chr14	65640000	65650000
chr14	65660000	65840000
chr14	65880000	66230000
chr14	66240000	66250000
chr14	66320000	66330000
chr14	66340000	66360000
chr14	66380000	66390000
chr14	66400000	66410000
chr14	66430000	66440000
chr14	66450000	66460000
chr14	66470000	66480000
chr14	66500000	66540000
chr14	66550000	66560000
chr14	66580000	66640000
chr14	66660000	66680000
chr14	66710000	66760000
chr14	66790000	66800000
chr14	66810000	66830000
chr14	66860000	66970000
chr14	66980000	67080000
chr14	67090000	67160000
chr14	67170000	67510000
chr14	67520000	67530000
chr14	67540000	67600000
chr14	67610000	67640000
chr14	67650000	67870000
chr14	67880000	67930000
chr14	67960000	68280000
chr14	68290000	68310000
chr14	68320000	68700000
chr14	68710000	68740000
chr14	68770000	68810000
chr14	68830000	68970000
chr14	68980000	69120000
chr14	69130000	69150000
chr14	69160000	69200000
chr14	69360000	69440000
chr14	69450000	69640000
chr14	69660000	69720000
chr14	69740000	69780000
chr14	69830000	69860000
chr14	69870000	69880000
chr14	69890000	69930000
chr14	69970000	69980000
chr14	70040000	70230000
chr14	70240000	70260000
chr14	70300000	70310000
chr14	70330000	70340000
chr14	70350000	70390000
chr14	70400000	70490000
chr14	70500000	70530000
chr14	70550000	70580000
chr14	70600000	70610000
chr14	70640000	70650000
chr14	70660000	70700000
chr14	70720000	70730000
chr14	70750000	70760000
chr14	70780000	70790000
chr14	70800000	70810000
chr14	70830000	70880000
chr14	70890000	70900000
chr14	70910000	70920000
chr14	70950000	70960000
chr14	70970000	71100000
chr14	71110000	71130000
chr14	71140000	71150000
chr14	71170000	71400000
chr14	71410000	71540000
chr14	71570000	71580000
chr14	71720000	72080000
chr14	72090000	72140000
chr14	72150000	72170000
chr14	72250000	72260000
chr14	72300000	72330000
chr14	72390000	72400000
chr14	72410000	72420000
chr14	72430000	72450000
chr14	72500000	72550000
chr14	72570000	72600000
chr14	72610000	72660000
chr14	72670000	72690000
chr14	72700000	72730000
chr14	72740000	72790000
chr14	72830000	72870000
chr14	73020000	73030000
chr14	73040000	73300000
chr14	73310000	73330000
chr14	73350000	73390000
chr14	73520000	73690000
chr14	73740000	73940000
chr14	73970000	73980000
chr14	74090000	74140000
chr14	74150000	74410000
chr14	74420000	74480000
chr14	74490000	74550000
chr14	74560000	74680000
chr14	74690000	74700000
chr14	74710000	74730000
chr14	74770000	74790000
chr14	74800000	74820000
chr14	74840000	74860000
chr14	74890000	74970000
chr14	75000000	75010000
chr14	75020000	75030000
chr14	75050000	75060000
chr14	75070000	75370000
chr14	75380000	75440000
chr14	75450000	75660000
chr14	75670000	75690000
chr14	75700000	75810000
chr14	75820000	75830000
chr14	75840000	75860000
chr14	75870000	75890000
chr14	75910000	75920000
chr14	75930000	76000000
chr14	76050000	76070000
chr14	76130000	76160000
chr14	76170000	76420000
chr14	76460000	76470000
chr14	76480000	76500000
chr14	76620000	76730000
chr14	76740000	76760000
chr14	76980000	76990000
chr14	77040000	77050000
chr14	77070000	77090000
chr14	77200000	77210000
chr14	77350000	77400000
chr14	77410000	77450000
chr14	77460000	77570000
chr14	77630000	77640000
chr14	77750000	77780000
chr14	77800000	77810000
chr14	77820000	77840000
chr14	77860000	77870000
chr14	77890000	77920000
chr14	77930000	77940000
chr14	77970000	78100000
chr14	78140000	78150000
chr14	78160000	78200000
chr14	78210000	78230000
chr14	78510000	78520000
chr14	78530000	78540000
chr14	78580000	78590000
chr14	78600000	78640000
chr14	78670000	78690000
chr14	78700000	78710000
chr14	78720000	78750000
chr14	78760000	78780000
chr14	78790000	78810000
chr14	78820000	78850000
chr14	78940000	78950000
chr14	78970000	78990000
chr14	79010000	79030000
chr14	79040000	79050000
chr14	79070000	79080000
chr14	79100000	79110000
chr14	79120000	79160000
chr14	79500000	79520000
chr14	79530000	79690000
chr14	79700000	79720000
chr14	79730000	79740000
chr14	79760000	79770000
chr14	79810000	79820000
chr14	79830000	79840000
chr14	79860000	79900000
chr14	79910000	79930000
chr14	79950000	79960000
chr14	79980000	79990000
chr14	80000000	80010000
chr14	80020000	80030000
chr14	80050000	80060000
chr14	80080000	80170000
chr14	80230000	80240000
chr14	80270000	80280000
chr14	80300000	80310000
chr14	80370000	80380000
chr14	80400000	80420000
chr14	80470000	80480000
chr14	80520000	80550000
chr14	80590000	80600000
chr14	80610000	80620000
chr14	80630000	80640000
chr14	80660000	80670000
chr14	80710000	80720000
chr14	80730000	80770000
chr14	80790000	80800000
chr14	80810000	80840000
chr14	80860000	80930000
chr14	80950000	80980000
chr14	80990000	81250000
chr14	81350000	81360000
chr14	81460000	81480000
chr14	81490000	81540000
chr14	81580000	81590000
chr14	81610000	81620000
chr14	81640000	81670000
chr14	81730000	81930000
chr14	82190000	82240000
chr14	82260000	82270000
chr14	82290000	82300000
chr14	82400000	82410000
chr14	82540000	82570000
chr14	82580000	82600000
chr14	82610000	82620000
chr14	82630000	82650000
chr14	82660000	82690000
chr14	82710000	82730000
chr14	82750000	82760000
chr14	82770000	82780000
chr14	82790000	82810000
chr14	82820000	82830000
chr14	82840000	82850000
chr14	82870000	82880000
chr14	82900000	82920000
chr14	82940000	82950000
chr14	82960000	82970000
chr14	82980000	82990000
chr14	83020000	83030000
chr14	83040000	83110000
chr14	83120000	83130000
chr14	83140000	83170000
chr14	83180000	83200000
chr14	83210000	83220000
chr14	83300000	83320000
chr14	83330000	83340000
chr14	83360000	83390000
chr14	83430000	83440000
chr14	83480000	83500000
chr14	83580000	83590000
chr14	83620000	83630000
chr14	83720000	83730000
chr14	83810000	83820000
chr14	83830000	83870000
chr14	83880000	83890000
chr14	83900000	83910000
chr14	83930000	83960000
chr14	84020000	84040000
chr14	84060000	84070000
chr14	84100000	84110000
chr14	84120000	84140000
chr14	84150000	84190000
chr14	84200000	84230000
chr14	84240000	84250000
chr14	84360000	84370000
chr14	84380000	84390000
chr14	84520000	84530000
chr14	84590000	84610000
chr14	84710000	84730000
chr14	84820000	84830000
chr14	84850000	84860000
chr14	84870000	84910000
chr14	84920000	84930000
chr14	84980000	84990000
chr14	85000000	85010000
chr14	85150000	85160000
chr14	85170000	85180000
chr14	85240000	85250000
chr14	85260000	85270000
chr14	85320000	85330000
chr14	85340000	85350000
chr14	85560000	85570000
chr14	85590000	85600000
chr14	85620000	85650000
chr14	85660000	85770000
chr14	85780000	85950000
chr14	86300000	86310000
chr14	86320000	86340000
chr14	86350000	86380000
chr14	86410000	86420000
chr14	86470000	86480000
chr14	86650000	86660000
chr14	86680000	86690000
chr14	86700000	86730000
chr14	86740000	86770000
chr14	86780000	86820000
chr14	86840000	86850000
chr14	86870000	86880000
chr14	86900000	86980000
chr14	86990000	87120000
chr14	87130000	87200000
chr14	87210000	87280000
chr14	87300000	87310000
chr14	87420000	87430000
chr14	87470000	87480000
chr14	87500000	87530000
chr14	87540000	87550000
chr14	87560000	87590000
chr14	87600000	87610000
chr14	87630000	87640000
chr14	87650000	87700000
chr14	87710000	87720000
chr14	87730000	87820000
chr14	87830000	87880000
chr14	87900000	88040000
chr14	88210000	88220000
chr14	88250000	88280000
chr14	88290000	88310000
chr14	88320000	88330000
chr14	88360000	88370000
chr14	88410000	88420000
chr14	88430000	88440000
chr14	88470000	88480000
chr14	88490000	88590000
chr14	88630000	88650000
chr14	88690000	88720000
chr14	88760000	88780000
chr14	88800000	88820000
chr14	88830000	88850000
chr14	88860000	88870000
chr14	88890000	88900000
chr14	88910000	88920000
chr14	88980000	89000000
chr14	89030000	89050000
chr14	89060000	89240000
chr14	89250000	89380000
chr14	89630000	89640000
chr14	90060000	90070000
chr14	90160000	90170000
chr14	90190000	90200000
chr14	90210000	90230000
chr14	90250000	90260000
chr14	90270000	90280000
chr14	90290000	90300000
chr14	90310000	90330000
chr14	90410000	90420000
chr14	90450000	90460000
chr14	90500000	90510000
chr14	90520000	90530000
chr14	90550000	90560000
chr14	90760000	90770000
chr14	90830000	90840000
chr14	90850000	90880000
chr14	90930000	90950000
chr14	90990000	91000000
chr14	91060000	91080000
chr14	91100000	91110000
chr14	91130000	91140000
chr14	91150000	91180000
chr14	91330000	91540000
chr14	91550000	91560000
chr14	91640000	91650000
chr14	91690000	91710000
chr14	91750000	91760000
chr14	91880000	91890000
chr14	91910000	91960000
chr14	92050000	92080000
chr14	92090000	92310000
chr14	92430000	92490000
chr14	92520000	92530000
chr14	92600000	92640000
chr14	92810000	92820000
chr14	92860000	92870000
chr14	92890000	92900000
chr14	92930000	92980000
chr14	93000000	93020000
chr14	93030000	93090000
chr14	93180000	93190000
chr14	93240000	93260000
chr14	93270000	93280000
[truncated: 1,587 more rows]

## Sheet: NP-69
Supplementary Table S6: FIREs called by FIREcaller from HiC libraries
chr	Start	End
chr1	1770000	1780000
chr1	8100000	8110000
chr1	8150000	8170000
chr1	8180000	8200000
chr1	8210000	8220000
chr1	8230000	8250000
chr1	8600000	8610000
chr1	8620000	8650000
chr1	8680000	8690000
chr1	8740000	8750000
chr1	16170000	16180000
chr1	16190000	16210000
chr1	16230000	16250000
chr1	21220000	21230000
chr1	21240000	21250000
chr1	21260000	21270000
chr1	21280000	21290000
chr1	21300000	21340000
chr1	21350000	21430000
chr1	23360000	23380000
chr1	23400000	23410000
chr1	23420000	23430000
chr1	23450000	23460000
chr1	23490000	23500000
chr1	23610000	23620000
chr1	23630000	23650000
chr1	23660000	23670000
chr1	24590000	24600000
chr1	24640000	24650000
chr1	24710000	24720000
chr1	25090000	25100000
chr1	25150000	25170000
chr1	27000000	27030000
chr1	27050000	27060000
chr1	27110000	27120000
chr1	28730000	28750000
chr1	28760000	28770000
chr1	31440000	31450000
chr1	31460000	31470000
chr1	31480000	31500000
chr1	33470000	33480000
chr1	36750000	36760000
chr1	39720000	39730000
chr1	39890000	39900000
chr1	40660000	40670000
chr1	42710000	42720000
chr1	43580000	43590000
chr1	44230000	44240000
chr1	52150000	52160000
chr1	52200000	52210000
chr1	68130000	68140000
chr1	94010000	94020000
chr1	94200000	94210000
chr1	94240000	94250000
chr1	94270000	94280000
chr1	94640000	94720000
chr1	95100000	95110000
chr1	95120000	95130000
chr1	113440000	113450000
chr1	114040000	114050000
chr1	117470000	117480000
chr1	120310000	120320000
chr1	145590000	145600000
chr1	145620000	145630000
chr1	145650000	145660000
chr1	147070000	147080000
chr1	147170000	147180000
chr1	147200000	147210000
chr1	149990000	150010000
chr1	150020000	150070000
chr1	150090000	150100000
chr1	150600000	150610000
chr1	150660000	150690000
chr1	150700000	150710000
chr1	151410000	151420000
chr1	151540000	151550000
chr1	151590000	151620000
chr1	151630000	151660000
chr1	151900000	151920000
chr1	151930000	151940000
chr1	152960000	152970000
chr1	152980000	152990000
chr1	153050000	153060000
chr1	153070000	153080000
chr1	153540000	153550000
chr1	155360000	155370000
chr1	155430000	155440000
chr1	155460000	155480000
chr1	156410000	156430000
chr1	156690000	156700000
chr1	163040000	163050000
chr1	172550000	172560000
chr1	172930000	172950000
chr1	172970000	172980000
chr1	174810000	174820000
chr1	178070000	178080000
chr1	178090000	178100000
chr1	178130000	178140000
chr1	178280000	178290000
chr1	179170000	179180000
chr1	182990000	183000000
chr1	183100000	183110000
chr1	200710000	200720000
chr1	200740000	200750000
chr1	200760000	200770000
chr1	201210000	201220000
chr1	205680000	205690000
chr1	207040000	207050000
chr1	207080000	207090000
chr1	207410000	207420000
chr1	207440000	207450000
chr1	207470000	207480000
chr1	207490000	207500000
chr1	207510000	207520000
chr1	209850000	209870000
chr1	209880000	209890000
chr1	210110000	210120000
chr1	210160000	210170000
chr1	212760000	212770000
chr1	214570000	214580000
chr1	214610000	214630000
chr1	214640000	214660000
chr1	214670000	214690000
chr1	214710000	214720000
chr1	223040000	223050000
chr1	224120000	224130000
chr1	225830000	225840000
chr1	227840000	227850000
chr1	235380000	235390000
chr1	235410000	235420000
chr1	235470000	235480000
chr1	235890000	235900000
chr3	98700000	98710000
chr3	185530000	185540000
chr4	150000	160000
chr4	170000	180000
chr4	230000	280000
chr4	290000	300000
chr4	11560000	11570000
chr4	39070000	39080000
chr4	41100000	41110000
chr4	48680000	48690000
chr4	48770000	48780000
chr4	75400000	75410000
chr5	110000	190000
chr5	200000	210000
chr5	220000	230000
chr5	280000	290000
chr5	320000	370000
chr5	380000	470000
chr5	550000	580000
chr5	590000	600000
chr5	650000	660000
chr5	920000	930000
chr5	970000	990000
chr5	1040000	1050000
chr5	1300000	1310000
chr5	1450000	1460000
chr5	1470000	1480000
chr5	1530000	1540000
chr5	1560000	1570000
chr5	1810000	1820000
chr5	1840000	1850000
chr5	1900000	1910000
chr5	1930000	1950000
chr5	1960000	2000000
chr5	2080000	2090000
chr5	2590000	2600000
chr5	2650000	2660000
chr5	2680000	2690000
chr5	2760000	2780000
chr5	2790000	2800000
chr5	3290000	3300000
chr5	3700000	3710000
chr5	4070000	4080000
chr5	4380000	4390000
chr5	4400000	4410000
chr5	4450000	4460000
chr5	5100000	5110000
chr5	5150000	5170000
chr5	5190000	5260000
chr5	5280000	5300000
chr5	6170000	6180000
chr5	6690000	6700000
chr5	8800000	8810000
chr5	8850000	8860000
chr5	8880000	8890000
chr5	8910000	9000000
chr5	9010000	9020000
chr5	9030000	9040000
chr5	9070000	9080000
chr5	9100000	9110000
chr5	9360000	9370000
chr5	9410000	9420000
chr5	9660000	9670000
chr5	9900000	9910000
chr5	9950000	9970000
chr5	9980000	9990000
chr5	10020000	10030000
chr5	10280000	10290000
chr5	10300000	10310000
chr5	10340000	10440000
chr5	10450000	10480000
chr5	10490000	10630000
chr5	12490000	12500000
chr5	14010000	14040000
chr5	14060000	14290000
chr5	14340000	14350000
chr5	14370000	14410000
chr5	14420000	14480000
chr5	14800000	14840000
chr5	14860000	14880000
chr5	14900000	14910000
chr5	14920000	14950000
chr5	16490000	16500000
chr5	16540000	16560000
chr5	16790000	16800000
chr5	16810000	16940000
chr5	16950000	16970000
chr5	16980000	17030000
chr5	17050000	17060000
chr5	17070000	17080000
chr5	17090000	17100000
chr5	17250000	17280000
chr5	17320000	17330000
chr5	17780000	17790000
chr5	17800000	17820000
chr5	17830000	17860000
chr5	17870000	17880000
chr5	17910000	17940000
chr5	17950000	17980000
chr5	17990000	18030000
chr5	18050000	18060000
chr5	18090000	18100000
chr5	18130000	18150000
chr5	18180000	18190000
chr5	18200000	18210000
chr5	18230000	18240000
chr5	18480000	18490000
chr5	18500000	18530000
chr5	18560000	18630000
chr5	18920000	18940000
chr5	19060000	19070000
chr5	19100000	19110000
chr5	19150000	19170000
chr5	19330000	19340000
chr5	19370000	19380000
chr5	19420000	19430000
chr5	19450000	19460000
chr5	19470000	19480000
chr5	19490000	19500000
chr5	19880000	19900000
chr5	19930000	19940000
chr5	20280000	20290000
chr5	21080000	21090000
chr5	21120000	21130000
chr5	21150000	21240000
chr5	21560000	21570000
chr5	21630000	21660000
chr5	21680000	21700000
chr5	21730000	21760000
chr5	22530000	22570000
chr5	22620000	22630000
chr5	22640000	22680000
chr5	23280000	23290000
chr5	23330000	23360000
chr5	23380000	23410000
chr5	23430000	23500000
chr5	23530000	23550000
chr5	23560000	23570000
chr5	23580000	23610000
chr5	23620000	23630000
chr5	23650000	23670000
chr5	23730000	23740000
chr5	23890000	23900000
chr5	24040000	24050000
chr5	24130000	24140000
chr5	24180000	24190000
chr5	24370000	24380000
chr5	24830000	24840000
chr5	24870000	24880000
chr5	24910000	24920000
chr5	25060000	25070000
chr5	27220000	27230000
chr5	27240000	27280000
chr5	27300000	27350000
chr5	27380000	27390000
chr5	27400000	27410000
chr5	27450000	27460000
chr5	27730000	27740000
chr5	27950000	27960000
chr5	28150000	28160000
chr5	28580000	28590000
chr5	29240000	29250000
chr5	29320000	29330000
chr5	29630000	29640000
chr5	29740000	29750000
chr5	30090000	30100000
chr5	30250000	30260000
chr5	30450000	30460000
chr5	30520000	30540000
chr5	30580000	30590000
chr5	30630000	30640000
chr5	30720000	30730000
chr5	30920000	30930000
chr5	31020000	31050000
chr5	31060000	31070000
chr5	31460000	31470000
chr5	31820000	31830000
chr5	31840000	31850000
chr5	31870000	32010000
chr5	32020000	32070000
chr5	32140000	32160000
chr5	32180000	32190000
chr5	32230000	32290000
chr5	32300000	32310000
chr5	32330000	32440000
chr5	32750000	32760000
chr5	32810000	32830000
chr5	32850000	32900000
chr5	32910000	32930000
chr5	32960000	33100000
chr5	33110000	33190000
chr5	33230000	33320000
chr5	33330000	33350000
chr5	33650000	33660000
chr5	33680000	33690000
chr5	33700000	33720000
chr5	33740000	33760000
chr5	33770000	33790000
chr5	33810000	33830000
chr5	34520000	34540000
chr5	34550000	34640000
chr5	34650000	34750000
chr5	34770000	34800000
chr5	34810000	34830000
chr5	35140000	35150000
chr5	35200000	35210000
chr5	35280000	35300000
chr5	35380000	35390000
chr5	35430000	35440000
chr5	35480000	35500000
chr5	35640000	35650000
chr5	35680000	35690000
chr5	35720000	35730000
chr5	35740000	35820000
chr5	35830000	35870000
chr5	35880000	35890000
chr5	36100000	36110000
chr5	36130000	36140000
chr5	36170000	36180000
chr5	36190000	36210000
chr5	36220000	36240000
chr5	36250000	36290000
chr5	36300000	36330000
chr5	36360000	36370000
chr5	36390000	36470000
chr5	36480000	36510000
chr5	36520000	36630000
chr5	36640000	36660000
chr5	36670000	36680000
chr5	36790000	36800000
chr5	36810000	37080000
chr5	37110000	37120000
chr5	37130000	37360000
chr5	37500000	37510000
chr5	37530000	37650000
chr5	37660000	37670000
chr5	37700000	37720000
chr5	37730000	37740000
chr5	37920000	38000000
chr5	38020000	38050000
chr5	38060000	38070000
chr5	38080000	38090000
chr5	38470000	38690000
chr5	38700000	38720000
chr5	38730000	38740000
chr5	38760000	38770000
chr5	38820000	38930000
chr5	38940000	39030000
chr5	39040000	39260000
chr5	39270000	39310000
chr5	39320000	39330000
chr5	39370000	39420000
chr5	39430000	39500000
chr5	39510000	39520000
chr5	39530000	39550000
chr5	39710000	39720000
chr5	39750000	39760000
chr5	39770000	39780000
chr5	39800000	39810000
chr5	39820000	39850000
chr5	39870000	39890000
chr5	40010000	40020000
chr5	40030000	40040000
chr5	40070000	40100000
chr5	40120000	40150000
chr5	40180000	40220000
chr5	40300000	40360000
chr5	40370000	40420000
chr5	40430000	40590000
chr5	40600000	40620000
chr5	40760000	40770000
chr5	41050000	41060000
chr5	41100000	41110000
chr5	41340000	41350000
chr5	41400000	41410000
chr5	41420000	41450000
chr5	41460000	41470000
chr5	41480000	41500000
chr5	41800000	41870000
chr5	41980000	41990000
chr5	42260000	42270000
chr5	42290000	42300000
chr5	42370000	42380000
chr5	42400000	42410000
chr5	42910000	42920000
chr5	42940000	42950000
chr5	42960000	42970000
chr5	42980000	43050000
chr5	43060000	43070000
chr5	43080000	43090000
chr5	43280000	43310000
chr5	43360000	43370000
chr5	43390000	43400000
chr5	43440000	43500000
chr5	43800000	43810000
chr5	43820000	43830000
chr5	43920000	43930000
chr5	44020000	44030000
chr5	44070000	44110000
chr5	44130000	44140000
chr5	44160000	44170000
chr5	44180000	44200000
chr5	44220000	44240000
chr5	44300000	44320000
chr5	44350000	44360000
chr5	44560000	44570000
chr5	44580000	44750000
chr5	44870000	44880000
chr5	45030000	45040000
chr5	45170000	45180000
chr5	45210000	45220000
chr5	45260000	45280000
chr5	45290000	45310000
chr5	45320000	45370000
chr5	45380000	45470000
chr5	45480000	45490000
chr5	45600000	45610000
chr5	45640000	45650000
chr5	45810000	45820000
chr5	45830000	45840000
chr5	45850000	45860000
chr5	45870000	45880000
chr5	45900000	45920000
chr5	45940000	45970000
chr5	45990000	46150000
chr5	46160000	46190000
chr5	46200000	46260000
chr5	46280000	46290000
chr5	46300000	46310000
chr5	49540000	49550000
chr5	49560000	49570000
chr5	49610000	49620000
chr5	49630000	49660000
chr5	49800000	49820000
chr5	49840000	49880000
chr5	49980000	50070000
chr5	50100000	50110000
chr5	50440000	50450000
chr5	50460000	50470000
chr5	50480000	50510000
chr5	50540000	50550000
chr5	50560000	50570000
chr5	50710000	50720000
chr5	50730000	50750000
chr5	50760000	50930000
chr5	50940000	51080000
chr5	51090000	51140000
chr5	51150000	51160000
chr5	51190000	51200000
chr5	51460000	51480000
chr5	51510000	51570000
chr5	51610000	51630000
chr5	51650000	51660000
chr5	51680000	51690000
chr5	51750000	51760000
chr5	51770000	51780000
chr5	51800000	51810000
chr5	51980000	52180000
chr5	52190000	52260000
chr5	52270000	52400000
chr5	52530000	52730000
chr5	52740000	52760000
chr5	52850000	52860000
chr5	52870000	52880000
chr5	52910000	52990000
chr5	53020000	53030000
chr5	53270000	53280000
chr5	53310000	53320000
chr5	53330000	53340000
chr5	53370000	53380000
chr5	53400000	53410000
chr5	53420000	53440000
chr5	53610000	53630000
chr5	53640000	53650000
chr5	53690000	53700000
chr5	53710000	53720000
chr5	53880000	54040000
chr5	54050000	54090000
chr5	54240000	54290000
chr5	54320000	54330000
chr5	54340000	54350000
chr5	54400000	54410000
chr5	54420000	54430000
chr5	54540000	54740000
chr5	54750000	54890000
chr5	54910000	54950000
chr5	54960000	54980000
chr5	55010000	55020000
chr5	55050000	55120000
chr5	55140000	55150000
chr5	55160000	55180000
chr5	55190000	55200000
chr5	55230000	55240000
chr5	55250000	55410000
chr5	55420000	55450000
chr5	55460000	55470000
chr5	55490000	55500000
chr5	55620000	55630000
chr5	55650000	55690000
chr5	55700000	55750000
chr5	55760000	55880000
chr5	55890000	55950000
chr5	55960000	56030000
chr5	56210000	56240000
chr5	56250000	56270000
chr5	56280000	56410000
chr5	56430000	56440000
chr5	56470000	56520000
chr5	56630000	56710000
chr5	56720000	56800000
chr5	56820000	56830000
chr5	56870000	56890000
chr5	56910000	56980000
chr5	56990000	57050000
chr5	57080000	57120000
chr5	57130000	57150000
chr5	57160000	57170000
chr5	57180000	57190000
chr5	57250000	57260000
chr5	57270000	57450000
chr5	57470000	57510000
chr5	57520000	57650000
chr5	57660000	57670000
chr5	57680000	57700000
chr5	57940000	57950000
chr5	57980000	57990000
chr5	58290000	58310000
chr5	58320000	58340000
chr5	58350000	58400000
chr5	58410000	58450000
chr5	58480000	58520000
chr5	58540000	58590000
chr5	58610000	58670000
chr5	58770000	58780000
chr5	58790000	58820000
chr5	58830000	58940000
chr5	58950000	58980000
chr5	59010000	59040000
chr5	59050000	59090000
chr5	59390000	59400000
chr5	59440000	59450000
chr5	59460000	59470000
chr5	59730000	59750000
chr5	60050000	60060000
chr5	60290000	60310000
chr5	60320000	60330000
chr5	60360000	60370000
chr5	60380000	60390000
chr5	60400000	60430000
chr5	60470000	60490000
chr5	60540000	60580000
chr5	60590000	60600000
chr5	60610000	60680000
chr5	60690000	60850000
chr5	61050000	61060000
chr5	61130000	61160000
chr5	61170000	61190000
chr5	61290000	61300000
chr5	61320000	61330000
chr5	61350000	61360000
chr5	61560000	61580000
chr5	61590000	61600000
chr5	61610000	61630000
chr5	61640000	61660000
chr5	61680000	61690000
chr5	61780000	61810000
chr5	61820000	61850000
chr5	61870000	61880000
chr5	61890000	61910000
chr5	62440000	62450000
chr5	62840000	62860000
chr5	62890000	62900000
chr5	62920000	62940000
chr5	62960000	62980000
chr5	63140000	63160000
chr5	63190000	63200000
chr5	63640000	63670000
chr5	63680000	63750000
chr5	63940000	63950000
chr5	64000000	64010000
chr5	64020000	64040000
chr5	64070000	64090000
chr5	64120000	64130000
chr5	64150000	64170000
chr5	64180000	64200000
chr5	64240000	64310000
chr5	64350000	64360000
chr5	64370000	64380000
chr5	64390000	64420000
chr5	64430000	64440000
chr5	64450000	64660000
chr5	64680000	64690000
chr5	64740000	64750000
chr5	64870000	64890000
chr5	65030000	65040000
chr5	65050000	65140000
chr5	65150000	65400000
chr5	65430000	65440000
chr5	65450000	65490000
chr5	65750000	65770000
chr5	65780000	65790000
chr5	65800000	65820000
chr5	65840000	65850000
chr5	65860000	65880000
chr5	65900000	65910000
chr5	65920000	65930000
chr5	66100000	66440000
chr5	66620000	66630000
chr5	66660000	66730000
chr5	66740000	66750000
chr5	66760000	66770000
chr5	66800000	66810000
chr5	66820000	66830000
chr5	66840000	66850000
chr5	66860000	66870000
chr5	66950000	66960000
chr5	66980000	66990000
chr5	67050000	67060000
chr5	67360000	67370000
chr5	67580000	67770000
chr5	67780000	67790000
chr5	67850000	67860000
chr5	67870000	67890000
chr5	67900000	67920000
chr5	67930000	67950000
chr5	67960000	67970000
chr5	68040000	68060000
chr5	68100000	68110000
chr5	68120000	68130000
chr5	68140000	68170000
chr5	68180000	68190000
chr5	68200000	68210000
chr5	68400000	68470000
chr5	68480000	68630000
chr5	68650000	68740000
chr5	68750000	68760000
chr5	68770000	68800000
chr5	70760000	70950000
chr5	70960000	70970000
chr5	70980000	70990000
chr5	71030000	71040000
chr5	71110000	71310000
chr5	71320000	71330000
chr5	71340000	71350000
chr5	71360000	71370000
chr5	71390000	71400000
chr5	71410000	71440000
chr5	71460000	71470000
chr5	71480000	71510000
chr5	71520000	71550000
chr5	71560000	71580000
chr5	71590000	71600000
chr5	71640000	71650000
chr5	71660000	71670000
chr5	71680000	71710000
chr5	71720000	71750000
chr5	71760000	71890000
chr5	71900000	71940000
chr5	71950000	72000000
chr5	72030000	72100000
chr5	72120000	72150000
chr5	72160000	72220000
chr5	72250000	72270000
chr5	72280000	72410000
chr5	72430000	72440000
chr5	72450000	72490000
chr5	72510000	72740000
chr5	72850000	72860000
chr5	72870000	73110000
chr5	73120000	73130000
chr5	73140000	73150000
chr5	73170000	73180000
chr5	73210000	73240000
chr5	73270000	73280000
chr5	73290000	73510000
chr5	73520000	73640000
chr5	73670000	73690000
chr5	73700000	73880000
chr5	73890000	73900000
chr5	74010000	74020000
chr5	74030000	74060000
chr5	74070000	74080000
chr5	74090000	74180000
chr5	74290000	74300000
chr5	74320000	74330000
chr5	74340000	74390000
chr5	74400000	74470000
chr5	74480000	74540000
chr5	74560000	74570000
chr5	74640000	74650000
chr5	74670000	74690000
chr5	74700000	74950000
chr5	74960000	74990000
chr5	75230000	75240000
chr5	75250000	75290000
chr5	75300000	75310000
chr5	75340000	75360000
chr5	75450000	75460000
chr5	75730000	75740000
chr5	75870000	76120000
chr5	76300000	76310000
chr5	76330000	76340000
chr5	76480000	76500000
chr5	76520000	76550000
chr5	76580000	76590000
chr5	76610000	76620000
chr5	76630000	76640000
chr5	76720000	76730000
chr5	76980000	77000000
chr5	77010000	77050000
chr5	77060000	77070000
chr5	77090000	77100000
chr5	77120000	77140000
chr5	77150000	77170000
chr5	77200000	77210000
chr5	77220000	77240000
chr5	77310000	77330000
chr5	77340000	77360000
chr5	77370000	77410000
chr5	77420000	77460000
chr5	77470000	77530000
chr5	77580000	77590000
chr5	77660000	77730000
chr5	77740000	77750000
chr5	77760000	77800000
chr5	77810000	77830000
chr5	77850000	78010000
chr5	78030000	78050000
chr5	78140000	78150000
chr5	78440000	78460000
chr5	78540000	78550000
chr5	78560000	78570000
chr5	78580000	78590000
chr5	78600000	78630000
chr5	78670000	78690000
chr5	78710000	78750000
chr5	78930000	78980000
chr5	78990000	79000000
chr5	79010000	79020000
chr5	79040000	79050000
chr5	79060000	79080000
chr5	79270000	79280000
chr5	79450000	79480000
chr5	79520000	79530000
chr5	79740000	79750000
chr5	79760000	79820000
chr5	79830000	79860000
chr5	79870000	79880000
chr5	79900000	79910000
chr5	80050000	80070000
chr5	80080000	80090000
chr5	80100000	80110000
chr5	80130000	80140000
chr5	80150000	80180000
chr5	80200000	80270000
chr5	80280000	80320000
chr5	80330000	80350000
chr5	80360000	80380000
chr5	80760000	80770000
chr5	80810000	80830000
chr5	80870000	80880000
chr5	80940000	80960000
chr5	80970000	81090000
chr5	81100000	81110000
chr5	81130000	81150000
chr5	81160000	81170000
chr5	81300000	81330000
chr5	81340000	81350000
chr5	81360000	81370000
chr5	81380000	81390000
chr5	81400000	81410000
chr5	81660000	81670000
chr5	81680000	81690000
chr5	81700000	81710000
chr5	81720000	81800000
chr5	81810000	81820000
chr5	81840000	81850000
chr5	82350000	82360000
chr5	82390000	82420000
chr5	82430000	82470000
chr5	82490000	82520000
chr5	82580000	82590000
chr5	83620000	83630000
chr5	83730000	83740000
chr5	83970000	83980000
chr5	84000000	84010000
chr5	84030000	84040000
chr5	84890000	84900000
chr5	84920000	84940000
chr5	85380000	85390000
chr5	86170000	86180000
chr5	86360000	86380000
chr5	86390000	86610000
chr5	86620000	86670000
chr5	86680000	86690000
chr5	87500000	87510000
chr5	87530000	87560000
chr5	87630000	87640000
chr5	87760000	87770000
chr5	88530000	88540000
chr5	88600000	88650000
chr5	88670000	88680000
chr5	88700000	88710000
chr5	88730000	88740000
chr5	88840000	88850000
chr5	88900000	88910000
chr5	89230000	89240000
chr5	89250000	89280000
chr5	89290000	89330000
chr5	89340000	89370000
chr5	89380000	89390000
chr5	89400000	89410000
chr5	89790000	89800000
chr5	89810000	89830000
chr5	89860000	89870000
chr5	89990000	90010000
chr5	90200000	90210000
chr5	90220000	90260000
chr5	90280000	90290000
chr5	90300000	90330000
chr5	90370000	90410000
chr5	90420000	90610000
chr5	90620000	90640000
chr5	90650000	90680000
chr5	91050000	91060000
chr5	91290000	91300000
chr5	91780000	91790000
chr5	91860000	91880000
chr5	91890000	91910000
chr5	91920000	91930000
chr5	91940000	91980000
chr5	91990000	92000000
chr5	92010000	92020000
chr5	92030000	92040000
chr5	92380000	92390000
chr5	92410000	92420000
chr5	92440000	92460000
chr5	92470000	92500000
chr5	92510000	92540000
chr5	92560000	92590000
chr5	92610000	92620000
chr5	92630000	92650000
chr5	92660000	92670000
chr5	92690000	92700000
chr5	92820000	92830000
chr5	93330000	93340000
chr5	93410000	93420000
chr5	93600000	93610000
chr5	93670000	93680000
chr5	93730000	93740000
chr5	93780000	93790000
chr5	93810000	93820000
chr5	93990000	94000000
chr5	94010000	94040000
chr5	94390000	94400000
chr5	94410000	94420000
chr5	94430000	94440000
chr5	94470000	94480000
chr5	94540000	94550000
chr5	94810000	94820000
chr5	94830000	94840000
chr5	94850000	94860000
chr5	94870000	94880000
chr5	94900000	94950000
chr5	94970000	95040000
chr5	95050000	95130000
chr5	95180000	95190000
chr5	95220000	95250000
chr5	95260000	95660000
chr5	95710000	95740000
chr5	95750000	95850000
chr5	95860000	95890000
chr5	95900000	95930000
chr5	95940000	95970000
chr5	95980000	96130000
chr5	96140000	96190000
chr5	96200000	96210000
chr5	96220000	96250000
chr5	96260000	96270000
chr5	96280000	96420000
chr5	97390000	97400000
chr5	97550000	97560000
chr5	97680000	97690000
chr5	97880000	97890000
chr5	97920000	97930000
chr5	98210000	98250000
chr5	98270000	98280000
chr5	98360000	98370000
chr5	99160000	99170000
chr5	100070000	100080000
chr5	100090000	100100000
chr5	100150000	100160000
chr5	100170000	100210000
chr5	100220000	100230000
chr5	101390000	101400000
chr5	102100000	102310000
chr5	102320000	102330000
chr5	102500000	102510000
chr5	102520000	102530000
chr5	103850000	103860000
chr5	105700000	105710000
chr5	105720000	105730000
chr5	105760000	105780000
chr5	105790000	105800000
chr5	106710000	106730000
chr5	106740000	106920000
chr5	106960000	106970000
chr5	106990000	107000000
chr5	107610000	107620000
chr5	107630000	107640000
chr5	107650000	107660000
chr5	108050000	108060000
chr5	108080000	108270000
chr5	108280000	108300000
chr5	108310000	108330000
chr5	108430000	108440000
chr5	108450000	108460000
chr5	108670000	108730000
chr5	108740000	108750000
chr5	108760000	108800000
chr5	109050000	109070000
chr5	109080000	109130000
chr5	109140000	109160000
chr5	109170000	109190000
chr5	109490000	109500000
chr5	109560000	109580000
chr5	109760000	109770000
chr5	109790000	109820000
chr5	109830000	109840000
chr5	109880000	109890000
chr5	110120000	110130000
chr5	110140000	110220000
chr5	110230000	110240000
chr5	110250000	110270000
chr5	110280000	110320000
chr5	110330000	110360000
chr5	110370000	110390000
chr5	110610000	110620000
chr5	110640000	110650000
chr5	110660000	110690000
chr5	111030000	111050000
chr5	111070000	111090000
chr5	111110000	111120000
chr5	111130000	111160000
chr5	111200000	111210000
chr5	111230000	111250000
chr5	111270000	111300000
chr5	111330000	111340000
chr5	111350000	111370000
chr5	111960000	111970000
chr5	112070000	112110000
chr5	112350000	112360000
chr5	112440000	112650000
chr5	112660000	112670000
chr5	112710000	112720000
chr5	112740000	112750000
chr5	112810000	112820000
chr5	112830000	112840000
chr5	112850000	112870000
chr5	112880000	112890000
chr5	113560000	113570000
chr5	114540000	114560000
chr5	114670000	114690000
chr5	114710000	114720000
chr5	114730000	114770000
chr5	114790000	114840000
chr5	114850000	114880000
chr5	115210000	115230000
chr5	115240000	115250000
chr5	118480000	118680000
chr5	118690000	118700000
chr5	119430000	119450000
chr5	119490000	119530000
chr5	119590000	119600000
chr5	119610000	119660000
chr5	119690000	119700000
chr5	119710000	119720000
chr5	119740000	119760000
chr5	119930000	119940000
chr5	119960000	119970000
chr5	119980000	119990000
chr5	120000000	120010000
chr5	120480000	120500000
chr5	120510000	120590000
chr5	120600000	120610000
chr5	120620000	120650000
chr5	120660000	120690000
chr5	120700000	120740000
chr5	121300000	121410000
chr5	121420000	121450000
chr5	121510000	121520000
chr5	122110000	122120000
chr5	122130000	122140000
chr5	122160000	122170000
chr5	122290000	122300000
chr5	122310000	122320000
chr5	122720000	122730000
chr5	122740000	122750000
chr5	122810000	122820000
chr5	122840000	122900000
chr5	122920000	122930000
chr5	123240000	123250000
chr5	123940000	123960000
chr5	124070000	124080000
chr5	124660000	124670000
chr5	124690000	124700000
chr5	124710000	124730000
chr5	124820000	124840000
chr5	124850000	124860000
chr5	125030000	125050000
chr5	125100000	125120000
chr5	125140000	125160000
chr5	125180000	125220000
chr5	125230000	125260000
chr5	125270000	125300000
chr5	125480000	125490000
chr5	125670000	125850000
chr5	125860000	125880000
chr5	126150000	126160000
chr5	126340000	126350000
chr5	126380000	126400000
chr5	126430000	126450000
chr5	126480000	126520000
chr5	126580000	126590000
chr5	126600000	126620000
chr5	127220000	127280000
chr5	127290000	127380000
chr5	127390000	127410000
chr5	127430000	127440000
chr5	127650000	127660000
chr5	127740000	127760000
chr5	127780000	127790000
chr5	127810000	127830000
chr5	127840000	127880000
chr5	127890000	127900000
chr5	127920000	127930000
chr5	127940000	127960000
chr5	127980000	127990000
chr5	128350000	128360000
chr5	128590000	128600000
chr5	128840000	128850000
chr5	128880000	128890000
chr5	128960000	128970000
chr5	129500000	129510000
chr5	129580000	129610000
chr5	129620000	129700000
chr5	129710000	129730000
chr5	129740000	129770000
chr5	129780000	129950000
chr5	129960000	129970000
chr5	129980000	129990000
chr5	130520000	130540000
chr5	130550000	130680000
chr5	130690000	130720000
chr5	130840000	130860000
chr5	130870000	130880000
chr5	130890000	130910000
chr5	130930000	130940000
chr5	130970000	130990000
chr5	131000000	131060000
chr5	131070000	131130000
chr5	131150000	131160000
chr5	131180000	131190000
chr5	131240000	131250000
chr5	131440000	131480000
chr5	131490000	131530000
chr5	131550000	131560000
chr5	131570000	131590000
chr5	131620000	131650000
chr5	131660000	131680000
chr5	131700000	131730000
chr5	131740000	131810000
chr5	131820000	131830000
chr5	131840000	131990000
chr5	132000000	132090000
chr5	132120000	132150000
chr5	132200000	132310000
chr5	132320000	132340000
chr5	132350000	132370000
chr5	132400000	132420000
chr5	132510000	132520000
chr5	132540000	132560000
chr5	132580000	132590000
chr5	132870000	132880000
chr5	132950000	132970000
chr5	132980000	133010000
chr5	133020000	133030000
chr5	133040000	133060000
chr5	133090000	133110000
chr5	133370000	133380000
chr5	133480000	133790000
chr5	133800000	133810000
chr5	133820000	133900000
chr5	133930000	133950000
chr5	133980000	134180000
chr5	134190000	134210000
chr5	134220000	134240000
chr5	134270000	134300000
chr5	134310000	134330000
chr5	134350000	134360000
chr5	134410000	134460000
chr5	134470000	134550000
chr5	134590000	134600000
chr5	134610000	134640000
chr5	134740000	134760000
chr5	134800000	134810000
chr5	134850000	134860000
chr5	134880000	134890000
chr5	134940000	134960000
chr5	134970000	134980000
chr5	135000000	135030000
chr5	135060000	135070000
chr5	135250000	135380000
chr5	135390000	135440000
chr5	135450000	135520000
chr5	135810000	135830000
chr5	135850000	135880000
chr5	135900000	135930000
chr5	135940000	135950000
chr5	135990000	136010000
chr5	136230000	136240000
chr5	136310000	136320000
chr5	136340000	136360000
chr5	136380000	136390000
chr5	136430000	136440000
chr5	136450000	136460000
chr5	136470000	136510000
chr5	136520000	136560000
chr5	136650000	136660000
chr5	136720000	136730000
chr5	136750000	136760000
chr5	136770000	136780000
chr5	136790000	136810000
chr5	136830000	136840000
chr5	136860000	136870000
chr5	136920000	136930000
chr5	136980000	136990000
chr5	137060000	137090000
chr5	137100000	137360000
chr5	137370000	137380000
chr5	137470000	137480000
chr5	137540000	137590000
chr5	137600000	137650000
chr5	137660000	137780000
chr5	137790000	137800000
chr5	137810000	137880000
chr5	137890000	137900000
chr5	137940000	137950000
chr5	137980000	138260000
chr5	138290000	138310000
chr5	138320000	138450000
chr5	138460000	138540000
chr5	138560000	138570000
chr5	138620000	138710000
chr5	138750000	138790000
chr5	138840000	138850000
chr5	138860000	138880000
chr5	138890000	138900000
chr5	138910000	138920000
chr5	138930000	139030000
chr5	139050000	139060000
chr5	139090000	139100000
chr5	139110000	139120000
chr5	139130000	139150000
chr5	139160000	139170000
chr5	139220000	139230000
chr5	139240000	139250000
chr5	139290000	139530000
chr5	139540000	139780000
chr5	139790000	139830000
chr5	139840000	140050000
chr5	140060000	140080000
chr5	140130000	140140000
chr5	140230000	140480000
chr5	140490000	140530000
chr5	140540000	140680000
chr5	140690000	140830000
chr5	140840000	140870000
chr5	140900000	141000000
chr5	141070000	141220000
chr5	141240000	141290000
chr5	141350000	141380000
chr5	141390000	141410000
chr5	141420000	141440000
chr5	141450000	141460000
chr5	141470000	141550000
chr5	141590000	141620000
chr5	141640000	141670000
chr5	141680000	141910000
chr5	142010000	142040000
chr5	142060000	142290000
chr5	142300000	142330000
chr5	142340000	142360000
chr5	142380000	142400000
chr5	142410000	142480000
chr5	142490000	142610000
chr5	142620000	142760000
chr5	142770000	142800000
chr5	142840000	142850000
chr5	142870000	143070000
chr5	143080000	143090000
chr5	143100000	143130000
chr5	143140000	143150000
chr5	143160000	143190000
chr5	143230000	143260000
chr5	143270000	143280000
chr5	143300000	143370000
chr5	143380000	143410000
chr5	143440000	143470000
chr5	143490000	143500000
chr5	143890000	143900000
chr5	144090000	144110000
chr5	144370000	144380000
chr5	144760000	144770000
chr5	144820000	144830000
chr5	144840000	144860000
chr5	144870000	144880000
chr5	144910000	144930000
chr5	145260000	145270000
chr5	145290000	145310000
chr5	145320000	145360000
chr5	145490000	145510000
chr5	145520000	145560000
chr5	145590000	145680000
chr5	145840000	145850000
chr5	146090000	146100000
chr5	146140000	146180000
chr5	146230000	146240000
chr5	146400000	146410000
chr5	146700000	146710000
chr5	146740000	146750000
chr5	146800000	146880000
chr5	146920000	146930000
chr5	147010000	147030000
chr5	147080000	147100000
chr5	147150000	147180000
chr5	147190000	147200000
chr5	147230000	147240000
chr5	147260000	147280000
chr5	147290000	147430000
chr5	147440000	147530000
chr5	147550000	147590000
chr5	147600000	147620000
chr5	147630000	147640000
chr5	147670000	147750000
chr5	147770000	147780000
chr5	147870000	147880000
chr5	147890000	147900000
chr5	147940000	147950000
chr5	147960000	147980000
chr5	148010000	148030000
chr5	148130000	148400000
chr5	148410000	148440000
chr5	148450000	148460000
chr5	148480000	148590000
chr5	148600000	148610000
chr5	148730000	148750000
chr5	148760000	148780000
chr5	148800000	148990000
chr5	149010000	149120000
chr5	149130000	149150000
chr5	149160000	149320000
chr5	149330000	149430000
chr5	149460000	149480000
chr5	149540000	149570000
chr5	149590000	149620000
chr5	149630000	149760000
chr5	149790000	149800000
chr5	149810000	149820000
chr5	149830000	149880000
chr5	149890000	149970000
chr5	149980000	149990000
chr5	150000000	150210000
chr5	150220000	150360000
chr5	150380000	150400000
chr5	150420000	150440000
chr5	150470000	150510000
chr5	150540000	150550000
chr5	150750000	150760000
chr5	150870000	150880000
chr5	150900000	150970000
chr5	150980000	151050000
chr5	151090000	151100000
chr5	151120000	151130000
chr5	151310000	151320000
chr5	151370000	151380000
chr5	151410000	151430000
chr5	151460000	151470000
chr5	152140000	152160000
chr5	152170000	152180000
chr5	152330000	152340000
chr5	152400000	152410000
chr5	152500000	152510000
chr5	152600000	152610000
chr5	152640000	152650000
chr5	152690000	152700000
chr5	152920000	152930000
chr5	152980000	153010000
chr5	153030000	153040000
chr5	153100000	153110000
chr5	153230000	153240000
chr5	153590000	153610000
chr5	153620000	153670000
chr5	153680000	153730000
chr5	153740000	153750000
chr5	154150000	154160000
chr5	154170000	154190000
chr5	156790000	156800000
chr5	156850000	156870000
chr5	156900000	156910000
chr5	156930000	156940000
chr5	156970000	157040000
chr5	157050000	157090000
chr5	157220000	157290000
chr5	157750000	157760000
chr5	157770000	157860000
chr5	157920000	157940000
chr5	158250000	158260000
chr5	158320000	158330000
chr5	158350000	158360000
chr5	158390000	158400000
chr5	158410000	158440000
chr5	158580000	158640000
chr5	158650000	158660000
chr5	158670000	158720000
chr5	158740000	158760000
chr5	158910000	158920000
chr5	158970000	158980000
chr5	158990000	159010000
chr5	159030000	159040000
chr5	159050000	159070000
chr5	159110000	159270000
chr5	159280000	159290000
chr5	159310000	159320000
chr5	159630000	159650000
chr5	159690000	159700000
chr5	159740000	159750000
chr5	167060000	167160000
chr5	167170000	167300000
chr5	167320000	167330000
chr5	167710000	167730000
chr5	167740000	167850000
chr5	167870000	167880000
chr5	167940000	167950000
chr5	168520000	168530000
chr5	168740000	168760000
chr5	168790000	168830000
chr5	168840000	168850000
chr5	168860000	168870000
chr5	169150000	169160000
chr5	169180000	169200000
chr5	169210000	169230000
chr5	169250000	169270000
chr5	169280000	169300000
chr5	169310000	169320000
chr5	169330000	169350000
chr5	169550000	169560000
chr5	169580000	169590000
chr5	169630000	169700000
chr5	169710000	169720000
chr5	169730000	169760000
chr5	169770000	169780000
chr5	169820000	169830000
chr5	169840000	169850000
chr5	169860000	169870000
chr5	169880000	169910000
chr5	169930000	169950000
chr5	169960000	169980000
chr5	170000000	170010000
chr5	170040000	170050000
chr5	170070000	170080000
chr5	170150000	170160000
chr5	170260000	170270000
chr5	170280000	170320000
chr5	170330000	170360000
chr5	170370000	170710000
chr5	170970000	171000000
chr5	171010000	171040000
chr5	171050000	171110000
chr5	171130000	171160000
chr5	171190000	171200000
chr5	171290000	171480000
chr5	171490000	171510000
chr5	171530000	171540000
chr5	171550000	171570000
chr5	171580000	171590000
chr5	171610000	171750000
chr5	171810000	171840000
chr5	171940000	171970000
chr5	172030000	172040000
chr5	172080000	172090000
chr5	172160000	172170000
chr5	172180000	172360000
chr5	172430000	172440000
chr5	172480000	172490000
chr5	172500000	172550000
chr5	172560000	172570000
chr5	172760000	172770000
chr5	172780000	172800000
chr5	172810000	172830000
chr5	172840000	172890000
chr5	172900000	172920000
chr5	172930000	172950000
chr5	172970000	172980000
chr5	173160000	173350000
chr5	173360000	173390000
chr5	173580000	173590000
chr5	173690000	173700000
chr5	173880000	173890000
chr5	173900000	173970000
chr5	173980000	174030000
chr5	174080000	174090000
chr5	174490000	174500000
chr5	174520000	174540000
chr5	174550000	174580000
chr5	174650000	174760000
chr5	174770000	174780000
chr5	174790000	174840000
chr5	175180000	175230000
chr5	175840000	175950000
chr5	175990000	176000000
chr5	176170000	176200000
chr5	176210000	176220000
chr5	176230000	176240000
chr5	176260000	176270000
chr5	176320000	176440000
chr5	176450000	176500000
chr5	176550000	176730000
chr5	176740000	176780000
chr5	176790000	176860000
chr5	176870000	176910000
chr5	176970000	176980000
chr5	177500000	177510000
chr5	178030000	178070000
chr5	178110000	178120000
chr5	178130000	178150000
chr5	178310000	178330000
chr5	178510000	178520000
chr5	178670000	178680000
chr5	179040000	179050000
chr5	179120000	179220000
chr5	179270000	179290000
chr5	179380000	179400000
chr5	179410000	179440000
chr5	179450000	179470000
chr5	179610000	179620000
chr5	179660000	179670000
chr5	179680000	179730000
chr5	179740000	179770000
chr5	179850000	179860000
chr5	179870000	179880000
chr5	179890000	179900000
chr5	179920000	179930000
chr5	179940000	179960000
chr5	179970000	180010000
chr5	180120000	180160000
chr5	180170000	180210000
chr5	180220000	180230000
chr5	180240000	180310000
chr5	180320000	180430000
chr5	180450000	180460000
chr5	180490000	180520000
chr5	180540000	180550000
chr5	180560000	180580000
chr5	180610000	180620000
chr7	22710000	22720000
chr7	22770000	22780000
chr7	22990000	23000000
chr7	24990000	25000000
chr7	25010000	25020000
chr7	30350000	30410000
chr7	54990000	55010000
chr7	55030000	55050000
chr7	55060000	55070000
chr7	65750000	65760000
chr7	92390000	92400000
chr7	92420000	92430000
chr7	92450000	92460000
chr7	98730000	98740000
chr7	102490000	102500000
chr7	115980000	115990000
chr7	116050000	116070000
chr7	116080000	116090000
chr7	116100000	116110000
chr7	129490000	129500000
chr8	470000	480000
chr8	500000	510000
chr8	5830000	5840000
chr8	6340000	6470000
chr8	6480000	6510000
chr8	6580000	6600000
chr8	6610000	6620000
chr8	8110000	8170000
chr8	8190000	8250000
chr8	8260000	8520000
chr8	8620000	8630000
chr8	8660000	8680000
chr8	8700000	8720000
chr8	8730000	8740000
chr8	8760000	8780000
chr8	8890000	8900000
chr8	8920000	8930000
chr8	9000000	9020000
chr8	9040000	9050000
chr8	9420000	9490000
chr8	9500000	9510000
chr8	9530000	9580000
chr8	9590000	9600000
chr8	9920000	9940000
chr8	9950000	9970000
chr8	9980000	10000000
chr8	10030000	10040000
chr8	10490000	10550000
chr8	10560000	10680000
chr8	11000000	11010000
chr8	11020000	11030000
chr8	11350000	11400000
chr8	11670000	11710000
chr8	11750000	11770000
chr8	12600000	12610000
chr8	12630000	12640000
chr8	12680000	12690000
chr8	12700000	12710000
chr8	12720000	12740000
chr8	13030000	13040000
chr8	13050000	13180000
chr8	13190000	13200000
chr8	13230000	13290000
chr8	13300000	13320000
chr8	13330000	13340000
chr8	13350000	13410000
chr8	13450000	13460000
chr8	14660000	14670000
chr8	15420000	15440000
chr8	15450000	15470000
chr8	15480000	15490000
chr8	16190000	16200000
chr8	16230000	16240000
chr8	16430000	16440000
chr8	16460000	16500000
chr8	16550000	16560000
chr8	16750000	16760000
chr8	16800000	16820000
chr8	16860000	16870000
chr8	16900000	16910000
chr8	16920000	16970000
chr8	17080000	17090000
chr8	17130000	17140000
chr8	17210000	17240000
chr8	17250000	17290000
chr8	17310000	17320000
chr8	17330000	17350000
chr8	17360000	17380000
chr8	17540000	17730000
chr8	17760000	17770000
chr8	17810000	17820000
chr8	17830000	17870000
chr8	17880000	17900000
chr8	18010000	18020000
chr8	18030000	18040000
chr8	18110000	18120000
chr8	18180000	18240000
chr8	18250000	18270000
chr8	18280000	18300000
chr8	18330000	18340000
chr8	18370000	18380000
chr8	18410000	18420000
chr8	18430000	18440000
chr8	18450000	18470000
chr8	18480000	18520000
chr8	18650000	18660000
chr8	18810000	19010000
chr8	19020000	19030000
chr8	19040000	19070000
chr8	19080000	19090000
chr8	19390000	19400000
chr8	19410000	19450000
chr8	19460000	19510000
chr8	19520000	19530000
chr8	19540000	19560000
chr8	19590000	19600000
chr8	19770000	19780000
chr8	19830000	19840000
chr8	19860000	19870000
chr8	21800000	21810000
chr8	21860000	21870000
chr8	21880000	21890000
chr8	22040000	22050000
chr8	22090000	22110000
chr8	22120000	22260000
chr8	22270000	22400000
chr8	22510000	22530000
chr8	22560000	22570000
chr8	22600000	22700000
chr8	22710000	22740000
chr8	22750000	22760000
chr8	22790000	22800000
chr8	22810000	22840000
chr8	22870000	22920000
chr8	22930000	23140000
chr8	23210000	23220000
chr8	23240000	23270000
chr8	23290000	23300000
chr8	23310000	23320000
chr8	23430000	23470000
chr8	23500000	23510000
chr8	23520000	23530000
chr8	23660000	23680000
chr8	23710000	23730000
chr8	23770000	23780000
chr8	23830000	23840000
chr8	23870000	24050000
chr8	24110000	24120000
chr8	24130000	24140000
chr8	24190000	24200000
chr8	24230000	24240000
chr8	24260000	24270000
chr8	24420000	24430000
chr8	24540000	24550000
chr8	24580000	24590000
chr8	24660000	24670000
chr8	24760000	24770000
chr8	25020000	25100000
chr8	25110000	25310000
chr8	25570000	25580000
chr8	25590000	25650000
chr8	25670000	25680000
chr8	25990000	26010000
chr8	26020000	26060000
chr8	26070000	26240000
chr8	26250000	26260000
chr8	26350000	26360000
chr8	26730000	26740000
chr8	26810000	26830000
chr8	26850000	26860000
chr8	27180000	27190000
chr8	27220000	27290000
chr8	27470000	27490000
chr8	27590000	27600000
chr8	27640000	27690000
chr8	27710000	27720000
chr8	27780000	27790000
chr8	27870000	27880000
chr8	27950000	27960000
chr8	27970000	28040000
chr8	28050000	28100000
chr8	28140000	28150000
chr8	28220000	28230000
chr8	28270000	28280000
chr8	28360000	28390000
chr8	28400000	28440000
chr8	28470000	28490000
chr8	28530000	28550000
chr8	28560000	28570000
chr8	28580000	28600000
chr8	28670000	28680000
chr8	28700000	28720000
chr8	28730000	28910000
chr8	28950000	29010000
chr8	29020000	29070000
chr8	29080000	29120000
chr8	29260000	29390000
chr8	29400000	29430000
chr8	29450000	29480000
chr8	29490000	29560000
chr8	29570000	29630000
chr8	29640000	29830000
chr8	30160000	30170000
chr8	30190000	30260000
chr8	30280000	30360000
chr8	30490000	30500000
chr8	30550000	30560000
chr8	30640000	30660000
chr8	30720000	30730000
chr8	30850000	30860000
chr8	30870000	30990000
chr8	31220000	31230000
chr8	31300000	31310000
chr8	31350000	31360000
chr8	31610000	31630000
chr8	31640000	31670000
chr8	31690000	31700000
chr8	31730000	31760000
chr8	31770000	31780000
chr8	32160000	32170000
chr8	32200000	32210000
chr8	32220000	32230000
chr8	32740000	32750000
chr8	34830000	34840000
chr8	34860000	34870000
chr8	36810000	36820000
chr8	37290000	37300000
chr8	37350000	37360000
chr8	37740000	37750000
chr8	37760000	37790000
chr8	37840000	37850000
chr8	37920000	37930000
chr8	37960000	37980000
chr8	38090000	38240000
chr8	38450000	38460000
chr8	38470000	38480000
chr8	38490000	38500000
chr8	38660000	38770000
chr8	38780000	38960000
chr8	38970000	38990000
chr8	39000000	39010000
chr8	39020000	39030000
chr8	39050000	39080000
chr8	39090000	39140000
chr8	39150000	39160000
chr8	39170000	39180000
chr8	39240000	39250000
chr8	39260000	39280000
chr8	39310000	39320000
chr8	39330000	39340000
chr8	39360000	39370000
chr8	39390000	39400000
chr8	39570000	39580000
chr8	39890000	39900000
chr8	39920000	39930000
chr8	39950000	39970000
chr8	40010000	40020000
chr8	40050000	40060000
chr8	41410000	41420000
chr8	41560000	41570000
chr8	41590000	41600000
chr8	41630000	41640000
chr8	41670000	41680000
chr8	41800000	41840000
chr8	41850000	41880000
chr8	41900000	41920000
chr8	41930000	41950000
chr8	41990000	42000000
chr8	42010000	42090000
chr8	42100000	42220000
chr8	42360000	42380000
chr8	42390000	42410000
chr8	42440000	42450000
chr8	42740000	42750000
chr8	42800000	42810000
chr8	42820000	42830000
chr8	42840000	42850000
chr8	42880000	42890000
chr8	43150000	43160000
chr8	43170000	43180000
chr8	43190000	43200000
chr8	43300000	43310000
chr8	43320000	43330000
chr8	43350000	43360000
chr8	43430000	43500000
chr8	43510000	43550000
chr8	43570000	43720000
chr8	46990000	47000000
chr8	47070000	47080000
chr8	47200000	47220000
chr8	47270000	47280000
chr8	47370000	47390000
chr8	47420000	47430000
chr8	47440000	47450000
chr8	47470000	47480000
chr8	47670000	47680000
chr8	48240000	48310000
chr8	48320000	48330000
chr8	48340000	48390000
chr8	48400000	48410000
chr8	48420000	48460000
chr8	48480000	48540000
chr8	48560000	48570000
chr8	48580000	48590000
chr8	48700000	48870000
chr8	49320000	49330000
chr8	49380000	49390000
chr8	49410000	49430000
chr8	49470000	49480000
chr8	49590000	49600000
chr8	49630000	49640000
chr8	49650000	49660000
chr8	49680000	49720000
chr8	49740000	49750000
chr8	51110000	51120000
chr8	51140000	51150000
chr8	53090000	53100000
chr8	53190000	53200000
chr8	53530000	53560000
chr8	53570000	53590000
chr8	53650000	53760000
chr8	53770000	53790000
chr8	53810000	53830000
chr8	54360000	54370000
chr8	54590000	54600000
chr8	54760000	54770000
chr8	54800000	54810000
chr8	54820000	54930000
chr8	56790000	56800000
chr8	56810000	56820000
chr8	56830000	56850000
chr8	56860000	56880000
chr8	56900000	56910000
chr8	59470000	59480000
chr8	59510000	59520000
chr8	59780000	59790000
chr8	59840000	59850000
chr8	60540000	60550000
chr8	60640000	60650000
chr8	60660000	60670000
chr8	61590000	61600000
chr8	61660000	61670000
chr8	61680000	61740000
chr8	61750000	61760000
chr8	61770000	61780000
chr8	61790000	61800000
chr8	62560000	62650000
chr8	62660000	62680000
chr8	66740000	66760000
chr8	66820000	66830000
chr8	66980000	66990000
chr8	67080000	67100000
chr8	67380000	67390000
chr8	67400000	67410000
chr8	67440000	67450000
chr8	67460000	67530000
chr8	68050000	68060000
chr8	71150000	71160000
chr8	71180000	71190000
chr8	71220000	71240000
chr8	71260000	71270000
chr8	71280000	71290000
chr8	72950000	72960000
chr8	74330000	74340000
chr8	74390000	74430000
chr8	74700000	74710000
chr8	74730000	74750000
chr8	74760000	74800000
chr8	74860000	74880000
chr8	75070000	75080000
chr8	75920000	75930000
chr8	75940000	75960000
chr8	75970000	75980000
chr8	76020000	76030000
chr8	76050000	76060000
chr8	76790000	76800000
chr8	76980000	76990000
chr8	77100000	77110000
chr8	79100000	79120000
chr8	79410000	79420000
chr8	79430000	79440000
chr8	79460000	79470000
chr8	79490000	79500000
chr8	79510000	79530000
chr8	79630000	79640000
chr8	79660000	79670000
chr8	79910000	79920000
chr8	80700000	80710000
chr8	80720000	80770000
chr8	80780000	80800000
chr8	80810000	80910000
chr8	81940000	81950000
chr8	81960000	81970000
chr8	82030000	82040000
chr8	82100000	82110000
chr8	82350000	82360000
chr8	82720000	82730000
chr8	82780000	82790000
chr8	87170000	87180000
chr8	87230000	87250000
chr8	87260000	87280000
chr8	87290000	87320000
chr8	87330000	87340000
chr8	89110000	89120000
chr8	89140000	89150000
chr8	90400000	90410000
chr8	90440000	90460000
chr8	90470000	90480000
chr8	90530000	90540000
chr8	90770000	90790000
chr8	90860000	90890000
chr8	90920000	90950000
chr8	92090000	92100000
chr8	92250000	92260000
chr8	92350000	92370000
chr8	93890000	93900000
chr8	94740000	94750000
chr8	94790000	94800000
chr8	94810000	94870000
chr8	94880000	94980000
chr8	95150000	95160000
chr8	95170000	95180000
chr8	95190000	95210000
chr8	95220000	95230000
chr8	95250000	95260000
chr8	95280000	95300000
chr8	95420000	95430000
chr8	95440000	95450000
chr8	95650000	95660000
chr8	95670000	95710000
chr8	95720000	95730000
chr8	95790000	95800000
chr8	96040000	96050000
chr8	96060000	96080000
chr8	96110000	96120000
chr8	96140000	96170000
chr8	96770000	96790000
chr8	98870000	98880000
chr8	98940000	98950000
chr8	98990000	99010000
chr8	99340000	99350000
chr8	99660000	99680000
chr8	99710000	99720000
chr8	99730000	99770000
chr8	99780000	99810000
chr8	99820000	99830000
chr8	99840000	99860000
chr8	99880000	99890000
chr8	100190000	100200000
chr8	100250000	100260000
chr8	100300000	100310000
chr8	100340000	100350000
chr8	100450000	100460000
chr8	100470000	100490000
chr8	100540000	100560000
chr8	100660000	100680000
chr8	100690000	100700000
chr8	101220000	101240000
chr8	101250000	101410000
chr8	101420000	101440000
chr8	101450000	101490000
chr8	101510000	101520000
chr8	101530000	101540000
chr8	101650000	101660000
chr8	101670000	101760000
chr8	101770000	101790000
chr8	101800000	101820000
chr8	101830000	101840000
chr8	101850000	101860000
chr8	101890000	101900000
chr8	101920000	101940000
chr8	101950000	101960000
chr8	101970000	101980000
chr8	102000000	102170000
chr8	102180000	102230000
chr8	102430000	102450000
chr8	102470000	102480000
chr8	102500000	102540000
chr8	102550000	102560000
chr8	102570000	102580000
chr8	102630000	102640000
chr8	102890000	102910000
chr8	102970000	102980000
chr8	103010000	103020000
chr8	103040000	103050000
chr8	103260000	103270000
chr8	103300000	103430000
chr8	103470000	103480000
chr8	103650000	103790000
chr8	103800000	103820000
chr8	104170000	104180000
chr8	104230000	104240000
chr8	104260000	104350000
chr8	104370000	104390000
chr8	104410000	104420000
chr8	104440000	104450000
chr8	104900000	104910000
chr8	104930000	104940000
chr8	104950000	104960000
chr8	104970000	104980000
chr8	105000000	105030000
[truncated: 1,836 more rows]

## Sheet: S024_R1
Supplementary Table S6: FIREs called by FIREcaller from HiC libraries
chr	Start	End
chr1	1120000	1130000
chr1	8580000	8590000
chr1	8600000	8640000
chr1	8680000	8690000
chr1	8710000	8730000
chr1	8740000	8750000
chr1	12530000	12540000
chr1	24710000	24720000
chr1	25150000	25160000
chr1	26920000	26930000
chr1	26940000	26950000
chr1	27000000	27030000
chr1	27040000	27080000
chr1	27110000	27120000
chr1	27740000	27750000
chr1	27760000	27770000
chr1	27810000	27820000
chr1	28350000	28370000
chr1	28390000	28400000
chr1	28410000	28420000
chr1	28430000	28470000
chr1	32380000	32390000
chr1	33470000	33480000
chr1	36740000	36760000
chr1	39720000	39730000
chr1	40310000	40320000
chr1	40720000	40730000
chr1	40800000	40810000
chr1	45630000	45640000
chr1	59510000	59520000
chr1	59560000	59570000
chr1	59580000	59590000
chr1	59960000	59970000
chr1	66360000	66370000
chr1	66740000	66750000
chr1	66800000	66810000
chr1	66840000	66850000
chr1	71850000	71860000
chr1	73930000	73940000
chr1	77570000	77580000
chr1	84670000	84680000
chr1	87960000	87970000
chr1	88300000	88310000
chr1	88330000	88340000
chr1	89590000	89600000
chr1	89640000	89650000
chr1	89660000	89670000
chr1	89730000	89740000
chr1	89770000	89780000
chr1	90060000	90070000
chr1	90090000	90100000
chr1	90160000	90170000
chr1	90200000	90210000
chr1	94270000	94280000
chr1	98300000	98310000
chr1	98380000	98390000
chr1	101140000	101150000
chr1	101180000	101190000
chr1	103270000	103280000
chr1	105160000	105170000
chr1	105200000	105210000
chr1	105490000	105500000
chr1	105560000	105570000
chr1	105590000	105600000
chr1	105870000	105880000
chr1	106100000	106110000
chr1	106500000	106510000
chr1	106810000	106830000
chr1	106860000	106870000
chr1	107900000	107910000
chr1	108410000	108420000
chr1	108460000	108480000
chr1	109930000	109940000
chr1	111230000	111240000
chr1	111300000	111310000
chr1	111470000	111480000
chr1	111770000	111780000
chr1	112130000	112140000
chr1	112160000	112170000
chr1	112200000	112210000
chr1	113880000	113890000
chr1	113950000	113960000
chr1	114040000	114060000
chr1	115520000	115530000
chr1	118230000	118240000
chr1	119190000	119200000
chr1	145420000	145430000
chr1	145450000	145460000
chr1	145510000	145520000
chr1	149820000	149830000
chr1	149970000	149980000
chr1	149990000	150000000
chr1	150010000	150070000
chr1	150090000	150100000
chr1	150550000	150560000
chr1	150600000	150610000
chr1	150660000	150670000
chr1	150700000	150710000
chr1	150770000	150780000
chr1	151960000	151970000
chr1	152250000	152260000
chr1	152300000	152320000
chr1	152800000	152810000
chr1	153090000	153100000
chr1	153540000	153550000
chr1	154670000	154680000
chr1	154730000	154740000
chr1	155430000	155440000
chr1	155460000	155480000
chr1	155880000	155890000
chr1	155900000	155910000
chr1	155950000	155960000
chr1	157210000	157220000
chr1	157340000	157350000
chr1	158350000	158370000
chr1	158390000	158400000
chr1	158840000	158850000
chr1	159490000	159500000
chr1	160470000	160480000
chr1	160550000	160560000
chr1	160710000	160720000
chr1	160730000	160740000
chr1	160800000	160810000
chr1	163030000	163040000
chr1	167370000	167380000
chr1	172150000	172160000
chr1	172940000	172950000
chr1	174810000	174820000
chr1	178280000	178290000
chr1	182200000	182210000
chr1	183770000	183780000
chr1	184930000	184950000
chr1	185220000	185230000
chr1	185380000	185390000
chr1	185450000	185460000
chr1	185480000	185490000
chr1	185500000	185510000
chr1	188470000	188480000
chr1	197660000	197670000
chr1	198490000	198500000
chr1	198510000	198530000
chr1	198580000	198590000
chr1	198620000	198640000
chr1	198650000	198660000
chr1	198850000	198860000
chr1	198890000	198900000
chr1	198960000	198980000
chr1	199110000	199120000
chr1	200760000	200770000
chr1	202540000	202550000
chr1	207360000	207370000
chr1	207440000	207450000
chr1	221230000	221240000
chr1	224120000	224130000
chr1	227410000	227420000
chr1	234780000	234790000
chr1	234980000	235000000
chr1	235040000	235050000
chr1	235470000	235480000
chr1	246410000	246420000
chr1	247900000	247910000
chr1	248340000	248350000
chr2	4700000	4710000
chr2	11450000	11460000
chr2	24710000	24720000
chr2	24810000	24820000
chr2	25730000	25740000
chr2	26290000	26300000
chr2	28110000	28120000
chr2	28130000	28140000
chr2	28170000	28190000
chr2	28200000	28210000
chr2	28230000	28240000
chr2	28340000	28360000
chr2	28490000	28500000
chr2	32140000	32150000
chr2	37830000	37840000
chr2	55220000	55230000
chr2	58420000	58430000
chr2	61110000	61120000
chr2	64340000	64380000
chr2	64390000	64410000
chr2	64430000	64460000
chr2	64480000	64490000
chr2	64870000	64920000
chr2	64940000	64980000
chr2	64990000	65000000
chr2	68500000	68510000
chr2	68970000	69000000
chr2	69060000	69070000
chr2	69870000	69880000
chr2	69930000	69940000
chr2	70160000	70180000
chr2	70240000	70300000
chr2	70310000	70320000
chr2	84990000	85000000
chr2	85760000	85780000
chr2	86880000	86890000
chr2	98500000	98520000
chr2	102690000	102700000
chr2	111970000	111980000
chr2	112000000	112010000
chr2	113510000	113520000
chr2	113530000	113540000
chr2	113550000	113560000
chr2	136870000	136880000
chr2	182160000	182180000
chr2	197030000	197040000
chr2	198050000	198060000
chr2	198170000	198180000
chr2	201830000	201840000
chr2	201880000	201890000
chr2	201910000	201920000
chr2	201930000	201940000
chr2	231200000	231210000
chr2	231230000	231240000
chr2	231280000	231300000
chr2	231320000	231330000
chr2	231350000	231360000
chr2	232900000	232910000
chr2	232930000	232950000
chr2	232970000	232980000
chr2	233000000	233010000
chr2	233040000	233060000
chr2	235270000	235280000
chr2	237800000	237810000
chr2	240240000	240250000
chr2	240800000	240820000
chr2	242200000	242210000
chr2	242290000	242300000
chr2	242320000	242340000
chr2	242350000	242360000
chr3	4820000	4830000
chr3	4840000	4950000
chr3	4970000	4980000
chr3	5000000	5020000
chr3	12330000	12340000
chr3	12350000	12360000
chr3	12390000	12400000
chr3	12430000	12440000
chr3	15280000	15290000
chr3	15310000	15320000
chr3	15370000	15380000
chr3	15410000	15430000
chr3	15800000	15810000
chr3	15830000	15840000
chr3	16480000	16490000
chr3	17060000	17070000
chr3	17680000	17690000
chr3	18720000	18730000
chr3	18970000	18980000
chr3	21290000	21300000
chr3	27520000	27530000
chr3	30470000	30480000
chr3	30650000	30660000
chr3	32540000	32550000
chr3	38230000	38240000
chr3	39250000	39260000
chr3	44030000	44040000
chr3	45240000	45250000
chr3	46010000	46020000
chr3	46110000	46120000
chr3	46140000	46180000
chr3	46200000	46360000
chr3	46370000	46410000
chr3	47000000	47010000
chr3	47060000	47070000
chr3	47100000	47110000
chr3	47120000	47150000
chr3	47160000	47180000
chr3	47300000	47310000
chr3	47650000	47700000
chr3	47720000	47730000
chr3	47760000	47790000
chr3	48000000	48010000
chr3	48030000	48040000
chr3	48380000	48390000
chr3	48400000	48410000
chr3	48470000	48490000
chr3	48500000	48510000
chr3	48540000	48550000
chr3	49370000	49400000
chr3	49440000	49450000
chr3	50030000	50040000
chr3	50260000	50270000
chr3	50900000	50910000
chr3	50920000	50930000
chr3	50970000	50980000
chr3	51070000	51080000
chr3	52930000	52940000
chr3	52960000	52970000
chr3	53560000	53570000
chr3	56830000	56850000
chr3	58800000	58810000
chr3	72120000	72130000
chr3	78850000	78860000
chr3	78960000	78970000
chr3	81710000	81720000
chr3	81790000	81800000
chr3	82070000	82080000
chr3	83890000	83900000
chr3	86540000	86550000
chr3	87450000	87460000
chr3	87800000	87810000
chr3	87950000	87960000
chr3	88810000	88830000
chr3	89300000	89310000
chr3	89460000	89470000
chr3	89550000	89560000
chr3	89780000	89790000
chr3	95090000	95100000
chr3	95550000	95560000
chr3	96830000	96840000
chr3	97190000	97200000
chr3	97550000	97560000
chr3	98960000	98970000
chr3	101660000	101670000
chr3	101730000	101750000
chr3	101770000	101780000
chr3	102890000	102900000
chr3	104870000	104880000
chr3	104920000	104930000
chr3	105540000	105550000
chr3	107450000	107460000
chr3	108090000	108100000
chr3	112040000	112050000
chr3	112540000	112550000
chr3	112570000	112580000
chr3	120720000	120730000
chr3	120750000	120760000
chr3	121540000	121550000
chr3	121730000	121740000
chr3	121840000	121850000
chr3	125000000	125020000
chr3	125030000	125040000
chr3	128440000	128460000
chr3	128470000	128480000
chr3	128490000	128530000
chr3	128870000	128890000
chr3	128960000	128970000
chr3	129390000	129400000
chr3	129470000	129480000
chr3	129490000	129510000
chr3	130070000	130080000
chr3	132860000	132870000
chr3	138860000	138870000
chr3	141080000	141090000
chr3	141160000	141180000
chr3	141260000	141280000
chr3	141450000	141460000
chr3	142940000	142950000
chr3	148990000	149000000
chr3	150160000	150170000
chr3	151900000	151920000
chr3	151940000	151970000
chr3	151980000	152020000
chr3	152030000	152070000
chr3	152080000	152090000
chr3	153060000	153070000
chr3	153260000	153270000
chr3	156720000	156730000
chr3	158150000	158160000
chr3	162940000	162950000
chr3	163960000	163970000
chr3	164810000	164820000
chr3	165830000	165840000
chr3	165870000	165880000
chr3	166570000	166580000
chr3	168350000	168360000
chr3	169210000	169220000
chr3	169810000	169820000
chr3	171000000	171010000
chr3	171020000	171030000
chr3	171750000	171940000
chr3	175150000	175160000
chr3	176820000	176830000
chr3	176860000	176870000
chr3	176910000	176920000
chr3	178880000	178890000
chr3	178920000	178930000
chr3	179920000	179930000
chr3	181760000	181770000
chr3	181780000	181790000
chr3	182630000	182640000
chr3	182970000	182980000
chr3	182990000	183000000
chr3	183080000	183100000
chr3	183720000	183740000
chr3	187170000	187180000
chr3	187570000	187600000
chr3	187630000	187640000
chr3	187670000	187710000
chr3	187790000	187800000
chr3	188200000	188210000
chr3	188270000	188280000
chr3	189110000	189120000
chr3	189160000	189170000
chr3	189240000	189250000
chr3	189280000	189290000
chr3	189370000	189390000
chr3	189420000	189430000
chr3	189500000	189520000
chr3	189720000	189730000
chr3	190030000	190040000
chr3	190600000	190610000
chr3	190980000	190990000
chr3	191060000	191080000
chr3	191550000	191560000
chr3	191580000	191590000
chr3	191620000	191630000
chr3	193600000	193620000
chr3	193640000	193650000
chr3	193690000	193700000
chr3	194190000	194200000
chr3	194610000	194670000
chr3	195030000	195050000
chr3	195060000	195080000
chr3	195100000	195110000
chr3	195120000	195140000
chr3	195160000	195170000
chr3	195520000	195530000
chr3	195580000	195590000
chr3	195750000	195760000
chr3	195790000	195810000
chr3	195840000	195850000
chr3	195880000	195930000
chr3	196050000	196100000
chr3	196150000	196160000
chr3	196290000	196300000
chr3	196320000	196340000
chr3	196400000	196420000
chr3	196460000	196490000
chr3	196550000	196560000
chr3	196790000	196850000
chr3	196880000	196890000
chr3	196900000	196950000
chr3	196960000	196990000
chr3	197010000	197070000
chr3	197090000	197130000
chr3	197150000	197190000
chr3	197470000	197480000
chr3	197520000	197530000
chr3	197550000	197570000
chr3	197580000	197590000
chr3	197630000	197640000
chr3	197720000	197730000
chr3	197790000	197800000
chr4	1260000	1270000
chr4	2880000	2890000
chr4	6870000	6880000
chr4	6980000	6990000
chr4	40560000	40570000
chr4	40630000	40640000
chr4	84100000	84120000
chr4	84130000	84140000
chr4	153420000	153430000
chr4	153560000	153570000
chr4	185290000	185310000
chr4	185320000	185360000
chr4	185380000	185400000
chr4	185450000	185460000
chr4	185770000	185780000
chr5	14210000	14220000
chr5	19150000	19170000
chr5	33120000	33130000
chr5	40540000	40550000
chr5	42990000	43000000
chr5	43030000	43040000
chr5	49800000	49810000
chr5	49840000	49850000
chr5	49860000	49870000
chr5	53940000	53950000
chr5	53960000	53970000
chr5	53980000	53990000
chr5	54030000	54040000
chr5	70810000	70820000
chr5	80940000	80950000
chr5	88600000	88610000
chr5	90510000	90520000
chr5	95440000	95450000
chr5	100060000	100070000
chr5	131750000	131760000
chr5	138350000	138360000
chr5	138400000	138410000
chr5	148890000	148900000
chr5	172220000	172230000
chr5	173200000	173220000
chr5	173250000	173260000
chr5	173310000	173320000
chr5	176830000	176840000
chr5	176880000	176890000
chr5	180340000	180350000
chr5	180370000	180380000
chr6	270000	280000
chr6	290000	300000
chr6	320000	340000
chr6	2020000	2030000
chr6	2580000	2590000
chr6	2830000	2860000
chr6	2920000	2930000
chr6	4830000	4840000
chr6	9670000	9680000
chr6	11310000	11320000
chr6	11330000	11350000
chr6	11370000	11390000
chr6	11410000	11420000
chr6	11850000	11860000
chr6	16610000	16620000
chr6	16690000	16700000
chr6	24930000	24940000
chr6	24990000	25000000
chr6	25010000	25020000
chr6	26100000	26110000
chr6	26150000	26160000
chr6	26230000	26240000
chr6	26280000	26290000
chr6	26360000	26370000
chr6	26400000	26410000
chr6	26440000	26450000
chr6	26470000	26480000
chr6	29930000	29940000
chr6	30450000	30460000
chr6	30520000	30530000
chr6	30640000	30650000
chr6	30680000	30700000
chr6	30790000	30800000
chr6	31200000	31220000
chr6	31270000	31280000
chr6	31290000	31320000
chr6	31560000	31570000
chr6	31630000	31640000
chr6	31670000	31680000
chr6	31690000	31710000
chr6	31730000	31750000
chr6	31760000	31800000
chr6	32190000	32200000
chr6	32430000	32440000
chr6	32490000	32500000
chr6	32510000	32520000
chr6	32530000	32560000
chr6	32570000	32590000
chr6	32600000	32620000
chr6	32650000	32660000
chr6	32800000	32810000
chr6	32830000	32840000
chr6	32850000	32880000
chr6	32890000	32910000
chr6	32930000	32940000
chr6	32950000	32960000
chr6	32980000	32990000
chr6	33040000	33050000
chr6	33110000	33120000
chr6	33210000	33220000
chr6	34270000	34280000
chr6	34300000	34310000
chr6	34360000	34370000
chr6	34990000	35000000
chr6	35100000	35110000
chr6	35310000	35320000
chr6	35550000	35560000
chr6	35630000	35640000
chr6	36030000	36040000
chr6	36160000	36170000
chr6	36430000	36440000
chr6	36460000	36490000
chr6	36510000	36520000
chr6	36560000	36570000
chr6	36980000	36990000
chr6	37010000	37030000
chr6	37070000	37080000
chr6	37130000	37140000
chr6	38240000	38250000
chr6	42320000	42330000
chr6	42370000	42380000
chr6	42420000	42430000
chr6	42860000	42870000
chr6	45130000	45140000
chr6	47150000	47160000
chr6	52320000	52330000
chr6	52380000	52390000
chr6	53160000	53170000
chr6	53180000	53190000
chr6	55320000	55330000
chr6	56360000	56370000
chr6	56500000	56510000
chr6	78570000	78580000
chr6	81450000	81460000
chr6	108930000	108940000
chr6	112140000	112150000
chr6	116680000	116690000
chr6	116740000	116760000
chr6	116780000	116790000
chr6	134670000	134680000
chr6	134690000	134700000
chr6	134750000	134760000
chr6	137040000	137050000
chr6	137470000	137480000
chr6	137590000	137600000
chr6	138130000	138140000
chr6	138160000	138170000
chr6	138180000	138200000
chr7	5600000	5610000
chr7	5710000	5720000
chr7	7860000	7870000
chr7	30360000	30370000
chr7	30390000	30400000
chr7	76870000	76880000
chr7	77380000	77390000
chr7	100140000	100150000
chr7	104920000	104930000
chr7	104940000	104950000
chr7	105980000	105990000
chr7	106000000	106010000
chr7	130690000	130700000
chr7	150260000	150270000
chr8	8290000	8300000
chr8	9000000	9010000
chr8	13930000	13940000
chr8	14050000	14060000
chr8	16430000	16440000
chr8	16470000	16480000
chr8	16800000	16810000
chr8	17570000	17590000
chr8	19390000	19410000
chr8	19420000	19440000
chr8	19450000	19470000
chr8	19480000	19510000
chr8	19520000	19560000
chr8	22280000	22290000
chr8	22610000	22620000
chr8	23100000	23110000
chr8	24010000	24020000
chr8	24110000	24120000
chr8	24200000	24210000
chr8	25220000	25230000
chr8	26190000	26200000
chr8	28670000	28680000
chr8	28800000	28820000
chr8	28860000	28890000
chr8	29090000	29100000
chr8	29290000	29310000
chr8	29380000	29390000
chr8	29410000	29420000
chr8	34250000	34260000
chr8	38140000	38170000
chr8	39500000	39510000
chr8	41850000	41860000
chr8	41990000	42000000
chr8	42120000	42130000
chr8	43460000	43470000
chr8	43540000	43550000
chr8	43580000	43590000
chr8	43610000	43620000
chr8	48350000	48360000
chr8	48370000	48380000
chr8	48390000	48410000
chr8	48420000	48460000
chr8	48480000	48500000
chr8	48510000	48520000
chr8	56830000	56840000
chr8	56850000	56860000
chr8	61720000	61740000
chr8	61750000	61760000
chr8	61790000	61800000
chr8	61860000	61870000
chr8	66750000	66760000
chr8	67080000	67090000
chr8	71130000	71140000
chr8	71150000	71160000
chr8	71180000	71190000
chr8	71220000	71230000
chr8	71280000	71290000
chr8	71310000	71320000
chr8	74760000	74770000
chr8	77030000	77040000
chr8	82060000	82070000
chr8	82390000	82400000
chr8	88430000	88440000
chr8	90860000	90870000
chr8	90930000	90940000
chr8	96030000	96040000
chr8	96070000	96080000
chr8	96140000	96170000
chr8	100550000	100560000
chr8	101270000	101280000
chr8	101290000	101360000
chr8	101390000	101410000
chr8	102500000	102510000
chr8	104290000	104300000
chr8	110120000	110130000
chr8	113980000	113990000
chr8	115610000	115620000
chr8	116570000	116580000
chr8	125110000	125120000
chr8	125240000	125250000
chr8	125310000	125320000
chr8	126190000	126210000
chr8	126220000	126360000
chr8	126380000	126390000
chr8	126520000	126530000
chr8	130980000	130990000
chr8	131230000	131240000
chr8	131250000	131270000
chr8	131320000	131350000
chr8	132970000	132980000
chr8	134040000	134100000
chr8	134140000	134150000
chr8	134320000	134330000
chr8	134340000	134350000
chr8	134700000	134710000
chr8	135070000	135090000
chr8	141470000	141480000
chr8	141520000	141530000
chr8	141820000	141830000
chr8	141980000	141990000
chr8	142100000	142110000
chr8	142150000	142170000
chr8	142180000	142200000
chr8	142210000	142220000
chr8	142250000	142260000
chr8	143940000	143950000
chr8	143970000	143980000
chr8	144970000	144980000
chr8	145050000	145060000
chr8	145070000	145090000
chr8	145780000	145790000
chr8	145830000	145840000
chr8	145970000	145980000
chr8	145990000	146000000
chr8	146070000	146080000
chr8	146100000	146110000
chr8	146120000	146150000
chr8	146160000	146170000
chr8	146220000	146230000
chr9	260000	280000
chr9	310000	320000
chr9	5460000	5470000
chr9	24180000	24190000
chr9	31440000	31450000
chr9	33220000	33230000
chr9	35880000	35890000
chr9	37140000	37150000
chr9	125410000	125420000
chr9	129830000	129840000
chr9	132120000	132130000
chr9	132710000	132730000
chr9	132750000	132760000
chr9	134520000	134530000
chr10	6400000	6410000
chr10	104040000	104050000
chr11	2350000	2360000
chr11	3360000	3370000
chr11	3980000	4000000
chr11	6980000	6990000
chr11	10540000	10590000
chr11	10600000	10610000
chr11	10630000	10640000
chr11	16290000	16310000
chr11	22600000	22610000
chr11	34780000	34790000
chr11	35020000	35030000
chr11	35050000	35070000
chr11	35090000	35110000
chr11	35140000	35150000
chr11	35160000	35220000
chr11	35230000	35240000
chr11	46020000	46030000
chr11	46060000	46070000
chr11	46120000	46130000
chr11	55360000	55370000
chr11	60250000	60260000
chr11	61710000	61720000
chr11	62490000	62500000
chr11	62550000	62560000
chr11	62840000	62850000
chr11	63140000	63150000
chr11	65040000	65050000
chr11	65080000	65090000
chr11	65130000	65140000
chr11	65150000	65160000
chr11	65180000	65210000
chr11	65220000	65240000
chr11	65260000	65280000
chr11	65510000	65550000
chr11	65570000	65610000
chr11	65650000	65660000
chr11	66380000	66390000
chr11	66400000	66410000
chr11	69160000	69170000
chr11	71850000	71860000
chr11	72600000	72610000
chr11	72660000	72670000
chr11	72680000	72740000
chr11	72750000	72770000
chr11	72780000	72790000
chr11	72820000	72840000
chr11	73850000	73860000
chr11	74080000	74090000
chr11	75740000	75750000
chr11	78120000	78130000
chr11	85740000	85790000
chr11	85810000	85850000
chr11	85900000	85910000
chr11	95870000	95880000
chr11	95940000	95960000
chr11	95990000	96000000
chr11	96920000	96930000
chr11	104930000	104950000
chr11	104970000	104980000
chr11	116830000	116850000
chr11	116890000	116920000
chr11	117810000	117820000
chr11	118090000	118100000
chr11	118120000	118140000
chr11	118660000	118670000
chr11	128310000	128320000
chr11	129870000	129880000
chr12	560000	570000
chr12	720000	730000
chr12	740000	810000
chr12	830000	870000
chr12	880000	930000
chr12	1150000	1160000
chr12	1280000	1290000
chr12	1310000	1340000
chr12	1380000	1390000
chr12	1400000	1410000
chr12	1430000	1460000
chr12	1470000	1480000
chr12	1500000	1510000
chr12	1540000	1550000
chr12	1850000	1860000
chr12	1870000	1880000
chr12	4200000	4230000
chr12	4240000	4290000
chr12	4310000	4320000
chr12	6300000	6310000
chr12	6530000	6540000
chr12	6570000	6580000
chr12	6770000	6780000
chr12	6790000	6800000
chr12	6860000	6870000
chr12	7120000	7130000
chr12	7240000	7250000
chr12	7530000	7540000
chr12	7640000	7650000
chr12	8120000	8130000
chr12	8140000	8150000
chr12	8640000	8650000
chr12	9850000	9860000
chr12	9950000	9960000
chr12	9980000	9990000
chr12	10010000	10020000
chr12	10070000	10080000
chr12	10090000	10110000
chr12	10160000	10190000
chr12	10220000	10230000
chr12	10240000	10250000
chr12	10540000	10550000
chr12	10560000	10570000
chr12	10640000	10650000
chr12	10680000	10690000
chr12	11150000	11160000
chr12	11190000	11200000
chr12	11850000	11860000
chr12	11870000	11890000
chr12	11900000	11920000
chr12	11930000	11970000
chr12	11980000	11990000
chr12	12010000	12020000
chr12	12560000	12570000
chr12	12660000	12680000
chr12	12710000	12720000
chr12	14530000	14550000
chr12	14600000	14610000
chr12	14990000	15000000
chr12	15780000	15790000
chr12	17520000	17530000
chr12	17920000	17930000
chr12	22300000	22310000
chr12	23550000	23560000
chr12	26380000	26390000
chr12	28650000	28660000
chr12	31980000	31990000
chr12	39180000	39190000
chr12	46860000	46870000
chr12	46950000	46960000
chr12	47200000	47220000
chr12	47600000	47610000
chr12	50100000	50110000
chr12	50960000	50970000
chr12	51030000	51040000
chr12	51260000	51270000
chr12	52870000	52880000
chr12	53660000	53670000
chr12	53740000	53750000
chr12	55240000	55250000
chr12	68870000	68880000
chr12	68930000	68940000
chr12	76330000	76340000
chr12	80870000	80880000
chr12	89540000	89550000
chr12	89570000	89580000
chr12	89600000	89620000
chr12	89630000	89650000
chr12	89660000	89680000
chr12	90150000	90160000
chr12	90250000	90270000
chr12	90930000	90940000
chr12	96600000	96610000
chr12	96770000	96780000
chr12	104910000	104930000
chr12	105030000	105040000
chr12	109050000	109070000
chr12	109080000	109090000
chr12	109120000	109130000
chr12	116600000	116610000
chr12	121250000	121260000
chr12	121310000	121320000
chr12	122060000	122070000
chr12	122520000	122530000
chr12	123230000	123240000
chr12	123370000	123380000
chr13	41550000	41560000
chr13	41590000	41600000
chr13	45780000	45790000
chr13	48970000	48990000
chr13	49000000	49010000
chr13	49100000	49110000
chr13	52250000	52260000
chr13	77790000	77800000
chr13	77880000	77890000
chr13	77900000	77910000
chr13	99920000	99940000
chr13	114930000	114950000
chr14	21320000	21330000
chr14	23450000	23460000
chr14	61990000	62000000
chr14	62010000	62040000
chr14	62060000	62070000
chr14	62100000	62110000
chr14	62120000	62130000
chr14	62160000	62180000
chr14	66030000	66040000
chr14	68600000	68620000
chr14	75740000	75750000
chr14	75760000	75770000
chr14	91520000	91530000
chr14	102230000	102240000
chr15	31610000	31620000
chr15	31650000	31660000
chr15	41300000	41310000
chr15	44950000	44960000
chr15	50370000	50380000
chr15	51970000	51980000
chr15	53830000	53840000
chr15	64080000	64090000
chr15	66020000	66030000
chr15	68430000	68440000
chr15	75420000	75430000
chr15	75490000	75500000
chr15	77040000	77050000
chr15	77550000	77560000
chr15	78400000	78410000
chr15	85980000	85990000
chr15	86020000	86030000
chr15	86150000	86170000
chr15	90410000	90420000
chr15	90930000	90940000
chr15	91020000	91030000
chr15	93440000	93450000
chr15	100120000	100130000
chr15	101660000	101670000
chr15	101740000	101760000
chr16	31950000	31960000
chr16	35100000	35110000
chr16	70990000	71000000
chr16	71110000	71120000
chr16	89480000	89500000
chr17	120000	130000
chr17	200000	210000
chr17	440000	450000
chr17	460000	470000
chr17	760000	770000
chr17	1260000	1270000
chr17	1300000	1310000
chr17	1350000	1360000
chr17	1410000	1420000
chr17	2000000	2120000
chr17	2130000	2150000
chr17	2530000	2540000
chr17	3020000	3030000
chr17	3120000	3130000
chr17	3270000	3280000
chr17	3330000	3340000
chr17	4130000	4140000
chr17	4160000	4170000
chr17	4200000	4230000
chr17	4240000	4250000
chr17	4630000	4640000
chr17	4690000	4700000
chr17	6740000	6750000
chr17	6810000	6820000
chr17	7380000	7390000
chr17	7760000	7790000
chr17	7890000	7900000
chr17	8460000	8470000
chr17	9330000	9340000
chr17	9910000	9920000
chr17	9960000	9970000
chr17	10050000	10060000
chr17	10330000	10340000
chr17	10360000	10370000
chr17	11610000	11620000
chr17	11950000	11960000
chr17	12380000	12390000
chr17	12400000	12410000
chr17	12460000	12480000
chr17	12550000	12560000
chr17	12610000	12620000
chr17	13410000	13420000
chr17	13580000	13590000
chr17	13680000	13690000
chr17	13730000	13740000
chr17	13940000	13950000
chr17	14000000	14010000
chr17	14030000	14040000
chr17	14060000	14070000
chr17	14530000	14540000
chr17	14610000	14620000
chr17	14990000	15000000
chr17	15860000	15870000
chr17	15980000	15990000
chr17	16050000	16060000
chr17	17760000	17770000
chr17	17810000	17820000
chr17	19510000	19520000
chr17	19540000	19550000
chr17	19590000	19600000
chr17	21770000	21790000
chr17	22070000	22110000
chr17	25470000	25480000
chr17	25630000	25640000
chr17	25750000	25760000
chr17	25780000	25800000
chr17	26050000	26060000
chr17	26150000	26170000
chr17	26180000	26190000
chr17	27800000	27810000
chr17	28010000	28020000
chr17	28050000	28060000
chr17	28080000	28100000
chr17	28160000	28170000
chr17	28220000	28230000
chr17	28240000	28260000
chr17	28320000	28330000
chr17	28480000	28490000
chr17	28500000	28510000
chr17	29530000	29550000
chr17	29670000	29680000
chr17	31110000	31120000
chr17	31140000	31150000
chr17	31200000	31210000
chr17	32520000	32530000
chr17	32630000	32650000
chr17	33620000	33630000
chr17	33640000	33650000
chr17	33670000	33710000
chr17	33730000	33790000
chr17	37930000	37940000
chr17	37960000	37970000
chr17	38000000	38020000
chr17	38290000	38300000
chr17	38320000	38330000
chr17	38550000	38560000
chr17	38880000	38890000
chr17	39150000	39160000
chr17	39230000	39240000
chr17	39250000	39260000
chr17	39280000	39320000
chr17	39330000	39340000
chr17	39370000	39380000
chr17	39410000	39420000
chr17	39450000	39460000
chr17	40420000	40430000
chr17	40470000	40520000
chr17	40550000	40560000
chr17	43290000	43300000
chr17	43350000	43360000
chr17	43380000	43390000
chr17	43420000	43430000
chr17	44180000	44200000
chr17	44210000	44240000
chr17	45390000	45400000
chr17	45420000	45430000
chr17	46450000	46510000
chr17	46530000	46580000
chr17	46950000	46960000
chr17	47390000	47400000
chr17	48930000	48940000
chr17	49030000	49050000
chr17	49070000	49090000
chr17	49100000	49110000
chr17	49130000	49150000
chr17	49640000	49650000
chr17	50050000	50070000
chr17	50440000	50450000
chr17	50570000	50580000
chr17	50790000	50800000
chr17	50870000	50880000
chr17	50920000	50930000
chr17	51010000	51050000
chr17	51080000	51090000
chr17	51180000	51210000
chr17	51270000	51280000
chr17	51300000	51310000
chr17	51350000	51380000
chr17	51530000	51550000
chr17	51560000	51570000
chr17	51580000	51590000
chr17	51630000	51640000
chr17	51660000	51670000
chr17	51700000	51720000
chr17	51920000	51930000
chr17	51950000	51960000
chr17	52010000	52020000
chr17	52060000	52080000
chr17	52140000	52150000
chr17	52290000	52300000
chr17	52420000	52430000
chr17	52520000	52530000
chr17	52540000	52550000
chr17	52560000	52570000
chr17	52790000	52800000
chr17	53130000	53160000
chr17	53190000	53220000
chr17	53230000	53260000
chr17	53270000	53290000
chr17	53730000	53740000
chr17	53800000	53810000
chr17	54040000	54050000
chr17	54090000	54120000
chr17	54660000	54670000
chr17	55370000	55380000
chr17	55430000	55450000
chr17	55590000	55600000
chr17	56020000	56030000
chr17	56060000	56080000
chr17	56460000	56500000
chr17	56930000	56940000
chr17	57510000	57520000
chr17	57750000	57760000
chr17	57820000	57890000
chr17	57900000	57940000
chr17	58020000	58030000
chr17	58410000	58420000
chr17	58910000	58920000
chr17	58940000	58950000
chr17	59010000	59020000
chr17	59080000	59090000
chr17	59200000	59210000
chr17	59230000	59250000
chr17	59710000	59720000
chr17	59730000	59740000
chr17	59780000	59790000
chr17	59880000	59890000
chr17	61160000	61170000
chr17	61350000	61360000
chr17	62150000	62160000
chr17	62200000	62210000
chr17	62650000	62660000
chr17	62960000	62980000
chr17	63010000	63030000
chr17	63090000	63100000
chr17	63810000	63820000
chr17	66250000	66270000
chr17	66280000	66290000
chr17	66900000	66910000
chr17	66920000	66940000
chr17	66960000	66980000
chr17	66990000	67000000
chr17	67010000	67020000
chr17	67040000	67050000
chr17	67070000	67090000
chr17	67110000	67170000
chr17	67730000	67740000
chr17	67750000	67770000
chr17	67800000	67810000
chr17	67840000	67850000
chr17	67870000	67880000
chr17	67910000	67920000
chr17	67930000	67940000
chr17	68010000	68020000
chr17	68030000	68040000
chr17	68180000	68220000
chr17	68230000	68250000
chr17	68270000	68290000
chr17	68300000	68310000
chr17	68320000	68330000
chr17	68350000	68380000
chr17	68400000	68420000
chr17	68430000	68450000
chr17	68500000	68510000
chr17	68540000	68550000
chr17	68860000	68870000
chr17	68930000	68950000
chr17	68960000	68970000
chr17	68990000	69000000
chr17	69260000	69270000
chr17	69280000	69290000
chr17	69710000	69720000
chr17	72480000	72490000
chr17	73130000	73150000
chr17	73170000	73180000
chr17	73310000	73320000
chr17	73330000	73350000
chr17	73380000	73410000
chr17	74150000	74170000
chr17	74180000	74190000
chr17	74200000	74210000
chr17	74540000	74560000
chr17	74590000	74600000
chr17	75160000	75170000
chr17	76280000	76290000
chr17	76350000	76360000
chr17	76370000	76380000
chr17	80090000	80100000
chr17	80310000	80320000
chr17	80370000	80380000
chr17	80470000	80490000
chr17	80500000	80510000
chr17	80790000	80800000
chr17	80830000	80840000
chr17	80850000	80860000
chr17	80870000	80880000
chr17	80930000	80960000
chr17	81090000	81120000
chr18	2680000	2690000
chr18	2980000	2990000
chr18	3320000	3330000
chr18	3440000	3450000
chr18	9150000	9160000
chr18	12880000	12890000
chr18	60980000	60990000
chr18	74770000	74780000
chr19	700000	710000
chr19	850000	870000
chr19	910000	940000
chr19	980000	990000
chr19	1020000	1050000
chr19	1060000	1080000
chr19	1090000	1120000
chr19	1130000	1140000
chr19	1170000	1200000
chr19	2000000	2010000
chr19	2020000	2030000
chr19	2060000	2070000
chr19	2080000	2100000
chr19	2150000	2170000
chr19	2230000	2240000
chr19	2250000	2260000
chr19	2470000	2480000
chr19	2500000	2510000
chr19	2520000	2540000
chr19	2550000	2570000
chr19	2580000	2590000
chr19	2600000	2610000
chr19	3050000	3060000
chr19	3070000	3080000
chr19	3320000	3330000
chr19	4400000	4410000
chr19	4630000	4640000
chr19	4860000	4870000
chr19	4880000	4890000
chr19	4910000	4920000
chr19	4960000	4970000
chr19	6110000	6120000
chr19	6570000	6580000
chr19	6610000	6620000
chr19	6630000	6660000
chr19	6670000	6690000
chr19	7290000	7300000
chr19	7740000	7750000
chr19	7810000	7820000
chr19	8510000	8530000
chr19	9800000	9810000
chr19	10380000	10390000
chr19	10490000	10500000
chr19	10690000	10720000
chr19	10750000	10770000
chr19	10820000	10830000
chr19	10840000	10850000
chr19	10880000	10890000
chr19	11390000	11410000
chr19	11900000	11910000
chr19	12030000	12040000
chr19	12090000	12110000
chr19	12190000	12200000
chr19	12870000	12880000
chr19	13590000	13600000
chr19	14140000	14150000
chr19	15380000	15400000
chr19	15430000	15440000
chr19	15460000	15470000
chr19	15490000	15500000
chr19	15850000	15870000
chr19	16010000	16020000
chr19	16060000	16070000
chr19	16150000	16160000
chr19	16350000	16370000
chr19	16440000	16480000
chr19	16490000	16510000
chr19	17060000	17070000
chr19	17230000	17250000
chr19	18100000	18120000
chr19	18160000	18170000
chr19	18310000	18320000
chr19	18360000	18370000
chr19	18430000	18440000
chr19	18590000	18610000
chr19	18630000	18640000
chr19	18660000	18670000
chr19	18690000	18700000
chr19	19890000	19900000
chr19	20000000	20010000
chr19	20680000	20690000
chr19	22320000	22330000
chr19	22380000	22390000
chr19	22510000	22520000
chr19	22530000	22540000
chr19	22890000	22900000
chr19	23140000	23150000
chr19	23480000	23500000
chr19	23530000	23540000
chr19	24110000	24120000
chr19	24430000	24440000
chr19	24510000	24520000
chr19	27920000	27950000
chr19	27980000	27990000
chr19	28010000	28020000
chr19	28040000	28050000
chr19	28070000	28080000
chr19	28110000	28120000
chr19	28140000	28180000
chr19	28200000	28230000
chr19	28440000	28450000
chr19	28560000	28580000
chr19	28590000	28610000
chr19	28620000	28640000
chr19	28650000	28660000
chr19	28740000	28750000
chr19	28760000	28770000
chr19	28830000	28850000
chr19	28860000	28870000
chr19	28900000	28910000
chr19	28950000	28960000
chr19	29150000	29160000
chr19	29260000	29280000
chr19	29660000	29670000
chr19	29850000	29860000
chr19	29950000	29970000
chr19	30300000	30310000
chr19	30340000	30350000
chr19	30360000	30370000
chr19	30390000	30400000
chr19	30460000	30530000
chr19	31470000	31480000
chr19	31500000	31530000
chr19	31560000	31590000
chr19	31620000	31630000
chr19	31650000	31660000
chr19	31670000	31730000
chr19	31950000	31960000
chr19	32010000	32020000
chr19	32060000	32070000
chr19	32100000	32110000
chr19	32140000	32150000
chr19	32170000	32180000
chr19	32220000	32260000
chr19	32300000	32310000
chr19	32340000	32360000
chr19	32490000	32500000
chr19	32620000	32630000
chr19	32850000	32870000
chr19	32950000	32960000
chr19	32990000	33000000
chr19	33180000	33190000
chr19	33250000	33260000
chr19	33290000	33300000
chr19	33720000	33730000
chr19	33740000	33750000
chr19	33820000	33830000
chr19	33840000	33850000
chr19	33860000	33880000
chr19	34060000	34070000
chr19	34330000	34350000
chr19	34430000	34440000
chr19	34460000	34470000
chr19	34480000	34490000
chr19	34510000	34520000
chr19	35690000	35700000
chr19	35730000	35740000
chr19	35860000	35880000
chr19	35900000	35910000
chr19	35920000	35930000
chr19	35950000	35960000
chr19	38490000	38500000
chr19	39260000	39270000
chr19	40160000	40170000
chr19	40520000	40530000
chr19	40560000	40570000
chr19	40630000	40640000
chr19	41500000	41510000
chr19	41580000	41590000
chr19	41960000	41970000
chr19	42040000	42080000
chr19	42140000	42150000
chr19	42680000	42700000
chr19	42740000	42750000
chr19	42950000	42960000
chr19	43020000	43040000
chr19	43950000	43960000
chr19	44530000	44560000
chr19	44570000	44580000
chr19	44690000	44700000
chr19	44790000	44800000
chr19	44820000	44830000
chr19	44850000	44860000
chr19	45220000	45230000
chr19	45270000	45280000
chr19	45940000	45950000
chr19	45980000	45990000
chr19	46030000	46050000
chr19	46070000	46080000
chr19	46550000	46600000
chr19	46610000	46640000
chr19	46650000	46660000
chr19	46680000	46700000
chr19	46740000	46750000
chr19	46940000	46960000
chr19	46980000	46990000
chr19	47160000	47170000
chr19	47350000	47360000
chr19	47370000	47420000
chr19	47450000	47470000
chr19	47610000	47620000
chr19	47630000	47640000
chr19	47650000	47670000
chr19	47710000	47720000
chr19	47740000	47750000
chr19	47890000	47900000
chr19	48060000	48070000
chr19	48080000	48090000
chr19	48130000	48140000
chr19	49290000	49300000
chr19	49330000	49350000
chr19	49700000	49710000
chr19	49800000	49810000
chr19	50050000	50060000
chr19	52120000	52130000
chr19	54730000	54740000
chr19	55120000	55130000
chr19	55150000	55160000
chr19	55810000	55820000
chr19	56730000	56740000
chr19	57290000	57300000
chr19	58920000	58930000
chr20	190000	210000
chr20	440000	450000
chr20	460000	480000
chr20	490000	500000
chr20	930000	940000
chr20	1340000	1360000
chr20	1410000	1420000
chr20	1520000	1530000
chr20	1870000	1880000
chr20	1960000	1970000
chr20	2940000	2950000
chr20	3350000	3360000
chr20	3370000	3380000
chr20	3490000	3500000
chr20	3890000	3900000
chr20	3910000	3940000
chr20	3950000	3960000
chr20	3970000	3980000
chr20	3990000	4000000
chr20	4010000	4020000
chr20	4370000	4390000
chr20	4440000	4450000
chr20	4740000	4750000
chr20	4810000	4820000
chr20	4930000	4940000
chr20	5570000	5580000
chr20	5700000	5710000
chr20	6340000	6350000
chr20	6850000	6860000
chr20	6960000	6980000
chr20	7200000	7210000
chr20	7400000	7410000
chr20	7430000	7440000
chr20	7470000	7480000
chr20	7560000	7570000
chr20	7590000	7600000
chr20	8150000	8160000
chr20	8200000	8210000
chr20	8260000	8290000
chr20	8300000	8310000
chr20	8330000	8340000
chr20	8420000	8450000
chr20	8850000	8860000
chr20	9140000	9150000
chr20	9950000	9960000
chr20	10470000	10480000
chr20	10530000	10540000
chr20	10800000	10810000
chr20	10940000	10950000
chr20	10980000	10990000
chr20	11020000	11030000
chr20	11070000	11080000
chr20	11120000	11130000
chr20	11310000	11320000
chr20	11430000	11440000
chr20	11860000	11870000
chr20	12060000	12070000
chr20	12180000	12190000
chr20	12550000	12560000
chr20	13490000	13500000
chr20	14380000	14390000
chr20	14470000	14480000
chr20	14620000	14630000
chr20	14810000	14830000
chr20	15180000	15190000
chr20	15970000	15980000
chr20	16060000	16070000
chr20	16300000	16310000
chr20	17080000	17090000
chr20	18750000	18760000
chr20	18940000	18950000
chr20	20640000	20650000
chr20	21340000	21350000
chr20	22050000	22060000
chr20	22110000	22120000
chr20	22370000	22380000
chr20	23060000	23070000
chr20	23120000	23130000
chr20	23170000	23180000
chr20	32120000	32140000
chr20	32200000	32210000
chr20	32640000	32650000
chr20	32970000	32980000
chr20	33040000	33050000
chr20	33060000	33070000
chr20	33100000	33110000
chr20	33160000	33170000
chr20	33190000	33200000
chr20	33210000	33220000
chr20	33490000	33500000
chr20	33620000	33630000
chr20	34280000	34310000
chr20	34580000	34590000
chr20	34630000	34640000
chr20	34720000	34730000
chr20	35310000	35320000
chr20	38630000	38640000
chr20	38660000	38670000
chr20	38720000	38730000
chr20	39000000	39030000
chr20	39670000	39680000
chr20	42510000	42520000
chr20	43850000	43860000
chr20	45520000	45530000
chr20	46060000	46070000
chr20	46130000	46140000
chr20	46180000	46190000
chr20	46200000	46210000
chr20	47330000	47340000
chr20	47390000	47410000
chr20	47430000	47450000
chr20	47460000	47480000
chr20	48290000	48350000
chr20	48360000	48390000
chr20	48420000	48440000
chr20	48860000	48890000
chr20	48920000	48970000
chr20	48980000	49010000
chr20	51410000	51420000
chr20	52240000	52250000
chr20	52270000	52280000
chr20	52300000	52330000
chr20	52340000	52380000
chr20	52390000	52410000
chr20	52430000	52450000
chr20	52460000	52470000
chr20	52480000	52490000
chr20	53020000	53040000
chr20	53760000	53770000
chr20	53780000	53790000
chr20	53860000	53870000
chr20	53910000	53920000
chr20	53970000	53990000
chr20	54030000	54040000
chr20	54350000	54360000
chr20	57600000	57610000
chr20	62490000	62500000
chr21	15890000	15930000
chr21	15960000	15970000
chr21	30600000	30610000
chr21	34730000	34740000
chr21	36420000	36430000
chr21	36590000	36600000
chr22	17460000	17470000
chr22	17750000	17760000
chr22	17800000	17830000
chr22	17850000	17860000
chr22	17880000	17920000
chr22	18090000	18100000
chr22	18390000	18400000
chr22	18430000	18440000
chr22	22160000	22170000
chr22	22200000	22210000
chr22	22230000	22240000
chr22	23180000	23190000
chr22	24710000	24730000
chr22	24870000	24880000
chr22	25960000	25970000
chr22	25980000	25990000
chr22	28580000	28590000
chr22	28600000	28610000
chr22	28640000	28670000
chr22	30250000	30270000
chr22	30290000	30320000
chr22	30340000	30350000
chr22	30510000	30520000
chr22	30590000	30600000
chr22	30680000	30690000
chr22	31600000	31620000
chr22	33040000	33050000
chr22	34240000	34250000
chr22	34420000	34430000
chr22	34930000	34940000
chr22	36140000	36160000
chr22	36180000	36200000
chr22	36210000	36270000
chr22	36320000	36330000
chr22	36720000	36790000
chr22	36810000	36820000
chr22	37250000	37260000
chr22	37290000	37310000
chr22	37340000	37370000
chr22	37650000	37670000
chr22	37710000	37720000
chr22	38070000	38080000
chr22	38550000	38560000
chr22	38570000	38580000
chr22	38630000	38640000
chr22	38650000	38660000
chr22	39330000	39340000
chr22	39510000	39520000
chr22	40140000	40170000
chr22	40180000	40190000
chr22	40210000	40220000
chr22	40230000	40250000
chr22	40260000	40290000
chr22	40310000	40320000
chr22	40460000	40470000
chr22	40510000	40520000
chr22	40570000	40620000
chr22	40630000	40650000
chr22	40850000	40870000
chr22	40880000	40890000
chr22	40900000	40910000
chr22	40920000	40940000
chr22	40990000	41020000
chr22	41410000	41420000
chr22	41440000	41450000
chr22	41460000	41470000
chr22	41480000	41500000
chr22	41510000	41520000
chr22	41550000	41560000
chr22	42140000	42160000
chr22	42240000	42260000
chr22	42580000	42590000
chr22	42610000	42640000
chr22	42660000	42670000
chr22	43330000	43340000
chr22	43350000	43370000
chr22	43390000	43400000
chr22	44080000	44090000
chr22	45660000	45670000
chr22	46070000	46090000
chr22	46120000	46150000
chr22	46170000	46180000
chr22	46220000	46230000
chr22	48260000	48270000
chr22	48350000	48360000
chr22	48380000	48390000
chr22	48400000	48410000
chr22	49120000	49130000
chr22	50410000	50430000
chr22	50570000	50580000
chr22	50760000	50770000
chr22	50780000	50790000
chr22	50850000	50870000
chr22	50930000	50950000
chr22	50970000	50980000
chr22	51000000	51010000
chr22	51020000	51040000

## Sheet: S024_R2
Supplementary Table S6: FIREs called by FIREcaller from HiC libraries
chr	Start	End
chr1	1700000	1710000
chr1	2580000	2590000
chr1	16200000	16210000
chr1	17500000	17510000
chr1	17560000	17580000
chr1	21410000	21430000
chr1	23860000	23870000
chr1	24160000	24170000
chr1	24240000	24250000
chr1	26940000	26960000
chr1	26970000	26980000
chr1	27000000	27030000
chr1	27110000	27120000
chr1	27430000	27440000
chr1	27710000	27720000
chr1	28280000	28290000
chr1	28410000	28420000
chr1	28430000	28510000
chr1	28570000	28580000
chr1	32360000	32380000
chr1	32400000	32410000
chr1	33470000	33480000
chr1	33490000	33500000
chr1	36610000	36620000
chr1	36680000	36690000
chr1	36720000	36730000
chr1	36760000	36770000
chr1	36810000	36840000
chr1	36850000	36870000
chr1	36880000	36890000
chr1	36910000	36930000
chr1	40610000	40620000
chr1	40670000	40680000
chr1	40720000	40730000
chr1	40800000	40810000
chr1	42140000	42150000
chr1	48730000	48740000
chr1	50280000	50290000
chr1	59320000	59330000
chr1	59750000	59760000
chr1	59820000	59830000
chr1	59850000	59870000
chr1	59910000	59940000
chr1	59960000	59990000
chr1	60010000	60020000
chr1	60030000	60040000
chr1	66730000	66750000
chr1	66770000	66820000
chr1	66830000	66850000
chr1	66860000	66870000
chr1	66900000	66910000
chr1	69330000	69340000
chr1	69370000	69380000
chr1	69480000	69490000
chr1	69840000	69850000
chr1	70320000	70330000
chr1	72580000	72590000
chr1	73410000	73420000
chr1	73490000	73500000
chr1	73520000	73550000
chr1	73690000	73740000
chr1	73750000	73760000
chr1	73780000	73790000
chr1	73830000	73840000
chr1	73890000	73900000
chr1	73930000	73940000
chr1	73970000	73980000
chr1	74150000	74160000
chr1	74370000	74380000
chr1	74700000	74710000
chr1	74780000	74790000
chr1	79890000	79900000
chr1	80040000	80050000
chr1	80090000	80100000
chr1	80170000	80180000
chr1	80300000	80320000
chr1	80380000	80390000
chr1	80450000	80470000
chr1	80520000	80530000
chr1	80540000	80560000
chr1	80800000	80810000
chr1	80900000	80910000
chr1	80990000	81010000
chr1	81170000	81180000
chr1	81250000	81260000
chr1	81390000	81400000
chr1	82380000	82390000
chr1	83330000	83340000
chr1	83360000	83370000
chr1	83500000	83510000
chr1	87260000	87270000
chr1	88300000	88310000
chr1	89550000	89560000
chr1	89610000	89620000
chr1	89690000	89700000
chr1	95100000	95110000
chr1	96080000	96090000
chr1	96350000	96360000
chr1	96800000	96810000
chr1	97660000	97670000
chr1	98300000	98310000
chr1	102580000	102590000
chr1	102750000	102760000
chr1	102850000	102860000
chr1	102890000	102900000
chr1	103120000	103140000
chr1	103150000	103180000
chr1	103390000	103400000
chr1	103490000	103500000
chr1	104530000	104550000
chr1	104570000	104580000
chr1	104600000	104610000
chr1	104940000	104960000
chr1	105180000	105190000
chr1	105430000	105440000
chr1	105460000	105470000
chr1	105490000	105500000
chr1	105520000	105530000
chr1	105550000	105600000
chr1	105630000	105640000
chr1	105720000	105740000
chr1	105810000	105830000
chr1	105860000	105870000
chr1	105880000	105910000
chr1	106050000	106060000
chr1	106220000	106230000
chr1	106260000	106280000
chr1	106350000	106360000
chr1	106520000	106530000
chr1	106680000	106700000
chr1	106780000	106790000
chr1	106810000	106830000
chr1	107050000	107060000
chr1	107270000	107310000
chr1	107320000	107330000
chr1	108460000	108470000
chr1	108500000	108510000
chr1	112050000	112060000
chr1	112160000	112170000
chr1	114050000	114060000
chr1	114350000	114360000
chr1	114440000	114450000
chr1	117050000	117070000
chr1	118590000	118600000
chr1	119050000	119060000
chr1	119130000	119140000
chr1	119220000	119230000
chr1	145420000	145430000
chr1	145450000	145460000
chr1	150040000	150060000
chr1	150130000	150140000
chr1	150540000	150560000
chr1	150570000	150590000
chr1	150660000	150670000
chr1	151130000	151140000
chr1	153370000	153380000
chr1	153480000	153490000
chr1	153500000	153510000
chr1	153530000	153550000
chr1	153890000	153900000
chr1	154370000	154380000
chr1	154390000	154410000
chr1	158390000	158400000
chr1	159420000	159430000
chr1	160650000	160660000
chr1	160700000	160710000
chr1	161030000	161040000
chr1	163630000	163640000
chr1	163650000	163670000
chr1	163820000	163840000
chr1	169570000	169580000
chr1	169680000	169690000
chr1	170210000	170220000
chr1	174810000	174820000
chr1	182160000	182170000
chr1	182200000	182210000
chr1	183550000	183560000
chr1	183590000	183600000
chr1	184790000	184800000
chr1	184830000	184850000
chr1	185280000	185350000
chr1	185360000	185420000
chr1	185440000	185510000
chr1	185550000	185560000
chr1	186580000	186590000
chr1	186640000	186650000
chr1	187310000	187320000
chr1	187580000	187600000
chr1	187650000	187660000
chr1	188130000	188140000
chr1	188230000	188240000
chr1	188410000	188420000
chr1	188860000	188880000
chr1	188900000	188910000
chr1	188970000	188980000
chr1	189010000	189020000
chr1	189220000	189240000
chr1	189340000	189350000
chr1	189410000	189420000
chr1	189540000	189550000
chr1	189710000	189720000
chr1	189810000	189820000
chr1	189990000	190000000
chr1	190210000	190220000
chr1	190240000	190250000
chr1	190420000	190430000
chr1	190490000	190500000
chr1	190580000	190600000
chr1	190620000	190630000
chr1	190970000	190980000
chr1	191080000	191090000
chr1	191100000	191110000
chr1	191250000	191260000
chr1	191270000	191280000
chr1	191300000	191310000
chr1	191370000	191380000
chr1	191420000	191430000
chr1	191490000	191500000
chr1	191970000	191980000
chr1	192830000	192840000
chr1	192860000	192880000
chr1	192890000	192910000
chr1	192950000	192960000
chr1	194620000	194630000
chr1	194640000	194650000
chr1	194660000	194670000
chr1	194700000	194710000
chr1	194730000	194740000
chr1	194820000	194830000
chr1	194840000	194850000
chr1	194910000	194920000
chr1	194950000	194960000
chr1	195000000	195020000
chr1	195090000	195100000
chr1	195130000	195150000
chr1	195190000	195200000
chr1	195250000	195290000
chr1	195560000	195570000
chr1	195590000	195600000
chr1	195780000	195790000
chr1	196200000	196210000
chr1	198290000	198310000
chr1	198510000	198530000
chr1	198550000	198560000
chr1	198580000	198600000
chr1	198610000	198620000
chr1	198630000	198660000
chr1	199550000	199560000
chr1	206750000	206760000
chr1	207470000	207500000
chr1	207510000	207520000
chr1	207530000	207540000
chr1	207580000	207590000
chr1	207750000	207760000
chr1	209820000	209870000
chr1	209920000	209930000
chr1	212920000	212930000
chr1	215480000	215490000
chr1	216200000	216210000
chr1	218170000	218180000
chr1	219240000	219250000
chr1	221170000	221190000
chr1	221200000	221290000
chr1	229160000	229170000
chr1	229200000	229220000
chr1	229260000	229270000
chr1	234780000	234830000
chr1	234860000	234880000
chr1	234900000	234910000
chr1	234970000	235020000
chr1	235040000	235100000
chr1	235110000	235130000
chr1	235140000	235150000
chr1	235180000	235190000
chr1	236040000	236060000
chr1	236080000	236090000
chr1	236110000	236120000
chr1	237180000	237190000
chr1	238640000	238650000
chr1	238800000	238810000
chr1	238900000	238910000
chr1	246790000	246800000
chr1	247380000	247390000
chr1	247550000	247560000
chr1	247860000	247870000
chr1	248050000	248070000
chr1	248220000	248230000
chr1	248260000	248280000
chr1	248340000	248350000
chr1	248570000	248580000
chr2	3570000	3590000
chr2	4770000	4780000
chr2	8530000	8540000
chr2	8620000	8640000
chr2	10460000	10490000
chr2	12650000	12660000
chr2	12670000	12680000
chr2	13490000	13510000
chr2	13520000	13530000
chr2	13540000	13550000
chr2	13600000	13610000
chr2	14020000	14040000
chr2	21420000	21430000
chr2	28110000	28120000
chr2	28140000	28150000
chr2	28170000	28190000
chr2	28280000	28300000
chr2	28410000	28420000
chr2	28580000	28590000
chr2	28610000	28620000
chr2	28630000	28640000
chr2	28660000	28690000
chr2	28810000	28820000
chr2	28970000	28980000
chr2	35940000	35950000
chr2	37760000	37770000
chr2	37840000	37850000
chr2	37870000	37910000
chr2	40650000	40660000
chr2	41200000	41210000
chr2	42340000	42350000
chr2	42390000	42400000
chr2	42420000	42450000
chr2	43350000	43370000
chr2	43390000	43400000
chr2	43450000	43460000
chr2	51170000	51180000
chr2	51430000	51440000
chr2	52340000	52350000
chr2	55260000	55280000
chr2	56650000	56660000
chr2	57280000	57290000
chr2	57320000	57330000
chr2	64340000	64380000
chr2	64410000	64420000
chr2	64440000	64460000
chr2	64480000	64510000
chr2	64870000	64890000
chr2	64950000	64960000
chr2	64970000	64980000
chr2	68590000	68600000
chr2	68610000	68620000
chr2	68650000	68670000
chr2	68940000	68950000
chr2	68960000	69020000
chr2	69050000	69070000
chr2	70140000	70190000
chr2	70200000	70340000
chr2	74250000	74260000
chr2	77500000	77510000
chr2	78410000	78420000
chr2	82830000	82850000
chr2	85760000	85790000
chr2	86880000	86890000
chr2	102350000	102360000
chr2	102520000	102540000
chr2	102630000	102640000
chr2	102680000	102720000
chr2	102740000	102750000
chr2	102770000	102810000
chr2	102830000	102860000
chr2	102870000	102880000
chr2	102900000	102920000
chr2	102950000	102960000
chr2	104260000	104270000
chr2	113400000	113410000
chr2	113440000	113470000
chr2	113480000	113520000
chr2	113540000	113570000
chr2	113580000	113600000
chr2	115770000	115780000
chr2	116470000	116480000
chr2	116530000	116540000
chr2	116920000	116930000
chr2	117570000	117580000
chr2	120680000	120690000
chr2	121040000	121050000
chr2	126440000	126450000
chr2	134290000	134300000
chr2	136740000	136750000
chr2	136760000	136770000
chr2	136800000	136810000
chr2	136820000	136830000
chr2	136860000	136900000
chr2	136960000	136980000
chr2	136990000	137000000
chr2	141080000	141090000
chr2	141280000	141290000
chr2	141690000	141700000
chr2	143860000	143870000
chr2	143880000	143890000
chr2	143910000	143920000
chr2	145170000	145190000
chr2	145210000	145220000
chr2	145260000	145290000
chr2	145360000	145370000
chr2	145400000	145410000
chr2	145420000	145430000
chr2	145450000	145470000
chr2	145520000	145560000
chr2	145570000	145580000
chr2	146940000	146950000
chr2	156350000	156360000
chr2	158260000	158270000
chr2	158290000	158300000
chr2	160370000	160380000
chr2	162010000	162020000
chr2	163630000	163640000
chr2	171910000	171920000
chr2	178100000	178120000
chr2	185060000	185070000
chr2	186820000	186830000
chr2	192500000	192510000
chr2	193440000	193450000
chr2	193470000	193480000
chr2	193730000	193740000
chr2	194580000	194590000
chr2	194700000	194710000
chr2	194800000	194820000
chr2	194850000	194860000
chr2	197030000	197040000
chr2	197070000	197080000
chr2	197100000	197110000
chr2	198100000	198110000
chr2	198170000	198180000
chr2	201980000	202000000
chr2	202040000	202050000
chr2	214380000	214390000
chr2	219020000	219030000
chr2	219080000	219100000
chr2	219130000	219140000
chr2	219150000	219170000
chr2	219210000	219230000
chr2	226630000	226640000
chr2	226950000	226960000
chr2	229270000	229280000
chr2	229790000	229800000
chr2	231320000	231330000
chr2	237790000	237810000
chr2	240140000	240160000
chr2	240320000	240330000
chr2	240370000	240380000
chr2	240810000	240820000
chr3	980000	990000
chr3	1390000	1400000
chr3	4810000	4820000
chr3	4840000	4880000
chr3	4890000	4910000
chr3	4920000	4930000
chr3	4990000	5000000
chr3	5010000	5030000
chr3	5050000	5060000
chr3	6120000	6130000
chr3	20650000	20660000
chr3	30440000	30460000
chr3	30650000	30660000
chr3	35100000	35120000
chr3	38190000	38210000
chr3	39190000	39200000
chr3	39280000	39290000
chr3	46130000	46150000
chr3	46170000	46180000
chr3	46200000	46280000
chr3	46310000	46320000
chr3	48480000	48490000
chr3	49390000	49400000
chr3	53170000	53180000
chr3	66160000	66180000
chr3	71820000	71840000
chr3	71900000	71910000
chr3	72520000	72530000
chr3	82430000	82440000
chr3	82800000	82810000
chr3	82870000	82880000
chr3	84300000	84310000
chr3	84440000	84450000
chr3	88660000	88670000
chr3	89780000	89790000
chr3	94880000	94890000
chr3	94960000	94970000
chr3	95240000	95250000
chr3	95260000	95270000
chr3	95470000	95480000
chr3	95760000	95770000
chr3	96180000	96190000
chr3	101620000	101630000
chr3	101650000	101680000
chr3	102950000	102960000
chr3	103450000	103460000
chr3	103500000	103510000
chr3	103710000	103720000
chr3	103930000	103950000
chr3	104070000	104080000
chr3	104090000	104110000
chr3	104690000	104700000
chr3	104760000	104770000
chr3	104870000	104880000
chr3	117910000	117920000
chr3	128450000	128460000
chr3	128470000	128480000
chr3	128490000	128510000
chr3	141240000	141250000
chr3	141270000	141280000
chr3	145560000	145570000
chr3	151040000	151050000
chr3	151070000	151080000
chr3	151950000	151970000
chr3	151980000	152000000
chr3	152010000	152020000
chr3	162510000	162520000
chr3	162620000	162630000
chr3	162850000	162860000
chr3	162970000	162980000
chr3	163010000	163020000
chr3	163030000	163040000
chr3	163090000	163100000
chr3	163430000	163450000
chr3	164320000	164340000
chr3	164590000	164600000
chr3	164630000	164640000
chr3	164680000	164690000
chr3	165200000	165210000
chr3	165230000	165240000
chr3	165760000	165770000
chr3	166010000	166020000
chr3	166150000	166160000
chr3	166260000	166270000
chr3	166300000	166330000
chr3	166360000	166370000
chr3	166380000	166400000
chr3	166510000	166520000
chr3	171680000	171710000
chr3	171750000	171940000
chr3	171950000	171960000
chr3	171990000	172000000
chr3	174780000	174790000
chr3	175020000	175030000
chr3	175170000	175190000
chr3	175380000	175390000
chr3	175720000	175730000
chr3	175840000	175860000
chr3	175910000	175920000
chr3	176010000	176030000
chr3	176050000	176070000
chr3	176910000	176920000
chr3	177050000	177080000
chr3	177120000	177130000
chr3	177140000	177180000
chr3	177250000	177260000
chr3	177650000	177670000
chr3	177760000	177770000
chr3	182970000	182980000
chr3	182990000	183030000
chr3	187490000	187500000
chr3	187550000	187610000
chr3	187630000	187650000
chr3	187660000	187740000
chr3	187800000	187810000
chr3	187880000	187890000
chr3	188100000	188110000
chr3	188200000	188210000
chr3	188270000	188280000
chr3	189370000	189380000
chr3	190280000	190290000
chr3	190300000	190310000
chr3	190330000	190350000
chr3	191530000	191540000
chr3	195230000	195240000
chr4	6780000	6810000
chr4	6850000	6860000
chr4	6880000	6900000
chr4	6910000	6920000
chr4	6930000	6950000
chr4	12060000	12070000
chr4	15650000	15670000
chr4	15700000	15710000
chr4	26200000	26210000
chr4	26220000	26230000
chr4	26250000	26310000
chr4	40550000	40590000
chr4	40600000	40640000
chr4	46020000	46030000
chr4	49090000	49100000
chr4	49140000	49150000
chr4	74570000	74630000
chr4	74670000	74700000
chr4	74710000	74720000
chr4	74730000	74740000
chr4	74770000	74790000
chr4	80980000	81000000
chr4	81020000	81030000
chr4	81040000	81050000
chr4	81060000	81070000
chr4	81100000	81110000
chr4	84030000	84050000
chr4	84070000	84080000
chr4	84130000	84160000
chr4	84170000	84180000
chr4	92270000	92280000
chr4	105950000	105970000
chr4	106040000	106050000
chr4	129830000	129840000
chr4	140850000	140860000
chr4	161990000	162000000
chr4	169310000	169320000
chr4	169350000	169360000
chr4	169370000	169380000
chr4	169390000	169400000
chr4	169430000	169440000
chr4	174250000	174260000
chr4	179250000	179260000
chr4	185220000	185230000
chr4	185260000	185340000
chr4	185370000	185400000
chr4	185690000	185790000
chr4	185810000	185830000
chr4	187890000	187900000
chr4	190440000	190450000
chr4	190580000	190590000
chr5	550000	580000
chr5	1450000	1460000
chr5	1470000	1520000
chr5	1560000	1570000
chr5	3190000	3200000
chr5	10440000	10450000
chr5	10500000	10510000
chr5	10560000	10610000
chr5	10620000	10650000
chr5	12290000	12300000
chr5	12330000	12340000
chr5	13160000	13170000
chr5	17230000	17240000
chr5	17250000	17270000
chr5	17400000	17440000
chr5	17600000	17610000
chr5	17680000	17690000
chr5	17710000	17720000
chr5	17810000	17830000
chr5	17950000	17990000
chr5	19060000	19070000
chr5	19120000	19130000
chr5	19150000	19160000
chr5	19510000	19520000
chr5	19670000	19680000
chr5	19990000	20000000
chr5	20420000	20430000
chr5	22370000	22390000
chr5	23650000	23660000
chr5	25320000	25330000
chr5	26780000	26790000
chr5	27890000	27900000
chr5	28090000	28100000
chr5	28240000	28250000
chr5	29300000	29310000
chr5	29660000	29670000
chr5	30530000	30540000
chr5	33120000	33130000
chr5	39210000	39230000
chr5	40430000	40450000
chr5	40480000	40490000
chr5	40520000	40530000
chr5	40550000	40560000
chr5	42950000	42960000
chr5	42990000	43050000
chr5	43060000	43070000
chr5	45290000	45300000
chr5	45850000	45860000
chr5	46100000	46110000
chr5	51050000	51060000
chr5	53890000	53920000
chr5	53960000	53980000
chr5	82660000	82670000
chr5	84290000	84300000
chr5	90450000	90460000
chr5	90470000	90490000
chr5	90500000	90520000
chr5	90570000	90580000
chr5	90590000	90610000
chr5	95170000	95180000
chr5	99000000	99010000
chr5	100000000	100010000
chr5	100040000	100050000
chr5	100070000	100080000
chr5	100530000	100540000
chr5	104660000	104680000
chr5	104690000	104700000
chr5	117520000	117530000
chr5	125190000	125200000
chr5	125240000	125250000
chr5	131040000	131050000
chr5	131790000	131810000
chr5	139940000	139950000
chr5	139990000	140000000
chr5	140010000	140020000
chr5	142140000	142160000
chr5	142170000	142190000
chr5	142200000	142220000
chr5	142260000	142270000
chr5	142300000	142320000
chr5	142340000	142360000
chr5	142370000	142380000
chr5	150430000	150440000
chr5	150460000	150480000
chr5	150490000	150500000
chr5	163420000	163430000
chr5	169690000	169740000
chr5	169750000	169770000
chr5	171610000	171620000
chr5	172190000	172210000
chr5	172220000	172250000
chr5	172260000	172280000
chr5	172290000	172320000
chr5	172380000	172390000
chr5	173200000	173220000
chr5	173240000	173260000
chr5	173310000	173320000
chr5	176740000	176750000
chr5	176760000	176770000
chr5	176780000	176790000
chr5	176800000	176850000
chr5	176880000	176890000
chr5	176900000	176910000
chr5	176920000	176940000
chr5	179100000	179110000
chr5	179120000	179150000
chr5	180340000	180350000
chr6	2780000	2800000
chr6	2810000	2820000
chr6	2830000	2860000
chr6	2900000	2910000
chr6	2920000	2940000
chr6	2950000	2960000
chr6	2990000	3000000
chr6	3020000	3030000
chr6	3050000	3060000
chr6	6850000	6860000
chr6	6880000	6890000
chr6	9460000	9470000
chr6	11220000	11230000
chr6	11310000	11400000
chr6	11410000	11430000
chr6	11440000	11450000
chr6	12100000	12110000
chr6	12130000	12140000
chr6	12150000	12160000
chr6	12200000	12220000
chr6	12230000	12250000
chr6	12280000	12290000
chr6	13200000	13220000
chr6	13270000	13280000
chr6	13300000	13310000
chr6	14720000	14760000
chr6	14910000	14930000
chr6	14950000	14960000
chr6	15060000	15070000
chr6	15080000	15100000
chr6	16610000	16630000
chr6	16680000	16700000
chr6	16710000	16730000
chr6	16750000	16760000
chr6	23070000	23080000
chr6	23360000	23370000
chr6	24930000	24940000
chr6	24990000	25000000
chr6	26150000	26160000
chr6	26170000	26180000
chr6	26190000	26260000
chr6	26270000	26290000
chr6	26360000	26370000
chr6	29850000	29860000
chr6	30450000	30460000
chr6	30510000	30530000
chr6	30580000	30590000
chr6	30630000	30660000
chr6	30680000	30720000
chr6	30740000	30770000
chr6	30780000	30800000
chr6	31230000	31240000
chr6	31280000	31290000
chr6	31320000	31340000
chr6	31390000	31410000
chr6	31510000	31530000
chr6	31550000	31560000
chr6	31620000	31650000
chr6	31670000	31680000
chr6	31690000	31710000
chr6	31730000	31750000
chr6	31760000	31770000
chr6	31780000	31800000
chr6	32440000	32460000
chr6	32480000	32560000
chr6	32800000	32810000
chr6	32850000	32860000
chr6	33210000	33220000
chr6	33290000	33300000
chr6	34250000	34260000
chr6	35290000	35300000
chr6	35310000	35320000
chr6	36060000	36070000
chr6	36080000	36100000
chr6	36110000	36130000
chr6	36160000	36170000
chr6	36400000	36410000
chr6	36440000	36450000
chr6	36480000	36490000
chr6	36560000	36570000
chr6	36640000	36650000
chr6	36720000	36730000
chr6	36990000	37000000
chr6	37010000	37020000
chr6	37130000	37150000
chr6	41190000	41210000
chr6	41230000	41260000
chr6	42370000	42380000
chr6	45040000	45050000
chr6	48470000	48490000
chr6	48880000	48890000
chr6	49290000	49300000
chr6	51620000	51630000
chr6	53160000	53170000
chr6	53180000	53190000
chr6	54430000	54440000
chr6	55510000	55520000
chr6	55550000	55560000
chr6	56030000	56040000
chr6	56070000	56080000
chr6	62410000	62420000
chr6	62720000	62730000
chr6	63280000	63290000
chr6	64110000	64120000
chr6	64170000	64180000
chr6	65540000	65550000
chr6	65960000	65970000
chr6	66460000	66470000
chr6	66720000	66740000
chr6	67000000	67010000
chr6	67080000	67100000
chr6	67160000	67170000
chr6	67830000	67840000
chr6	68000000	68010000
chr6	68040000	68050000
chr6	68080000	68090000
chr6	68140000	68150000
chr6	70050000	70060000
chr6	70160000	70170000
chr6	71900000	71910000
chr6	75440000	75450000
chr6	78310000	78320000
chr6	81290000	81300000
chr6	81580000	81590000
chr6	87360000	87370000
chr6	88410000	88420000
chr6	88440000	88450000
chr6	88460000	88470000
chr6	103780000	103790000
chr6	104360000	104370000
chr6	108940000	108950000
chr6	110160000	110170000
chr6	110220000	110230000
chr6	113480000	113490000
chr6	113730000	113740000
chr6	113760000	113770000
chr6	113800000	113810000
chr6	113820000	113850000
chr6	113860000	113870000
chr6	113900000	113980000
chr6	114010000	114030000
chr6	114080000	114110000
chr6	115040000	115050000
chr6	115390000	115400000
chr6	116680000	116690000
chr6	116700000	116720000
chr6	116730000	116800000
chr6	116830000	116840000
chr6	120780000	120790000
chr6	134550000	134580000
chr6	134600000	134640000
chr6	134670000	134680000
chr6	134690000	134730000
chr6	134860000	134870000
chr6	137470000	137490000
chr6	137530000	137570000
chr6	137590000	137600000
chr6	138030000	138060000
chr6	138090000	138100000
chr6	138110000	138170000
chr6	138180000	138210000
chr6	138220000	138230000
chr6	143140000	143150000
chr6	143200000	143210000
chr6	144420000	144430000
chr6	149630000	149650000
chr6	157600000	157610000
chr6	159460000	159490000
chr6	159510000	159530000
chr6	160120000	160130000
chr6	160140000	160150000
chr6	160380000	160410000
chr6	167630000	167640000
chr7	5560000	5570000
chr7	5590000	5610000
chr7	9040000	9070000
chr7	9150000	9160000
chr7	9230000	9250000
chr7	9320000	9350000
chr7	9450000	9460000
chr7	9590000	9610000
chr7	9720000	9730000
chr7	9960000	9970000
chr7	10040000	10050000
chr7	10220000	10240000
chr7	10810000	10820000
chr7	11990000	12000000
chr7	13450000	13480000
chr7	14300000	14310000
chr7	14730000	14740000
chr7	14990000	15000000
chr7	15030000	15040000
chr7	15610000	15620000
chr7	15640000	15650000
chr7	18110000	18120000
chr7	18130000	18140000
chr7	18150000	18160000
chr7	18180000	18190000
chr7	25640000	25650000
chr7	36750000	36760000
chr7	37700000	37710000
chr7	37720000	37740000
chr7	48020000	48030000
chr7	48550000	48570000
chr7	50260000	50270000
chr7	50360000	50370000
chr7	53850000	53860000
chr7	76870000	76880000
chr7	77030000	77040000
chr7	77050000	77060000
chr7	77090000	77100000
chr7	78530000	78540000
chr7	85940000	85950000
chr7	87890000	87900000
chr7	87940000	87960000
chr7	88570000	88580000
chr7	99940000	99950000
chr7	100200000	100210000
chr7	105900000	105960000
chr7	105970000	106110000
chr7	108730000	108740000
chr7	111600000	111610000
chr7	111670000	111680000
chr7	111690000	111700000
chr7	111720000	111730000
chr7	111760000	111780000
chr7	111830000	111840000
chr7	111880000	111910000
chr7	113210000	113220000
chr7	125500000	125510000
chr7	130870000	130880000
chr7	130900000	130910000
chr7	139550000	139560000
chr7	139950000	139960000
chr7	141640000	141650000
chr7	142100000	142110000
chr7	142130000	142140000
chr7	142160000	142170000
chr7	142460000	142470000
chr7	142940000	142950000
chr7	145470000	145480000
chr7	145510000	145520000
chr7	145540000	145550000
chr7	150280000	150290000
chr7	150310000	150320000
chr7	158130000	158140000
chr8	1330000	1350000
chr8	5190000	5200000
chr8	5230000	5240000
chr8	8890000	8900000
chr8	8920000	8930000
chr8	9000000	9010000
chr8	9920000	9930000
chr8	13930000	13950000
chr8	14050000	14060000
chr8	19480000	19490000
chr8	19510000	19520000
chr8	19530000	19560000
chr8	22920000	22930000
chr8	22940000	22950000
chr8	22960000	22970000
chr8	23020000	23030000
chr8	23390000	23400000
chr8	24110000	24120000
chr8	25050000	25060000
chr8	25070000	25090000
chr8	25150000	25160000
chr8	25200000	25210000
chr8	25220000	25230000
chr8	26250000	26260000
chr8	27190000	27200000
chr8	27220000	27230000
chr8	27240000	27270000
chr8	36330000	36340000
chr8	38200000	38210000
chr8	38720000	38730000
chr8	38750000	38760000
chr8	39530000	39540000
chr8	43540000	43550000
chr8	48240000	48260000
chr8	48280000	48290000
chr8	48300000	48310000
chr8	48320000	48330000
chr8	48340000	48350000
chr8	48360000	48410000
chr8	48420000	48460000
chr8	48480000	48490000
chr8	48500000	48520000
chr8	48550000	48560000
chr8	51740000	51750000
chr8	56800000	56810000
chr8	56820000	56860000
chr8	56880000	56890000
chr8	56900000	56910000
chr8	61730000	61750000
chr8	61790000	61800000
chr8	61810000	61820000
chr8	61850000	61870000
chr8	66860000	66870000
chr8	67000000	67010000
chr8	78520000	78530000
chr8	81930000	81950000
chr8	82000000	82010000
chr8	82040000	82050000
chr8	82060000	82080000
chr8	88320000	88330000
chr8	89510000	89530000
chr8	90860000	90870000
chr8	90990000	91000000
chr8	96030000	96040000
chr8	96060000	96070000
chr8	97680000	97690000
chr8	97760000	97780000
chr8	97810000	97840000
chr8	97850000	97880000
chr8	103820000	103830000
chr8	103870000	103880000
chr8	103910000	103920000
chr8	103990000	104000000
chr8	104020000	104030000
chr8	111980000	111990000
chr8	112150000	112160000
chr8	112520000	112530000
chr8	113960000	113970000
chr8	114040000	114050000
chr8	114280000	114290000
chr8	114590000	114600000
chr8	115750000	115760000
chr8	115880000	115890000
chr8	115950000	115960000
chr8	116000000	116010000
chr8	116930000	116940000
chr8	117020000	117030000
chr8	126190000	126210000
chr8	126220000	126250000
chr8	126260000	126310000
chr8	126320000	126400000
chr8	126420000	126430000
chr8	126440000	126470000
chr8	126500000	126530000
chr8	126540000	126550000
chr8	126580000	126600000
chr8	126610000	126630000
chr8	130930000	130940000
chr8	130950000	130990000
chr8	131000000	131030000
chr8	131190000	131250000
chr8	131260000	131270000
chr8	131280000	131360000
chr8	134070000	134100000
chr8	134130000	134170000
chr8	135070000	135090000
chr8	141470000	141490000
chr8	141520000	141530000
chr8	141640000	141650000
chr8	142100000	142110000
chr8	142140000	142200000
chr8	142210000	142220000
chr8	142240000	142260000
chr8	142270000	142300000
chr8	142740000	142750000
chr8	145050000	145060000
chr8	145140000	145150000
chr8	146070000	146080000
chr8	146120000	146130000
chr9	210000	230000
chr9	270000	280000
chr9	4930000	4940000
chr9	5550000	5560000
chr9	9500000	9510000
chr9	11970000	11980000
chr9	20990000	21000000
chr9	22810000	22820000
chr9	25140000	25150000
chr9	92010000	92020000
chr9	92050000	92060000
chr9	92080000	92090000
chr9	92130000	92140000
chr9	105680000	105700000
chr9	105760000	105770000
chr9	105830000	105840000
chr9	107750000	107760000
chr9	107810000	107820000
chr9	117640000	117660000
chr9	117730000	117740000
chr9	132110000	132130000
chr9	132140000	132150000
chr9	132170000	132180000
chr9	132650000	132660000
chr9	132700000	132720000
chr9	134530000	134540000
chr9	134570000	134580000
chr10	990000	1000000
chr10	1110000	1130000
chr10	1480000	1490000
chr10	3600000	3610000
chr10	3620000	3640000
chr10	3660000	3680000
chr10	3690000	3700000
chr10	3710000	3720000
chr10	3730000	3740000
chr10	3760000	3780000
chr10	3790000	3830000
chr10	3840000	3860000
chr10	3870000	3880000
chr10	3890000	3900000
chr10	3910000	3920000
chr10	4060000	4070000
chr10	4310000	4320000
chr10	4580000	4590000
chr10	4600000	4620000
chr10	4670000	4680000
chr10	4990000	5000000
chr10	5230000	5240000
chr10	6190000	6220000
chr10	6230000	6250000
chr10	6280000	6380000
chr10	6390000	6410000
chr10	6420000	6450000
chr10	8870000	8880000
chr10	8900000	8910000
chr10	8920000	8930000
chr10	10010000	10020000
chr10	12390000	12400000
chr10	14600000	14610000
chr10	14640000	14650000
chr10	14700000	14710000
chr10	17110000	17130000
chr10	17240000	17250000
chr10	19300000	19320000
chr10	19350000	19360000
chr10	19410000	19420000
chr10	19520000	19560000
chr10	19570000	19580000
chr10	19610000	19620000
chr10	19640000	19650000
chr10	19740000	19750000
chr10	20220000	20240000
chr10	20360000	20370000
chr10	26670000	26680000
chr10	26730000	26740000
chr10	26770000	26780000
chr10	29940000	29950000
chr10	30700000	30710000
chr10	30720000	30730000
chr10	30780000	30790000
chr10	30810000	30830000
chr10	30840000	30850000
chr10	31270000	31280000
chr10	31320000	31330000
chr10	31850000	31860000
chr10	37520000	37530000
chr10	37660000	37670000
chr10	37800000	37810000
chr10	38870000	38880000
chr10	43780000	43790000
chr10	43840000	43850000
chr10	53570000	53580000
chr10	53990000	54000000
chr10	56140000	56150000
chr10	56260000	56270000
chr10	56330000	56340000
chr10	57450000	57460000
chr10	58870000	58880000
chr10	59310000	59320000
chr10	60040000	60050000
chr10	60120000	60130000
chr10	60140000	60150000
chr10	63160000	63170000
chr10	63800000	63810000
chr10	64970000	64980000
chr10	64990000	65000000
chr10	66660000	66680000
chr10	67280000	67290000
chr10	68230000	68240000
chr10	70760000	70770000
chr10	70820000	70830000
chr10	70850000	70860000
chr10	73450000	73460000
chr10	73530000	73540000
chr10	73580000	73590000
chr10	73600000	73630000
chr10	74030000	74040000
chr10	75600000	75610000
chr10	75640000	75650000
chr10	75660000	75670000
chr10	75680000	75700000
chr10	75730000	75740000
chr10	81050000	81060000
chr10	81080000	81090000
chr10	83170000	83180000
chr10	83300000	83310000
chr10	89690000	89710000
chr10	89720000	89730000
chr10	89770000	89790000
chr10	89800000	89860000
chr10	89870000	89900000
chr10	89970000	89980000
chr10	90000000	90010000
chr10	90030000	90040000
chr10	90300000	90310000
chr10	90730000	90740000
chr10	91090000	91100000
chr10	91140000	91150000
chr10	98400000	98410000
chr10	98440000	98480000
chr10	99110000	99130000
chr10	100540000	100550000
chr10	101950000	101960000
chr10	106110000	106120000
chr10	110620000	110630000
chr10	112640000	112650000
chr10	117320000	117350000
chr10	134380000	134390000
chr10	134410000	134420000
chr11	300000	310000
chr11	570000	580000
chr11	690000	700000
chr11	1830000	1840000
chr11	1910000	1920000
chr11	1930000	1940000
chr11	3360000	3370000
chr11	3810000	3820000
chr11	3850000	3880000
chr11	5700000	5710000
chr11	6140000	6160000
chr11	9330000	9340000
chr11	10020000	10040000
chr11	10470000	10480000
chr11	10520000	10530000
chr11	10540000	10580000
chr11	10600000	10650000
chr11	14560000	14570000
chr11	14630000	14640000
chr11	16120000	16140000
chr11	16250000	16260000
chr11	16290000	16300000
chr11	16350000	16370000
chr11	16550000	16560000
chr11	21870000	21890000
chr11	22080000	22090000
chr11	22230000	22240000
chr11	23730000	23740000
chr11	24380000	24390000
chr11	25130000	25140000
chr11	25380000	25390000
chr11	25420000	25430000
chr11	32260000	32270000
chr11	35050000	35110000
chr11	35130000	35140000
chr11	35160000	35210000
chr11	35220000	35240000
chr11	37580000	37590000
chr11	38920000	38930000
chr11	38980000	38990000
chr11	39050000	39060000
chr11	43780000	43790000
chr11	47990000	48090000
chr11	48130000	48140000
chr11	48600000	48610000
chr11	48640000	48650000
chr11	48940000	48950000
chr11	55190000	55200000
chr11	55360000	55370000
chr11	55440000	55460000
chr11	55950000	55960000
chr11	56210000	56220000
chr11	59520000	59530000
chr11	59570000	59580000
chr11	61660000	61670000
chr11	61710000	61750000
chr11	61770000	61810000
chr11	61840000	61850000
chr11	62470000	62480000
chr11	62490000	62500000
chr11	62520000	62540000
chr11	62550000	62560000
chr11	62620000	62630000
chr11	63970000	63980000
chr11	64030000	64040000
chr11	64070000	64080000
chr11	64100000	64110000
chr11	64610000	64620000
chr11	64640000	64650000
chr11	64680000	64690000
chr11	64750000	64770000
chr11	65040000	65050000
chr11	65130000	65160000
chr11	65180000	65290000
chr11	65300000	65310000
chr11	65330000	65350000
chr11	65460000	65490000
chr11	65500000	65520000
chr11	65530000	65550000
chr11	65560000	65570000
chr11	65580000	65610000
chr11	65620000	65630000
chr11	65650000	65660000
chr11	65680000	65700000
chr11	65750000	65760000
chr11	67030000	67040000
chr11	67080000	67090000
chr11	67150000	67160000
chr11	71850000	71860000
chr11	72500000	72520000
chr11	72660000	72670000
chr11	72690000	72720000
chr11	72730000	72740000
chr11	72760000	72770000
chr11	72890000	72900000
chr11	77110000	77130000
chr11	78000000	78040000
chr11	78060000	78090000
chr11	78100000	78110000
chr11	78130000	78140000
chr11	81630000	81640000
chr11	84690000	84700000
chr11	85730000	85740000
chr11	85750000	85790000
chr11	85810000	85830000
chr11	85850000	85860000
chr11	85870000	85920000
chr11	87740000	87750000
chr11	88090000	88100000
chr11	88110000	88120000
chr11	88140000	88150000
chr11	88530000	88540000
chr11	88900000	88910000
chr11	90260000	90270000
chr11	90440000	90450000
chr11	91410000	91420000
chr11	95880000	95910000
chr11	95940000	96000000
chr11	96660000	96670000
chr11	96840000	96850000
chr11	96990000	97000000
chr11	97470000	97480000
chr11	98080000	98090000
chr11	98140000	98150000
chr11	99130000	99140000
chr11	99170000	99180000
chr11	99730000	99750000
chr11	100070000	100090000
chr11	100320000	100330000
chr11	104300000	104320000
chr11	104530000	104540000
chr11	104770000	104790000
chr11	104830000	104880000
chr11	104890000	105010000
chr11	105020000	105070000
chr11	105090000	105110000
chr11	105130000	105150000
chr11	105160000	105170000
chr11	105190000	105200000
chr11	105270000	105280000
chr11	105310000	105320000
chr11	105360000	105370000
chr11	105380000	105410000
chr11	105440000	105480000
chr11	105500000	105510000
chr11	105530000	105540000
chr11	105660000	105680000
chr11	106250000	106260000
chr11	106370000	106380000
chr11	106440000	106460000
chr11	116810000	116860000
chr11	118080000	118100000
chr11	121310000	121330000
chr11	124220000	124230000
chr11	128560000	128590000
chr11	129870000	129880000
chr11	129930000	129950000
chr11	129960000	129970000
chr11	129990000	130000000
chr12	540000	550000
chr12	710000	810000
chr12	820000	870000
chr12	880000	910000
chr12	1820000	1830000
chr12	1870000	1880000
chr12	4240000	4260000
chr12	4270000	4290000
chr12	4310000	4320000
chr12	4370000	4390000
chr12	4630000	4640000
chr12	5210000	5220000
chr12	6440000	6450000
chr12	6480000	6510000
chr12	6530000	6540000
chr12	6560000	6580000
chr12	6600000	6610000
chr12	6770000	6780000
chr12	6790000	6800000
chr12	6840000	6850000
chr12	6860000	6870000
chr12	7120000	7130000
chr12	8070000	8090000
chr12	8110000	8150000
chr12	8170000	8190000
chr12	8230000	8240000
chr12	8260000	8270000
chr12	8280000	8290000
chr12	8300000	8310000
chr12	8640000	8660000
chr12	8670000	8700000
chr12	9940000	9950000
chr12	9990000	10000000
chr12	10090000	10130000
chr12	10150000	10200000
chr12	10220000	10230000
chr12	10270000	10290000
chr12	11190000	11240000
chr12	11270000	11290000
chr12	11870000	11900000
chr12	11920000	11930000
chr12	11950000	11970000
chr12	11980000	11990000
chr12	12560000	12570000
chr12	12710000	12720000
chr12	17010000	17020000
chr12	17030000	17040000
chr12	17060000	17080000
chr12	17100000	17120000
chr12	17160000	17170000
chr12	17190000	17200000
chr12	17300000	17320000
chr12	17370000	17380000
chr12	17390000	17420000
chr12	17510000	17520000
chr12	17570000	17580000
chr12	17600000	17620000
chr12	17680000	17690000
chr12	17730000	17740000
chr12	17940000	17950000
chr12	18080000	18100000
chr12	18160000	18170000
chr12	21060000	21090000
chr12	21130000	21150000
chr12	21180000	21190000
chr12	23210000	23220000
chr12	23550000	23560000
chr12	23780000	23790000
chr12	24560000	24570000
chr12	27160000	27180000
chr12	28650000	28660000
chr12	31880000	31960000
chr12	31970000	32130000
chr12	33400000	33410000
chr12	33420000	33430000
chr12	33510000	33520000
chr12	33850000	33860000
chr12	34050000	34060000
chr12	49520000	49530000
chr12	50960000	50980000
chr12	53710000	53720000
chr12	54670000	54690000
chr12	54710000	54720000
chr12	55180000	55190000
chr12	55760000	55770000
chr12	56510000	56520000
chr12	56580000	56590000
chr12	60170000	60180000
chr12	60750000	60760000
chr12	60810000	60820000
chr12	60860000	60870000
chr12	61030000	61040000
chr12	61270000	61280000
chr12	61430000	61460000
chr12	61470000	61480000
chr12	61560000	61580000
chr12	61610000	61620000
chr12	62180000	62190000
chr12	62650000	62660000
chr12	62700000	62710000
chr12	64990000	65040000
chr12	65070000	65120000
chr12	65140000	65150000
chr12	66530000	66560000
chr12	66600000	66610000
chr12	66630000	66640000
chr12	66660000	66670000
chr12	72880000	72900000
chr12	73520000	73530000
chr12	73950000	73960000
chr12	75350000	75360000
chr12	78470000	78480000
chr12	79050000	79060000
chr12	80920000	80930000
chr12	82440000	82450000
chr12	83930000	83940000
chr12	84490000	84500000
chr12	84610000	84640000
chr12	86960000	86970000
chr12	87210000	87220000
chr12	87520000	87540000
chr12	87720000	87730000
chr12	88140000	88160000
chr12	89100000	89110000
chr12	89540000	89560000
chr12	89570000	89620000
chr12	89630000	89670000
chr12	89680000	89700000
chr12	89740000	89750000
chr12	90100000	90110000
chr12	90120000	90160000
chr12	90170000	90200000
chr12	90210000	90260000
chr12	90830000	90840000
chr12	90930000	90940000
chr12	90950000	90970000
chr12	91030000	91040000
chr12	91130000	91140000
chr12	92110000	92120000
chr12	92510000	92520000
chr12	92760000	92770000
chr12	94520000	94530000
chr12	94540000	94550000
chr12	104910000	104920000
chr12	104940000	104950000
chr12	104960000	104970000
chr12	104990000	105010000
chr12	105030000	105050000
chr12	105060000	105090000
chr12	105140000	105160000
chr12	109050000	109060000
chr12	109070000	109090000
chr12	109100000	109140000
chr12	110900000	110910000
chr12	110930000	110940000
chr12	111010000	111020000
chr12	111030000	111040000
chr12	121830000	121840000
chr12	122120000	122130000
chr12	122230000	122240000
chr12	122320000	122330000
chr12	122520000	122530000
chr12	123130000	123140000
chr12	123200000	123240000
chr12	123430000	123440000
chr13	31250000	31260000
chr13	31280000	31300000
chr13	31310000	31320000
chr13	46750000	46760000
chr13	46860000	46870000
chr13	46890000	46900000
chr13	46910000	46920000
chr13	57740000	57750000
chr13	77350000	77360000
chr13	83970000	83980000
chr13	96330000	96340000
chr13	111200000	111210000
chr13	114740000	114750000
chr13	114900000	114910000
chr14	21160000	21170000
chr14	23450000	23460000
chr14	24610000	24620000
chr14	24660000	24690000
chr14	24700000	24720000
chr14	24760000	24770000
chr14	27670000	27680000
chr14	27720000	27730000
chr14	28180000	28200000
chr14	28410000	28420000
chr14	29090000	29100000
chr14	32260000	32270000
chr14	35320000	35330000
chr14	35750000	35770000
chr14	35840000	35850000
chr14	35860000	35870000
chr14	38520000	38530000
chr14	38550000	38560000
chr14	38610000	38620000
chr14	41020000	41030000
chr14	41260000	41270000
chr14	42380000	42390000
chr14	43770000	43780000
chr14	44580000	44590000
chr14	46600000	46610000
chr14	46630000	46640000
chr14	46670000	46680000
chr14	46730000	46740000
chr14	47200000	47210000
chr14	47230000	47240000
chr14	48920000	48930000
chr14	51240000	51250000
chr14	51400000	51410000
chr14	52310000	52320000
chr14	52330000	52360000
chr14	61940000	62150000
chr14	62160000	62200000
chr14	68950000	68960000
chr14	68980000	68990000
chr14	69040000	69050000
chr14	69060000	69070000
chr14	69080000	69090000
chr14	69110000	69120000
chr14	69140000	69210000
chr14	69220000	69230000
chr14	70080000	70120000
chr14	70150000	70170000
chr14	71860000	71870000
chr14	71950000	71960000
chr14	75610000	75620000
chr14	75640000	75660000
chr14	75700000	75710000
chr14	75720000	75730000
chr14	75740000	75770000
chr14	75800000	75810000
chr14	84840000	84850000
chr14	85390000	85400000
chr14	92950000	92960000
chr14	98110000	98120000
chr14	102270000	102280000
chr14	106160000	106170000
chr15	26860000	26870000
chr15	29200000	29220000
chr15	36420000	36430000
chr15	37910000	37920000
chr15	39660000	39670000
chr15	39700000	39720000
chr15	44950000	44960000
chr15	46950000	46960000
chr15	47260000	47270000
chr15	50070000	50080000
chr15	50260000	50270000
chr15	50370000	50380000
chr15	55510000	55520000
chr15	55540000	55550000
chr15	55570000	55590000
chr15	58780000	58790000
chr15	63540000	63550000
chr15	63770000	63780000
chr15	63800000	63810000
chr15	65170000	65200000
chr15	70010000	70020000
chr15	70050000	70060000
chr15	70070000	70080000
chr15	70090000	70100000
chr15	70140000	70160000
chr15	70170000	70190000
chr15	70200000	70220000
chr15	70250000	70260000
chr15	75330000	75340000
chr15	75350000	75380000
chr15	75390000	75410000
chr15	75420000	75430000
chr15	75490000	75500000
chr15	80190000	80210000
chr15	80250000	80290000
chr15	87720000	87730000
chr15	90380000	90400000
chr15	90410000	90440000
chr15	90500000	90520000
chr15	90540000	90590000
chr15	90600000	90610000
chr15	91310000	91320000
chr15	91410000	91420000
chr15	93340000	93350000
chr15	93420000	93430000
chr15	93440000	93450000
chr15	94740000	94760000
chr15	94770000	94780000
chr15	94830000	94840000
chr15	99440000	99450000
chr15	101660000	101670000
chr15	101700000	101720000
chr15	101740000	101770000
chr16	150000	160000
chr16	760000	770000
chr16	2950000	2960000
chr16	3050000	3060000
chr16	3100000	3140000
chr16	3170000	3180000
chr16	3200000	3250000
chr16	3260000	3270000
chr16	3280000	3320000
chr16	3330000	3340000
chr16	3350000	3360000
chr16	3430000	3460000
chr16	4140000	4150000
chr16	4690000	4700000
chr16	5790000	5800000
chr16	6800000	6810000
chr16	9190000	9210000
chr16	10050000	10060000
chr16	11620000	11780000
chr16	11790000	11810000
chr16	20880000	20900000
chr16	20920000	20930000
chr16	21630000	21640000
chr16	21650000	21670000
chr16	23070000	23080000
chr16	23840000	23850000
chr16	23870000	23880000
chr16	23890000	23900000
chr16	27270000	27280000
chr16	27310000	27320000
chr16	27330000	27340000
chr16	28150000	28160000
chr16	28170000	28180000
chr16	28190000	28200000
chr16	29740000	29750000
chr16	29870000	29880000
chr16	30540000	30550000
chr16	30620000	30630000
chr16	30850000	30860000
chr16	31080000	31090000
chr16	31120000	31130000
chr16	31140000	31160000
chr16	31190000	31200000
chr16	31210000	31220000
chr16	31250000	31290000
chr16	31340000	31350000
chr16	31920000	31930000
chr16	33880000	33920000
chr16	34350000	34360000
chr16	34420000	34430000
chr16	34600000	34610000
chr16	34660000	34670000
chr16	35100000	35110000
chr16	46840000	46850000
chr16	48420000	48430000
chr16	48460000	48490000
chr16	48590000	48610000
chr16	48630000	48660000
chr16	50770000	50790000
chr16	52280000	52290000
chr16	52450000	52480000
chr16	53240000	53250000
chr16	53410000	53420000
chr16	53500000	53520000
chr16	55860000	55870000
chr16	57100000	57110000
chr16	59020000	59030000
chr16	59100000	59110000
chr16	59340000	59350000
chr16	59440000	59450000
chr16	59510000	59520000
chr16	59600000	59610000
chr16	59940000	59950000
chr16	60010000	60030000
chr16	60510000	60520000
chr16	60930000	60940000
chr16	61180000	61190000
chr16	61320000	61330000
chr16	61350000	61370000
chr16	61420000	61430000
chr16	61680000	61690000
chr16	61770000	61780000
chr16	62070000	62080000
chr16	62470000	62480000
chr16	62730000	62740000
chr16	62780000	62790000
chr16	62920000	62930000
chr16	63380000	63390000
chr16	63680000	63690000
chr16	63710000	63730000
chr16	63810000	63820000
chr16	63890000	63900000
chr16	64020000	64030000
chr16	64050000	64060000
chr16	64360000	64370000
chr16	64620000	64630000
chr16	64650000	64660000
chr16	66130000	66140000
chr16	66180000	66190000
chr16	66210000	66220000
chr16	66580000	66600000
chr16	67880000	67890000
chr16	67920000	67930000
chr16	67960000	67970000
chr16	68070000	68080000
chr16	76250000	76260000
chr16	76430000	76440000
chr16	76570000	76580000
chr16	76690000	76700000
chr16	81570000	81580000
chr16	81810000	81840000
chr16	81850000	81870000
chr16	83990000	84010000
chr16	84620000	84630000
chr16	84640000	84660000
chr16	84710000	84740000
chr16	84760000	84770000
chr16	84780000	84790000
chr16	84840000	84850000
chr16	84940000	84950000
chr16	89070000	89080000
chr16	89090000	89100000
chr16	89370000	89440000
chr16	89470000	89480000
chr16	89490000	89510000
chr16	89530000	89560000
chr17	400000	410000
chr17	420000	450000
chr17	460000	480000
chr17	500000	510000
chr17	550000	560000
chr17	1270000	1290000
chr17	1300000	1310000
chr17	1340000	1370000
chr17	1410000	1440000
chr17	1450000	1500000
chr17	1510000	1550000
chr17	1570000	1580000
chr17	3060000	3070000
chr17	3090000	3110000
chr17	3120000	3130000
chr17	3270000	3280000
chr17	4130000	4140000
chr17	4210000	4230000
chr17	4610000	4640000
chr17	4680000	4700000
chr17	4750000	4760000
chr17	4800000	4810000
chr17	4850000	4870000
chr17	6230000	6240000
chr17	7380000	7390000
chr17	7420000	7430000
chr17	7480000	7490000
chr17	7760000	7770000
chr17	7810000	7820000
chr17	7880000	7900000
chr17	8070000	8080000
chr17	8460000	8470000
chr17	8810000	8860000
chr17	9910000	9940000
chr17	9960000	9980000
chr17	10010000	10060000
chr17	10360000	10370000
chr17	10410000	10420000
chr17	10450000	10460000
chr17	10880000	10910000
chr17	11230000	11240000
chr17	11610000	11620000
chr17	11630000	11650000
chr17	11710000	11720000
chr17	12230000	12240000
chr17	12380000	12390000
chr17	12410000	12420000
chr17	12470000	12480000
chr17	12500000	12510000
chr17	12590000	12600000
chr17	13520000	13530000
chr17	13550000	13580000
chr17	13680000	13690000
chr17	13850000	13860000
chr17	14040000	14050000
chr17	14110000	14120000
chr17	14320000	14340000
chr17	14380000	14390000
chr17	14450000	14460000
chr17	14500000	14540000
chr17	14630000	14650000
chr17	14780000	14800000
chr17	14860000	14870000
chr17	15040000	15050000
chr17	15180000	15190000
chr17	15260000	15270000
chr17	16040000	16050000
chr17	16390000	16400000
chr17	17760000	17770000
chr17	19360000	19370000
chr17	20080000	20090000
chr17	20150000	20170000
chr17	21030000	21060000
chr17	21110000	21120000
chr17	21790000	21800000
chr17	21960000	21970000
chr17	22070000	22120000
chr17	25560000	25570000
chr17	25620000	25640000
chr17	25650000	25670000
chr17	25790000	25800000
chr17	25960000	25970000
chr17	28670000	28680000
chr17	28690000	28700000
chr17	28710000	28730000
chr17	28740000	28750000
chr17	29540000	29550000
chr17	29670000	29680000
chr17	31140000	31150000
chr17	31170000	31190000
chr17	31780000	31790000
chr17	32520000	32530000
chr17	32830000	32840000
chr17	33410000	33420000
chr17	33630000	33640000
chr17	33670000	33680000
chr17	33700000	33710000
chr17	33750000	33780000
chr17	33860000	33870000
chr17	34410000	34420000
chr17	34430000	34440000
chr17	35140000	35160000
chr17	38250000	38260000
chr17	38310000	38330000
chr17	39230000	39240000
chr17	39250000	39260000
chr17	39270000	39280000
chr17	39340000	39350000
chr17	40400000	40430000
chr17	40440000	40530000
chr17	40540000	40560000
chr17	40600000	40620000
chr17	41380000	41410000
chr17	42260000	42270000
chr17	43290000	43300000
chr17	43370000	43400000
chr17	48370000	48380000
chr17	49070000	49090000
chr17	49130000	49150000
chr17	49640000	49650000
chr17	50010000	50020000
chr17	50110000	50120000
chr17	50250000	50270000
chr17	50390000	50400000
chr17	50460000	50490000
chr17	50580000	50590000
chr17	50600000	50640000
chr17	50710000	50720000
chr17	50800000	50810000
chr17	50830000	50860000
chr17	50870000	50880000
chr17	50890000	50900000
chr17	51000000	51010000
chr17	51070000	51090000
chr17	51150000	51160000
chr17	51170000	51190000
chr17	51200000	51230000
chr17	51240000	51270000
chr17	51300000	51310000
chr17	51360000	51380000
chr17	51410000	51430000
chr17	51450000	51460000
chr17	51470000	51480000
chr17	51520000	51550000
chr17	51560000	51590000
chr17	51620000	51640000
chr17	51660000	51680000
chr17	51710000	51730000
chr17	51800000	51810000
chr17	51900000	51910000
chr17	51950000	51990000
chr17	52010000	52020000
chr17	52070000	52080000
chr17	52110000	52120000
chr17	52160000	52200000
chr17	52260000	52270000
chr17	52390000	52420000
chr17	52470000	52480000
chr17	52490000	52500000
chr17	52520000	52560000
chr17	52600000	52610000
chr17	52630000	52650000
chr17	52700000	52720000
chr17	52790000	52800000
chr17	53210000	53220000
chr17	53420000	53430000
chr17	53700000	53710000
chr17	53800000	53810000
chr17	54000000	54010000
chr17	54100000	54120000
chr17	54250000	54260000
chr17	55970000	55980000
chr17	56860000	56870000
chr17	57800000	57840000
chr17	57860000	57890000
chr17	57900000	57920000
chr17	58310000	58320000
chr17	58360000	58380000
chr17	58400000	58430000
[truncated: 895 more rows]
