# Supplementary material for: Profiling of 3D Genome Organization in Nasopharyngeal Cancer Needle Biopsy Patient Samples by a Modified Hi-C Approach
Source: Front Genet. 2021 Sep 3;12:673530. doi: 10.3389/fgene.2021.673530 (PMC8446523; doi:10.3389/fgene.2021.673530)
Supplement: Supplementary file 15 [file Table_14.XLSX]

## Sheet: Lost_SE
chr1	gene_anchor_position	centroid1	centroid2	fdrBL	fdrDonut	genes	enhancers	number_genes	number_enhancers
22	right	19958333	20011666	2.58783e-23	3.07562e-23	ARVCF;TANGO2;MIR185	HK1_SE:680	3	1
22	right	19972500	20060000	5.96206e-07	4.93114e-05	AC006547.13;AC006547.15;DGCR8;MIR3618;MIR1306	HK1_SE:680	5	1
22	left	21132500	21312500	0.000220834	8.4562e-06	SERPIND1	HK1_SE:682	1	1
22	left	21255000	21310000	3.66405e-11	3.49722e-11	AC007308.7	HK1_SE:682	1	1
22	right	21310000	21368750	0.000251627	0.000273007	THAP7;THAP7-AS1;TUBA3FP;AC002472.1;P2RX6	HK1_SE:682	5	1
22	left	22078333	38551666	8.97843e-22	6.12544e-08	YPEL1;RN7SL280P	HK1_SE:688	2	1
22	right	24605000	24865000	2.65944e-06	9.38899e-05	UPB1	HK1_SE:683	1	1
22	right	32066250	32346250	7.5347e-06	7.73116e-05	C22orf24;YWHAH;snoU13;CTA-342B11.1	HK1_SE:686	4	1
22	right	38537500	38637500	0.00190502	0.0286881	RP1-5O6.5;RN7SL704P	HK1_SE:688	2	1
22	right	38630000	38667500	7.68564e-05	0.00442819	TMEM184B;AL020993.1	HK1_SE:689	2	1
22	left	38667500	41602500	8.6409e-06	0.000230206	TMEM184B;AL020993.1	HK1_SE:690	2	1
22	right	41787500	42237500	2.70439e-06	0.00117732	RP5-821D11.7;SREBF2	HK1_SE:691	2	1
22	left	43017500	43067500	7.27511e-07	6.87811e-07	POLDIP3;RNU12	HK1_SE:693	2	1
22	left	43035500	43141500	1.84796e-05	2.00465e-05	CYB5R3;ATP5L2	HK1_SE:694	2	1
22	right	43092500	43145000	1.53372e-06	1.46297e-06	Y_RNA	HK1_SE:693	1	1
22	right	43335000	43412500	0.000966918	0.000973973	PACSIN2	HK1_SE:695	1	1
22	left	44707500	44757500	4.3111e-08	4.70336e-08	KIAA1644	HK1_SE:697	1	1
22	right	44707500	44757500	4.3111e-08	4.70336e-08	RP1-32I10.10	HK1_SE:697	1	1
22	right	44732500	44842500	4.37449e-06	4.71409e-06	CTA-397C4.2	HK1_SE:697	1	1
22	left	44757500	45147500	0.000148601	0.000141293	RP1-32I10.10	HK1_SE:698	1	1
22	left	45089264	45141617	5.25564e-12	2.97357e-16	PRR5-ARHGAP8;ARHGAP8	HK1_SE:698	2	1
22	left	46075000	46335000	4.69496e-10	0.000137358	ATXN10	HK1_SE:703	1	1
22	right	46172500	46372500	6.37632e-10	5.83238e-10	WNT7B;CR536603.1	HK1_SE:702	2	1
22	left	46404166	46473333	2.73867e-17	2.84242e-17	CITF22-92A6.1	HK1_SE:704	1	1
22	left	46475000	46855000	0.000981937	0.00106783	RP6-109B7.4;MIR3619	HK1_SE:705	2	1
22	right	46912500	46972500	0.000571434	0.000572385	GRAMD4	HK1_SE:706	1	1
2	left	1630833	1729166	6.37632e-10	6.46816e-08	AC144450.1;AC144450.2	HK1_SE:60	2	1
2	left	9282500	9462500	0.000571434	0.000572385	RP11-734K21.4	HK1_SE:62	1	1
2	right	9942500	10092500	0.000106518	1.75779e-06	GRHL1	HK1_SE:63	1	1
2	left	10262500	10437500	8.6409e-06	8.4562e-06	RP11-254F7.4;RRM2	HK1_SE:64	2	1
2	left	20310000	20345000	0.000805646	0.000868542	AC098828.2	HK1_SE:65	1	1
2	left	20432500	20777500	2.36306e-07	1.66382e-06	SDC1;AC007041.2;RNU7-113P	HK1_SE:66	3	1
2	left	20560000	20780000	0.000624381	0.000579839	PUM2;AC007041.1	HK1_SE:66	2	1
2	left	20715000	20770000	1.18955e-08	0.000122103	AC012065.4	HK1_SE:66	1	1
2	left	20714166	20780000	2.10534e-07	2.20414e-05	AC012065.4	HK1_SE:66	1	1
2	left	28619642	28673928	3.98199e-05	3.71444e-05	AC104695.3;FOSL2;RP11-373D23.2	HK1_SE:67	3	1
2	right	28797500	29117500	6.88926e-08	6.46816e-08	WDR43	HK1_SE:68	1	1
2	right	28814166	28974166	3.91063e-24	1.00932e-19	PPP1CB	HK1_SE:68	1	1
2	left	30362500	31612500	4.95544e-06	9.32953e-06	AC016907.3;YPEL5	HK1_SE:69	2	1
2	left	36590000	36792500	8.6409e-06	0.000230206	RP11-490M8.1;CRIM1	HK1_SE:71	2	1
2	right	36590000	36792500	8.6409e-06	0.000230206	AC007401.2	HK1_SE:70	1	1
2	right	36582500	36887500	2.10182e-05	0.0036095	FEZ2;RP11-294L11.1	HK1_SE:70	2	1
2	left	36589500	36631500	2.02113e-12	2.1444e-12	RP11-490M8.1;CRIM1	HK1_SE:70	2	1
2	right	37770000	37815000	0.0115426	0.0118064	AC006369.2	HK1_SE:72	1	1
2	left	37815000	38005000	1.5523e-17	4.26085e-08	AC006369.2	HK1_SE:73	1	1
2	left	45877500	45912500	1.86186e-07	1.7684e-07	PRKCE	HK1_SE:77	1	1
2	right	47262500	47300000	3.57316e-11	3.94221e-11	AC073283.7	HK1_SE:80	1	1
2	left	54755000	54793750	1.29908e-07	1.23952e-07	AC092839.3;AC092839.1	HK1_SE:81	2	1
2	left	61110000	61187500	6.92731e-05	0.00191662	AC010733.4;REL	HK1_SE:83	2	1
2	right	61184500	61239500	6.32328e-07	6.60691e-07	PUS10;RNA5SP95;PEX13	HK1_SE:83	3	1
2	left	64752500	64977500	2.95586e-11	1.04531e-13	RP11-568N6.1;AFTPH	HK1_SE:84	2	1
2	left	64818500	65107500	1.27441e-09	1.25564e-09	RNU6-100P	HK1_SE:86	1	1
2	left	64872500	65095000	2.48316e-08	9.55702e-11	AC007365.3	HK1_SE:86	1	1
2	left	64876500	65083500	4.0025e-22	8.02634e-13	AC007365.3	HK1_SE:86	1	1
2	left	65030000	65067500	0.000133762	0.0116939	RN7SL341P	HK1_SE:86	1	1
2	right	65030000	65067500	0.000133762	0.0116939	Y_RNA	HK1_SE:85	1	1
2	right	65604500	65790500	4.95717e-09	4.66247e-09	Vault	HK1_SE:88	1	1
2	left	70567500	70617500	0.0014682	0.00154525	BRD7P6	HK1_SE:91	1	1
2	right	70567500	70617500	0.0014682	0.00154525	AC022201.4	HK1_SE:91	1	1
2	right	70566250	70781250	3.49089e-08	3.69574e-08	TGFA	HK1_SE:91	1	1
2	right	70566500	70673500	4.39435e-09	6.43495e-07	AC017084.1	HK1_SE:91	1	1
2	left	71686875	71734375	6.32328e-07	6.60691e-07	DYSF	HK1_SE:92	1	1
2	left	74161666	74210000	4.83439e-17	5.17322e-17	DGUOK	HK1_SE:93	1	1
2	left	74152500	74237500	0.000477668	0.000480229	DGUOK	HK1_SE:93	1	1
2	right	85137500	86662500	6.92408e-05	0.000174485	KDM3A	HK1_SE:95	1	1
2	right	85146250	85193750	1.7022e-17	1.39245e-17	KCMF1	HK1_SE:95	1	1
2	left	85492500	85527500	1.14535e-05	1.22662e-05	AC093162.3	HK1_SE:96	1	1
2	right	85492500	85527500	1.14535e-05	1.22662e-05	AC093162.1;AC093162.5	HK1_SE:96	2	1
2	left	113342500	113382500	0.000305398	0.000294535	Y_RNA;CHCHD5;AC012442.5;AC012442.6	HK1_SE:101	4	1
2	left	113402500	113637500	3.36462e-07	0.000214472	AC079922.3;SLC20A1	HK1_SE:104	2	1
2	right	113515000	113695000	0.000471635	0.000502906	AC079753.5	HK1_SE:102	1	1
2	left	113531136	113586136	2.0493e-11	2.14714e-11	CKAP2L;IL1A	HK1_SE:103	2	1
2	right	113531136	113586136	2.0493e-11	2.14714e-11	IL1B	HK1_SE:102	1	1
2	right	113562500	113837500	5.19489e-06	4.91854e-06	IL1F10;RNU6-1180P	HK1_SE:103	2	1
2	left	113596071	113638928	2.35446e-18	1.02286e-13	IL1B;AC079753.1;AC079753.4	HK1_SE:104	3	1
2	right	113642500	113700000	0.0035246	0.00376037	AC079753.5	HK1_SE:104	1	1
2	right	159745000	160145000	5.30409e-05	8.73196e-07	WDSUB1	HK1_SE:108	1	1
2	right	159747500	159827500	0.000366955	1.26465e-05	TANC1	HK1_SE:108	1	1
2	right	161072500	161265000	0.000131781	0.000119277	RMRPP3;MIR4785	HK1_SE:109	2	1
2	right	161290000	161347500	0.000220834	0.000230206	RBMS1	HK1_SE:110	1	1
2	left	172965000	173115000	9.8765e-07	9.29169e-07	DLX2;AC104801.1	HK1_SE:113	2	1
2	left	173915000	174015000	0.000113379	0.000127187	AC019046.1	HK1_SE:115	1	1
2	left	177000000	178012500	7.47717e-15	1.48325e-14	HOXD-AS2;HOXD9;HOXD8;HOXD3	HK1_SE:116	4	1
2	left	177525000	178012500	0.0123461	4.82846e-08	RNU6ATAC14P	HK1_SE:116	1	1
2	left	177687500	178012500	2.70474e-05	2.11475e-09	AC092162.1;AC092162.2	HK1_SE:116	2	1
2	right	178035000	178262500	2.98768e-10	1.42721e-08	NFE2L2;AC074286.1;AGPS	HK1_SE:116	3	1
2	left	178128653	178188653	5.00654e-28	4.8667e-28	MIR3128;AC079305.10	HK1_SE:117	2	1
2	right	178212500	178487500	5.11506e-06	4.93242e-06	TTC30A	HK1_SE:117	1	1
2	right	178205000	178255000	9.54163e-09	1.02224e-08	NFE2L2;AC074286.1;AGPS	HK1_SE:117	3	1
2	right	192033750	192246250	2.27836e-13	1.93217e-13	RNU6-1045P	HK1_SE:118	1	1
2	right	192034166	192114166	6.4405e-12	2.47005e-15	AC092614.2;MYO1B	HK1_SE:118	2	1
2	right	201622500	201669166	1.86106e-08	2.04572e-08	AC007163.6;BZW1	HK1_SE:120	2	1
2	left	208111071	208198214	6.26783e-13	1.51752e-16	AC007879.2;AC007879.3;AC007879.7;AC007879.6	HK1_SE:123	4	1
2	right	208197500	208577500	1.00434e-07	5.09462e-07	CCNYL1	HK1_SE:123	1	1
2	right	219137500	219440000	2.06874e-05	1.89137e-05	USP37;RQCD1;RNU6-136P	HK1_SE:124	3	1
2	right	219162500	219537500	0.000189186	0.000206577	ZNF142;BCS1L;RNF25;STK36	HK1_SE:124	4	1
2	left	221055000	221092500	0.000154959	1.64114e-06	AC114765.3	HK1_SE:126	1	1
2	right	224662500	224815000	2.43743e-07	2.31256e-07	WDFY1;MRPL44	HK1_SE:127	2	1
2	left	232379166	232470833	3.64649e-14	1.04788e-17	RNU2-22P;LINC00471	HK1_SE:129	2	1
2	right	235155000	235335000	0.00278761	0.00300023	AC097713.3	HK1_SE:131	1	1
2	right	238774166	238877500	6.88926e-08	6.46816e-08	UBE2F;UBE2F-SCLY	HK1_SE:134	2	1
2	right	238775000	238967500	7.20906e-10	2.60856e-06	SCLY	HK1_SE:134	1	1
15	left	29962500	30225500	2.62081e-20	5.34032e-17	RP11-680F8.1	HK1_SE:536	1	1
15	left	30105000	30215000	1.70191e-32	2.0141e-23	RP11-680F8.3	HK1_SE:536	1	1
15	left	32951666	33428333	5.13023e-09	6.42337e-07	RP11-1000B6.2	HK1_SE:537	1	1
15	right	39465000	39730000	0.0516811	0.00248955	RP11-624L4.1	HK1_SE:538	1	1
15	right	39466250	39873750	0	0	THBS1;CTD-2033D15.1	HK1_SE:538	2	1
15	right	42062500	42195000	4.11602e-07	0.000137358	SPTBN5;RP11-23P13.6;RP11-23P13.7	HK1_SE:539	3	1
15	right	56290000	56535000	7.24025e-07	6.42337e-07	RFX7;TEX9	HK1_SE:540	2	1
15	left	56291500	56339500	2.67372e-12	8.73999e-09	NEDD4;CNOT6LP1	HK1_SE:540	2	1
15	left	59562500	59597500	2.86262e-05	0.000973973	RP11-429D19.1	HK1_SE:542	1	1
15	right	67335000	67445000	7.40479e-05	8.06912e-05	RP11-342M21.2	HK1_SE:543	1	1
15	right	67350000	67547500	0.000571434	0.000572385	AAGAB;IQCH	HK1_SE:543	2	1
15	right	74667500	74837500	8.2875e-07	1.1321e-08	ARID3B	HK1_SE:544	1	1
15	right	74667500	75062500	1.48317e-06	1.51788e-05	CSK	HK1_SE:544	1	1
15	left	75932500	75972500	0.00190502	7.43645e-05	SNUPN;CTD-2026K11.2;IMP3;SNX33	HK1_SE:545	4	1
15	right	75985000	76035000	0.000353174	0.000327748	DNM1P35;RP11-24M17.4;AC019294.1;RP11-24M17.3	HK1_SE:545	4	1
15	right	75987500	76092500	2.06874e-05	1.89137e-05	DNM1P49	HK1_SE:545	1	1
15	right	80871071	81071785	2.35943e-18	2.63062e-22	KIAA1199	HK1_SE:547	1	1
15	right	80885000	81295000	0.000284503	0.00497169	MESDC2;RP11-775C24.3;MIR4514;MESDC1;C15orf26	HK1_SE:547	5	1
15	left	90757500	90957500	6.01395e-05	0.00220262	RPS12P26	HK1_SE:549	1	1
15	left	90885000	90950000	4.00414e-06	0.00168513	GABARAPL3;ZNF774	HK1_SE:549	2	1
15	left	93337500	94787500	0.000777531	0.00130205	CTD-2313J17.5;ASB9P1;CTD-2313J17.1	HK1_SE:551	3	1
15	right	93337500	94787500	0.000777531	0.00130205	MCTP2	HK1_SE:550	1	1
15	right	93353214	93445833	5.53012e-14	8.36716e-18	MIR3175	HK1_SE:550	1	1
15	left	94720000	94780000	7.40721e-08	7.92352e-08	RP11-452K20.1	HK1_SE:551	1	1
15	left	99319166	99400833	0.00172072	0.00183873	MIR4714	HK1_SE:552	1	1
15	right	99404166	99445833	3.10549e-07	5.94204e-10	RP11-654A16.1	HK1_SE:552	1	1
21	left	36117500	36167500	0.000543794	0.000569427	LINC00160;AP000330.8	HK1_SE:670	2	1
21	left	36522500	36562500	0.000106518	0.000107722	AF015262.2	HK1_SE:672	1	1
21	left	38725000	39625000	0.000787061	0.0248333	AP001437.1;DYRK1A	HK1_SE:673	2	1
21	right	39625000	40162500	4.60741e-09	6.03315e-09	ETS2	HK1_SE:673	1	1
21	left	39625000	40287500	0.0229779	0.0328269	AP001434.2;SPATA20P1	HK1_SE:675	2	1
21	right	39625000	40287500	0.0229779	0.0328269	AP001044.2	HK1_SE:673	1	1
21	left	40119500	40175500	3.79764e-06	3.58794e-06	LINC00114	HK1_SE:674	1	1
21	right	40185000	40385000	0.0516811	0.055079	AF064858.8;AF064858.11	HK1_SE:674	2	1
21	left	40181071	40281785	1.91039e-10	1.48568e-13	ETS2	HK1_SE:675	1	1
21	right	40181071	40281785	1.91039e-10	1.48568e-13	RPSAP64;AP001044.2	HK1_SE:674	2	1
21	right	40212500	41012500	8.20429e-07	2.49824e-06	AF064860.5	HK1_SE:674	1	1
21	left	40220000	40277500	1.56707e-06	1.64114e-06	AP001042.1	HK1_SE:675	1	1
21	right	40220000	40277500	1.56707e-06	1.64114e-06	SNORA62;RPSAP64;AP001044.2	HK1_SE:674	3	1
21	right	40280833	40374166	2.43743e-07	1.26465e-05	AF064858.8;AF064858.11	HK1_SE:675	2	1
21	right	40285000	40505000	0.00355792	5.26111e-05	RPL23AP12	HK1_SE:675	1	1
21	left	44862500	44910833	2.86262e-05	0.000973973	LINC00319	HK1_SE:678	1	1
12	left	3187500	3407500	2.69181e-06	4.6024e-08	RP11-253E3.1;TSPAN9	HK1_SE:428	2	1
12	left	3327500	3567500	1.00434e-07	1.51788e-05	RP11-543P15.1	HK1_SE:429	1	1
12	right	3565000	4145000	2.64376e-06	6.52366e-05	RP11-320N7.2	HK1_SE:429	1	1
12	right	6179166	6390277	5.449e-26	5.53458e-26	RP1-96H9.5	HK1_SE:431	1	1
12	right	6285000	6330000	0.000762128	7.35531e-07	Y_RNA	HK1_SE:432	1	1
12	right	6328750	6483750	1.71532e-08	2.58117e-05	SCNN1A;LTBR	HK1_SE:433	2	1
12	right	6447500	6642500	4.03298e-12	1.25564e-09	RP5-940J5.3;GAPDH;RP5-940J5.9;RP5-940J5.8	HK1_SE:435	4	1
12	right	10517500	10872500	9.87889e-06	9.15597e-06	YBX3	HK1_SE:436	1	1
12	left	12877500	12971250	3.62771e-05	1.23952e-07	CDKN1B;RP11-180M15.4;APOLD1	HK1_SE:438	3	1
12	right	12978706	13044913	0	0	GPRC5A	HK1_SE:438	1	1
12	left	13055000	13360000	0.000131781	0.000119277	GPRC5A;MIR614	HK1_SE:439	2	1
12	left	13152500	13365833	9.65256e-14	8.28815e-11	HEBP1;HTR7P1;RP11-377D9.3	HK1_SE:439	3	1
12	left	13252500	13360357	0	0	GSG1	HK1_SE:439	1	1
12	right	14412500	14472500	0.000228491	0.000230896	RN7SL676P	HK1_SE:440	1	1
12	left	27095000	27685000	0.0064251	0.000119277	ASUN;FGFR1OP2	HK1_SE:441	2	1
12	left	27742500	27787500	0.0014682	1.71738e-05	RP11-709A23.2	HK1_SE:441	1	1
12	left	28117500	28285000	9.20386e-13	8.91333e-13	PTHLH;RP11-993B23.3	HK1_SE:443	2	1
12	left	28127500	28187500	2.29041e-30	2.213e-42	PTHLH	HK1_SE:442	1	1
12	right	28287500	28332500	0.0568906	0.057343	RP11-967K21.1;RP11-967K21.2	HK1_SE:443	2	1
12	left	31477500	31902500	0.00164913	0.00157116	FAM60A;RP11-627K11.3;AC024940.1	HK1_SE:445	3	1
12	right	31885000	32115000	1.5711e-07	0.000106588	RP11-428G5.2;RP11-428G5.7;KIAA1551	HK1_SE:445	3	1
12	left	31882500	31917500	3.74169e-05	3.6184e-05	AMN1	HK1_SE:445	1	1
12	right	31882500	31917500	3.74169e-05	3.6184e-05	RP11-467L13.5	HK1_SE:445	1	1
12	right	31887500	31972500	0.000366955	0.0067623	SNORA25	HK1_SE:445	1	1
12	right	31895833	33054166	4.2973e-05	0.00279465	PKP2	HK1_SE:445	1	1
12	left	46774500	46947500	1.99973e-07	2.97162e-09	SLC38A2;RP11-474P2.2;RP11-96H19.1;RP11-474P2.4	HK1_SE:447	4	1
12	right	46950000	47485000	0.00114135	0.000217744	AMIGO2;PCED1B	HK1_SE:447	2	1
12	left	47483928	47668214	3.14675e-10	3.01651e-10	AMIGO2;PCED1B	HK1_SE:448	2	1
12	right	52535000	52977500	0.0189439	0.00186511	KRT74	HK1_SE:450	1	1
12	right	52544500	53266500	7.47717e-15	2.63545e-11	RPL7P41	HK1_SE:450	1	1
12	right	52545000	52917500	6.80226e-13	4.66956e-13	KRT5;AC055736.1	HK1_SE:450	2	1
12	right	52550833	52724166	1.71532e-08	2.41418e-10	KRT83	HK1_SE:450	1	1
12	right	52552500	52608214	8.49396e-10	1.59658e-12	C12orf80;LINC00592	HK1_SE:450	2	1
12	left	64235000	64575000	1.31462e-14	3.86865e-11	AC084357.1;SRGAP1	HK1_SE:452	2	1
12	left	65995000	66032500	1.25256e-09	1.19008e-09	RP11-221N13.3	HK1_SE:454	1	1
12	right	65995000	66032500	1.25256e-09	1.19008e-09	RP11-230G5.2;RP11-221N13.4;PCNPP3	HK1_SE:453	3	1
12	left	94531250	94926250	8.06088e-12	4.9987e-16	RP11-74K11.1;PLXNC1	HK1_SE:458	2	1
12	right	94947500	95042500	0.000228491	4.71409e-06	TMCC3	HK1_SE:458	1	1
12	left	96202500	96602500	1.76179e-05	1.51788e-05	RP11-536G4.1	HK1_SE:461	1	1
12	left	96442500	96592500	7.81402e-11	8.28815e-11	LTA4H;RP11-256L6.4	HK1_SE:461	2	1
12	left	96453750	96606250	1.15341e-15	1.04524e-15	RP11-256L6.4	HK1_SE:461	1	1
12	right	96602500	96822500	5.96206e-07	1.63551e-11	RN7SKP11;AC021052.1	HK1_SE:461	2	1
12	right	106697500	106752500	0.00364439	0.000172498	POLR3B	HK1_SE:462	1	1
12	right	109087500	109240000	2.13594e-05	2.20414e-05	SSH1;MIR619;DAO	HK1_SE:463	3	1
12	right	109085000	109124166	4.53337e-20	3.79174e-20	CORO1C;Y_RNA	HK1_SE:463	2	1
12	left	110942500	110982500	0.00367096	0.000107722	VPS29;SNORD50;RAD9B	HK1_SE:464	3	1
12	left	120632500	120667500	0.000706947	0.000660836	GCN1L1;RPLP0;PXN-AS1	HK1_SE:465	3	1
12	left	123327500	123372500	3.74169e-05	3.6184e-05	HIP1R	HK1_SE:467	1	1
12	right	125004166	125056666	1.78631e-05	9.92731e-08	NCOR2	HK1_SE:469	1	1
12	left	125387500	125427500	0.00710829	0.000149481	RNU6-927P;UBC;MIR5188	HK1_SE:470	3	1
12	right	125392500	125477500	3.33902e-05	3.14579e-05	DHX37;BRI3BP	HK1_SE:470	2	1
1	left	939000	1001000	1.02271e-09	1.10481e-09	RP11-54O7.17;HES4;RP11-54O7.10;RP11-54O7.11;ISG15	HK1_SE:0	5	1
1	left	9845000	9925000	7.49996e-08	6.12131e-06	RP11-558F24.6	HK1_SE:2	1	1
1	left	9885500	9928500	2.47211e-07	2.60004e-07	CLSTN1	HK1_SE:2	1	1
1	left	9887500	9972500	3.96541e-14	3.50333e-14	CLSTN1	HK1_SE:2	1	1
1	left	9897500	9952500	3.83573e-06	0.000294535	CLSTN1;RP11-84A14.5	HK1_SE:2	2	1
1	right	9954166	10092500	6.61137e-12	2.87413e-09	AL590639.1;UBE4B	HK1_SE:2	2	1
1	left	12619166	12672500	5.01521e-18	5.4049e-18	RNU6ATAC18P	HK1_SE:5	1	1
1	right	15680000	15852500	0.000106711	0.00146843	CASP9;DNAJC16	HK1_SE:6	2	1
1	right	16121666	16238333	2.11936e-06	2.28628e-06	snoU13;RP1-134O19.3	HK1_SE:7	2	1
1	left	16122500	16167500	8.21941e-18	8.09236e-18	RP11-169K16.6;RP11-169K16.7	HK1_SE:8	2	1
1	right	16122500	16167500	8.21941e-18	8.09236e-18	RP11-169K16.8;RP11-169K16.9;SPEN	HK1_SE:7	3	1
1	left	16162500	16500000	1.03678e-07	0.000177581	RP11-169K16.8;RP11-169K16.9;SPEN	HK1_SE:10	3	1
1	right	16162500	16500000	1.03678e-07	0.000177581	RP11-276H7.3	HK1_SE:8	1	1
1	left	16403750	16508750	3.74235e-19	1.04524e-15	FAM131C	HK1_SE:10	1	1
1	right	16482500	16567500	0.00283092	0.00302692	ANO7P1;C1orf134;RSG1;MT1XP1	HK1_SE:9;HK1_SE:10	4	2
1	right	17542500	17617500	1.56416e-07	1.59886e-07	MIR3972	HK1_SE:11	1	1
1	right	17577500	17662500	0.000220834	0.000230206	AC004824.2	HK1_SE:11	1	1
1	right	19237500	19537500	4.55554e-11	3.96575e-11	UBR4;RP1-43E13.2	HK1_SE:12	2	1
1	right	23155000	23525000	5.11039e-05	0.0007726	HTR1D	HK1_SE:13	1	1
1	right	23155000	23885000	8.91659e-07	0.00042092	RP1-150O5.3;ID3	HK1_SE:13	2	1
1	left	26147500	26225000	2.13594e-05	2.27903e-07	RP1-317E23.6;RP1-317E23.3;MTFR1L;AL020996.1;RP1-317E23.7	HK1_SE:14	5	1
1	left	26187500	26227500	0.000366955	0.000394918	AUNIP;RP1-125I3.2;PAQR7	HK1_SE:14	3	1
1	right	26187500	26227500	0.000366955	0.000394918	STMN1;SNRPFP2;RP1-125I3.4;MIR3917;AL033528.1	HK1_SE:14	5	1
1	right	26226785	26321071	5.40908e-22	4.446e-22	PAFAH2;SCARNA17;SCARNA18	HK1_SE:14	3	1
1	left	27847500	27882500	4.85931e-05	4.93114e-05	RP1-159A19.4	HK1_SE:15	1	1
1	right	27881250	27930000	2.10534e-07	1.25564e-09	AHDC1	HK1_SE:15	1	1
1	right	27882500	27987500	5.56385e-06	4.98605e-06	RP1-159A19.3;RP11-288L9.1;IFI6;RP11-288L9.4;RNU6-949P	HK1_SE:15	5	1
1	left	33181666	33240000	1.18608e-12	1.02528e-12	SYNC;RP11-114B7.6	HK1_SE:16	2	1
1	right	33237500	33282500	0.000305398	0.000294535	YARS;S100PBP	HK1_SE:16	2	1
1	left	33419500	33469500	2.70682e-13	2.86872e-13	RNF19B	HK1_SE:17	1	1
1	right	36630833	36849166	5.63463e-16	1.93217e-13	STK40;LSM10	HK1_SE:18	2	1
1	right	36615833	36757500	6.88926e-08	6.46816e-08	SH3D21	HK1_SE:18	1	1
1	right	36637500	37942500	0.000264585	0.00055448	RP11-422J8.1;ZC3H12A	HK1_SE:18	2	1
1	left	39572954	39652045	4.73657e-10	4.5102e-10	RNU6-608P	HK1_SE:19	1	1
1	left	39601500	39650500	1.28573e-08	3.58794e-06	RNU6-608P	HK1_SE:19	1	1
1	right	39660000	39725000	0.00125972	0.00133372	RP11-420K8.1	HK1_SE:19	1	1
1	left	41325000	41367500	4.73657e-10	4.5102e-10	CITED4;RP5-1066H13.4	HK1_SE:20	2	1
1	right	41369166	41414166	0.000106518	0.000107722	RP11-348A7.1;UBE2V1P8	HK1_SE:20	2	1
1	right	43405000	43825000	0.000981937	0.0113628	RP1-92O14.3;CDC20;ELOVL1	HK1_SE:21	3	1
1	right	44232500	44505000	4.83983e-06	6.83078e-05	SLC6A9;RP5-1198O20.4	HK1_SE:22	2	1
1	left	85727500	85762500	0.00203694	4.93114e-05	C1orf52;Y_RNA;RP11-131L23.1	HK1_SE:24	3	1
1	left	85742500	85792500	1.56707e-06	1.64114e-06	Y_RNA;BCL10;RP11-131L23.1;AL590113.1	HK1_SE:24	4	1
1	right	85766250	86040000	1.56416e-07	1.59886e-07	DDAH1;RP11-290M5.4;CYR61	HK1_SE:24	3	1
1	left	98555000	98785000	1.29278e-10	7.92095e-08	NFU1P2	HK1_SE:30	1	1
1	right	109817500	109967500	1.56707e-06	2.50803e-11	PSMA5	HK1_SE:31	1	1
1	left	154162500	154387500	1.25734e-06	1.19788e-06	TPM3;MIR190B	HK1_SE:33	2	1
1	right	154375000	154455000	8.7262e-13	1.10269e-08	RP11-350G8.9	HK1_SE:33	1	1
1	left	154370000	154410000	0.00364439	0.00365081	RP11-350G8.5;IL6R	HK1_SE:33	2	1
1	right	154377500	154527500	3.36462e-07	9.15597e-06	UBE2Q1;UBE2Q1-AS1;CHRNB2	HK1_SE:33	3	1
1	right	154381500	154451500	3.49089e-08	3.69574e-08	RP11-350G8.9	HK1_SE:33	1	1
1	left	157963750	158003750	1.91039e-10	1.99191e-10	KIRREL	HK1_SE:34	1	1
1	right	157963750	158003750	1.91039e-10	1.99191e-10	KIRREL-IT1	HK1_SE:34	1	1
1	left	161361666	161708333	0.000108308	0.00196099	RRM2P2;RNU6-481P;RP11-122G18.7	HK1_SE:35	3	1
1	left	161500000	161700000	1.17913e-06	1.04217e-06	HSPA6;RPS23P10	HK1_SE:35	2	1
1	left	161592500	161707500	1.76179e-05	1.51788e-05	FCGR3A;RPS23P9;FCGR3B	HK1_SE:35	3	1
1	right	172960833	173015833	0.000106518	0.00359558	TNFSF18	HK1_SE:38	1	1
1	left	181003863	181120681	5.92631e-28	2.02342e-23	STX6;MR1	HK1_SE:39	2	1
1	left	181003676	181054264	5.35286e-20	5.07149e-20	STX6;MR1	HK1_SE:39	2	1
1	left	182932500	183247500	3.33902e-05	3.14579e-05	SHCBP1L;RP11-505O17.1;KRT18P28;AL450304.1	HK1_SE:41	4	1
1	left	182995000	183247500	0.00354321	0.0036095	LAMC1	HK1_SE:41	1	1
1	right	183132500	183247500	2.54803e-11	8.8488e-09	RP11-548N1.1	HK1_SE:40	1	1
1	left	186375000	186955000	6.56792e-07	5.73174e-07	AL596220.1;OCLM	HK1_SE:43	2	1
1	right	186455000	186648750	6.5719e-20	2.31377e-16	PTGS2;RP5-973M2.2	HK1_SE:42	2	1
1	left	186648750	186952500	8.7073e-05	9.07266e-05	PTGS2;RP5-973M2.2	HK1_SE:43	2	1
1	left	186800000	186962500	1.11575e-11	1.04892e-11	PLA2G4A	HK1_SE:43	1	1
1	left	199712500	199752500	0.00190502	0.00191662	RP11-2L13.1	HK1_SE:44	1	1
1	left	201367500	201407500	3.83573e-06	3.98997e-06	LAD1	HK1_SE:45	1	1
1	left	201402500	201437500	2.86262e-05	0.000973973	TNNI1;RP11-134G8.2	HK1_SE:45	2	1
1	right	201402500	201437500	2.86262e-05	0.000973973	RP11-134G8.8;PHLDA3	HK1_SE:45	2	1
1	left	202315000	202575000	7.24025e-07	6.42337e-07	UBE2T;PPP1R12B	HK1_SE:46	2	1
1	left	202450000	202575000	5.94168e-13	5.52714e-13	RP11-175B9.3	HK1_SE:46	1	1
1	left	202508500	202555500	1.87481e-08	1.50328e-06	SNORA70	HK1_SE:46	1	1
1	left	205193750	205235000	0.00367096	0.000107722	DSTYK;TMCC2;RP11-383G10.5	HK1_SE:47	3	1
1	right	207187500	207225000	0.00120719	0.00111423	snoU13;YOD1;PFKFB2	HK1_SE:48	3	1
1	left	207212500	209562500	2.16465e-09	6.77377e-09	C1orf116;snoU13;YOD1;PFKFB2	HK1_SE:50;HK1_SE:51;HK1_SE:52	4	3
1	left	207212500	208387500	0.000117079	0.000216004	C1orf116;snoU13;YOD1;PFKFB2	HK1_SE:49	4	1
1	right	207202500	207492500	9.87889e-06	9.15597e-06	CD55	HK1_SE:48	1	1
1	left	209542500	209587500	5.13846e-19	3.36984e-13	RP11-372M18.2	HK1_SE:52;HK1_SE:53	1	2
1	right	209542500	209587500	5.13846e-19	3.36984e-13	MIR205HG	HK1_SE:50;HK1_SE:51	1	2
1	left	209552115	209602115	8.89115e-23	7.3098e-23	RP11-372M18.2	HK1_SE:53	1	1
1	right	209552115	209602115	8.89115e-23	7.3098e-23	MIR205HG	HK1_SE:50;HK1_SE:51	1	2
1	right	209585000	209985000	0.000921104	3.05995e-05	IRF6	HK1_SE:52;HK1_SE:53	1	2
1	right	209583000	209827000	6.96721e-19	1.26198e-09	LAMB3	HK1_SE:52;HK1_SE:53	1	2
1	left	214650000	214697500	0.000589747	0.000571758	RP11-365D23.4	HK1_SE:54	1	1
1	right	214695000	214772500	0.0108544	0.000480229	CENPF;ABHD17AP3;RP11-365D23.2	HK1_SE:54	3	1
1	left	221917500	221982500	0.00016076	0.000172498	DUSP10	HK1_SE:55	1	1
1	left	226252500	226315000	1.56707e-06	8.8488e-09	RP11-396C23.4;H3F3A	HK1_SE:56	2	1
1	left	226272500	226307500	0.00367096	0.000107722	RP11-396C23.2	HK1_SE:56	1	1
1	right	226313500	226378500	4.43877e-19	4.47902e-19	ACBD3;RP11-275I14.2	HK1_SE:56	2	1
10	left	33505000	33585000	3.32331e-05	3.50901e-05	RP11-342D11.2	HK1_SE:355	1	1
10	left	46965000	47055000	5.19533e-08	5.36434e-08	RP11-38L15.2;RP11-38L15.3;SYT15	HK1_SE:357	3	1
10	left	47005000	47055000	1.26783e-12	2.67031e-06	GPRIN2	HK1_SE:357	1	1
10	left	63595000	63785000	2.50392e-05	2.2491e-05	RP11-491H19.1	HK1_SE:363	1	1
10	left	69615000	69835000	0.00130209	2.10805e-05	RP11-57G10.8	HK1_SE:364	1	1
10	right	69841666	70088333	6.95308e-08	0.000579839	PBLD;HNRNPH3	HK1_SE:364	2	1
10	right	69850192	69907884	2.58817e-30	9.23341e-24	RN7SKP202	HK1_SE:364	1	1
10	right	71077500	71112500	0.000305398	0.000294535	AC016821.1	HK1_SE:365	1	1
10	left	79805000	80950000	1.19346e-05	6.09595e-07	RPS24	HK1_SE:373	1	1
10	left	80512500	80962500	1.24265e-08	1.39886e-05	AC074323.1	HK1_SE:373	1	1
10	left	80826500	80951500	3.74235e-19	6.31878e-23	ZMIZ1-AS1;ZMIZ1	HK1_SE:373	2	1
10	left	80827500	80915000	4.85588e-07	4.98874e-07	ZMIZ1-AS1;ZMIZ1	HK1_SE:372	2	1
10	right	95199375	95241875	5.79412e-26	6.05748e-26	MYOF;CEP55	HK1_SE:376	2	1
10	left	98605000	99175000	1.15735e-05	1.14257e-06	LCOR	HK1_SE:377	1	1
10	left	99332500	99410000	1.91039e-10	1.99191e-10	ANKRD2;HOGA1;PI4K2A;PI4K2A	HK1_SE:378	4	1
10	right	99410000	99447500	3.62771e-05	1.23952e-07	AVPI1	HK1_SE:378	1	1
10	left	104155000	104405000	0.00481181	5.58451e-05	NFKB2	HK1_SE:379	1	1
10	left	104187500	104405000	8.2875e-07	1.1321e-08	PSD;FBXL15;CUEDC2;MIR146B	HK1_SE:379	4	1
10	left	104363750	104403750	0.000837306	0.000888864	RNU6-43P	HK1_SE:379	1	1
10	right	104410000	104480000	1.35403e-15	1.42341e-15	ARL3;SFXN2	HK1_SE:379	2	1
10	left	104615000	104995000	0.000143315	0.000134276	PFN1P11;PTGES3P4;C10orf32;C10orf32-ASMT;RNU6-372P;AS3MT	HK1_SE:380	6	1
10	left	104875500	104997500	4.85588e-07	3.05713e-05	RP11-332O19.2	HK1_SE:380	1	1
10	right	105637500	105847500	2.61502e-05	2.58117e-05	COL17A1	HK1_SE:382	1	1
10	left	112070000	112165000	0.00694757	0.000569427	SMNDC1	HK1_SE:383	1	1
10	right	112165000	112325000	0.00025018	0.0188552	RP11-73H14.1;SMC3;snoU13	HK1_SE:383	3	1
10	right	112167000	112258000	8.93094e-31	1.16017e-24	RP11-525A16.4;DUSP5	HK1_SE:383	2	1
10	right	112174166	112214166	1.01145e-06	1.10282e-06	HMGB3P5	HK1_SE:383	1	1
10	left	120965500	121075500	3.49089e-08	8.28815e-11	GRK5;RP11-567J24.4;RN7SL749P	HK1_SE:385	3	1
10	left	120963750	121013750	2.29284e-10	2.49229e-10	GRK5;RP11-567J24.4;RN7SL749P	HK1_SE:384	3	1
10	right	121010000	121420000	0.00269542	0.0253822	BAG3	HK1_SE:384	1	1
10	right	121075000	121415000	9.47705e-07	8.73196e-07	BAG3	HK1_SE:385	1	1
10	left	121305000	121415000	5.19533e-08	5.36434e-08	RGS10	HK1_SE:386	1	1
10	right	121446250	121491250	6.32328e-07	6.60691e-07	INPP5F	HK1_SE:386	1	1
10	left	123687500	123815000	0.00145157	0.00146843	ATE1;RP11-500G22.2	HK1_SE:390	2	1
10	left	123735000	123875000	4.88094e-11	6.24869e-08	NSMCE4A;TACC2	HK1_SE:390	2	1
10	left	134139166	134215833	2.80551e-06	7.54171e-05	STK32C;LRRC27	HK1_SE:391	2	1
10	right	134490000	135072500	1.48746e-09	1.60712e-09	MIR202	HK1_SE:392	1	1
4	right	11547500	11617500	2.86262e-05	3.05713e-05	RP11-281P23.2	HK1_SE:177	1	1
4	left	40992500	41027500	0.00016076	0.000172498	RNA5SP160	HK1_SE:181	1	1
4	left	57942500	57977500	3.83573e-06	0.000294535	UBE2CP3	HK1_SE:183	1	1
4	right	57942500	57977500	3.83573e-06	0.000294535	IGFBP7;snoU13;IGFBP7-AS1	HK1_SE:183	3	1
4	right	57977500	58012500	0.0035246	0.00376037	RP11-300M6.1	HK1_SE:183	1	1
4	left	69225000	69905000	0.000718819	0.00802665	YTHDC1	HK1_SE:185	1	1
4	right	69225000	69905000	0.000718819	0.00802665	RP11-813N20.3;UGT2B7	HK1_SE:184	2	1
4	left	74575000	74975000	1.53469e-10	7.04169e-05	AC112518.3	HK1_SE:186	1	1
4	left	74732500	75002500	2.81287e-07	4.43263e-06	PF4V1;CXCL1	HK1_SE:186	2	1
4	left	74902500	74977500	0.000366955	0.000394918	CXCL3	HK1_SE:186	1	1
4	right	169015000	169405000	0.000284503	0.00026845	SNORA51;PALLD	HK1_SE:191	2	1
4	right	173905000	174105000	5.76224e-05	2.15233e-07	RP11-10K16.1	HK1_SE:192	1	1
4	right	173947500	174092500	6.37632e-10	5.83238e-10	RP11-10K16.1;GALNT7	HK1_SE:192	2	1
4	left	187647916	187760416	9.27697e-23	9.59222e-23	FAT1	HK1_SE:194	1	1
4	right	187767500	187802500	1.29908e-07	1.23952e-07	RP11-11N5.1;RP11-11N5.3	HK1_SE:194	2	1
6	left	30717954	30782500	0	0	FLOT1;Y_RNA;XXbac-BPG252P9.10;IER3;RN7SL353P	HK1_SE:220	5	1
6	right	42107500	42190000	8.7073e-05	9.07266e-05	MRPS10	HK1_SE:221	1	1
6	right	42307500	42372500	2.48316e-08	3.98997e-06	U3	HK1_SE:222	1	1
6	right	42307500	42537500	0.00145157	0.000100568	UBR2	HK1_SE:222	1	1
6	left	43597500	43689166	2.86262e-05	4.98874e-07	GTPBP2;MAD2L1BP	HK1_SE:223	2	1
6	left	43672500	43707500	0.000477668	0.000480229	RP1-261G23.4	HK1_SE:223	1	1
6	left	45392500	45672500	8.19217e-05	0.000770561	RP1-244F24.1	HK1_SE:226	1	1
6	left	45557500	45622500	1.46905e-06	1.50328e-06	RP1-166H4.2	HK1_SE:225	1	1
6	left	53187500	53487500	1.59864e-05	0.00281394	RPS16P5	HK1_SE:227	1	1
6	left	53355000	53515000	1.41636e-07	1.22037e-07	RP1-27K12.4	HK1_SE:227	1	1
6	left	106905000	106960000	0.00283092	0.00302692	RNA5SP211;Y_RNA	HK1_SE:230	2	1
6	right	109062500	109102500	1.91039e-10	1.99191e-10	ZNF259P1	HK1_SE:231	1	1
6	left	125635000	126285000	8.77697e-11	1.03129e-08	HDDC2	HK1_SE:232	1	1
6	left	126108214	126276785	7.51726e-11	1.48427e-08	NCOA7	HK1_SE:232	1	1
6	left	143606500	143651500	2.54803e-11	8.8488e-09	RP1-95L4.2	HK1_SE:234	1	1
6	left	150392500	150582500	0.00608815	0.000572385	ULBP3	HK1_SE:236	1	1
6	left	150468333	150571666	1.00816e-06	1.05214e-06	PPP1R14C	HK1_SE:236	1	1
6	right	150585000	150657500	9.38612e-08	1.71738e-05	RNU4-7P	HK1_SE:236	1	1
6	left	159067500	159112500	0.0035246	0.00376037	DYNLT1;SYTL3	HK1_SE:238	2	1
6	right	159125000	159395000	7.48777e-12	4.0787e-09	RP1-111C20.4	HK1_SE:238	1	1
6	right	170537500	170600000	0.00364439	0.000172498	RP5-894D12.5;DLL1;FAM120B;RP5-894D12.4	HK1_SE:239	4	1
13	left	42535357	42615357	6.76398e-19	3.6571e-14	VWA8	HK1_SE:473	1	1
13	right	45287500	45787500	2.16561e-07	0.00012034	KCTD4	HK1_SE:476	1	1
13	right	45332500	45390000	8.97186e-24	9.23341e-24	LINC00330	HK1_SE:476	1	1
13	left	78100000	80062500	4.2973e-05	9.30278e-07	SCEL	HK1_SE:481	1	1
13	right	78100000	80062500	4.2973e-05	9.30278e-07	NDFIP2-AS1;NDFIP2	HK1_SE:480	2	1
13	right	106735000	107182500	0.00694757	0.000569427	EFNB2	HK1_SE:483	1	1
13	right	106758000	106803000	9.38612e-08	1.71738e-05	RNA5SP38	HK1_SE:483	1	1
13	right	106802500	107180000	0.0025542	0.000236297	EFNB2	HK1_SE:483	1	1
13	right	109805833	110437500	5.56385e-06	2.03834e-07	IRS2	HK1_SE:484	1	1
13	right	109812500	109850000	3.74169e-05	3.6184e-05	MYO16-AS1	HK1_SE:484	1	1
13	right	109912500	111362500	0.000253922	0.0102809	CARS2;ING1	HK1_SE:485	2	1
13	right	110662500	111562500	4.2973e-05	0.00279465	ANKRD10;ANKRD10-IT1	HK1_SE:486	2	1
3	right	5025000	5165000	3.27433e-10	6.12544e-08	ARL8B	HK1_SE:136	1	1
3	right	13865000	13925000	6.56792e-07	5.73174e-07	WNT7A	HK1_SE:137	1	1
3	right	13892500	13932500	0.0125576	0.00146843	WNT7A	HK1_SE:137	1	1
3	right	27587500	28387500	0.000308165	0.000574585	AZI2;ZCWPW2	HK1_SE:138	2	1
3	right	45187500	45267500	6.92731e-05	7.43645e-05	TMEM158;AC010170.1	HK1_SE:139	2	1
3	right	99622500	99985000	0.000106711	0.00146843	TBC1D23	HK1_SE:142	1	1
3	right	111617500	111687500	0.00190502	0.00191662	ABHD10	HK1_SE:144	1	1
3	left	112294500	112358500	0.00203694	6.43495e-07	ATG3;SLC35A5	HK1_SE:145	2	1
3	right	123450000	123680000	0.0334508	0.0366353	CCDC14	HK1_SE:147	1	1
3	right	125931666	125998333	2.11936e-06	0.00184631	RP11-71E19.1;RP11-71E19.2	HK1_SE:149	2	1
3	left	126012500	126637500	3.20336e-06	0.00804045	RP11-71E19.2	HK1_SE:151	1	1
3	right	134035192	134084423	1.0353e-16	1.10905e-16	RPL39P5;AMOTL2	HK1_SE:152	2	1
3	left	149099166	149297500	1.71532e-08	1.42721e-08	TM4SF1;TM4SF1-AS1;RP11-278L15.2	HK1_SE:153	3	1
3	right	150085000	150127500	2.16635e-07	2.36479e-07	TSC22D2	HK1_SE:154	1	1
3	right	159482500	160282500	0.000283654	0.00480671	KPNA4;KRT8P12	HK1_SE:155	2	1
3	left	159487500	159522500	0.000366955	1.26465e-05	IQCJ-SCHIP1-AS1	HK1_SE:155	1	1
3	right	159487500	159522500	0.000366955	1.26465e-05	RNU2-31P	HK1_SE:155	1	1
3	left	168587500	168850000	2.05032e-06	1.96363e-06	RPL21P43	HK1_SE:156	1	1
3	left	176905000	177315000	7.24025e-07	5.42466e-05	TBL1XR1	HK1_SE:161	1	1
3	left	176912500	177074166	8.0491e-29	3.37632e-34	TBL1XR1	HK1_SE:160	1	1
3	left	177012500	177312500	5.6479e-06	5.1924e-06	LINC00501;ASS1P7	HK1_SE:161	2	1
3	left	177011500	177070500	2.10534e-07	2.27903e-07	LINC00501;ASS1P7	HK1_SE:160	2	1
3	left	177077500	177314166	2.69181e-06	4.6024e-08	RP11-706D8.3	HK1_SE:161	1	1
3	left	177162500	177315000	4.95717e-09	4.66247e-09	LINC00578	HK1_SE:161	1	1
3	right	177315000	177395000	0.000564418	0.000605215	RP11-114M1.1	HK1_SE:161	1	1
3	left	182980000	183047500	9.38612e-08	1.71738e-05	B3GNT5;RNA5SP151	HK1_SE:164	2	1
3	left	187460000	188397500	0.000310193	0.000290788	BCL6;RP11-211G3.2	HK1_SE:165	2	1
3	right	188387500	188662500	1.13629e-15	6.14327e-09	TPRG1-AS1;TPRG1	HK1_SE:165	2	1
3	right	188987500	189555000	0.000543794	0.000569427	MIR944	HK1_SE:166	1	1
3	right	189797500	189832500	0.00283092	0.00302692	LEPREL1;RN7SL486P;LEPREL1-AS1	HK1_SE:168	3	1
3	left	190045000	190095000	1.18955e-08	0.000122103	CLDN1;CLDN16	HK1_SE:169	2	1
3	right	192597500	192632500	1.25256e-09	1.19008e-09	MB21D2	HK1_SE:170	1	1
3	right	192587500	193312500	2.01514e-13	1.83203e-13	ATP13A4;RP11-175P19.2;OPA1	HK1_SE:170	3	1
3	right	192612500	193862500	0.00172062	7.81588e-05	RP11-135A1.2;HES1;RN7SL215P	HK1_SE:170	3	1
3	right	193595000	193785000	2.3178e-06	0.000502906	RP11-407B7.1	HK1_SE:171	1	1
3	right	193597500	193855625	8.98006e-17	3.61383e-14	RP11-135A1.2;HES1;RN7SL215P	HK1_SE:171	3	1
3	left	196470833	196515833	1.78631e-05	1.71738e-05	PAK2;U4	HK1_SE:172	2	1
3	left	196505000	197025000	0.000741866	0.00732559	RNU6-42P	HK1_SE:173	1	1
3	left	196754166	197254166	3.64863e-12	2.45309e-07	MFI2	HK1_SE:175	1	1
3	left	197023500	197236000	4.0025e-22	4.13022e-22	DLG1;MIR4797;DLG1-AS1	HK1_SE:175	3	1
3	right	197023500	197236000	4.0025e-22	4.13022e-22	RP13-616I3.1;AC128709.1	HK1_SE:173	2	1
3	right	197187500	197227500	0.00429446	7.39759e-05	RP13-616I3.1;AC128709.1	HK1_SE:175	2	1
16	left	1355000	1755000	0.00220589	9.38899e-05	RP11-616M22.7;UBE2I	HK1_SE:554	2	1
16	left	1462500	1762500	6.18897e-09	5.41319e-09	UNKL;LA16c-312E8.2	HK1_SE:554	2	1
16	right	1727500	1772500	9.1596e-06	2.04809e-08	LA16c-329F2.1;MIR3177	HK1_SE:554	2	1
16	right	1737500	1987500	0.00465354	0.00498581	MSRB1	HK1_SE:554	1	1
16	right	1748750	1825000	0.000477668	0.000480229	NME3;MRPS34;EME2;NUBP2	HK1_SE:554	4	1
16	left	4542500	4997500	4.55399e-11	4.48526e-08	NMRAL1	HK1_SE:555	1	1
16	left	4667500	4994166	0.000394877	0.0105592	UBALD1;MGRN1	HK1_SE:555	2	1
16	left	4737500	5002500	9.87889e-06	2.92981e-07	NUDT16L1	HK1_SE:555	1	1
16	left	4852500	4999166	3.14675e-10	3.01651e-10	SEPT12;SMIM22;RP11-127I20.5;ROGDI;AC020663.1	HK1_SE:555	5	1
16	right	5007500	5082500	0.00125972	0.00133372	NAGPA;ALG1	HK1_SE:555	2	1
16	right	11677500	11727500	2.86262e-05	0.000973973	LITAF	HK1_SE:557	1	1
16	left	27185000	27325000	1.20127e-08	1.61744e-05	RP11-673P17.4	HK1_SE:559	1	1
16	left	67587500	68687500	6.92408e-05	0.00393307	CTD-2012K14.2;CTD-2012K14.3;CTD-2012K14.4;CTD-2012K14.6;CTD-2012K14.7;CTCF	HK1_SE:561	6	1
16	left	68275000	68695000	0.00380513	0.000134276	RP11-96D1.11;ESRP2;RP11-96D1.6;PLA2G15	HK1_SE:561	4	1
16	left	68565833	68694166	2.10534e-07	1.25564e-09	ZFP90;RNU4-36P	HK1_SE:561	2	1
16	right	68695000	68782500	9.19196e-06	0.000571758	CDH1;RNA5SP429	HK1_SE:561	2	1
16	left	68697500	69027500	0.0025542	0.000236297	RP11-615I2.3	HK1_SE:564	1	1
16	right	68697500	69027500	0.0025542	0.000236297	RNU6-898P	HK1_SE:561	1	1
16	left	68696500	68834500	2.10534e-07	2.20414e-05	RP11-615I2.3	HK1_SE:562	1	1
16	left	69028125	69144375	5.58158e-10	6.17756e-10	RNU6-898P	HK1_SE:565	1	1
16	right	69028125	69144375	5.58158e-10	6.17756e-10	HAS3;CHTF8	HK1_SE:564	2	1
16	left	69362500	69457500	0.0035246	0.000230206	COG8;PDF;RP11-343C2.12;NIP7	HK1_SE:566	4	1
16	right	69435000	69755000	4.2292e-05	4.61151e-05	NQO1;snoU13;CTD-2033A16.1;CTD-2033A16.3	HK1_SE:566	4	1
16	right	69457500	69602500	2.13925e-08	9.94583e-06	NFAT5;MIR1538	HK1_SE:566	2	1
16	right	70720000	70782500	8.2855e-18	1.67792e-10	RP11-394B2.6;VAC14-AS1	HK1_SE:567	2	1
16	right	70745000	71325000	0.000102578	0.00174042	CMTR2;CTD-2520I13.1	HK1_SE:567	2	1
16	left	75234166	75430833	4.73527e-15	2.02342e-23	RP11-331F4.1;CTRB2	HK1_SE:569	2	1
16	left	75372500	75407500	4.85931e-05	0.00199217	RP11-252K23.1	HK1_SE:569	1	1
16	right	75372500	75407500	4.85931e-05	0.00199217	RP11-252K23.2	HK1_SE:568	1	1
16	right	82665000	83035000	0.000143315	0.00366416	CTD-3253I12.1	HK1_SE:572	1	1
16	left	84652500	85032500	1.40892e-06	1.22215e-06	COTL1	HK1_SE:573	1	1
16	left	85205000	85555000	0.000806787	0.00076351	CTC-786C10.1	HK1_SE:575	1	1
16	left	85335000	85430000	7.85431e-06	8.29984e-06	MIR5093	HK1_SE:574	1	1
16	right	85385000	85647500	2.80551e-06	2.60212e-06	GSE1	HK1_SE:574	1	1
16	left	85385000	85557500	0.000258212	0.0184323	RP11-680G10.1	HK1_SE:575	1	1
16	left	87814852	87899264	0	0	RP4-536B24.4	HK1_SE:577	1	1
16	right	87814852	87899264	0	0	SLC7A5	HK1_SE:577	1	1
16	right	87812500	87980000	7.53704e-05	0.000903509	CA5A;CTD-3057O21.1;BANP	HK1_SE:577	3	1
11	right	2207500	2435833	0.0182713	0.000582031	TSSC4;AC124057.5;TRPM5	HK1_SE:393	3	1
11	left	6345000	7625000	4.55836e-07	1.19946e-05	PRKCDBP	HK1_SE:394	1	1
11	left	9595000	9925000	2.32497e-05	2.10805e-05	WEE1;snoU13;RN7SL56P	HK1_SE:397	3	1
11	left	9635000	9865000	0.000121884	0.000119115	RP11-16F15.1	HK1_SE:396	1	1
11	left	9635000	9925000	2.32497e-05	2.10805e-05	RP11-16F15.1	HK1_SE:397	1	1
11	left	9782500	9925000	1.15341e-15	1.04524e-15	RP11-540A21.2;SBF2-AS1	HK1_SE:397	2	1
11	right	9858333	10321666	3.94776e-09	3.92727e-06	SBF2;RP11-351I24.1;ADM;AMPD3	HK1_SE:396	4	1
11	right	9925833	10325833	0.000935164	0.0083976	SBF2;RP11-351I24.1;ADM;AMPD3	HK1_SE:397	4	1
11	left	10922500	10957500	0.000837306	0.000888864	CTD-2003C8.2	HK1_SE:399	1	1
11	right	12110000	12307500	2.47211e-07	8.93644e-10	MICALCL	HK1_SE:400	1	1
11	left	34638333	35178333	1.51118e-08	0.000505776	EHF	HK1_SE:407	1	1
11	left	34949642	35007500	0.00111026	0.0010752	APIP;PDHX;MIR1343	HK1_SE:406	3	1
11	right	34997500	35172500	4.03388e-09	3.86431e-09	RP4-607I7.1;CD44	HK1_SE:406	2	1
11	right	35175000	35645000	0.00220589	0.0021394	FJX1	HK1_SE:407	1	1
11	left	57437500	57567500	3.36462e-07	2.92981e-07	ZDHHC5	HK1_SE:409	1	1
11	left	60937500	61137500	7.76481e-11	2.66258e-07	VPS37C	HK1_SE:410	1	1
11	right	64328333	64421666	5.38407e-05	5.78509e-05	AP001092.4	HK1_SE:412	1	1
11	right	64617500	64778500	9.68569e-11	2.66548e-08	BATF2;ARL2;RP11-399J13.3	HK1_SE:413	3	1
11	right	64614642	64656071	6.99e-43	0	EHD1;AP001187.11;AP001187.1;RP11-665N17.4;MIR192;MIR194-2	HK1_SE:413	6	1
11	left	65142500	65237500	1.65161e-21	2.14251e-12	RP11-867O8.5;SLC25A45;FRMD8	HK1_SE:414	3	1
11	left	65190576	65268653	2.75418e-40	2.17768e-31	NEAT1	HK1_SE:414	1	1
11	left	67028750	67081875	6.1584e-41	6.0198e-41	ADRBK1	HK1_SE:415	1	1
11	right	67087500	67787500	3.15426e-06	2.43523e-08	ALDH3B1;RP5-901A4.1;NDUFS8;MIR4691	HK1_SE:415	4	1
11	right	67087500	67122500	7.72751e-07	0.000651319	POLD4;RN7SKP239	HK1_SE:415	2	1
11	left	69502500	69927500	0.00652191	0.000770561	ORAOV1	HK1_SE:420	1	1
11	right	71015000	71325000	6.28514e-05	6.52366e-05	KRTAP5-11;AP000867.1;UNC93B6;OR7E4P	HK1_SE:421	4	1
11	right	72897500	72942500	2.47211e-07	2.60004e-07	P2RY2;RP11-800A3.4	HK1_SE:422	2	1
11	left	101787500	102137500	9.23004e-06	7.72895e-05	ANGPTL5;KIAA1377	HK1_SE:424	2	1
11	right	102140000	102177500	2.86262e-05	3.05713e-05	RP11-864G5.1;RP11-864G5.7;RP11-864G5.8;RNU6-952P;BIRC3	HK1_SE:424	5	1
11	right	119547500	119598750	4.85588e-07	4.98874e-07	PVRL1;CTD-2523D13.2	HK1_SE:425	2	1
11	right	124932500	124982500	7.53704e-05	0.000903509	TMEM218;KRT18P59	HK1_SE:427	2	1
19	left	1655000	1747500	1.37455e-13	1.99191e-10	TCF3	HK1_SE:629	1	1
19	left	2162500	4062500	1.65131e-05	0.00091778	AP3D1;DOT1L	HK1_SE:632	2	1
19	left	4000833	4059166	0.0120744	0.000868542	PIAS4	HK1_SE:632	1	1
19	left	4245000	4365000	0.0112059	0.000137358	CCDC94	HK1_SE:633	1	1
19	left	12898333	13958333	4.55836e-07	1.19946e-05	CTD-2659N19.9;MIR5684;JUNB;PRDX2;CTD-2659N19.10	HK1_SE:635	5	1
19	left	13262500	14637500	0.000503713	4.35495e-05	CTC-250I14.3;STX10;IER2;CTC-250I14.6;CTC-250I14.1	HK1_SE:636	5	1
19	right	13262500	14637500	0.000503713	4.35495e-05	DNAJB1;TECR;MIR639	HK1_SE:634	3	1
19	left	13272500	13962500	0.000283654	0.000375579	STX10;IER2;CTC-250I14.6;CTC-250I14.1	HK1_SE:635	4	1
19	right	13272500	13962500	0.000283654	0.000375579	NANOS3	HK1_SE:634	1	1
19	left	13902000	13962000	3.95519e-27	2.97239e-27	AC008686.1;ZSWIM4;CTD-3252C9.2	HK1_SE:635	3	1
19	right	13962500	15937500	9.07357e-09	3.1989e-08	ZNF861P;AC004510.3;UCA1	HK1_SE:635	3	1
19	left	13965000	14615000	0.00711511	6.10143e-05	NANOS3	HK1_SE:636	1	1
19	right	13965000	14615000	0.00711511	6.10143e-05	GIPC1;TECR	HK1_SE:635	2	1
19	left	14247500	14607500	2.80551e-06	6.62417e-08	ASF1B;CTB-55O6.12	HK1_SE:636	2	1
19	left	14492500	14627500	0.000106711	0.000100568	CTC-548K16.2;CD97	HK1_SE:636	2	1
19	right	14610000	14670000	4.85931e-05	4.93114e-05	NDUFB7	HK1_SE:636	1	1
19	left	45907500	45947500	0.000133762	6.87811e-07	PPP1R13L;CD3EAP	HK1_SE:641	2	1
19	left	48012500	48212500	3.46571e-11	3.08413e-06	NAPA	HK1_SE:642	1	1
8	left	10511666	10575833	3.64649e-14	6.6075e-11	MIR4286	HK1_SE:278	1	1
8	left	12900000	13235000	0.002215	0.000245233	RNU6-842P	HK1_SE:279	1	1
8	right	17592500	17660500	9.65256e-14	9.08478e-14	MTUS1;RP11-156K13.1;RP11-806O11.1	HK1_SE:280	3	1
8	left	25039166	25080833	0.020929	0.0211922	RN7SL651P;DOCK5	HK1_SE:281	2	1
8	left	32127500	32165000	7.27511e-07	6.87811e-07	RNA5SP263	HK1_SE:283	1	1
8	right	48267500	48872500	0.000317442	0.000300203	PRKDC;MCM4	HK1_SE:284	2	1
8	right	49616388	49834722	2.82438e-30	2.71226e-30	RP11-22C8.1;SNAI2	HK1_SE:285	2	1
8	left	53650000	54437500	6.02362e-16	4.82846e-08	RB1CC1;CTD-3214K23.1	HK1_SE:288	2	1
8	right	53650000	54437500	6.02362e-16	4.82846e-08	RP11-400K9.3;RP11-400K9.4;RP11-400K9.1;RP11-400K9.2	HK1_SE:286	4	1
8	left	53657916	53745000	3.0748e-13	2.97982e-13	RB1CC1	HK1_SE:287	1	1
8	right	53742500	53852500	2.47211e-07	8.93644e-10	NPBWR1	HK1_SE:287	1	1
8	right	54437500	55037500	0.000369432	0.000448985	MRPL15	HK1_SE:288	1	1
8	left	54755833	54867500	1.62876e-06	0.000107722	ATP6V1H;RGS20	HK1_SE:289	2	1
8	right	54855000	55015000	5.76224e-05	0.00517366	LYPLA1	HK1_SE:289	1	1
8	right	54857500	54935000	0.000106518	0.000107722	TCEA1	HK1_SE:289	1	1
8	right	98942500	99057500	7.68564e-05	7.39759e-05	RPL30;KB-1208A12.3;SNORA72;RNU6-703P	HK1_SE:294	4	1
8	left	101577500	101687045	1.03296e-14	4.72292e-19	ANKRD46;GAPDHP62	HK1_SE:295	2	1
8	right	101700000	101840000	4.75739e-09	4.9366e-09	RNU4-83P	HK1_SE:295	1	1
8	left	102387500	102447500	3.29206e-09	3.11396e-09	NACAP1;DUXAP2	HK1_SE:297	2	1
8	right	119028676	119116029	1.54402e-08	6.07692e-20	EXT1	HK1_SE:300	1	1
8	left	125865000	127465000	4.16876e-05	6.90274e-06	RP11-1082L8.3;LINC00964	HK1_SE:303	2	1
8	right	127454375	127570625	6.4405e-12	8.09106e-09	FAM84B;RP11-103H7.5;RP11-89K10.1	HK1_SE:303	3	1
8	left	127525000	127825000	7.24025e-07	6.42337e-07	RP11-103H7.2;RNU6-869P;RP11-103H7.3	HK1_SE:304	3	1
8	right	127837500	128500000	0.000103544	4.81074e-09	CASC8	HK1_SE:304	1	1
8	right	127845833	130704166	3.01234e-12	2.00451e-16	CCDC26;RP11-419K12.1	HK1_SE:304	2	1
8	right	127840500	128226500	0.0247356	0.000312848	RP11-255B23.4;CCAT1	HK1_SE:304	2	1
8	left	128230000	128867500	0.00357121	0.00344477	RP11-255B23.4;CCAT1	HK1_SE:307	2	1
8	left	128232083	128678750	4.83348e-19	4.382e-19	CCAT1	HK1_SE:306	1	1
8	left	128307500	128867500	2.81287e-07	4.43263e-06	RP11-382A18.3	HK1_SE:307	1	1
8	left	128495000	128865000	0.000143315	0.000134276	CASC8	HK1_SE:307	1	1
8	left	128751500	128864500	3.2514e-15	1.19748e-19	CASC11;MYC	HK1_SE:307	2	1
8	right	129197500	129567500	1.99973e-07	1.85699e-07	RP11-89M16.1	HK1_SE:308	1	1
8	left	130964500	131016500	2.14326e-06	2.32365e-06	RP11-473O4.3	HK1_SE:309	1	1
8	right	130987500	131027500	4.85931e-05	0.00199217	FAM49B;RNU7-181P;MIR5194	HK1_SE:309	3	1
8	left	141735000	142085000	6.56792e-07	0.000119115	MIR151A	HK1_SE:313	1	1
8	right	141732500	142142500	8.19217e-05	0.000770561	RP11-809O17.1	HK1_SE:311	1	1
8	left	141737500	142172500	2.10182e-05	0.000312848	MIR151A	HK1_SE:314	1	1
8	right	142012500	143762500	2.16465e-09	6.77377e-09	JRK;PSCA	HK1_SE:312	2	1
8	left	142020000	142085000	7.58349e-26	1.21922e-15	PTK2	HK1_SE:313	1	1
8	left	142140000	142182500	3.62771e-05	1.23952e-07	DENND3;RP11-809O17.1	HK1_SE:314	2	1
8	right	142199166	142357500	2.61502e-05	7.09813e-07	CTD-3064M3.1;CTD-3064M3.3	HK1_SE:314	2	1
14	left	22747500	22782500	0.00364439	0.00365081	TRAV37;TRAV38-1;TRAV38-2DV8	HK1_SE:489	3	1
14	right	22747500	22782500	0.00364439	0.00365081	TRAV39;TRAV40;TRAV41	HK1_SE:489	3	1
14	right	22770000	23005000	0.000996747	9.32258e-06	TRAJ22;TRAJ21;TRAJ20;TRAJ19;TRAJ18;TRAJ17;TRAJ16;TRAJ15;TRAJ14;TRAJ13;TRAJ12;TRAJ11;TRAJ10;TRAJ9;TRAJ8;TRAJ7;TRAJ6;TRAJ5;TRAJ4;TRAJ3;TRAJ2;TRAJ1;TRAC	HK1_SE:489	23	1
14	left	27312500	29125000	0.00190073	0.00355167	RP11-384J4.2	HK1_SE:490	1	1
14	left	28777500	29122500	2.80551e-06	2.60212e-06	CTD-2591A6.2	HK1_SE:490	1	1
14	right	29122500	29237500	0.0115426	2.66548e-08	RP11-966I7.1;FOXG1;C14orf23	HK1_SE:490	3	1
14	right	35012500	35887500	0.00177719	6.03315e-09	NFKBIA;DNAJC8P1	HK1_SE:491	2	1
14	left	35342500	35802500	7.55773e-05	7.54171e-05	BAZ1A;RP11-73E17.2	HK1_SE:492	2	1
14	left	37135000	37445000	5.38407e-05	5.78509e-05	RP11-964E11.2;PAX9	HK1_SE:495	2	1
14	left	50367500	50468928	3.43027e-14	3.6571e-14	ARF6;RNU6-189P	HK1_SE:496	2	1
14	left	50422500	50468750	6.4623e-18	5.39696e-18	RP11-58E21.4	HK1_SE:496	1	1
14	right	50422500	50468750	6.4623e-18	5.39696e-18	C14orf182	HK1_SE:496	1	1
14	right	50475833	50566666	1.56707e-06	8.8488e-09	RP11-58E21.5;RP11-58E21.7;C14orf183;Y_RNA	HK1_SE:496;HK1_SE:497	4	2
14	right	51960000	52245000	4.11602e-07	3.80757e-07	OR7E106P;RP11-280K24.4;OR7E159P;RP11-280K24.6	HK1_SE:500;HK1_SE:501	4	2
14	right	52047500	52082500	1.7418e-05	1.48821e-05	RNU6-1033P	HK1_SE:501	1	1
14	left	54309166	54574166	7.54431e-07	7.09813e-07	AL162759.1	HK1_SE:502	1	1
14	left	54307500	54647500	0.000328442	0.000312848	AL162759.1	HK1_SE:503	1	1
14	left	54395000	54635000	1.00816e-06	1.05214e-06	AL138479.3	HK1_SE:503	1	1
14	left	55520000	55570000	1.84796e-05	2.00465e-05	MAPK1IP1L	HK1_SE:504	1	1
14	right	55572500	55657500	0.000837306	0.000888864	DLGAP5;RP11-698F20.3	HK1_SE:504	2	1
14	left	64972500	65180000	3.79764e-06	1.36649e-08	ZBTB25;ZBTB1	HK1_SE:507	2	1
14	left	65007500	65180000	8.2571e-09	1.64114e-06	RP11-973N13.4;RP11-973N13.5;HSPA2;PPP1R36	HK1_SE:507	4	1
14	left	65072500	65172500	0.00172072	9.07266e-05	RP11-973N13.3;RP11-973N13.2	HK1_SE:507	2	1
14	left	65687500	65722500	0.00203694	0.00199217	CTD-2509G16.2;CTD-2509G16.3	HK1_SE:508	2	1
14	left	69085000	69135000	0.000321789	0.000345325	CTD-2325P2.4	HK1_SE:509	1	1
14	right	69407500	69547500	2.54803e-11	1.64114e-06	DDX18P1	HK1_SE:510	1	1
14	left	74037500	74227500	4.83983e-06	4.43263e-06	HEATR4;ACOT2;NT5CP1	HK1_SE:511	3	1
14	right	74225000	74260000	0.000133762	0.0116939	ELMSAN1;RP5-1021I20.1;snoU13	HK1_SE:511	3	1
14	left	74958750	75037500	2.48316e-08	2.66548e-08	NPC2;MIR4709;RAP1AP;ISCA2	HK1_SE:512	4	1
14	right	75075000	75185000	2.33029e-11	2.66638e-11	AREL1;AC007956.1;SNORA7;FCF1	HK1_SE:513	4	1
14	left	75077500	75125833	0.000837306	0.000888864	LTBP2;CTD-2207P18.2	HK1_SE:514	2	1
14	right	75077500	75125833	0.000837306	0.000888864	RP11-173A8.2	HK1_SE:513	1	1
14	right	75418750	75471250	1.73947e-12	1.73866e-12	EIF2B2;RP11-950C14.3	HK1_SE:515	2	1
14	left	77342500	77382500	0.00673353	0.000394918	RP11-488C13.1;RN7SKP17	HK1_SE:516	2	1
14	right	77427500	77537500	1.0135e-15	9.83364e-16	RP11-7F17.3	HK1_SE:516	1	1
14	right	93512500	93797500	0.00164913	0.00157116	BTBD7;UNC79	HK1_SE:519	2	1
14	left	94405000	95065000	2.28837e-07	2.3203e-07	FAM181A-AS1;RP11-131H24.4;MIR4506	HK1_SE:520	3	1
14	right	95062500	96012500	0.000650835	0.00087376	SNHG10;SCARNA13;GLRX5	HK1_SE:520	3	1
14	right	99995000	100042500	3.83573e-06	3.98997e-06	Y_RNA	HK1_SE:521	1	1
14	right	100037500	100562500	0.00224483	0.00281394	MIR151B;MIR342	HK1_SE:521	2	1
14	right	101155000	101535000	0.000284503	0.00026845	MIR382;MIR134;MIR485;MIR323B;MIR154;MIR496;MIR377;MIR541;MIR409;MIR412;MIR369;MIR410;MIR656;MEG9;AL132709.1	HK1_SE:522	15	1
14	left	101155000	101945000	0.000981937	6.52366e-05	RP11-566J3.2	HK1_SE:523	1	1
14	left	101445000	102745000	0.000194886	0.000426345	SNORD114-9;SNORD114-10;RP11-909M7.3;SNORD114-11;SNORD114-12;SNORD114-13;SNORD114-14;SNORD114-15;SNORD114-16;SNORD114-17;SNORD114-18;SNORD114-19;SNORD113;SNORD113;SNORD113;SNORD114-20;SNORD114-21;SNORD114-22;SNORD114-23;SNORD114-24;SNORD114-25;SNORD114-26;SNORD114-27;SNORD114-28;SNORD114-29;SNORD114-30;SNORD114-31	HK1_SE:524	27	1
14	left	102442500	102747500	2.84275e-09	1.26465e-05	DYNC1H1;RP11-1017G21.3	HK1_SE:524	2	1
14	left	103608750	103651250	0.000251627	0.000273007	RP11-736N17.4;RPL21P12	HK1_SE:528	2	1
14	right	103608750	103651250	0.000251627	0.000273007	GCSHP2;LINC00605	HK1_SE:528	2	1
14	right	103652500	103750000	0.00172072	0.0211922	RAP2CP1;RP11-45P15.2	HK1_SE:528	2	1
14	left	103976250	104020625	3.83573e-06	3.98997e-06	CKB	HK1_SE:529	1	1
14	left	104183750	104390000	2.10534e-07	1.25564e-09	XRCC3;AL049840.1;RP11-73M18.9;ZFYVE21;Y_RNA	HK1_SE:530	5	1
14	right	104385625	104454375	1.56707e-06	0.000149481	AL136001.1	HK1_SE:530	1	1
14	left	104587500	105437500	5.92257e-05	0.00452767	MIR203	HK1_SE:533	1	1
14	right	104587500	105437500	5.92257e-05	0.00452767	AHNAK2;C14orf79	HK1_SE:531	2	1
14	left	104582500	105150000	0.000328442	1.9163e-05	MIR203	HK1_SE:532	1	1
14	right	104582500	105150000	0.000328442	1.9163e-05	MIR4710;RP11-982M15.6;INF2;RP11-982M15.5	HK1_SE:531	4	1
14	right	105151250	105218750	5.01521e-18	5.4049e-18	SIVA1	HK1_SE:532	1	1
14	left	105155000	105437500	3.35658e-05	0.000290788	MIR4710;RP11-982M15.6;INF2;RP11-982M15.5	HK1_SE:533	4	1
14	right	105155000	105437500	3.35658e-05	0.000290788	AHNAK2;C14orf79	HK1_SE:532	2	1
14	left	105217500	105957500	2.81287e-07	2.45665e-07	SIVA1	HK1_SE:535	1	1
14	right	105445000	105765000	4.14731e-07	5.26111e-05	PACS2	HK1_SE:533	1	1
14	right	105437500	105640000	3.75656e-17	3.50333e-14	JAG2;RP11-44N21.4;NUDT14	HK1_SE:533	3	1
14	right	105442500	105497261	0	0	CDCA4	HK1_SE:533	1	1
14	left	105490000	105957500	0.000840034	0.000770561	CDCA4	HK1_SE:535	1	1
14	left	105837500	105955000	1.46662e-16	1.6733e-20	RPS20P33	HK1_SE:535	1	1
14	left	105887500	105950000	4.73657e-10	4.5102e-10	RP11-521B24.3;MTA1	HK1_SE:535	2	1
14	left	105897500	105932500	0.00190502	0.00191662	RP11-521B24.3;MTA1	HK1_SE:535	2	1
20	right	342500	387500	6.92731e-05	7.43645e-05	RBCK1	HK1_SE:643	1	1
20	right	336500	450500	4.99832e-08	2.60856e-06	TBC1D20	HK1_SE:643	1	1
20	right	3765000	3995000	3.25575e-05	0.000883286	RNF24;FTLP3	HK1_SE:644	2	1
20	right	3770833	3875833	0.000543794	0.000569427	RP11-119B16.2;PANK2	HK1_SE:644	2	1
20	left	5590833	5634166	1.21592e-05	0.000394918	GPCPD1	HK1_SE:646	1	1
20	left	19795000	19965000	9.59212e-15	1.62791e-07	RPL12L3	HK1_SE:647	1	1
20	left	19872500	19968750	2.62077e-10	3.85464e-13	RIN2	HK1_SE:647	1	1
20	right	22362500	23337500	7.76481e-11	2.66258e-07	RP3-322G13.7;AL096677.1;NXT1;RP3-322G13.5;GZF1	HK1_SE:648	5	1
20	right	22365000	22565000	4.88094e-11	3.50901e-05	LINC00261;FOXA2	HK1_SE:648	2	1
20	right	23135000	23565000	1.82068e-05	0.00042092	RP11-218C14.2	HK1_SE:649	1	1
20	left	30150833	30307500	8.7073e-05	2.60856e-06	HM13-IT1;HM13-AS1	HK1_SE:653	2	1
20	right	30150833	30307500	8.7073e-05	2.60856e-06	BCL2L1;AL160175.1	HK1_SE:652	2	1
20	right	30151590	30196590	1.4034e-41	1.3677e-41	ID1;MIR3193	HK1_SE:652	2	1
20	left	30192500	30302500	1.47558e-08	0.000107722	ID1;MIR3193	HK1_SE:653	2	1
20	right	32957500	33037500	0.000477668	0.000480229	ITCH-AS1;ITCH-IT1	HK1_SE:654;HK1_SE:655	2	2
20	right	33007000	33067000	5.05629e-07	5.71127e-07	MIR644A;FDX1P1	HK1_SE:655	2	1
20	left	33891250	33935000	1.86106e-08	2.04572e-08	FAM83C	HK1_SE:656	1	1
20	right	33895000	34205000	0.00355792	0.00363907	FER1L4;SPAG4	HK1_SE:656	2	1
20	left	35918125	35992812	4.37198e-39	2.34585e-31	MANBAL	HK1_SE:658	1	1
20	right	43674500	43724500	6.26783e-13	6.73527e-13	KCNS1	HK1_SE:660	1	1
20	right	43675000	44412500	0.00104779	3.02168e-06	WFDC3;RNU6ATAC38P;DNTTIP1	HK1_SE:660	3	1
20	left	49052500	49112500	6.92731e-05	7.43645e-05	RN7SL636P	HK1_SE:663	1	1
20	right	49052500	49112500	6.92731e-05	7.43645e-05	PTPN1	HK1_SE:662	1	1
20	left	52483750	52526250	0.000305398	0.000294535	SUMO1P1	HK1_SE:664	1	1
20	right	52745000	55205000	6.35561e-06	8.22708e-07	TFAP2C	HK1_SE:665	1	1
20	right	52750000	55362500	4.62242e-05	0.00242965	RNU6-929P	HK1_SE:665	1	1
20	left	60697500	60737500	5.87604e-06	5.52317e-06	LSM14B	HK1_SE:666	1	1
20	left	60725000	60942500	0.00221918	0.0105592	PSMA7;SS18L1	HK1_SE:667	2	1
20	right	60725000	60942500	0.00221918	0.0105592	LAMA5;RP11-157P1.5	HK1_SE:666	2	1
20	left	60815000	60955000	5.91931e-09	0.000119277	OSBPL2	HK1_SE:667	1	1
17	right	825000	880000	1.03124e-25	3.10172e-17	NXN;AC015884.1	HK1_SE:580	2	1
17	left	1587500	1672500	1.27911e-09	0.000480229	PRPF8	HK1_SE:581	1	1
17	left	1621666	1683333	9.34653e-15	2.14714e-11	TLCD2;MIR22HG;WDR81	HK1_SE:581	3	1
17	left	4110000	4315000	6.11173e-12	1.20577e-09	Y_RNA	HK1_SE:583	1	1
17	left	4615000	4755000	1.07019e-08	2.5893e-05	PELP1;RP11-314A20.2;RP11-314A20.1;ARRB2	HK1_SE:584	4	1
17	left	4692500	4752500	9.19196e-06	0.000571758	VMO1;GLTPD2;PSMB6	HK1_SE:584	3	1
17	left	4715000	4775000	3.08455e-07	3.28059e-07	RP11-81A22.5;PLD2	HK1_SE:584	2	1
17	right	4752500	4842500	7.55773e-05	0.00133372	GP1BA;SLC25A11;RNF167;PFN1;ENO3	HK1_SE:584	5	1
17	left	5686666	5734166	2.0493e-11	2.14714e-11	WSCD1	HK1_SE:585	1	1
17	left	14737500	15562500	3.93158e-13	2.49824e-06	AC005863.2	HK1_SE:587	1	1
17	right	14737500	15562500	3.93158e-13	2.49824e-06	RP11-385D13.1;RP11-640I15.1	HK1_SE:586	2	1
17	left	14737500	15862500	1.26446e-05	3.38131e-05	AC005863.2	HK1_SE:589	1	1
17	right	14737500	15862500	1.26446e-05	3.38131e-05	ADORA2B	HK1_SE:586	1	1
17	right	15812500	16187500	1.5482e-05	1.58751e-05	MIR1288	HK1_SE:588	1	1
17	right	15820833	15859166	3.74169e-05	3.6184e-05	ADORA2B	HK1_SE:588	1	1
17	right	15857500	15902500	9.06847e-09	8.56317e-09	ZSWIM7;TTC19	HK1_SE:589	2	1
17	right	16910000	16947500	0.00367096	0.000107722	MPRIP	HK1_SE:591	1	1
17	right	17585000	17675000	1.32425e-05	4.9366e-09	RAI1-AS1;SMCR5;RP1-253P7.1	HK1_SE:592	3	1
17	right	17582500	17747500	8.2875e-07	7.94644e-07	SREBF1;AC122129.1	HK1_SE:592	2	1
17	left	17597500	17652500	2.13594e-05	2.20414e-05	RAI1	HK1_SE:592	1	1
17	left	17742500	17817500	0.00016076	4.44343e-06	SREBF1	HK1_SE:593	1	1
17	right	17852500	17937500	1.47558e-08	1.75779e-06	ATPAF2;GID4	HK1_SE:593	2	1
17	right	17872500	17930833	2.10534e-07	2.27903e-07	ATPAF2;GID4	HK1_SE:593	2	1
17	right	27477500	27620000	0.000106711	4.98605e-06	NUFIP2	HK1_SE:595	1	1
17	right	35207500	35307500	3.0748e-13	2.84242e-17	RP11-445F12.1;LHX1;RP11-445F12.2;AATF	HK1_SE:596	4	1
17	left	38462500	39837500	0.000777531	2.85691e-05	CTD-2267D19.6;RARA	HK1_SE:600	2	1
17	left	38687500	39812500	0.00783052	5.9368e-05	RP5-1028K7.2	HK1_SE:600	1	1
17	left	39012500	39062500	0.020929	0.0211922	RP5-1110E20.1;KRT12	HK1_SE:599	2	1
17	right	39065000	39705000	4.82989e-09	1.49388e-06	LINC00974	HK1_SE:599	1	1
17	right	39070000	39562500	2.10182e-05	1.9163e-05	KRT31;AC003958.2;KRT41P	HK1_SE:599	3	1
17	right	39072500	39292500	0.000220834	0.000230206	KRTAP4-12;KRTAP4-6;KRTAP4-5	HK1_SE:599	3	1
17	right	39067500	39480000	3.33902e-05	0.000572385	KRTAP16-1;KRTAP17-1;TBC1D3P7;AC003958.6	HK1_SE:599	4	1
17	left	39711250	39808750	1.60715e-23	1.65258e-32	LINC00974	HK1_SE:600	1	1
17	left	39733055	39804444	5.96097e-16	2.1444e-12	KRT9;KRT14	HK1_SE:600	2	1
17	right	39847500	39950000	0.0125576	0.00146843	JUP	HK1_SE:600	1	1
17	left	42987500	43212500	0.000463496	3.4774e-09	EFTUD2;CCDC103;FAM187A;AC015936.3;GFAP	HK1_SE:602	5	1
17	left	43132500	43172500	0.00203694	4.93114e-05	DCAKD;NMT1	HK1_SE:602	2	1
17	left	43137500	43205000	0.000543794	0.000569427	DCAKD;NMT1;Y_RNA	HK1_SE:602	3	1
17	left	43212500	43462500	5.20391e-08	1.5671e-09	PLCD3;ACBD4;HEXIM1	HK1_SE:604	3	1
17	right	43212500	43462500	5.20391e-08	1.5671e-09	CTB-39G8.2;CTB-39G8.3	HK1_SE:602	2	1
17	right	43218333	43395000	5.33088e-06	5.07153e-06	MAP3K14;RNA5SP443	HK1_SE:602	2	1
17	left	43297500	43462500	2.57999e-11	2.62391e-09	CTD-2020K17.1;FMNL1	HK1_SE:604	2	1
17	left	43386666	43452083	1.08545e-24	1.85111e-19	MAP3K14	HK1_SE:604	1	1
17	left	43662500	44812500	1.78716e-15	3.23231e-09	DND1P1	HK1_SE:605	1	1
17	right	48130000	48715000	0.0144236	0.0772439	CTB-22K21.2;ABCC3	HK1_SE:608	2	1
17	right	48132500	48227500	2.25631e-14	2.43564e-11	PPP1R9B;AC002401.1;RP11-893F2.13;SGCA	HK1_SE:608	4	1
17	left	73665000	73715000	4.29484e-08	4.86949e-08	RECQL5;SAP30BP;RP11-474I11.8	HK1_SE:614	3	1
17	right	73665000	73715000	4.29484e-08	4.86949e-08	ITGB4	HK1_SE:614	1	1
17	right	73675000	73855000	5.97259e-05	0.00248955	UNC13D;WBP2	HK1_SE:614	2	1
17	right	73671388	73728611	7.79472e-34	6.05748e-26	ITGB4	HK1_SE:614	1	1
17	left	75462500	76337500	0.00190073	0.00355167	RP11-75C10.7;RP11-75C10.9	HK1_SE:615	2	1
17	right	76296666	76349166	2.48316e-08	2.66548e-08	SOCS3;RP11-806H10.4	HK1_SE:615	2	1
17	right	76297500	76407500	0.000543794	0.00740321	SNORA30;AC061992.1	HK1_SE:615	2	1
17	left	78137500	78837500	5.92257e-05	9.46834e-05	CARD14	HK1_SE:618	1	1
17	left	78767500	78802500	3.74169e-05	3.6184e-05	RP11-28G8.1	HK1_SE:617	1	1
17	right	79010833	79202500	1.48317e-06	0.000141293	AZI1;ENTHD2;AC027601.1;C17orf89	HK1_SE:619	4	1
17	right	79015000	79485000	0.00269542	0.000230095	ACTG1;AC139149.1;RP13-766D20.1;RP13-766D20.2;FSCN2	HK1_SE:619	5	1
17	left	79014500	79074500	3.26294e-14	3.16322e-14	BAIAP2-AS1;BAIAP2	HK1_SE:620	2	1
17	left	79855000	80245000	0.00711511	0.0007726	ALYREF;ANAPC11;NPB;PCYT2	HK1_SE:622	4	1
17	left	80172500	80252500	0.00172072	0.00183873	CCDC57;RP13-516M14.2;SLC16A3	HK1_SE:622	3	1
5	right	16915000	17375000	5.11039e-05	6.10143e-05	CTD-2139B15.5;CTD-2139B15.4	HK1_SE:195	2	1
5	right	36462500	36497500	3.32465e-05	0.000868542	RNA5SP181	HK1_SE:196	1	1
5	left	42907500	42990000	1.47558e-08	1.48427e-08	CTD-2325A15.3;CTD-2325A15.2;CTD-2201E18.4;CTD-2201E18.2	HK1_SE:197	4	1
5	right	43007500	43042500	2.14326e-06	2.32365e-06	CTD-2035E11.4;ANXA2R;AC025171.1	HK1_SE:197	3	1
5	right	52337500	52375000	8.6409e-06	0.000230206	CTD-2366F13.2	HK1_SE:199	1	1
5	right	56987500	57762500	5.19489e-06	1.99436e-10	PLK2	HK1_SE:202	1	1
5	right	57137500	57185833	0.00190502	7.43645e-05	RP11-478P10.1	HK1_SE:203	1	1
5	right	66301666	66505000	2.50392e-05	2.2491e-05	CD180	HK1_SE:204	1	1
5	left	95297500	95592500	1.99973e-07	0.000230206	ELL2;CTD-2337A12.1;FABP5P5	HK1_SE:205	3	1
5	left	134372500	134470000	1.56416e-07	1.22662e-05	PITX1;CTC-349C3.1;CTC-276P9.1	HK1_SE:207	3	1
5	right	141062500	141500000	0.000369432	0.000448985	NDFIP1	HK1_SE:208	1	1
5	left	142557500	142642500	4.37449e-06	4.71409e-06	ARHGAP26-IT1	HK1_SE:209	1	1
5	left	148215000	148290000	1.37455e-13	1.48568e-13	ADRB2	HK1_SE:210	1	1
5	right	148291590	148361136	0	0	RP11-44B19.1	HK1_SE:210	1	1
5	left	150952500	151030000	9.34653e-15	1.00374e-14	FAT2	HK1_SE:215	1	1
5	right	150952500	151030000	9.34653e-15	1.00374e-14	CTB-113P19.4	HK1_SE:215	1	1
5	right	167154166	167454166	3.72515e-07	0.000886915	SNORA40	HK1_SE:216	1	1
5	left	167715000	167795000	4.00414e-06	4.26441e-06	WWC1	HK1_SE:218	1	1
5	left	167722500	167780000	3.49089e-08	7.98104e-06	WWC1	HK1_SE:218	1	1
7	left	855000	985000	5.30409e-05	5.00013e-05	SUN1	HK1_SE:240	1	1
7	left	917500	982500	1.99973e-07	8.4562e-06	GET4;RP11-449P15.2	HK1_SE:240	2	1
7	left	5462500	6312500	0.00153746	0.00227607	TNRC18;AC093620.5;AC092171.2;RP11-1275H24.2;RP11-1275H24.1;RP11-1275H24.3	HK1_SE:244	6	1
7	left	5465000	5605000	5.42855e-23	2.24823e-16	TNRC18;AC093620.5;AC092171.2;RP11-1275H24.2;RP11-1275H24.1;RP11-1275H24.3	HK1_SE:241	6	1
7	left	5463500	5634500	4.73527e-15	4.47902e-19	TNRC18;AC093620.5;AC092171.2;RP11-1275H24.2;RP11-1275H24.1;RP11-1275H24.3	HK1_SE:242	6	1
7	left	5565000	5600000	1.06475e-07	8.72176e-08	FBXL18;AC006483.1	HK1_SE:241	2	1
7	left	5554500	5637500	4.67282e-19	9.94134e-11	FBXL18;AC006483.1	HK1_SE:242	2	1
7	left	6212500	6358750	4.39435e-09	6.43495e-07	Y_RNA	HK1_SE:244	1	1
7	left	6322500	6422500	0.000220834	0.000230206	CYTH3	HK1_SE:245	1	1
7	right	6322500	6422500	0.000220834	0.000230206	RAC1	HK1_SE:244	1	1
7	left	30202500	30387500	1.87481e-08	1.50328e-06	AC007036.5;RPS27P16	HK1_SE:248	2	1
7	left	30326250	30386250	5.87604e-06	3.64677e-09	ZNRF2;MIR550A1	HK1_SE:248	2	1
7	left	43624166	43682500	0.000589747	9.50985e-06	AC011738.1;STK17A	HK1_SE:250	2	1
7	left	45962500	46232500	2.10534e-07	1.25564e-09	IGFBP3	HK1_SE:251	1	1
7	right	47645000	48125000	1.07266e-08	1.03129e-08	UPP1	HK1_SE:253	1	1
7	left	54830000	55765000	0.000741866	0.00732559	SEC61G;RP11-745C15.2	HK1_SE:257	2	1
7	right	54830000	55765000	0.000741866	0.00732559	RNU6-389P	HK1_SE:254	1	1
7	right	55217000	55263000	1.12881e-07	1.64065e-07	EGFR-AS1	HK1_SE:256	1	1
7	right	55237500	56112500	1.4115e-06	1.34685e-06	PSPH;CCT6A;SNORA22	HK1_SE:256	3	1
7	right	75684166	75932500	9.87889e-06	2.92981e-07	RN7SL212P;HSPB1	HK1_SE:261	2	1
7	right	75695833	75759166	1.61241e-15	1.45557e-15	AC005077.7	HK1_SE:261	1	1
7	right	86945000	87855000	0.0177609	0.000245233	SRI;CTB-167B5.1;AC003991.3	HK1_SE:263	3	1
7	right	92387500	93487500	4.12254e-06	0.000394681	NDUFAF4P2	HK1_SE:264	1	1
7	left	104655000	104865000	4.22807e-06	0.000505776	LINC01004;KMT2E-AS1;KMT2E	HK1_SE:266	3	1
7	left	104825000	104867500	2.50837e-11	2.52284e-11	CTB-152G17.5	HK1_SE:266	1	1
7	right	105707500	105752500	1.459e-16	9.94015e-22	SYPL1;DCAF13P1	HK1_SE:267	2	1
7	left	115855000	116325000	2.3178e-06	0.000502906	TES	HK1_SE:270	1	1
7	right	115896250	116223750	4.89566e-11	2.97162e-09	AC006159.4	HK1_SE:268	1	1
7	right	115899166	115995833	7.27511e-07	1.73557e-09	AC002066.2	HK1_SE:268	1	1
7	right	115995000	116167500	3.74169e-05	2.60004e-07	CAV1	HK1_SE:268	1	1
7	right	115995833	116082500	4.65977e-09	1.58805e-06	snoZ185	HK1_SE:268	1	1
7	right	116037500	116142500	8.37638e-06	7.98104e-06	AC002066.1	HK1_SE:269	1	1
7	right	116034166	116077500	1.68745e-06	1.58805e-06	snoZ185	HK1_SE:269	1	1
7	left	121081250	121178750	4.37449e-06	4.71409e-06	RP11-3L10.3	HK1_SE:271	1	1
7	right	129474166	129589166	0.000305398	3.98997e-06	UBE2H;RP11-306G20.1;Y_RNA;Y_RNA	HK1_SE:272	4	1
7	right	129995000	130535000	0.000284503	0.00026845	AC016831.6;AC016831.7	HK1_SE:274	2	1
7	right	129997500	130082500	6.92731e-05	7.43645e-05	CEP41	HK1_SE:274	1	1
7	left	157112500	158612500	0.00172062	0.00279465	RN7SL142P	HK1_SE:277	1	1
7	right	157112500	158612500	0.00172062	0.00279465	ESYT2	HK1_SE:276	1	1
7	left	158497500	158617500	1.13048e-25	1.05461e-25	NCAPG2;AC019084.7	HK1_SE:277	2	1
7	right	158612500	158655000	0.00190502	0.00191662	WDR60	HK1_SE:277	1	1
18	left	3015000	3605000	5.11039e-05	0.0007726	LPIN2;SNORA70	HK1_SE:623	2	1
18	left	3276071	3594642	0.000305398	2.66548e-08	RP13-270P17.1;MYL12B;RP11-838N2.5	HK1_SE:623	3	1
18	left	3454000	3594500	1.459e-16	9.94015e-22	RP11-838N2.4	HK1_SE:623	1	1
18	left	20012500	20047500	0.00190502	0.00191662	CTAGE1;RP11-863N1.4	HK1_SE:627	2	1
9	right	687500	3512500	2.5616e-05	3.69264e-05	RFX3;RP11-509J21.1	HK1_SE:315	2	1
9	left	3877500	4137500	7.5347e-06	7.73116e-05	RP11-252M18.3	HK1_SE:316	1	1
9	right	4137500	5437500	4.52121e-05	0.00294999	PLGRKT;CD274	HK1_SE:316	2	1
9	right	4135000	4345000	0.000131781	0.000119277	GLIS3	HK1_SE:316	1	1
9	left	14207500	14277500	4.85931e-05	4.93114e-05	RP11-280O24.3	HK1_SE:318	1	1
9	right	14214500	14316500	9.19196e-06	9.50985e-06	RP11-120J1.1	HK1_SE:317	1	1
9	left	21555000	21685000	0	0	MIR31HG	HK1_SE:320	1	1
9	right	21585000	21995000	2.48815e-09	2.54295e-07	CDKN2A;CDKN2B-AS1;RP11-149I2.4;CDKN2B	HK1_SE:319	4	1
9	right	21592500	21792500	8.2875e-07	7.94644e-07	MTAP;RP11-145E5.5	HK1_SE:319	2	1
9	right	21574891	21682717	2.754e-42	2.682e-42	KHSRPP1	HK1_SE:319	1	1
9	right	21682500	21990833	0.00752639	0.00758585	CDKN2A;CDKN2B-AS1;RP11-149I2.4	HK1_SE:320	3	1
9	right	21827500	21872500	7.72751e-07	2.49229e-10	RP11-70L8.4	HK1_SE:321	1	1
9	right	95887500	96337500	8.81745e-12	8.297e-12	AL353629.1;PHF2	HK1_SE:329	2	1
9	left	97560833	97630833	9.19196e-06	0.000571758	MIR2278	HK1_SE:330	1	1
9	left	99187500	101012500	0.000189999	0.000518508	ZNF367	HK1_SE:331	1	1
9	left	100747500	101015000	0.00608815	3.14579e-05	ANP32B;RP11-535C21.3	HK1_SE:331	2	1
9	left	100817500	101017500	0.000366955	0.000394918	NANS	HK1_SE:331	1	1
9	left	100967500	101015833	2.02113e-12	2.1444e-12	CORO2A	HK1_SE:331	1	1
9	right	100967500	101015833	2.02113e-12	2.1444e-12	TBC1D2	HK1_SE:331	1	1
9	left	110252500	110515000	7.53704e-05	4.43263e-06	KLF4	HK1_SE:332	1	1
9	left	112787500	113737500	0.000117079	0.000216004	RP11-151F5.2	HK1_SE:334	1	1
9	right	113509166	113675833	6.92731e-05	7.43645e-05	RNU6-432P	HK1_SE:333	1	1
9	left	114362500	114832500	0.000840034	0.000770561	PTGR1	HK1_SE:335	1	1
9	left	114792500	114830000	0.000966918	0.017896	RP11-4O1.2	HK1_SE:335	1	1
9	left	124324166	124725833	0.000310193	0.002365	DAB2IP;RP11-524G24.2	HK1_SE:338	2	1
9	left	127535000	127585000	1.33081e-26	1.41729e-26	NR6A1;RP11-175D17.3;OLFML2A	HK1_SE:340	3	1
9	right	127587500	129562500	9.16502e-07	0.000116001	ZBTB43	HK1_SE:340	1	1
9	right	131652500	131692500	4.03388e-09	3.86431e-09	PHYHD1;RP11-101E3.5	HK1_SE:341;HK1_SE:342	2	2
9	right	131662500	132250000	0.00172062	0.0512767	AL353803.1;RP11-65J3.14;LINC00963;RP11-492E3.51	HK1_SE:341;HK1_SE:342;HK1_SE:343	4	3
9	right	131902500	132252500	0.000106711	0.000100568	AL353803.1;RP11-65J3.14;LINC00963;RP11-492E3.51	HK1_SE:344	4	1
9	left	132125000	132245000	6.7944e-08	6.24869e-08	RN7SL159P	HK1_SE:346	1	1
9	right	136743750	136851250	1.36818e-26	1.30547e-26	VAV2	HK1_SE:348	1	1
9	left	140447500	140505000	1.01175e-13	9.60747e-14	PNPLA7;AL365502.1;MRPL41	HK1_SE:350	3	1

## Sheet: Static_SE
chr1	gene_anchor_position	centroid1	centroid2	fdrBL	fdrDonut	genes	enhancers	number_genes	number_enhancers
22	right	19961000	20105000	1.20254e-07	7.06266e-16	AC006547.8;TRMT2A;RANBP1;SNORA77;ZDHHC8	HK1_SE:680	5	1
22	right	19960555	20007500	8.19966e-25	8.22585e-25	ARVCF;TANGO2;MIR185	HK1_SE:680	3	1
22	left	20850000	20887500	8.53371e-07	8.23231e-07	KLHL22;Y_RNA;RN7SL812P;KRT18P5;AC007731.1;MED15	HK1_SE:681	6	1
22	left	21267500	21310833	7.3343e-38	1.33743e-37	CRKL	HK1_SE:682	1	1
22	left	22067500	41632500	3.23896e-10	2.76584e-10	RN7SL280P	HK1_SE:690	1	1
22	right	24591875	24639375	0	0	GGT5;AP000354.4;POM121L9P	HK1_SE:683	3	1
22	left	25292500	25387500	0.00397633	0.00409724	SNORD56	HK1_SE:684	1	1
22	right	25337500	25587500	1.20444e-14	3.34735e-08	CTA-221G9.10;CRYBB3	HK1_SE:684	2	1
22	left	25350000	25387500	7.56498e-18	6.85474e-18	TMEM211;KIAA1671	HK1_SE:684	2	1
22	left	30017500	30592500	3.64008e-06	3.44451e-06	RPEP4	HK1_SE:685	1	1
22	left	30600357	30643928	4.02259e-09	2.63779e-12	RP3-438O4.4	HK1_SE:685	1	1
22	right	30600357	30643928	4.02259e-09	2.63779e-12	RP1-102K2.6;LIF;RP1-102K2.8	HK1_SE:685	3	1
22	right	38521111	41571111	0	0	RNU6-375P;RP1-85F18.6	HK1_SE:688	2	1
22	right	38520000	38585000	2.20201e-08	2.31642e-08	MAFF	HK1_SE:688	1	1
22	right	38542500	41592500	4.56501e-05	0.0052681	RP1-85F18.6;RP1-85F18.5;LRRC37A14P;L3MBTL2	HK1_SE:688	4	1
22	right	38522500	38586500	2.18508e-13	2.00525e-13	MAFF	HK1_SE:688	1	1
22	left	41682500	42062500	9.89176e-06	2.28605e-07	RANGAP1;AL035681.1	HK1_SE:692	2	1
22	right	41784166	41849166	4.58598e-35	3.50417e-24	TOB2	HK1_SE:691	1	1
22	left	42020000	42060000	4.22737e-05	2.95567e-09	DESI1;XRCC6	HK1_SE:692	2	1
22	left	43484166	43527500	3.02978e-06	2.70794e-06	TTLL1;AL022237.3	HK1_SE:696	2	1
22	right	43522500	43582500	8.86286e-05	3.51773e-07	TTLL12	HK1_SE:696	1	1
22	right	44730833	45019166	7.66657e-12	1.32055e-09	LINC00229	HK1_SE:697	1	1
22	right	44759500	44841500	1.07697e-17	1.0147e-17	CTA-397C4.2	HK1_SE:697	1	1
22	left	45665000	45947500	0.000127062	5.88907e-06	CTA-268H5.14;CTA-268H5.9	HK1_SE:699	2	1
22	left	45837500	45948750	2.98715e-11	2.91782e-11	RP1-102D24.5	HK1_SE:699	1	1
22	left	45897500	45940000	0.00128431	0.00123541	FBLN1	HK1_SE:699	1	1
22	right	45947500	46372500	9.27123e-11	1.06111e-10	WNT7B;CR536603.1	HK1_SE:699	2	1
22	left	46008750	46078750	4.26951e-08	9.21161e-06	CTA-941F9.9;RNU6-1161P	HK1_SE:701	2	1
22	right	46008750	46078750	4.26951e-08	9.21161e-06	ATXN10	HK1_SE:700	1	1
22	right	46040000	46372500	3.97472e-16	4.65538e-13	WNT7B;CR536603.1	HK1_SE:700	2	1
22	right	46853928	46920000	1.48253e-14	4.12597e-10	CELSR1	HK1_SE:705	1	1
2	left	9145000	9245000	5.63785e-09	5.54059e-09	MBOAT2;HMGB1P25	HK1_SE:61	2	1
2	left	9210833	9250833	6.32064e-08	6.03859e-08	RPL30P3	HK1_SE:61	1	1
2	right	9210833	9250833	6.32064e-08	6.03859e-08	RP11-734K21.2;RP11-734K21.5;RP11-734K21.3	HK1_SE:61	3	1
2	left	9347500	9427500	8.23139e-12	9.90726e-09	ASAP2	HK1_SE:62	1	1
2	left	9695000	9935000	0.0207078	3.87155e-07	ADAM17;RP11-214N9.1	HK1_SE:63	2	1
2	left	9892500	9942500	0.00301009	4.20578e-05	RNU4-73P;RP11-521D12.4	HK1_SE:63	2	1
2	right	9942500	10262500	2.37505e-13	2.05653e-13	RP11-254F7.4;RRM2	HK1_SE:63	2	1
2	right	9940000	10187500	4.83862e-12	1.45717e-09	RP11-254F7.2;KLF11;RP11-254F7.3	HK1_SE:63	3	1
2	right	9942500	9987500	4.89472e-17	4.60388e-17	TAF1B	HK1_SE:63	1	1
2	left	20307500	20382500	3.40402e-17	3.42849e-17	AC098828.2	HK1_SE:65	1	1
2	left	20342500	20385000	1.93995e-06	1.8908e-06	AC098828.3	HK1_SE:65	1	1
2	right	20342500	20385000	1.93995e-06	1.8908e-06	RN7SL140P;RNU6-961P	HK1_SE:65	2	1
2	right	20379500	20425000	6.18253e-17	6.45922e-17	SDC1	HK1_SE:65	1	1
2	right	31607500	31652500	4.37789e-06	0.000570994	XDH	HK1_SE:69	1	1
2	right	36787500	36885000	0.000103138	0.00212191	FEZ2;RP11-294L11.1	HK1_SE:71	2	1
2	right	43307500	43450000	6.22028e-19	1.18001e-23	ZFP36L2;AC010883.5	HK1_SE:74	2	1
2	left	46292500	46395000	0.00218701	0.0022175	AC017006.2	HK1_SE:78	1	1
2	right	46400000	46532500	4.21426e-12	4.48411e-12	EPAS1	HK1_SE:78	1	1
2	right	47264166	47402500	5.76113e-15	2.70338e-11	RP11-761B3.1;CALM2	HK1_SE:80	2	1
2	left	54787500	54837500	5.66009e-05	5.78822e-05	AC092839.4	HK1_SE:81	1	1
2	left	64561666	65105000	3.57602e-06	5.14597e-08	AC114752.1;AC114752.3;MIR4433;AC114752.2	HK1_SE:86	4	1
2	left	64876875	64977500	8.18251e-24	3.01182e-31	AC007365.3	HK1_SE:84	1	1
2	left	64977500	65092500	2.56451e-08	2.69831e-11	SERTAD2	HK1_SE:86	1	1
2	right	64977500	65092500	2.56451e-08	2.69831e-11	AC007880.1	HK1_SE:84	1	1
2	left	64989166	65065416	1.87123e-14	1.78021e-14	SERTAD2;AC007365.2	HK1_SE:86	2	1
2	right	64989166	65065416	1.87123e-14	1.78021e-14	Y_RNA	HK1_SE:84;HK1_SE:85	1	2
2	right	65545000	65602500	0.00128431	0.00123541	AC012370.2	HK1_SE:87	1	1
2	right	65595000	65655000	1.56631e-16	1.69563e-16	SPRED2;AC074391.1	HK1_SE:88	2	1
2	right	65607000	65659000	1.73187e-15	1.7876e-15	SPRED2;AC074391.1	HK1_SE:88	2	1
2	right	70145000	70525000	1.35628e-06	5.81695e-09	SNRPG;FAM136A;AC022201.5	HK1_SE:89	3	1
2	left	70148055	70367500	0	0	snoU13	HK1_SE:90	1	1
2	left	70175000	70365000	1.0831e-29	2.5331e-10	snoU13;ASPRV1	HK1_SE:90	2	1
2	right	70175000	70365000	1.0831e-29	2.5331e-10	AC016700.5	HK1_SE:89	1	1
2	right	70172500	70312500	2.60193e-11	2.44248e-08	PCBP1-AS1;RN7SL470P;PCBP1;AC016700.2	HK1_SE:89	4	1
2	left	70315714	70363214	0	0	PCBP1-AS1;RN7SL470P;PCBP1;AC016700.2;AC016700.3;AC016700.4	HK1_SE:90	6	1
2	left	70530000	70567500	0.0211135	0.000653641	SNRPG;FAM136A;AC022201.5	HK1_SE:91	3	1
2	left	74967500	75067500	2.58141e-12	2.75622e-06	AC007387.2	HK1_SE:94	1	1
2	left	85150000	85512500	2.5964e-10	5.3901e-17	AC022210.2	HK1_SE:96	1	1
2	right	85150000	85512500	2.5964e-10	5.3901e-17	AC093162.1	HK1_SE:95	1	1
2	left	85294642	85521785	1.64354e-23	1.14939e-23	RP11-60H5.1;AC078974.2	HK1_SE:96	2	1
2	left	85360277	85518055	4.9446e-14	4.35114e-14	TCF7L1	HK1_SE:96	1	1
2	right	113442500	113477500	0.00408224	0.0397146	NT5DC4	HK1_SE:102	1	1
2	left	113549500	113618900	1.07697e-17	1.0147e-17	IL1A	HK1_SE:104	1	1
2	right	113635000	113835000	6.35062e-05	5.88633e-05	IL1F10;RNU6-1180P	HK1_SE:104	2	1
2	right	131562500	131862500	7.61649e-08	6.98573e-08	FAM168B;PLEKHB2	HK1_SE:105	2	1
2	right	131555000	131680000	1.16027e-22	5.50676e-23	SCARNA4	HK1_SE:105	1	1
2	right	159747500	160570000	0.000182588	1.93137e-05	AC009961.3;MARCH7	HK1_SE:108	2	1
2	right	173114166	173305833	2.00311e-14	2.10827e-14	ITGA6;AC078883.4	HK1_SE:113	2	1
2	left	173292500	173327500	2.71454e-07	2.07257e-10	ITGA6;AC078883.4	HK1_SE:114	2	1
2	right	173292500	173327500	2.71454e-07	2.07257e-10	AC078883.3	HK1_SE:114	1	1
2	right	178032500	178130000	5.01971e-24	4.07582e-24	MIR3128;AC079305.10	HK1_SE:116	2	1
2	right	178033409	178078863	0	0	AC079305.8;HNRNPA3;MIR4444-1	HK1_SE:116	3	1
2	left	192035000	192082500	2.10357e-26	1.80297e-26	HMGB1P27	HK1_SE:118	1	1
2	right	192505000	192549166	3.15149e-27	1.16849e-21	NABP1	HK1_SE:119	1	1
2	right	206630500	206751500	1.64354e-23	1.14939e-23	RN7SKP178	HK1_SE:121	1	1
2	left	208028333	208199166	1.42272e-17	1.14689e-17	KLF7;AC007879.1	HK1_SE:123	2	1
2	left	208029166	208097500	6.32172e-13	7.06618e-13	KLF7;AC007879.1	HK1_SE:122	2	1
2	right	219155000	219261250	1.39804e-35	0	SLC11A1;CTDSP1;RP11-378A13.2;MIR26B	HK1_SE:124	4	1
2	right	219167500	219222500	1.75607e-10	1.96656e-08	AC021016.8;AC021016.7;C2orf62;AC021016.6	HK1_SE:124	4	1
2	left	220407500	220552500	9.89176e-06	2.28605e-07	CHPF;TMEM198;RP11-256I23.1;MIR3132	HK1_SE:125	4	1
2	left	220462500	220552500	2.01457e-15	1.8791e-12	RN7SKP213;STK11IP	HK1_SE:125	2	1
2	left	220512500	220558500	4.1101e-09	1.13263e-12	RP11-256I23.3	HK1_SE:125	1	1
2	left	220552500	220587500	2.67512e-05	2.39451e-08	AC009502.1;AC009502.4;RPL23P4	HK1_SE:125	3	1
2	left	224560000	224662500	5.65949e-21	6.14039e-21	AC012512.1	HK1_SE:127	1	1
2	left	231577500	231667500	1.74508e-08	1.744e-08	AC098823.3;CAB39;BANF1P3	HK1_SE:128	3	1
2	right	232477500	232577500	0	0	MGC4771;PTMA	HK1_SE:129	2	1
2	right	232477500	232647500	3.14402e-06	2.95008e-06	PDE6D;COPS7B;RP11-690I21.1	HK1_SE:129	3	1
2	right	232534375	232576250	0	0	MGC4771;PTMA	HK1_SE:130	2	1
2	right	235587500	235862500	3.42373e-09	3.10684e-09	SH3BP4	HK1_SE:132	1	1
2	left	239195000	239345000	3.67624e-14	1.84513e-10	PER2;AC012485.1;AC012485.2	HK1_SE:135	3	1
15	left	33312500	33427500	8.57325e-10	7.21215e-10	HNRNPA1P71	HK1_SE:537	1	1
15	left	42065500	42107500	0	0	RP11-107F6.3;MAPKBP1;AC073657.1	HK1_SE:539	3	1
15	right	42065500	42107500	0	0	RP11-23P13.4;PLA2G4B;JMJD7;JMJD7-PLA2G4B	HK1_SE:539	4	1
15	right	58735000	58812500	1.78507e-29	2.41612e-24	RP11-50C13.2	HK1_SE:541	1	1
15	right	58765000	58812500	2.43935e-10	2.51023e-10	RP11-50C13.2	HK1_SE:541	1	1
15	right	59592500	59662500	5.73943e-09	5.8646e-09	MYO1E;RP11-356M20.3;FAM81A	HK1_SE:542	3	1
15	left	67247500	67350000	2.93681e-07	2.95525e-07	RP11-798K3.3	HK1_SE:543	1	1
15	right	67357500	67442500	7.49841e-07	8.62518e-05	RP11-342M21.2	HK1_SE:543	1	1
15	right	74669500	74913500	5.12408e-17	4.01381e-17	CTD-3154N5.1	HK1_SE:544	1	1
15	right	74676346	74728269	6.02929e-38	5.82744e-38	SEMA7A	HK1_SE:544	1	1
15	right	80880000	80980000	8.71359e-07	8.63147e-07	ABHD17C;RP11-28H5.2	HK1_SE:547	2	1
15	right	80882500	80977500	1.20416e-05	0.000245352	ABHD17C;RP11-28H5.2	HK1_SE:547	2	1
15	left	90703125	90763125	5.08861e-27	4.31492e-27	SEMA4B;RN7SL346P	HK1_SE:548	2	1
15	left	90884166	90941666	9.68876e-06	0.00101332	GABARAPL3;ZNF774	HK1_SE:549	2	1
15	left	99197500	99405000	1.77811e-15	1.4429e-15	RP11-35O15.1;IGF1R	HK1_SE:552	2	1
15	right	101227500	101262500	1.15053e-05	1.17881e-05	RP11-66B24.5	HK1_SE:553	1	1
21	left	28217500	30007500	8.53065e-11	2.04653e-10	ADAMTS1	HK1_SE:669	1	1
21	right	30010000	30112500	0.00713773	3.72198e-05	RNU6-872P	HK1_SE:669	1	1
21	left	39862500	40287500	7.68691e-10	7.57655e-10	SNRPGP13	HK1_SE:675	1	1
21	right	40177500	40507500	2.98586e-05	8.64178e-07	RPL23AP12	HK1_SE:674	1	1
21	right	43052500	43147500	1.07977e-12	9.515e-08	LINC00479;LINC00112;AP001615.9	HK1_SE:677	3	1
21	right	43043500	43193500	1.03094e-28	2.96128e-18	RIPK4	HK1_SE:677	1	1
21	right	43044166	43098611	4.1927e-30	4.82674e-30	LINC00111	HK1_SE:677	1	1
21	left	44582500	44937500	0.00397633	2.25575e-05	AP001631.10;CRYAA	HK1_SE:678	2	1
21	left	44856071	44931071	5.73943e-09	9.07174e-12	SIK1;LINC00319	HK1_SE:678	2	1
12	right	3412500	4125000	7.38386e-06	9.94261e-06	RP11-320N7.2	HK1_SE:428	1	1
12	left	3416944	3565277	6.33322e-37	5.46379e-37	RP5-1063M23.1;RP5-1063M23.2	HK1_SE:429	2	1
12	right	3416944	3565277	6.33322e-37	5.46379e-37	RP11-476M19.3;RP11-476M19.1	HK1_SE:428	2	1
12	left	4142500	4227500	0.000178967	0.000172637	RP11-320N7.2	HK1_SE:430	1	1
12	right	4218750	4378750	5.12641e-19	5.7718e-19	RP11-264F23.3;RP11-264F23.4;CCND2	HK1_SE:430	3	1
12	left	6205000	6385000	2.08962e-33	2.11754e-18	RN7SL69P	HK1_SE:434	1	1
12	right	6205000	6385000	2.08962e-33	2.11754e-18	RP1-96H9.5	HK1_SE:431	1	1
12	right	6287500	6387500	0	0	RP1-96H9.5	HK1_SE:432	1	1
12	left	6318900	6390500	0	0	CD9	HK1_SE:434	1	1
12	right	6318900	6390500	0	0	RP1-96H9.5	HK1_SE:433	1	1
12	right	6396250	6443750	1.89961e-06	7.25778e-10	TNFRSF1A;RN7SL391P	HK1_SE:434	2	1
12	right	6394500	6478500	5.73943e-09	5.8646e-09	SCNN1A;LTBR	HK1_SE:434	2	1
12	right	6441346	6486730	0	0	SCNN1A;LTBR	HK1_SE:435	2	1
12	right	6437500	6577500	5.80658e-08	5.50851e-06	VAMP1;RP1-102E24.6	HK1_SE:435	2	1
12	left	10365000	10525000	3.2022e-05	3.18172e-08	GABARAPL1;RP11-656E20.5;KLRD1	HK1_SE:436	3	1
12	right	10515000	10715000	2.30743e-09	8.57212e-06	SLC25A39P2;RP11-291B21.2	HK1_SE:436	2	1
12	right	10515000	10655000	1.00702e-09	4.63848e-06	EIF2S3L	HK1_SE:436	1	1
12	right	10517500	10767500	1.75607e-10	1.96656e-08	MAGOHB	HK1_SE:436	1	1
12	left	11797500	11885000	4.19333e-15	4.01872e-15	ETV6	HK1_SE:437	1	1
12	left	12962500	13350000	6.38422e-09	0.000257615	DDX47	HK1_SE:439	1	1
12	right	14411250	14518750	6.79457e-26	7.22147e-26	RPL30P11;ATF7IP	HK1_SE:440	2	1
12	right	27677500	27742500	7.40024e-10	6.84525e-10	RP11-709A23.2	HK1_SE:441	1	1
12	right	27695000	27741666	3.01062e-33	1.27469e-23	RP11-709A23.2	HK1_SE:441	1	1
12	right	28182916	28278333	0	0	CCDC91	HK1_SE:442	1	1
12	left	30847500	30947500	8.05505e-12	5.8646e-09	IPO8	HK1_SE:444	1	1
12	left	30901730	30954038	0	0	CAPRIN2;RP11-77I22.2	HK1_SE:444	2	1
12	right	31902500	32267500	0.000182588	0.00125242	RP11-843B15.3;RP11-843B15.2;BICD1	HK1_SE:445	3	1
12	left	46780000	46822500	0.000103138	0.000106027	SLC38A2;RP11-474P2.2;RP11-96H19.1;RP11-474P2.4	HK1_SE:446	4	1
12	left	49758500	49900500	4.26951e-08	4.36244e-08	SPATS2	HK1_SE:449	1	1
12	right	52537500	53387500	0.000208144	7.70971e-07	EIF4B	HK1_SE:450	1	1
12	right	52550000	52675000	2.76474e-12	2.6332e-12	RP11-845M18.7;KRT81	HK1_SE:450	2	1
12	left	52615000	52672500	2.01457e-15	1.8791e-12	C12orf80;LINC00592;METTL7AP1;KRT7	HK1_SE:451	4	1
12	left	52637500	52672500	3.23778e-05	3.51408e-05	METTL7AP1;KRT7;RP3-416H24.1;KRT86	HK1_SE:451	4	1
12	left	64485000	64575000	5.9162e-06	5.65904e-06	RP11-196H14.2	HK1_SE:452	1	1
12	right	65998333	66218333	1.02416e-14	6.46946e-11	RPSAP52;HMGA2	HK1_SE:453	2	1
12	left	75912500	76187500	1.01187e-05	9.76367e-06	KRR1	HK1_SE:455	1	1
12	right	76215000	76420000	2.60091e-11	2.21958e-11	PHLDA1;RP11-290L1.3;RP11-290L1.2	HK1_SE:456	3	1
12	right	76217500	76337500	2.15243e-08	1.77798e-06	RN7SL734P	HK1_SE:456	1	1
12	left	94952500	95015000	1.32395e-11	1.3733e-11	SUCLG2P2;MIR5700	HK1_SE:459	2	1
12	right	95004500	95048500	5.27703e-08	5.51938e-08	TMCC3	HK1_SE:459	1	1
12	left	95504722	95610277	1.30043e-15	1.23787e-15	RP11-129B9.2;RP11-129B9.1	HK1_SE:460	2	1
12	right	96602500	96882500	1.75607e-10	1.96656e-08	RP11-510I5.4;C12orf55	HK1_SE:461	2	1
12	left	106638055	106687500	2.00311e-14	2.10827e-14	RP11-651L5.2	HK1_SE:462	1	1
12	right	120665000	120725000	1.32395e-11	1.3733e-11	NME2P1;RNU4-2;RNU4-1	HK1_SE:465	3	1
12	right	120665000	120702500	0	0	PXN	HK1_SE:465	1	1
12	right	123375000	123575000	1.83336e-06	0.000270987	RP11-197N18.7	HK1_SE:467	1	1
12	left	124871071	125003214	0.000103138	0.000106027	RP11-408I18.9	HK1_SE:469	1	1
12	right	124871071	125003214	0.000103138	0.000106027	RP11-83B20.1	HK1_SE:468	1	1
12	left	125005000	125402500	1.90907e-06	8.5781e-08	RP11-83B20.1	HK1_SE:470	1	1
12	right	125005000	125402500	1.90907e-06	8.5781e-08	UBC;MIR5188	HK1_SE:469	2	1
12	right	125425000	125475000	0.00023462	2.70188e-07	DHX37;BRI3BP	HK1_SE:470	2	1
1	left	950500	1001500	1.02166e-08	8.44875e-12	HES4;RP11-54O7.10;RP11-54O7.11;ISG15;AGRN	HK1_SE:0	5	1
1	right	9935000	9972500	2.93681e-07	2.95525e-07	CTNNBIP1	HK1_SE:2	1	1
1	right	12497500	12670000	2.00311e-14	2.10827e-14	DHRS3;RP11-474O21.5	HK1_SE:3	2	1
1	right	12538500	12671500	4.56565e-25	3.80434e-20	DHRS3;RP11-474O21.5	HK1_SE:4	2	1
1	left	12616250	12673750	9.31365e-18	9.43536e-18	RNU6ATAC18P	HK1_SE:5	1	1
1	right	15670500	15746500	2.19273e-21	1.14305e-16	RP3-467K16.4;EFHD2	HK1_SE:6	2	1
1	left	16404642	16453214	2.93681e-07	2.95525e-07	FAM131C	HK1_SE:9	1	1
1	left	16471666	16511666	6.7743e-41	7.13745e-32	EPHA2;RP11-276H7.2;RP11-276H7.3	HK1_SE:10	3	1
1	right	16471666	16511666	6.7743e-41	7.13745e-32	ARHGEF19-AS1	HK1_SE:9	1	1
1	left	17385000	17565000	5.52974e-09	1.65136e-06	SDHB	HK1_SE:11	1	1
1	left	17453214	17563928	0	0	PADI2	HK1_SE:11	1	1
1	right	17575833	17615833	6.32064e-08	6.03859e-08	MIR3972	HK1_SE:11	1	1
1	left	19237500	19282500	8.20132e-11	7.55353e-11	RP13-279N23.2;ALDH4A1;MIR1290	HK1_SE:12	3	1
1	right	19237500	19282500	8.20132e-11	7.55353e-11	IFFO2	HK1_SE:12	1	1
1	left	23070000	23155000	4.92999e-09	5.24217e-09	AL611946.1	HK1_SE:13	1	1
1	left	26147500	26187500	8.53371e-07	2.08292e-09	RP1-317E23.6;RP1-317E23.3;MTFR1L;AL020996.1;RP1-317E23.7	HK1_SE:14	5	1
1	right	27817500	27927500	4.04723e-10	4.02325e-10	AHDC1	HK1_SE:15	1	1
1	left	36567500	36652500	3.03541e-14	6.62628e-12	ADPRHL2	HK1_SE:18	1	1
1	right	36620000	36687500	1.96493e-12	1.12236e-09	THRAP3	HK1_SE:18	1	1
1	left	36615833	36654166	1.89681e-40	1.43608e-40	TRAPPC3;MAP7D1	HK1_SE:18	2	1
1	right	36615833	36654166	1.89681e-40	1.43608e-40	RN7SL131P	HK1_SE:18	1	1
1	right	41321250	41418437	2.00979e-30	1.44897e-30	RP11-348A7.1;UBE2V1P8	HK1_SE:20	2	1
1	right	43387500	43427500	8.86286e-05	3.51773e-07	SLC2A1;SLC2A1-AS1	HK1_SE:21	2	1
1	right	43407500	43487500	1.90304e-06	0.000127328	RNU6-870P	HK1_SE:21	1	1
1	right	43419166	43487500	9.81198e-10	1.12236e-09	RNU6-870P	HK1_SE:21	1	1
1	right	44236944	44400833	5.42113e-34	4.61414e-34	ARTN;RP11-7O11.3;IPO13	HK1_SE:22	3	1
1	right	44235000	44303750	3.23778e-05	3.51408e-05	SHMT1P1	HK1_SE:22	1	1
1	right	44352500	44397500	1.17891e-12	1.13263e-12	ARTN;RP11-7O11.3	HK1_SE:23	2	1
1	left	94711666	94787083	7.25839e-16	8.00317e-16	RP11-148B18.1	HK1_SE:27	1	1
1	left	95010000	95192500	1.10548e-10	1.10193e-10	F3	HK1_SE:29	1	1
1	left	95094166	95192500	1.66535e-15	1.70158e-15	RP11-86H7.7	HK1_SE:29	1	1
1	left	109640000	109810000	0.000382477	0.000360785	RP5-1065J22.8;TMEM167B;SCARNA2;RP5-1065J22.4	HK1_SE:31	4	1
1	left	109742500	109812500	5.07649e-06	5.50851e-06	RNU7-122P;SARS	HK1_SE:31	2	1
1	right	167137500	167180000	1.13038e-07	1.14587e-07	RP11-277B15.2;RP11-277B15.3;POU2F1	HK1_SE:36	3	1
1	left	167525000	167657500	5.82438e-07	5.15577e-09	CREG1	HK1_SE:37	1	1
1	left	167570000	167657500	4.04723e-10	4.02325e-10	RP3-455J7.3	HK1_SE:37	1	1
1	left	181061250	181111562	1.4602e-41	1.9308e-41	IER5;RP11-309G3.3	HK1_SE:39	2	1
1	right	183119166	183164166	3.17331e-09	2.95567e-09	LAMC2	HK1_SE:40	1	1
1	right	183247500	183442500	9.27123e-11	1.12558e-13	SMG7-AS1;SMG7	HK1_SE:41	2	1
1	left	201367500	201435000	3.90486e-13	3.76837e-13	LAD1	HK1_SE:45	1	1
1	right	201413750	201481250	8.69398e-08	9.515e-08	CSRP1;RP11-134G8.7;RPS10P7;RP11-134G8.6	HK1_SE:45	4	1
1	right	201446250	201482500	4.40375e-05	4.20578e-05	CSRP1;RP11-134G8.7;RPS10P7;RP11-134G8.6	HK1_SE:45	4	1
1	left	205092500	205227500	1.2862e-05	1.88969e-07	RBBP5;RP11-383G10.1	HK1_SE:47	2	1
1	right	208387500	209837500	6.01349e-06	0.000735958	LAMB3;G0S2	HK1_SE:49	2	1
1	right	208373333	208415833	1.7728e-10	1.73358e-10	PLXNA2;RP11-2P2.1	HK1_SE:49	2	1
1	left	236027500	236077500	5.90365e-07	6.15666e-07	MIR1537;RNU5E-2P	HK1_SE:59	2	1
1	left	236027500	236107500	2.74793e-11	1.61027e-08	MIR1537;RNU5E-2P	HK1_SE:59	2	1
1	left	236072500	236107500	2.35869e-08	2.15682e-08	RNU6-968P	HK1_SE:59	1	1
1	right	236072500	236107500	2.35869e-08	2.15682e-08	RP5-940F7.2	HK1_SE:59	1	1
10	right	5586944	5641388	1.4688e-26	4.40821e-21	RP13-463N16.6;RP11-336A10.5	HK1_SE:351	2	1
10	left	33246250	33296250	2.38175e-18	2.42644e-18	AK3P5;RP11-462L8.1	HK1_SE:354	2	1
10	left	47655000	48357500	7.84366e-17	2.14662e-16	ANTXRLP1;RP11-292F22.7;ANTXRL	HK1_SE:360	3	1
10	left	54083928	54203928	0	0	PRKG1-AS1;DKK1	HK1_SE:362	2	1
10	left	54074166	54250833	0	0	PRKG1-AS1;DKK1	HK1_SE:362	2	1
10	left	63660500	63787500	4.12596e-14	3.96999e-14	ARID5B	HK1_SE:363	1	1
10	left	70995000	71075000	0.00168978	4.71581e-06	RP11-227H15.4;HKDC1	HK1_SE:365	2	1
10	right	73530833	73619166	0.000103138	0.000106027	PSAP;RNU7-38P	HK1_SE:366	2	1
10	left	73862500	74087500	1.77652e-13	4.50392e-23	SPOCK2	HK1_SE:368;HK1_SE:369	1	2
10	left	74036666	74085416	2.51093e-38	4.00646e-29	DDIT4;RP11-442H21.2	HK1_SE:368;HK1_SE:369	2	2
10	left	75918500	75986500	6.02612e-10	2.45792e-13	AP3M1;ADK	HK1_SE:370	2	1
10	right	81057500	81100833	0.044586	0.00101332	PPIF	HK1_SE:374	1	1
10	right	81914687	81969375	2.73743e-28	2.28794e-28	ANXA11;LINC00857;RPS12P2	HK1_SE:375	3	1
10	left	99095000	99162500	0.0813323	0.0155065	FRAT2;RP11-452K12.4	HK1_SE:377	2	1
10	left	104262500	104405000	1.404e-25	6.14039e-21	ACTR1A;SUFU	HK1_SE:379	2	1
10	left	104677500	105002500	5.87345e-12	7.14973e-10	RP11-724N1.1;CNNM2	HK1_SE:380	2	1
10	left	104949642	104996785	1.48253e-14	1.52316e-14	NT5C2;MARCKSL1P1	HK1_SE:380	2	1
10	right	104995000	105032500	1.93995e-06	1.8908e-06	INA	HK1_SE:380	1	1
10	left	121359166	121412500	8.12677e-11	8.37864e-11	TIAL1	HK1_SE:386	1	1
10	left	121412500	121447500	1.39369e-08	3.16514e-13	RP11-179H18.5;BAG3	HK1_SE:386	2	1
10	right	121412500	121447500	1.39369e-08	3.16514e-13	RP11-179H18.7	HK1_SE:386	1	1
10	right	122837500	123365000	0.000104043	9.38324e-05	FGFR2;RP11-62L18.3	HK1_SE:387	2	1
10	right	122919166	123344166	2.50556e-05	2.25575e-05	FGFR2	HK1_SE:388	1	1
10	right	134211875	134260625	9.31365e-18	9.43536e-18	RP11-432J24.3;C10orf91	HK1_SE:391	2	1
4	left	11430000	11547500	3.62967e-10	1.29324e-12	HS3ST1;RNA5SP156	HK1_SE:177	2	1
4	right	15878750	15956250	1.72068e-13	5.02342e-16	FGFBP2	HK1_SE:180	1	1
4	right	40982500	41217500	1.07977e-12	1.4429e-15	APBB2	HK1_SE:181	1	1
4	right	57945000	58295000	0.00411328	0.000149471	RP11-319E12.1	HK1_SE:183	1	1
4	right	123678750	123836250	2.94806e-08	1.10193e-10	NUDT6;SPATA5	HK1_SE:188	2	1
4	right	173941250	174176250	1.72068e-13	3.28816e-11	MIR548T	HK1_SE:192	1	1
4	left	177714166	177927500	2.46593e-07	9.41608e-06	VEGFC	HK1_SE:193	1	1
X	left	45375000	45602500	6.33847e-06	1.2939e-08	RP11-245M24.1	HK1_SE:707	1	1
6	left	14272500	14737500	5.80638e-05	0.000405606	RP11-359N11.2	HK1_SE:219	1	1
6	right	14745000	15245000	1.92945e-05	2.12571e-05	RP11-560J1.2;JARID2;JARID2-AS1	HK1_SE:219	3	1
6	right	30712000	30847500	1.4536e-22	1.26669e-22	DDR1-AS1;DDR1;MIR4640	HK1_SE:220	3	1
6	right	30793000	30846500	3.66394e-25	3.15189e-25	RN7SKP186;DDR1-AS1;DDR1;MIR4640	HK1_SE:220	4	1
6	right	30796250	31051250	6.21214e-08	5.77998e-08	RNU6-1133P	HK1_SE:220	1	1
6	left	42067500	42107500	1.87228e-06	0.000172637	RP11-7K24.3	HK1_SE:221	1	1
6	right	43691071	43737500	3.40456e-30	1.50741e-24	VEGFA;RP1-261G23.7	HK1_SE:223	2	1
6	right	56575000	56705000	0.000318256	0.000301221	RP11-472M19.2	HK1_SE:228	1	1
6	right	86114722	86168055	3.17669e-18	2.96128e-18	NT5E	HK1_SE:229	1	1
6	left	106894500	107015500	7.8719e-08	7.14973e-10	RNA5SP211;Y_RNA	HK1_SE:230	2	1
6	left	108884166	109060833	1.16391e-14	2.6301e-18	RP11-697G4.4;FOXO3	HK1_SE:231	2	1
6	left	126185000	126275000	3.66466e-10	3.4993e-10	RN7SKP56	HK1_SE:232	1	1
6	left	138037500	138132500	1.90304e-06	2.07357e-06	RP11-95M15.2;AL357060.1	HK1_SE:233	2	1
6	right	138131875	138186250	9.09264e-13	9.48117e-13	RP11-356I2.4;TNFAIP3	HK1_SE:233	2	1
6	left	143265833	143655833	9.34458e-06	9.38324e-05	HIVEP2;RP11-439L18.2;RP11-439L18.1	HK1_SE:234	3	1
6	left	143382500	143655000	1.48278e-06	1.21233e-06	AIG1	HK1_SE:234	1	1
6	right	150160833	150247500	0.00919709	0.00951147	RAET1G;RP11-244K5.6	HK1_SE:235	2	1
6	left	150187500	150587500	3.24788e-09	8.52245e-06	LRP11;RP11-350J20.12;RP11-244K5.8;CCT7P1	HK1_SE:236	4	1
6	left	158400500	158491500	1.06664e-19	1.02913e-19	SYNJ2	HK1_SE:237	1	1
6	left	170493750	170536250	4.46278e-14	4.98459e-14	RP11-302L19.3	HK1_SE:239	1	1
13	right	40092500	40177500	4.55785e-06	4.61336e-06	LHFP	HK1_SE:472	1	1
13	left	42482500	42620000	9.81198e-10	1.12236e-09	RNU6-74P	HK1_SE:473	1	1
13	left	44729000	44885000	2.17161e-11	2.29875e-11	SMIM2-AS1;SMIM2;SMIM2-IT1	HK1_SE:475	3	1
13	left	44810000	44881250	1.32163e-14	1.27118e-14	RP11-478K15.6	HK1_SE:475	1	1
13	right	44886500	44935500	1.1199e-10	1.19784e-10	SERP2	HK1_SE:475	1	1
13	right	44885000	45010000	2.19273e-21	1.82505e-26	RP11-71C5.2	HK1_SE:475	1	1
13	left	45152500	45285000	0.00713773	0.00752326	TSC22D1	HK1_SE:476	1	1
13	right	45285000	45392500	8.23139e-12	9.90726e-09	LINC00330	HK1_SE:476	1	1
13	right	48733750	48798750	1.95237e-34	2.30939e-34	ITM2B	HK1_SE:477	1	1
13	left	73632500	73995000	1.76904e-06	1.77798e-06	KLF5	HK1_SE:478	1	1
13	right	76265000	76595000	2.1793e-07	1.08318e-05	LINC01034	HK1_SE:479	1	1
13	right	76261666	76448333	1.60329e-10	1.37268e-10	C13orf45;RP11-332E3.2	HK1_SE:479	2	1
13	right	76275000	77475000	8.0187e-18	4.50154e-08	KCTD12;AC000403.1	HK1_SE:479	2	1
13	left	79972500	80060000	1.02166e-08	9.90726e-09	RBM26;RNA5SP33;RBM26-AS1	HK1_SE:481	3	1
13	right	109925000	110437500	0.00828636	0.000165209	IRS2	HK1_SE:485	1	1
13	left	110437500	110665000	0.000384956	0.000361438	IRS2	HK1_SE:486	1	1
13	right	110657500	110747500	0.0276516	0.0291834	RN7SL783P	HK1_SE:486	1	1
13	left	111566500	111615500	1.17891e-12	1.29751e-16	ANKRD10;ANKRD10-IT1	HK1_SE:488	2	1
3	right	5025000	5235000	3.09651e-07	2.81018e-09	AC026202.3;AC026202.1;EDEM1	HK1_SE:136	3	1
3	left	5023333	5065000	7.26398e-31	6.31435e-31	BHLHE40-AS1;BHLHE40	HK1_SE:136	2	1
3	right	27535000	27577500	0.0276516	0.0291834	AC137675.1;Y_RNA	HK1_SE:138	2	1
3	right	57957500	57992500	1.58855e-09	8.16032e-13	FLNB	HK1_SE:140	1	1
3	left	98322500	98712500	1.47864e-09	8.09792e-06	CPOX	HK1_SE:141	1	1
3	left	98538055	98710277	1.51716e-20	1.61011e-24	RNU6-26P	HK1_SE:141	1	1
3	left	112295000	112355000	0.000508931	3.53887e-07	ATG3;SLC35A5	HK1_SE:145	2	1
3	right	112362500	112417500	0.000184904	0.000199221	RP11-572C15.3	HK1_SE:145	1	1
3	left	112364166	112532500	0.00713773	3.72198e-05	CCDC80	HK1_SE:145	1	1
3	right	112364166	112532500	0.00713773	3.72198e-05	RP11-180K7.1	HK1_SE:145	1	1
3	right	112360357	112704642	5.18921e-20	2.91782e-11	CD200R1;RP11-484K9.4;GTPBP8	HK1_SE:145	3	1
3	left	123314166	123452500	2.74793e-11	2.60671e-14	PTPLB;MYLK-AS1	HK1_SE:147	2	1
3	right	123452500	123522500	8.07066e-05	8.6115e-05	SNORA5	HK1_SE:147	1	1
3	left	124782500	124827500	0.0329981	0.0318353	HEG1;RNA5SP137	HK1_SE:148	2	1
3	right	125933214	125999642	5.66009e-05	5.78822e-05	RP11-71E19.1;RP11-71E19.2	HK1_SE:149	2	1
3	right	126470000	126702500	5.40895e-30	5.59287e-30	PLXNA1	HK1_SE:150	1	1
3	right	134040000	134147500	1.45979e-09	0.00123541	HMGB3P13;MIR4788	HK1_SE:152	2	1
3	right	149295500	149373500	2.38175e-18	3.96999e-14	WWTR1-IT1;WWTR1-AS1	HK1_SE:153	2	1
3	right	168825000	169480000	0.0038551	5.88633e-05	TERC;ACTRT3;RP11-816J6.3;MYNN	HK1_SE:156	4	1
3	left	170130833	170529166	2.73915e-28	1.11444e-20	RP11-469J4.3;CLDN11	HK1_SE:158	2	1
3	right	170405000	170460000	8.45849e-08	9.06183e-08	RP11-373E16.4	HK1_SE:157	1	1
3	left	170467857	170522857	6.47568e-18	2.12878e-23	RP11-373E16.4	HK1_SE:158	1	1
3	left	170447500	170523750	1.42825e-39	1.70651e-39	RP11-373E16.4	HK1_SE:158	1	1
3	left	176767500	177077500	6.53061e-08	1.45169e-06	TBL1XR1-AS1	HK1_SE:160	1	1
3	right	177077500	177167500	5.07649e-06	5.50851e-06	LINC00578	HK1_SE:160	1	1
3	left	188346250	188392500	0.000184904	0.000199221	AC063932.1	HK1_SE:165	1	1
3	left	189554166	189655833	7.11435e-10	7.31423e-10	MIR944	HK1_SE:167	1	1
3	right	189731250	189840000	6.32064e-08	2.36088e-05	LEPREL1;RN7SL486P;LEPREL1-AS1	HK1_SE:168	3	1
3	left	190052500	190102500	0.000309907	0.000310912	CLDN1;CLDN16	HK1_SE:169	2	1
3	right	193547500	193797500	6.80073e-28	2.42644e-18	RP11-407B7.1;RP11-135A1.3	HK1_SE:171	2	1
3	right	193545833	193854166	6.00096e-31	3.33002e-25	RP11-135A1.2;HES1;RN7SL215P	HK1_SE:171	3	1
3	left	193548333	193595833	4.25247e-19	3.95875e-19	RP11-528A4.2	HK1_SE:171	1	1
3	left	197025000	197182500	1.5675e-08	1.61027e-08	DLG1;MIR4797;DLG1-AS1	HK1_SE:175	3	1
3	right	197025000	197182500	1.5675e-08	1.61027e-08	AC128709.3;AC128709.4;AC128709.2	HK1_SE:173	3	1
16	left	1662500	1751666	8.05505e-12	9.07174e-12	IFT140;CRAMP1L;LA16c-395F10.1	HK1_SE:554	3	1
16	left	4817500	5000000	1.45979e-09	1.45717e-09	RP11-127I20.7;ZNF500	HK1_SE:555	2	1
16	left	4897500	4996250	1.27727e-21	3.3081e-27	GLYR1;UBN1	HK1_SE:555	2	1
16	right	5002500	5147500	6.33847e-06	2.99438e-07	FAM86A;RP11-10K17.6	HK1_SE:555	2	1
16	left	27279642	27332500	2.863e-42	5.27604e-33	NSMCE1;CTD-3203P2.2	HK1_SE:559	2	1
16	left	68782500	68827857	8.40006e-22	8.25969e-22	CDH1;RNA5SP429	HK1_SE:562	2	1
16	right	68937500	69147500	1.13714e-19	4.07582e-24	HAS3;CHTF8	HK1_SE:563	2	1
16	left	68963269	69023653	1.22972e-22	1.27126e-16	RP11-521L9.2	HK1_SE:564	1	1
16	right	69427500	69599166	4.26951e-08	4.36244e-08	NFAT5;MIR1538	HK1_SE:566	2	1
16	right	70725394	70794078	7.45648e-06	0.00303773	RP11-394B2.6;VAC14-AS1	HK1_SE:567	2	1
16	left	75345277	75413055	0	0	RP11-252K23.1	HK1_SE:569	1	1
16	right	75345277	75413055	0	0	RP11-252K23.2	HK1_SE:568	1	1
16	left	81485000	81527500	4.43543e-11	4.01872e-15	CMIP	HK1_SE:570	1	1
16	left	81479500	81561500	5.33299e-22	5.36434e-22	CMIP	HK1_SE:570	1	1
16	right	82665000	83840000	3.44338e-14	5.81695e-09	RP11-483P21.2;RP11-483P21.3;HSBP1	HK1_SE:572	3	1
16	right	82667500	83437500	6.77874e-08	1.21233e-06	RP11-543N12.1;AC009142.1	HK1_SE:572	2	1
16	left	84960000	85002500	1.87002e-07	1.40068e-05	RP11-254F19.3	HK1_SE:573	1	1
16	right	85022500	85062500	5.75226e-05	5.30035e-05	KIAA0513	HK1_SE:573	1	1
16	right	85030000	85205000	0.00107902	0.00106898	CTC-786C10.1	HK1_SE:573	1	1
16	right	85035000	85645000	0.000852452	3.97025e-05	GSE1	HK1_SE:573	1	1
16	right	85425000	85645000	1.17434e-10	2.5405e-16	GSE1	HK1_SE:574	1	1
16	right	85552500	85645500	8.99422e-23	8.34506e-23	GSE1	HK1_SE:575	1	1
16	right	85590000	85645000	3.80624e-37	4.43206e-37	GSE1	HK1_SE:576	1	1
16	left	87420000	87905000	0.000855634	0.0529985	FBXO31;MAP1LC3B;RP11-178L8.3	HK1_SE:577	3	1
16	right	87812500	87855000	7.02175e-10	7.25778e-10	RP4-536B24.3	HK1_SE:577	1	1
16	right	89390000	89552500	6.1971e-13	6.38795e-13	ANKRD11;SPG7	HK1_SE:579	2	1
16	left	89388750	89431250	0.0133762	0.0132245	AC137932.6	HK1_SE:579	1	1
16	right	89386250	89568750	0.000680207	1.09707e-05	ANKRD11;SPG7;RP11-104N10.1	HK1_SE:579	3	1
11	right	2219166	2319166	3.14402e-06	5.77998e-08	C11orf21;TSPAN32	HK1_SE:393	2	1
11	left	9857500	9922500	2.58141e-12	3.91304e-09	RP11-1H15.2;RNU7-28P	HK1_SE:397	2	1
11	left	10831250	10880000	1.49238e-24	1.32625e-24	EIF4G2;SNORD97;RP11-685M7.3	HK1_SE:398	3	1
11	left	10825833	10954166	9.27123e-11	1.06111e-10	EIF4G2;SNORD97;RP11-685M7.3	HK1_SE:399	3	1
11	left	10886500	10952500	6.02612e-10	5.65391e-10	ZBED5;ZBED5-AS1	HK1_SE:399	2	1
11	left	10882500	10922500	8.36266e-23	8.13381e-23	ZBED5;ZBED5-AS1	HK1_SE:398	2	1
11	right	10882500	10922500	8.36266e-23	8.13381e-23	CTD-2003C8.2	HK1_SE:398	1	1
11	left	12707500	12822500	4.26951e-08	1.06111e-10	TEAD1	HK1_SE:403	1	1
11	right	12697500	12917500	1.76904e-06	1.77798e-06	SCARNA16	HK1_SE:402	1	1
11	right	12822500	12862500	4.37789e-06	4.19824e-06	RP11-47J17.1	HK1_SE:403	1	1
11	left	34112500	35212500	4.86232e-07	0.000106211	NAT10	HK1_SE:407	1	1
11	left	34945000	35175000	2.08747e-08	2.237e-08	APIP;PDHX	HK1_SE:407	2	1
11	left	46142500	46260000	4.04723e-10	9.53728e-13	PHF21A;AC024475.1;RP11-702F3.1	HK1_SE:408	3	1
11	left	57522500	57567500	2.38175e-18	2.42644e-18	C11orf31;RP11-691N7.6;BTBD18;CTNND1	HK1_SE:409	4	1
11	left	61103500	61149500	0	0	DDB1;DAK	HK1_SE:410	2	1
11	right	64037500	64072500	4.37789e-06	4.19824e-06	KCNK4;RP11-783K16.10;Y_RNA;TEX40;ESRRA;TRMT112;PRDX5	HK1_SE:411	7	1
11	left	64547500	64612500	5.1177e-08	4.66589e-08	SF1;AP001462.6;RP11-869B15.1	HK1_SE:413	3	1
11	left	64574166	64610833	1.43671e-07	4.04251e-13	MAP4K2;MEN1	HK1_SE:413	2	1
11	right	64612500	64857500	6.90748e-14	2.07257e-10	CDCA5;ZFPL1;AP003068.6;VPS51	HK1_SE:413	4	1
11	right	64615833	64897500	4.19333e-15	1.51773e-19	ZNHIT2;AP003068.12;FAU;SYVN1;MRPL49	HK1_SE:413	5	1
11	left	65191250	65233750	1.53199e-28	1.28572e-28	NEAT1	HK1_SE:414	1	1
11	right	65232500	65275833	3.11121e-22	2.79108e-22	MALAT1;AP000769.7;AP000769.8	HK1_SE:414	3	1
11	left	66822500	67077500	0.000635345	0.000657251	RHOD	HK1_SE:415	1	1
11	left	68085000	68122500	5.54671e-20	4.04251e-13	LRP5	HK1_SE:416	1	1
11	right	68115000	68227500	9.58621e-10	9.25611e-10	PPP6R3	HK1_SE:416	1	1
11	right	68867500	69487500	2.74011e-15	1.55008e-33	ORAOV1	HK1_SE:417	1	1
11	left	69055000	69167500	1.48151e-14	1.38283e-14	MYEOV	HK1_SE:418	1	1
11	right	69167500	69255000	3.75796e-06	1.77422e-09	AP000439.1;AP000439.2	HK1_SE:418	2	1
11	left	69860500	69913500	0.00016309	0.000142213	RP11-626H12.2	HK1_SE:420	1	1
11	right	69922500	70045833	4.56501e-05	1.46577e-07	ANO1-AS1;FADD;RP11-805J14.5	HK1_SE:420	3	1
11	left	70962500	71004166	4.56766e-25	4.02951e-25	SHANK2	HK1_SE:421	1	1
11	right	72897500	72942500	2.27269e-12	2.54196e-12	P2RY2;RP11-800A3.4	HK1_SE:422	2	1
11	right	86451666	86518333	5.07649e-06	5.8422e-08	AP000654.5	HK1_SE:423	1	1
11	left	101982500	102095000	1.3734e-15	1.31521e-15	RP11-732A21.2;YAP1	HK1_SE:424	2	1
11	left	101982500	102140000	9.59417e-07	8.99342e-07	RP11-732A21.2;YAP1	HK1_SE:424	2	1
11	left	102095000	102137500	3.44446e-12	3.25111e-12	RP11-864G5.3	HK1_SE:424	1	1
11	left	122012500	122065000	5.12066e-06	5.17343e-06	MIRLET7A2;MIR100	HK1_SE:426	2	1
11	left	122020833	122069166	4.26951e-08	1.06111e-10	MIRLET7A2;MIR100	HK1_SE:426	2	1
19	right	1747500	1812500	2.56451e-08	2.44248e-08	ATP8B3;CTB-31O20.3;MIR1909;CTB-31O20.4	HK1_SE:629	4	1
19	left	2022500	2064500	0.00237038	0.0022809	BTBD2;RN7SL226P;AC007136.1	HK1_SE:630	3	1
19	right	2062500	2097500	0.000173139	9.86694e-08	MOB3A;IZUMO4	HK1_SE:630	2	1
19	left	2480000	2535000	3.92793e-32	3.89904e-32	GADD45B	HK1_SE:631	1	1
19	right	2535000	2625000	0.00064806	0.000654998	CTC-265F19.2;CTC-265F19.3	HK1_SE:631	2	1
19	left	3562500	4062500	2.58455e-07	2.95455e-07	MFSD12;AC005786.5;AC005786.3;HMG20B	HK1_SE:632	4	1
19	left	3995000	4065000	1.20254e-07	1.91225e-11	EEF2;SNORD37;PIAS4	HK1_SE:632	3	1
19	right	4067500	4182500	9.59417e-07	4.04641e-05	SIRT6;ANKRD24	HK1_SE:632	2	1
19	right	4065500	4126500	0.0137483	0.0138118	MAP2K2	HK1_SE:632	1	1
19	left	4367500	4405000	6.02277e-24	5.25296e-24	AC007292.4;AC007292.3;AC007292.6	HK1_SE:633	3	1
19	right	4367500	4405000	6.02277e-24	5.25296e-24	SH3GL1;CHAF1A	HK1_SE:633	2	1
19	right	4402500	4465000	1.13038e-07	1.14587e-07	UBXN6;CTB-50L17.9;CTB-50L17.16;RN7SL528P;HDGFRP2;AC011498.1	HK1_SE:633	6	1
19	left	12895000	13265000	0.0003109	0.000295138	CTD-2659N19.9;MIR5684;JUNB;CTD-2659N19.10	HK1_SE:634	4	1
19	left	13227500	13267500	1.995e-25	2.31218e-25	LYL1;TRMT1;NACC1;AC005546.2	HK1_SE:634	4	1
19	left	13901666	13961250	3.89037e-16	3.75951e-16	AC008686.1;ZSWIM4;CTD-3252C9.2	HK1_SE:635	3	1
19	left	18392500	18497500	3.62967e-10	5.8422e-08	KIAA1683;JUND;MIR3188;RPL39P38	HK1_SE:637	4	1
19	left	18390000	18440625	1.21121e-16	1.14305e-16	KIAA1683;JUND;MIR3188;RPL39P38	HK1_SE:637	4	1
19	right	18455000	18518333	3.53973e-32	0	LRRC25;AC008397.1;SSBP4	HK1_SE:637	3	1
19	right	18458833	18513500	2.21596e-10	2.82832e-07	LRRC25;AC008397.1	HK1_SE:637	2	1
19	left	35612500	35655000	1.5675e-08	4.19824e-06	FXYD3	HK1_SE:638	1	1
19	right	35648500	35741500	1.7305e-16	1.89067e-16	LSR;AC002128.5;AD000684.2	HK1_SE:638	3	1
19	left	39140625	39181875	6.32064e-08	6.03859e-08	ACTN4	HK1_SE:640	1	1
19	right	45935500	45981000	0	0	ERCC1;FOSB;PPM1N	HK1_SE:641	3	1
19	right	48217500	48252500	1.45979e-09	1.45717e-09	GLTSCR2;SNORD23	HK1_SE:642	2	1
8	left	10547500	10587500	0.00093635	0.0010002	RNA5SP252	HK1_SE:278	1	1
8	right	10547500	10587500	0.00093635	0.0010002	CTD-2135J3.3	HK1_SE:278	1	1
8	right	10587500	10697500	0.00147931	3.12791e-06	SOX7;SOX7;PINX1;RP11-177H2.2	HK1_SE:278	4	1
8	right	17582500	17772500	1.72068e-13	1.30488e-13	FGL1;RP11-156K13.3;PCM1	HK1_SE:280	3	1
8	left	25041250	25120000	1.2862e-05	1.40068e-05	RN7SL651P;DOCK5	HK1_SE:281	2	1
8	right	32087500	32125000	1.07997e-05	1.09707e-05	RNA5SP263	HK1_SE:282	1	1
8	right	48265000	48425000	2.12274e-10	3.87155e-07	RP11-697N18.3;RP11-697N18.4	HK1_SE:284	2	1
8	left	49233750	49617500	7.8719e-08	7.32094e-08	RNU6-295P	HK1_SE:285	1	1
8	left	49427500	49620000	3.14402e-06	2.95008e-06	RP11-567J20.3	HK1_SE:285	1	1
8	left	49543750	49616875	8.53371e-07	8.23231e-07	RP11-567J20.1;RP11-770E5.3	HK1_SE:285	2	1
8	left	53375000	53735000	5.74894e-10	7.59257e-08	ST18	HK1_SE:287	1	1
8	right	53647083	53852083	0	0	NPBWR1	HK1_SE:286	1	1
8	left	54437500	54862500	5.08242e-13	9.65168e-09	RP11-400K9.3;RP11-400K9.4;RP11-400K9.1;RP11-400K9.2	HK1_SE:289	4	1
8	left	54797500	54862500	5.25246e-26	6.17988e-26	RP11-1070A24.2;RP11-1070A24.1	HK1_SE:289	2	1
8	right	54857500	55062500	1.50917e-08	1.39548e-08	MRPL15;RNU6ATAC32P	HK1_SE:289	2	1
8	left	62628611	62675833	7.89e-43	5.94e-43	ASPH;MIR4470	HK1_SE:290	2	1
8	left	94855000	94890000	1.27551e-06	0.000436673	RP3-388N13.3;RP3-388N13.2	HK1_SE:293	2	1
8	right	94889166	94937500	2.02708e-18	2.23705e-18	MIR378D2	HK1_SE:293	1	1
8	left	101639500	101685500	0.000351934	0.000340153	KB-1083B1.1	HK1_SE:295	1	1
8	left	101965000	102135000	2.98085e-13	3.37988e-13	YWHAZ;RN7SL685P;Y_RNA	HK1_SE:296	3	1
8	left	102462500	103812500	0.0025499	0.00364102	KB-1930G5.4	HK1_SE:299	1	1
8	right	102462500	103812500	0.0025499	0.00364102	KB-1732A1.1	HK1_SE:297	1	1
8	left	103252500	103825000	3.54283e-18	5.15577e-09	RRM2B;KB-431C1.4;KB-431C1.3	HK1_SE:299	3	1
8	left	103420833	103824166	3.22759e-07	0.00011931	UBR5;KB-1980E6.2;RNU6ATAC8P	HK1_SE:299	3	1
8	left	103665192	103820961	0	0	KLF10	HK1_SE:299	1	1
8	right	103763500	103817500	7.14675e-19	2.31218e-25	KB-1732A1.1	HK1_SE:298	1	1
8	left	124551071	124695714	2.36553e-23	6.93991e-18	FBXO32	HK1_SE:301	1	1
8	right	124714500	124774500	8.20132e-11	2.10827e-14	FAM91A1	HK1_SE:301	1	1
8	left	126446785	126564642	4.89472e-17	4.01303e-23	TRIB1;RN7SL590P	HK1_SE:302	2	1
8	right	126562500	127562500	1.25366e-05	0.00188368	FAM84B;RP11-103H7.5;RP11-89K10.1	HK1_SE:302	3	1
8	right	127458500	127515500	9.68876e-06	9.21161e-06	RP11-103H7.2;RNU6-869P	HK1_SE:303	2	1
8	right	127839166	128750833	4.04723e-10	1.4429e-15	CASC11;MYC	HK1_SE:304	2	1
8	right	128230000	128491250	6.22489e-15	9.07174e-12	CASC8	HK1_SE:305	1	1
8	right	128231250	128748750	6.80073e-28	5.68673e-23	CASC11;MYC	HK1_SE:305	2	1
8	right	128230000	128412500	6.32172e-13	7.06618e-13	POU5F1B	HK1_SE:305	1	1
8	left	128230000	129195000	3.44338e-14	1.54561e-11	RP11-255B23.4;CCAT1	HK1_SE:308	2	1
8	left	128312500	129187500	2.43099e-07	0.000134486	RP11-382A18.3	HK1_SE:308	1	1
8	left	128307500	128682500	2.06405e-20	2.00813e-20	RP11-382A18.3	HK1_SE:306	1	1
8	left	128412500	128677500	5.80658e-08	5.8422e-08	POU5F1B	HK1_SE:306	1	1
8	left	128492500	128677500	7.11435e-10	7.31423e-10	CASC8	HK1_SE:306	1	1
8	right	128682500	128747500	3.94794e-10	3.45013e-16	CASC11;MYC	HK1_SE:306	2	1
8	left	128812500	128864166	1.07364e-08	9.92438e-09	PVT1	HK1_SE:307	1	1
8	left	130835000	131025000	2.92322e-05	2.82597e-05	RP11-473O4.5	HK1_SE:309	1	1
8	left	130958928	131016071	8.12677e-11	8.37864e-11	RP11-473O4.3	HK1_SE:309	1	1
8	left	141955000	142085000	0.000321698	1.80632e-07	RNA5SP278	HK1_SE:313	1	1
8	left	142011875	142065000	7.27759e-11	6.54397e-11	PTK2	HK1_SE:312	1	1
8	right	142011875	142065000	7.27759e-11	6.54397e-11	RP11-128L5.1	HK1_SE:312	1	1
8	left	142017500	142160000	5.6689e-08	5.97145e-08	PTK2	HK1_SE:314	1	1
8	right	142087500	142137500	1.93995e-06	1.8908e-06	DENND3;RP11-809O17.1	HK1_SE:313	2	1
14	right	22780000	22940000	0.00397633	0.000361438	AE000661.37;TRDJ2;TRDJ3;TRDC;TRDV3;TRAJ61;TRAJ60;TRAJ59;TRAJ58;TRAJ57;TRAJ56;TRAJ55;TRAJ54;TRAJ53	HK1_SE:489	14	1
14	left	35762500	35802500	2.77985e-12	2.49675e-12	PSMA6;AL121594.1	HK1_SE:492	2	1
14	right	35802500	35840000	0.000101277	9.24691e-05	RP11-561B11.3	HK1_SE:492	1	1
14	right	35803500	35870500	2.46472e-25	2.53026e-25	RP11-561B11.1;NFKBIA	HK1_SE:492	2	1
14	left	37134166	37414166	1.36558e-17	1.27899e-17	RP11-964E11.2;PAX9	HK1_SE:494	2	1
14	right	37134166	37414166	1.36558e-17	1.27899e-17	MIR4503	HK1_SE:493	1	1
14	left	37412500	37452500	0.000309907	1.8908e-06	MIR4503	HK1_SE:495	1	1
14	left	50370227	50423409	8.92443e-14	8.13039e-14	ARF6;RNU6-189P	HK1_SE:496	2	1
14	right	50471250	50521250	3.3007e-05	3.01636e-05	RP11-58E21.3;PDLIM1P1;RP11-58E21.1;RN7SKP193	HK1_SE:496	4	1
14	right	51795625	51850000	6.18253e-17	5.09193e-12	RP11-255G12.2;RP11-255G12.3	HK1_SE:498	2	1
14	left	51867500	51909166	7.15992e-15	6.82017e-15	RP11-255G12.3	HK1_SE:500	1	1
14	right	51867500	51909166	7.15992e-15	6.82017e-15	SETP2	HK1_SE:499	1	1
14	left	51861785	51958928	3.41853e-34	3.82139e-34	RP11-255G12.2;RP11-255G12.3	HK1_SE:500;HK1_SE:501	2	2
14	right	51861785	51958928	3.41853e-34	3.82139e-34	FRMD6	HK1_SE:499	1	1
14	left	51910000	51957500	2.19701e-07	1.99808e-07	SETP2	HK1_SE:500;HK1_SE:501	1	2
14	right	51910000	51957500	2.19701e-07	1.99808e-07	FRMD6	HK1_SE:500	1	1
14	left	54392500	54575000	3.14402e-06	2.95008e-06	AL138479.3	HK1_SE:502	1	1
14	left	54425000	54645000	4.45725e-06	4.71581e-06	MIR5580;BMP4	HK1_SE:503	2	1
14	right	69407500	69445000	1.1199e-10	1.19784e-10	ACTN1;ACTN1-AS1	HK1_SE:510	2	1
14	right	74197500	74292500	4.04723e-10	4.02325e-10	RP5-1021I20.2;RP5-1021I20.7	HK1_SE:511	2	1
14	right	74205000	74355000	4.28021e-06	0.00295715	ZNF410	HK1_SE:511	1	1
14	right	74203863	74320681	4.1101e-09	4.24119e-09	RP5-1021I20.7;PTGR2;RP5-1021I20.4;Y_RNA	HK1_SE:511	4	1
14	right	75040833	75084166	1.2702e-11	1.23496e-11	LTBP2;CTD-2207P18.2	HK1_SE:512	2	1
14	right	75084166	75177500	0.000178967	0.000172637	AREL1;AC007956.1;SNORA7;FCF1	HK1_SE:513	4	1
14	right	77382500	77537500	1.20242e-13	2.0671e-09	RP11-7F17.3	HK1_SE:516	1	1
14	right	77379166	77500833	2.65401e-31	5.13079e-17	IRF2BPL;RP11-7F17.5	HK1_SE:516	2	1
14	left	77378928	77422500	5.54671e-20	5.15043e-20	RP11-488C13.4	HK1_SE:516	1	1
14	right	77378928	77422500	5.54671e-20	5.15043e-20	RP11-7F17.7;RN7SL356P;RP11-7F17.1	HK1_SE:516	3	1
14	right	77425000	77787500	0.000313831	0.000290165	POMT2;GSTZ1	HK1_SE:516	2	1
14	right	91422500	91527500	4.37789e-06	4.19824e-06	RPS6KA5;C14orf159	HK1_SE:518	2	1
14	right	91487500	91527500	0.000840749	0.000751861	RPS6KA5;C14orf159	HK1_SE:518	2	1
14	right	93500833	93582500	1.27132e-13	1.22699e-13	ITPK1	HK1_SE:519	1	1
14	left	94802500	95067500	6.33847e-06	8.31134e-05	SERPINA6	HK1_SE:520	1	1
14	right	100037500	100077500	4.76035e-07	4.12631e-07	CCDC85C;RP11-543C4.1	HK1_SE:521	2	1
14	right	101157500	101452500	3.58729e-07	5.53859e-06	SNORD114-14;SNORD114-15;SNORD114-16;SNORD114-17;SNORD114-18;SNORD114-19;SNORD113;SNORD113;SNORD113;SNORD114-20;SNORD114-21;SNORD114-22;SNORD114-23;SNORD114-24;SNORD114-25;SNORD114-26;SNORD114-27;SNORD114-28;SNORD114-29;SNORD114-30;SNORD114-31;SNORD113;SNORD112;SNORD113	HK1_SE:522	24	1
14	left	102437500	102987500	1.16081e-08	1.05012e-08	DYNC1H1;RP11-1017G21.3	HK1_SE:525	2	1
14	right	102740000	102778750	2.07743e-10	1.92439e-10	MOK;ZNF839	HK1_SE:524	2	1
14	right	102747500	102827500	1.90304e-06	2.07357e-06	CINP;snoU13;TECPR2	HK1_SE:524	3	1
14	left	102827500	102992500	1.13038e-07	3.47588e-10	CINP;snoU13;TECPR2	HK1_SE:525	3	1
14	right	102992500	103142500	2.37832e-13	2.45792e-13	RP11-661D19.1	HK1_SE:525	1	1
14	right	102993333	103061666	0	0	RN7SL546P;RCOR1	HK1_SE:525	2	1
14	right	102992500	103242500	0.000127062	0.00167897	RP11-661D19.3;TRAF3;snoU13	HK1_SE:525	3	1
14	right	103468500	103524500	0.000167562	0.000169935	CDC42BPB	HK1_SE:526	1	1
14	left	103572500	103652500	4.46278e-14	8.37864e-11	RP11-736N17.8;EXOC3L4	HK1_SE:528	2	1
14	right	103572500	103652500	4.46278e-14	8.37864e-11	GCSHP2;LINC00605	HK1_SE:527	2	1
14	left	104275227	104375681	3.1604e-37	3.0642e-37	SNORD51	HK1_SE:530	1	1
14	left	104322500	104371250	5.90365e-07	0.000251257	PPP1R13B;LINC00637	HK1_SE:530	2	1
14	left	105218500	105441500	2.20373e-18	1.26669e-22	SIVA1	HK1_SE:533	1	1
14	left	105217500	105555000	0.00397633	0.00409724	SIVA1	HK1_SE:534	1	1
14	left	105271666	105441666	1.10989e-09	1.1771e-09	AKT1;ZBTB42	HK1_SE:533	2	1
14	left	105332500	105442500	0	0	CTD-3051D23.4;CEP170B	HK1_SE:533	2	1
14	left	105396500	105437500	2.14192e-12	2.1131e-17	PLD4	HK1_SE:533	1	1
14	left	105441785	105556071	2.53212e-24	2.4787e-24	AHNAK2;C14orf79	HK1_SE:534	2	1
14	right	105441785	105556071	2.53212e-24	2.4787e-24	RP11-44N21.1	HK1_SE:533	1	1
14	left	105437500	105950000	1.50917e-08	1.39959e-10	AHNAK2;C14orf79	HK1_SE:535	2	1
14	right	105437500	105950000	1.50917e-08	1.39959e-10	RP11-521B24.5;CRIP2;CRIP1;CRIP1;C14orf80	HK1_SE:533	5	1
14	left	105490500	105556500	2.35869e-08	2.5754e-12	CDCA4	HK1_SE:534	1	1
14	right	105557500	105639038	0	0	JAG2;RP11-44N21.4;NUDT14	HK1_SE:534	3	1
14	left	105556666	105951666	2.21393e-19	1.68689e-19	RP11-44N21.1	HK1_SE:535	1	1
14	right	105556666	105951666	2.21393e-19	1.68689e-19	RP11-521B24.5;CRIP2;CRIP1;CRIP1;C14orf80	HK1_SE:534	5	1
14	right	105560000	105767500	5.11314e-09	5.13477e-09	BRF1;PACS2	HK1_SE:534	2	1
14	left	105641666	105951666	1.12214e-08	1.02944e-08	JAG2;RP11-44N21.4;NUDT14	HK1_SE:535	3	1
14	left	105767500	105950000	3.62967e-10	5.8422e-08	BRF1;PACS2	HK1_SE:535	2	1
20	left	3759166	3802500	2.27269e-12	2.08292e-09	C20orf27;SPEF1;CENPB;CDC25B	HK1_SE:644	4	1
20	right	3772500	3832500	4.55785e-06	4.61336e-06	MAVS	HK1_SE:644	1	1
20	left	19672500	19972500	6.53061e-08	5.0759e-08	RP4-718D20.3	HK1_SE:647	1	1
20	left	22321250	22362500	8.95736e-05	7.52745e-07	RP5-1004I9.2	HK1_SE:648	1	1
20	right	22357500	22392500	1.53734e-07	4.6274e-05	RP5-1004I9.1	HK1_SE:648	1	1
20	right	22365000	23135000	1.40032e-08	8.12333e-07	RNA5SP478	HK1_SE:648	1	1
20	left	23030000	23130000	7.02389e-07	7.61385e-07	SSTR4;THBD	HK1_SE:649	2	1
20	right	23135000	23335000	0.0014249	2.3576e-05	RP3-322G13.7;AL096677.1;NXT1;RP3-322G13.5;GZF1	HK1_SE:649	5	1
20	right	24079166	24115833	2.94806e-08	4.61336e-06	RP5-1100I6.1	HK1_SE:650	1	1
20	left	25177500	25222500	4.46278e-14	4.98459e-14	ENTPD6	HK1_SE:651	1	1
20	right	30254772	30313863	9.29073e-36	9.61483e-36	BCL2L1;AL160175.1;TPX2	HK1_SE:653	3	1
20	right	32897500	33292500	2.93197e-10	1.11141e-05	TP53INP2	HK1_SE:654	1	1
20	right	32893333	33107500	5.9562e-28	1.29194e-22	DYNLRB1;Y_RNA	HK1_SE:654	2	1
20	left	32902500	32952500	2.53212e-24	2.4787e-24	AHCY	HK1_SE:654;HK1_SE:655	1	2
20	right	32902500	32952500	2.53212e-24	2.4787e-24	ITCH	HK1_SE:654	1	1
20	left	32900714	32969642	1.414e-42	0	AHCY	HK1_SE:655	1	1
20	right	32900714	32969642	1.414e-42	0	Y_RNA	HK1_SE:654	1	1
20	right	33005000	33045000	1.2862e-05	0.0119343	ITCH-IT1;MIR644A	HK1_SE:655	2	1
20	right	33886666	34035833	3.69424e-20	3.80434e-20	GDF5;MIR1289-1;CEP250	HK1_SE:656	3	1
20	left	34637500	34672500	8.12677e-11	8.37864e-11	LINC00657	HK1_SE:657	1	1
20	right	34637500	34672500	8.12677e-11	8.37864e-11	RP4-550H1.4;HMGB3P2;RP4-550H1.5;EPB41L1	HK1_SE:657	4	1
20	right	39620833	39660833	0.00016309	2.82832e-07	RNU2-52P;TOP1	HK1_SE:659	2	1
20	left	48803000	49076500	0	0	RP11-112L6.4;CEBPB	HK1_SE:663	2	1
20	left	48952500	49067500	1.2862e-05	0.000561352	RP11-290F20.2	HK1_SE:662;HK1_SE:663	1	2
20	right	49120000	49347500	8.79411e-05	0.00153994	PARD6B	HK1_SE:663	1	1
20	right	49116500	49179000	3.3007e-13	4.55204e-09	RN7SL672P;Y_RNA	HK1_SE:663	2	1
20	right	52716973	52812500	7.58367e-33	0	PFDN4	HK1_SE:665	1	1
20	right	60725000	60815000	1.01885e-08	1.08571e-08	OSBPL2	HK1_SE:666	1	1
20	left	60880714	60952142	1.83819e-20	1.68497e-20	ADRM1;RP11-157P1.4	HK1_SE:667	2	1
17	left	778333	831666	1.26646e-13	4.07413e-08	RP11-676J12.6	HK1_SE:580	1	1
17	right	829500	875000	1.99037e-19	2.24714e-19	NXN;RP11-356I18.1;AC015884.1	HK1_SE:580	3	1
17	left	3795833	4052500	0.00064806	0.000654998	CAMKK1	HK1_SE:582	1	1
17	left	4270000	4310000	1.07997e-05	1.09707e-05	UBE2G1;RN7SL774P	HK1_SE:583	2	1
17	right	4325000	4527500	0.00828636	0.00125242	RP11-141J13.5;RNU6-955P	HK1_SE:583	2	1
17	left	14642500	14745000	3.97472e-16	4.65538e-13	AC013248.2	HK1_SE:586	1	1
17	left	15562500	15856250	5.00973e-29	2.58583e-15	RP11-385D13.1;RP11-640I15.1	HK1_SE:589	2	1
17	right	15562500	15856250	5.00973e-29	2.58583e-15	ADORA2B	HK1_SE:587	1	1
17	right	17575000	17937500	3.95965e-18	3.17796e-18	ATPAF2;GID4	HK1_SE:592	2	1
17	right	35212500	35288750	2.19273e-21	1.14305e-16	RP11-445F12.1;LHX1;RP11-445F12.2	HK1_SE:596	3	1
17	left	38975000	39055000	0.000951669	0.000980591	KRT10;TMEM99	HK1_SE:599	2	1
17	right	39075000	39255000	5.84542e-10	5.15881e-10	KRTAP4-7;KRTAP4-8;KRTAP4-16P;KRTAP4-9	HK1_SE:599	4	1
17	right	39072500	39112500	5.19427e-21	4.31492e-27	KRT39	HK1_SE:599	1	1
17	right	39070000	39217500	2.98586e-05	2.91721e-05	KRTAP2-1;KRTAP2-2;KRTAP2-3;KRTAP2-4;KRTAP2-5P	HK1_SE:599	5	1
17	left	39562500	39815000	0.000182588	0.00125242	KRT31;AC003958.2;KRT41P	HK1_SE:600	3	1
17	right	42610833	42712500	3.20167e-11	3.24295e-09	RP11-1072C15.3	HK1_SE:601	1	1
17	right	43170833	43209166	4.40375e-05	2.95525e-07	PLCD3;ACBD4	HK1_SE:602	2	1
17	left	43222500	43275681	0	0	PLCD3;ACBD4;HEXIM1	HK1_SE:603	3	1
17	right	43217500	43322500	5.66009e-05	5.13477e-09	CTD-2020K17.3;CTD-2020K17.4;MAP3K14-AS1	HK1_SE:602	3	1
17	right	46295000	46665000	1.09065e-13	8.83775e-08	HOXB4;MIR10A;HOXB5	HK1_SE:606	3	1
17	left	47492500	47572500	0.000635345	0.000657251	RP11-1079K10.1;PHB;RP11-1079K10.4;Y_RNA;AC004797.1	HK1_SE:607	5	1
17	right	47576666	47629166	2.00311e-14	2.10827e-14	AC006487.1	HK1_SE:607	1	1
17	right	48105000	48225000	8.71438e-06	8.70052e-06	PPP1R9B;AC002401.1;RP11-893F2.13	HK1_SE:608	3	1
17	right	48102500	48141250	5.63712e-37	0	RP11-1094H24.4;ITGA3	HK1_SE:608	2	1
17	right	48982500	49027500	2.60193e-11	2.44248e-08	RP11-700H6.1;RP11-700H6.2	HK1_SE:609	2	1
17	right	57832500	57920833	6.36217e-39	8.39853e-39	MIR21;RNU6-450P	HK1_SE:610	2	1
17	right	57844078	57920394	3.02362e-40	2.48815e-31	MIR21;RNU6-450P	HK1_SE:610	2	1
17	left	69211666	69428333	0.0014249	0.0360043	CASC17	HK1_SE:612	1	1
17	right	73675000	73750000	1.09844e-35	1.00652e-35	GALK1	HK1_SE:614	1	1
17	left	75287500	76337500	0.00016652	0.000266314	RP11-285E9.6;SEPT9	HK1_SE:615	2	1
17	right	76361071	76410357	2.90878e-11	5.51938e-08	SNORA30;AC061992.1	HK1_SE:615	2	1
17	left	78963750	79076250	3.37422e-06	3.12791e-06	RPL12P37;CHMP6;CTD-2561B21.7;AC127496.1	HK1_SE:620	4	1
17	left	79982500	80060000	0.0276516	0.00346865	STRA13;LRRC45;RAC3;DCXR;RP13-650J16.1	HK1_SE:621	5	1
17	right	80065000	80170000	0.000610845	0.000660077	CCDC57;RP13-516M14.2	HK1_SE:621	2	1
17	left	80205000	80255000	1.66112e-05	1.81158e-05	AC132872.1;AC132872.2	HK1_SE:622	2	1
17	right	80250000	80292500	1.15053e-05	2.44248e-08	SECTM1	HK1_SE:622	1	1
5	right	43010000	43065000	8.02288e-05	8.57368e-05	CTD-2201E18.3;CTD-2035E11.5;ZNF131	HK1_SE:197	3	1
5	left	52287500	52330000	6.24426e-19	6.87528e-19	CTD-2175A23.1;ITGA2	HK1_SE:199	2	1
5	right	57135000	57757500	1.72068e-13	1.30488e-13	PLK2	HK1_SE:203	1	1
5	left	95195000	95590000	0.00881447	0.000130132	AC008592.4;AC008592.8;C5orf27;AC008592.5	HK1_SE:205	4	1
5	left	118407500	118602500	1.50917e-08	1.39548e-08	CTB-161M19.4;snoU13	HK1_SE:206	2	1
5	left	118606500	118662500	9.74145e-18	1.09971e-17	AC027320.1;TNFAIP8	HK1_SE:206	2	1
5	right	141067500	141347500	2.15243e-08	1.96656e-08	PCDH12;RNF14;AC005740.5	HK1_SE:208	3	1
5	right	141067500	141257500	8.0205e-10	7.14973e-10	PCDH1	HK1_SE:208	1	1
5	left	142581500	142632500	7.02175e-10	7.25778e-10	ARHGAP26-IT1	HK1_SE:209	1	1
5	left	148212500	148385833	2.65449e-25	4.6593e-17	ADRB2	HK1_SE:211	1	1
5	left	148342500	148382500	7.02175e-10	1.22699e-13	RP11-44B19.1	HK1_SE:211	1	1
5	right	149689500	149737500	7.02175e-10	7.25778e-10	TCOF1	HK1_SE:212	1	1
5	right	149862500	150462500	0.000741543	4.34827e-06	TNIP1	HK1_SE:213;HK1_SE:214	1	2
5	left	150827500	151030000	3.64008e-06	3.78029e-05	SLC36A1	HK1_SE:215	1	1
5	right	150957500	151122500	1.36558e-17	1.27899e-17	CTB-113P19.3	HK1_SE:215	1	1
5	right	151035357	151121785	1.11322e-28	8.59406e-29	CTB-113P19.3	HK1_SE:215	1	1
5	left	167155000	167190000	0.00093635	0.0138118	CTB-78F1.2	HK1_SE:216	1	1
5	left	167157500	167242500	2.94806e-08	3.23728e-08	CTB-78F1.2	HK1_SE:217	1	1
7	left	5532500	5715000	3.04704e-10	4.65538e-13	snoU13;MIR589	HK1_SE:243	2	1
7	left	5541250	5597500	1.07323e-30	1.85648e-38	FBXL18;MIR589	HK1_SE:241	2	1
7	left	5603055	5704722	1.2702e-11	1.96712e-16	ACTB;CTB-161C1.1;AC006483.5	HK1_SE:243	3	1
7	left	5600000	5637500	4.73477e-11	2.03888e-17	ACTB;CTB-161C1.1;AC006483.5	HK1_SE:242	3	1
7	right	5600000	5637500	4.73477e-11	2.03888e-17	FSCN1	HK1_SE:241	1	1
7	left	6302500	6355500	8.54639e-13	2.65439e-08	CYTH3	HK1_SE:244	1	1
7	right	12681250	12721250	5.7167e-08	2.04279e-12	CTD-2320J21.1;ARL4A	HK1_SE:246	2	1
7	right	24865833	24944166	4.40375e-05	4.20578e-05	AC004016.1;AC004016.2	HK1_SE:247	2	1
7	right	24864166	25014722	5.21977e-23	5.68673e-23	OSBPL3	HK1_SE:247	1	1
7	right	47636250	47825000	1.87002e-07	1.40068e-05	C7orf69	HK1_SE:253	1	1
7	right	47640833	47702500	0.012382	0.0119343	C7orf65	HK1_SE:253	1	1
7	right	54835000	55432500	1.07977e-12	9.515e-08	LANCL2	HK1_SE:254	1	1
7	right	54827500	55630000	0.00919709	0.00104905	VOPP1;RP11-310H4.1	HK1_SE:254	2	1
7	right	54837934	55322500	0	0	RP11-339F13.2;CALM1P2	HK1_SE:254	2	1
7	right	54845000	55091250	5.9876e-29	1.36482e-28	EGFR	HK1_SE:254	1	1
7	left	54927500	55087500	7.3805e-34	1.62095e-13	SNORA73	HK1_SE:256	1	1
7	right	86975000	87505000	1.18781e-08	9.58394e-07	SLC25A40;DBF4	HK1_SE:263	2	1
7	right	92386250	92462500	4.1101e-09	4.24119e-09	CDK6;AC002454.1	HK1_SE:264	2	1
7	left	100728500	100772500	5.22589e-12	6.45922e-17	TRIM56;RP11-395B7.7	HK1_SE:265	2	1
7	right	100728500	100772500	5.22589e-12	6.45922e-17	SERPINE1	HK1_SE:265	1	1
7	right	105712500	106412500	0.00308657	1.56463e-05	CTB-111H14.1;RP5-884M6.1;RNA5SP236	HK1_SE:267	3	1
7	right	115902500	116162500	2.74394e-24	5.82744e-38	CAV1	HK1_SE:268	1	1
7	right	115904500	115956500	1.02166e-08	9.90726e-09	AC073130.3	HK1_SE:268	1	1
7	left	115957500	115995000	0.000569246	0.000570994	AC073130.3	HK1_SE:268	1	1
7	left	115997500	116040000	4.43543e-11	4.73353e-11	AC002066.2	HK1_SE:269	1	1
7	left	116315833	116354166	0.000491973	1.31304e-06	MET	HK1_SE:270	1	1
7	left	121028125	121181250	2.55074e-20	4.75823e-16	FAM3C;RP11-3L10.1	HK1_SE:271	2	1
7	left	129422500	129465000	0.000178967	1.90188e-06	MIR182;MIR96;MIR183;RP11-738B7.1	HK1_SE:272	4	1
7	left	129932500	130002500	9.81198e-10	2.95525e-07	CPA4	HK1_SE:274	1	1
7	left	130593750	130641250	1.27551e-06	1.31304e-06	MIR29B1	HK1_SE:275	1	1
18	left	3277500	3670833	1.57753e-37	0	RP11-838N2.5	HK1_SE:625	1	1
18	left	3451666	3667500	4.01414e-21	3.75918e-21	RP11-838N2.4	HK1_SE:625	1	1
18	left	3602857	3658928	8.99422e-23	2.1131e-17	DLGAP1-AS1;DLGAP1-AS2	HK1_SE:625	2	1
18	right	3602857	3658928	8.99422e-23	2.1131e-17	RP11-874J12.4	HK1_SE:623	1	1
18	right	12602500	12647500	2.71933e-06	2.75622e-06	SPIRE1;AP005482.1;PSMG2	HK1_SE:626	3	1
18	left	19927500	20047500	2.15243e-08	1.96656e-08	RP11-535A5.1	HK1_SE:627	1	1
18	right	74780277	74834722	4.60234e-16	4.75823e-16	MBP	HK1_SE:628	1	1
9	right	4145000	4295000	4.08916e-06	0.00113586	RP11-358M14.2	HK1_SE:316	1	1
9	right	14277500	14317500	3.65895e-07	3.51773e-07	RP11-120J1.1	HK1_SE:318	1	1
9	left	21550000	21587500	1.27551e-06	1.31304e-06	MIR31HG	HK1_SE:319	1	1
9	right	21816428	21991785	8.91366e-19	6.65029e-24	CDKN2A;CDKN2B-AS1;RP11-149I2.4	HK1_SE:321	3	1
9	left	22007500	22087500	5.66009e-05	0.0022809	CDKN2A;CDKN2B-AS1;RP11-149I2.4;CDKN2B;UBA52P6	HK1_SE:323	5	1
9	right	22164166	22215833	3.65895e-07	8.97877e-05	RP11-408N14.1	HK1_SE:323	1	1
9	right	37957500	38060833	1.87002e-07	1.40068e-05	RP11-613M10.9;SHB	HK1_SE:324	2	1
9	left	75057500	75150833	1.13038e-07	1.98784e-05	RP11-217F16.1	HK1_SE:327	1	1
9	left	75092500	75145833	6.37524e-29	7.30673e-29	RP11-313E4.1	HK1_SE:327	1	1
9	right	75175000	75762500	2.62602e-05	3.28374e-05	ANXA1	HK1_SE:327	1	1
9	left	95432500	95477500	3.3007e-05	9.92438e-09	IPPK;RP11-476B13.2	HK1_SE:328	2	1
9	left	95432500	95857500	4.52993e-12	4.49396e-12	IPPK;RP11-476B13.2	HK1_SE:329	2	1
9	right	95478863	95540227	9.01338e-21	9.43156e-26	BICD2	HK1_SE:328	1	1
9	left	95512500	95862500	0.000616295	6.98573e-08	BICD2	HK1_SE:329	1	1
9	right	95512500	95862500	0.000616295	6.98573e-08	RP11-274J16.5;C9orf89	HK1_SE:328	2	1
9	right	95887500	96212500	0.00343038	3.60572e-07	RP11-165J3.6;FAM120AOS;FAM120A	HK1_SE:329	3	1
9	left	95857500	95897500	5.62709e-06	5.70715e-06	RP11-274J16.5;C9orf89	HK1_SE:329	2	1
9	right	95857500	95897500	5.62709e-06	5.70715e-06	NINJ1;RP11-370F5.4	HK1_SE:329	2	1
9	left	100465000	101015000	1.92945e-05	0.000421652	XPA;KRT18P13;AL445531.1	HK1_SE:331	3	1
9	left	100685000	101015000	0.000155321	0.000149471	C9orf156;Y_RNA	HK1_SE:331	2	1
9	right	100976250	101017500	3.44446e-12	3.25111e-12	TBC1D2	HK1_SE:331	1	1
9	right	110510000	110815000	0.000162242	0.000150407	RP11-240E2.2	HK1_SE:332	1	1
9	right	110512500	111587500	0.0022795	4.27984e-06	RPL36AP35;RP11-3J11.1	HK1_SE:332	2	1
9	left	113012500	113512500	0.00141383	0.00152186	TXN	HK1_SE:333	1	1
9	right	118355000	119332500	3.85352e-13	1.9846e-09	RP11-67K19.3	HK1_SE:336	1	1
9	right	118352500	118915000	0.00300386	0.000290165	PAPPA	HK1_SE:336	1	1
9	right	118362500	118762500	2.5964e-10	2.32135e-10	RP11-787B4.2	HK1_SE:336	1	1
9	left	127023214	127066071	1.27727e-21	1.16849e-21	NEK6;RP11-121A14.2;RP11-121A14.3	HK1_SE:339	3	1
9	left	127537282	127607934	0	0	NR6A1;RP11-175D17.3;OLFML2A	HK1_SE:340	3	1
9	left	131635227	131688409	3.2743e-30	2.7902e-30	CCBL1;LRRC8A	HK1_SE:343	2	1
9	right	131645000	131795000	2.60091e-11	6.41457e-05	SH3GLB2;FAM73B	HK1_SE:341	2	1
9	right	131905000	132095000	5.11296e-12	5.02032e-17	C9orf106;RP11-65J3.15;RP11-65J3.1	HK1_SE:344	3	1
9	right	131893750	132379375	2.60515e-18	2.02866e-18	NTMT1;C9orf50	HK1_SE:344	2	1
9	right	131895833	131934166	5.78982e-16	4.40821e-21	RP11-247A12.7;IER5L;RP11-247A12.8;RP11-247A12.2	HK1_SE:344	4	1
9	left	131932500	132098928	8.81807e-39	3.89904e-32	RP11-247A12.7;IER5L;RP11-247A12.8;RP11-247A12.2	HK1_SE:345	4	1
9	left	131937500	132247500	1.45979e-09	1.45717e-09	RP11-247A12.7;IER5L;RP11-247A12.8;RP11-247A12.2	HK1_SE:346	4	1
9	left	132045000	132095000	2.08747e-08	2.237e-08	RP11-344B5.2	HK1_SE:345	1	1
9	left	132097500	132250000	2.94806e-08	3.23728e-08	C9orf106;RP11-65J3.15;RP11-65J3.1	HK1_SE:346	3	1
9	right	132097500	132250000	2.94806e-08	3.23728e-08	AL353803.1;RP11-65J3.14;LINC00963;RP11-492E3.51	HK1_SE:345	4	1
9	right	132097500	132372500	5.82438e-07	5.15577e-09	NTMT1;C9orf50	HK1_SE:345	2	1
9	right	132251250	132375000	7.49841e-07	3.53082e-09	NTMT1;C9orf50	HK1_SE:346	2	1
9	left	137219166	137263333	3.17669e-18	2.96128e-18	RXRA	HK1_SE:349	1	1
9	left	140471500	140514500	1.25536e-22	1.0147e-17	DPH7;ZMYND19	HK1_SE:350	2	1

## Sheet: Gained_SE
chr1	gene_anchor_position	centroid1	centroid2	fdrBL	fdrDonut	genes	enhancers	number_genes	number_enhancers
22	right	19958333	20011666	0	0	ARVCF;TANGO2;MIR185	HK1_SE:680	3	1
22	left	19962500	20875000	0.0306815	0.000967334	MIR4761	HK1_SE:681	1	1
22	right	19962500	20875000	0.0306815	0.000967334	AC007050.17	HK1_SE:680	1	1
22	right	19964375	20071875	8.69398e-08	1.09707e-05	AC006547.13;DGCR8;MIR3618;MIR1306	HK1_SE:680	4	1
22	left	22080000	38645000	2.96691e-16	4.03003e-10	YPEL1;RN7SL280P	HK1_SE:689	2	1
22	left	22067500	38512500	1.9681e-07	4.46546e-07	RN7SL280P	HK1_SE:688	1	1
22	left	24255000	24595000	0.000108705	0.00232553	AP000350.4;AP000350.5;AP000350.6	HK1_SE:683	3	1
22	right	24587500	24912500	1.5167e-06	0.00222081	AP000355.2	HK1_SE:683	1	1
22	right	25387500	26887500	3.30402e-15	2.1269e-06	HPS4;SRRD	HK1_SE:684	2	1
22	left	38597500	38637500	0.00124188	1.69521e-06	PLA2G6;MAFF	HK1_SE:689	2	1
22	right	38627500	38667500	1.02166e-08	5.70715e-06	TMEM184B;AL020993.1	HK1_SE:689	2	1
22	right	41597500	41682500	0.00237038	0.0022809	RANGAP1;AL035681.1	HK1_SE:690	2	1
22	left	41842500	42062500	9.73871e-09	1.0673e-08	TOB2	HK1_SE:692	1	1
22	right	43080500	43144500	1.21119e-07	1.26571e-07	Y_RNA	HK1_SE:693	1	1
22	left	43145000	43335000	7.29474e-05	7.42657e-05	Y_RNA	HK1_SE:695	1	1
22	left	44755000	45145000	7.45085e-06	6.76387e-06	RP1-32I10.10	HK1_SE:698	1	1
22	right	44757500	44895000	4.88315e-13	3.47588e-10	LDOC1L	HK1_SE:697	1	1
22	left	45090312	45140000	6.51616e-12	6.72912e-12	PRR5-ARHGAP8;ARHGAP8	HK1_SE:698	2	1
22	right	46080000	46372500	4.88315e-13	4.65538e-13	WNT7B;CR536603.1	HK1_SE:701	2	1
22	left	46404500	46472500	5.90365e-07	5.65391e-10	CITF22-92A6.1	HK1_SE:704	1	1
22	left	46432500	46467500	4.56501e-05	4.6274e-05	LINC00899	HK1_SE:704	1	1
2	left	1635000	1727500	4.09226e-07	1.11141e-05	AC144450.1;AC144450.2	HK1_SE:60	2	1
2	left	9142500	9212500	9.01853e-11	1.744e-08	MBOAT2	HK1_SE:61	1	1
2	left	9347500	9462500	2.08734e-05	1.98784e-05	ASAP2	HK1_SE:62	1	1
2	left	9787500	10437500	0.000358106	0.000559333	RP11-521D12.1	HK1_SE:64	1	1
2	left	9892500	9982500	0.00198779	0.000106027	RNU4-73P;RP11-521D12.4	HK1_SE:63	2	1
2	right	9937500	10587500	1.64992e-05	2.24496e-05	ODC1;SNORA80B;RP11-320M2.1;AC007249.3	HK1_SE:63	4	1
2	left	10265000	10435000	0.000384956	0.00409724	RP11-254F7.4;RRM2	HK1_SE:64	2	1
2	left	20412500	20787500	2.58455e-07	0.000215138	SDC1	HK1_SE:66	1	1
2	left	20552500	20785000	0.0502353	0.0494447	PUM2;AC007041.1	HK1_SE:66	2	1
2	left	20565000	20775000	0.000318256	0.000301221	PUM2;AC007041.1	HK1_SE:66	2	1
2	left	20715000	20770000	1.66535e-15	9.47737e-12	AC012065.4	HK1_SE:66	1	1
2	left	28617500	28664166	4.29336e-14	4.42098e-14	AC104695.3;FOSL2;RP11-373D23.2	HK1_SE:67	3	1
2	right	28795000	29115000	4.61457e-06	0.000544878	WDR43	HK1_SE:68	1	1
2	right	28808500	28976000	2.21596e-10	7.13974e-14	PPP1CB	HK1_SE:68	1	1
2	left	36585000	36795000	3.66466e-10	3.4993e-10	RP11-490M8.1;CRIM1	HK1_SE:71	2	1
2	right	36580000	36727500	0.00804659	0.000657251	RP11-78I14.1	HK1_SE:70	1	1
2	right	36585000	36927500	0.000127062	0.00011931	VIT	HK1_SE:70	1	1
2	left	36589166	36630000	0.00507807	8.62518e-05	RP11-490M8.1;CRIM1	HK1_SE:70	2	1
2	left	43275000	43385000	1.68228e-05	0.00440743	AC016735.2;AC016735.3	HK1_SE:75	2	1
2	left	43270833	43309166	0.0227873	0.000142213	AC016735.2;AC016735.3	HK1_SE:74	2	1
2	left	45875000	45940000	6.11099e-09	6.90866e-09	PRKCE	HK1_SE:77	1	1
2	left	47035000	47080000	2.52398e-05	2.56378e-05	AC016722.1;AC016722.2	HK1_SE:79	2	1
2	right	47260000	47302500	2.29457e-05	2.36088e-05	AC073283.7	HK1_SE:80	1	1
2	left	54755000	54795000	0.000178967	1.90188e-06	AC092839.3;AC092839.1	HK1_SE:81	2	1
2	left	61107500	61177500	0.000635345	0.000657251	AC010733.4;REL	HK1_SE:83	2	1
2	right	61183750	61237500	8.95736e-05	7.52745e-07	PUS10;RNA5SP95;PEX13	HK1_SE:83	3	1
2	left	64819166	65106666	2.79948e-07	1.47621e-05	RNU6-100P;AC007365.1	HK1_SE:86	2	1
2	left	64875000	65062500	2.74793e-11	1.61027e-08	AC007365.3	HK1_SE:86	1	1
2	left	64872500	65095833	1.5675e-08	1.61027e-08	AC007365.3	HK1_SE:86	1	1
2	right	65545000	65662500	0.000265951	5.50851e-06	SPRED2;AC074391.1	HK1_SE:87	2	1
2	right	65547500	65617500	7.02389e-07	7.61385e-07	AC012370.2	HK1_SE:87	1	1
2	left	70568750	70613750	2.29457e-05	2.36088e-05	BRD7P6	HK1_SE:91	1	1
2	left	71688750	71737083	1.19004e-13	1.12558e-13	DYSF	HK1_SE:92	1	1
2	left	74155000	74219166	4.43543e-11	4.01872e-15	DGUOK	HK1_SE:93	1	1
2	right	85143500	85191500	1.00822e-15	9.62869e-16	KCMF1	HK1_SE:95	1	1
2	left	85412500	85512500	3.37422e-06	3.12791e-06	TCF7L1-IT1	HK1_SE:96	1	1
2	right	113372500	113482500	2.03498e-09	2.08292e-09	NT5DC4	HK1_SE:101	1	1
2	right	113402500	113492500	0.00218701	0.0022175	NT5DC4	HK1_SE:101	1	1
2	left	113535000	113635000	8.19189e-27	8.2339e-19	CKAP2L;IL1A	HK1_SE:104	2	1
2	left	113540833	113584166	8.12677e-11	8.37864e-11	IL1A	HK1_SE:103	1	1
2	left	113595000	113645000	4.87184e-10	5.15565e-10	IL1B;AC079753.1	HK1_SE:104	2	1
2	right	159752500	159830000	3.95305e-05	4.04641e-05	TANC1	HK1_SE:108	1	1
2	right	161070000	161250000	2.50556e-05	0.000361438	RMRPP3;MIR4785	HK1_SE:109	2	1
2	right	161292500	161347500	0.000103138	0.000106027	RBMS1	HK1_SE:110	1	1
2	left	169312500	169392500	0.00064806	3.72198e-05	RN7SL95P;RN7SL813P;CERS6	HK1_SE:111	3	1
2	right	169380000	169475000	0.00179335	0.00193215	RNU6-766P	HK1_SE:111	1	1
2	left	176987000	178013000	1.14732e-07	2.40994e-09	AC009336.1;HOXD10;HOXD-AS2;HOXD9;HOXD8;HOXD3	HK1_SE:116	6	1
2	left	177537500	178012500	0.0022795	1.47942e-09	RNU6ATAC14P	HK1_SE:116	1	1
2	left	178032500	178193125	1.37481e-18	4.3958e-22	AC079305.11;AC079305.5	HK1_SE:117	2	1
2	right	178032500	178262500	9.34458e-06	9.38324e-05	NFE2L2;AC074286.1;AGPS	HK1_SE:116	3	1
2	left	178125227	178192500	1.38277e-24	1.50741e-24	MIR3128;AC079305.10	HK1_SE:117	2	1
2	right	192033750	192112500	2.37832e-13	4.6593e-17	AC092614.2;MYO1B	HK1_SE:118	2	1
2	right	192032500	192250000	1.20416e-05	1.11141e-05	RNU6-1045P	HK1_SE:118	1	1
2	right	201617500	201652500	2.29457e-05	0.00326081	RNU1-133P	HK1_SE:120	1	1
2	right	201625833	201675833	4.12596e-14	3.96999e-14	AC007163.6;BZW1;RP11-469M7.1	HK1_SE:120	3	1
2	left	208107500	208199500	5.76113e-15	6.04509e-15	AC007879.2;AC007879.3;AC007879.7	HK1_SE:123	3	1
2	left	221055000	221092500	4.55785e-06	3.23728e-08	AC114765.3	HK1_SE:126	1	1
2	left	232379166	232470833	3.58457e-09	3.24295e-09	RNU2-22P;LINC00471	HK1_SE:129	2	1
2	left	232427500	232467500	1.2862e-05	1.88969e-07	AC104634.3	HK1_SE:129	1	1
2	right	232535000	232652500	0.0409359	0.0430528	PDE6D;COPS7B;RP11-690I21.1	HK1_SE:130	3	1
2	right	238762500	239112500	0.000553741	1.86459e-07	ILKAP	HK1_SE:134	1	1
2	right	238770000	238970000	3.20167e-11	3.24295e-09	SCLY	HK1_SE:134	1	1
15	left	29962500	30222500	7.66657e-12	6.62628e-12	RP11-680F8.1	HK1_SE:536	1	1
15	left	30125000	30223750	1.20299e-21	3.42849e-17	RP11-680F8.3	HK1_SE:536	1	1
15	right	39465000	39872500	2.30312e-40	5.75544e-35	THBS1;CTD-2033D15.1	HK1_SE:538	2	1
15	left	41895000	42105000	0.000108705	0.00232553	RP11-380D11.2	HK1_SE:539	1	1
15	right	42067500	42192500	1.54586e-12	3.25681e-10	SPTBN5;RP11-23P13.6;RP11-23P13.7	HK1_SE:539	3	1
15	right	56285000	56535000	0.000155321	0.000149471	RFX7;TEX9	HK1_SE:540	2	1
15	left	56290000	56347500	8.45849e-08	0.000219094	NEDD4;CNOT6LP1	HK1_SE:540	2	1
15	right	67355000	67545000	3.64056e-08	1.28079e-05	AAGAB;IQCH	HK1_SE:543	2	1
15	right	74680625	74830625	5.12066e-06	5.17343e-06	ARID3B	HK1_SE:544	1	1
15	right	74675000	75075000	7.95874e-06	8.52245e-06	CSK;MIR4513	HK1_SE:544	2	1
15	left	75932500	75972500	0.0205411	0.00113076	SNUPN;CTD-2026K11.2;IMP3;SNX33	HK1_SE:545	4	1
15	right	75977500	76092500	3.64008e-06	2.94339e-07	DNM1P49	HK1_SE:545	1	1
15	right	80865000	81070833	1.45979e-09	2.76075e-07	KIAA1199	HK1_SE:547	1	1
15	right	93354021	93444239	6.02612e-10	4.6593e-17	MIR3175	HK1_SE:550	1	1
15	left	94719166	94775833	8.12677e-11	8.37864e-11	RP11-452K20.1	HK1_SE:551	1	1
15	right	99404166	99445833	8.95736e-05	8.62518e-05	RP11-654A16.1	HK1_SE:552	1	1
21	left	29912500	30005000	0.00397633	0.00409724	LINC00161	HK1_SE:669	1	1
21	left	36515000	36565000	8.02288e-05	8.57368e-05	AF015262.2	HK1_SE:672	1	1
21	left	40127500	40170000	2.43935e-10	1.46577e-07	LINC00114	HK1_SE:674	1	1
21	left	40180000	40279166	2.94806e-08	3.23728e-08	ETS2	HK1_SE:675	1	1
21	right	40180000	40279166	2.94806e-08	3.23728e-08	SNORA62;RPSAP64;AP001044.2	HK1_SE:674	3	1
21	left	40187500	40400000	5.43227e-08	5.19211e-08	ETS2	HK1_SE:676	1	1
21	right	40187500	40400000	5.43227e-08	5.19211e-08	AF064858.10	HK1_SE:674	1	1
21	left	40227500	40275000	0.0236808	0.0238226	AP001042.1	HK1_SE:675	1	1
21	right	40227500	40275000	0.0236808	0.0238226	AP001043.1;SNORA62;RPSAP64;AP001044.2	HK1_SE:674	4	1
21	right	40280000	40505000	0.0124248	0.000301221	RPL23AP12	HK1_SE:675	1	1
21	left	40277500	40390000	0.00332016	0.00346865	SNORA62;RPSAP64;AP001044.2	HK1_SE:676	3	1
21	right	40277500	40390000	0.00332016	0.00346865	AF064858.8;AF064858.11;AF064858.10	HK1_SE:675	3	1
21	left	44387500	44937500	1.25366e-05	0.00188368	AP001630.5;PKNOX1	HK1_SE:678	2	1
21	left	44902500	44940000	0.00101072	0.00101332	LINC00313	HK1_SE:678	1	1
12	right	3412500	4437500	0.0025499	4.63536e-05	C12orf5;RP11-264F23.1	HK1_SE:428	2	1
12	left	4222500	4267500	0.000491973	0.000436673	RP11-320N7.1	HK1_SE:430	1	1
12	right	6178125	6389375	5.42113e-34	7.08522e-28	RP1-96H9.5	HK1_SE:431	1	1
12	right	6325000	6480000	2.89388e-08	1.80935e-05	SCNN1A;LTBR	HK1_SE:433	2	1
12	right	6445000	6642500	7.72875e-12	3.53082e-09	RP5-940J5.3;GAPDH;RP5-940J5.9;RP5-940J5.8	HK1_SE:435	4	1
12	right	10517500	10875000	0.00164446	0.00167897	YBX3	HK1_SE:436	1	1
12	right	11897500	12872500	0.00759482	0.000487817	CDKN1B;RP11-180M15.4;APOLD1	HK1_SE:437	3	1
12	left	12937500	12987500	1.87228e-06	0.000172637	RP11-59H1.4	HK1_SE:438	1	1
12	left	12957500	12992500	2.68076e-07	2.49675e-12	DDX47	HK1_SE:438	1	1
12	right	12983425	13043796	4.762e-42	3.0979e-32	GPRC5A	HK1_SE:438	1	1
12	left	13055000	13355000	3.64056e-08	1.28079e-05	GPRC5A;MIR614	HK1_SE:439	2	1
12	left	13250227	13358409	0	0	GSG1	HK1_SE:439	1	1
12	right	14415000	14925000	3.65285e-05	0.000965598	RP11-174G6.5;HIST4H4;H2AFJ	HK1_SE:440	3	1
12	right	14420000	14467500	0.012382	0.0119343	RN7SL676P	HK1_SE:440	1	1
12	left	27676666	27791666	2.21596e-10	7.13974e-14	PPFIBP1	HK1_SE:441	1	1
12	left	27740000	27780000	1.53734e-07	4.6274e-05	RP11-709A23.2	HK1_SE:441	1	1
12	left	27745000	28185000	1.17371e-05	1.08318e-05	RP11-709A23.2	HK1_SE:442	1	1
12	left	28130833	28181944	0	0	PTHLH	HK1_SE:442	1	1
12	left	28127812	28281875	0	0	PTHLH	HK1_SE:443	1	1
12	right	28187500	31887500	6.29865e-08	6.5896e-06	AMN1;RP11-467L13.4	HK1_SE:442	2	1
12	right	28282500	28342500	0.00837279	0.00831744	RP11-967K21.1	HK1_SE:443	1	1
12	left	29675000	30965000	2.2044e-12	5.31514e-10	RP11-310I24.1	HK1_SE:444	1	1
12	left	31812500	31892500	0.0137483	0.0138118	METTL20	HK1_SE:445	1	1
12	right	31895833	33054166	1.64508e-05	0.00149855	PKP2	HK1_SE:445	1	1
12	left	46770833	46945833	0.00300386	0.000290165	SLC38A2;RP11-474P2.2;RP11-96H19.1;RP11-474P2.4	HK1_SE:447	4	1
12	left	47480500	47664500	1.50917e-08	1.39548e-08	AMIGO2;PCED1B	HK1_SE:448	2	1
12	left	47627500	47667500	0.00408224	0.00436587	RP11-493L12.4	HK1_SE:448	1	1
12	right	52543500	52915500	1.19422e-11	8.413e-12	KRT5;AC055736.1	HK1_SE:450	2	1
12	right	52551500	52605500	9.81198e-10	1.12236e-09	C12orf80;LINC00592	HK1_SE:450	2	1
12	right	52552500	52722500	1.07977e-12	9.53728e-13	KRT83;AC121757.1	HK1_SE:450	2	1
12	right	52543750	53268750	9.15316e-23	4.63758e-20	RPL7P41	HK1_SE:450	1	1
12	right	52545000	52977500	6.71391e-07	5.83628e-07	KRT74	HK1_SE:450	1	1
12	right	52675000	52915000	0.000396416	0.000385689	KRT5;AC055736.1	HK1_SE:451	2	1
12	right	52675000	52722500	0.000243111	0.000245352	KRT83;AC121757.1	HK1_SE:451	2	1
12	left	65825000	65995000	3.75989e-06	1.99053e-08	KRT18P60	HK1_SE:453	1	1
12	left	65952500	66000000	1.45186e-05	1.47621e-05	RP11-221N13.2	HK1_SE:453	1	1
12	right	65995000	66045000	3.28735e-07	0.000548427	RP11-230G5.2;RP11-221N13.4;PCNPP3	HK1_SE:453	3	1
12	right	66025000	66220000	5.04939e-12	1.02944e-08	RPSAP52;HMGA2	HK1_SE:454	2	1
12	right	94945833	95040833	0.000184904	0.000199221	TMCC3	HK1_SE:458	1	1
12	left	95037500	95612500	6.13916e-06	0.00215659	TMCC3	HK1_SE:460	1	1
12	right	95612500	96200000	4.77836e-08	6.18544e-05	RNU6-247P;RP11-536G4.1	HK1_SE:460	2	1
12	right	95612500	95867500	7.8719e-08	5.17343e-06	RP11-490G8.1;METAP2	HK1_SE:460	2	1
12	left	96446000	96606500	3.12954e-09	3.53082e-09	LTA4H;RP11-256L6.4	HK1_SE:461	2	1
12	right	96585000	96795000	0.00206123	2.49645e-05	CDK17;RP11-117N2.2	HK1_SE:461	2	1
12	left	106535000	106685000	0.000155321	0.000149471	NUAK1	HK1_SE:462	1	1
12	right	106682500	106752500	0.00408224	0.00436587	POLR3B	HK1_SE:462	1	1
12	right	106695833	106747500	0.00408224	0.00436587	POLR3B	HK1_SE:462	1	1
12	right	109085000	109123750	2.53212e-24	2.4787e-24	CORO1C;Y_RNA	HK1_SE:463	2	1
12	left	109237500	111012500	0.000198986	0.000597977	SSH1;MIR619	HK1_SE:464	2	1
12	left	110937500	110982500	0.00128431	0.00123541	VPS29;SNORD50;RAD9B	HK1_SE:464	3	1
12	right	111010000	111505000	0.00262298	0.00310789	AC002978.1	HK1_SE:464	1	1
12	right	120665000	120895000	0.000162242	0.000150407	TRIAP1;GATC;RPL31P52;SRSF9;DYNLL1	HK1_SE:465	5	1
12	right	122907500	123012500	1.87002e-07	0.000561352	RSRC2;KNTC1	HK1_SE:466	2	1
12	right	123362500	123712500	4.81943e-18	3.05624e-11	C12orf65	HK1_SE:467	1	1
12	right	124867500	125052500	0.000384956	0.000361438	NCOR2	HK1_SE:468	1	1
12	right	125004166	125055833	1.93995e-06	1.8908e-06	NCOR2	HK1_SE:469	1	1
12	left	125392500	125427500	0.00507807	8.62518e-05	RNU6-927P;UBC;MIR5188	HK1_SE:470	3	1
12	right	125392500	125427500	0.00507807	8.62518e-05	RPL22P19	HK1_SE:470	1	1
1	left	9887500	9952500	6.32064e-08	2.36088e-05	CLSTN1	HK1_SE:2	1	1
1	right	9937500	10002500	9.01853e-11	7.99834e-11	LZIC;RP11-84A14.4;NMNAT1;RN7SKP269	HK1_SE:2	4	1
1	right	12495000	12625000	1.12214e-08	0.00193215	RNU6ATAC18P	HK1_SE:3	1	1
1	right	16115000	16245000	1.90185e-06	1.89494e-06	snoU13;RP1-134O19.3	HK1_SE:7	2	1
1	left	16122500	16168000	2.00459e-17	8.34506e-23	RP11-169K16.6;RP11-169K16.7	HK1_SE:8	2	1
1	right	16122500	16168000	2.00459e-17	8.34506e-23	RP11-169K16.8;RP11-169K16.9;SPEN	HK1_SE:7	3	1
1	left	16137500	16512500	5.67635e-05	0.0148126	RP11-169K16.7	HK1_SE:10	1	1
1	right	16137500	16512500	5.67635e-05	0.0148126	ARHGEF19-AS1	HK1_SE:7;HK1_SE:8	1	2
1	left	16405000	16465000	5.725e-11	5.9792e-11	FAM131C	HK1_SE:9	1	1
1	left	16404166	16514166	1.64354e-23	6.48154e-20	FAM131C	HK1_SE:10	1	1
1	right	16515833	16565833	0.00417249	0.00421341	ANO7P1;C1orf134;RSG1;MT1XP1	HK1_SE:10	4	1
1	left	17452500	17537500	2.00311e-14	2.10827e-14	PADI2	HK1_SE:11	1	1
1	left	17495000	17550000	5.21647e-09	1.55827e-05	Y_RNA	HK1_SE:11	1	1
1	left	17497500	17542500	5.66009e-05	0.0022809	Y_RNA	HK1_SE:11	1	1
1	right	17537500	17617500	1.2862e-05	1.40068e-05	MIR3972	HK1_SE:11	1	1
1	right	19252500	19402500	4.55785e-06	4.61336e-06	RP5-1126H10.2;AL137127.1	HK1_SE:12	2	1
1	right	19278750	19398750	9.81198e-10	1.12236e-09	RP5-1126H10.2;AL137127.1	HK1_SE:12	2	1
1	left	23035000	23155000	5.63785e-09	9.22969e-06	EPHB2;MIR4684	HK1_SE:13	2	1
1	left	26147500	26225000	1.45186e-05	2.61748e-07	RP1-317E23.6;RP1-317E23.3;MTFR1L;AL020996.1;RP1-317E23.7	HK1_SE:14	5	1
1	left	26187500	26227500	0.0329981	0.0022175	AUNIP;RP1-125I3.2;PAQR7	HK1_SE:14	3	1
1	right	26187500	26227500	0.0329981	0.0022175	STMN1;SNRPFP2;RP1-125I3.4;MIR3917;AL033528.1	HK1_SE:14	5	1
1	right	26225500	26325500	2.46593e-07	2.28605e-07	PAFAH2;SCARNA17;SCARNA18	HK1_SE:14	3	1
1	left	33177500	33242500	0.000103138	2.95008e-06	SYNC;RP11-114B7.6	HK1_SE:16	2	1
1	left	33184375	33236875	0.00587313	0.0052681	RP11-114B7.6	HK1_SE:16	1	1
1	left	33432500	33472500	2.56451e-08	1.17881e-05	RNF19B;FKSG48;RP4-803A2.1	HK1_SE:17	3	1
1	right	36615833	36757500	1.76904e-06	1.77798e-06	SH3D21	HK1_SE:18	1	1
1	right	36652500	36687500	5.66009e-05	5.78822e-05	THRAP3	HK1_SE:18	1	1
1	left	39576500	39651500	5.76113e-15	5.7718e-19	RNU6-608P	HK1_SE:19	1	1
1	right	39655833	39724166	2.98586e-05	2.91721e-05	RP11-420K8.1	HK1_SE:19	1	1
1	left	41329166	41365833	0.00237038	0.0022809	CITED4;RP5-1066H13.4	HK1_SE:20	2	1
1	right	41367500	41432500	0.000421562	0.00045094	CTPS1	HK1_SE:20	1	1
1	right	43412500	44125000	0.00216538	0.00449452	KDM4A	HK1_SE:21	1	1
1	right	43405000	43835000	5.22e-08	3.28299e-06	RP1-92O14.3;CDC20;ELOVL1	HK1_SE:21	3	1
1	left	43995000	44235000	0.000108705	0.00232553	PTPRF	HK1_SE:22	1	1
1	left	94717500	94767500	4.26951e-08	9.21161e-06	RP11-148B18.1	HK1_SE:27	1	1
1	left	109742500	109792500	1.20242e-13	1.22547e-13	RNU7-122P;SARS	HK1_SE:31	2	1
1	right	109817500	109942500	9.8108e-15	1.01071e-17	SORT1	HK1_SE:31	1	1
1	right	154388750	154450000	8.05505e-12	5.8646e-09	RP11-350G8.9	HK1_SE:33	1	1
1	right	154395000	154945000	0.000396416	1.08318e-05	PYGO2;RP11-307C12.12;SHC1;CKS1B;MIR4258;FLAD1	HK1_SE:33	6	1
1	left	157962500	158002500	1.16391e-14	1.29579e-14	KIRREL	HK1_SE:34	1	1
1	right	157962500	158002500	1.16391e-14	1.29579e-14	KIRREL-IT1	HK1_SE:34	1	1
1	left	161179166	161720833	2.99584e-07	4.16267e-07	ADAMTS4;NDUFS2;FCER1G;AL590714.1;APOA2	HK1_SE:35	5	1
1	left	161365000	161700000	2.8496e-07	1.15028e-05	RNU6-481P;RP11-122G18.7	HK1_SE:35	2	1
1	left	161481250	161706250	7.00211e-30	9.7766e-41	FCGR2A;RP11-25K21.6;HSPA6	HK1_SE:35	3	1
1	left	161505000	161710000	1.22109e-10	2.01497e-08	HSPA6;RPS23P10	HK1_SE:35	2	1
1	left	161589166	161702500	6.71391e-07	8.09792e-06	FCGR3A;HSPA7;RPS23P9;FCGR3B	HK1_SE:35	4	1
1	left	181001730	181054423	9.58621e-10	9.25611e-10	STX6;MR1	HK1_SE:39	2	1
1	left	181003000	181121000	2.55074e-20	4.75823e-16	STX6;MR1	HK1_SE:39	2	1
1	left	182992500	183247500	3.14402e-06	2.95008e-06	LAMC1	HK1_SE:41	1	1
1	left	186375000	186445000	0.00297281	0.00320762	AL596220.1;OCLM	HK1_SE:42	2	1
1	right	186456666	186645833	2.06405e-20	1.89067e-16	PTGS2;RP5-973M2.2	HK1_SE:42	2	1
1	left	186649166	186955833	3.14402e-06	2.95008e-06	PTGS2;RP5-973M2.2	HK1_SE:43	2	1
1	left	199712500	199752500	4.55785e-06	4.61336e-06	RP11-2L13.1	HK1_SE:44	1	1
1	left	201260000	201435000	2.92322e-05	2.82597e-05	PKP1	HK1_SE:45	1	1
1	left	202432500	202567500	1.20416e-05	3.48547e-07	RP11-175B9.3	HK1_SE:46	1	1
1	left	202508500	202560500	3.12954e-09	3.53082e-09	SNORA70	HK1_SE:46	1	1
1	left	204387500	205262500	0.000754974	1.59238e-05	PPP1R15B	HK1_SE:47	1	1
1	left	205192500	205232500	0.00128431	2.56378e-05	DSTYK;TMCC2;RP11-383G10.5	HK1_SE:47	3	1
1	left	206805000	207205000	0.00564099	0.000150407	RP11-343H5.6;DYRK3	HK1_SE:48	2	1
1	left	207067500	207202500	1.45186e-05	1.47621e-05	IL24;RP11-564A8.8;RP11-564A8.4	HK1_SE:48	3	1
1	left	209485000	209535000	0.00128431	2.56378e-05	RP11-372M18.1	HK1_SE:50	1	1
1	left	209548928	209598214	4.45267e-35	6.2214e-27	RP11-372M18.2	HK1_SE:53	1	1
1	right	209548928	209598214	4.45267e-35	6.2214e-27	MIR205HG	HK1_SE:50;HK1_SE:51	1	2
1	right	209582500	209825000	1.26246e-17	4.9159e-14	LAMB3	HK1_SE:52;HK1_SE:53	1	2
1	right	221995000	222135000	0.000552612	0.0245661	RP11-400N13.2	HK1_SE:55	1	1
1	right	222012500	222162500	4.00327e-05	0.000654998	RP11-815M8.1	HK1_SE:55	1	1
1	left	226255000	226310000	1.20254e-07	1.91225e-11	RP11-396C23.4;H3F3A	HK1_SE:56	2	1
1	right	226315000	226495000	1.09247e-06	1.02139e-06	LIN9;snoU13;snoU13;YBX1P9	HK1_SE:56	4	1
1	right	226314500	226379500	4.19333e-15	4.01872e-15	ACBD3;RP11-275I14.2	HK1_SE:56	2	1
10	left	63700833	63785833	0.00417249	0.00421341	AC067742.1	HK1_SE:363	1	1
10	left	69645000	69835000	0.0038551	0.00383444	RPL12P8;SIRT1	HK1_SE:364	2	1
10	right	69850357	69908214	6.02277e-24	5.25296e-24	RN7SKP202	HK1_SE:364	1	1
10	right	69852500	70092500	2.50556e-05	0.000361438	PBLD;HNRNPH3	HK1_SE:364	2	1
10	left	73712500	74087500	9.33052e-06	8.85106e-06	CHST3	HK1_SE:368;HK1_SE:369	1	2
10	left	73987500	74092500	9.89176e-06	9.41608e-06	ASCC1;ANAPC16;Y_RNA	HK1_SE:368;HK1_SE:369	3	2
10	right	74087500	75662500	0.00157746	0.00383657	PLAU	HK1_SE:368;HK1_SE:369	1	2
10	left	80825000	81085000	0.000974541	3.4353e-05	ZMIZ1-AS1;ZMIZ1	HK1_SE:374	2	1
10	left	80827500	80910000	9.73871e-09	1.0673e-08	ZMIZ1-AS1;ZMIZ1	HK1_SE:372	2	1
10	left	80832500	80950000	9.01853e-11	7.99834e-11	ZMIZ1-AS1;ZMIZ1	HK1_SE:373	2	1
10	right	95195833	95239166	2.46472e-25	2.53026e-25	MYOF	HK1_SE:376	1	1
10	left	99332500	99407500	8.05505e-12	9.07174e-12	ANKRD2;HOGA1;PI4K2A;PI4K2A	HK1_SE:378	4	1
10	left	103995000	104405000	0.000155321	0.00403246	ELOVL3;PITX3;GBF1	HK1_SE:379	3	1
10	left	104365000	104402500	0.0161209	7.9881e-05	RNU6-43P	HK1_SE:379	1	1
10	right	104405000	104472500	8.53371e-07	2.08292e-09	ARL3;SFXN2	HK1_SE:379	2	1
10	left	104874166	104999166	5.80658e-08	5.8422e-08	RP11-332O19.2	HK1_SE:380	1	1
10	left	105262500	105637500	4.68999e-07	4.81609e-07	RP11-225H22.5;NEURL	HK1_SE:382	2	1
10	left	112067500	112165000	8.69398e-08	4.02325e-10	SMNDC1	HK1_SE:383	1	1
10	right	112168750	112260000	1.83819e-20	1.68497e-20	RP11-525A16.4;DUSP5	HK1_SE:383	2	1
10	left	120962500	121437500	2.88252e-06	2.75551e-06	GRK5;RP11-567J24.4;RN7SL749P	HK1_SE:386	3	1
10	left	120967500	121030000	9.81198e-10	1.12236e-09	GRK5;RP11-567J24.4;RN7SL749P	HK1_SE:384	3	1
10	left	120963333	121072500	5.73943e-09	5.8646e-09	GRK5;RP11-567J24.4;RN7SL749P	HK1_SE:385	3	1
10	left	120960000	121007500	0.000351934	0.000340153	GRK5;RP11-567J24.4;RN7SL749P	HK1_SE:384	3	1
10	right	121075000	121445000	5.01632e-06	0.000133195	RP11-179H18.7	HK1_SE:385	1	1
10	right	121447500	121490833	0.00729959	0.000272096	INPP5F	HK1_SE:386	1	1
4	left	1735000	1795000	2.64874e-07	6.11997e-05	TMEM129;TACC3;AC016773.1	HK1_SE:176	3	1
4	right	1752500	1807500	9.35744e-08	1.78968e-09	FGFR3	HK1_SE:176	1	1
4	right	11548750	11628750	7.8719e-08	5.17343e-06	RP11-281P23.2	HK1_SE:177	1	1
4	left	69205000	69242500	0.0152172	0.00153994	YTHDC1	HK1_SE:184	1	1
4	left	69235000	69905000	1.29949e-05	0.000288489	MT2P1	HK1_SE:185	1	1
4	right	69235000	69905000	1.29949e-05	0.000288489	RP11-813N20.3;UGT2B7	HK1_SE:184	2	1
4	left	74922500	74975000	2.52398e-05	2.56378e-05	PPBPP2	HK1_SE:186	1	1
4	right	79475000	79695000	2.71818e-05	2.49645e-05	RP11-109G23.1;RP11-109G23.3;BMP2K	HK1_SE:187	3	1
4	right	79480000	79567500	0.0180328	0.0182004	Y_RNA;snoU13;RP11-792D21.2;HIGD1AP13	HK1_SE:187	4	1
4	right	173947500	174090000	0.000384956	0.000361438	RP11-10K16.1;GALNT7	HK1_SE:192	2	1
4	left	187647500	187763214	2.22467e-24	1.41508e-29	FAT1	HK1_SE:194	1	1
6	left	30718928	30785595	9.36237e-40	7.42583e-40	FLOT1;Y_RNA;XXbac-BPG252P9.10;IER3;RN7SL353P	HK1_SE:220	5	1
6	right	30718928	30785595	9.36237e-40	7.42583e-40	LINC00243	HK1_SE:220	1	1
6	right	30797500	30882500	7.72875e-12	7.51997e-12	RN7SL175P;GTF2H4;VARS2	HK1_SE:220	3	1
6	right	42237500	42487500	7.61649e-08	0.000609612	snoU13	HK1_SE:222	1	1
6	left	45390000	45680000	4.61457e-06	1.4185e-08	RP1-244F24.1	HK1_SE:226	1	1
6	left	52987500	53512500	1.39177e-06	0.000506413	RP11-506E9.3	HK1_SE:227	1	1
6	right	56505000	56710000	2.11044e-05	1.96577e-05	RP11-472M19.2	HK1_SE:228	1	1
6	left	126109642	126273214	1.1499e-23	1.02913e-19	NCOA7	HK1_SE:232	1	1
6	left	143607500	143655000	0.000421562	0.00045094	RP1-95L4.2	HK1_SE:234	1	1
6	right	150152500	150187500	0.00198779	0.00212191	LRP11;RP11-350J20.12;RP11-244K5.8;CCT7P1	HK1_SE:235	4	1
6	left	150470000	150575000	2.5387e-07	0.000249358	PPP1R14C	HK1_SE:236	1	1
6	right	150577500	150657500	2.93681e-07	2.95525e-07	RNU4-7P	HK1_SE:236	1	1
6	right	150587500	151187500	0.00308657	1.56463e-05	MTHFD1L	HK1_SE:236	1	1
6	left	158405833	158454166	6.32064e-08	6.03859e-08	SYNJ2	HK1_SE:237	1	1
6	right	159127500	159180000	0.0146573	0.00167897	MIR3918	HK1_SE:238	1	1
6	right	170537500	170600000	3.23778e-05	5.89215e-07	RP5-894D12.5;DLL1;FAM120B;RP5-894D12.4	HK1_SE:239	4	1
13	left	42535277	42613055	2.73743e-28	2.28794e-28	VWA8	HK1_SE:473	1	1
13	right	45336250	45385000	1.58855e-09	1.51753e-09	LINC00330	HK1_SE:476	1	1
13	right	106741250	107182500	0.00093635	4.04641e-05	EFNB2	HK1_SE:483	1	1
13	right	106756250	106802500	0.00111746	0.00113076	RNA5SP38	HK1_SE:483	1	1
13	right	106805000	107175000	1.12214e-08	8.70052e-06	EFNB2	HK1_SE:483	1	1
13	left	108862500	110662500	4.86232e-07	0.000106211	LIG4;ABHD13	HK1_SE:486	2	1
13	right	109805000	110437500	0.000182588	0.00125242	IRS2	HK1_SE:484	1	1
13	left	111367500	111612500	4.03402e-10	3.14371e-10	CARS2;ING1	HK1_SE:488	2	1
3	right	27595000	27675000	4.69921e-07	0.00383444	AC098614.1;AC098614.2;RP11-222K16.1	HK1_SE:138	3	1
3	right	45192500	45255000	1.2862e-05	0.000561352	TMEM158;AC010170.1	HK1_SE:139	2	1
3	left	111305000	111625000	3.75989e-06	3.32498e-06	ZBED2	HK1_SE:144	1	1
3	right	111615000	111685000	5.6689e-08	5.97145e-08	ABHD10	HK1_SE:144	1	1
3	left	112282500	112357500	0.00111746	3.51408e-05	ATG3;SLC35A5	HK1_SE:145	2	1
3	right	123452500	123527500	2.51997e-07	2.76075e-07	SNORA5	HK1_SE:147	1	1
3	left	124775000	124857500	0.00804659	0.00857717	HEG1;RNA5SP137	HK1_SE:148	2	1
3	right	125925000	125995000	4.28021e-06	4.63848e-06	RP11-71E19.1	HK1_SE:149	1	1
3	right	125922500	126077500	3.95305e-05	0.0010002	KLF15	HK1_SE:149	1	1
3	right	125927500	126192500	6.33847e-06	8.31134e-05	ZXDC	HK1_SE:149	1	1
3	right	134035277	134085833	2.5235e-20	2.43888e-20	RPL39P5;AMOTL2	HK1_SE:152	2	1
3	left	149104166	149295833	4.03402e-10	1.70352e-08	TM4SF1;TM4SF1-AS1;RP11-278L15.2	HK1_SE:153	3	1
3	right	150090000	150132500	0.00301009	0.00300442	TSC22D2	HK1_SE:154	1	1
3	right	159482500	159547500	0.00729959	0.000272096	AC021654.1;SCHIP1	HK1_SE:155	2	1
3	right	159485833	159529166	0.00101072	0.00101332	RNU2-31P;AC021654.1	HK1_SE:155	2	1
3	right	159502500	159537500	0.00420962	0.00405277	RNU2-31P;AC021654.1	HK1_SE:155	2	1
3	right	172397500	172467500	2.55074e-20	2.769e-20	ECT2	HK1_SE:159	1	1
3	left	176915000	177325000	0.000155321	0.00403246	TBL1XR1	HK1_SE:161	1	1
3	left	176912500	177072500	4.34941e-31	9.92021e-37	TBL1XR1	HK1_SE:160	1	1
3	left	177012500	177072500	1.2862e-05	1.40068e-05	LINC00501;ASS1P7	HK1_SE:160	2	1
3	left	177080000	177325000	9.13174e-05	8.31134e-05	RP11-706D8.3	HK1_SE:161	1	1
3	left	177167500	177315000	0.000103138	0.000106027	LINC00578	HK1_SE:161	1	1
3	left	187457500	188392500	5.4397e-13	1.78968e-09	BCL6;RP11-211G3.2	HK1_SE:165	2	1
3	left	188300000	188390000	0.00397633	0.00409724	LPP-AS1	HK1_SE:165	1	1
3	right	188989166	189555833	1.45979e-09	4.21907e-12	MIR944	HK1_SE:166	1	1
3	right	189680000	190170000	0.0193159	1.96577e-05	TMEM207	HK1_SE:167	1	1
3	right	189782500	189837500	4.55785e-06	4.61336e-06	LEPREL1;RN7SL486P;LEPREL1-AS1	HK1_SE:168	3	1
3	right	193592500	193855500	9.01853e-11	7.99834e-11	RP11-135A1.2;HES1;RN7SL215P	HK1_SE:171	3	1
3	left	196470000	196515000	9.68876e-06	9.21161e-06	PAK2;U4	HK1_SE:172	2	1
3	left	197024500	197234500	1.0588e-23	6.20365e-19	DLG1;MIR4797;DLG1-AS1	HK1_SE:175	3	1
3	right	197024500	197234500	1.0588e-23	6.20365e-19	RP13-616I3.1;AC128709.1	HK1_SE:173	2	1
3	right	197092500	197182500	0.000421562	0.00045094	AC128709.3;AC128709.4;AC128709.2	HK1_SE:174	3	1
16	right	1755000	1875000	4.47855e-07	4.20165e-07	HAGH;FAHD1	HK1_SE:554	2	1
16	right	1762500	1825833	1.42272e-17	2.60671e-14	NME3;MRPS34;EME2;NUBP2	HK1_SE:554	4	1
16	left	4535000	4995000	5.90247e-17	5.77896e-17	NMRAL1;HMOX2	HK1_SE:555	2	1
16	left	4668750	5001250	1.67246e-06	1.45169e-06	UBALD1;MGRN1	HK1_SE:555	2	1
16	left	4745000	4995000	7.00209e-07	6.37631e-07	NUDT16L1	HK1_SE:555	1	1
16	left	9057500	9187500	3.37422e-06	3.12791e-06	USP7;RP11-77H9.8	HK1_SE:556	2	1
16	right	11682500	11732500	9.73871e-09	1.0673e-08	LITAF	HK1_SE:557	1	1
16	left	27212500	27327500	4.55785e-06	4.61336e-06	KDM8;CTD-3203P2.1	HK1_SE:559	2	1
16	left	68562500	68682500	8.69398e-08	9.515e-08	ZFP90;RNU4-36P	HK1_SE:561	2	1
16	left	68562500	68832500	5.87345e-12	7.14973e-10	ZFP90;RNU4-36P	HK1_SE:562	2	1
16	right	68696666	68780833	1.5675e-08	1.61027e-08	CDH1;RNA5SP429	HK1_SE:561	2	1
16	left	68777500	69027500	6.63223e-06	0.00011931	CDH1;RNA5SP429	HK1_SE:564	2	1
16	right	69025000	69140000	4.02259e-09	3.91304e-09	HAS3;CHTF8	HK1_SE:564	2	1
16	right	69435000	69775000	0.000393304	0.000418845	NQO1;CTD-2033A16.3;NOB1	HK1_SE:566	3	1
16	right	69432500	69472500	0.000167562	0.000169935	CYB5B;RP11-343C2.10	HK1_SE:566	2	1
16	right	70721000	70797000	1.78354e-20	1.97015e-20	VAC14-AS1	HK1_SE:567	1	1
16	left	75233750	75433750	1.3734e-15	2.08292e-09	RP11-331F4.1;CTRB2	HK1_SE:569	2	1
16	right	82665000	84535000	0.0030867	4.0409e-05	RP11-517C16.4	HK1_SE:572	1	1
16	right	82665000	84395000	0.00247389	0.00508441	ATP2C2	HK1_SE:572	1	1
16	left	84535000	85035000	0.000869394	2.75415e-07	RP11-517C16.4	HK1_SE:573	1	1
16	left	85205000	85385000	3.64056e-08	1.28079e-05	CTC-786C10.1	HK1_SE:574	1	1
16	left	85207500	85587500	0.000127062	0.00011931	CTC-786C10.1	HK1_SE:576	1	1
16	left	85335000	85438333	1.00944e-13	8.311e-14	MIR5093	HK1_SE:574	1	1
16	right	85387500	85647500	4.88315e-13	3.47588e-10	GSE1	HK1_SE:574	1	1
16	right	85555000	85785000	7.45085e-06	0.000360785	C16orf74;MIR1910;RP11-568J23.4	HK1_SE:575	3	1
16	left	87817777	87898055	0	0	RP4-536B24.4	HK1_SE:577	1	1
16	right	87817777	87898055	0	0	SLC7A5	HK1_SE:577	1	1
16	right	89385000	89627500	0.00147931	8.63131e-05	RPL13;SNORD68;CPNE7	HK1_SE:579	3	1
11	right	2212500	2912500	0.00603557	0.000266314	CDKN1C;SLC22A18AS;SLC22A18	HK1_SE:393	3	1
11	right	2217500	2442500	1.52913e-08	2.99438e-07	TRPM5	HK1_SE:393	1	1
11	right	2227500	2277500	1.45186e-05	1.47621e-05	ASCL2	HK1_SE:393	1	1
11	left	9780833	9924166	1.01886e-14	8.79025e-15	RP11-540A21.2;SBF2-AS1	HK1_SE:397	2	1
11	right	9862500	10327500	6.21214e-08	2.95008e-06	SBF2;RP11-351I24.1;ADM;AMPD3	HK1_SE:396	4	1
11	right	9925000	10327500	9.38566e-07	1.70352e-08	SBF2;RP11-351I24.1;ADM;AMPD3	HK1_SE:397	4	1
11	left	10835000	10925000	9.66196e-12	3.47421e-07	EIF4G2;SNORD97;RP11-685M7.3	HK1_SE:398	3	1
11	left	34949166	35001666	0.000124522	0.00405277	APIP;PDHX;MIR1343	HK1_SE:406	3	1
11	right	34997500	35167500	9.59506e-07	2.96289e-10	RP4-607I7.1;CD44	HK1_SE:406	2	1
11	left	45935000	46265000	0.00411328	0.00403246	RP11-618K13.2;C11orf94;PEX16;GYLTL1B	HK1_SE:408	4	1
11	right	61137500	61197500	4.00327e-05	3.72198e-05	CPSF7;RP11-286N22.8;SDHAF2;RN7SL23P	HK1_SE:410	4	1
11	right	64615000	64782500	1.16391e-14	2.69831e-11	ARL2;RP11-399J13.3;AP000436.4;SNX15	HK1_SE:413	4	1
11	right	64615625	64656250	1.16982e-29	2.05763e-29	EHD1;AP001187.11;AP001187.1;RP11-665N17.4;MIR192;MIR194-2	HK1_SE:413	6	1
11	left	65139166	65237500	7.11435e-10	3.51773e-07	RP11-867O8.5;SLC25A45;FRMD8	HK1_SE:414	3	1
11	left	66887500	67085000	2.15243e-08	1.77798e-06	KDM2A	HK1_SE:415	1	1
11	left	67023125	67082500	0	0	ADRBK1	HK1_SE:415	1	1
11	right	69167500	69215000	3.02978e-06	2.70794e-06	RP11-211G23.1	HK1_SE:418	1	1
11	right	69892500	69927500	0.000470509	0.000458675	ANO1-AS2;RNU6-1175P;ANO1	HK1_SE:420	3	1
11	left	70245000	71015000	0.000869394	0.00083398	AP000487.5;CTTN	HK1_SE:421	2	1
11	right	102152500	102194166	8.69398e-08	9.515e-08	RP11-864G5.8;RNU6-952P;BIRC3	HK1_SE:424	3	1
11	right	119548500	119599500	2.06102e-08	1.70352e-08	PVRL1;CTD-2523D13.2	HK1_SE:425	2	1
19	left	1655000	1747500	2.94806e-08	4.61336e-06	TCF3	HK1_SE:629	1	1
19	left	1875000	2065000	0.0014249	2.3576e-05	KLF16;CTB-31O20.8;CTB-31O20.2;CTB-31O20.9;ABHD17A	HK1_SE:630	5	1
19	left	3997500	4062500	0.000184904	0.000199221	EEF2;SNORD37;PIAS4	HK1_SE:632	3	1
19	left	13262500	13952500	1.10379e-06	5.15831e-06	CTC-250I14.3;STX10;IER2;CTC-250I14.6;CTC-250I14.1	HK1_SE:635	5	1
19	right	13262500	13952500	1.10379e-06	5.15831e-06	MIR24-2;MIR27A;MIR23A	HK1_SE:634	3	1
19	left	13962500	14625000	2.99775e-05	2.25253e-08	NANOS3	HK1_SE:636	1	1
19	right	13962500	14625000	2.99775e-05	2.25253e-08	TECR	HK1_SE:635	1	1
19	left	39130000	39180000	0.000786745	6.8666e-07	ACTN4	HK1_SE:640	1	1
19	right	48217500	48292500	1.50917e-08	1.39548e-08	SEPW1;RPL23AP80;CTD-2571L23.9	HK1_SE:642	3	1
8	left	10517500	10574166	2.79702e-18	2.6301e-18	MIR4286;C8orf74	HK1_SE:278	2	1
8	right	17594166	17659166	7.72875e-12	7.51997e-12	MTUS1;RP11-156K13.1;RP11-806O11.1	HK1_SE:280	3	1
8	left	25042500	25082500	0.00218701	0.0022175	RN7SL651P;DOCK5	HK1_SE:281	2	1
8	left	32127500	32165000	4.60234e-16	4.75823e-16	RNA5SP263	HK1_SE:283	1	1
8	right	49618125	49833750	2.78344e-23	1.09235e-28	RP11-22C8.1;SNAI2	HK1_SE:285	2	1
8	left	53655416	53745416	4.02259e-09	2.63779e-12	RB1CC1	HK1_SE:287	1	1
8	right	53745500	53852500	0.00420962	0.000127328	NPBWR1	HK1_SE:287	1	1
8	right	54865000	54935000	0.00218701	0.0022175	TCEA1	HK1_SE:289	1	1
8	left	101575357	101688214	3.40402e-17	1.29193e-21	ANKRD46;GAPDHP62	HK1_SE:295	2	1
8	right	101692500	101730000	0.00366903	2.36088e-05	PABPC1;AP001205.1	HK1_SE:295	2	1
8	right	101695000	101842500	0.00408224	9.41608e-06	RNU4-83P	HK1_SE:295	1	1
8	left	101962500	102462500	1.5167e-06	0.00222081	YWHAZ;RN7SL685P;Y_RNA	HK1_SE:297	3	1
8	left	102386785	102443928	8.12677e-11	6.03859e-08	NACAP1;DUXAP2	HK1_SE:297	2	1
8	right	119030625	119114375	1.2702e-11	1.23496e-11	EXT1	HK1_SE:300	1	1
8	left	126925000	127825000	0.000382477	6.08846e-10	RNU6-442P	HK1_SE:304	1	1
8	right	127454318	127568409	9.81198e-10	2.95525e-07	FAM84B;RP11-103H7.5;RP11-89K10.1	HK1_SE:303	3	1
8	right	127835000	130695000	0.000855634	0.00122576	CCDC26;RP11-419K12.1	HK1_SE:304	2	1
8	left	127845000	128865000	0.000143548	5.81695e-09	PCAT1	HK1_SE:307	1	1
8	left	127845000	128680000	0.000382477	0.000360785	PCAT1	HK1_SE:306	1	1
8	right	127842500	128307500	0.00109895	8.31134e-05	RP11-382A18.3	HK1_SE:304	1	1
8	left	128225000	128867500	2.68357e-05	1.608e-06	RP11-255B23.4;CCAT1	HK1_SE:307	2	1
8	right	128230227	128310227	0	0	RP11-382A18.3	HK1_SE:305	1	1
8	left	128230000	128680000	6.22489e-15	5.91022e-15	RP11-255B23.4;CCAT1	HK1_SE:306	2	1
8	left	128307500	128862500	4.19963e-05	3.78029e-05	RP11-382A18.3	HK1_SE:307	1	1
8	left	128751500	128864500	2.21596e-10	7.13974e-14	CASC11;MYC	HK1_SE:307	2	1
8	left	142020000	142085000	3.65337e-10	3.78097e-10	PTK2	HK1_SE:313	1	1
8	left	142139166	142179166	4.40375e-05	4.20578e-05	DENND3;RP11-809O17.1	HK1_SE:314	2	1
14	left	22695000	22785000	1.10989e-09	1.1771e-09	TRAV35;TRAV36DV7	HK1_SE:489	2	1
14	left	22735000	22785000	2.64417e-08	0.000205025	TRAV37;TRAV38-1;TRAV38-2DV8	HK1_SE:489	3	1
14	right	22735000	22785000	2.64417e-08	0.000205025	TRAV39;TRAV40;TRAV41	HK1_SE:489	3	1
14	right	29147500	29235000	0.000553758	1.40068e-05	RP11-966I7.1;FOXG1;C14orf23	HK1_SE:490	3	1
14	right	35037500	35887500	0.000520032	4.81609e-07	NFKBIA;DNAJC8P1	HK1_SE:491	2	1
14	left	50335000	50470000	4.04745e-07	6.79536e-13	RN7SL3;RN7SL2	HK1_SE:496	2	1
14	left	50361785	50483571	6.18253e-17	6.45922e-17	ARF6;RNU6-189P	HK1_SE:496;HK1_SE:497	2	2
14	left	50423500	50468500	1.48134e-16	1.32567e-16	RP11-58E21.4	HK1_SE:496	1	1
14	right	50423500	50468500	1.48134e-16	1.32567e-16	C14orf182	HK1_SE:496	1	1
14	right	50470000	50570000	1.03303e-06	1.14765e-06	RP11-58E21.5;RP11-58E21.7;C14orf183;VCPKMT	HK1_SE:496	4	1
14	right	51865000	52245000	0.00522861	6.11997e-05	OR7E106P;RP11-280K24.4;OR7E159P;RP11-280K24.6	HK1_SE:499	4	1
14	left	51958928	52018928	3.31082e-11	2.96453e-11	FRMD6	HK1_SE:501	1	1
14	left	54310833	54575833	0.000127062	0.00011931	AL162759.1	HK1_SE:502	1	1
14	right	55562500	55599166	5.1177e-08	9.24691e-05	LGALS3	HK1_SE:504	1	1
14	left	61445000	61650000	1.13769e-05	0.038626	TRMT5;RP11-193F5.4;RNU6-398P;SLC38A6	HK1_SE:505	4	1
14	right	61637500	62037500	3.66787e-05	0.00560264	RP11-47I22.2;RP11-47I22.3	HK1_SE:505	2	1
14	left	64972500	65184166	9.73871e-09	1.0673e-08	ZBTB25;ZBTB1	HK1_SE:507	2	1
14	left	65005000	65195000	4.47855e-07	0.000146094	RP11-973N13.4;RP11-973N13.5;HSPA2;PPP1R36	HK1_SE:507	4	1
14	right	74185000	74415000	6.35062e-05	5.88633e-05	RP5-1021I20.5;FAM161B;COQ6	HK1_SE:511	3	1
14	right	74222500	74267500	0.00729959	0.00703247	ELMSAN1;RP5-1021I20.1;snoU13	HK1_SE:511	3	1
14	left	74957500	75037500	4.55785e-06	4.61336e-06	NPC2;MIR4709;RAP1AP;ISCA2	HK1_SE:512	4	1
14	right	75079166	75229166	1.16391e-14	2.69831e-11	YLPM1	HK1_SE:513	1	1
14	left	75080000	75130000	0.000167562	0.000169935	LTBP2;CTD-2207P18.2	HK1_SE:514	2	1
14	right	75080000	75130000	0.000167562	0.000169935	RP11-173A8.2	HK1_SE:513	1	1
14	left	75087500	75462500	3.98065e-07	0.00340547	LTBP2;CTD-2207P18.2	HK1_SE:515	2	1
14	right	75087500	75462500	3.98065e-07	0.00340547	EIF2B2;RP11-950C14.3	HK1_SE:513;HK1_SE:514	2	2
14	right	75087500	75347500	0.000259826	0.00436587	RP11-316E14.2;DLST	HK1_SE:513;HK1_SE:514	2	2
14	right	75412500	75762500	1.66953e-06	1.55693e-06	RP11-293M10.4;RP11-293M10.5	HK1_SE:515	2	1
14	right	75419642	75471071	6.65785e-09	6.16051e-09	EIF2B2;RP11-950C14.3	HK1_SE:515	2	1
14	left	77340000	77377500	0.000680207	0.000653641	RP11-488C13.1	HK1_SE:516	1	1
14	left	99993750	100043750	0.00175893	0.00175863	RP11-688G15.3	HK1_SE:521	1	1
14	right	99993750	100043750	0.00175893	0.00175863	Y_RNA	HK1_SE:521	1	1
14	right	100045000	100705000	7.79426e-11	1.93787e-13	RP11-638I2.4;YY1	HK1_SE:521	2	1
14	left	101460000	101945000	0.0113787	0.0118715	SNORD113;SNORD113;SNORD114-20;SNORD114-21;SNORD114-22;SNORD114-23;SNORD114-24;SNORD114-25;SNORD114-26;SNORD114-27;SNORD114-28;SNORD114-29;SNORD114-30;SNORD114-31;SNORD113;SNORD112;SNORD113	HK1_SE:523	17	1
14	right	103575000	103755000	6.53623e-17	7.14878e-17	RAP2CP1;RP11-45P15.2	HK1_SE:527	2	1
14	left	103572500	103607500	0.00237038	0.0022809	RP11-736N17.8;EXOC3L4	HK1_SE:528	2	1
14	right	103572500	103607500	0.00237038	0.0022809	RP11-736N17.4;RPL21P12	HK1_SE:527	2	1
14	left	103604166	103652500	5.90365e-07	0.000251257	LINC00677;TNFAIP2;RP11-736N17.4;RPL21P12	HK1_SE:528	4	1
14	right	103604166	103652500	5.90365e-07	0.000251257	GCSHP2;LINC00605	HK1_SE:528	2	1
14	right	103652500	103717500	0.00237038	0.0471482	RPL21P13	HK1_SE:528	1	1
14	left	103976666	104020000	0.000569246	0.000570994	CKB	HK1_SE:529	1	1
14	left	104182500	104382500	9.81198e-10	1.8791e-12	XRCC3;AL049840.1;RP11-73M18.9;ZFYVE21;Y_RNA	HK1_SE:530	5	1
14	left	104182500	105147500	6.92025e-05	5.33766e-05	XRCC3;AL049840.1;RP11-73M18.9;ZFYVE21;Y_RNA	HK1_SE:532	5	1
14	left	104335000	105155000	0.000855634	0.00122576	CTD-2134A5.4;CTD-2134A5.3	HK1_SE:532	2	1
14	right	104335000	105155000	0.000855634	0.00122576	MIR4710;RP11-982M15.6;INF2;RP11-982M15.5	HK1_SE:530	4	1
14	right	104385000	104457500	7.11435e-10	7.31423e-10	AL136001.1	HK1_SE:530	1	1
14	right	104387500	104450000	3.75038e-09	5.54799e-05	AL136001.1	HK1_SE:530	1	1
14	right	104551250	104597500	8.05505e-12	5.91022e-15	MIR203;CTD-2223O18.1;KIF26A	HK1_SE:531	3	1
14	right	104582500	105267500	1.20702e-09	1.75413e-09	AKT1;ZBTB42	HK1_SE:531	2	1
14	right	105152500	105332500	7.8719e-08	7.32094e-08	CTD-3051D23.4;CEP170B	HK1_SE:532	2	1
14	left	105152500	105442500	3.20167e-11	3.24295e-09	MIR4710;RP11-982M15.6;INF2;RP11-982M15.5	HK1_SE:533	4	1
14	right	105152500	105442500	3.20167e-11	3.24295e-09	AHNAK2;C14orf79	HK1_SE:532	2	1
14	left	105152500	105557500	0.000389525	0.00035003	MIR4710;RP11-982M15.6;INF2;RP11-982M15.5	HK1_SE:534	4	1
14	right	105152500	105557500	0.000389525	0.00035003	RP11-44N21.1	HK1_SE:532	1	1
14	right	105150000	105492500	0.000389525	0.00035003	CDCA4	HK1_SE:532	1	1
14	right	105151250	105216250	2.21596e-10	2.07257e-10	SIVA1	HK1_SE:532	1	1
14	left	105265000	105555000	0.00173388	0.00177528	AKT1;ZBTB42	HK1_SE:534	2	1
14	left	105277500	105441250	3.04704e-10	1.14587e-07	ZBTB42;LINC00638	HK1_SE:533	2	1
14	right	105444750	105494750	1.34422e-34	2.57934e-34	CDCA4	HK1_SE:533	1	1
14	right	105438500	105638500	5.80658e-08	3.25681e-10	JAG2;RP11-44N21.4;NUDT14	HK1_SE:533	3	1
14	left	105840000	105957500	2.03498e-09	2.08292e-09	RPS20P33	HK1_SE:535	1	1
14	left	105892500	105957500	1.17891e-12	4.24119e-09	RP11-521B24.3;MTA1	HK1_SE:535	2	1
20	right	337500	454166	3.14402e-06	2.95008e-06	TBC1D20	HK1_SE:643	1	1
20	right	349166	392500	1.5675e-08	4.19824e-06	RBCK1	HK1_SE:643	1	1
20	right	3767500	3872500	1.76904e-06	1.96656e-08	RP11-119B16.2;PANK2	HK1_SE:644	2	1
20	right	4425000	4560000	0.0284411	0.000530846	RPL7AL2	HK1_SE:645	1	1
20	left	5592500	5632500	0.00713773	0.00752326	GPCPD1	HK1_SE:646	1	1
20	left	19865000	19965000	2.98715e-11	1.0673e-08	RIN2	HK1_SE:647	1	1
20	left	24972500	25227500	9.38566e-07	8.64178e-07	APMAP	HK1_SE:651	1	1
20	right	30151590	30196136	0	0	ID1;MIR3193	HK1_SE:652	2	1
20	left	30267500	30307500	3.3007e-13	3.39149e-13	RP11-243J16.7	HK1_SE:653	1	1
20	right	33882500	33997500	2.51997e-07	2.56378e-05	UQCC1	HK1_SE:656	1	1
20	left	33892500	33927500	0.000491973	0.000436673	FAM83C	HK1_SE:656	1	1
20	right	33895000	34475000	0.0127762	0.00129273	HIGD1AP16;RNU4-40P	HK1_SE:656	2	1
20	left	35914687	35992812	5.25246e-26	2.26649e-19	MANBAL	HK1_SE:658	1	1
20	right	43672500	43857500	1.18785e-08	5.88907e-06	SEMG2;RP1-300I2.3;RP1-300I2.2	HK1_SE:660	3	1
20	right	43672500	43724166	4.26951e-08	9.21161e-06	KCNS1	HK1_SE:660	1	1
20	right	43675000	44045000	1.15389e-05	0.000295138	TP53TG5;DBNDD2;PIGT	HK1_SE:660	3	1
20	right	49055000	49345000	1.74599e-09	6.37631e-07	PARD6B	HK1_SE:662	1	1
20	left	49057500	49112500	0.000184904	0.00421341	RN7SL636P	HK1_SE:663	1	1
20	right	49057500	49112500	0.000184904	0.00421341	PTPN1	HK1_SE:662;HK1_SE:663	1	2
20	left	52405000	52745000	3.09651e-07	1.96577e-05	AC006076.1	HK1_SE:665	1	1
20	left	52483333	52527500	2.52398e-05	2.56378e-05	SUMO1P1	HK1_SE:664	1	1
20	right	60962500	61437500	4.91524e-08	4.50154e-08	MRGBP;OGFR-AS1;OGFR;COL9A3	HK1_SE:667	4	1
17	left	1622954	1684318	4.37789e-06	4.19824e-06	TLCD2;MIR22HG;WDR81	HK1_SE:581	3	1
17	left	4117500	4315000	1.50917e-08	1.39959e-10	RYKP1	HK1_SE:583	1	1
17	right	4325000	4445000	0.0362428	0.00106898	MYBBP1A	HK1_SE:583	1	1
17	left	5415000	5735000	0.000396416	0.000385689	RNU7-31P	HK1_SE:585	1	1
17	left	5687083	5735833	8.12677e-11	8.37864e-11	WSCD1	HK1_SE:585	1	1
17	right	15535000	18635000	0.0012057	0.00398941	FBXW10	HK1_SE:587	1	1
17	right	15821250	15861250	0.000351934	0.000340153	ADORA2B	HK1_SE:588	1	1
17	right	15857500	15902500	2.17221e-09	2.0671e-09	ZSWIM7;TTC19	HK1_SE:589	2	1
17	right	16762500	20462500	0.000259841	0.000749335	TBC1D3P3;RP11-434D2.3;RP11-434D2.8;RP11-434D2.11;COTL1P2	HK1_SE:590	5	1
17	right	16905000	17105000	1.13769e-05	1.03187e-05	PLD6	HK1_SE:591	1	1
17	right	16902500	16947500	0.00111746	0.00113076	MPRIP	HK1_SE:591	1	1
17	right	17587500	17747500	2.74793e-11	1.61027e-08	SREBF1;AC122129.1	HK1_SE:592	2	1
17	right	17870000	17942500	1.13038e-07	1.14587e-07	ATPAF2;GID4	HK1_SE:593	2	1
17	right	27475833	27619166	3.14402e-06	5.77998e-08	NUFIP2	HK1_SE:595	1	1
17	left	38597500	38717500	0.000243111	0.000245352	RP11-58O9.1;IGFBP4	HK1_SE:598	2	1
17	right	38675000	39675000	0.000859927	0.000969596	KRT13;KRT15;KRT19	HK1_SE:598	3	1
17	left	38960000	39822500	0.027152	0.00759432	KRT28;RP11-605F20.1	HK1_SE:600	2	1
17	right	39061666	39668333	1.5196e-10	8.83775e-08	KRT13;AC019349.5;KRT15	HK1_SE:599	3	1
17	right	39070000	39290000	0.000275731	0.000270987	KRTAP4-12;KRTAP4-6	HK1_SE:599	2	1
17	right	39062500	39477500	6.63223e-06	0.00011931	KRTAP16-1;KRTAP17-1;TBC1D3P7;AC003958.6	HK1_SE:599	4	1
17	left	39480000	39822500	2.68357e-05	1.608e-06	KRTAP16-1;KRTAP17-1;TBC1D3P7;AC003958.6	HK1_SE:600	4	1
17	left	39706250	39816250	3.65895e-07	7.06618e-13	LINC00974	HK1_SE:600	1	1
17	left	39739642	39788214	1.02166e-08	5.70715e-06	KRT9;KRT14	HK1_SE:600	2	1
17	left	39738928	39813928	1.5675e-08	1.61027e-08	KRT9;KRT14	HK1_SE:600	2	1
17	right	39845833	39947500	3.14402e-06	0.000106027	JUP	HK1_SE:600	1	1
17	left	43125000	43205000	0.000986567	3.47421e-07	DCAKD;NMT1	HK1_SE:602	2	1
17	left	43137500	43172500	0.00128431	0.00123541	DCAKD;NMT1;Y_RNA	HK1_SE:602	3	1
17	left	43395000	43447500	3.15033e-27	5.36434e-22	MAP3K14;RNA5SP443	HK1_SE:604	2	1
17	left	57785000	57865000	0.00297281	0.00320762	PTRH2;VMP1	HK1_SE:610	2	1
17	right	73674375	73731250	8.63732e-26	7.54088e-26	ITGB4	HK1_SE:614	1	1
17	left	76287500	76357500	0.000184904	0.000199221	RP11-219G17.4	HK1_SE:615	1	1
17	right	76287500	76357500	0.000184904	0.000199221	SOCS3;RP11-806H10.4;RN7SL236P	HK1_SE:615	3	1
17	left	76312500	76350000	2.60193e-11	2.44248e-08	AC061992.2	HK1_SE:615	1	1
17	left	78965000	79007500	0.0530151	0.0562242	RPL12P37;CHMP6;CTD-2561B21.7;AC127496.1	HK1_SE:619	4	1
17	left	79014166	79073333	1.20299e-21	1.29193e-21	CTD-2561B21.10;BAIAP2-AS1;BAIAP2	HK1_SE:620	3	1
5	right	36455833	36499166	1.2862e-05	0.000561352	RNA5SP181	HK1_SE:196	1	1
5	left	42907500	43002500	5.66009e-05	7.61385e-07	CTD-2325A15.3;CTD-2325A15.2;CTD-2201E18.4;CTD-2201E18.2	HK1_SE:197	4	1
5	right	57137500	57185000	1.76904e-06	1.77798e-06	RP11-478P10.1	HK1_SE:203	1	1
5	right	66290000	66505000	0.000143548	1.1673e-06	CD180	HK1_SE:204	1	1
5	left	95295000	95590000	3.14553e-14	3.4993e-10	ELL2;CTD-2337A12.1;FABP5P5	HK1_SE:205	3	1
5	left	95412500	95587500	6.31034e-16	3.72061e-07	MIR583	HK1_SE:205	1	1
5	left	118405000	118665000	7.79426e-11	3.32498e-06	CTB-161M19.4;snoU13	HK1_SE:206	2	1
5	right	118602500	118637500	3.04704e-10	1.98784e-05	RN7SL174P	HK1_SE:206	1	1
5	left	134369166	134472500	5.11314e-09	7.61385e-07	PITX1;CTC-349C3.1;CTC-276P9.1	HK1_SE:207	3	1
5	left	142585000	142645000	1.10989e-09	1.1771e-09	ARHGAP26-IT1	HK1_SE:209	1	1
5	left	148219166	148289166	5.82438e-07	5.15577e-09	ADRB2	HK1_SE:210	1	1
5	right	148291136	148361590	0	0	RP11-44B19.1	HK1_SE:210	1	1
5	left	148362500	149862500	1.16222e-09	1.68176e-07	RP11-44B19.1	HK1_SE:213;HK1_SE:214	1	2
5	left	150959285	151025000	1.32315e-17	1.46928e-17	FAT2	HK1_SE:215	1	1
5	right	150959285	151025000	1.32315e-17	1.46928e-17	CTB-113P19.4	HK1_SE:215	1	1
5	left	167731666	167788333	1.82341e-12	1.0212e-07	WWC1	HK1_SE:218	1	1
5	left	167730833	167788611	8.20132e-11	7.55353e-11	WWC1	HK1_SE:218	1	1
7	left	5462500	6325000	0.000754974	0.00118111	TNRC18;AC093620.5;AC092171.2;RP11-1275H24.2;RP11-1275H24.1;RP11-1275H24.3	HK1_SE:244	6	1
7	left	5465000	5635000	2.92489e-15	3.22379e-15	TNRC18;AC093620.5;AC092171.2;RP11-1275H24.2;RP11-1275H24.1;RP11-1275H24.3	HK1_SE:242	6	1
7	left	5535000	5635000	1.0425e-09	1.20046e-17	snoU13;MIR589	HK1_SE:242	2	1
7	left	5555000	5636875	1.27203e-16	1.13263e-12	FBXL18;AC006483.1	HK1_SE:242	2	1
7	left	6210000	6365000	4.83862e-12	1.45717e-09	Y_RNA	HK1_SE:244	1	1
7	left	6322500	6412500	3.23778e-05	0.00113076	CYTH3	HK1_SE:245	1	1
7	right	6322500	6412500	3.23778e-05	0.00113076	RAC1	HK1_SE:244	1	1
7	left	6387500	6422500	0.00587313	0.0052681	FAM220A	HK1_SE:245	1	1
7	left	30325000	30387500	4.02259e-09	2.63779e-12	ZNRF2;MIR550A1	HK1_SE:248	2	1
7	left	42962500	43662500	8.02162e-05	4.16267e-07	C7orf25;PSMA2;PSMA2;AC010132.11;MRPL32	HK1_SE:250	5	1
7	left	43617500	43682500	0.00218701	0.0022175	AC011738.1;STK17A	HK1_SE:250	2	1
7	right	55095833	55322500	8.99101e-22	8.08466e-22	RP11-339F13.2;CALM1P2	HK1_SE:256	2	1
7	right	55765000	56175000	0.00411328	0.00403246	PHKG1;snoU13;CHCHD2;NUPR1L	HK1_SE:257	4	1
7	right	75697500	75760000	7.02389e-07	7.61385e-07	AC005077.7	HK1_SE:261	1	1
7	left	86782500	86947500	3.64008e-06	3.78029e-05	AC005076.5;DMTF1	HK1_SE:263	2	1
7	right	100742500	100782500	2.47684e-12	2.5754e-12	SERPINE1	HK1_SE:265	1	1
7	right	100767500	100802500	2.29457e-05	0.00326081	AP1S1;MIR4653;VGF	HK1_SE:265	3	1
7	left	104585000	104865000	0.00564099	0.000150407	RP11-325F22.2	HK1_SE:266	1	1
7	left	104825000	104867500	2.31388e-08	2.37303e-05	CTB-152G17.5	HK1_SE:266	1	1
7	right	105705000	105925000	0.00411328	0.000149471	NAMPT;RP11-22N19.2	HK1_SE:267	2	1
7	right	105705000	105750833	5.27703e-08	2.70338e-11	SYPL1;DCAF13P1	HK1_SE:267	2	1
7	right	115897500	116225833	9.89176e-06	9.41608e-06	AC006159.4	HK1_SE:268	1	1
7	right	115902500	115995500	1.93995e-06	9.07174e-12	AC002066.2	HK1_SE:268	1	1
7	right	115902500	116082500	9.73871e-09	1.0673e-08	snoZ185	HK1_SE:268	1	1
7	right	115997500	116080000	1.76904e-06	8.50886e-05	snoZ185	HK1_SE:268	1	1
7	right	115997500	116148750	2.58141e-12	3.91304e-09	AC002066.1	HK1_SE:268	1	1
7	right	116037500	116140000	2.52398e-05	2.56378e-05	AC002066.1	HK1_SE:269	1	1
7	right	116037500	116167500	9.68876e-06	4.36244e-08	CAV1	HK1_SE:269	1	1
7	right	116315000	116445000	6.53623e-17	2.45542e-24	CAPZA2	HK1_SE:270	1	1
7	left	121082500	121177500	1.76904e-06	1.77798e-06	RP11-3L10.3	HK1_SE:271	1	1
7	left	156745000	157065000	0.00705768	0.000135707	RP5-1121A15.3;NOM1	HK1_SE:276	2	1
7	left	158497500	158617500	1.10548e-10	3.23728e-08	NCAPG2;AC019084.7	HK1_SE:277	2	1
18	left	3282500	3596250	1.94763e-22	2.01111e-22	RP11-838N2.5	HK1_SE:623	1	1
18	right	3600000	3985000	4.95191e-12	1.2944e-09	GAPDHP66	HK1_SE:623	1	1
18	left	12545000	12595000	8.6983e-06	0.00283956	snoU13	HK1_SE:626	1	1
9	right	14212500	14317500	3.95305e-05	4.04641e-05	RP11-120J1.1	HK1_SE:317	1	1
9	left	21330000	21797500	0.00263582	0.0025197	IFNA20P;KLHL9	HK1_SE:321	2	1
9	left	21567500	21802500	0.0152172	8.63131e-05	MIR31HG	HK1_SE:321	1	1
9	right	21579880	21681785	6.14513e-18	3.08464e-24	KHSRPP1	HK1_SE:319	1	1
9	right	21681666	21988333	0.0561509	0.00535286	CDKN2A;CDKN2B-AS1;RP11-149I2.4	HK1_SE:320	3	1
9	right	21685000	21790000	0.00184362	4.51887e-10	MTAP;RP11-145E5.5	HK1_SE:320	2	1
9	left	21815000	21870000	0.00277754	4.63848e-06	MTAP;RP11-145E5.5;AL359922.1;TUBB8P1	HK1_SE:322	4	1
9	right	21815000	21870000	0.00277754	4.63848e-06	RP11-70L8.4	HK1_SE:321	1	1
9	right	21835000	21995000	2.64187e-28	2.73247e-28	CDKN2A;CDKN2B-AS1;RP11-149I2.4;CDKN2B	HK1_SE:321	4	1
9	right	21831250	21870000	1.02166e-08	5.70715e-06	RP11-70L8.4	HK1_SE:321	1	1
9	left	74980833	75150833	5.80658e-08	5.8422e-08	ZFAND5	HK1_SE:327	1	1
9	right	95887500	96337500	0.0151319	3.32703e-05	AL353629.1;PHF2	HK1_SE:329	2	1
9	left	97557500	97629166	0.0236808	0.0238226	MIR2278	HK1_SE:330	1	1
9	left	100747500	101015000	0.000103138	5.77998e-08	ANP32B;RP11-535C21.3	HK1_SE:331	2	1
9	left	100882500	100955000	0.000184904	0.000199221	TRIM14	HK1_SE:331	1	1
9	left	110252500	110517500	3.22759e-07	5.88907e-06	KLF4	HK1_SE:332	1	1
9	left	114362500	114837500	0.00426458	0.00410906	PTGR1	HK1_SE:335	1	1
9	left	114660000	114837500	1.87228e-06	1.0673e-08	UGCG	HK1_SE:335	1	1
9	left	124320000	124737500	9.34458e-06	0.000923524	DAB2IP	HK1_SE:338	1	1
9	right	131905000	132245000	6.35062e-05	5.88633e-05	AL353803.1;RP11-65J3.14;LINC00963	HK1_SE:344	3	1
9	right	132255000	132332500	0.0137483	0.0138118	RP11-492E3.2	HK1_SE:346	1	1
9	right	136742500	136857500	1.27203e-16	1.29751e-16	VAV2	HK1_SE:348	1	1
9	right	137275000	137535000	0.000382477	0.000360785	COL5A1;COL5A1-AS1	HK1_SE:349	2	1
9	left	140195000	140505000	0.00025377	0.000288489	RP13-122B23.9;RP13-122B23.8;NRARP	HK1_SE:350	3	1
9	left	140445000	140500000	1.82341e-12	1.0212e-07	PNPLA7;AL365502.1;MRPL41	HK1_SE:350	3	1
9	left	140447500	140496500	2.60193e-11	2.69831e-11	PNPLA7;AL365502.1;MRPL41	HK1_SE:350	3	1

## Sheet: Lost_TE
chr1	gene_anchor_position	centroid1	centroid2	fdrBL	fdrDonut	genes	enhancers	number_genes	number_enhancers
22	left	17562500	18187500	0.000826294	9.49914e-07	AC006946.16;AC006946.17;IL17RA;AC006946.12	HK1_TE:51069;HK1_TE:51070	4	2
22	left	17645000	18115000	0.000284503	0.00026845	CECR5;CECR5-AS1	HK1_TE:51065;HK1_TE:51066	2	2
22	right	17645000	18115000	0.000284503	0.00026845	ATP6V1E1;BCL2L13;snoU13	HK1_TE:51059	3	1
22	right	17645000	19105000	5.86339e-05	6.53402e-06	DGCR2;AC004471.9;AC004471.10;TSSK1A;TSSK2	HK1_TE:51059	5	1
22	right	18405000	18550000	1.21827e-10	5.12654e-07	XXbac-B476C20.9;PEX26;XXbac-B476C20.11	HK1_TE:51074;HK1_TE:51075;HK1_TE:51076;HK1_TE:51077	3	4
22	right	18405833	18470833	0.00364439	0.00365081	MIR648;XXbac-B476C20.14	HK1_TE:51074;HK1_TE:51075;HK1_TE:51076;HK1_TE:51077	2	4
22	left	18497884	18550576	9.68771e-14	1.02286e-13	MICAL3;XXbac-B476C20.13;RHEBP3;XXbac-B476C20.17	HK1_TE:51089;HK1_TE:51090;HK1_TE:51091;HK1_TE:51092;HK1_TE:51093;HK1_TE:51094	4	6
22	right	18497884	18550576	9.68771e-14	1.02286e-13	XXbac-B476C20.9;PEX26;XXbac-B476C20.11	HK1_TE:51085	3	1
22	left	19047500	19097500	0.0349543	0.0353706	Y_RNA;DGCR11;AC004461.4	HK1_TE:51099;HK1_TE:51100	3	2
22	right	19047500	19097500	0.0349543	0.0353706	DGCR2;AC004471.9;TSSK1A	HK1_TE:51096;HK1_TE:51097;HK1_TE:51098	3	3
22	right	19165000	19417500	9.87889e-06	9.15597e-06	MRPL40	HK1_TE:51101;HK1_TE:51102;HK1_TE:51103;HK1_TE:51104	1	4
22	left	19467500	19562500	0.000220834	0.000230206	UFD1L;CDC45	HK1_TE:51106	2	1
22	left	19738333	19888333	3.72836e-06	3.92727e-06	TBX1	HK1_TE:51116	1	1
22	right	19738333	19888333	3.72836e-06	3.92727e-06	AC000078.5	HK1_TE:51108;HK1_TE:51109	1	2
22	left	19842500	19932500	0.00016076	0.000172498	GNB1L;C22orf29	HK1_TE:51118	2	1
22	right	19842500	19932500	0.00016076	0.000172498	TXNRD2;COMT	HK1_TE:51112;HK1_TE:51117	2	2
22	left	19958333	20011666	2.58783e-23	3.07562e-23	MIR4761	HK1_TE:51120;HK1_TE:51121	1	2
22	right	20007500	20105000	8.6409e-06	8.4562e-06	AC006547.8;TRMT2A;RANBP1;SNORA77;ZDHHC8	HK1_TE:51119;HK1_TE:51120;HK1_TE:51121	5	3
22	right	20770000	20812500	0.0462165	0.0499741	XXbac-B562F10.11	HK1_TE:51133;HK1_TE:51134	1	2
22	left	20775000	21055000	0.000334829	0.000370864	RNU6-225P	HK1_TE:51148;HK1_TE:51149	1	2
22	right	20775000	21055000	0.000334829	0.000370864	POM121L4P;BCRP5;TMEM191A	HK1_TE:51133;HK1_TE:51134	3	2
22	left	20782500	20850000	1.56416e-07	1.59886e-07	RNU6-225P;SCARF2	HK1_TE:51135	2	1
22	right	20782500	20850000	1.56416e-07	1.59886e-07	KLHL22;Y_RNA;RN7SL812P;KRT18P5;AC007731.1;MED15	HK1_TE:51133;HK1_TE:51134	6	2
22	left	20865000	21015000	2.49513e-07	5.58451e-05	KLHL22;MED15;AC007050.17	HK1_TE:51146;HK1_TE:51147	3	2
22	right	20865000	21015000	2.49513e-07	5.58451e-05	SMPD4P1;SLC9A3P2;AC007050.1;ABHD17AP4	HK1_TE:51135;HK1_TE:51136;HK1_TE:51137;HK1_TE:51138;HK1_TE:51139;HK1_TE:51140	4	6
22	left	20887500	20922500	1.01145e-06	1.19008e-09	AC007050.17	HK1_TE:51144;HK1_TE:51145	1	2
22	left	21055000	22075000	1.30846e-05	4.54569e-05	POM121L4P;BCRP5;TMEM191A	HK1_TE:51184;HK1_TE:51185	3	2
22	right	21055000	22075000	1.30846e-05	4.54569e-05	RN7SL280P	HK1_TE:51148;HK1_TE:51149	1	2
22	left	21057500	21132500	4.99832e-08	4.6024e-08	POM121L4P;BCRP5;TMEM191A	HK1_TE:51150	3	1
22	right	21057500	21132500	4.99832e-08	4.6024e-08	SERPIND1	HK1_TE:51148;HK1_TE:51149	1	2
22	right	21132500	21312500	0.000220834	8.4562e-06	RN7SL389P;XXbac-B135H6.15;AIFM3	HK1_TE:51150	3	1
22	left	21242500	21280000	7.0251e-05	0.00757792	AC007308.7	HK1_TE:51155;HK1_TE:51156;HK1_TE:51157;HK1_TE:51158	1	4
22	right	21242500	21280000	7.0251e-05	0.00757792	CRKL	HK1_TE:51151;HK1_TE:51152	1	2
22	right	21255000	21310000	3.66405e-11	3.49722e-11	RN7SL389P;XXbac-B135H6.15;AIFM3	HK1_TE:51152;HK1_TE:51153;HK1_TE:51154;HK1_TE:51155;HK1_TE:51156	3	5
22	left	21262500	41687500	0.000346893	5.16244e-06	CRKL	HK1_TE:51669;HK1_TE:51670;HK1_TE:51671;HK1_TE:51672;HK1_TE:51673;HK1_TE:51674	1	6
22	right	21262500	41687500	0.000346893	5.16244e-06	RANGAP1;AL035681.1;ZC3H7B	HK1_TE:51153;HK1_TE:51154;HK1_TE:51155;HK1_TE:51156;HK1_TE:51157	3	5
22	left	21310000	21368750	0.000251627	0.000273007	RN7SL389P;XXbac-B135H6.15;AIFM3	HK1_TE:51159	3	1
22	right	21375000	21427500	2.13925e-08	9.94583e-06	TUBA3GP	HK1_TE:51159	1	1
22	left	22065000	38575000	6.78372e-15	4.0787e-09	RN7SL280P	HK1_TE:51546;HK1_TE:51547;HK1_TE:51548	1	3
22	left	22079166	41592500	7.07237e-12	1.73134e-11	YPEL1;RN7SL280P	HK1_TE:51664;HK1_TE:51665;HK1_TE:51666	2	3
22	right	22079166	41592500	7.07237e-12	1.73134e-11	RP1-85F18.6;RP1-85F18.5;LRRC37A14P;L3MBTL2	HK1_TE:51184;HK1_TE:51185	4	2
22	left	22085000	38738333	0	2.93597e-22	YPEL1;RN7SL280P	HK1_TE:51557;HK1_TE:51558;HK1_TE:51559;HK1_TE:51560;HK1_TE:51561;HK1_TE:51562	2	6
22	right	22297500	22337500	0.000328442	0.000312848	TOP3B	HK1_TE:51188;HK1_TE:51189;HK1_TE:51190	1	3
22	right	22467500	22512500	0.000571434	0.000572385	LL22NC03-30E12.10;LL22NC03-30E12.11;IGLV4-60;LL22NC03-30E12.13;SOCS2P2	HK1_TE:51191;HK1_TE:51192	5	2
22	left	22467500	22562500	0.000935164	6.83078e-05	IGLV8-61;LL22NC03-88E1.17;ABHD17AP5	HK1_TE:51193	3	1
22	right	22467500	22562500	0.000935164	6.83078e-05	IGLV6-57;IGLVI-56;IGLV11-55;IGLV10-54;IGLVIV-53	HK1_TE:51191;HK1_TE:51192	5	2
22	right	22565000	22675000	2.65944e-06	0.0021394	IGLV5-52;IGLV1-51;IGLV1-50	HK1_TE:51193	3	1
22	left	23522500	23582500	4.02963e-13	2.7678e-10	BCR;BCRP8	HK1_TE:51204;HK1_TE:51205;HK1_TE:51206;HK1_TE:51207;HK1_TE:51208	2	5
22	left	24112500	24247500	0.000935164	0.000903509	C22orf15;CHCHD10;MMP11;AP000349.1	HK1_TE:51218;HK1_TE:51219	4	2
22	right	24225000	24412500	4.42234e-08	5.87823e-05	GSTTP2;AP000351.13;CABIN1	HK1_TE:51217	3	1
22	left	24862500	24897500	3.98199e-05	3.71444e-05	UPB1	HK1_TE:51239;HK1_TE:51240	1	2
22	right	24862500	24897500	3.98199e-05	3.71444e-05	ADORA2A-AS1;AP000355.2	HK1_TE:51233;HK1_TE:51234;HK1_TE:51235;HK1_TE:51238	2	4
22	right	25800833	25844166	0.00367096	0.00359558	CTA-246H3.12;CTA-390C10.9;IGLVIVOR22-1;CRYBB2P1	HK1_TE:51252;HK1_TE:51253	4	2
22	left	27525000	27862500	1.2263e-09	4.05354e-06	CTA-992D9.7	HK1_TE:51270;HK1_TE:51271;HK1_TE:51272	1	3
22	right	27525000	27862500	1.2263e-09	4.05354e-06	RP11-46E17.6	HK1_TE:51264;HK1_TE:51265	1	2
22	right	29282500	29466250	1.88783e-13	9.55702e-11	C22orf31;KREMEN1	HK1_TE:51285;HK1_TE:51286	2	2
22	left	29704166	29740833	6.26783e-13	6.73527e-13	GAS2L1;RASL10A;AC002059.10	HK1_TE:51288	3	1
22	right	29704166	29740833	6.26783e-13	6.73527e-13	SNORD125	HK1_TE:51287	1	1
22	left	29742500	29777500	0.00364439	0.00365081	SNORD125	HK1_TE:51289;HK1_TE:51290	1	2
22	right	29775000	30015000	0.00515142	0.00013487	RPEP4	HK1_TE:51289;HK1_TE:51290	1	2
22	left	30012500	31237500	4.62242e-05	0.000126733	NF2;RPEP4	HK1_TE:51326;HK1_TE:51327;HK1_TE:51328;HK1_TE:51329;HK1_TE:51330;HK1_TE:51331;HK1_TE:51332	2	7
22	left	30232500	30267500	2.86262e-05	3.05713e-05	ASCC2	HK1_TE:51308;HK1_TE:51309;HK1_TE:51310	1	3
22	right	30232500	30267500	2.86262e-05	3.05713e-05	MTMR3	HK1_TE:51307	1	1
22	left	30225000	30395000	0.00156985	0.00168856	ASCC2	HK1_TE:51313	1	1
22	left	30506500	30650500	1.9053e-18	1.24808e-18	CTA-85E5.7	HK1_TE:51314;HK1_TE:51315;HK1_TE:51316	1	3
22	left	30680833	30785833	3.75656e-17	3.39416e-17	GATSL3;RP1-130H16.18	HK1_TE:51323	2	1
22	right	30680833	30785833	3.75656e-17	3.39416e-17	RP1-130H16.16;SEC14L2	HK1_TE:51317;HK1_TE:51318	2	2
22	right	31037500	31312500	4.65194e-07	4.51531e-07	EIF4HP2;MORC2-AS1	HK1_TE:51325	2	1
22	right	31237500	31562500	1.88275e-07	1.76248e-07	RP3-412A9.15;MIR3928;RNF185	HK1_TE:51326;HK1_TE:51327;HK1_TE:51328;HK1_TE:51329;HK1_TE:51330;HK1_TE:51331;HK1_TE:51332	3	7
22	left	31607500	31647500	0.00172072	0.00183873	RNF185-AS1;LIMK2;RNU6-1128P	HK1_TE:51344;HK1_TE:51345;HK1_TE:51346;HK1_TE:51347;HK1_TE:51348;HK1_TE:51349;HK1_TE:51350	3	7
22	left	31890000	32345000	0.000215671	0.00298996	EIF4ENIF1;RNU6-28P;SFI1	HK1_TE:51363;HK1_TE:51364	3	2
22	left	32066250	32346250	7.5347e-06	7.73116e-05	PISD	HK1_TE:51363;HK1_TE:51364	1	2
22	left	32147500	32342500	3.58784e-09	1.85699e-07	PRR14L;DEPDC5;RN7SL20P	HK1_TE:51363;HK1_TE:51364	3	2
22	right	32270833	32344166	0.000106711	0.000100568	C22orf24;YWHAH;snoU13	HK1_TE:51359;HK1_TE:51360;HK1_TE:51361;HK1_TE:51362	3	4
22	right	32925000	33215000	0.000773838	0.000742353	Z73979.1	HK1_TE:51367;HK1_TE:51368	1	2
22	right	35987500	36027500	0.000212862	0.000214472	MB;AL049747.1	HK1_TE:51420;HK1_TE:51421;HK1_TE:51422;HK1_TE:51423;HK1_TE:51424;HK1_TE:51425	2	6
22	right	36937500	37412500	0.00296097	1.58423e-08	TEX33;TST;Y_RNA;MPST	HK1_TE:51479;HK1_TE:51480;HK1_TE:51481	4	3
22	left	37175000	37260000	0.000935164	0.000903509	IFT27	HK1_TE:51484	1	1
22	right	37175000	37260000	0.000935164	0.000903509	CTA-833B7.2;NCF4	HK1_TE:51483	2	1
22	left	37260000	37372500	0.00357121	0.0179087	CTA-833B7.2;NCF4	HK1_TE:51485	2	1
22	right	37260000	37372500	0.00357121	0.0179087	LL22NC01-81G9.3	HK1_TE:51484	1	1
22	left	37415000	37595000	0.00029126	2.91964e-06	TEX33;TST;Y_RNA;MPST	HK1_TE:51489;HK1_TE:51490;HK1_TE:51491;HK1_TE:51492	4	4
22	right	37415000	37595000	0.00029126	2.91964e-06	C1QTNF6;SSTR3	HK1_TE:51486;HK1_TE:51487	2	2
22	left	37445000	37595000	0.00029126	0.000266445	KCTD17;RN7SKP214	HK1_TE:51489;HK1_TE:51490;HK1_TE:51491;HK1_TE:51492	2	4
22	right	37445000	37595000	0.00029126	0.000266445	C1QTNF6;SSTR3	HK1_TE:51487	2	1
22	left	37585000	38145000	4.16876e-05	0.00109609	IL2RB;C1QTNF6	HK1_TE:51529;HK1_TE:51530;HK1_TE:51531;HK1_TE:51532;HK1_TE:51533;HK1_TE:51534;HK1_TE:51535	2	7
22	left	38037500	38147500	0.00125972	0.00133372	SH3BP1	HK1_TE:51529;HK1_TE:51530;HK1_TE:51531;HK1_TE:51532;HK1_TE:51533;HK1_TE:51534;HK1_TE:51535	1	7
22	left	38085500	38142500	6.32328e-07	6.60691e-07	LGALS1;NOL12;TRIOBP	HK1_TE:51529;HK1_TE:51530;HK1_TE:51531;HK1_TE:51532;HK1_TE:51533;HK1_TE:51534	3	6
22	left	38087500	38172500	1.77174e-11	6.43495e-07	NOL12;TRIOBP	HK1_TE:51535;HK1_TE:51536;HK1_TE:51537;HK1_TE:51538	2	4
22	right	38087500	38172500	1.77174e-11	6.43495e-07	snoU13	HK1_TE:51528	1	1
22	left	38290000	38333750	0.000966918	0.000973973	RNU6-900P;MICALL1	HK1_TE:51542	2	1
22	right	38290000	38333750	0.000966918	0.000973973	RP5-1039K5.17;POLR2F	HK1_TE:51539;HK1_TE:51540;HK1_TE:51541	2	3
22	left	38597500	41682500	8.7073e-05	2.60856e-06	PLA2G6;MAFF	HK1_TE:51669;HK1_TE:51670;HK1_TE:51671;HK1_TE:51672;HK1_TE:51673	2	5
22	right	38597500	41682500	8.7073e-05	2.60856e-06	RANGAP1;AL035681.1	HK1_TE:51547;HK1_TE:51548	2	2
22	left	38630000	38667500	7.68564e-05	0.00442819	AL021977.1;RP1-5O6.5;RN7SL704P	HK1_TE:51549	3	1
22	left	38667500	38722500	2.08046e-06	2.5012e-06	TMEM184B;AL020993.1	HK1_TE:51554;HK1_TE:51555;HK1_TE:51556;HK1_TE:51557;HK1_TE:51558	2	5
22	left	38667500	41602500	8.6409e-06	0.000230206	TMEM184B;AL020993.1	HK1_TE:51665;HK1_TE:51666	2	2
22	right	38667500	41602500	8.6409e-06	0.000230206	RP1-85F18.5;L3MBTL2;RP4-756G23.5	HK1_TE:51549	3	1
22	right	38712500	38792500	0.00708501	0.00103268	CSNK1E;RP3-449O17.1;RP1-5O6.4	HK1_TE:51552;HK1_TE:51553;HK1_TE:51554;HK1_TE:51555;HK1_TE:51556;HK1_TE:51557	3	6
22	right	38740000	41565000	5.93236e-16	0.000118409	RNU6-375P;RP1-85F18.6	HK1_TE:51557;HK1_TE:51558;HK1_TE:51559;HK1_TE:51560;HK1_TE:51561;HK1_TE:51562	2	6
22	right	38795000	38965000	3.25575e-05	3.05995e-05	DMC1;RP1-199H16.6	HK1_TE:51563;HK1_TE:51564	2	2
22	left	39102500	39152500	0.000966918	0.000973973	JOSD1;GTPBP1	HK1_TE:51567;HK1_TE:51568;HK1_TE:51569;HK1_TE:51570;HK1_TE:51571	2	5
22	left	39265000	39405000	2.49513e-07	3.77091e-10	CBX6	HK1_TE:51579	1	1
22	left	39460000	39502500	0.000571434	0.000572385	CTA-150C2.20	HK1_TE:51581;HK1_TE:51582	1	2
22	right	39460000	39502500	0.000571434	0.000572385	RP4-742C19.12;APOBEC3H;COX5BP7	HK1_TE:51580	3	1
22	right	39537500	39887500	1.18242e-08	8.76725e-06	RP5-1104E15.6;MIEF1	HK1_TE:51583;HK1_TE:51584	2	2
22	right	39568928	39699642	2.50341e-16	2.31377e-16	RP3-333H23.8;SNORD83B;SNORD83A	HK1_TE:51585;HK1_TE:51586;HK1_TE:51587	3	3
22	right	39572500	39640000	2.25631e-14	2.43564e-11	PDGFB	HK1_TE:51585;HK1_TE:51586;HK1_TE:51587	1	3
22	right	39607500	39647500	0.0180861	0.000973973	PDGFB;AL031590.1	HK1_TE:51588;HK1_TE:51589;HK1_TE:51590;HK1_TE:51591;HK1_TE:51592;HK1_TE:51593	2	6
22	right	39612500	39687500	1.27441e-09	2.27903e-07	RP3-333H23.8	HK1_TE:51588;HK1_TE:51589;HK1_TE:51590;HK1_TE:51591;HK1_TE:51592;HK1_TE:51593	1	6
22	left	39643333	39696666	1.91039e-10	1.99191e-10	PDGFB;AL031590.1	HK1_TE:51597;HK1_TE:51598;HK1_TE:51599;HK1_TE:51600;HK1_TE:51601	2	5
22	right	39643333	39696666	1.91039e-10	1.99191e-10	RP3-333H23.8;SNORD83B;SNORD83A	HK1_TE:51594	3	1
22	right	39711250	39922500	2.80551e-06	2.47389e-11	ATF4;RPS19BP1	HK1_TE:51600;HK1_TE:51601	2	2
22	right	39717500	39897500	0.00107522	0.00103268	MIEF1	HK1_TE:51600;HK1_TE:51601	1	2
22	right	39835000	39890000	0.0319517	0.0338032	MIEF1	HK1_TE:51603;HK1_TE:51604	1	2
22	left	40137500	40412500	0.000826294	0.000874162	RP1-172B20.6	HK1_TE:51612	1	1
22	left	40437500	41037500	0.000100895	2.68361e-07	RP3-496C20.1;TNRC6B	HK1_TE:51644;HK1_TE:51645;HK1_TE:51646;HK1_TE:51647;HK1_TE:51648;HK1_TE:51649	2	6
22	right	40595000	40935000	2.64376e-06	2.89693e-06	AL031594.1	HK1_TE:51613	1	1
22	right	40892500	41047500	0.00673353	1.26465e-05	MKL1	HK1_TE:51623;HK1_TE:51624;HK1_TE:51625;HK1_TE:51626	1	4
22	left	40937500	40995000	0.00111026	0.0010752	AL031594.1	HK1_TE:51633;HK1_TE:51634;HK1_TE:51635;HK1_TE:51636;HK1_TE:51637;HK1_TE:51638;HK1_TE:51639;HK1_TE:51640	1	8
22	right	40937500	40995000	0.00111026	0.0010752	RPL4P6	HK1_TE:51627;HK1_TE:51628;HK1_TE:51629;HK1_TE:51630;HK1_TE:51631	1	5
22	left	41047500	41117500	1.27441e-09	1.25564e-09	MKL1	HK1_TE:51650;HK1_TE:51651;HK1_TE:51652;HK1_TE:51653;HK1_TE:51654	1	5
22	left	41592500	41685000	0.00203694	0.00199217	RP1-85F18.6;RP1-85F18.5;LRRC37A14P;L3MBTL2	HK1_TE:51669;HK1_TE:51670;HK1_TE:51671;HK1_TE:51672;HK1_TE:51673	4	5
22	right	41592500	41685000	0.00203694	0.00199217	RANGAP1;AL035681.1;ZC3H7B	HK1_TE:51664;HK1_TE:51665;HK1_TE:51666	3	3
22	left	41687500	42237500	0.000369432	0.000448985	RANGAP1;AL035681.1;ZC3H7B	HK1_TE:51686;HK1_TE:51687;HK1_TE:51688;HK1_TE:51689;HK1_TE:51690;HK1_TE:51691	3	6
22	right	41687500	42237500	0.000369432	0.000448985	RP5-821D11.7;SREBF2	HK1_TE:51669;HK1_TE:51670;HK1_TE:51671;HK1_TE:51672;HK1_TE:51673;HK1_TE:51674	2	6
22	right	41682500	42017500	1.47558e-08	7.14901e-11	DESI1;XRCC6	HK1_TE:51669;HK1_TE:51670;HK1_TE:51671;HK1_TE:51672;HK1_TE:51673	2	5
22	left	41787500	42237500	2.70439e-06	0.00117732	RNU6-495P	HK1_TE:51686;HK1_TE:51687;HK1_TE:51688;HK1_TE:51689;HK1_TE:51690;HK1_TE:51691	1	6
22	left	41842500	42227500	2.81287e-07	6.83078e-05	TOB2	HK1_TE:51686;HK1_TE:51687;HK1_TE:51688;HK1_TE:51689;HK1_TE:51690	1	5
22	left	41867500	41910000	4.49396e-06	4.86523e-06	PHF5A;ACO2	HK1_TE:51677;HK1_TE:51678;HK1_TE:51679	2	3
22	left	42112500	42837500	0.00204774	0.00216178	HMGN2P10;RNU6ATAC22P	HK1_TE:51707;HK1_TE:51708	2	2
22	right	42417500	42487500	4.85931e-05	0.00199217	SMDT1;NDUFA6;RP1-257I20.14;NDUFA6-AS1	HK1_TE:51697	4	1
22	left	42487500	42552500	4.37449e-06	4.71409e-06	SMDT1;NDUFA6;RP1-257I20.14;NDUFA6-AS1	HK1_TE:51698;HK1_TE:51699;HK1_TE:51700	4	3
22	left	42487500	42832500	1.87481e-08	1.50328e-06	SMDT1;NDUFA6;RP1-257I20.14;NDUFA6-AS1	HK1_TE:51707;HK1_TE:51708	4	2
22	right	42566500	42834500	1.27911e-09	1.20577e-09	NFAM1;CTA-126B4.7	HK1_TE:51698;HK1_TE:51699;HK1_TE:51700	2	3
22	right	42567500	42662500	0.000366955	0.000394918	Z83851.3;Z83851.4;CTA-989H11.1	HK1_TE:51698;HK1_TE:51699;HK1_TE:51700	3	3
22	left	43017500	43067500	7.27511e-07	6.87811e-07	POLDIP3;RNU12	HK1_TE:51715	2	1
22	left	43035500	43141500	1.84796e-05	2.00465e-05	CYB5R3;ATP5L2	HK1_TE:51720;HK1_TE:51721;HK1_TE:51722;HK1_TE:51723;HK1_TE:51724;HK1_TE:51725;HK1_TE:51726;HK1_TE:51727	2	8
22	left	43177500	43215000	4.49396e-06	4.86523e-06	RPL5P34;GOLGA2P4	HK1_TE:51732;HK1_TE:51733;HK1_TE:51734	2	3
22	left	43252500	43462500	6.92731e-05	7.43645e-05	ARFGAP3;AL049758.2	HK1_TE:51749;HK1_TE:51750	2	2
22	left	43250000	43487500	0.00016076	0.000172498	ARFGAP3;AL049758.2	HK1_TE:51751	2	1
22	right	43250000	43487500	0.00016076	0.000172498	TTLL1;AL022237.3	HK1_TE:51735;HK1_TE:51736;HK1_TE:51737	2	3
22	left	43397500	43462500	3.74169e-05	3.6184e-05	PACSIN2	HK1_TE:51749;HK1_TE:51750	1	2
22	left	43924166	44022500	2.86262e-05	3.05713e-05	EFCAB6-AS1	HK1_TE:51771;HK1_TE:51772	1	2
22	left	44705000	44845000	1.50601e-05	1.61744e-05	KIAA1644	HK1_TE:51779	1	1
22	right	44705000	44845000	1.50601e-05	1.61744e-05	CTA-397C4.2	HK1_TE:51777	1	1
22	right	44707500	44757500	4.3111e-08	4.70336e-08	RP1-32I10.10	HK1_TE:51777	1	1
22	left	44755000	45465000	0.000718819	6.10143e-05	RP1-32I10.10	HK1_TE:51803;HK1_TE:51804	1	2
22	left	44757500	45147500	0.000148601	0.000141293	RP1-32I10.10	HK1_TE:51797;HK1_TE:51798	1	2
22	left	44847500	44887500	0.000966918	0.000973973	CTA-397C4.2	HK1_TE:51780;HK1_TE:51781;HK1_TE:51782;HK1_TE:51783;HK1_TE:51784	1	5
22	right	44847500	44887500	0.000966918	0.000973973	MRPS18CP6;LDOC1L	HK1_TE:51779	2	1
22	left	44895000	45085000	0.00262112	0.00248955	LDOC1L	HK1_TE:51786;HK1_TE:51787;HK1_TE:51788;HK1_TE:51789;HK1_TE:51790;HK1_TE:51791;HK1_TE:51792;HK1_TE:51793	1	8
22	right	44895000	45085000	0.00262112	0.00248955	PRR5-ARHGAP8;ARHGAP8	HK1_TE:51782;HK1_TE:51783;HK1_TE:51784	2	3
22	left	45089264	45141617	5.25564e-12	2.97357e-16	PRR5-ARHGAP8;ARHGAP8	HK1_TE:51797;HK1_TE:51798	2	2
22	right	45152500	45557500	0.0025542	0.000236297	CTA-217C2.1;CTA-217C2.2;NUP50	HK1_TE:51797;HK1_TE:51798	3	2
22	right	45467500	45642500	0.000258212	0.00251694	KIAA0930	HK1_TE:51803;HK1_TE:51804	1	2
22	left	45597500	45640000	2.86262e-05	3.05713e-05	MIR1249	HK1_TE:51808;HK1_TE:51809;HK1_TE:51810;HK1_TE:51811;HK1_TE:51812	1	5
22	left	46175000	46225000	2.76276e-07	3.12558e-07	RP1-37M3.8	HK1_TE:51824;HK1_TE:51825;HK1_TE:51826	1	3
22	right	46260000	46372500	1.88783e-13	1.69412e-13	WNT7B;CR536603.1	HK1_TE:51827	2	1
22	right	46404166	46473333	2.73867e-17	2.84242e-17	RP6-109B7.4;MIR3619	HK1_TE:51829	2	1
22	right	46435000	46695000	1.14447e-10	9.32258e-06	GTSE1	HK1_TE:51830;HK1_TE:51831;HK1_TE:51832	1	3
22	right	46757500	46937954	1.61241e-15	1.45557e-15	CELSR1;RP3-439F8.1	HK1_TE:51836;HK1_TE:51837;HK1_TE:51838	2	3
22	right	46912500	46972500	0.000571434	0.000572385	GRAMD4	HK1_TE:51842;HK1_TE:51843;HK1_TE:51844;HK1_TE:51845;HK1_TE:51846;HK1_TE:51847;HK1_TE:51848;HK1_TE:51849;HK1_TE:51850;HK1_TE:51851	1	10
22	right	50220000	50312500	0.0156625	0.002365	ALG12;CRELD2	HK1_TE:51891;HK1_TE:51892	2	2
22	right	50587500	50622500	0.000543794	0.000569427	PANX2;TRABD;RP3-402G11.25	HK1_TE:51902	3	1
22	left	50682500	50767500	2.62077e-10	3.85464e-13	TUBGCP6;HDAC10	HK1_TE:51908;HK1_TE:51909;HK1_TE:51910	2	3
22	left	50699687	50772812	2.50341e-16	5.51528e-13	HDAC10;MAPK12;MAPK11;AL022328.1	HK1_TE:51909;HK1_TE:51910	4	2
22	left	50742500	50782500	1.27441e-09	1.25564e-09	PLXNB2;XX-C283C717.1	HK1_TE:51909;HK1_TE:51910	2	2
22	right	50742500	50782500	1.27441e-09	1.25564e-09	PPP6R2	HK1_TE:51906;HK1_TE:51907;HK1_TE:51908	1	3
22	right	51065833	51129166	0.000258212	0.000236297	RNU6-409P	HK1_TE:51916	1	1
2	right	185000	265000	0.0175882	0.0184323	SH3YL1;ACP1	HK1_TE:5180	2	1
2	left	265000	395000	0.00262112	0.00248955	SH3YL1;ACP1	HK1_TE:5182	2	1
2	left	392500	427500	1.71532e-08	7.09813e-07	AC105393.1	HK1_TE:5183;HK1_TE:5184	1	2
2	right	392500	427500	1.71532e-08	7.09813e-07	AC105393.2	HK1_TE:5182	1	1
2	left	1582500	1632500	0.024362	0.00302692	AC141930.2	HK1_TE:5201;HK1_TE:5202;HK1_TE:5203;HK1_TE:5204;HK1_TE:5205;HK1_TE:5206;HK1_TE:5207;HK1_TE:5208	1	8
2	right	1582500	1632500	0.024362	0.00302692	AC144450.1;AC144450.2	HK1_TE:5192;HK1_TE:5193;HK1_TE:5194;HK1_TE:5195;HK1_TE:5196	2	5
2	left	1582500	1677500	3.33902e-05	0.000572385	AC141930.2	HK1_TE:5209;HK1_TE:5210	1	2
2	left	1637500	1677500	2.13594e-05	2.20414e-05	AC144450.1;AC144450.2	HK1_TE:5209;HK1_TE:5210	2	2
2	right	1677500	1755833	1.46905e-06	1.7747e-08	PXDN	HK1_TE:5209;HK1_TE:5210	1	2
2	left	3607500	3690000	0.00125972	0.00133372	RP13-512J5.1;RNASEH1;AC108488.3	HK1_TE:5218	3	1
2	right	3622500	3702500	0.000212862	9.15597e-06	ALLC	HK1_TE:5212	1	1
2	right	9012500	9282500	7.53704e-05	6.83078e-05	RP11-734K21.4	HK1_TE:5229	1	1
2	left	9282500	9462500	0.000571434	0.000572385	RP11-734K21.4	HK1_TE:5255	1	1
2	left	9772500	9847500	6.32328e-07	7.39759e-05	YWHAQ;RP11-521D12.1	HK1_TE:5279;HK1_TE:5280;HK1_TE:5281;HK1_TE:5282;HK1_TE:5283	2	5
2	left	9775000	10262500	8.71216e-05	7.72895e-05	YWHAQ;RP11-521D12.1	HK1_TE:5303;HK1_TE:5304	2	2
2	right	9775000	10262500	8.71216e-05	7.72895e-05	RP11-254F7.4;RRM2	HK1_TE:5271;HK1_TE:5272;HK1_TE:5273;HK1_TE:5274	2	4
2	left	9793500	9841500	3.62771e-05	3.9432e-05	RP11-521D12.1	HK1_TE:5279;HK1_TE:5280;HK1_TE:5281;HK1_TE:5282;HK1_TE:5283	1	5
2	right	9846250	9891250	2.47211e-07	2.60004e-07	RNU4-73P;RP11-521D12.4	HK1_TE:5279;HK1_TE:5280;HK1_TE:5281;HK1_TE:5282;HK1_TE:5283	2	5
2	left	9915000	10185000	9.34629e-08	1.09578e-10	RP11-521D12.5	HK1_TE:5302	1	1
2	right	9915000	10185000	9.34629e-08	1.09578e-10	RP11-254F7.2;KLF11;RP11-254F7.3	HK1_TE:5286;HK1_TE:5287;HK1_TE:5288;HK1_TE:5289;HK1_TE:5290	3	5
2	right	10262500	10437500	8.6409e-06	8.4562e-06	SNORA51;HPCAL1	HK1_TE:5303;HK1_TE:5304	2	2
2	left	10430833	10548333	9.68569e-11	9.55702e-11	RN7SL66P;SNORA51;HPCAL1	HK1_TE:5307;HK1_TE:5308;HK1_TE:5309;HK1_TE:5310;HK1_TE:5311	3	5
2	left	10588611	10801944	2.35943e-18	2.63062e-22	ODC1;SNORA80B;RP11-320M2.1;AC007249.3	HK1_TE:5328;HK1_TE:5329;HK1_TE:5330;HK1_TE:5331;HK1_TE:5332;HK1_TE:5333	4	6
2	left	10589500	10722500	6.88926e-08	6.46816e-08	ODC1;SNORA80B;RP11-320M2.1;AC007249.3	HK1_TE:5322;HK1_TE:5323;HK1_TE:5324;HK1_TE:5325;HK1_TE:5326;HK1_TE:5327	4	6
2	right	10589500	10722500	6.88926e-08	6.46816e-08	AC092687.5	HK1_TE:5312;HK1_TE:5313	1	2
2	right	10635000	10725000	8.7073e-05	0.00183873	AC092687.5	HK1_TE:5314;HK1_TE:5315;HK1_TE:5316	1	3
2	right	10677500	10722500	3.83573e-06	0.000294535	AC092687.5	HK1_TE:5319;HK1_TE:5320;HK1_TE:5321	1	3
2	left	10734166	10792500	1.78631e-05	9.92731e-08	AC092687.5	HK1_TE:5328;HK1_TE:5329;HK1_TE:5330;HK1_TE:5331;HK1_TE:5332;HK1_TE:5333	1	6
2	left	14427500	14967500	0.00221918	0.00220262	RNU6-1288P	HK1_TE:5417	1	1
2	right	14667500	14772500	2.61502e-05	2.58117e-05	FAM84A;AC011897.1	HK1_TE:5396;HK1_TE:5397;HK1_TE:5398;HK1_TE:5399;HK1_TE:5400;HK1_TE:5401;HK1_TE:5402;HK1_TE:5403	2	8
2	left	14775000	14965000	0.00025466	0.000249467	FAM84A;AC011897.1	HK1_TE:5417	2	1
2	right	14775000	15045000	0.00355792	5.26111e-05	AC068286.1	HK1_TE:5411	1	1
2	right	15737500	17937500	0.0043978	9.63005e-06	GEN1	HK1_TE:5423	1	1
2	right	17622500	17722500	7.27511e-07	6.87811e-07	VSNL1	HK1_TE:5442;HK1_TE:5443;HK1_TE:5444;HK1_TE:5445	1	4
2	right	17725000	17935000	2.50392e-05	0.00193308	GEN1	HK1_TE:5451;HK1_TE:5452	1	2
2	left	17726500	17819500	1.25256e-09	1.19008e-09	VSNL1	HK1_TE:5462;HK1_TE:5463;HK1_TE:5464	1	3
2	left	18725000	19550000	1.33372e-09	0.000448985	RP11-111J6.2	HK1_TE:5496;HK1_TE:5497;HK1_TE:5498	1	3
2	right	20310000	20345000	0.000805646	0.000868542	AC098828.3	HK1_TE:5521;HK1_TE:5522;HK1_TE:5523	1	3
2	right	20432500	20777500	2.36306e-07	1.66382e-06	RP11-130L8.2;HS1BP3-IT1	HK1_TE:5527;HK1_TE:5528;HK1_TE:5529;HK1_TE:5530	2	4
2	right	20560000	20780000	0.000624381	0.000579839	RP11-130L8.2;HS1BP3-IT1	HK1_TE:5533;HK1_TE:5534;HK1_TE:5535;HK1_TE:5536;HK1_TE:5537;HK1_TE:5538;HK1_TE:5539;HK1_TE:5540	2	8
2	right	20714166	20780000	2.10534e-07	2.20414e-05	RP11-130L8.2;HS1BP3-IT1	HK1_TE:5549;HK1_TE:5550;HK1_TE:5551	2	3
2	left	20712500	20832500	8.7073e-05	9.07266e-05	AC012065.4	HK1_TE:5552;HK1_TE:5553;HK1_TE:5554	1	3
2	left	20797500	20832500	6.92731e-05	0.00191662	RP11-130L8.2;HS1BP3-IT1;AC012065.5	HK1_TE:5552;HK1_TE:5553;HK1_TE:5554	3	3
2	left	23605000	23710000	0.00025018	0.000266827	AC012506.4;KLHL29	HK1_TE:5560;HK1_TE:5561	2	2
2	right	24037500	24300000	6.92105e-08	6.17865e-08	SF3B14;FAM228B;TP53I3	HK1_TE:5571;HK1_TE:5572	3	2
2	right	24154166	24298333	0.000477668	1.22662e-05	SF3B14;FAM228B;TP53I3	HK1_TE:5575	3	1
2	right	24240000	24297500	0.000154959	0.000149481	SF3B14;FAM228B;TP53I3	HK1_TE:5576;HK1_TE:5577;HK1_TE:5578;HK1_TE:5579	3	4
2	left	24715000	25017500	0.00357121	0.00344477	NCOA1	HK1_TE:5582	1	1
2	right	24715000	25017500	0.00357121	0.00344477	PTRHD1;CENPO	HK1_TE:5580;HK1_TE:5581	2	2
2	right	25017500	25142500	6.88926e-08	5.83238e-10	ADCY3	HK1_TE:5582	1	1
2	left	25587500	25747500	0.000935164	6.83078e-05	AC012074.2;AC012074.1	HK1_TE:5586;HK1_TE:5587	2	2
2	right	25837500	25882500	0.000589747	0.000571758	DTNB	HK1_TE:5588	1	1
2	left	25897500	25942500	2.48316e-08	2.66548e-08	DTNB	HK1_TE:5591;HK1_TE:5592;HK1_TE:5593;HK1_TE:5594	1	4
2	left	26112500	26987500	0.00304999	0.00452767	ASXL2;AC064847.4	HK1_TE:5643;HK1_TE:5644;HK1_TE:5645;HK1_TE:5646;HK1_TE:5647;HK1_TE:5648;HK1_TE:5649	2	7
2	left	26105000	26245000	3.94776e-09	3.92727e-06	ASXL2;AC064847.4	HK1_TE:5605;HK1_TE:5606;HK1_TE:5607;HK1_TE:5608;HK1_TE:5609;HK1_TE:5610;HK1_TE:5611	2	7
2	left	26105000	26575000	0.000143315	0.00366416	ASXL2;AC064847.4	HK1_TE:5626;HK1_TE:5627;HK1_TE:5628;HK1_TE:5629	2	4
2	left	26257500	26300000	0.00190502	0.00191662	AC013449.1;RAB10;RNU6-942P	HK1_TE:5614;HK1_TE:5615	3	2
2	left	26465000	26515000	5.93617e-08	6.52042e-08	HADHA;HADHB	HK1_TE:5621;HK1_TE:5622;HK1_TE:5624;HK1_TE:5625	2	4
2	left	26572500	26982500	0.00642573	0.0234562	GPR113	HK1_TE:5643;HK1_TE:5644;HK1_TE:5645;HK1_TE:5646;HK1_TE:5647;HK1_TE:5648	1	6
2	right	26572500	26982500	0.00642573	0.0234562	SLC35F6;CENPA	HK1_TE:5626;HK1_TE:5627;HK1_TE:5628;HK1_TE:5629	2	4
2	right	27307500	27357500	8.7073e-05	9.07266e-05	ABHD1;PREB;C2orf53;TCF23	HK1_TE:5653	4	1
2	left	27440000	27527500	0.000543794	0.000569427	SLC5A6;ATRAID;CAD	HK1_TE:5654;HK1_TE:5655;HK1_TE:5656;HK1_TE:5657	3	4
2	left	27712500	27797500	0.0035246	0.00376037	IFT172;RNU6-986P;FNDC4;GCKR	HK1_TE:5666;HK1_TE:5667;HK1_TE:5668;HK1_TE:5669	4	4
2	left	27852500	27907500	0.00111026	2.20414e-05	CCDC121;GPN1;SNORA36	HK1_TE:5680	3	1
2	left	27935000	28617500	3.75656e-17	3.39416e-17	AC074091.13	HK1_TE:5736;HK1_TE:5737;HK1_TE:5738;HK1_TE:5739;HK1_TE:5740;HK1_TE:5741	1	6
2	right	27935000	28617500	3.75656e-17	3.39416e-17	AC104695.3;FOSL2;RP11-373D23.2	HK1_TE:5681;HK1_TE:5682;HK1_TE:5683;HK1_TE:5684;HK1_TE:5685;HK1_TE:5686;HK1_TE:5687;HK1_TE:5688;HK1_TE:5689	3	9
2	left	27927500	28497500	0.000593174	0.000582031	AC074091.13	HK1_TE:5723;HK1_TE:5724;HK1_TE:5725;HK1_TE:5726;HK1_TE:5727;HK1_TE:5728	1	6
2	right	28025833	28615833	2.24239e-14	5.38479e-12	AC104695.3;FOSL2;RP11-373D23.2	HK1_TE:5690;HK1_TE:5691;HK1_TE:5692;HK1_TE:5693;HK1_TE:5694;HK1_TE:5695;HK1_TE:5696	3	7
2	right	28619642	28673928	3.98199e-05	3.71444e-05	AC104695.4;PLB1;SNRPGP7	HK1_TE:5737;HK1_TE:5738;HK1_TE:5739;HK1_TE:5740;HK1_TE:5741	3	5
2	left	28682500	28732500	6.92731e-05	7.43645e-05	AC104695.4;PLB1;SNRPGP7	HK1_TE:5746;HK1_TE:5747;HK1_TE:5748;HK1_TE:5749	3	4
2	right	28797500	29117500	6.88926e-08	6.46816e-08	WDR43	HK1_TE:5753;HK1_TE:5754;HK1_TE:5755	1	3
2	right	28937500	28972500	2.13594e-05	2.20414e-05	AC097724.3;PPP1CB	HK1_TE:5758;HK1_TE:5759;HK1_TE:5760;HK1_TE:5761;HK1_TE:5762	2	5
2	right	29337500	30362500	0.00310653	3.05032e-10	AC016907.3;YPEL5	HK1_TE:5771;HK1_TE:5772;HK1_TE:5773;HK1_TE:5774;HK1_TE:5775;HK1_TE:5776;HK1_TE:5777;HK1_TE:5778;HK1_TE:5779	2	9
2	right	29337500	30487500	0.000176613	0.00804045	AC104698.1	HK1_TE:5771;HK1_TE:5772;HK1_TE:5773;HK1_TE:5774;HK1_TE:5775;HK1_TE:5776;HK1_TE:5777;HK1_TE:5778;HK1_TE:5779	1	9
2	left	30370000	30497500	0.00252149	0.000290788	AC016907.3;YPEL5	HK1_TE:5805	2	1
2	left	30457500	30497500	3.10549e-07	5.94204e-10	LBH	HK1_TE:5805	1	1
2	left	31455000	31560000	0.00125972	7.54171e-05	CAPN14;RNA5SP90;EHD3	HK1_TE:5810;HK1_TE:5811;HK1_TE:5812	3	3
2	left	32390000	32505000	0.0334508	0.0366353	RP11-563N4.1;SLC30A6	HK1_TE:5828;HK1_TE:5829;HK1_TE:5830	2	3
2	right	32505000	32582500	4.93848e-08	4.99934e-08	BIRC6	HK1_TE:5828;HK1_TE:5829;HK1_TE:5830	1	3
2	left	33295000	33502500	2.80551e-06	7.54171e-05	AL133244.1	HK1_TE:5842;HK1_TE:5843	1	2
2	right	33295000	33502500	2.80551e-06	7.54171e-05	RNA5SP91	HK1_TE:5837;HK1_TE:5838;HK1_TE:5839	1	3
2	left	36582500	36887500	2.10182e-05	0.0036095	RP11-490M8.1;CRIM1	HK1_TE:5874	2	1
2	left	36595000	36667500	8.7073e-05	0.00183873	RP11-490M8.1;CRIM1	HK1_TE:5856;HK1_TE:5857	2	2
2	right	37192500	37312500	0.00172072	9.07266e-05	HEATR5B;GPATCH11	HK1_TE:5883	2	1
2	right	37622500	38502500	4.66578e-05	6.25913e-05	GAPDHP25	HK1_TE:5897;HK1_TE:5898	1	2
2	right	37770000	37815000	0.0115426	0.0118064	AC006369.2	HK1_TE:5901;HK1_TE:5902;HK1_TE:5903	1	3
2	right	37900000	38057500	1.62876e-06	1.48427e-08	AC010878.3	HK1_TE:5914;HK1_TE:5916;HK1_TE:5917;HK1_TE:5918	1	4
2	right	38212500	38737500	0.000295223	0.000306966	AC016995.3	HK1_TE:5930;HK1_TE:5931	1	2
2	right	38210000	38342500	2.27836e-13	1.93217e-13	CYP1B1	HK1_TE:5930;HK1_TE:5931	1	2
2	left	38302500	38342500	0.000966918	0.000973973	RMDN2-AS1;CYP1B1-AS1	HK1_TE:5949;HK1_TE:5950;HK1_TE:5951;HK1_TE:5952;HK1_TE:5953;HK1_TE:5954;HK1_TE:5955;HK1_TE:5956;HK1_TE:5957	2	9
2	right	38302500	38342500	0.000966918	0.000973973	CYP1B1	HK1_TE:5940;HK1_TE:5941;HK1_TE:5942;HK1_TE:5943;HK1_TE:5944	1	5
2	left	38345000	38502500	6.37632e-10	3.65969e-12	CYP1B1	HK1_TE:5960;HK1_TE:5961;HK1_TE:5962;HK1_TE:5963	1	4
2	right	38345000	38502500	6.37632e-10	3.65969e-12	GAPDHP25	HK1_TE:5949;HK1_TE:5950;HK1_TE:5951;HK1_TE:5952;HK1_TE:5953;HK1_TE:5954;HK1_TE:5955;HK1_TE:5956;HK1_TE:5957	1	9
2	left	38600000	38687500	2.27997e-11	2.43564e-11	ATL2	HK1_TE:5973	1	1
2	left	38602500	38742500	1.87481e-08	7.43645e-05	ATL2	HK1_TE:5975;HK1_TE:5976;HK1_TE:5977	1	3
2	left	38767500	38957500	1.77174e-11	3.61383e-14	RP11-541E12.1	HK1_TE:5981	1	1
2	left	38819166	38953333	2.10534e-07	2.27903e-07	HNRNPLL;AC011247.3	HK1_TE:5981	2	1
2	right	39174166	39452500	5.56385e-06	4.98605e-06	CDKL4	HK1_TE:5993	1	1
2	left	39607500	39662500	0.000966918	0.000973973	RNU6-1185P	HK1_TE:6005;HK1_TE:6007;HK1_TE:6008	1	3
2	right	39607500	39662500	0.000966918	0.000973973	MAP4K3;AC007246.3	HK1_TE:5997;HK1_TE:5998;HK1_TE:5999	2	3
2	right	40717500	40987500	2.06874e-05	0.000236297	AC007317.1	HK1_TE:6059;HK1_TE:6060	1	2
2	left	42087500	42575000	7.26734e-07	4.98527e-11	AC009413.2;Y_RNA;RNU4-63P	HK1_TE:6112;HK1_TE:6113	3	2
2	left	42397500	42587500	2.69181e-06	2.60856e-06	AC083949.1;EML4	HK1_TE:6114	2	1
2	right	42587500	43037500	2.06874e-05	1.34484e-06	FTOP1	HK1_TE:6114	1	1
2	left	42725000	43035000	0.00504808	0.00026845	KCNG3;MTA3	HK1_TE:6119	2	1
2	right	43215833	43309166	1.88783e-13	9.55702e-11	RNU6-242P	HK1_TE:6129;HK1_TE:6130;HK1_TE:6131;HK1_TE:6132;HK1_TE:6133;HK1_TE:6134;HK1_TE:6135;HK1_TE:6136	1	8
2	left	43455000	43767500	0.00808291	6.83078e-05	ZFP36L2;AC010883.5	HK1_TE:6181;HK1_TE:6182	2	2
2	left	43458750	43711250	8.73981e-13	1.16753e-15	ZFP36L2;AC010883.5	HK1_TE:6171;HK1_TE:6172;HK1_TE:6173;HK1_TE:6174;HK1_TE:6175;HK1_TE:6176;HK1_TE:6177;HK1_TE:6178;HK1_TE:6179	2	9
2	left	43812500	44200000	0.000543288	8.297e-12	THADA	HK1_TE:6187	1	1
2	right	44312500	44467500	9.87889e-06	0.000214472	snoU13	HK1_TE:6189	1	1
2	left	44462500	44517500	9.87889e-06	0.000214472	snoU13	HK1_TE:6191	1	1
2	right	44462500	44517500	9.87889e-06	0.000214472	SLC3A1	HK1_TE:6190	1	1
2	left	45837500	45877500	0.00836852	7.63019e-05	SRBD1	HK1_TE:6205	1	1
2	right	45837500	45877500	0.00836852	7.63019e-05	PRKCE	HK1_TE:6203;HK1_TE:6204	1	2
2	right	45877500	45912500	1.86186e-07	1.7684e-07	U51244.2	HK1_TE:6205	1	1
2	right	46192500	46395000	0.000840034	0.000770561	AC017006.3	HK1_TE:6220;HK1_TE:6221;HK1_TE:6222;HK1_TE:6223;HK1_TE:6224	1	5
2	left	46237500	46525000	4.27631e-06	6.46816e-08	AC017078.1	HK1_TE:6234;HK1_TE:6235;HK1_TE:6236;HK1_TE:6237	1	4
2	left	46292500	46520833	2.69181e-06	9.07266e-05	AC017006.2	HK1_TE:6234;HK1_TE:6235	1	2
2	right	46292500	46520833	2.69181e-06	9.07266e-05	EPAS1	HK1_TE:6225;HK1_TE:6226;HK1_TE:6227	1	3
2	right	46345000	46395000	1.09718e-12	2.02405e-07	AC017006.3	HK1_TE:6230;HK1_TE:6231	1	2
2	right	46605000	46685000	0.000180364	0.000193614	RN7SL817P	HK1_TE:6245;HK1_TE:6246	1	2
2	right	46872500	46927500	0.000462426	0.00049863	SOCS5	HK1_TE:6255;HK1_TE:6256;HK1_TE:6257	1	3
2	right	46874166	47111944	1.77174e-11	1.63551e-11	AC016722.4	HK1_TE:6255;HK1_TE:6256;HK1_TE:6257	1	3
2	left	46927500	46977500	0.000837306	0.000888864	SOCS5	HK1_TE:6260	1	1
2	right	47027500	47086785	7.81402e-11	3.69574e-08	AC016722.3	HK1_TE:6262;HK1_TE:6263;HK1_TE:6264;HK1_TE:6265	1	4
2	right	47145000	47545000	0.000180364	1.69251e-10	BCYRN1	HK1_TE:6268;HK1_TE:6269;HK1_TE:6270;HK1_TE:6271;HK1_TE:6272;HK1_TE:6273	1	6
2	right	47212500	47260000	0.00329911	2.00465e-05	AC093732.1	HK1_TE:6277;HK1_TE:6278;HK1_TE:6279	1	3
2	left	47262500	47300000	3.57316e-11	3.94221e-11	AC093732.1	HK1_TE:6280;HK1_TE:6281;HK1_TE:6282;HK1_TE:6283;HK1_TE:6284	1	5
2	left	48831250	48956250	7.65377e-24	3.60697e-28	GTF2A1L	HK1_TE:6326;HK1_TE:6327	1	2
2	right	53635000	53702500	1.56707e-06	1.64114e-06	SCARNA16;AC069157.1	HK1_TE:6343;HK1_TE:6344;HK1_TE:6345;HK1_TE:6346	2	4
2	right	53740000	53787500	0.00283092	0.00302692	RNU6-997P	HK1_TE:6349;HK1_TE:6350	1	2
2	right	54342500	54557500	0.000935164	0.000903509	C2orf73	HK1_TE:6369;HK1_TE:6370;HK1_TE:6371	1	3
2	left	54752500	54932500	7.73158e-08	2.60212e-06	AC092839.1	HK1_TE:6380	1	1
2	left	54955000	55055000	4.37449e-06	4.71409e-06	EML6	HK1_TE:6386	1	1
2	left	54952500	55457500	5.56385e-06	2.03834e-07	EML6	HK1_TE:6399	1	1
2	right	54952500	55457500	5.56385e-06	2.03834e-07	CLHC1;AC012358.7;AC012358.4;RPS27A	HK1_TE:6381;HK1_TE:6382	4	2
2	right	55455000	55845000	0.00804088	5.73174e-07	SMEK2;RP11-554J4.1	HK1_TE:6399	2	1
2	right	56115000	56150000	2.14326e-06	2.32365e-06	EFEMP1	HK1_TE:6414;HK1_TE:6415;HK1_TE:6416;HK1_TE:6417;HK1_TE:6418;HK1_TE:6419;HK1_TE:6420	1	7
2	left	56147500	56230833	0.00016076	0.000172498	EFEMP1	HK1_TE:6425;HK1_TE:6426	1	2
2	right	56187500	56237500	0.000477668	0.000480229	MIR216B	HK1_TE:6421;HK1_TE:6422;HK1_TE:6423;HK1_TE:6424	1	4
2	right	60940000	60987500	0.000366955	0.000394918	PAPOLG	HK1_TE:6457;HK1_TE:6458	1	2
2	right	61112500	61412500	1.4115e-06	0.00216178	AHSA2;RP11-493E12.2	HK1_TE:6459;HK1_TE:6460	2	2
2	left	61111250	61237500	1.56416e-07	1.59886e-07	AC010733.4;REL	HK1_TE:6462;HK1_TE:6463;HK1_TE:6464	2	3
2	right	61111250	61237500	1.56416e-07	1.59886e-07	PUS10;RNA5SP95;PEX13	HK1_TE:6459;HK1_TE:6460	3	2
2	right	61245000	61375000	0.00481181	5.58451e-05	AC016747.3;C2orf74;RP11-493E12.1	HK1_TE:6462;HK1_TE:6463;HK1_TE:6464	3	3
2	right	61242500	61402500	7.51726e-11	7.14901e-11	RP11-493E12.1;AHSA2	HK1_TE:6462;HK1_TE:6463;HK1_TE:6464	2	3
2	right	61245000	61292500	0.0035246	0.00376037	KIAA1841	HK1_TE:6462;HK1_TE:6463;HK1_TE:6464	1	3
2	left	61402500	61767500	0.000571434	1.22215e-06	RP11-493E12.1;AHSA2	HK1_TE:6469;HK1_TE:6470	2	2
2	left	61402500	61992500	9.08604e-09	2.03834e-07	RP11-493E12.1;AHSA2	HK1_TE:6474;HK1_TE:6475;HK1_TE:6476;HK1_TE:6477;HK1_TE:6478;HK1_TE:6479;HK1_TE:6480	2	7
2	right	61765000	62115000	9.34629e-08	7.92095e-08	CCT4;COMMD1	HK1_TE:6469;HK1_TE:6470	2	2
2	left	61765000	61990000	1.87481e-08	1.7747e-08	XPO1	HK1_TE:6474;HK1_TE:6475;HK1_TE:6476;HK1_TE:6477;HK1_TE:6478;HK1_TE:6479;HK1_TE:6480	1	7
2	left	63812500	64087500	6.18897e-09	5.41319e-09	MDH1	HK1_TE:6518;HK1_TE:6519	1	2
2	left	63917500	64087500	1.4005e-10	1.27084e-10	AC096664.1;AC096664.3	HK1_TE:6518;HK1_TE:6519	2	2
2	right	64327500	64362500	2.86262e-05	3.05713e-05	PELI1;AC074289.1	HK1_TE:6523	2	1
2	right	64752500	64977500	2.95586e-11	1.04531e-13	SERTAD2	HK1_TE:6540;HK1_TE:6541	1	2
2	left	64827500	64870000	5.58158e-10	6.17756e-10	AC007365.1	HK1_TE:6543;HK1_TE:6544;HK1_TE:6545;HK1_TE:6546;HK1_TE:6547;HK1_TE:6548;HK1_TE:6549;HK1_TE:6550;HK1_TE:6551	1	9
2	right	64872500	65095000	2.48316e-08	9.55702e-11	AC007880.1	HK1_TE:6543;HK1_TE:6544;HK1_TE:6545;HK1_TE:6546;HK1_TE:6547;HK1_TE:6548;HK1_TE:6549;HK1_TE:6550;HK1_TE:6551	1	9
2	right	64876500	65083500	4.0025e-22	8.02634e-13	AC007880.1	HK1_TE:6543;HK1_TE:6544;HK1_TE:6545;HK1_TE:6546;HK1_TE:6547;HK1_TE:6548;HK1_TE:6549;HK1_TE:6550;HK1_TE:6551;HK1_TE:6552	1	10
2	left	65177500	65217500	0.000106518	0.00359558	AC007386.3	HK1_TE:6562	1	1
2	right	65177500	65217500	0.000106518	0.00359558	SLC1A4;RNU6-548P	HK1_TE:6560;HK1_TE:6561	2	2
2	left	65217500	65262500	0.00190502	0.0286881	SLC1A4;RNU6-548P	HK1_TE:6563;HK1_TE:6564	2	2
2	right	65217500	65262500	0.00190502	0.0286881	AC007386.4	HK1_TE:6562	1	1
2	left	65292500	65457500	0.00283092	0.000214472	CEP68	HK1_TE:6569;HK1_TE:6570	1	2
2	right	65292500	65457500	0.00283092	0.000214472	ACTR2	HK1_TE:6565;HK1_TE:6566;HK1_TE:6567	1	3
2	left	65355000	65455000	2.02754e-06	2.13562e-06	RAB1A	HK1_TE:6569;HK1_TE:6570	1	2
2	left	65357500	65802500	9.08604e-09	2.03834e-07	RAB1A	HK1_TE:6579;HK1_TE:6580;HK1_TE:6581;HK1_TE:6582;HK1_TE:6583	1	5
2	left	65604500	65790500	4.95717e-09	4.66247e-09	AC012370.2	HK1_TE:6578;HK1_TE:6579;HK1_TE:6580;HK1_TE:6581;HK1_TE:6582	1	5
2	left	65661875	65789375	8.2571e-09	2.50803e-11	SPRED2;AC074391.1	HK1_TE:6578;HK1_TE:6579;HK1_TE:6580;HK1_TE:6581;HK1_TE:6582	2	5
2	right	65661875	65789375	8.2571e-09	2.50803e-11	Vault	HK1_TE:6575;HK1_TE:6576	1	2
2	left	65862500	66787500	7.21919e-07	0.000209396	AC007389.3	HK1_TE:6595;HK1_TE:6596;HK1_TE:6597;HK1_TE:6598;HK1_TE:6599	1	5
2	left	68382500	68417500	0.00111026	0.0010752	WDR92;PNO1	HK1_TE:6638;HK1_TE:6639;HK1_TE:6640;HK1_TE:6641	2	4
2	right	68385000	68692500	0.0182713	0.0179087	FBXO48;APLF	HK1_TE:6636	2	1
2	right	68425000	68585000	5.884e-05	5.26111e-05	AC015969.3;PLEK	HK1_TE:6638;HK1_TE:6639;HK1_TE:6640;HK1_TE:6641	2	4
2	right	68422500	68667500	9.3353e-09	7.68971e-09	AC127383.1	HK1_TE:6638;HK1_TE:6639;HK1_TE:6640;HK1_TE:6641	1	4
2	right	68975000	69060000	0.00694757	0.00740321	AC097495.2;AC097495.3	HK1_TE:6650;HK1_TE:6651	2	2
2	left	69665000	69875000	1.04148e-05	0.000998204	NFU1	HK1_TE:6671;HK1_TE:6672;HK1_TE:6673	1	3
2	right	69785000	70045000	1.9161e-05	0.00076351	GMCL1	HK1_TE:6667	1	1
2	right	69960000	70122500	0.00808291	0.0083976	SNRNP27;MXD1;AC019206.1	HK1_TE:6691	3	1
2	right	70007500	70050000	0.0180861	0.017896	GMCL1	HK1_TE:6696;HK1_TE:6697;HK1_TE:6698;HK1_TE:6699;HK1_TE:6700;HK1_TE:6701	1	6
2	left	70137500	70862500	0.0106978	0.000553832	MXD1;AC019206.1;snoU13	HK1_TE:6763	3	1
2	left	70142500	70227500	1.62876e-06	0.000107722	AC019206.1;snoU13	HK1_TE:6705;HK1_TE:6706;HK1_TE:6707;HK1_TE:6708;HK1_TE:6709	2	5
2	left	70175500	70226500	2.0493e-11	2.04809e-08	snoU13;ASPRV1	HK1_TE:6705;HK1_TE:6706;HK1_TE:6707;HK1_TE:6708;HK1_TE:6709	2	5
2	right	70230833	70365833	0.000212862	0.00302692	AC016700.5	HK1_TE:6705;HK1_TE:6706;HK1_TE:6707;HK1_TE:6708;HK1_TE:6709	1	5
2	left	70310000	70470000	5.884e-05	5.26111e-05	PCBP1-AS1;RN7SL470P;PCBP1;AC016700.2	HK1_TE:6717;HK1_TE:6718	4	2
2	right	70310000	70470000	5.884e-05	5.26111e-05	C2orf42;TIA1;MIR1285-2;AC016700.6;PCYOX1	HK1_TE:6710;HK1_TE:6711;HK1_TE:6712;HK1_TE:6713	5	4
2	left	70537500	71187500	3.0391e-06	5.74304e-09	FAM136A;AC022201.5	HK1_TE:6764	2	1
2	left	70566250	70781250	3.49089e-08	3.69574e-08	BRD7P6	HK1_TE:6745;HK1_TE:6746;HK1_TE:6747;HK1_TE:6748;HK1_TE:6749;HK1_TE:6750;HK1_TE:6751;HK1_TE:6752;HK1_TE:6753;HK1_TE:6754;HK1_TE:6755;HK1_TE:6756;HK1_TE:6757	1	13
2	left	70566500	70673500	4.39435e-09	6.43495e-07	BRD7P6	HK1_TE:6719	1	1
2	right	70687500	71012500	0.0123411	0.0147331	FIGLA	HK1_TE:6720	1	1
2	left	70786000	70841500	1.22699e-24	1.1269e-16	TGFA	HK1_TE:6762	1	1
2	left	71175000	71225000	7.40479e-05	8.06912e-05	ATP6V1B1;AC007040.7;TCEB1P21	HK1_TE:6765	3	1
2	right	71175000	71225000	7.40479e-05	8.06912e-05	AC007040.11;TEX261;AC007040.6;AC007040.2	HK1_TE:6764	4	1
2	right	71773500	72374500	6.84265e-22	4.13143e-19	CYP26B1	HK1_TE:6771	1	1
2	right	72155000	72375000	1.25341e-29	4.53089e-35	CYP26B1	HK1_TE:6784	1	1
2	left	72222500	72372500	8.7073e-05	2.60856e-06	RPS20P10	HK1_TE:6800;HK1_TE:6801;HK1_TE:6802	1	3
2	left	72996500	73049500	3.37209e-10	3.2748e-10	SNORD78	HK1_TE:6817;HK1_TE:6818;HK1_TE:6819;HK1_TE:6820;HK1_TE:6821;HK1_TE:6822	1	6
2	right	72996500	73049500	3.37209e-10	3.2748e-10	EXOC6B	HK1_TE:6807;HK1_TE:6808;HK1_TE:6809;HK1_TE:6810;HK1_TE:6811;HK1_TE:6812;HK1_TE:6813;HK1_TE:6814;HK1_TE:6815	1	9
2	left	73312500	73398500	0.00145157	0.00146843	SFXN5	HK1_TE:6827	1	1
2	right	73312500	73398500	0.00145157	0.00146843	RAB11FIP5	HK1_TE:6826	1	1
2	left	74162500	74662500	0.000605623	0.000671985	DGUOK	HK1_TE:6848	1	1
2	right	74162500	74662500	0.000605623	0.000671985	C2orf81;WDR54;RTKN	HK1_TE:6838;HK1_TE:6839;HK1_TE:6840	3	3
2	right	74161666	74210000	4.83439e-17	5.17322e-17	DGUOK-AS1;RNA5SP97;AC073046.25;RP11-711M9.1	HK1_TE:6838;HK1_TE:6839;HK1_TE:6840	4	3
2	right	74152500	74237500	0.000477668	0.000480229	TET3	HK1_TE:6838;HK1_TE:6839;HK1_TE:6840	1	3
2	left	74620000	74667500	8.37638e-06	7.98104e-06	DCTN1;DCTN1-AS1	HK1_TE:6848	2	1
2	right	74620000	74667500	8.37638e-06	7.98104e-06	RTKN;INO80B	HK1_TE:6847	2	1
2	right	74649166	74685833	9.1596e-06	9.94583e-06	INO80B;WBP1;MOGS;MRPL53	HK1_TE:6847;HK1_TE:6848	4	2
2	right	74917500	75062500	2.02113e-12	2.1444e-12	RP11-259N19.1;HK2	HK1_TE:6851	2	1
2	right	74936136	75075681	1.95597e-19	3.2748e-10	RP11-259N19.1;HK2	HK1_TE:6852;HK1_TE:6853	2	2
2	left	75692500	75846944	6.61137e-12	2.87413e-09	GAPDHP57;AC007099.2	HK1_TE:6885;HK1_TE:6886;HK1_TE:6887;HK1_TE:6888;HK1_TE:6889	2	5
2	left	81708333	81878333	0.00770782	0.00758503	AC012075.2	HK1_TE:6912;HK1_TE:6913;HK1_TE:6914;HK1_TE:6915;HK1_TE:6916	1	5
2	left	81707500	82062500	0.000148601	0.00103268	AC012075.2	HK1_TE:6917;HK1_TE:6918	1	2
2	left	81887500	83237500	1.48273e-06	0.000216004	AC013262.1	HK1_TE:6926;HK1_TE:6927;HK1_TE:6928	1	3
2	right	85137500	86662500	6.92408e-05	0.000174485	KDM3A	HK1_TE:6947;HK1_TE:6948	1	2
2	left	85146250	85193750	1.7022e-17	1.39245e-17	TRABD2A;TMSB10;AC022210.2	HK1_TE:6952	3	1
2	left	85196250	85238750	0.00254841	0.00265048	KCMF1	HK1_TE:6953	1	1
2	right	85492500	85527500	1.14535e-05	1.22662e-05	AC093162.1;AC093162.5	HK1_TE:6955	2	1
2	right	85647500	85834166	0.00694757	0.000569427	RNF181;TMEM150A;USP39;C2orf68	HK1_TE:6957;HK1_TE:6958	4	2
2	left	86130000	86187500	8.7073e-05	0.00183873	ST3GAL5;AC105053.4;RP11-548P2.2	HK1_TE:7016;HK1_TE:7017;HK1_TE:7018;HK1_TE:7019;HK1_TE:7020;HK1_TE:7021	3	6
2	right	88315000	88355000	8.46112e-09	6.79008e-12	KRCC1;SMYD1	HK1_TE:7076	2	1
2	left	96875000	97005000	0.00029126	0.000266445	STARD7;AC012307.3	HK1_TE:7133;HK1_TE:7134	2	2
2	left	96872500	96930000	9.56477e-20	8.79215e-20	STARD7;AC012307.3	HK1_TE:7130;HK1_TE:7131	2	2
2	left	96932500	96972500	1.27441e-09	1.25564e-09	TMEM127;CIAO1	HK1_TE:7132	2	1
2	right	96932500	96972500	1.27441e-09	1.25564e-09	SNRNP200;AC021188.4	HK1_TE:7130;HK1_TE:7131	2	2
2	right	97077500	97165833	3.55015e-25	2.973e-20	NEURL3	HK1_TE:7135;HK1_TE:7136;HK1_TE:7137;HK1_TE:7138	1	4
2	right	97222500	97302500	0.00694757	0.000569427	KANSL3;FER1L5	HK1_TE:7145	2	1
2	right	97222500	97427500	2.06874e-05	0.000236297	CNNM4	HK1_TE:7145	1	1
2	right	100125000	101175000	0.000741866	9.00978e-05	RN7SL611P;PDCL3	HK1_TE:7216;HK1_TE:7217;HK1_TE:7218	2	3
2	right	101654166	101769166	4.13733e-14	1.63551e-11	RP11-299H21.1	HK1_TE:7237;HK1_TE:7238;HK1_TE:7239	1	3
2	left	101770000	101820000	0.00694757	0.00740321	RP11-299H21.1	HK1_TE:7248;HK1_TE:7249;HK1_TE:7250	1	3
2	left	101875000	101925000	0.00247864	8.36391e-06	TBC1D8;CNOT11;SNORD89	HK1_TE:7251	3	1
2	left	102012500	102612500	0.00135087	0.00144181	CREG2	HK1_TE:7296;HK1_TE:7297;HK1_TE:7298;HK1_TE:7299	1	4
2	right	102012500	102612500	0.00135087	0.00144181	IL1R2	HK1_TE:7261;HK1_TE:7262;HK1_TE:7263	1	3
2	left	102135000	102605000	0.000334829	0.000370864	AC092570.3;AC092570.4	HK1_TE:7296;HK1_TE:7297;HK1_TE:7298;HK1_TE:7299	2	4
2	right	102135000	102605000	0.000334829	0.000370864	IL1R2	HK1_TE:7268;HK1_TE:7269	1	2
2	left	102317500	102445000	8.2875e-07	7.94644e-07	MAP4K4	HK1_TE:7285;HK1_TE:7286;HK1_TE:7287;HK1_TE:7288;HK1_TE:7289;HK1_TE:7290	1	6
2	left	102515000	102965000	0.00269542	0.0253822	FLJ20373	HK1_TE:7308	1	1
2	left	102517500	102570000	0.000543794	0.000569427	FLJ20373	HK1_TE:7295	1	1
2	right	102867500	103067500	0.000147027	2.0072e-06	AC007278.3	HK1_TE:7306;HK1_TE:7307	1	2
2	left	102871666	102968333	2.3178e-06	2.20337e-06	AC007248.6	HK1_TE:7308	1	1
2	left	102922500	102972500	0.00694757	0.00740321	IL1RL1;IL18R1	HK1_TE:7308	2	1
2	right	102972500	103062500	0.00708501	0.00675161	MIR4772;AC007278.2;AC007278.3	HK1_TE:7308	3	1
2	right	106735000	106808750	1.99973e-07	8.4562e-06	UXS1;AC018878.3	HK1_TE:7344;HK1_TE:7345;HK1_TE:7355	2	3
2	right	106777500	106812500	2.10534e-07	2.27903e-07	UXS1	HK1_TE:7347;HK1_TE:7348;HK1_TE:7349;HK1_TE:7350;HK1_TE:7351;HK1_TE:7352;HK1_TE:7353;HK1_TE:7354	1	8
2	left	109065000	109195000	1.04148e-05	9.32258e-06	GCC2	HK1_TE:7366	1	1
2	right	109540000	109605000	0.0319517	0.0338032	EDAR	HK1_TE:7369;HK1_TE:7370;HK1_TE:7371	1	3
2	right	109537500	109742500	0.000935164	0.000903509	SH3RF3-AS1;SH3RF3	HK1_TE:7369;HK1_TE:7370;HK1_TE:7371	2	3
2	left	109742500	109827500	0.00354321	0.000312848	SH3RF3-AS1;SH3RF3	HK1_TE:7378;HK1_TE:7379;HK1_TE:7380	2	3
2	left	111434166	111502500	7.20906e-10	5.85774e-10	BUB1	HK1_TE:7423;HK1_TE:7424	1	2
2	right	111434166	111502500	7.20906e-10	5.85774e-10	ACOXL	HK1_TE:7418;HK1_TE:7419;HK1_TE:7420	1	3
2	left	111877500	111912500	0.0035246	0.00376037	AC096670.3;BCL2L11	HK1_TE:7428	2	1
2	left	112262500	112462500	0.000369432	0.000448985	MIR4435-1HG;AC017002.1;AC017002.2	HK1_TE:7481;HK1_TE:7482;HK1_TE:7483;HK1_TE:7484;HK1_TE:7485;HK1_TE:7486	3	6
2	right	112262500	112462500	0.000369432	0.000448985	AC093166.2	HK1_TE:7457;HK1_TE:7458;HK1_TE:7459;HK1_TE:7460;HK1_TE:7461;HK1_TE:7462	1	6
2	left	112702500	112792500	3.32465e-05	3.44204e-05	RN7SL297P;AC104651.2;AC104651.3	HK1_TE:7503;HK1_TE:7504;HK1_TE:7505;HK1_TE:7506;HK1_TE:7507;HK1_TE:7508;HK1_TE:7509;HK1_TE:7510;HK1_TE:7511;HK1_TE:7512	3	10
2	right	113342500	113382500	0.000305398	0.000294535	AC079922.2	HK1_TE:7519	1	1
2	left	113512500	113706250	0.000328442	1.9163e-05	CKAP2L	HK1_TE:7555;HK1_TE:7556;HK1_TE:7557;HK1_TE:7558;HK1_TE:7559;HK1_TE:7560;HK1_TE:7561;HK1_TE:7562	1	8
2	left	113515000	113695000	0.000471635	0.000502906	CKAP2L	HK1_TE:7555;HK1_TE:7556;HK1_TE:7557;HK1_TE:7558;HK1_TE:7559	1	5
2	left	113531136	113586136	2.0493e-11	2.14714e-11	CKAP2L;IL1A	HK1_TE:7540;HK1_TE:7541;HK1_TE:7542;HK1_TE:7543;HK1_TE:7544;HK1_TE:7545;HK1_TE:7546;HK1_TE:7547;HK1_TE:7548;HK1_TE:7549;HK1_TE:7550;HK1_TE:7551;HK1_TE:7552;HK1_TE:7553;HK1_TE:7554	2	15
2	right	113531136	113586136	2.0493e-11	2.14714e-11	IL1B	HK1_TE:7525;HK1_TE:7526;HK1_TE:7527	1	3
2	right	113562500	113837500	5.19489e-06	4.91854e-06	IL1F10;RNU6-1180P	HK1_TE:7529;HK1_TE:7530;HK1_TE:7531;HK1_TE:7532;HK1_TE:7533;HK1_TE:7534;HK1_TE:7535;HK1_TE:7536;HK1_TE:7537;HK1_TE:7538;HK1_TE:7539;HK1_TE:7540;HK1_TE:7541;HK1_TE:7542;HK1_TE:7543	2	15
2	left	113837500	113877500	5.96206e-07	6.43495e-07	IL1F10;RNU6-1180P	HK1_TE:7571;HK1_TE:7572;HK1_TE:7573;HK1_TE:7574;HK1_TE:7575	2	5
2	right	113837500	113877500	5.96206e-07	6.43495e-07	IL1RN	HK1_TE:7566;HK1_TE:7567;HK1_TE:7568;HK1_TE:7569;HK1_TE:7570	1	5
2	left	113835000	113997500	2.61502e-05	1.42721e-08	IL1F10;RNU6-1180P	HK1_TE:7583;HK1_TE:7584;HK1_TE:7585;HK1_TE:7586	2	4
2	right	113835000	113997500	2.61502e-05	1.42721e-08	RP11-65I12.1	HK1_TE:7566;HK1_TE:7567;HK1_TE:7568;HK1_TE:7569;HK1_TE:7570	1	5
2	left	113912500	113997500	7.54431e-07	7.09813e-07	PSD4	HK1_TE:7583;HK1_TE:7584;HK1_TE:7585;HK1_TE:7586	1	4
2	right	113912500	113997500	7.54431e-07	7.09813e-07	RP11-65I12.1	HK1_TE:7577;HK1_TE:7578;HK1_TE:7579;HK1_TE:7580	1	4
2	left	113997500	114087500	2.84275e-09	2.31256e-07	RP11-65I12.1	HK1_TE:7590;HK1_TE:7591;HK1_TE:7592;HK1_TE:7593	1	4
2	left	114042500	114085000	2.84275e-09	2.31256e-07	PAX8	HK1_TE:7590;HK1_TE:7591;HK1_TE:7592;HK1_TE:7593	1	4
2	left	114512500	114602500	2.48316e-08	9.55702e-11	SLC35F5	HK1_TE:7606;HK1_TE:7607;HK1_TE:7608;HK1_TE:7609	1	4
2	left	114602500	114645833	0.000477668	0.000480229	AC024704.2;AC104653.1;snoU13	HK1_TE:7610;HK1_TE:7611	3	2
2	right	114602500	114645833	0.000477668	0.000480229	RP11-141B14.1;ACTR3	HK1_TE:7606;HK1_TE:7607;HK1_TE:7608;HK1_TE:7609	2	4
2	right	118805000	118955000	1.62184e-05	2.43983e-08	AC093901.1	HK1_TE:7617;HK1_TE:7618	1	2
2	right	120165000	120232500	4.78813e-08	4.04891e-08	AC013275.2	HK1_TE:7645	1	1
2	left	120515000	120985000	5.30409e-05	5.00013e-05	PTPN4	HK1_TE:7664;HK1_TE:7665;HK1_TE:7666;HK1_TE:7667;HK1_TE:7668	1	5
2	right	120515000	120985000	5.30409e-05	5.00013e-05	AC012363.4;MTND3P10;AC012363.10;MTND4P26;MTND5P28;TMEM185B;RALB	HK1_TE:7650;HK1_TE:7651;HK1_TE:7652;HK1_TE:7653;HK1_TE:7654	7	5
2	left	120987500	121687500	4.95544e-06	6.47789e-08	AC012363.4;MTND5P28;TMEM185B;RALB	HK1_TE:7680;HK1_TE:7681;HK1_TE:7682;HK1_TE:7683	4	4
2	left	120995000	121045000	4.45521e-11	4.72517e-11	TMEM185B;RALB	HK1_TE:7669	2	1
2	left	121840000	122115000	0.00515142	2.0072e-06	AC067960.1	HK1_TE:7685;HK1_TE:7686	1	2
2	left	122412500	122464166	6.4405e-12	8.09106e-09	CLASP1;AC018737.1;AC018737.6	HK1_TE:7703;HK1_TE:7704	3	2
2	right	122412500	122464166	6.4405e-12	8.09106e-09	snoU13;NPM1P32	HK1_TE:7702	2	1
2	right	127907500	127980000	4.95717e-09	4.98874e-07	CYP27C1	HK1_TE:7714;HK1_TE:7715;HK1_TE:7716;HK1_TE:7717	1	4
2	left	127980000	128162500	8.19217e-05	0.000770561	CYP27C1	HK1_TE:7723;HK1_TE:7724;HK1_TE:7725;HK1_TE:7726;HK1_TE:7727;HK1_TE:7728;HK1_TE:7729;HK1_TE:7730	1	8
2	right	127980000	128162500	8.19217e-05	0.000770561	PROC	HK1_TE:7718;HK1_TE:7719	1	2
2	right	128692500	128782500	0.00354321	0.000312848	SAP130	HK1_TE:7744;HK1_TE:7745	1	2
2	right	128997500	129062500	0.000258212	0.000236297	HS6ST1	HK1_TE:7747;HK1_TE:7748	1	2
2	left	132262500	132437500	0.00241465	4.35315e-05	MZT2A;MIR4784;AC093838.4	HK1_TE:7781;HK1_TE:7782;HK1_TE:7783;HK1_TE:7784;HK1_TE:7785	3	5
2	right	132435000	132565000	0.00241793	0.00455736	C2orf27B	HK1_TE:7781;HK1_TE:7782;HK1_TE:7783;HK1_TE:7784;HK1_TE:7785	1	5
2	left	133112500	133172500	7.55773e-05	7.54171e-05	RP11-725P16.2;FAM201B	HK1_TE:7788;HK1_TE:7789	2	2
2	right	133112500	133172500	7.55773e-05	7.54171e-05	RNU6-175P;GPR39	HK1_TE:7786;HK1_TE:7787	2	2
2	left	134887500	135587500	0.00172062	0.00279465	MGAT5;MIR3679	HK1_TE:7823;HK1_TE:7824;HK1_TE:7825;HK1_TE:7826;HK1_TE:7827;HK1_TE:7828;HK1_TE:7829	2	7
2	right	134887500	135587500	0.00172062	0.00279465	AC110620.1;ACMSD	HK1_TE:7810;HK1_TE:7811;HK1_TE:7812;HK1_TE:7813;HK1_TE:7814;HK1_TE:7815;HK1_TE:7816	2	7
2	left	145087500	145412500	0.00296097	0.0034069	GTDC1	HK1_TE:7942	1	1
2	right	145087500	145412500	0.00296097	0.0034069	TEX41	HK1_TE:7938;HK1_TE:7939	1	2
2	left	145312500	145417500	0.0025542	0.00251694	AC010090.1	HK1_TE:7942	1	1
2	left	150462500	150787500	1.9868e-06	1.9916e-06	RNU6-601P	HK1_TE:7985;HK1_TE:7986	1	2
2	left	150462500	151912500	5.31986e-07	6.58848e-07	RNU6-601P	HK1_TE:8037	1	1
2	right	150987500	151022500	0.00016076	0.000172498	AC016682.1	HK1_TE:7992;HK1_TE:7993;HK1_TE:7994;HK1_TE:7995;HK1_TE:7996;HK1_TE:7997;HK1_TE:7998;HK1_TE:7999;HK1_TE:8000;HK1_TE:8001	1	10
2	right	151345000	151905000	2.65944e-06	2.80157e-06	AC023469.1	HK1_TE:8011;HK1_TE:8012;HK1_TE:8013;HK1_TE:8014;HK1_TE:8015;HK1_TE:8016;HK1_TE:8017	1	7
2	right	151347500	151427500	1.56416e-07	1.22662e-05	AC104777.2;AC104777.3	HK1_TE:8012;HK1_TE:8013;HK1_TE:8014;HK1_TE:8015;HK1_TE:8016;HK1_TE:8017	2	6
2	right	153045000	153192500	0.00016076	4.44343e-06	FMNL2	HK1_TE:8044;HK1_TE:8045	1	2
2	left	153195000	153355000	6.6368e-05	7.04169e-05	FMNL2	HK1_TE:8062;HK1_TE:8063;HK1_TE:8064;HK1_TE:8065;HK1_TE:8069	1	5
2	left	157197500	157332500	1.71532e-08	7.09813e-07	NR4A2	HK1_TE:8099;HK1_TE:8100;HK1_TE:8101;HK1_TE:8102;HK1_TE:8103;HK1_TE:8104;HK1_TE:8105	1	7
2	left	158735000	158865000	0.0064251	0.000119277	ACVR1;UPP2;RP11-546J1.1	HK1_TE:8136;HK1_TE:8137	3	2
2	left	159745000	160145000	5.30409e-05	8.73196e-07	OR7E90P	HK1_TE:8185;HK1_TE:8186;HK1_TE:8187	1	3
2	left	159787500	159825000	0.00367096	0.00359558	RNU2-21P	HK1_TE:8159;HK1_TE:8160	1	2
2	right	159787500	159825000	0.00367096	0.00359558	TANC1	HK1_TE:8155;HK1_TE:8156;HK1_TE:8157;HK1_TE:8158	1	4
2	left	160472500	160567500	0.000935164	0.000903509	BAZ2B;AC009506.1	HK1_TE:8195	2	1
2	right	160945000	161275000	3.25575e-05	3.05995e-05	MIR4785	HK1_TE:8202;HK1_TE:8203;HK1_TE:8204	1	3
2	right	161209166	161250833	1.68745e-06	1.58805e-06	RMRPP3;MIR4785	HK1_TE:8210;HK1_TE:8211;HK1_TE:8212	2	3
2	left	166815000	167045000	0.000370267	0.000348895	TTC21B;AC010127.3	HK1_TE:8308	2	1
2	right	169022500	169102500	1.62876e-06	1.75779e-06	STK39;AC067940.1	HK1_TE:8327	2	1
2	left	169312500	169467500	0.000840034	0.000770561	RN7SL95P;RN7SL813P;CERS6	HK1_TE:8343;HK1_TE:8344;HK1_TE:8345;HK1_TE:8346;HK1_TE:8347	3	5
2	left	170980000	171025000	0.00172072	0.00183873	RNU6-1006P	HK1_TE:8379;HK1_TE:8380;HK1_TE:8381;HK1_TE:8382;HK1_TE:8383;HK1_TE:8384	1	6
2	right	170980000	171025000	0.00172072	0.00183873	MYO3B	HK1_TE:8372;HK1_TE:8373;HK1_TE:8374;HK1_TE:8375;HK1_TE:8376	1	5
2	right	171092500	171670000	7.20906e-10	6.28942e-14	GAD1;AC007405.8	HK1_TE:8387	2	1
2	right	171250000	171562500	1.29805e-10	2.03169e-05	AC007277.3;AC007405.2;SP5	HK1_TE:8389	3	1
2	right	171385000	171445000	0.00445095	0.00481061	HMGB1P4	HK1_TE:8394;HK1_TE:8395	1	2
2	left	171787500	172082500	5.56385e-06	4.98605e-06	AC010092.1;GORASP2	HK1_TE:8410;HK1_TE:8411;HK1_TE:8412	2	3
2	left	172015000	172085000	0.000971158	0.00104497	snoU13	HK1_TE:8410;HK1_TE:8411;HK1_TE:8412	1	3
2	left	172435000	172555000	0.0019141	0.00193308	RPL21P38	HK1_TE:8429;HK1_TE:8430	1	2
2	left	172575000	173350000	8.26427e-15	1.08508e-07	AC068039.1	HK1_TE:8453	1	1
2	left	173915000	174045000	4.00414e-06	0.00168513	AC019046.1	HK1_TE:8484	1	1
2	right	174275000	175205000	5.11039e-05	0.0007726	AC018470.4;SP9;AC018470.1	HK1_TE:8488;HK1_TE:8489;HK1_TE:8490;HK1_TE:8491	3	4
2	left	174292500	174457500	0.000148601	0.00103268	AC073465.1	HK1_TE:8500;HK1_TE:8501	1	2
2	left	174452500	174515500	2.86262e-05	4.98874e-07	AC013410.1	HK1_TE:8502;HK1_TE:8503;HK1_TE:8504;HK1_TE:8505	1	4
2	left	174830000	174902500	7.40721e-08	7.92352e-08	SP3;RP11-394I13.2	HK1_TE:8510	2	1
2	left	174905000	175205000	5.884e-05	3.62742e-07	RP11-394I13.1;AC016737.1	HK1_TE:8523	2	1
2	right	174905000	175205000	5.884e-05	3.62742e-07	AC018470.4;SP9;AC018470.1	HK1_TE:8510	3	1
2	right	174995000	175205000	3.94776e-09	3.51716e-09	AC018470.4;SP9;AC018470.1	HK1_TE:8511;HK1_TE:8512;HK1_TE:8513;HK1_TE:8514;HK1_TE:8515;HK1_TE:8516	3	6
2	right	174982500	175042500	0.000228491	4.71409e-06	RP11-451F14.1	HK1_TE:8511;HK1_TE:8512;HK1_TE:8513;HK1_TE:8514;HK1_TE:8515;HK1_TE:8516	1	6
2	right	175020000	175205000	5.33088e-06	5.07153e-06	AC018470.4;SP9;AC018470.1	HK1_TE:8517;HK1_TE:8518	3	2
2	right	175020000	175105000	0.000366955	0.000394918	OLA1;RN7SL65P	HK1_TE:8517;HK1_TE:8518	2	2
2	right	177000000	178012500	7.47717e-15	1.48325e-14	RNA5SP112	HK1_TE:8534;HK1_TE:8535	1	2
2	left	177005000	177420000	2.23037e-06	2.0072e-06	HOXD-AS2;HOXD8;HOXD3;MIR10B;HOXD4	HK1_TE:8542;HK1_TE:8543	5	2
2	left	177001136	177507954	1.9053e-18	8.05617e-13	HOXD-AS2;HOXD9;HOXD8;HOXD3;MIR10B;HOXD4	HK1_TE:8546;HK1_TE:8547;HK1_TE:8548;HK1_TE:8549;HK1_TE:8550	6	5
2	right	177001136	177507954	1.9053e-18	8.05617e-13	AC017048.3;AC017048.4	HK1_TE:8534;HK1_TE:8535	2	2
2	right	177325833	177502500	0.000543794	2.58117e-05	AC017048.3;AC017048.4	HK1_TE:8539	2	1
2	left	178027500	178282500	1.11207e-06	9.78406e-07	AC079305.11;AC079305.5	HK1_TE:8564;HK1_TE:8565;HK1_TE:8566;HK1_TE:8567;HK1_TE:8568;HK1_TE:8569;HK1_TE:8570	2	7
2	left	178127500	178267500	4.99832e-08	4.6024e-08	MIR3128;AC079305.10	HK1_TE:8564;HK1_TE:8565	2	2
2	right	178127500	178267500	4.99832e-08	4.6024e-08	NFE2L2;AC074286.1;AGPS	HK1_TE:8558	3	1
2	left	178265000	178335000	1.72472e-06	1.81709e-06	NFE2L2;AC074286.1;AGPS	HK1_TE:8571;HK1_TE:8572	3	2
2	right	187407500	187455000	0.00125972	0.00133372	ITGAV	HK1_TE:8693;HK1_TE:8694	1	2
2	left	190010000	190152500	2.10182e-05	1.9163e-05	MIR3129	HK1_TE:8711;HK1_TE:8712	1	2
2	right	191645000	191745000	0.00025466	0.000249467	AC005540.3;GLS	HK1_TE:8735;HK1_TE:8736	2	2
2	right	191710000	191745000	0.0349543	0.0353706	AC005540.3;GLS	HK1_TE:8737;HK1_TE:8738	2	2
2	left	191745000	191875000	0.00445095	3.50901e-05	AC005540.3;GLS	HK1_TE:8741	2	1
2	right	191745000	191875000	0.00445095	3.50901e-05	STAT1;AC067945.2;AC067945.4	HK1_TE:8739	3	1
2	left	191757500	191797500	0.00016076	0.000172498	AC005540.3;GLS	HK1_TE:8740	2	1
2	left	192034375	192173125	1.15209e-17	1.55106e-21	HMGB1P27	HK1_TE:8747;HK1_TE:8748;HK1_TE:8749;HK1_TE:8750;HK1_TE:8751;HK1_TE:8752;HK1_TE:8753;HK1_TE:8754;HK1_TE:8755;HK1_TE:8756;HK1_TE:8757;HK1_TE:8758;HK1_TE:8759	1	13
2	left	192033750	192246250	2.27836e-13	1.93217e-13	HMGB1P27	HK1_TE:8762;HK1_TE:8763;HK1_TE:8764;HK1_TE:8765;HK1_TE:8766;HK1_TE:8767;HK1_TE:8768;HK1_TE:8769;HK1_TE:8770	1	9
2	left	192025833	192385833	7.53704e-05	6.83078e-05	STAT4;HMGB1P27	HK1_TE:8773	2	1
2	left	192034166	192114166	6.4405e-12	2.47005e-15	HMGB1P27	HK1_TE:8744;HK1_TE:8745;HK1_TE:8746	1	3
2	left	192112500	192172500	0.00364439	0.00365081	AC092614.2;MYO1B	HK1_TE:8747;HK1_TE:8748;HK1_TE:8749;HK1_TE:8750;HK1_TE:8751;HK1_TE:8752;HK1_TE:8753;HK1_TE:8754;HK1_TE:8755;HK1_TE:8756;HK1_TE:8757;HK1_TE:8758;HK1_TE:8759	2	13
2	left	195412500	196187500	5.10015e-05	1.08508e-07	AC073973.1	HK1_TE:8812;HK1_TE:8813;HK1_TE:8814	1	3
2	right	196435000	196522500	2.62077e-10	2.7678e-10	RNU6-915P	HK1_TE:8823	1	1
2	left	197031250	197134375	4.73527e-15	2.18419e-11	STK17B	HK1_TE:8834;HK1_TE:8835;HK1_TE:8836;HK1_TE:8837;HK1_TE:8838;HK1_TE:8839;HK1_TE:8840;HK1_TE:8841	1	8
2	right	197031250	197134375	4.73527e-15	2.18419e-11	AC020571.3	HK1_TE:8828;HK1_TE:8829	1	2
2	left	197032500	197095500	6.26783e-13	6.73527e-13	STK17B	HK1_TE:8830;HK1_TE:8831;HK1_TE:8832;HK1_TE:8833	1	4
2	right	197097500	197157500	1.14535e-05	1.22662e-05	RN7SL820P	HK1_TE:8830;HK1_TE:8831;HK1_TE:8832;HK1_TE:8833	1	4
2	left	197665000	197785000	0.00380513	0.00366416	GTF3C3;C2orf66	HK1_TE:8851	2	1
2	left	197792500	197852500	1.86018e-12	2.01807e-12	PGAP1	HK1_TE:8852;HK1_TE:8853	1	2
2	left	198375000	198485000	0.0178636	0.00076351	HSPD1;HSPE1;HSPE1-MOB4;MOB4	HK1_TE:8855;HK1_TE:8856;HK1_TE:8857;HK1_TE:8858	4	4
2	right	200840000	201565000	0.000215671	0.000230095	AOX2P	HK1_TE:8871;HK1_TE:8872;HK1_TE:8873;HK1_TE:8874;HK1_TE:8875;HK1_TE:8876	1	6
2	right	200845833	201170833	2.84275e-09	2.62391e-09	SPATS2L	HK1_TE:8871;HK1_TE:8872;HK1_TE:8873;HK1_TE:8874;HK1_TE:8875;HK1_TE:8876	1	6
2	left	201175500	201268500	1.86018e-12	2.01807e-12	SPATS2L	HK1_TE:8901;HK1_TE:8902;HK1_TE:8903;HK1_TE:8904;HK1_TE:8905;HK1_TE:8906;HK1_TE:8907	1	7
2	left	201172500	201342500	0.000935164	6.83078e-05	SPATS2L	HK1_TE:8908;HK1_TE:8909;HK1_TE:8910	1	3
2	right	201347500	201565000	0.00752639	0.00758585	AOX2P	HK1_TE:8908;HK1_TE:8909;HK1_TE:8910	1	3
2	left	201444166	201566666	2.62081e-20	2.24804e-20	AOX1	HK1_TE:8916	1	1
2	left	201937500	202030833	1.27911e-09	1.59886e-07	FAM126B;HNRNPA1P35;AC005037.4;NDUFB3;RNU6-1206P	HK1_TE:8923;HK1_TE:8924	5	2
2	left	201982500	202022500	2.15113e-15	4.73011e-21	AC007272.3;AC007272.1;CFLAR	HK1_TE:8922;HK1_TE:8923;HK1_TE:8924	3	3
2	right	201982500	202022500	2.15113e-15	4.73011e-21	CFLAR-AS1;AC007283.4;AC007283.5	HK1_TE:8919	3	1
2	left	202659166	202897500	7.54431e-07	2.58117e-05	ALS2;CDK15;Y_RNA	HK1_TE:8932	3	1
2	right	202659166	202897500	7.54431e-07	2.58117e-05	RP11-107N15.1;FZD7	HK1_TE:8928	2	1
2	right	202662500	203037500	5.27227e-15	5.41319e-09	AC079354.5;PSMA2P3	HK1_TE:8928	2	1
2	right	202897500	203242500	0.000593174	0.000582031	RP11-686O6.2;BMPR2	HK1_TE:8932	2	1
2	right	205212500	206550000	0.000143783	0.00876377	NRP2	HK1_TE:8960;HK1_TE:8961	1	2
2	right	207418333	207648333	0.000981937	0.00106783	MIR3130-1	HK1_TE:8984;HK1_TE:8985;HK1_TE:8986	1	3
2	right	207422500	207480000	0.00608815	0.00657688	AC010731.2	HK1_TE:8984;HK1_TE:8985;HK1_TE:8986	1	3
2	right	208352500	208392500	0.00203694	4.93114e-05	AC007879.5;CREB1	HK1_TE:9018;HK1_TE:9019;HK1_TE:9020	2	3
2	left	208400000	208485000	0.00354321	0.000312848	AC007879.5;CREB1	HK1_TE:9026;HK1_TE:9027;HK1_TE:9028;HK1_TE:9029;HK1_TE:9030	2	5
2	right	208400000	208485000	0.00354321	0.000312848	METTL21A	HK1_TE:9025	1	1
2	right	210235000	210285000	8.7262e-13	1.10269e-08	MAP2	HK1_TE:9049;HK1_TE:9050;HK1_TE:9051;HK1_TE:9052;HK1_TE:9053;HK1_TE:9054	1	6
2	right	210507500	210592500	8.2875e-07	3.44204e-05	RNA5SP118	HK1_TE:9062;HK1_TE:9063;HK1_TE:9064;HK1_TE:9065;HK1_TE:9066;HK1_TE:9067;HK1_TE:9068	1	7
2	right	213715000	214015000	4.22807e-06	3.78655e-06	IKZF2;RP11-105N14.1	HK1_TE:9091;HK1_TE:9092	2	2
2	left	213777500	214017500	7.53704e-05	0.000903509	AC108066.1;MIR4776-2	HK1_TE:9106;HK1_TE:9107	2	2
2	right	213777500	214017500	7.53704e-05	0.000903509	IKZF2;RP11-105N14.1;RP11-105N14.3	HK1_TE:9093;HK1_TE:9094;HK1_TE:9095;HK1_TE:9096;HK1_TE:9097;HK1_TE:9098	3	6
2	left	214015000	214105000	6.6368e-05	1.55838e-07	IKZF2;RP11-105N14.1	HK1_TE:9112;HK1_TE:9113;HK1_TE:9114;HK1_TE:9115;HK1_TE:9116;HK1_TE:9117	2	6
2	right	214112500	216175000	0.0326188	7.81588e-05	snoU13;ATIC	HK1_TE:9114;HK1_TE:9115;HK1_TE:9116;HK1_TE:9117	2	4
2	left	216312500	216687500	3.46571e-11	3.08413e-06	FN1;AC012462.1;AC012462.2	HK1_TE:9145	3	1
2	left	216395000	216472500	0.000571434	0.000572385	AC012668.2	HK1_TE:9137;HK1_TE:9138	1	2
2	left	216815833	216884166	0.000106711	0.000100568	AC093382.1	HK1_TE:9149	1	1
2	left	219052500	219127500	0.000571434	0.000572385	snoU13;HMGB1P9	HK1_TE:9169	2	1
2	left	219137500	219440000	2.06874e-05	1.89137e-05	GPBAR1;AAMP;PNKD	HK1_TE:9175;HK1_TE:9176	3	2
2	right	219137500	219440000	2.06874e-05	1.89137e-05	USP37;RQCD1;RNU6-136P	HK1_TE:9169	3	1
2	right	219162500	219537500	0.000189186	0.000206577	ZNF142;BCS1L;RNF25;STK36	HK1_TE:9170;HK1_TE:9171	4	2
2	right	219440000	219521250	3.32465e-05	3.44204e-05	ZNF142;BCS1L	HK1_TE:9175;HK1_TE:9176	2	2
2	left	219522500	219577500	0.00172072	0.00183873	ZNF142;BCS1L;RNF25;STK36	HK1_TE:9177	4	1
2	left	219588750	219712500	6.61137e-12	7.36753e-15	TTLL4	HK1_TE:9180;HK1_TE:9181	1	2
2	right	219588750	219712500	6.61137e-12	7.36753e-15	AC009974.11;WNT6	HK1_TE:9177;HK1_TE:9178;HK1_TE:9179	2	3
2	left	219715000	219825000	0.00025466	0.000249467	AC009974.11;WNT6	HK1_TE:9185;HK1_TE:9186	2	2
2	right	219715000	219825000	0.00025466	0.000249467	AC097468.7;KRT8P30;CDK5R2	HK1_TE:9180;HK1_TE:9181	3	2
2	left	220037500	220152500	8.7073e-05	9.07266e-05	NHEJ1;SLC23A3;CNPPD1;FAM134A	HK1_TE:9188;HK1_TE:9189;HK1_TE:9190;HK1_TE:9191;HK1_TE:9192	4	5
2	left	220077500	220117500	0.000154959	0.000149481	ABCB6;AC068946.1	HK1_TE:9187	2	1
2	left	220407500	220500000	0.000543794	2.58117e-05	CHPF;TMEM198;RP11-256I23.1;MIR3132	HK1_TE:9196;HK1_TE:9197;HK1_TE:9198	4	3
2	left	223565000	223767500	8.33652e-13	1.27084e-10	snoU13;AC016712.1	HK1_TE:9272;HK1_TE:9273	2	2
2	right	224405000	224465000	0.000129497	0.000137358	SCG2	HK1_TE:9281;HK1_TE:9282;HK1_TE:9283;HK1_TE:9284;HK1_TE:9285;HK1_TE:9286	1	6
2	left	225042500	225087500	0.00364439	0.00365081	AC019109.1	HK1_TE:9322;HK1_TE:9323	1	2
2	right	225347500	225452500	0.00608815	0.000572385	CUL3	HK1_TE:9324;HK1_TE:9325	1	2
2	left	225452500	225542500	2.80551e-06	2.60212e-06	CUL3	HK1_TE:9328;HK1_TE:9329	1	2
2	right	226982500	227537500	2.35211e-07	2.03834e-07	MIR5702	HK1_TE:9349;HK1_TE:9350;HK1_TE:9351;HK1_TE:9352;HK1_TE:9353;HK1_TE:9354	1	6
2	right	227002500	227527500	3.29669e-11	1.37632e-09	MIR5702	HK1_TE:9354;HK1_TE:9355;HK1_TE:9356	1	3
2	right	227100000	227662500	1.44614e-13	1.19078e-13	IRS1;RP11-395N3.2;RP11-395N3.1	HK1_TE:9360	3	1
2	right	227302500	227525000	2.61502e-05	2.58117e-05	MIR5702	HK1_TE:9364;HK1_TE:9365;HK1_TE:9366;HK1_TE:9367;HK1_TE:9368;HK1_TE:9369;HK1_TE:9370;HK1_TE:9371	1	8
2	left	227524166	227660833	2.66526e-09	6.42055e-12	MIR5702	HK1_TE:9397;HK1_TE:9398	1	2
2	right	227524166	227660833	2.66526e-09	6.42055e-12	IRS1;RP11-395N3.2;RP11-395N3.1	HK1_TE:9382;HK1_TE:9383;HK1_TE:9384;HK1_TE:9385;HK1_TE:9386;HK1_TE:9387;HK1_TE:9388;HK1_TE:9389	3	8
2	left	227526250	227622500	3.32465e-05	0.000868542	MIR5702	HK1_TE:9391;HK1_TE:9392;HK1_TE:9393;HK1_TE:9394	1	4
2	right	227622500	227657500	0.00429446	7.39759e-05	IRS1;RP11-395N3.2;RP11-395N3.1	HK1_TE:9391;HK1_TE:9392;HK1_TE:9393;HK1_TE:9394	3	4
2	left	227697500	227842500	6.88926e-08	4.44343e-06	RHBDD1	HK1_TE:9399;HK1_TE:9400;HK1_TE:9401;HK1_TE:9402	1	4
2	right	228262500	228737500	0.000543288	1.76248e-07	TDGF1P2;DAW1;SNORA25	HK1_TE:9404;HK1_TE:9405;HK1_TE:9406;HK1_TE:9407	3	4
2	right	229550000	230137500	5.5249e-07	2.88143e-10	PID1	HK1_TE:9436	1	1
2	right	229562500	230587500	0.00304999	9.46834e-05	DNER	HK1_TE:9436;HK1_TE:9437	1	2
2	right	230205000	230585000	0.000806787	1.78491e-05	DNER	HK1_TE:9438;HK1_TE:9439	1	2
2	right	230300000	230587500	2.70427e-06	2.59054e-06	DNER	HK1_TE:9449	1	1
2	left	231084166	231197500	2.43743e-07	2.31256e-07	SP110	HK1_TE:9479;HK1_TE:9480;HK1_TE:9481	1	3
2	right	231084166	231197500	2.43743e-07	2.31256e-07	SP140L	HK1_TE:9475;HK1_TE:9477	1	2
2	left	231084166	231279166	0.000935164	0.0083976	SP110	HK1_TE:9482	1	1
2	right	231084166	231279166	0.000935164	0.0083976	SP100	HK1_TE:9475;HK1_TE:9477	1	2
2	left	231282500	231380000	0.0125576	0.0136424	SP100	HK1_TE:9483;HK1_TE:9484;HK1_TE:9485	1	3
2	right	231282500	231380000	0.0125576	0.0136424	RN7SL834P;HMGB1P3	HK1_TE:9482	2	1
2	right	231542500	231577500	9.19196e-06	9.50985e-06	AC098823.3;CAB39;BANF1P3	HK1_TE:9489;HK1_TE:9490;HK1_TE:9491;HK1_TE:9494	3	4
2	left	231975000	232025000	0.00247864	0.00266701	HTR2B	HK1_TE:9504	1	1
2	left	232377500	232572500	7.20906e-10	5.85774e-10	RNU2-22P;LINC00471	HK1_TE:9512	2	1
2	left	232780000	233007500	1.71532e-08	1.42721e-08	NPPC	HK1_TE:9516	1	1
2	right	233192500	233302500	8.25972e-07	1.17035e-06	DIS3L2P1	HK1_TE:9519;HK1_TE:9520	1	2
2	left	233717500	233892500	6.37632e-10	5.83238e-10	C2orf82	HK1_TE:9539;HK1_TE:9540;HK1_TE:9541;HK1_TE:9542	1	4
2	right	233717500	233892500	6.37632e-10	5.83238e-10	NGEF;NEU2	HK1_TE:9528;HK1_TE:9529;HK1_TE:9530;HK1_TE:9531	2	4
2	right	233852500	233892500	2.48316e-08	2.66548e-08	NGEF;NEU2	HK1_TE:9535;HK1_TE:9536;HK1_TE:9537;HK1_TE:9538	2	4
2	left	233935000	234155000	1.68397e-06	1.49388e-06	INPP5D	HK1_TE:9545;HK1_TE:9546;HK1_TE:9547;HK1_TE:9548;HK1_TE:9549;HK1_TE:9550;HK1_TE:9551;HK1_TE:9552	1	8
2	left	234119166	234155833	4.39435e-09	4.42523e-09	RN7SL32P;ATG16L1	HK1_TE:9545;HK1_TE:9546;HK1_TE:9547;HK1_TE:9548;HK1_TE:9549;HK1_TE:9550;HK1_TE:9551;HK1_TE:9552	2	8
2	left	234473750	234597500	0.000258212	0.00251694	USP40	HK1_TE:9568;HK1_TE:9569	1	2
2	right	234473750	234597500	0.000258212	0.00251694	UGT1A7;UGT1A6	HK1_TE:9567	2	1
2	right	234887500	235407500	0.00252149	0.0160059	ARL4C	HK1_TE:9574;HK1_TE:9575;HK1_TE:9576	1	3
2	right	235275000	235405000	6.7944e-08	3.50901e-05	ARL4C	HK1_TE:9610;HK1_TE:9611;HK1_TE:9612	1	3
2	left	235332500	235402500	5.96206e-07	4.42523e-09	AC097713.3	HK1_TE:9622;HK1_TE:9623	1	2
2	right	235332500	235402500	5.96206e-07	4.42523e-09	ARL4C	HK1_TE:9613;HK1_TE:9614;HK1_TE:9615	1	3
2	right	235789500	235862500	1.47558e-08	1.48427e-08	SH3BP4	HK1_TE:9635;HK1_TE:9636;HK1_TE:9637;HK1_TE:9638;HK1_TE:9639;HK1_TE:9640;HK1_TE:9641	1	7
2	left	238035000	238395000	0.00179393	0.00170781	AC107079.1	HK1_TE:9710;HK1_TE:9711	1	2
2	right	238035000	238395000	0.00179393	0.00170781	MLPH	HK1_TE:9692	1	1
2	left	238770000	238832500	7.40721e-08	3.54698e-10	RAMP1;SNORD39	HK1_TE:9727;HK1_TE:9728	2	2
2	right	239077500	239112500	0.00367096	0.000107722	ILKAP	HK1_TE:9731;HK1_TE:9732;HK1_TE:9733	1	3
2	left	241194166	241315833	2.80551e-06	7.54171e-05	AC124861.1;AC124861.2	HK1_TE:9773;HK1_TE:9774;HK1_TE:9775;HK1_TE:9776;HK1_TE:9777;HK1_TE:9778;HK1_TE:9779	2	7
2	right	241313750	241373750	3.74235e-19	3.15951e-19	GPC1	HK1_TE:9773;HK1_TE:9774;HK1_TE:9775;HK1_TE:9776;HK1_TE:9777;HK1_TE:9778	1	6
2	right	241377500	241502500	0.00107522	0.00103268	ANKMY1;DUSP28;RNPEPL1	HK1_TE:9780;HK1_TE:9781;HK1_TE:9782;HK1_TE:9783;HK1_TE:9784;HK1_TE:9785;HK1_TE:9786;HK1_TE:9787;HK1_TE:9788	3	9
2	left	241795000	241935000	0.000108308	0.000118409	AGXT	HK1_TE:9798	1	1
2	left	242087500	242252500	7.5347e-06	7.73116e-05	PASK;PPP1R7	HK1_TE:9804;HK1_TE:9805	2	2
2	right	242212500	242257500	0.000220834	0.00376037	HDLBP;SEPT2	HK1_TE:9800;HK1_TE:9801	2	2
2	left	242447500	242642500	9.08604e-09	7.3566e-09	STK25	HK1_TE:9815	1	1
2	right	242675000	242825000	4.82989e-09	6.32664e-12	CXXC11;AC131097.3	HK1_TE:9816	2	1
15	left	29962500	30140000	1.27911e-09	5.38479e-12	RP11-680F8.1	HK1_TE:41244;HK1_TE:41245;HK1_TE:41246;HK1_TE:41247;HK1_TE:41248;HK1_TE:41249;HK1_TE:41250;HK1_TE:41251;HK1_TE:41252;HK1_TE:41253;HK1_TE:41254	1	11
15	left	30025000	30105000	2.86952e-05	3.08788e-05	RP11-680F8.4;HMGN2P5	HK1_TE:41235;HK1_TE:41236;HK1_TE:41237;HK1_TE:41238;HK1_TE:41239;HK1_TE:41240;HK1_TE:41241;HK1_TE:41242;HK1_TE:41243	2	9
15	right	30025000	30105000	2.86952e-05	3.08788e-05	RP11-680F8.3	HK1_TE:41227	1	1
15	left	30105000	30140000	1.56707e-06	1.64114e-06	RP11-680F8.3	HK1_TE:41244;HK1_TE:41245;HK1_TE:41246;HK1_TE:41247;HK1_TE:41248;HK1_TE:41249;HK1_TE:41250;HK1_TE:41251;HK1_TE:41252;HK1_TE:41253;HK1_TE:41254	1	11
15	left	31512500	31762500	1.61773e-11	1.39583e-11	RP11-16E12.1;RP11-16E12.2	HK1_TE:41277	2	1
15	left	31620833	31689166	0.000220834	0.000230206	KLF13	HK1_TE:41271	1	1
15	left	32951666	33121666	3.94776e-09	3.51716e-09	RP11-1000B6.2	HK1_TE:41289;HK1_TE:41290	1	2
15	right	32951666	33121666	3.94776e-09	3.51716e-09	RP11-758N13.3	HK1_TE:41284;HK1_TE:41285;HK1_TE:41286;HK1_TE:41287	1	4
15	right	33525000	34025000	6.56792e-07	1.59773e-12	Y_RNA	HK1_TE:41303;HK1_TE:41304;HK1_TE:41305	1	3
15	right	34525000	34887500	4.24658e-12	1.58423e-08	GOLGA8A;GOLGA8B;SNORA18	HK1_TE:41314;HK1_TE:41315;HK1_TE:41316	3	3
15	right	34522500	34634166	0.00145157	0.00146843	SLC12A6;NOP10;NUTM1	HK1_TE:41314;HK1_TE:41315;HK1_TE:41316	3	3
15	right	36667500	36762500	0.000212862	0.000214472	RP11-475A13.1	HK1_TE:41338;HK1_TE:41339;HK1_TE:41340;HK1_TE:41341;HK1_TE:41342	1	5
15	left	39465000	39730000	0.0516811	0.00248955	RP11-265N7.2	HK1_TE:41393	1	1
15	right	39590833	39872500	0.0125576	0.000100568	THBS1;CTD-2033D15.1	HK1_TE:41384;HK1_TE:41385;HK1_TE:41386;HK1_TE:41387;HK1_TE:41388	2	5
15	left	40075000	40335000	0.00804088	5.73174e-07	FSIP1;RP11-37C7.3	HK1_TE:41414;HK1_TE:41415;HK1_TE:41416;HK1_TE:41417	2	4
15	left	40335000	40455000	4.85588e-07	4.98874e-07	SRP14;SRP14-AS1	HK1_TE:41427;HK1_TE:41428;HK1_TE:41429;HK1_TE:41430;HK1_TE:41431;HK1_TE:41432	2	6
15	right	40335000	40455000	4.85588e-07	4.98874e-07	BUB1B	HK1_TE:41414;HK1_TE:41415;HK1_TE:41416;HK1_TE:41417	1	4
15	left	40337500	40398500	7.81402e-11	8.28815e-11	SRP14;SRP14-AS1	HK1_TE:41420;HK1_TE:41421;HK1_TE:41422;HK1_TE:41423	2	4
15	right	40337500	40398500	7.81402e-11	8.28815e-11	BMF	HK1_TE:41414;HK1_TE:41415;HK1_TE:41416;HK1_TE:41417	1	4
15	left	40572500	40622500	0.000805646	0.000868542	ANKRD63	HK1_TE:41448;HK1_TE:41449;HK1_TE:41450;HK1_TE:41451;HK1_TE:41452;HK1_TE:41453;HK1_TE:41454;HK1_TE:41455;HK1_TE:41456	1	9
15	right	40572500	40622500	0.000805646	0.000868542	LINC00984;C15orf52;RNA5SP392	HK1_TE:41444;HK1_TE:41445;HK1_TE:41446;HK1_TE:41447	3	4
15	right	40635000	40985000	0.00220589	0.0021394	RAD51-AS1;RAD51	HK1_TE:41452;HK1_TE:41453;HK1_TE:41454;HK1_TE:41455;HK1_TE:41456	2	5
15	left	40632500	40732500	1.87481e-08	1.50328e-06	C15orf52;RNA5SP392;PHGR1	HK1_TE:41458	3	1
15	right	40632500	40732500	1.87481e-08	1.50328e-06	BAHD1;RP11-64K12.9	HK1_TE:41451;HK1_TE:41452;HK1_TE:41453;HK1_TE:41454;HK1_TE:41455;HK1_TE:41456	2	6
15	right	40890000	40987500	0.00190502	0.00191662	RAD51-AS1;RAD51	HK1_TE:41460;HK1_TE:41461	2	2
15	left	41037500	41077500	0.00016076	4.44343e-06	RMDN3	HK1_TE:41462;HK1_TE:41463;HK1_TE:41464;HK1_TE:41465;HK1_TE:41466;HK1_TE:41467;HK1_TE:41468;HK1_TE:41469;HK1_TE:41470;HK1_TE:41471	1	10
15	left	41146250	41186250	2.14218e-23	2.2068e-23	RP11-532F12.5;SPINT1	HK1_TE:41480;HK1_TE:41481	2	2
15	right	41146250	41186250	2.14218e-23	2.2068e-23	VPS18;RP11-540O11.1	HK1_TE:41477;HK1_TE:41478;HK1_TE:41479	2	3
15	left	41707500	41785000	0.00808291	0.0083976	NDUFAF1;RTF1	HK1_TE:41495;HK1_TE:41496	2	2
15	left	42062500	42195000	4.11602e-07	0.000137358	RP11-107F6.3;MAPKBP1;AC073657.1	HK1_TE:41501;HK1_TE:41502	3	2
15	right	42230000	42265000	1.78631e-05	9.92731e-08	EHD4;CTD-2382E5.1	HK1_TE:41503;HK1_TE:41504;HK1_TE:41505;HK1_TE:41506;HK1_TE:41507	2	5
15	left	42867500	43117500	0.000394877	0.000365355	RP11-265N6.2;RP11-265N6.3;STARD9;RP11-265N6.4	HK1_TE:41520;HK1_TE:41521;HK1_TE:41522;HK1_TE:41523;HK1_TE:41524;HK1_TE:41525;HK1_TE:41526;HK1_TE:41527;HK1_TE:41531	4	9
15	right	43182500	43227500	2.10534e-07	2.27903e-07	TTBK2;FDPSP4	HK1_TE:41532;HK1_TE:41533;HK1_TE:41534;HK1_TE:41535;HK1_TE:41536	2	5
15	left	43392500	43427500	0.000366955	0.0067623	UBR1	HK1_TE:41547	1	1
15	right	43392500	43427500	0.000366955	0.0067623	TMEM62;SPCS2P1	HK1_TE:41545;HK1_TE:41546	2	2
15	left	43427500	43470000	0.0181545	0.000571758	TMEM62;SPCS2P1	HK1_TE:41549;HK1_TE:41550;HK1_TE:41551;HK1_TE:41552;HK1_TE:41553	2	5
15	right	43427500	43470000	0.0181545	0.000571758	RP11-473C18.3;CCNDBP1	HK1_TE:41547	2	1
15	left	44117500	44827500	0.000220834	1.85699e-07	MFAP1;WDR76	HK1_TE:41602;HK1_TE:41603	2	2
15	right	44450833	44490833	7.27511e-07	6.87811e-07	FRMD5	HK1_TE:41584;HK1_TE:41585;HK1_TE:41586;HK1_TE:41587	1	4
15	left	45009166	45077500	1.3929e-10	1.1321e-08	PATL2;B2M;TRIM69	HK1_TE:41610	3	1
15	left	45417500	45457500	0.00172072	0.00183873	DUOX2;DUOXA2;DUOXA1;DUOX1	HK1_TE:41615;HK1_TE:41616	4	2
15	left	45422500	45492500	2.61502e-05	2.58117e-05	DUOXA1;DUOX1	HK1_TE:41617	2	1
15	right	45457500	45692500	5.56385e-06	4.98605e-06	GATM;SPATA5L1	HK1_TE:41615;HK1_TE:41616	2	2
15	left	45498333	45558333	0.000289064	0.000324021	SHF;CTD-2651B20.7;CTD-2651B20.6;SNORA11;CTD-2651B20.2	HK1_TE:41618;HK1_TE:41619	5	2
15	right	45498333	45558333	0.000289064	0.000324021	CTD-2651B20.3;SLC28A2	HK1_TE:41617	2	1
15	right	45494166	45694166	6.57103e-18	5.76812e-18	GATM;SPATA5L1	HK1_TE:41617	2	1
15	left	45877500	45930000	0.00694757	0.00740321	BLOC1S6;RP11-96O20.4;Y_RNA	HK1_TE:41626;HK1_TE:41627;HK1_TE:41628;HK1_TE:41629;HK1_TE:41630;HK1_TE:41631;HK1_TE:41632;HK1_TE:41633	3	8
15	left	45937500	46212500	0.00310653	2.59054e-06	SQRDL	HK1_TE:41638;HK1_TE:41639;HK1_TE:41640	1	3
15	right	47755000	47807500	0.00125972	0.00133372	RP11-142J21.2	HK1_TE:41648	1	1
15	left	47805000	47975000	6.95308e-08	7.97981e-06	RP11-142J21.2	HK1_TE:41655;HK1_TE:41656	1	2
15	right	48974166	49015833	1.86018e-12	1.73557e-09	RP11-227D13.2;RP11-227D13.4	HK1_TE:41668;HK1_TE:41669;HK1_TE:41670;HK1_TE:41671;HK1_TE:41672	2	5
15	left	49157500	49257500	7.55773e-05	2.60212e-06	EID1;AC012379.1	HK1_TE:41678;HK1_TE:41679	2	2
15	right	49157500	49257500	7.55773e-05	2.60212e-06	SHC4;KRT8P24	HK1_TE:41676	2	1
15	right	49154166	49442500	0.00221918	0.00220262	COPS2;Y_RNA;GALK2;NDUFAF4P1	HK1_TE:41676	4	1
15	left	50647500	51177500	1.487e-06	1.89137e-05	GABPB1;U6;GABPB1-AS1;CTD-3110H11.1;MIR4712	HK1_TE:41699;HK1_TE:41700;HK1_TE:41701;HK1_TE:41702;HK1_TE:41703;HK1_TE:41704	5	6
15	left	51202500	51482500	1.76179e-05	0.000141293	AP4E1	HK1_TE:41714;HK1_TE:41715	1	2
15	left	51332500	51412500	0.000328442	0.000312848	RP11-108K3.1	HK1_TE:41712	1	1
15	right	51457500	51672500	8.19217e-05	7.73116e-05	RP11-108K3.4	HK1_TE:41713	1	1
15	right	51787500	51892500	0.00354321	0.0036095	AC020892.1	HK1_TE:41726;HK1_TE:41727	1	2
15	left	52128750	52173125	5.67552e-10	5.94204e-10	TMOD3	HK1_TE:41737;HK1_TE:41738;HK1_TE:41739;HK1_TE:41740;HK1_TE:41741;HK1_TE:41742;HK1_TE:41743;HK1_TE:41744;HK1_TE:41745;HK1_TE:41746;HK1_TE:41749	1	11
15	right	52128750	52173125	5.67552e-10	5.94204e-10	Y_RNA	HK1_TE:41733;HK1_TE:41734	1	2
15	left	52275000	52370000	2.20136e-16	1.1432e-10	LEO1	HK1_TE:41764;HK1_TE:41765;HK1_TE:41766;HK1_TE:41767;HK1_TE:41768;HK1_TE:41769;HK1_TE:41770;HK1_TE:41771;HK1_TE:41772;HK1_TE:41773;HK1_TE:41774;HK1_TE:41775	1	12
15	right	52275000	52370000	2.20136e-16	1.1432e-10	CTD-2184D3.3	HK1_TE:41750;HK1_TE:41751	1	2
15	left	52297083	52363333	2.13925e-08	2.04809e-08	CTD-2650P22.1	HK1_TE:41764;HK1_TE:41765;HK1_TE:41766;HK1_TE:41767;HK1_TE:41768;HK1_TE:41769;HK1_TE:41770;HK1_TE:41771;HK1_TE:41772;HK1_TE:41773;HK1_TE:41774	1	11
15	right	52297083	52363333	2.13925e-08	2.04809e-08	CTD-2184D3.3	HK1_TE:41751;HK1_TE:41752;HK1_TE:41753;HK1_TE:41754;HK1_TE:41755;HK1_TE:41756;HK1_TE:41757;HK1_TE:41758	1	8
15	left	52392500	52432500	0.000228491	0.000230896	CTD-2184D3.5;CTD-2184D3.1;BCL2L10	HK1_TE:41784;HK1_TE:41785	3	2
15	left	52815000	52855000	0.00172072	0.00183873	MYO5A	HK1_TE:41809;HK1_TE:41810;HK1_TE:41811;HK1_TE:41812;HK1_TE:41813	1	5
15	right	52815000	52855000	0.00172072	0.00183873	ARPP19	HK1_TE:41807;HK1_TE:41808	1	2
15	right	52854166	52995833	1.21505e-08	1.19598e-08	FAM214A	HK1_TE:41809;HK1_TE:41810;HK1_TE:41811;HK1_TE:41812;HK1_TE:41813	1	5
15	right	56195000	56535000	0.000370267	0.000348895	RFX7;TEX9	HK1_TE:41831;HK1_TE:41832;HK1_TE:41833;HK1_TE:41834;HK1_TE:41835;HK1_TE:41836;HK1_TE:41837;HK1_TE:41838;HK1_TE:41839;HK1_TE:41840	2	10
15	right	57105000	57595000	0.0224035	0.00196099	LINC00926	HK1_TE:41852	1	1
15	right	57852500	57997500	1.11207e-06	9.78406e-07	RP11-344A16.2	HK1_TE:41875;HK1_TE:41876;HK1_TE:41877;HK1_TE:41878;HK1_TE:41879	1	5
15	left	57852500	57902500	1.20565e-22	1.11339e-22	CTD-2515H24.1	HK1_TE:41880	1	1
15	right	58622500	58812500	9.3353e-09	9.15597e-06	RP11-50C13.2	HK1_TE:41891;HK1_TE:41892	1	2
15	left	59472500	59662500	0.000106711	0.000100568	MIR2116	HK1_TE:41921;HK1_TE:41922;HK1_TE:41923;HK1_TE:41924;HK1_TE:41925	1	5
15	right	59472500	59662500	0.000106711	0.000100568	MYO1E;RP11-356M20.3;FAM81A	HK1_TE:41912;HK1_TE:41913;HK1_TE:41914;HK1_TE:41915;HK1_TE:41916	3	5
15	right	60125000	60815000	0.00711511	0.00802665	CTD-2501E16.2	HK1_TE:41934;HK1_TE:41935;HK1_TE:41936	1	3
15	right	60122500	60687500	1.48317e-06	1.66382e-06	ANXA2;RP11-745A24.1;RP11-745A24.2	HK1_TE:41934;HK1_TE:41935;HK1_TE:41936	3	3
15	left	60687500	60812500	7.54431e-07	7.09813e-07	ANXA2;RP11-745A24.1;RP11-745A24.2	HK1_TE:41971;HK1_TE:41972;HK1_TE:41973;HK1_TE:41974;HK1_TE:41975;HK1_TE:41976;HK1_TE:41977	3	7
15	right	60687500	60812500	7.54431e-07	7.09813e-07	CTD-2501E16.2	HK1_TE:41959;HK1_TE:41960;HK1_TE:41961;HK1_TE:41962;HK1_TE:41963;HK1_TE:41964	1	6
15	left	62037500	62362500	2.70439e-06	0.00117732	AC018618.1	HK1_TE:41987;HK1_TE:41988	1	2
15	right	62037500	62362500	2.70439e-06	0.00117732	VPS13C;RP11-643M14.1;C2CD4A;NPM1P47	HK1_TE:41981;HK1_TE:41982;HK1_TE:41983	4	3
15	left	62361666	62406666	4.37449e-06	4.71409e-06	VPS13C;RP11-643M14.1;C2CD4A;NPM1P47	HK1_TE:41989;HK1_TE:41990;HK1_TE:41991;HK1_TE:41992;HK1_TE:41993	4	5
15	right	63062500	63387500	0.000935164	6.83078e-05	RP11-69G7.1	HK1_TE:42009;HK1_TE:42010;HK1_TE:42011	1	3
15	left	63759166	63799166	0.0108544	0.0107286	AC007950.1	HK1_TE:42040;HK1_TE:42041;HK1_TE:42042;HK1_TE:42043;HK1_TE:42044	1	5
15	left	64709166	64747500	0.000589747	0.000571758	RN7SL707P	HK1_TE:42059;HK1_TE:42060	1	2
15	right	64709166	64747500	0.000589747	0.000571758	Y_RNA;ZNF609;RP11-702L15.4	HK1_TE:42056;HK1_TE:42057;HK1_TE:42058	3	3
15	left	65332142	65585000	4.22807e-06	1.28236e-08	MTFMT;RP11-325L12.5;SLC51B	HK1_TE:42066;HK1_TE:42067;HK1_TE:42068	3	3
15	left	66647500	66762500	3.83573e-06	0.000294535	SCARNA14;Y_RNA	HK1_TE:42081;HK1_TE:42082;HK1_TE:42083;HK1_TE:42084;HK1_TE:42085	2	5
15	right	66675000	66795000	4.91691e-09	5.12414e-09	CTD-3185P2.2;CTD-3185P2.1;SNAPC5;MIR4512;SNORD18C;SNORD18B;SNORD16;SNORD18A;ZWILCH	HK1_TE:42080	9	1
15	left	67237500	68137500	1.4851e-07	3.67433e-05	RP11-798K3.3	HK1_TE:42132	1	1
15	right	67237500	68137500	1.4851e-07	3.67433e-05	RP11-34F13.3;RP11-34F13.2;RNU6-1	HK1_TE:42097;HK1_TE:42098;HK1_TE:42099;HK1_TE:42100;HK1_TE:42101	3	5
15	left	67245000	67455000	3.40881e-14	1.69251e-10	RP11-798K3.3	HK1_TE:42122;HK1_TE:42123;HK1_TE:42124;HK1_TE:42125;HK1_TE:42126;HK1_TE:42127	1	6
15	left	67357500	67397500	1.58176e-17	1.73866e-12	RP11-798K3.2;SMAD3	HK1_TE:42108;HK1_TE:42109;HK1_TE:42110;HK1_TE:42111;HK1_TE:42112;HK1_TE:42113;HK1_TE:42114;HK1_TE:42115;HK1_TE:42116;HK1_TE:42117;HK1_TE:42118	2	11
15	right	67397500	67442500	2.29284e-10	2.49229e-10	RP11-342M21.2	HK1_TE:42108;HK1_TE:42109;HK1_TE:42110;HK1_TE:42111;HK1_TE:42112;HK1_TE:42113;HK1_TE:42114;HK1_TE:42115;HK1_TE:42116;HK1_TE:42117;HK1_TE:42118	1	11
15	left	68347500	68417500	0.00283092	0.00302692	PIAS1	HK1_TE:42134;HK1_TE:42135	1	2
15	left	68565000	68935000	0.000370267	0.000348895	RP11-315D16.4;FEM1B	HK1_TE:42151;HK1_TE:42152	2	2
15	left	68600500	68671500	0.000328442	0.000312848	RP11-709B3.2	HK1_TE:42145;HK1_TE:42146	1	2
15	right	68932500	69112500	2.25796e-10	2.92981e-07	ANP32A;SPESP1;RP11-696L21.2	HK1_TE:42151;HK1_TE:42152	3	2
15	right	69352500	69707500	0.000593174	7.72895e-05	RP11-253M7.1;Y_RNA;KIF23	HK1_TE:42158	3	1
15	left	69455000	69555000	0.00156985	1.15125e-05	GLCE;AC026512.1	HK1_TE:42161	2	1
15	left	69725000	72512500	9.00892e-05	1.2101e-05	RP11-253M7.3	HK1_TE:42244;HK1_TE:42245;HK1_TE:42246;HK1_TE:42247	1	4
15	right	69760000	69887500	0.00107522	0.000141293	RP11-279F6.3	HK1_TE:42162;HK1_TE:42163;HK1_TE:42164	1	3
15	left	69765000	70485000	0.002215	0.000245233	U3;RP11-253M7.4;RP11-279F6.1	HK1_TE:42172;HK1_TE:42173;HK1_TE:42174	3	3
15	right	69765000	70485000	0.002215	0.000245233	RNU6-745P;AC011648.1	HK1_TE:42162;HK1_TE:42163;HK1_TE:42164	2	3
15	left	69885000	70392500	1.1567e-08	2.43799e-07	RP11-279F6.3	HK1_TE:42167;HK1_TE:42168;HK1_TE:42169;HK1_TE:42170;HK1_TE:42171	1	5
15	left	71122500	71182500	0.0035246	0.000230206	RP11-138H8.7	HK1_TE:42198;HK1_TE:42199;HK1_TE:42200	1	3
15	right	71122500	71182500	0.0035246	0.000230206	THAP10	HK1_TE:42194;HK1_TE:42195;HK1_TE:42196	1	3
15	left	71342500	71737500	6.11173e-12	1.20577e-09	RPL5P3	HK1_TE:42219;HK1_TE:42220	1	2
15	left	71342500	71587500	4.83983e-06	4.43263e-06	RPL5P3	HK1_TE:42215	1	1
15	left	71343750	71390000	4.85931e-05	4.93114e-05	RPL5P3	HK1_TE:42205;HK1_TE:42206;HK1_TE:42207;HK1_TE:42208	1	4
15	right	71343750	71390000	4.85931e-05	4.93114e-05	THSD4	HK1_TE:42201;HK1_TE:42202;HK1_TE:42203;HK1_TE:42204	1	4
15	left	71400000	72087500	0.000330097	0.0238414	THSD4;CT62	HK1_TE:42235;HK1_TE:42236;HK1_TE:42237	2	3
15	right	71400000	72087500	0.000330097	0.0238414	NR2E3	HK1_TE:42205;HK1_TE:42206;HK1_TE:42207;HK1_TE:42208	1	4
15	right	72040000	72445000	0.000921104	3.05995e-05	RP11-2I17.4	HK1_TE:42233;HK1_TE:42234	1	2
15	right	72039500	72089500	1.92673e-18	1.96134e-18	NR2E3	HK1_TE:42233;HK1_TE:42234	1	2
15	left	72162500	72437500	6.55248e-05	2.40105e-09	RNA5SP399	HK1_TE:42240	1	1
15	left	72512500	74287500	0.00150484	0.000174485	PKM	HK1_TE:42273;HK1_TE:42274;HK1_TE:42275	1	3
15	right	72512500	74287500	0.00150484	0.000174485	STOML1;PML	HK1_TE:42244;HK1_TE:42245;HK1_TE:42246;HK1_TE:42247	2	4
15	right	72500000	72560000	0.000321789	0.000345325	PARP6;RP11-106M3.3	HK1_TE:42241;HK1_TE:42242;HK1_TE:42243;HK1_TE:42244;HK1_TE:42245;HK1_TE:42246	2	6
15	right	72519166	72562500	0.000477668	0.000480229	PARP6;RP11-106M3.3	HK1_TE:42244;HK1_TE:42245;HK1_TE:42246;HK1_TE:42247;HK1_TE:42248;HK1_TE:42249	2	6
15	left	72667500	72767500	1.27441e-09	1.25564e-09	RP11-106M3.2;HEXA;HEXA-AS1;RP11-106M3.1	HK1_TE:42253;HK1_TE:42254	4	2
15	right	73857500	73988750	3.58784e-09	3.92114e-11	CD276	HK1_TE:42260;HK1_TE:42261	1	2
15	right	73892500	73927500	9.1596e-06	0.00184976	NPTN	HK1_TE:42262;HK1_TE:42263	1	2
15	left	73932142	73984642	5.15423e-26	6.15047e-33	NPTN	HK1_TE:42270	1	1
15	right	73932142	73984642	5.15423e-26	6.15047e-33	CD276	HK1_TE:42264;HK1_TE:42265;HK1_TE:42266;HK1_TE:42267;HK1_TE:42268;HK1_TE:42269	1	6
15	right	74285000	74905000	0.00252711	0.00330058	CLK3;CTD-3154N5.1	HK1_TE:42273;HK1_TE:42274;HK1_TE:42275	2	3
15	left	74285000	74817500	0.00153413	0.00628062	STOML1;PML	HK1_TE:42293;HK1_TE:42294;HK1_TE:42295;HK1_TE:42296;HK1_TE:42297;HK1_TE:42298	2	6
15	left	74667500	74837500	8.2875e-07	1.1321e-08	CYP11A1;CTD-2311M21.3	HK1_TE:42296;HK1_TE:42297;HK1_TE:42298	2	3
15	left	74667500	75062500	1.48317e-06	1.51788e-05	CYP11A1;CTD-2311M21.3	HK1_TE:42310;HK1_TE:42311;HK1_TE:42312;HK1_TE:42313;HK1_TE:42314;HK1_TE:42315	2	6
15	left	74835000	75085000	0.00179393	5.00013e-05	ARID3B	HK1_TE:42316;HK1_TE:42317;HK1_TE:42318;HK1_TE:42319;HK1_TE:42320;HK1_TE:42321;HK1_TE:42322;HK1_TE:42323;HK1_TE:42324;HK1_TE:42325;HK1_TE:42326	1	11
15	right	74835000	75085000	0.00179393	5.00013e-05	CSK;MIR4513	HK1_TE:42296;HK1_TE:42297;HK1_TE:42298	2	3
15	right	75065000	75240000	0.00355792	5.26111e-05	COX5A;RPP25;SCAMP5	HK1_TE:42310;HK1_TE:42311;HK1_TE:42312;HK1_TE:42313;HK1_TE:42314;HK1_TE:42315;HK1_TE:42316;HK1_TE:42317	3	8
15	left	75062500	75137500	0.00172072	0.00183873	CSK	HK1_TE:42329	1	1
15	right	75062500	75137500	0.00172072	0.00183873	ULK3	HK1_TE:42310;HK1_TE:42311;HK1_TE:42312;HK1_TE:42313;HK1_TE:42314;HK1_TE:42315	1	6
15	right	75080000	75190000	0.000996747	0.000998204	MPI;FAM219B;CTD-2235H24.2	HK1_TE:42316;HK1_TE:42317;HK1_TE:42318;HK1_TE:42319;HK1_TE:42320;HK1_TE:42321;HK1_TE:42322;HK1_TE:42323;HK1_TE:42324;HK1_TE:42325	3	10
15	left	75092500	75137500	0.000477668	0.000480229	MIR4513;LMAN1L	HK1_TE:42329	2	1
15	right	75092500	75137500	0.000477668	0.000480229	ULK3	HK1_TE:42316;HK1_TE:42317;HK1_TE:42318;HK1_TE:42319;HK1_TE:42320;HK1_TE:42321;HK1_TE:42322;HK1_TE:42323;HK1_TE:42324;HK1_TE:42325;HK1_TE:42326	1	11
15	right	75135000	75235000	1.72472e-06	0.000605215	COX5A;RPP25;SCAMP5	HK1_TE:42329	3	1
15	right	75141250	75192500	5.96206e-07	4.93114e-05	MPI;FAM219B;CTD-2235H24.2	HK1_TE:42330;HK1_TE:42331	3	2
15	left	75230000	75745000	4.36912e-06	4.29068e-06	COX5A	HK1_TE:42356;HK1_TE:42357;HK1_TE:42358	1	3
15	right	75325277	75495833	3.77804e-33	1.44722e-38	C15orf39;RP11-69H7.3	HK1_TE:42335;HK1_TE:42336;HK1_TE:42337;HK1_TE:42338;HK1_TE:42339;HK1_TE:42340	2	6
15	right	75325000	75625000	1.20539e-05	1.39886e-05	ANP32BP1;COMMD4;NEIL1	HK1_TE:42335;HK1_TE:42336;HK1_TE:42337;HK1_TE:42338;HK1_TE:42339;HK1_TE:42340	3	6
15	right	75400000	75495000	6.61137e-12	6.42055e-12	C15orf39;RP11-69H7.3	HK1_TE:42343;HK1_TE:42344;HK1_TE:42345;HK1_TE:42346;HK1_TE:42347;HK1_TE:42348	2	6
15	left	75495000	75745000	1.9161e-05	2.54295e-07	C15orf39;RP11-69H7.3	HK1_TE:42356;HK1_TE:42357;HK1_TE:42358	2	3
15	left	75662500	75742500	9.38612e-08	2.7678e-10	RP11-817O13.6;MAN2C1;RP11-817O13.8	HK1_TE:42356;HK1_TE:42357;HK1_TE:42358	3	3
15	left	75747500	75807500	1.21592e-05	0.000394918	SIN3A	HK1_TE:42362	1	1
15	right	75747500	75807500	1.21592e-05	0.000394918	CTD-2323K18.2	HK1_TE:42356;HK1_TE:42357;HK1_TE:42358	1	3
15	left	75745000	75925000	9.38612e-08	9.92731e-08	SIN3A	HK1_TE:42366	1	1
15	right	75745000	75925000	9.38612e-08	9.92731e-08	SNUPN;CTD-2026K11.3;CTD-2026K11.2	HK1_TE:42356;HK1_TE:42357;HK1_TE:42358	3	3
15	left	75872500	75917500	0.00354321	0.0036095	PTPN9	HK1_TE:42366	1	1
15	right	76480000	76622500	0.00652191	0.00660905	ISL2;RP11-685G9.2;RP11-685G9.4	HK1_TE:42370;HK1_TE:42371	3	2
15	right	78595000	78730000	0.000220834	8.4562e-06	IREB2	HK1_TE:42389	1	1
15	left	78737500	79012500	0.000694696	3.80983e-06	IREB2	HK1_TE:42396	1	1
15	left	78762500	79187500	0.00153746	0.00227607	RP11-650L12.1	HK1_TE:42400	1	1
15	left	79012500	79162500	3.72515e-07	3.51434e-07	CHRNB4	HK1_TE:42399	1	1
15	right	79012500	79162500	3.72515e-07	3.51434e-07	RPL21P116	HK1_TE:42396	1	1
15	left	80187500	80467500	8.06088e-12	6.36055e-12	MTHFS	HK1_TE:42419;HK1_TE:42420;HK1_TE:42421;HK1_TE:42422	1	4
15	left	80355000	80470000	0.0019141	0.00193308	ZFAND6	HK1_TE:42421;HK1_TE:42422	1	2
15	right	80355000	80470000	0.0019141	0.00193308	RP11-2E17.2	HK1_TE:42416	1	1
15	right	80987500	81070000	0.00283092	0.00302692	KIAA1199	HK1_TE:42434;HK1_TE:42435;HK1_TE:42436;HK1_TE:42437;HK1_TE:42438	1	5
15	left	81290000	81615000	0.002215	0.0201414	MESDC2;RP11-775C24.3;MIR4514;MESDC1;C15orf26	HK1_TE:42456;HK1_TE:42457;HK1_TE:42458	5	3
15	right	83410000	83477500	0.0182713	0.0179087	FSD2;WHAMM	HK1_TE:42486	2	1
15	left	83954642	84046785	0	4.33248e-39	BNC1	HK1_TE:42505;HK1_TE:42506;HK1_TE:42507;HK1_TE:42508	1	4
15	right	85130000	85200000	0.00354321	0.000312848	WDR73;NMB	HK1_TE:42516;HK1_TE:42517	2	2
15	left	85200000	85292500	1.62876e-06	1.75779e-06	WDR73;NMB	HK1_TE:42521	2	1
15	left	85202500	85257500	4.27631e-06	4.44343e-06	WDR73;NMB	HK1_TE:42518;HK1_TE:42519	2	2
15	left	85495000	85585000	5.76224e-05	5.58451e-05	RNU6-339P;RNU6-796P;RP11-255M6.1	HK1_TE:42535;HK1_TE:42536	3	2
15	left	85525000	85585000	6.81953e-11	1.62791e-07	PDE8A	HK1_TE:42535;HK1_TE:42536	1	2
15	left	85877500	85955000	3.32465e-05	3.44204e-05	RP11-561C5.5	HK1_TE:42556;HK1_TE:42557;HK1_TE:42558;HK1_TE:42559;HK1_TE:42560;HK1_TE:42561	1	6
15	right	85877500	85955000	3.32465e-05	3.44204e-05	CTD-2262B20.1	HK1_TE:42544;HK1_TE:42545;HK1_TE:42546;HK1_TE:42547;HK1_TE:42548	1	5
15	left	85922500	85995000	0.00283092	0.00302692	AKAP13;RNU7-79P	HK1_TE:42563;HK1_TE:42564;HK1_TE:42565;HK1_TE:42566	2	4
15	right	87162500	88787500	0.000308165	0.000574585	NTRK3;NTRK3-AS1	HK1_TE:42585;HK1_TE:42586	2	2
15	left	89092500	89162500	0.00252149	0.000290788	DET1;AC013489.1	HK1_TE:42608	2	1
15	right	89092500	89162500	0.00252149	0.000290788	RP11-97O12.2;MIR1179;MIR7-2;AEN	HK1_TE:42607	4	1
15	left	89453333	89563333	1.47558e-08	1.48427e-08	HAPLN3;MFGE8	HK1_TE:42614	2	1
15	right	89612500	89659166	6.43427e-11	6.09738e-11	RNU7-195P	HK1_TE:42615;HK1_TE:42616;HK1_TE:42617	1	3
15	left	89632500	89672500	4.65977e-09	1.58805e-06	RP11-326A19.3;ABHD2	HK1_TE:42624;HK1_TE:42625;HK1_TE:42626;HK1_TE:42627;HK1_TE:42628;HK1_TE:42629	2	6
15	right	89632500	89672500	4.65977e-09	1.58805e-06	RNU7-195P;HMGB1P8	HK1_TE:42618;HK1_TE:42619;HK1_TE:42620;HK1_TE:42621;HK1_TE:42622	2	5
15	left	89667500	89712500	0.000305398	0.000294535	RNU7-195P;HMGB1P8	HK1_TE:42630;HK1_TE:42631	2	2
15	left	89902500	89937500	8.7073e-05	0.00183873	LINC00925;MIR9-3	HK1_TE:42634;HK1_TE:42635;HK1_TE:42636;HK1_TE:42637;HK1_TE:42638;HK1_TE:42639;HK1_TE:42640;HK1_TE:42641;HK1_TE:42642	2	9
15	left	89922500	89957500	6.92731e-05	0.00191662	MIR9-3	HK1_TE:42641;HK1_TE:42642;HK1_TE:42643	1	3
15	left	90137500	91537500	4.62242e-05	0.000126733	RP11-429B14.3	HK1_TE:42691	1	1
15	right	90290000	90640000	9.88058e-05	0.0021394	RP11-617F23.1;IDH2;CTD-2315E11.1	HK1_TE:42647	3	1
15	right	90323750	90390000	2.66526e-09	6.60691e-07	MIR5094	HK1_TE:42648;HK1_TE:42649;HK1_TE:42650;HK1_TE:42651	1	4
15	left	90447500	90620357	3.96541e-14	3.50333e-14	AP3S2;C15orf38-AP3S2;RNU7-111P;C15orf38	HK1_TE:42662	4	1
15	right	90850000	91437500	4.92042e-06	0.00087376	FES;MAN2A2	HK1_TE:42672	2	1
15	right	90862500	90907500	2.13594e-05	2.20414e-05	GABARAPL3;ZNF774	HK1_TE:42672;HK1_TE:42673	2	2
15	right	90885000	90950000	4.00414e-06	0.00168513	RP11-154B12.3	HK1_TE:42673;HK1_TE:42674;HK1_TE:42675;HK1_TE:42676;HK1_TE:42677	1	5
15	left	90907500	91022500	5.15225e-13	5.51528e-13	GABARAPL3;ZNF774	HK1_TE:42682;HK1_TE:42683	2	2
15	left	91192500	91427500	0.000394877	0.000365355	CTD-3065B20.1;RP11-387D10.3	HK1_TE:42690	2	1
15	right	91192500	91427500	0.000394877	0.000365355	FES	HK1_TE:42684;HK1_TE:42685	1	2
15	left	91262500	91415000	0.00145157	0.0136424	RP11-387D10.2;BLM	HK1_TE:42690	2	1
15	left	92395000	92620000	7.54431e-07	7.09813e-07	SLCO3A1	HK1_TE:42708	1	1
15	left	92403500	92496500	2.61502e-05	0.000569427	SLCO3A1	HK1_TE:42702;HK1_TE:42703;HK1_TE:42704;HK1_TE:42705;HK1_TE:42706;HK1_TE:42707	1	6
15	left	93345000	93525000	8.00745e-24	1.27837e-18	FAM174B;ASB9P1;CTD-2313J17.1	HK1_TE:42716;HK1_TE:42717	3	2
15	left	93347500	93467500	2.02113e-12	8.79215e-20	FAM174B;ASB9P1;CTD-2313J17.1	HK1_TE:42712;HK1_TE:42713;HK1_TE:42714;HK1_TE:42715	3	4
15	left	93353214	93445833	5.53012e-14	8.36716e-18	FAM174B;ASB9P1;CTD-2313J17.1	HK1_TE:42711;HK1_TE:42712;HK1_TE:42713	3	3
15	right	94720000	94780000	7.40721e-08	7.92352e-08	MCTP2	HK1_TE:42723;HK1_TE:42724;HK1_TE:42725;HK1_TE:42726	1	4
15	right	95220000	95565000	0.00107522	0.00103268	RP11-255M2.1	HK1_TE:42728;HK1_TE:42729;HK1_TE:42730	1	3
15	right	95805000	96895000	0.00114135	0.00174042	RP11-522B15.3;AC087477.1	HK1_TE:42741;HK1_TE:42742	2	2
15	right	96105000	96875000	0.000981937	6.52366e-05	NR2F2-AS1;NR2F2;MIR1469	HK1_TE:42743;HK1_TE:42744;HK1_TE:42745;HK1_TE:42746;HK1_TE:42747	3	5
15	left	96772500	96815000	1.14535e-05	1.22662e-05	RP11-327J17.1	HK1_TE:42759;HK1_TE:42760;HK1_TE:42761;HK1_TE:42762;HK1_TE:42763;HK1_TE:42764	1	6
15	left	96817500	96870000	0.000106518	0.000107722	AC016251.1	HK1_TE:42766;HK1_TE:42767;HK1_TE:42768;HK1_TE:42769	1	4
15	right	96817500	96870000	0.000106518	0.000107722	NR2F2-AS1;NR2F2;MIR1469	HK1_TE:42759;HK1_TE:42760;HK1_TE:42761;HK1_TE:42762;HK1_TE:42763;HK1_TE:42764	3	6
15	left	98452500	98720833	1.45635e-15	1.55993e-13	ARRDC4	HK1_TE:42794;HK1_TE:42795;HK1_TE:42796	1	3
15	left	98545000	98707500	7.73158e-08	2.60212e-06	RP11-753A21.1	HK1_TE:42793;HK1_TE:42794;HK1_TE:42795;HK1_TE:42796	1	4
15	left	99062500	99194166	1.47558e-08	7.14901e-11	FAM169B	HK1_TE:42805;HK1_TE:42806;HK1_TE:42807;HK1_TE:42808;HK1_TE:42809	1	5
15	right	99272500	99442500	0.000220834	8.4562e-06	RP11-654A16.1	HK1_TE:42814	1	1
15	right	99345000	99445000	7.85431e-06	8.29984e-06	RP11-654A16.1	HK1_TE:42827;HK1_TE:42828;HK1_TE:42829	1	3
15	left	99820000	100245000	9.08604e-09	4.98605e-06	HNRNPA1P62	HK1_TE:42859;HK1_TE:42860;HK1_TE:42861;HK1_TE:42862	1	4
15	left	100895000	101545000	2.14924e-06	1.65181e-07	ADAMTS17;SPATA41	HK1_TE:42887;HK1_TE:42888;HK1_TE:42889	2	3
15	left	101145000	101415000	0.00087174	5.07153e-06	LINS;ASB7	HK1_TE:42882;HK1_TE:42883;HK1_TE:42884;HK1_TE:42885	2	4
15	left	101142500	101547500	0.000212862	2.92981e-07	LINS;ASB7	HK1_TE:42887;HK1_TE:42888;HK1_TE:42889	2	3
15	left	101265000	101895000	0.000135044	5.60172e-05	RP11-66B24.5	HK1_TE:42899;HK1_TE:42900;HK1_TE:42901;HK1_TE:42902	1	4
15	right	101554500	101796500	6.80226e-13	4.36337e-15	CHSY1	HK1_TE:42887;HK1_TE:42888;HK1_TE:42889	1	3
15	right	101707500	101792500	6.92731e-05	7.43645e-05	CHSY1	HK1_TE:42896;HK1_TE:42897	1	2
15	left	101835000	102115000	4.72113e-08	4.06787e-08	SNRPA1;RP11-299G20.2	HK1_TE:42904;HK1_TE:42905;HK1_TE:42906;HK1_TE:42907	2	4
15	left	101839166	101900833	7.53704e-05	6.83078e-05	SNRPA1;RP11-299G20.2	HK1_TE:42899;HK1_TE:42900;HK1_TE:42901;HK1_TE:42902	2	4
21	left	15755000	16435000	1.0267e-06	3.60394e-05	HSPA13	HK1_TE:50412;HK1_TE:50413;HK1_TE:50414;HK1_TE:50415;HK1_TE:50416	1	5
21	right	16275000	16435000	4.22807e-06	0.000505776	NRIP1;AF127577.12	HK1_TE:50405;HK1_TE:50406;HK1_TE:50407;HK1_TE:50408	2	4
21	left	16437500	16590833	0.000106711	0.00146843	NRIP1;AF127577.12	HK1_TE:50417;HK1_TE:50418;HK1_TE:50419;HK1_TE:50420;HK1_TE:50421;HK1_TE:50422;HK1_TE:50423;HK1_TE:50424	2	8
21	left	17455000	17565000	5.33088e-06	5.07153e-06	LINC00478;VDAC2P1	HK1_TE:50452	2	1
21	left	18862500	18897500	2.69181e-06	9.07266e-05	RPL39P40	HK1_TE:50465;HK1_TE:50466;HK1_TE:50467	1	3
21	left	18885833	18979166	0.00252149	0.002365	RPL39P40;RN7SL163P;CXADR;BTF3L4P1;Y_RNA	HK1_TE:50468	5	1
21	right	18885833	18979166	0.00252149	0.002365	BTG3	HK1_TE:50465;HK1_TE:50466;HK1_TE:50467	1	3
21	left	26722500	26757500	0.000840034	0.000770561	AP001340.1;RPL13AP7	HK1_TE:50486	2	1
21	left	27762500	27812500	0.000366955	0.000394918	AP001596.6;AP001597.1	HK1_TE:50514	2	1
21	left	28220000	30117500	1.94661e-08	4.30727e-08	ADAMTS1	HK1_TE:50574;HK1_TE:50575;HK1_TE:50576;HK1_TE:50577;HK1_TE:50578;HK1_TE:50579;HK1_TE:50580	1	7
21	right	28220000	30117500	1.94661e-08	4.30727e-08	RNU6-872P	HK1_TE:50517;HK1_TE:50518;HK1_TE:50519;HK1_TE:50520	1	4
21	right	28220000	29425000	4.16876e-05	8.18601e-05	AL035610.1	HK1_TE:50517;HK1_TE:50518;HK1_TE:50519;HK1_TE:50520	1	4
21	right	28942500	29022500	2.69181e-06	2.60856e-06	AP001607.1	HK1_TE:50532;HK1_TE:50533;HK1_TE:50534;HK1_TE:50535;HK1_TE:50536	1	5
21	left	29087500	29712500	3.25773e-08	4.13921e-08	LINC00113	HK1_TE:50548;HK1_TE:50549;HK1_TE:50550;HK1_TE:50551;HK1_TE:50552	1	5
21	right	29707500	30117500	2.84275e-09	2.0385e-11	RNU6-872P	HK1_TE:50548;HK1_TE:50549;HK1_TE:50550;HK1_TE:50551;HK1_TE:50552	1	5
21	left	30455000	30535000	0.000971158	3.92727e-06	CCT8;MAP3K7CL	HK1_TE:50591;HK1_TE:50592;HK1_TE:50593	2	3
21	left	33652500	33970000	0.000593174	0.000582031	MIS18A;MIS18A-AS1;MRAP	HK1_TE:50648;HK1_TE:50649	3	2
21	right	33765000	34105000	8.77697e-11	8.73196e-07	SYNJ1;PAXBP1-AS1	HK1_TE:50634;HK1_TE:50635;HK1_TE:50636;HK1_TE:50637	2	4
21	left	33772000	33975000	2.66526e-09	7.36753e-15	URB1;C21orf119;EVA1C	HK1_TE:50648;HK1_TE:50649	3	2
21	right	33772000	33975000	2.66526e-09	7.36753e-15	AP000275.65;C21orf59	HK1_TE:50636;HK1_TE:50637	2	2
21	left	34697500	34805000	0.000543794	0.000569427	IFNAR1;USF1P1	HK1_TE:50654;HK1_TE:50655;HK1_TE:50656;HK1_TE:50657	2	4
21	right	34732500	34772500	2.61502e-05	2.58117e-05	IFNGR2	HK1_TE:50650;HK1_TE:50651	1	2
21	right	35015000	35280000	3.38388e-08	2.82963e-08	AP000304.12;ATP5O;LINC00649;RN7SL740P	HK1_TE:50658;HK1_TE:50660	4	2
21	left	35015000	35172500	3.32465e-05	7.94644e-07	CRYZL1;ITSN1	HK1_TE:50668;HK1_TE:50669	2	2
21	left	35304166	35344166	8.2875e-07	7.94644e-07	RN7SL740P	HK1_TE:50683;HK1_TE:50684;HK1_TE:50685;HK1_TE:50686	1	4
21	right	35304166	35344166	8.2875e-07	7.94644e-07	AP000569.9	HK1_TE:50676;HK1_TE:50677;HK1_TE:50678;HK1_TE:50679	1	4
21	left	35347500	35407500	2.62077e-10	9.92731e-08	AP000569.9	HK1_TE:50687	1	1
21	right	35742500	35990833	0.0182713	0.0179087	RCAN1	HK1_TE:50690;HK1_TE:50691	1	2
21	right	36255000	36985000	3.27433e-10	6.12544e-08	EZH2P1	HK1_TE:50705;HK1_TE:50706;HK1_TE:50707;HK1_TE:50708;HK1_TE:50709	1	5
21	right	36259166	36514166	0.0439336	0.00220262	AF015262.2	HK1_TE:50705;HK1_TE:50706;HK1_TE:50707;HK1_TE:50708;HK1_TE:50709	1	5
21	right	36421250	36513750	3.33902e-05	3.14579e-05	AF015262.2	HK1_TE:50714;HK1_TE:50715;HK1_TE:50716	1	3
21	left	36516250	36637500	3.33902e-05	0.000572385	AF015262.2	HK1_TE:50720;HK1_TE:50721;HK1_TE:50722;HK1_TE:50723;HK1_TE:50724;HK1_TE:50725;HK1_TE:50726;HK1_TE:50727;HK1_TE:50728;HK1_TE:50729;HK1_TE:50730;HK1_TE:50731	1	12
21	left	37587500	37696250	3.79764e-06	2.43564e-11	RN7SL73P	HK1_TE:50785;HK1_TE:50786;HK1_TE:50787;HK1_TE:50788;HK1_TE:50789;HK1_TE:50790	1	6
21	right	37587500	37696250	3.79764e-06	2.43564e-11	AP000692.10;MORC3	HK1_TE:50763;HK1_TE:50764;HK1_TE:50765;HK1_TE:50766;HK1_TE:50767;HK1_TE:50768;HK1_TE:50769;HK1_TE:50770;HK1_TE:50771;HK1_TE:50772;HK1_TE:50774	2	11
21	left	37585000	37635000	1.50601e-05	0.00417081	RN7SL73P	HK1_TE:50775;HK1_TE:50776;HK1_TE:50777	1	3
21	right	37585000	37635000	1.50601e-05	0.00417081	snoU13	HK1_TE:50763;HK1_TE:50764;HK1_TE:50765;HK1_TE:50766;HK1_TE:50767;HK1_TE:50768;HK1_TE:50769;HK1_TE:50770;HK1_TE:50771;HK1_TE:50772	1	10
21	right	37605000	37695000	2.10154e-09	2.16485e-09	AP000692.10;MORC3	HK1_TE:50773;HK1_TE:50774	2	2
21	right	37805000	37855000	1.62184e-05	1.71666e-05	AP000695.1;PSMD4P1	HK1_TE:50791;HK1_TE:50792;HK1_TE:50793;HK1_TE:50794	2	4
21	left	38232500	38282500	1.47558e-08	1.75779e-06	RNA5SP491	HK1_TE:50810;HK1_TE:50811;HK1_TE:50812;HK1_TE:50813;HK1_TE:50814	1	5
21	left	38447500	38742500	0.00221918	0.000365355	PIGP;TTC3	HK1_TE:50826;HK1_TE:50827;HK1_TE:50828	2	3
21	left	38635500	38741500	5.23904e-15	4.75302e-15	DSCR3;AP001412.1	HK1_TE:50826;HK1_TE:50827;HK1_TE:50828	2	3
21	right	38635500	38741500	5.23904e-15	4.75302e-15	AP001437.1;DYRK1A	HK1_TE:50822;HK1_TE:50823	2	2
21	left	38642500	38712500	1.62876e-06	1.75779e-06	DSCR3;AP001412.1	HK1_TE:50824;HK1_TE:50825	2	2
21	left	38725000	39625000	0.000787061	0.0248333	AP001437.1;DYRK1A	HK1_TE:50840;HK1_TE:50841	2	2
21	right	38725000	39625000	0.000787061	0.0248333	AP001434.2;SPATA20P1	HK1_TE:50824;HK1_TE:50825;HK1_TE:50826	2	3
21	left	39535000	39726250	1.31833e-15	1.24808e-18	KCNJ15	HK1_TE:50848;HK1_TE:50849	1	2
21	left	39589166	39724166	1.11207e-06	1.9163e-05	AP001425.14;DSCR10	HK1_TE:50848;HK1_TE:50849	2	2
21	left	39625000	40162500	4.60741e-09	6.03315e-09	AP001434.2;SPATA20P1	HK1_TE:50863;HK1_TE:50864	2	2
21	right	39625000	40162500	4.60741e-09	6.03315e-09	ETS2	HK1_TE:50840;HK1_TE:50841	1	2
21	right	39625000	40287500	0.0229779	0.0328269	AP001044.2	HK1_TE:50840;HK1_TE:50841	1	2
21	right	39662500	39860000	0.000148601	0.000141293	SNRPGP13	HK1_TE:50842;HK1_TE:50843;HK1_TE:50844;HK1_TE:50845;HK1_TE:50846;HK1_TE:50847	1	6
21	left	39875000	40510000	1.64626e-11	1.83076e-07	SNRPGP13	HK1_TE:50873;HK1_TE:50874;HK1_TE:50875;HK1_TE:50876	1	4
21	right	39875000	40510000	1.64626e-11	1.83076e-07	RPL23AP12	HK1_TE:50858	1	1
21	left	40105000	40505000	7.24025e-07	5.42466e-05	LINC00114	HK1_TE:50873;HK1_TE:50874;HK1_TE:50875;HK1_TE:50876	1	4
21	left	40119500	40175500	3.79764e-06	3.58794e-06	LINC00114	HK1_TE:50864	1	1
21	right	40119500	40175500	3.79764e-06	3.58794e-06	ETS2	HK1_TE:50862	1	1
21	left	40212500	41012500	8.20429e-07	2.49824e-06	AP001042.1	HK1_TE:50878;HK1_TE:50879;HK1_TE:50880;HK1_TE:50881	1	4
21	left	40285000	40505000	0.00355792	5.26111e-05	AP001044.2	HK1_TE:50873;HK1_TE:50874;HK1_TE:50875;HK1_TE:50876	1	4
21	left	40387500	40422500	0.00172072	0.00183873	AF064858.8;AF064858.11;AF064858.10	HK1_TE:50868;HK1_TE:50869;HK1_TE:50870;HK1_TE:50871	3	4
21	left	41005000	41047500	1.21592e-05	1.26465e-05	AF064860.5	HK1_TE:50882	1	1
21	right	43377500	43432500	0.000935164	0.000903509	ZBTB21;ZNF295-AS1	HK1_TE:50923;HK1_TE:50924	2	2
21	left	43435000	43485000	3.72836e-06	0.00104497	ZBTB21;ZNF295-AS1	HK1_TE:50926;HK1_TE:50927;HK1_TE:50928	2	3
21	left	44392500	44847500	0.0023906	0.00480671	AP001630.5;PKNOX1	HK1_TE:50970;HK1_TE:50971	2	2
21	left	44847500	45070000	0.00608815	3.14579e-05	SIK1	HK1_TE:50978;HK1_TE:50979;HK1_TE:50980;HK1_TE:50981;HK1_TE:50982	1	5
21	right	44847500	45070000	0.00608815	3.14579e-05	HSF2BP;RRP1B	HK1_TE:50970;HK1_TE:50971	2	2
21	left	45082500	45132500	0.00125972	0.00133372	HSF2BP;RRP1B	HK1_TE:50984	2	1
21	left	45140000	45197500	0.00283092	0.00302692	PDXK	HK1_TE:50986;HK1_TE:50987;HK1_TE:50988;HK1_TE:50989;HK1_TE:50990	1	5
21	right	45140000	45197500	0.00283092	0.00302692	CSTB;TMEM97P1;RRP1	HK1_TE:50984;HK1_TE:50985	3	2
21	right	45560833	45719166	4.13733e-14	3.61383e-14	AIRE;PFKL	HK1_TE:50992;HK1_TE:50993	2	2
21	right	45562500	45662500	9.87889e-06	0.000214472	ICOSLG;AP001059.5	HK1_TE:50992;HK1_TE:50993	2	2
21	left	46347500	46432500	0.0025542	0.000236297	ITGB2;ITGB2-AS1;LL21NC02-1C16.1;C21orf67;LL21NC02-1C16.2;FAM207A	HK1_TE:51009;HK1_TE:51010;HK1_TE:51011;HK1_TE:51012	6	4
21	right	46347500	46432500	0.0025542	0.000236297	LINC00162	HK1_TE:51005;HK1_TE:51006;HK1_TE:51007;HK1_TE:51008	1	4
21	left	46365000	46550000	4.14731e-07	1.43714e-09	ITGB2;LL21NC02-1C16.1;C21orf67;LL21NC02-1C16.2;FAM207A	HK1_TE:51015;HK1_TE:51016	5	2
21	left	46714166	46849166	9.87889e-06	9.15597e-06	POFUT2;BX322557.10;LINC00205;LINC00315	HK1_TE:51035;HK1_TE:51036	4	2
21	right	46714166	46849166	9.87889e-06	9.15597e-06	COL18A1-AS1	HK1_TE:51017;HK1_TE:51018	1	2
21	left	46710000	46965000	0.000334829	0.000370864	POFUT2;BX322557.10;LINC00205	HK1_TE:51039	3	1
21	right	46710000	46965000	0.000334829	0.000370864	SLC19A1	HK1_TE:51017;HK1_TE:51018	1	2
21	left	46787500	46825000	0.000477668	0.000480229	MTCO1P3;BX322559.3	HK1_TE:51033;HK1_TE:51034	2	2
21	right	46787500	46825000	0.000477668	0.000480229	COL18A1;COL18A1-AS2	HK1_TE:51025;HK1_TE:51026;HK1_TE:51027;HK1_TE:51028;HK1_TE:51029;HK1_TE:51030;HK1_TE:51032	2	7
21	left	46972500	47239500	1.71582e-09	1.37632e-09	SLC19A1	HK1_TE:51041	1	1
12	left	682500	1022500	1.88783e-13	1.69412e-13	RP5-1154L15.2	HK1_TE:35510	1	1
12	right	680000	1710000	0.00196638	0.000118409	FBXL14	HK1_TE:35491;HK1_TE:35492	1	2
12	left	682500	717500	0.000462426	0.00049863	RP5-1154L15.2	HK1_TE:35493;HK1_TE:35494	1	2
12	right	1062500	1712500	2.10828e-08	2.28103e-14	FBXL14	HK1_TE:35511;HK1_TE:35512	1	2
12	right	1059166	1097500	7.0251e-05	2.95712e-07	RAD52;RP11-359B12.2;ERC1	HK1_TE:35511;HK1_TE:35512	3	2
12	left	1095000	1225000	4.18364e-05	1.02224e-08	RAD52;RP11-359B12.2;ERC1	HK1_TE:35517;HK1_TE:35518;HK1_TE:35519;HK1_TE:35520;HK1_TE:35521	3	5
12	left	1112500	1227500	2.13594e-05	2.20414e-05	RAD52;RP11-359B12.2;ERC1;RN7SL852P	HK1_TE:35517;HK1_TE:35518;HK1_TE:35519;HK1_TE:35520;HK1_TE:35521	4	5
12	right	2745000	2915000	0.0317781	0.00170781	CBX3P4;FKBP4;RP4-816N1.6;RP4-816N1.7;ITFG2	HK1_TE:35548	5	1
12	right	2997000	3061000	4.29133e-06	4.65396e-06	RNU6-1315P;TEAD4	HK1_TE:35549	2	1
12	left	3187500	3277500	1.14535e-05	1.22662e-05	RP11-253E3.1;TSPAN9	HK1_TE:35552;HK1_TE:35553	2	2
12	right	3187500	3407500	2.69181e-06	4.6024e-08	RP5-1063M23.1	HK1_TE:35550	1	1
12	right	3277500	3567500	1.76179e-05	1.51788e-05	RP11-476M19.3;RP11-476M19.1	HK1_TE:35552;HK1_TE:35553	2	2
12	right	3327500	3567500	1.00434e-07	1.51788e-05	RP11-476M19.3;RP11-476M19.1	HK1_TE:35554;HK1_TE:35555	2	2
12	left	3565000	4145000	2.64376e-06	6.52366e-05	RP11-476M19.3;RP11-476M19.1	HK1_TE:35571;HK1_TE:35572;HK1_TE:35573	2	3
12	left	4145000	4387500	4.95717e-09	4.66247e-09	RP11-320N7.2	HK1_TE:35576	1	1
12	right	4145000	4387500	4.95717e-09	4.66247e-09	RP11-264F23.3;RP11-264F23.4;CCND2	HK1_TE:35571;HK1_TE:35572;HK1_TE:35573	3	3
12	left	4227500	4327500	0.000228491	0.000230896	RP11-320N7.1	HK1_TE:35574;HK1_TE:35575	1	2
12	right	5282500	5552500	4.93848e-08	3.01651e-10	NTF3	HK1_TE:35582;HK1_TE:35583;HK1_TE:35584;HK1_TE:35585;HK1_TE:35586;HK1_TE:35587;HK1_TE:35588	1	7
12	right	6285000	6330000	0.000762128	7.35531e-07	Y_RNA	HK1_TE:35600;HK1_TE:35601	1	2
12	left	6328750	6483750	1.71532e-08	2.58117e-05	Y_RNA	HK1_TE:35615;HK1_TE:35616;HK1_TE:35617;HK1_TE:35618	1	4
12	right	6328750	6483750	1.71532e-08	2.58117e-05	SCNN1A;LTBR	HK1_TE:35604;HK1_TE:35605;HK1_TE:35606;HK1_TE:35607;HK1_TE:35608;HK1_TE:35609;HK1_TE:35610;HK1_TE:35611;HK1_TE:35612;HK1_TE:35613;HK1_TE:35614	2	11
12	left	6447500	6642500	4.03298e-12	1.25564e-09	TNFRSF1A;RN7SL391P	HK1_TE:35622;HK1_TE:35623;HK1_TE:35624	2	3
12	right	6490000	6570000	0.00364439	0.0448248	CD27-AS1;TAPBPL;VAMP1	HK1_TE:35616;HK1_TE:35618	3	2
12	left	6532500	6657500	0.000106711	0.000100568	RP1-102E24.1	HK1_TE:35622;HK1_TE:35623;HK1_TE:35624;HK1_TE:35625	1	4
12	right	6532500	6657500	0.000106711	0.000100568	RP5-940J5.3;GAPDH;RP5-940J5.9;IFFO1;RP5-940J5.8	HK1_TE:35619;HK1_TE:35620	5	2
12	right	6532500	6592500	4.73512e-07	5.15085e-07	VAMP1;RP1-102E24.6;MRPL51;NCAPD2	HK1_TE:35619;HK1_TE:35620	4	2
12	right	6532500	6572500	6.4405e-12	8.09106e-09	CD27-AS1;TAPBPL;VAMP1;RP1-102E24.6	HK1_TE:35619;HK1_TE:35620	4	2
12	right	6622500	6692500	0.000127386	0.000138194	NOP2;RP5-940J5.6;SCARNA11	HK1_TE:35621	3	1
12	left	6789166	6872500	2.13925e-08	2.04809e-08	ZNF384	HK1_TE:35629	1	1
12	left	6840833	6880833	2.16635e-07	2.36479e-07	RP4-761J14.9;COPS7A;RP4-761J14.10	HK1_TE:35629;HK1_TE:35630	3	2
12	right	6840833	6880833	2.16635e-07	2.36479e-07	MLF2;PTMS;LAG3;RN7SL380P	HK1_TE:35626;HK1_TE:35627;HK1_TE:35628	4	3
12	right	6870000	7072500	1.27911e-09	1.20577e-09	EMG1;U47924.27;MIR200C;MIR141;U47924.29;PHB2;SCARNA12	HK1_TE:35628	7	1
12	right	7032500	7127500	8.2875e-07	3.44204e-05	LPCAT3;RP3-461F17.1	HK1_TE:35633;HK1_TE:35634	2	2
12	right	8185500	8233500	5.15141e-19	1.16017e-24	C3AR1;NECAP1	HK1_TE:35646	2	1
12	right	8265000	8385000	1.85213e-11	1.53348e-11	RP11-266K4.1;FAM90A1;ALG1L10P;AC092111.1;FAM86FP;RP11-266K4.9	HK1_TE:35647	6	1
12	left	9665000	9805000	0.000370267	0.000348895	RP11-525E9.1	HK1_TE:35669;HK1_TE:35670	1	2
12	right	9665000	9805000	0.000370267	0.000348895	GOT2P3;RP11-705C15.5;RP11-705C15.4;RP11-705C15.3;CLEC2D	HK1_TE:35666;HK1_TE:35667;HK1_TE:35668	5	3
12	left	9805000	10015000	0.000121884	0.000119115	GOT2P3;RP11-705C15.5;RP11-705C15.4;RP11-705C15.3;CLEC2D	HK1_TE:35677;HK1_TE:35678;HK1_TE:35679;HK1_TE:35680;HK1_TE:35681	5	5
12	right	9805000	10015000	0.000121884	0.000119115	CLEC2B;RP11-290C10.1	HK1_TE:35669;HK1_TE:35670	2	2
12	left	9800000	9947500	0.00608815	0.00657688	RP11-705C15.2;GOT2P3;RP11-705C15.5;RP11-705C15.4;RP11-705C15.3	HK1_TE:35676	5	1
12	left	9905000	10165000	5.76224e-05	5.58451e-05	CD69	HK1_TE:35684	1	1
12	right	9945000	10015000	1.63117e-06	1.84254e-06	CLEC2B;RP11-290C10.1	HK1_TE:35676	2	1
12	right	10015000	12875000	3.66918e-06	6.90274e-06	CDKN1B;RP11-180M15.4;APOLD1	HK1_TE:35677;HK1_TE:35678;HK1_TE:35679;HK1_TE:35680;HK1_TE:35681	3	5
12	left	10025000	10875000	1.19346e-05	1.35168e-05	CLEC2B;RP11-290C10.1;KLRF2	HK1_TE:35719;HK1_TE:35720	3	2
12	right	10025000	10875000	1.19346e-05	1.35168e-05	YBX3	HK1_TE:35677;HK1_TE:35678;HK1_TE:35679;HK1_TE:35680;HK1_TE:35681	1	5
12	right	10480000	10715000	0.000129497	0.000137358	SLC25A39P2;RP11-291B21.2	HK1_TE:35695;HK1_TE:35696	2	2
12	left	10517500	10872500	9.87889e-06	9.15597e-06	RP11-277P12.9;RP11-277P12.20	HK1_TE:35719;HK1_TE:35720	2	2
12	right	10517500	10872500	9.87889e-06	9.15597e-06	YBX3	HK1_TE:35697;HK1_TE:35698;HK1_TE:35699;HK1_TE:35700;HK1_TE:35701;HK1_TE:35702;HK1_TE:35703	1	7
12	right	10875000	12875000	0.000334829	6.13084e-07	CDKN1B;RP11-180M15.4;APOLD1	HK1_TE:35719;HK1_TE:35720	3	2
12	left	11562500	11637500	0.00283092	0.000214472	PRB1	HK1_TE:35725	1	1
12	right	12715000	12875000	0.000603674	1.05214e-06	CDKN1B;RP11-180M15.4;APOLD1	HK1_TE:35769	3	1
12	left	12875000	13045833	2.66526e-09	2.87413e-09	CDKN1B;RP11-180M15.4;APOLD1	HK1_TE:35805;HK1_TE:35806;HK1_TE:35807;HK1_TE:35808;HK1_TE:35809;HK1_TE:35810;HK1_TE:35811;HK1_TE:35812;HK1_TE:35813;HK1_TE:35814;HK1_TE:35815	3	11
12	left	12877500	12971250	3.62771e-05	1.23952e-07	CDKN1B;RP11-180M15.4;APOLD1	HK1_TE:35781;HK1_TE:35782;HK1_TE:35783;HK1_TE:35784;HK1_TE:35785;HK1_TE:35786;HK1_TE:35787;HK1_TE:35788;HK1_TE:35789;HK1_TE:35790;HK1_TE:35791;HK1_TE:35792;HK1_TE:35793	3	13
12	right	12945000	13135000	2.69456e-08	2.43983e-08	SNORD88	HK1_TE:35777;HK1_TE:35778;HK1_TE:35779;HK1_TE:35780;HK1_TE:35781;HK1_TE:35782;HK1_TE:35783	1	7
12	right	12957500	13252500	1.40892e-06	3.14579e-05	GSG1	HK1_TE:35778;HK1_TE:35779;HK1_TE:35780;HK1_TE:35781;HK1_TE:35782;HK1_TE:35783;HK1_TE:35784;HK1_TE:35785;HK1_TE:35786;HK1_TE:35787;HK1_TE:35788;HK1_TE:35789	1	12
12	left	12978706	13044913	0	0	DDX47	HK1_TE:35805;HK1_TE:35806;HK1_TE:35807;HK1_TE:35808;HK1_TE:35809;HK1_TE:35810;HK1_TE:35811;HK1_TE:35812;HK1_TE:35813;HK1_TE:35814;HK1_TE:35815	1	11
12	right	12978706	13044913	0	0	GPRC5A	HK1_TE:35785;HK1_TE:35786;HK1_TE:35787;HK1_TE:35788;HK1_TE:35789;HK1_TE:35790;HK1_TE:35791;HK1_TE:35792;HK1_TE:35793	1	9
12	right	13055000	13360000	0.000131781	0.000119277	EMP1	HK1_TE:35809;HK1_TE:35810;HK1_TE:35811;HK1_TE:35812;HK1_TE:35813;HK1_TE:35814;HK1_TE:35815;HK1_TE:35816	1	8
12	left	13075000	13130000	0.000182324	8.5187e-08	MIR614;RP11-392P7.6	HK1_TE:35819	2	1
12	right	13075000	13130000	0.000182324	8.5187e-08	RP11-392P7.7;SNORD88	HK1_TE:35816;HK1_TE:35817;HK1_TE:35818	2	3
12	left	13080000	13131250	0.00190502	0.00191662	MIR614;RP11-392P7.6	HK1_TE:35819	2	1
12	right	13080000	13131250	0.00190502	0.00191662	SNORD88	HK1_TE:35817;HK1_TE:35818	1	2
12	right	13287500	13347500	2.26819e-11	4.70336e-08	EMP1	HK1_TE:35821;HK1_TE:35822;HK1_TE:35823;HK1_TE:35824	1	4
12	left	14412500	14547500	7.81402e-11	8.28815e-11	RNU6-491P;GNAI2P1	HK1_TE:35840;HK1_TE:35841;HK1_TE:35842;HK1_TE:35843;HK1_TE:35844;HK1_TE:35845;HK1_TE:35846;HK1_TE:35847	2	8
12	left	14412500	14472500	0.000228491	0.000230896	RNU6-491P;GNAI2P1	HK1_TE:35836;HK1_TE:35837	2	2
12	right	14517500	14922500	1.48317e-06	1.51788e-05	RP11-174G6.5;HIST4H4;H2AFJ	HK1_TE:35838;HK1_TE:35839	3	2
12	right	14665000	14925000	0.000806787	0.00076351	RP11-174G6.5;HIST4H4;H2AFJ	HK1_TE:35848	3	1
12	right	14667500	14817500	0.000935164	6.83078e-05	RP11-174G6.1	HK1_TE:35848	1	1
12	right	14820000	14922500	0.00608815	0.000572385	RP11-174G6.5;HIST4H4;H2AFJ	HK1_TE:35849	3	1
12	left	15105000	15955000	0.000741866	0.00732559	ERP27;ARHGDIB	HK1_TE:35878;HK1_TE:35879;HK1_TE:35880;HK1_TE:35881;HK1_TE:35882;HK1_TE:35883;HK1_TE:35884	2	7
12	right	15105000	15955000	0.000741866	0.00732559	RP11-6B19.3	HK1_TE:35852;HK1_TE:35853;HK1_TE:35854	1	3
12	right	15749166	15942500	2.86262e-05	0.000973973	RP11-6B19.1;RP11-6B19.3	HK1_TE:35861;HK1_TE:35862;HK1_TE:35863;HK1_TE:35864	2	4
12	left	15815000	15935000	2.11936e-06	0.00184631	RNU6-251P	HK1_TE:35875;HK1_TE:35876;HK1_TE:35877;HK1_TE:35878	1	4
12	right	15815000	15935000	2.11936e-06	0.00184631	RP11-6B19.1	HK1_TE:35868;HK1_TE:35869	1	2
12	left	15945000	16111666	0.00380513	0.0550083	RP11-6B19.1;RP11-6B19.3	HK1_TE:35886;HK1_TE:35887;HK1_TE:35888	2	3
12	right	15945000	16111666	0.00380513	0.0550083	RP11-674J14.3	HK1_TE:35875;HK1_TE:35876;HK1_TE:35877;HK1_TE:35878;HK1_TE:35879;HK1_TE:35880;HK1_TE:35881;HK1_TE:35882;HK1_TE:35883;HK1_TE:35884	1	10
12	left	15967500	16002500	0.00190502	0.00191662	RP11-6B19.3;RP11-6B19.2	HK1_TE:35885	2	1
12	left	16062500	16132500	7.68564e-05	6.60691e-07	DERA	HK1_TE:35889	1	1
12	left	18415000	18845000	4.18424e-09	2.20337e-06	PIK3C2G	HK1_TE:35906;HK1_TE:35907;HK1_TE:35908;HK1_TE:35909	1	4
12	right	18415000	18845000	4.18424e-09	2.20337e-06	PSMC1P9	HK1_TE:35898;HK1_TE:35899;HK1_TE:35900;HK1_TE:35901;HK1_TE:35902	1	5
12	left	18408750	18468125	5.58158e-10	6.17756e-10	PIK3C2G	HK1_TE:35905	1	1
12	right	18408750	18468125	5.58158e-10	6.17756e-10	RERGL	HK1_TE:35898;HK1_TE:35899;HK1_TE:35900;HK1_TE:35901	1	4
12	left	18587500	19337500	2.70427e-06	0.00330675	RP11-459D22.1	HK1_TE:35927;HK1_TE:35928	1	2
12	left	18842500	19280000	3.36462e-07	9.15597e-06	PSMC1P9	HK1_TE:35923;HK1_TE:35924;HK1_TE:35925;HK1_TE:35926	1	4
12	right	18842500	19280000	3.36462e-07	9.15597e-06	PLEKHA5	HK1_TE:35906;HK1_TE:35907;HK1_TE:35908;HK1_TE:35909	1	4
12	right	19155000	19275000	2.11936e-06	2.28628e-06	RP11-282K24.2;PLEKHA5	HK1_TE:35915;HK1_TE:35916	2	2
12	right	21227500	21272500	0.000589747	0.000571758	SLCO1B1	HK1_TE:35949;HK1_TE:35950;HK1_TE:35951	1	3
12	right	22430000	22565000	3.38388e-08	1.15125e-05	RP11-73M14.1	HK1_TE:35958;HK1_TE:35959;HK1_TE:35960;HK1_TE:35961;HK1_TE:35962	1	5
12	left	25112500	25537500	5.65296e-05	2.03967e-08	BCAT1;RP11-662I13.2;RP11-662I13.1	HK1_TE:35997	3	1
12	right	26255000	26775000	2.04536e-08	0.000266445	RP11-666F17.1	HK1_TE:36003	1	1
12	left	26260000	26850000	7.53704e-05	0.000903509	SSPN	HK1_TE:36024;HK1_TE:36025	1	2
12	right	26860000	26995000	1.50601e-05	1.24958e-08	ITPR2	HK1_TE:36025	1	1
12	left	27170000	27485000	2.50392e-05	1.22037e-07	TM7SF3;MED21	HK1_TE:36033;HK1_TE:36034;HK1_TE:36035;HK1_TE:36036;HK1_TE:36037;HK1_TE:36038	2	6
12	right	27192500	27277500	0.00107522	0.00103268	RP11-582E3.4	HK1_TE:36031	1	1
12	left	27395000	27535000	7.24025e-07	6.42337e-07	STK38L	HK1_TE:36040	1	1
12	right	27490000	27745000	0.000624381	7.97981e-06	RP11-709A23.2	HK1_TE:36034;HK1_TE:36035;HK1_TE:36036;HK1_TE:36037;HK1_TE:36038;HK1_TE:36039	1	6
12	left	27485000	27537500	4.37449e-06	4.71409e-06	ARNTL2	HK1_TE:36040	1	1
12	left	27745000	28125000	6.6553e-06	0.000327748	RP11-709A23.2	HK1_TE:36050;HK1_TE:36051;HK1_TE:36052;HK1_TE:36053;HK1_TE:36054;HK1_TE:36055;HK1_TE:36056;HK1_TE:36057	1	8
12	left	28117500	28335000	7.40721e-08	3.54698e-10	PTHLH;RP11-993B23.3	HK1_TE:36066;HK1_TE:36067;HK1_TE:36069	2	3
12	right	28117500	28335000	7.40721e-08	3.54698e-10	RP11-967K21.1	HK1_TE:36050;HK1_TE:36051;HK1_TE:36052	1	3
12	right	28117500	28285000	9.20386e-13	8.91333e-13	CCDC91	HK1_TE:36050;HK1_TE:36051;HK1_TE:36052	1	3
12	left	28287500	28332500	0.0568906	0.057343	CCDC91	HK1_TE:36066;HK1_TE:36067;HK1_TE:36069	1	3
12	right	30562500	31362500	3.99428e-07	6.08172e-07	RP11-551L14.1	HK1_TE:36083;HK1_TE:36084;HK1_TE:36085;HK1_TE:36086;HK1_TE:36087	1	5
12	right	30570000	30947500	2.24239e-14	5.38479e-12	LINC00941	HK1_TE:36083;HK1_TE:36084;HK1_TE:36085;HK1_TE:36086;HK1_TE:36087	1	5
12	right	30995000	31397500	0.023166	0.0234562	RP11-627K11.5;RP11-627K11.1;RP11-627K11.4	HK1_TE:36090	3	1
12	right	31477500	31742500	0.000258212	0.00251694	DENND5B;DENND5B-AS1;RNU5F-4P;RPL31P50	HK1_TE:36106;HK1_TE:36107	4	2
12	right	31477500	31902500	0.00164913	0.00157116	RP11-467L13.4;RP11-467L13.5	HK1_TE:36106;HK1_TE:36107	2	2
12	left	31805000	32215000	0.00481181	2.15233e-07	METTL20	HK1_TE:36121;HK1_TE:36122	1	2
12	left	31895833	33054166	4.2973e-05	0.00279465	AMN1;RP11-467L13.4;RP11-467L13.5	HK1_TE:36152;HK1_TE:36153;HK1_TE:36154;HK1_TE:36155;HK1_TE:36156;HK1_TE:36157;HK1_TE:36158	3	7
12	right	32595000	33045000	7.02045e-07	3.05995e-05	PKP2	HK1_TE:36133;HK1_TE:36134;HK1_TE:36135;HK1_TE:36136;HK1_TE:36137;HK1_TE:36138;HK1_TE:36139;HK1_TE:36140;HK1_TE:36141;HK1_TE:36142	1	10
12	right	32607500	32892500	3.33902e-05	1.22215e-06	RP11-278C7.1	HK1_TE:36136;HK1_TE:36137;HK1_TE:36138;HK1_TE:36139;HK1_TE:36140;HK1_TE:36141;HK1_TE:36142	1	7
12	right	32832500	32907500	0.00111026	2.20414e-05	YARS2	HK1_TE:36147	1	1
12	left	32907500	33742500	4.60857e-12	2.29083e-14	YARS2	HK1_TE:36170;HK1_TE:36171;HK1_TE:36172;HK1_TE:36173	1	4
12	right	38535000	38710000	4.78813e-08	1.17399e-09	ALG10B;AC117372.1	HK1_TE:36179;HK1_TE:36180;HK1_TE:36181;HK1_TE:36182;HK1_TE:36183;HK1_TE:36184	2	6
12	right	42530000	42725000	1.38499e-32	1.17342e-26	ZCRB1	HK1_TE:36207	1	1
12	right	42635000	42720000	0.000147027	0.00493581	ZCRB1	HK1_TE:36208	1	1
12	right	46122500	46382500	3.58784e-09	3.92114e-11	SCAF11	HK1_TE:36243	1	1
12	left	46385000	46665000	0.000215671	0.00298996	SCAF11;RP11-101K23.1	HK1_TE:36252;HK1_TE:36253	2	2
12	left	47075000	47185000	0.000996747	9.32258e-06	RP11-66E20.2	HK1_TE:36286;HK1_TE:36287;HK1_TE:36288	1	3
12	right	47425000	47800000	0.0514868	0.00026845	RP1-90J4.1	HK1_TE:36306;HK1_TE:36307;HK1_TE:36308;HK1_TE:36309;HK1_TE:36310;HK1_TE:36311;HK1_TE:36312	1	7
12	left	47475000	47705000	5.76224e-05	5.58451e-05	AMIGO2;PCED1B	HK1_TE:36341;HK1_TE:36342;HK1_TE:36343;HK1_TE:36344;HK1_TE:36345;HK1_TE:36346	2	6
12	right	47483928	47668214	3.14675e-10	3.01651e-10	RP11-493L12.3	HK1_TE:36313;HK1_TE:36314;HK1_TE:36315;HK1_TE:36316;HK1_TE:36317;HK1_TE:36318;HK1_TE:36319;HK1_TE:36320	1	8
12	left	48100000	48162500	0.0025542	0.000236297	RPAP3;RP1-197B17.3	HK1_TE:36360;HK1_TE:36361;HK1_TE:36362;HK1_TE:36363;HK1_TE:36364;HK1_TE:36365;HK1_TE:36366;HK1_TE:36367;HK1_TE:36368	2	9
12	right	49315000	49385000	1.20576e-05	1.15125e-05	WNT1;DDN;RP11-386G11.3;RP11-386G11.5	HK1_TE:36388	4	1
12	right	49452500	49527500	0.00608815	0.000572385	RP11-386G11.10;TUBA1B;Y_RNA	HK1_TE:36389;HK1_TE:36390	3	2
12	right	50262500	50362500	7.68997e-05	7.60391e-05	RP11-469H8.6;RP11-469H8.8;AQP5;AQP6	HK1_TE:36404	4	1
12	right	50262500	50450000	4.42234e-08	4.82846e-08	ASIC1	HK1_TE:36404	1	1
12	left	50487500	50712500	5.11506e-06	4.93242e-06	SMARCD1;GPD1	HK1_TE:36431	2	1
12	left	50745000	50795000	0.000129497	0.000137358	RP11-112N23.1	HK1_TE:36432;HK1_TE:36433;HK1_TE:36434	1	3
12	right	50925000	51035000	1.5711e-07	1.62791e-07	RNU6-769P	HK1_TE:36435;HK1_TE:36436;HK1_TE:36437;HK1_TE:36438;HK1_TE:36439;HK1_TE:36440	1	6
12	right	51157500	51417500	0.000258212	1.89137e-05	SLC11A2;U6;RNU6-1273P	HK1_TE:36452	3	1
12	right	51212500	51400000	1.4115e-06	1.34685e-06	U6	HK1_TE:36458	1	1
12	left	51475000	51525000	2.66943e-05	0.00300023	CSRNP2	HK1_TE:36459;HK1_TE:36460	1	2
12	left	52287500	52372500	2.06874e-05	1.89137e-05	ANKRD33;RP11-1100L3.4;ACVRL1	HK1_TE:36479;HK1_TE:36480	3	2
12	right	52420833	52469166	2.67372e-12	2.6175e-12	C12orf44;RP11-1100L3.7;OR7E47P;RP1-288H2.4	HK1_TE:36481;HK1_TE:36482;HK1_TE:36483;HK1_TE:36484	4	4
12	right	52544500	53266500	7.47717e-15	2.63545e-11	RPL7P41	HK1_TE:36487;HK1_TE:36488;HK1_TE:36489	1	3
12	right	52545000	52917500	6.80226e-13	4.66956e-13	KRT5;AC055736.1	HK1_TE:36487;HK1_TE:36488;HK1_TE:36489	2	3
12	right	52550833	52724166	1.71532e-08	2.41418e-10	KRT83	HK1_TE:36487;HK1_TE:36488;HK1_TE:36489;HK1_TE:36490	1	4
12	right	52552500	52608214	8.49396e-10	1.59658e-12	C12orf80;LINC00592	HK1_TE:36487;HK1_TE:36488;HK1_TE:36489;HK1_TE:36490	2	4
12	left	52612500	53267500	0.000264585	0.00055448	C12orf80;LINC00592;METTL7AP1;KRT7	HK1_TE:36524;HK1_TE:36525;HK1_TE:36526;HK1_TE:36527;HK1_TE:36528;HK1_TE:36529;HK1_TE:36530;HK1_TE:36531;HK1_TE:36532;HK1_TE:36533;HK1_TE:36534;HK1_TE:36535	4	12
12	right	52612500	53267500	0.000264585	0.00055448	RPL7P41	HK1_TE:36497;HK1_TE:36498;HK1_TE:36499;HK1_TE:36500;HK1_TE:36501;HK1_TE:36502	1	6
12	left	52772500	53272500	0.00196638	0.000118409	KRT85;KRT84;RP3-416H24.4	HK1_TE:36525;HK1_TE:36526;HK1_TE:36527;HK1_TE:36528;HK1_TE:36529;HK1_TE:36530;HK1_TE:36531;HK1_TE:36532;HK1_TE:36533;HK1_TE:36534;HK1_TE:36535	3	11
12	right	52915000	53065000	0.00179393	0.00170781	KRT1	HK1_TE:36517	1	1
12	right	53614500	53663500	0.0120744	0.01214	ESPL1	HK1_TE:36547;HK1_TE:36548;HK1_TE:36549	1	3
12	left	54162500	54377500	0.024362	0.000214472	RP11-686F15.2	HK1_TE:36573;HK1_TE:36574	1	2
12	right	54162500	54377500	0.024362	0.000214472	HOTAIR;HOXC11;HOXC-AS3;HOXC10;RP11-834C11.12;HOXC6;MIR196A2;HOXC-AS2;HOXC9	HK1_TE:36559;HK1_TE:36560;HK1_TE:36561;HK1_TE:36562	9	4
12	right	56130000	56212500	0.0462165	0.0083976	SARNP;RP11-762I7.5;ORMDL2;DNAJC14;TMEM198B	HK1_TE:36592	5	1
12	left	56130000	56325000	1.04148e-05	9.32258e-06	CD63;RP11-644F5.11;RP11-644F5.12;GDF11	HK1_TE:36593;HK1_TE:36594	4	2
12	right	56130000	56325000	1.04148e-05	9.32258e-06	WIBG;DGKA	HK1_TE:36592	2	1
12	left	56365000	56495000	1.20576e-05	2.82963e-08	PMEL;CDK2;RP11-973D8.4;RAB5B;RP11-603J24.7	HK1_TE:36601;HK1_TE:36602	5	2
12	right	56365000	56495000	1.20576e-05	2.82963e-08	RP11-603J24.9;PA2G4;RP11-603J24.17	HK1_TE:36595;HK1_TE:36596;HK1_TE:36597	3	3
12	left	56437500	56472500	0.00172072	0.00183873	RP11-603J24.4;RPS26	HK1_TE:36600	2	1
12	left	56445000	56505000	4.11602e-07	3.80757e-07	RP11-603J24.4;RPS26	HK1_TE:36601;HK1_TE:36602	2	2
12	right	56445000	56505000	4.11602e-07	3.80757e-07	RP11-603J24.9;PA2G4;RP11-603J24.17;RPL41;ZC3H10;ESYT1;RP11-603J24.6	HK1_TE:36599	7	1
12	right	56514166	56550833	1.92673e-18	1.78891e-14	RP11-603J24.14;MYL6B;MYL6	HK1_TE:36601;HK1_TE:36602	3	2
12	left	56752500	56842500	1.46905e-06	7.43645e-05	STAT2;RNU7-40P;APOF	HK1_TE:36605	3	1
12	left	56752500	57022500	0.000394877	0.000365355	STAT2;RNU7-40P;APOF	HK1_TE:36610;HK1_TE:36611;HK1_TE:36612	3	3
12	left	56912500	56974500	4.95717e-09	4.98874e-07	RP11-153M3.1;RBMS2	HK1_TE:36609	2	1
12	right	56912500	56974500	4.95717e-09	4.98874e-07	RNU6-343P	HK1_TE:36606;HK1_TE:36607;HK1_TE:36608	1	3
12	left	56920833	57027500	2.10182e-05	0.0036095	RBMS2	HK1_TE:36610;HK1_TE:36611;HK1_TE:36612	1	3
12	right	56920833	57027500	2.10182e-05	0.0036095	BAZ2A;ATP5B;SNORD59A	HK1_TE:36606;HK1_TE:36607;HK1_TE:36608	3	3
12	left	57035000	57117500	9.87889e-06	9.15597e-06	BAZ2A;ATP5B;SNORD59A	HK1_TE:36614	3	1
12	right	57035000	57117500	9.87889e-06	9.15597e-06	NACA	HK1_TE:36610;HK1_TE:36611;HK1_TE:36612	1	3
12	left	57152500	57387500	1.32821e-12	1.12094e-10	PRIM1;HSD17B6	HK1_TE:36626	2	1
12	left	57235000	57295000	6.6368e-05	7.04169e-05	RP11-74M13.3	HK1_TE:36619;HK1_TE:36620;HK1_TE:36621;HK1_TE:36622	1	4
12	left	57340000	57382500	0.00354321	0.0036095	SDR9C7;RDH16	HK1_TE:36626	2	1
12	right	57340000	57382500	0.00354321	0.0036095	GPR182;RP11-474N8.5;HBCBP	HK1_TE:36623	3	1
12	left	57405000	57635000	0.00179393	8.73196e-07	RP11-474N8.5;HBCBP;ZBTB39	HK1_TE:36638	3	1
12	left	57402500	57507500	0.000840034	7.73116e-05	GPR182;RP11-474N8.5;HBCBP;ZBTB39	HK1_TE:36632	4	1
12	left	57469166	57567500	9.87889e-06	0.000214472	TMEM194A;NAB2	HK1_TE:36633;HK1_TE:36634;HK1_TE:36635;HK1_TE:36636;HK1_TE:36637	2	5
12	left	57516875	57571875	4.99832e-08	2.60856e-06	STAT6;AC023237.1;LRP1	HK1_TE:36633;HK1_TE:36634;HK1_TE:36635;HK1_TE:36636;HK1_TE:36637	3	5
12	left	57855000	58025000	0.000143315	0.000134276	INHBE;GLI1;MARS	HK1_TE:36644	3	1
12	left	58147500	58242500	0.000935164	6.83078e-05	AGAP2;CDK4;MARCH9	HK1_TE:36645	3	1
12	left	59312500	59477500	9.87889e-06	9.15597e-06	LRIG3;RP11-150C16.1	HK1_TE:36672;HK1_TE:36673;HK1_TE:36674;HK1_TE:36675;HK1_TE:36676	2	5
12	left	62997500	63122500	4.99832e-08	2.60856e-06	C12orf61;RP11-631N16.2;MIRLET7I	HK1_TE:36702;HK1_TE:36703;HK1_TE:36704;HK1_TE:36705;HK1_TE:36706	3	5
12	left	64237500	64312500	0.000543794	2.58117e-05	AC084357.1;SRGAP1	HK1_TE:36724;HK1_TE:36725	2	2
12	right	64375000	64485000	5.884e-05	5.26111e-05	RP11-196H14.2	HK1_TE:36726;HK1_TE:36727;HK1_TE:36728;HK1_TE:36729;HK1_TE:36730	1	5
12	right	64375000	64585000	3.22683e-06	0.00366416	RNU6-1009P	HK1_TE:36726;HK1_TE:36727;HK1_TE:36728;HK1_TE:36729;HK1_TE:36730	1	5
12	left	64797500	64847500	0.00190502	0.00191662	C12orf56;XPOT	HK1_TE:36742;HK1_TE:36743	2	2
12	right	64945833	65090833	7.5347e-06	7.73116e-05	AC025262.1	HK1_TE:36744	1	1
12	right	65712500	65962500	2.00628e-06	1.39583e-11	RP11-221N13.2	HK1_TE:36761;HK1_TE:36762	1	2
12	right	65712500	66225000	7.35948e-18	7.48339e-18	RPSAP52;HMGA2	HK1_TE:36761;HK1_TE:36762	2	2
12	left	65955000	66215000	1.68397e-06	4.0787e-09	RP11-221N13.2	HK1_TE:36797;HK1_TE:36798;HK1_TE:36799;HK1_TE:36800;HK1_TE:36801;HK1_TE:36802;HK1_TE:36803;HK1_TE:36804;HK1_TE:36805	1	9
12	right	65955000	66215000	1.68397e-06	4.0787e-09	RPSAP52;HMGA2	HK1_TE:36769;HK1_TE:36770;HK1_TE:36771;HK1_TE:36772;HK1_TE:36773;HK1_TE:36774;HK1_TE:36775;HK1_TE:36776	2	8
12	left	66027500	66122500	7.40721e-08	9.50985e-06	RP11-230G5.2;RP11-221N13.4;PCNPP3	HK1_TE:36777;HK1_TE:36778;HK1_TE:36779;HK1_TE:36780;HK1_TE:36781;HK1_TE:36782;HK1_TE:36783;HK1_TE:36784;HK1_TE:36785;HK1_TE:36786;HK1_TE:36787	3	11
12	left	66042500	66215000	9.42872e-08	1.34484e-06	RP11-230G5.2;RP11-221N13.4;PCNPP3	HK1_TE:36797;HK1_TE:36798;HK1_TE:36799;HK1_TE:36800;HK1_TE:36801;HK1_TE:36802;HK1_TE:36803;HK1_TE:36804;HK1_TE:36805	3	9
12	right	66155000	66215000	7.85431e-06	8.29984e-06	RPSAP52;HMGA2	HK1_TE:36788;HK1_TE:36789;HK1_TE:36790;HK1_TE:36791;HK1_TE:36792;HK1_TE:36796	2	6
12	left	75737500	76437500	4.92042e-06	7.20829e-06	GLIPR1L1	HK1_TE:36973;HK1_TE:36974	1	2
12	left	75785000	75845000	5.38407e-05	5.78509e-05	CAPS2;GLIPR1L2	HK1_TE:36913;HK1_TE:36914;HK1_TE:36915;HK1_TE:36916;HK1_TE:36917;HK1_TE:36918;HK1_TE:36919;HK1_TE:36920;HK1_TE:36921;HK1_TE:36922	2	10
12	left	75782500	75882500	0.000212862	9.15597e-06	CAPS2;GLIPR1L2	HK1_TE:36923;HK1_TE:36924	2	2
12	left	76115000	76255000	0.00025466	0.000249467	AC131012.1	HK1_TE:36929;HK1_TE:36930;HK1_TE:36931;HK1_TE:36932;HK1_TE:36933;HK1_TE:36934;HK1_TE:36935	1	7
12	left	76110833	76415833	7.53704e-05	6.83078e-05	AC131012.1	HK1_TE:36966;HK1_TE:36967;HK1_TE:36968;HK1_TE:36969;HK1_TE:36970;HK1_TE:36971;HK1_TE:36972;HK1_TE:36973	1	8
12	right	76261666	76328333	2.86952e-05	2.989e-08	RP11-290L1.6	HK1_TE:36929;HK1_TE:36930;HK1_TE:36931;HK1_TE:36932;HK1_TE:36933;HK1_TE:36934;HK1_TE:36935;HK1_TE:36936	1	8
12	left	76341666	76410000	7.27511e-07	6.87811e-07	RN7SL734P	HK1_TE:36965;HK1_TE:36966;HK1_TE:36967;HK1_TE:36968;HK1_TE:36969;HK1_TE:36970;HK1_TE:36971;HK1_TE:36972	1	8
12	right	76341666	76410000	7.27511e-07	6.87811e-07	RP11-290L1.3	HK1_TE:36941;HK1_TE:36942;HK1_TE:36943;HK1_TE:36944;HK1_TE:36945;HK1_TE:36946;HK1_TE:36947;HK1_TE:36948;HK1_TE:36949;HK1_TE:36950;HK1_TE:36951;HK1_TE:36952;HK1_TE:36953	1	13
12	right	77450000	77712500	0.00217901	0.00235152	RP1-34H18.1	HK1_TE:37003;HK1_TE:37004	1	2
12	left	77457500	77510500	4.83348e-19	4.382e-19	E2F7	HK1_TE:37005;HK1_TE:37006;HK1_TE:37007;HK1_TE:37008;HK1_TE:37009;HK1_TE:37010;HK1_TE:37011;HK1_TE:37012	1	8
12	right	80867500	80992500	3.24311e-06	3.20349e-05	RP11-272K23.3	HK1_TE:37080	1	1
12	right	83042500	83082500	0.000366955	1.26465e-05	TMTC2	HK1_TE:37083;HK1_TE:37084;HK1_TE:37085	1	3
12	left	83082500	83132500	1.99973e-07	1.85699e-07	TMTC2	HK1_TE:37086	1	1
12	right	85863750	86263750	1.32821e-12	1.12094e-10	NTS	HK1_TE:37094;HK1_TE:37095;HK1_TE:37096;HK1_TE:37097;HK1_TE:37098;HK1_TE:37099;HK1_TE:37100	1	7
12	right	85970833	86264166	5.20391e-08	4.48526e-08	NTS	HK1_TE:37101	1	1
12	right	87835000	88225000	3.39396e-05	0.000742353	RP11-248E9.6;RP11-248E9.7	HK1_TE:37120;HK1_TE:37121;HK1_TE:37122;HK1_TE:37123;HK1_TE:37124;HK1_TE:37125	2	6
12	right	88537500	89912500	0.000330097	0.000438983	POC1B;GALNT4;POC1B-GALNT4;RP11-734K2.4	HK1_TE:37130;HK1_TE:37131	4	2
12	left	88537500	88637500	0.00283092	0.00302692	CEP290;TMTC3	HK1_TE:37132;HK1_TE:37133;HK1_TE:37134	2	3
12	left	88545000	89385000	5.13023e-09	6.42337e-07	CEP290;TMTC3	HK1_TE:37170	2	1
12	right	89512500	89747500	7.55773e-05	0.00133372	DUSP6;RP11-1109F11.3	HK1_TE:37172	2	1
12	right	89747500	89920000	2.35211e-07	2.03834e-07	POC1B;GALNT4;POC1B-GALNT4;RP11-734K2.4	HK1_TE:37178;HK1_TE:37179	4	2
12	left	89765000	90155000	0.000108308	0.000118409	RP11-1109F11.3;RP11-1109F11.5	HK1_TE:37196;HK1_TE:37197;HK1_TE:37198;HK1_TE:37199;HK1_TE:37200;HK1_TE:37201;HK1_TE:37202;HK1_TE:37203	2	8
12	right	89765000	90155000	0.000108308	0.000118409	MRPL2P1;RNU6-148P	HK1_TE:37179;HK1_TE:37180;HK1_TE:37181	2	3
12	right	90032500	90100000	0.0120744	0.01214	ATP2B1;LINC00936	HK1_TE:37188;HK1_TE:37189	2	2
12	right	93345833	106110833	4.5358e-13	1.10808e-12	RP11-266E14.1	HK1_TE:37246;HK1_TE:37247;HK1_TE:37248;HK1_TE:37249;HK1_TE:37250;HK1_TE:37251	1	6
12	left	93405000	93485000	2.11936e-06	2.28628e-06	RP11-511B23.1;Y_RNA	HK1_TE:37264;HK1_TE:37265;HK1_TE:37266;HK1_TE:37267;HK1_TE:37268	2	5
12	right	93405000	93485000	2.11936e-06	2.28628e-06	AC138123.2;RP11-202G11.2;AC138123.1	HK1_TE:37256;HK1_TE:37257;HK1_TE:37258;HK1_TE:37259;HK1_TE:37260;HK1_TE:37261	3	6
12	right	93485000	93772500	0.00125972	0.00133372	RP11-486A14.2;NUDT4	HK1_TE:37264;HK1_TE:37265;HK1_TE:37266;HK1_TE:37267;HK1_TE:37268	2	5
12	left	93482500	93527500	0.0181545	0.000571758	AC138123.2;RP11-202G11.2;AC138123.1	HK1_TE:37269;HK1_TE:37270;HK1_TE:37271;HK1_TE:37272;HK1_TE:37273;HK1_TE:37274;HK1_TE:37275	3	7
12	right	93482500	93527500	0.0181545	0.000571758	RP11-202G11.1	HK1_TE:37264;HK1_TE:37265;HK1_TE:37266;HK1_TE:37267;HK1_TE:37268	1	5
12	left	93517500	93622500	0.000328442	0.0036095	RP11-202G11.1	HK1_TE:37277;HK1_TE:37278;HK1_TE:37279;HK1_TE:37280	1	4
12	right	93517500	93622500	0.000328442	0.0036095	RP11-511B23.2	HK1_TE:37269;HK1_TE:37270;HK1_TE:37271;HK1_TE:37272	1	4
12	right	93625000	93775000	2.50392e-05	2.2491e-05	RP11-486A14.2;NUDT4	HK1_TE:37277;HK1_TE:37278;HK1_TE:37279;HK1_TE:37280	2	4
12	left	93897500	94137500	1.23281e-08	1.1321e-08	RN7SL737P	HK1_TE:37301;HK1_TE:37302;HK1_TE:37303	1	3
12	left	93902500	94496500	1.52468e-24	9.91376e-29	RN7SL737P	HK1_TE:37310;HK1_TE:37311;HK1_TE:37312	1	3
12	left	93908750	93958750	0.0430651	0.0453694	RN7SL737P	HK1_TE:37286;HK1_TE:37287	1	2
12	right	93908750	93958750	0.0430651	0.0453694	SOCS2-AS1;SOCS2	HK1_TE:37285	2	1
12	left	93963500	94179500	2.10534e-07	1.25564e-09	SOCS2-AS1;SOCS2	HK1_TE:37304;HK1_TE:37305;HK1_TE:37306;HK1_TE:37307;HK1_TE:37308	2	5
12	left	94072500	94137500	1.78631e-05	1.71738e-05	CRADD	HK1_TE:37301;HK1_TE:37302;HK1_TE:37303	1	3
12	right	94165000	94235000	0.000180364	0.000193614	RN7SL630P;RP11-887P2.6	HK1_TE:37304;HK1_TE:37305;HK1_TE:37306	2	3
12	left	94947500	95042500	0.000228491	4.71409e-06	SUCLG2P2;MIR5700	HK1_TE:37317;HK1_TE:37318;HK1_TE:37319;HK1_TE:37320;HK1_TE:37321	2	5
12	left	94947500	95157500	0.00652191	0.00660905	SUCLG2P2;MIR5700	HK1_TE:37323;HK1_TE:37324	2	2
12	left	95040000	95157500	0.000543794	0.000569427	TMCC3	HK1_TE:37323;HK1_TE:37324	1	2
12	left	95467500	95512500	0.00367096	0.000107722	NR2C1	HK1_TE:37334;HK1_TE:37335;HK1_TE:37336	1	3
12	left	95487500	96187500	0.00126372	0.001564	RP11-129B9.2	HK1_TE:37361;HK1_TE:37362;HK1_TE:37363;HK1_TE:37364;HK1_TE:37365;HK1_TE:37366;HK1_TE:37367;HK1_TE:37368;HK1_TE:37371	1	9
12	right	95487500	96187500	0.00126372	0.001564	NTN4;RNU6-247P;RP11-536G4.1	HK1_TE:37331;HK1_TE:37332;HK1_TE:37333;HK1_TE:37334	3	4
12	right	95697500	95867500	4.39435e-09	4.42523e-09	RP11-490G8.1;METAP2	HK1_TE:37340	2	1
12	right	95995000	96195000	3.98279e-06	4.31374e-06	NTN4;RNU6-247P;RP11-536G4.1	HK1_TE:37344;HK1_TE:37345	3	2
12	right	96108333	96211666	0.000971158	0.00104497	RP11-536G4.1	HK1_TE:37354;HK1_TE:37355;HK1_TE:37356	1	3
12	right	96202500	96602500	1.76179e-05	1.51788e-05	ELK3	HK1_TE:37361;HK1_TE:37362;HK1_TE:37363;HK1_TE:37364;HK1_TE:37365;HK1_TE:37366;HK1_TE:37367;HK1_TE:37368;HK1_TE:37369;HK1_TE:37370;HK1_TE:37371	1	11
12	right	96450000	96792500	0.000310193	0.000290788	CDK17;RP11-117N2.2	HK1_TE:37376;HK1_TE:37377;HK1_TE:37378;HK1_TE:37379	2	4
12	right	96442500	96592500	7.81402e-11	8.28815e-11	ELK3	HK1_TE:37376;HK1_TE:37377;HK1_TE:37378;HK1_TE:37379	1	4
12	left	96457500	96910000	0.00164913	0.00758585	RP11-256L6.4	HK1_TE:37405;HK1_TE:37406	1	2
12	right	96453750	96606250	1.15341e-15	1.04524e-15	RP11-394J1.2	HK1_TE:37376;HK1_TE:37377;HK1_TE:37378;HK1_TE:37379	1	4
12	left	96602500	96822500	5.96206e-07	1.63551e-11	ELK3	HK1_TE:37386;HK1_TE:37387;HK1_TE:37388;HK1_TE:37389;HK1_TE:37390;HK1_TE:37391	1	6
12	left	96612500	96895000	2.10182e-05	0.000312848	RP11-394J1.2	HK1_TE:37402;HK1_TE:37403;HK1_TE:37404;HK1_TE:37405;HK1_TE:37406	1	5
12	left	96812000	96881000	6.4405e-12	8.09106e-09	RN7SKP11	HK1_TE:37401;HK1_TE:37402;HK1_TE:37403;HK1_TE:37404;HK1_TE:37406	1	5
12	right	96812000	96881000	6.4405e-12	8.09106e-09	RP11-510I5.4;C12orf55	HK1_TE:37386;HK1_TE:37387;HK1_TE:37388;HK1_TE:37389;HK1_TE:37390;HK1_TE:37391	2	6
12	left	97962500	99037500	1.48273e-06	0.000216004	MIR135A2	HK1_TE:37428;HK1_TE:37429;HK1_TE:37430;HK1_TE:37431	1	4
12	right	97962500	99037500	1.48273e-06	0.000216004	IKBIP;APAF1	HK1_TE:37411;HK1_TE:37412;HK1_TE:37413;HK1_TE:37414;HK1_TE:37415;HK1_TE:37416;HK1_TE:37417;HK1_TE:37418;HK1_TE:37419;HK1_TE:37420	2	10
12	left	98815000	99040000	3.22683e-06	3.00362e-06	RNU4-41P	HK1_TE:37428;HK1_TE:37429;HK1_TE:37430;HK1_TE:37431	1	4
12	right	98884166	98924166	0.00283092	0.00302692	TMPO-AS1;TMPO;RN7SL179P	HK1_TE:37426;HK1_TE:37427	3	2
12	left	102222500	102272500	0.000805646	0.000868542	GNPTAB;RNA5SP369	HK1_TE:37452	2	1
12	left	103890000	103942500	4.27631e-06	6.46816e-08	C12orf42;RP11-626I20.1;RP11-626I20.2	HK1_TE:37460;HK1_TE:37461;HK1_TE:37462;HK1_TE:37463	3	4
12	right	104197500	104322500	2.69181e-06	2.60856e-06	RP11-642P15.1;HSP90B1;MIR3652	HK1_TE:37464;HK1_TE:37465;HK1_TE:37466;HK1_TE:37467	3	4
12	left	104355000	104525000	0.0132788	0.0144825	C12orf73;TDG	HK1_TE:37475	2	1
12	left	104360000	104455000	0.000180364	0.000193614	C12orf73;TDG	HK1_TE:37473;HK1_TE:37474	2	2
12	left	104532500	104682500	9.87889e-06	9.15597e-06	NFYB;RNA5SP370	HK1_TE:37488;HK1_TE:37489;HK1_TE:37490;HK1_TE:37491;HK1_TE:37492;HK1_TE:37493;HK1_TE:37494;HK1_TE:37495;HK1_TE:37496;HK1_TE:37497;HK1_TE:37498	2	11
12	left	104675000	104995000	1.08697e-07	4.29068e-06	RP11-818F20.5	HK1_TE:37507;HK1_TE:37508;HK1_TE:37509	1	3
12	right	104675000	104995000	1.08697e-07	4.29068e-06	MIR3922	HK1_TE:37486;HK1_TE:37487;HK1_TE:37488;HK1_TE:37489;HK1_TE:37490;HK1_TE:37491;HK1_TE:37492;HK1_TE:37493;HK1_TE:37494;HK1_TE:37495;HK1_TE:37496;HK1_TE:37497;HK1_TE:37498	1	13
12	right	104799166	104850833	2.13594e-05	2.20414e-05	CHST11	HK1_TE:37501;HK1_TE:37502	1	2
12	left	104850000	105067500	8.2875e-07	3.44204e-05	CHST11	HK1_TE:37510;HK1_TE:37511;HK1_TE:37512;HK1_TE:37513;HK1_TE:37514;HK1_TE:37515;HK1_TE:37516;HK1_TE:37517	1	8
12	left	104850000	104990000	5.23904e-15	7.15673e-12	CHST11	HK1_TE:37506;HK1_TE:37507;HK1_TE:37508;HK1_TE:37509	1	4
12	left	104990000	105067500	0.00190502	0.00191662	MIR3922	HK1_TE:37510;HK1_TE:37511;HK1_TE:37512;HK1_TE:37513;HK1_TE:37514;HK1_TE:37515;HK1_TE:37516;HK1_TE:37517	1	8
12	right	105955000	106635000	0.01104	0.00106783	RP11-651L5.2	HK1_TE:37522	1	1
12	right	105957500	106530000	0.000148601	0.00103268	NUAK1	HK1_TE:37522	1	1
12	left	106100000	106530000	1.11207e-06	9.78406e-07	RP11-266E14.1	HK1_TE:37527	1	1
12	right	106425000	106532500	8.7073e-05	9.07266e-05	NUAK1	HK1_TE:37524	1	1
12	left	106697500	106752500	0.00364439	0.000172498	CKAP4;TCP11L2	HK1_TE:37530	2	1
12	right	107524500	108004500	1.67662e-20	1.56501e-20	RP11-128P10.1	HK1_TE:37536	1	1
12	right	107612500	107680000	0.000571434	0.000572385	SETP7	HK1_TE:37541	1	1
12	left	107712500	107789166	6.26783e-13	6.73527e-13	BTBD11	HK1_TE:37563;HK1_TE:37564;HK1_TE:37565;HK1_TE:37566;HK1_TE:37567;HK1_TE:37568;HK1_TE:37569	1	7
12	right	108080833	108277500	1.487e-06	1.34484e-06	RP11-554D14.4;RP11-554D14.5	HK1_TE:37575	2	1
12	left	108957500	109250000	2.57999e-11	2.0385e-11	SART3;ISCU	HK1_TE:37600;HK1_TE:37601;HK1_TE:37602;HK1_TE:37603;HK1_TE:37604;HK1_TE:37605;HK1_TE:37606;HK1_TE:37607	2	8
12	right	108957500	109250000	2.57999e-11	2.0385e-11	SSH1;DAO	HK1_TE:37578;HK1_TE:37579	2	2
12	right	109025000	109535000	0.000147027	2.0072e-06	ALKBH2;UNG;RP11-968O1.5	HK1_TE:37580;HK1_TE:37581;HK1_TE:37582	3	3
12	left	109057500	109130000	8.37638e-06	7.98104e-06	RNU7-169P	HK1_TE:37587;HK1_TE:37588;HK1_TE:37589	1	3
12	right	109057500	109130000	8.37638e-06	7.98104e-06	CORO1C;Y_RNA	HK1_TE:37583	2	1
12	right	109125000	109535000	9.34629e-08	1.09578e-10	ALKBH2;UNG;RP11-968O1.5	HK1_TE:37584;HK1_TE:37585;HK1_TE:37586;HK1_TE:37587;HK1_TE:37588;HK1_TE:37589	3	6
12	left	109123500	109238500	4.99832e-08	9.07266e-05	CORO1C;Y_RNA	HK1_TE:37600;HK1_TE:37601;HK1_TE:37602;HK1_TE:37603;HK1_TE:37604;HK1_TE:37605;HK1_TE:37606;HK1_TE:37607	2	8
12	right	109123500	109238500	4.99832e-08	9.07266e-05	SSH1;MIR619;DAO	HK1_TE:37584;HK1_TE:37585;HK1_TE:37586;HK1_TE:37587;HK1_TE:37588;HK1_TE:37589	3	6
12	right	109207500	109247500	1.56707e-06	8.8488e-09	SSH1;DAO	HK1_TE:37590;HK1_TE:37591;HK1_TE:37592;HK1_TE:37593;HK1_TE:37594;HK1_TE:37595;HK1_TE:37596;HK1_TE:37597;HK1_TE:37598;HK1_TE:37599	2	10
12	left	109252500	109342500	1.21592e-05	2.31256e-07	SSH1;DAO	HK1_TE:37610	2	1
12	right	110035000	110215000	1.72472e-06	1.81709e-06	FAM222A-AS1	HK1_TE:37617;HK1_TE:37618	1	2
12	left	110285000	110320000	0.00190502	0.00191662	TRPV4;MIR4497;RP1-7G5.5	HK1_TE:37624;HK1_TE:37625;HK1_TE:37626;HK1_TE:37627;HK1_TE:37628;HK1_TE:37629	3	6
12	right	110285000	110320000	0.00190502	0.00191662	GLTP;RP1-7G5.6	HK1_TE:37620;HK1_TE:37621;HK1_TE:37622	2	3
12	right	110665000	110725000	0.000217035	0.000235257	ATP2A2	HK1_TE:37639;HK1_TE:37640;HK1_TE:37641;HK1_TE:37642	1	4
12	left	111145000	111325000	1.04148e-05	9.32258e-06	HVCN1	HK1_TE:37660	1	1
12	right	111332500	111460000	2.61502e-05	7.09813e-07	CUX2	HK1_TE:37660	1	1
12	right	111332500	111749166	6.57103e-18	2.82992e-21	AC002979.1	HK1_TE:37660	1	1
12	left	112277500	112452500	6.88926e-08	6.46816e-08	MAPKAPK5-AS1;AC003029.1;MAPKAPK5	HK1_TE:37686;HK1_TE:37687	3	2
12	right	112277500	112452500	6.88926e-08	6.46816e-08	TMEM116;RP1-128M12.3;ERP29	HK1_TE:37684	3	1
12	right	112387500	112447500	4.72365e-24	4.96727e-24	TMEM116;RP1-128M12.3;ERP29	HK1_TE:37685	3	1
12	left	112476250	112520000	0.000220834	0.00376037	MIR3657	HK1_TE:37688;HK1_TE:37689;HK1_TE:37690	1	3
12	left	113637500	113750000	9.95391e-05	0.0141596	DDX54;C12orf52;RP11-545P7.4	HK1_TE:37726;HK1_TE:37727;HK1_TE:37728	3	3
12	left	116865000	116965000	4.62082e-09	4.92305e-09	MIR4472-2	HK1_TE:37755;HK1_TE:37756;HK1_TE:37757	1	3
12	right	116865000	116965000	4.62082e-09	4.92305e-09	RP11-148B3.1;LINC00173	HK1_TE:37748;HK1_TE:37749;HK1_TE:37750;HK1_TE:37751	2	4
12	right	116892500	116997500	1.14535e-05	1.22662e-05	RP11-809C9.2;MAP1LC3B2	HK1_TE:37752;HK1_TE:37753	2	2
12	left	116962500	117362500	3.25773e-08	2.88818e-05	RP11-148B3.1;LINC00173	HK1_TE:37761;HK1_TE:37762;HK1_TE:37763;HK1_TE:37764	2	4
12	right	116962500	117362500	3.25773e-08	2.88818e-05	FBXW8	HK1_TE:37755;HK1_TE:37756;HK1_TE:37757	1	3
12	left	117177500	117255000	4.93848e-08	4.99934e-08	C12orf49;RNFT2	HK1_TE:37758	2	1
12	right	117252500	117317500	2.61502e-05	2.58117e-05	HRK	HK1_TE:37758	1	1
12	right	117255000	117357500	1.23281e-08	7.94644e-07	RP11-240G22.1;FBXW8	HK1_TE:37758	2	1
12	left	117627500	117785000	0.000212862	0.000214472	FBXO21	HK1_TE:37766;HK1_TE:37767;HK1_TE:37768;HK1_TE:37769;HK1_TE:37770;HK1_TE:37771;HK1_TE:37772;HK1_TE:37773	1	8
12	left	118495000	118542500	0.000106518	0.000107722	WSB2	HK1_TE:37778	1	1
12	left	118677500	118812500	4.65977e-09	7.15673e-12	RPS2P5	HK1_TE:37798;HK1_TE:37799	1	2
12	right	118677500	118812500	4.65977e-09	7.15673e-12	TAOK3;RP11-131L12.2;SUDS3	HK1_TE:37780;HK1_TE:37781	3	2
12	left	118677500	118712500	4.65977e-09	1.58805e-06	RPS2P5	HK1_TE:37782;HK1_TE:37783;HK1_TE:37784;HK1_TE:37785;HK1_TE:37786	1	5
12	right	118746666	118804166	3.74169e-05	2.60004e-07	TAOK3;RP11-131L12.2;SUDS3	HK1_TE:37787;HK1_TE:37788;HK1_TE:37789;HK1_TE:37790;HK1_TE:37791;HK1_TE:37792;HK1_TE:37793;HK1_TE:37794	3	8
12	left	120635000	120727500	0.0063959	4.71409e-06	GCN1L1;RPLP0;PXN-AS1	HK1_TE:37826;HK1_TE:37827	3	2
12	left	120632500	120667500	0.000706947	0.000660836	GCN1L1;RPLP0;PXN-AS1	HK1_TE:37816;HK1_TE:37817;HK1_TE:37818;HK1_TE:37819;HK1_TE:37820	3	5
12	left	120747500	120972500	0.000935164	4.43263e-06	SIRT4;RNU6-1088P	HK1_TE:37832;HK1_TE:37833	2	2
12	right	120747500	120972500	0.000935164	4.43263e-06	COQ5;RPL29P24;RNF10	HK1_TE:37828	3	1
12	left	120792500	120902500	3.59956e-10	3.54698e-10	MSI1;RPS27P25	HK1_TE:37830;HK1_TE:37831	2	2
12	right	120792500	120902500	3.59956e-10	3.54698e-10	RPL31P52;SRSF9;DYNLL1	HK1_TE:37829	3	1
12	left	120837500	121512500	1.20736e-05	1.79652e-05	RP1-166H1.2	HK1_TE:37846	1	1
12	right	120907500	121122500	7.54431e-07	7.09813e-07	MLEC;RP11-173P15.3	HK1_TE:37830;HK1_TE:37831	2	2
12	right	121025000	121135000	1.64105e-10	1.71228e-10	MLEC;RP11-173P15.3;UNC119B	HK1_TE:37834	3	1
12	left	121348333	121401666	1.49603e-07	1.69386e-07	SPPL3;CLIC1P1;RPL12P33	HK1_TE:37840;HK1_TE:37841;HK1_TE:37842;HK1_TE:37843;HK1_TE:37844;HK1_TE:37845	3	6
12	right	121348333	121401666	1.49603e-07	1.69386e-07	AC079602.1;HNF1A	HK1_TE:37837;HK1_TE:37838	2	2
12	left	121562500	121625000	0.0132829	0.0141149	P2RX7	HK1_TE:37848	1	1
12	left	122017500	122065000	1.88946e-13	4.5102e-10	KDM2B;RP13-941N14.1	HK1_TE:37855	2	1
12	left	122064500	122119500	0.000106518	1.75779e-06	ORAI1	HK1_TE:37856;HK1_TE:37857	1	2
12	right	122064500	122119500	0.000106518	1.75779e-06	MORN3	HK1_TE:37855	1	1
12	left	122062500	122222500	0.00252149	0.002365	ORAI1	HK1_TE:37859;HK1_TE:37860;HK1_TE:37861;HK1_TE:37862;HK1_TE:37863;HK1_TE:37864;HK1_TE:37865	1	7
12	right	122062500	122222500	0.00252149	0.002365	RP11-347I19.8	HK1_TE:37855	1	1
12	left	122140000	122220000	8.80143e-15	5.73593e-21	TMEM120B	HK1_TE:37859;HK1_TE:37860;HK1_TE:37861;HK1_TE:37862;HK1_TE:37863;HK1_TE:37864;HK1_TE:37865	1	7
12	left	122137142	122221428	5.23904e-15	4.75302e-15	TMEM120B	HK1_TE:37859;HK1_TE:37860;HK1_TE:37861;HK1_TE:37862;HK1_TE:37863;HK1_TE:37864;HK1_TE:37865	1	7
12	right	122137142	122221428	5.23904e-15	4.75302e-15	RP11-347I19.8	HK1_TE:37856;HK1_TE:37857	1	2
12	left	122343333	122383333	3.57316e-11	3.94221e-11	RNU7-170P;WDR66	HK1_TE:37878;HK1_TE:37879;HK1_TE:37880;HK1_TE:37881;HK1_TE:37882;HK1_TE:37883;HK1_TE:37884;HK1_TE:37885;HK1_TE:37886;HK1_TE:37887	2	10
12	right	122385000	123375000	6.35561e-06	1.19946e-05	VPS37B	HK1_TE:37878;HK1_TE:37879;HK1_TE:37880;HK1_TE:37881;HK1_TE:37882;HK1_TE:37883;HK1_TE:37884;HK1_TE:37885;HK1_TE:37886;HK1_TE:37887	1	10
12	left	122891388	122953611	1.06352e-28	7.19301e-23	RP11-450K4.1	HK1_TE:37913;HK1_TE:37914;HK1_TE:37915;HK1_TE:37916;HK1_TE:37917	1	5
12	left	122907500	122955000	3.95492e-21	4.88526e-16	CLIP1	HK1_TE:37913;HK1_TE:37914;HK1_TE:37915;HK1_TE:37916;HK1_TE:37917	1	5
12	left	123035000	123095000	7.92663e-07	0.000345325	RP11-324E6.8	HK1_TE:37919;HK1_TE:37920	1	2
12	left	123162500	123210000	0.000305398	0.0118064	RP11-324E6.6	HK1_TE:37940;HK1_TE:37941;HK1_TE:37942;HK1_TE:37943	1	4
12	right	123162500	123210000	0.000305398	0.0118064	HCAR1;HCAR3;RP11-324E6.9	HK1_TE:37924;HK1_TE:37925;HK1_TE:37926;HK1_TE:37927;HK1_TE:37928;HK1_TE:37929	3	6
12	right	123312500	123712500	3.86027e-08	3.6123e-08	C12orf65	HK1_TE:37947;HK1_TE:37948	1	2
12	left	123327500	123372500	3.74169e-05	3.6184e-05	HIP1R	HK1_TE:37952	1	1
12	right	123327500	123372500	3.74169e-05	3.6184e-05	VPS37B	HK1_TE:37947;HK1_TE:37948;HK1_TE:37949	1	3
12	left	123717500	123757500	3.74169e-05	3.6184e-05	MPHOSPH9;C12orf65	HK1_TE:37979	2	1
12	left	123757500	123867500	1.62876e-06	1.75779e-06	RP11-282O18.3;CDK2AP1;RP11-282O18.7;RNA5SP375	HK1_TE:37981;HK1_TE:37982	4	2
12	right	123757500	123867500	1.62876e-06	1.75779e-06	SETD8	HK1_TE:37979	1	1
12	left	123862500	124462500	3.0391e-06	3.80983e-06	SBNO1;hsa-mir-8072;SETD8	HK1_TE:37992;HK1_TE:37993	3	2
12	right	123862500	124462500	3.0391e-06	3.80983e-06	CCDC92;RP11-214K3.21;RP11-214K3.20;RP11-214K3.19;RP11-214K3.18;ZNF664;FAM101A	HK1_TE:37980;HK1_TE:37981;HK1_TE:37982	7	3
12	left	124067500	124117500	0.000251627	1.58805e-06	RP11-486O12.2;TMED2	HK1_TE:37989	2	1
12	left	124112500	124462500	1.40789e-07	1.3373e-12	SNORA9;EIF2B1;GTF2H3	HK1_TE:37992;HK1_TE:37993	3	2
12	right	124112500	124462500	1.40789e-07	1.3373e-12	CCDC92;RP11-214K3.21;RP11-214K3.20;RP11-214K3.19;RP11-214K3.18;ZNF664;FAM101A	HK1_TE:37989	7	1
12	left	124872500	124907500	7.68564e-05	6.60691e-07	RP11-408I18.9	HK1_TE:38002	1	1
12	left	124877500	125222500	4.83983e-06	0.000903509	RP11-408I18.9	HK1_TE:38025;HK1_TE:38026;HK1_TE:38027;HK1_TE:38028;HK1_TE:38029	1	5
12	right	124915500	125000500	7.51726e-11	1.48427e-08	RP11-83B20.1	HK1_TE:38002;HK1_TE:38003;HK1_TE:38004;HK1_TE:38005	1	4
12	left	125004166	125056666	1.78631e-05	9.92731e-08	RP11-83B20.1	HK1_TE:38008	1	1
12	left	125052500	125092500	0.000106518	0.000107722	NCOR2	HK1_TE:38013;HK1_TE:38014	1	2
12	left	125065000	125225000	2.86952e-05	3.08788e-05	NCOR2	HK1_TE:38025;HK1_TE:38026;HK1_TE:38027;HK1_TE:38028;HK1_TE:38029	1	5
12	right	125350000	125387500	0.000305398	3.98997e-06	RNU6-927P;UBC;MIR5188	HK1_TE:38030	3	1
12	right	125387500	125427500	0.00710829	0.000149481	RPL22P19	HK1_TE:38031	1	1
12	right	125392500	125477500	3.33902e-05	3.14579e-05	DHX37;BRI3BP	HK1_TE:38031	2	1
12	right	132342500	132432500	6.61137e-12	2.87413e-09	EP400	HK1_TE:38068;HK1_TE:38069;HK1_TE:38070;HK1_TE:38071;HK1_TE:38072;HK1_TE:38073;HK1_TE:38074;HK1_TE:38075;HK1_TE:38076	1	9
12	right	132862500	132902500	3.58784e-09	1.85699e-07	GALNT9;RP13-895J2.7	HK1_TE:38084;HK1_TE:38085;HK1_TE:38086	2	3
1	left	935000	1205000	4.14731e-07	5.26111e-05	RP11-54O7.17;HES4;RP11-54O7.10;RP11-54O7.11;ISG15	HK1_TE:19;HK1_TE:20	5	2
1	right	935000	1205000	4.14731e-07	5.26111e-05	UBE2J2;RP5-902P8.10;SCNN1D	HK1_TE:9;HK1_TE:10;HK1_TE:11	3	3
1	right	939000	1001000	1.02271e-09	1.10481e-09	RP11-54O7.14;RP11-465B22.3;RP11-54O7.18;RNF223	HK1_TE:9;HK1_TE:10;HK1_TE:11	4	3
1	left	957500	1167500	1.11207e-06	0.000312848	RP11-54O7.10;RP11-54O7.11;ISG15;AGRN	HK1_TE:15	4	1
1	right	957500	1167500	1.11207e-06	0.000312848	SDF4;B3GALT6;FAM132A	HK1_TE:11;HK1_TE:12	3	2
1	left	1095000	1205000	3.38388e-08	1.15125e-05	MIR200B;MIR200A;MIR429;RP11-465B22.8;TTLL10	HK1_TE:19;HK1_TE:20	5	2
1	right	1095000	1205000	3.38388e-08	1.15125e-05	UBE2J2;RP5-902P8.10;SCNN1D	HK1_TE:14	3	1
1	left	1097500	1167500	2.69181e-06	9.07266e-05	MIR200B;MIR200A;MIR429;RP11-465B22.8;TTLL10	HK1_TE:15	5	1
1	right	1097500	1167500	2.69181e-06	9.07266e-05	SDF4;B3GALT6;FAM132A	HK1_TE:14	3	1
1	left	1329166	1407500	2.61502e-05	0.000569427	CCNL2;RP4-758J18.2;MRPL20;RN7SL657P	HK1_TE:22	4	1
1	left	1337500	1377500	2.69181e-06	2.60856e-06	CCNL2;RP4-758J18.2;MRPL20;RN7SL657P;RP4-758J18.13	HK1_TE:21	5	1
1	left	1447500	1552500	0.000310193	3.20349e-05	ATAD3A	HK1_TE:25	1	1
1	right	1447500	1552500	0.000310193	3.20349e-05	RP11-345P4.9;MIB2;MMP23B	HK1_TE:23;HK1_TE:24	3	2
1	left	1510833	1550833	2.54803e-11	3.50333e-14	SSU72;AL645728.2;AL645728.1;AL645728.3	HK1_TE:25	4	1
1	right	1585000	1645000	0.000102578	0.00174042	MMP23A;CDK11A;RP1-283E3.4	HK1_TE:26	3	1
1	left	1980000	2067500	0.0106315	0.0105592	RP11-547D24.3;PRKCZ	HK1_TE:38;HK1_TE:39;HK1_TE:40;HK1_TE:41	2	4
1	left	2067500	2107500	8.7073e-05	9.07266e-05	RP5-892K4.1	HK1_TE:42;HK1_TE:43	1	2
1	right	2067500	2107500	8.7073e-05	9.07266e-05	RP11-181G12.2;AL590822.2	HK1_TE:38;HK1_TE:39;HK1_TE:40;HK1_TE:41	2	4
1	left	2157500	2222500	6.37632e-10	6.46816e-08	C1orf86;AL590822.1;RP11-181G12.5;RP11-181G12.4;SKI	HK1_TE:49	5	1
1	left	2157500	2247500	0.000935164	0.000903509	C1orf86;AL590822.1;RP11-181G12.5;RP11-181G12.4;SKI	HK1_TE:50;HK1_TE:51	5	2
1	right	2157500	2247500	0.000935164	0.000903509	RP4-713A8.1;AL589739.1	HK1_TE:44;HK1_TE:45	2	2
1	left	2344500	2466500	1.47558e-08	7.14901e-11	PEX10;PLCH2	HK1_TE:60;HK1_TE:61;HK1_TE:62;HK1_TE:63	2	4
1	right	2344500	2466500	1.47558e-08	7.14901e-11	PANK4;HES5;RP3-395M20.12	HK1_TE:53;HK1_TE:55	3	2
1	left	2347500	2427500	1.71582e-09	6.62417e-08	PEX10;PLCH2	HK1_TE:58;HK1_TE:59	2	2
1	right	2347500	2427500	1.71582e-09	6.62417e-08	RP3-395M20.2;RP3-395M20.3	HK1_TE:53;HK1_TE:54;HK1_TE:55	2	3
1	right	2382500	2467500	6.88926e-08	0.000172498	PANK4;HES5;RP3-395M20.12	HK1_TE:56;HK1_TE:57	3	2
1	right	2465000	2517500	7.55773e-05	2.60212e-06	RP3-395M20.9;FAM213B	HK1_TE:60;HK1_TE:61;HK1_TE:62;HK1_TE:63	2	4
1	right	3370000	3537500	7.20906e-10	5.85774e-10	MEGF6;RP11-46F15.2;TPRG1L	HK1_TE:67;HK1_TE:68	3	2
1	left	3485000	3535000	5.97259e-05	0.00248955	MIR551A	HK1_TE:97	1	1
1	right	3485000	3535000	5.97259e-05	0.00248955	MEGF6;RP11-46F15.2;TPRG1L	HK1_TE:92;HK1_TE:93;HK1_TE:94	3	3
1	left	6295000	6475000	9.88058e-05	2.80157e-06	ICMT;LINC00337;HES3	HK1_TE:135;HK1_TE:136	3	2
1	right	6295000	6475000	9.88058e-05	2.80157e-06	HES2;ESPN;MIR4252	HK1_TE:113;HK1_TE:114	3	2
1	left	6322500	6402500	7.5347e-06	6.87237e-06	GPR153	HK1_TE:125;HK1_TE:126;HK1_TE:127;HK1_TE:128;HK1_TE:129;HK1_TE:130;HK1_TE:131;HK1_TE:132	1	8
1	right	6775000	6845000	1.03286e-05	9.62415e-06	RP11-312B8.1;CAMTA1	HK1_TE:140	2	1
1	right	6802500	6842500	0.000310193	0.000290788	RP11-312B8.1;CAMTA1	HK1_TE:141	2	1
1	left	8037500	8077500	8.19217e-05	7.73116e-05	Y_RNA	HK1_TE:157;HK1_TE:158;HK1_TE:159;HK1_TE:160	1	4
1	right	8037500	8077500	8.19217e-05	7.73116e-05	ERRFI1;RP11-431K24.1	HK1_TE:155;HK1_TE:156	2	2
1	left	8087500	8157500	0.000840034	7.73116e-05	ERRFI1;RP11-431K24.1	HK1_TE:174;HK1_TE:175;HK1_TE:176;HK1_TE:177;HK1_TE:178;HK1_TE:179;HK1_TE:180	2	7
1	right	8155000	8265000	0.00029126	0.0117552	RNU1-7P;RP11-431K24.3	HK1_TE:174;HK1_TE:175;HK1_TE:176;HK1_TE:177;HK1_TE:178;HK1_TE:179;HK1_TE:180	2	7
1	left	8935000	8972500	0.0361605	0.00660905	ENO1;ENO1-IT1;ENO1-AS1;RNU6-304P	HK1_TE:201;HK1_TE:202;HK1_TE:203	4	3
1	right	8935000	8972500	0.0361605	0.00660905	RP3-477M7.5;RP3-477M7.6	HK1_TE:198;HK1_TE:199;HK1_TE:200	2	3
1	right	8972500	9047500	0.00164913	0.00157116	RN7SL451P	HK1_TE:201;HK1_TE:202;HK1_TE:203	1	3
1	right	9887500	9972500	3.96541e-14	3.50333e-14	CTNNBIP1	HK1_TE:218;HK1_TE:219;HK1_TE:221	1	3
1	left	10438750	10483750	1.88783e-13	1.69412e-13	RN7SL721P	HK1_TE:236;HK1_TE:237;HK1_TE:238;HK1_TE:239	1	4
1	right	10438750	10483750	1.88783e-13	1.69412e-13	RP4-736L20.3;APITD1;APITD1-CORT	HK1_TE:231;HK1_TE:232;HK1_TE:233;HK1_TE:234;HK1_TE:235	3	5
1	left	11907500	11955833	0.0692822	0.0738984	NPPA-AS1;NPPA;NPPB	HK1_TE:286;HK1_TE:287;HK1_TE:288	3	3
1	right	12202500	12237500	7.55773e-05	0.0141149	TNFRSF1B;MIR4632	HK1_TE:300;HK1_TE:301;HK1_TE:302	2	3
1	right	12377500	12678750	6.88926e-08	4.44343e-06	DHRS3;RP11-474O21.5	HK1_TE:305;HK1_TE:306	2	2
1	left	13915000	13975000	3.32331e-05	3.50901e-05	PDPN	HK1_TE:313	1	1
1	left	15487500	16012500	0.000155583	0.000228522	TMEM51-AS1;TMEM51;C1orf195	HK1_TE:353;HK1_TE:354	3	2
1	right	15487500	16012500	0.000155583	0.000228522	RP4-680D5.9;PLEKHM2;AL121992.1	HK1_TE:324;HK1_TE:328	3	2
1	left	15527500	15597500	0.000212862	0.00302692	RP1-21O18.3	HK1_TE:333;HK1_TE:334;HK1_TE:335;HK1_TE:336	1	4
1	right	15547500	15587500	0.000366955	0.000394918	FHAD1	HK1_TE:331;HK1_TE:332	1	2
1	left	15887500	15942500	4.37449e-06	4.71409e-06	RP4-680D5.8	HK1_TE:352	1	1
1	right	15887500	15942500	4.37449e-06	4.71409e-06	RP4-680D5.2;CHCHD2P6;RNU7-179P;RP4-680D5.4;DDI2	HK1_TE:351	5	1
1	right	15922500	16067500	5.56385e-06	4.98605e-06	RP11-288I21.1;SLC25A34;RP11-169K16.4;TMEM82	HK1_TE:352	4	1
1	right	16009166	16089166	8.6409e-06	8.4562e-06	RP11-169K16.4;FBLIM1	HK1_TE:353;HK1_TE:354	2	2
1	right	16012500	16067500	0.000571434	0.000572385	RP11-288I21.1;SLC25A34;RP11-169K16.4;TMEM82	HK1_TE:353;HK1_TE:354	4	2
1	left	16120000	16277500	1.62876e-06	1.75779e-06	RP11-169K16.6;RP11-169K16.7	HK1_TE:361;HK1_TE:362;HK1_TE:363	2	3
1	left	16121666	16238333	2.11936e-06	2.28628e-06	RP11-169K16.6;RP11-169K16.7	HK1_TE:357;HK1_TE:358;HK1_TE:359;HK1_TE:360	2	4
1	left	16482500	16567500	0.00283092	0.00302692	EPHA2;RP11-276H7.2;RP11-276H7.3	HK1_TE:381;HK1_TE:382;HK1_TE:383	3	3
1	left	16532500	16570000	0.000805646	3.44204e-05	ARHGEF19-AS1;ARHGEF19	HK1_TE:381;HK1_TE:382;HK1_TE:383	2	3
1	right	16532500	16570000	0.000805646	3.44204e-05	C1orf134;RSG1;MT1XP1	HK1_TE:378;HK1_TE:379;HK1_TE:380	3	3
1	left	16857500	16952500	0.00752639	0.00157116	RP4-798A10.4;U1;AL355149.2	HK1_TE:397;HK1_TE:398	3	2
1	right	16857500	16952500	0.00752639	0.00157116	NBPF1;RP5-1182A14.5	HK1_TE:391;HK1_TE:392;HK1_TE:393	2	3
1	right	17232500	17332500	7.53704e-05	6.83078e-05	ATP13A2	HK1_TE:409;HK1_TE:410;HK1_TE:411;HK1_TE:412;HK1_TE:413;HK1_TE:414	1	6
1	right	17277500	17335000	2.10534e-07	2.27903e-07	ATP13A2	HK1_TE:418	1	1
1	left	17457500	17497500	0.000366955	0.000394918	PADI2	HK1_TE:423;HK1_TE:424;HK1_TE:425;HK1_TE:426;HK1_TE:427	1	5
1	right	17457500	17497500	0.000366955	0.000394918	Y_RNA	HK1_TE:419;HK1_TE:420;HK1_TE:421;HK1_TE:422	1	4
1	left	17542500	17617500	1.56416e-07	1.59886e-07	PADI1	HK1_TE:439;HK1_TE:440;HK1_TE:441;HK1_TE:442;HK1_TE:443;HK1_TE:444;HK1_TE:445;HK1_TE:446;HK1_TE:447;HK1_TE:448;HK1_TE:449;HK1_TE:450;HK1_TE:451	1	13
1	right	17542500	17617500	1.56416e-07	1.59886e-07	MIR3972	HK1_TE:436	1	1
1	left	17577500	17662500	0.000220834	0.000230206	PADI3	HK1_TE:452;HK1_TE:453;HK1_TE:454	1	3
1	right	17577500	17662500	0.000220834	0.000230206	AC004824.2	HK1_TE:437;HK1_TE:438	1	2
1	left	17602500	17662500	3.32465e-05	3.44204e-05	MIR3972	HK1_TE:452;HK1_TE:453;HK1_TE:454	1	3
1	right	17602500	17662500	3.32465e-05	3.44204e-05	AC004824.2	HK1_TE:438;HK1_TE:439;HK1_TE:440;HK1_TE:441;HK1_TE:442;HK1_TE:443;HK1_TE:444	1	7
1	left	17767500	17817500	0.00016076	4.44343e-06	RCC2;snoU13	HK1_TE:460;HK1_TE:461	2	2
1	left	17767500	17887500	0.0025542	0.000236297	RCC2;snoU13	HK1_TE:464;HK1_TE:465;HK1_TE:466;HK1_TE:467;HK1_TE:468;HK1_TE:469;HK1_TE:470	2	7
1	right	19362500	19402500	5.96206e-07	4.93114e-05	RP5-1126H10.2;AL137127.1	HK1_TE:480	2	1
1	right	19658333	19981666	4.11602e-07	3.79857e-10	NBL1;HTR6	HK1_TE:487	2	1
1	left	19812500	19974166	2.61502e-05	2.58117e-05	CAPZB	HK1_TE:499	1	1
1	left	19922500	19970000	0.00016076	0.000172498	RP5-1056L3.1;MINOS1-NBL1;MINOS1;RPS14P3	HK1_TE:499	4	1
1	right	20087500	20812500	0.000161705	0.000209396	CAMK2N1	HK1_TE:500;HK1_TE:501;HK1_TE:502;HK1_TE:503;HK1_TE:504	1	5
1	right	20087500	20127500	2.48316e-08	2.66548e-08	TMCO4;RNF186;RP11-91K11.2	HK1_TE:500;HK1_TE:501;HK1_TE:502;HK1_TE:503;HK1_TE:504	3	5
1	left	20492500	20822500	8.6409e-06	8.4562e-06	RP3-340N1.2;PLA2G2C	HK1_TE:530;HK1_TE:531;HK1_TE:532;HK1_TE:533	2	4
1	right	20492500	20822500	8.6409e-06	8.4562e-06	CAMK2N1;MUL1	HK1_TE:505;HK1_TE:506;HK1_TE:507;HK1_TE:508	2	4
1	right	20537500	20755000	2.84275e-09	2.62391e-09	RP4-749H3.1	HK1_TE:509;HK1_TE:510;HK1_TE:511;HK1_TE:512;HK1_TE:513;HK1_TE:514;HK1_TE:515;HK1_TE:516;HK1_TE:517	1	9
1	right	20685000	20755000	6.6368e-05	7.04169e-05	RP4-749H3.1	HK1_TE:525;HK1_TE:526	1	2
1	right	20687500	20817500	3.14675e-10	1.02528e-12	CAMK2N1	HK1_TE:525;HK1_TE:526	1	2
1	left	20752500	20817500	0.00016076	0.000172498	RP4-749H3.1;RP4-749H3.2	HK1_TE:528;HK1_TE:529;HK1_TE:530;HK1_TE:531;HK1_TE:532;HK1_TE:533	2	6
1	left	20987500	21057500	3.33902e-05	0.000572385	PINK1-AS;AL391357.1;DDOST	HK1_TE:540;HK1_TE:541	3	2
1	left	21582500	21672500	2.61502e-05	0.000569427	RP3-329E20.2	HK1_TE:559;HK1_TE:560	1	2
1	right	21582500	21672500	2.61502e-05	0.000569427	ECE1	HK1_TE:553;HK1_TE:554	1	2
1	left	21587500	21662500	2.61502e-05	0.000569427	RP3-329E20.2	HK1_TE:555;HK1_TE:556;HK1_TE:557;HK1_TE:558;HK1_TE:559;HK1_TE:560	1	6
1	right	21587500	21662500	2.61502e-05	0.000569427	ECE1	HK1_TE:553;HK1_TE:554	1	2
1	left	21727500	21767500	3.58784e-09	1.85699e-07	PPP1R11P1;RP11-293F5.8;RP11-293F5.1	HK1_TE:568	3	1
1	right	21727500	21767500	3.58784e-09	1.85699e-07	NBPF2P;HS6ST1P1;CROCCP5;NBPF3	HK1_TE:563;HK1_TE:564;HK1_TE:565;HK1_TE:566	4	4
1	right	22197500	22352500	2.43743e-07	2.31256e-07	RP1-224A6.3;LINC00339	HK1_TE:595;HK1_TE:596;HK1_TE:597;HK1_TE:598	2	4
1	right	22282500	22350500	0.0290919	0.00191662	RN7SL186P;RNU6-776P;RP1-224A6.3;LINC00339	HK1_TE:601;HK1_TE:602;HK1_TE:603	4	3
1	left	22345000	22395000	0.00481181	0.00517366	RN7SL768P;RN7SL186P;RNU6-776P;RP1-224A6.3;LINC00339	HK1_TE:613;HK1_TE:614	5	2
1	right	22345000	22395000	0.00481181	0.00517366	CDC42-IT1;RP1-224A6.8	HK1_TE:608;HK1_TE:609;HK1_TE:610	2	3
1	left	22457500	22740000	2.81287e-07	4.43263e-06	WNT4	HK1_TE:617;HK1_TE:618;HK1_TE:619	1	3
1	left	23035000	23075000	6.92731e-05	7.43645e-05	EPHB2;MIR4684	HK1_TE:621;HK1_TE:622;HK1_TE:623;HK1_TE:624	2	4
1	left	23155000	23525000	5.11039e-05	0.0007726	RP11-69E9.1	HK1_TE:642;HK1_TE:643	1	2
1	left	23155000	23885000	8.91659e-07	0.00042092	RP11-69E9.1	HK1_TE:666;HK1_TE:667;HK1_TE:668;HK1_TE:669	1	4
1	left	23305000	23595000	4.14731e-07	3.62742e-07	LACTBL1	HK1_TE:645;HK1_TE:646;HK1_TE:647;HK1_TE:648;HK1_TE:649;HK1_TE:650;HK1_TE:651;HK1_TE:652	1	8
1	left	23425000	23600000	3.94776e-09	3.92727e-06	RP1-184J9.2	HK1_TE:647;HK1_TE:648;HK1_TE:649;HK1_TE:650;HK1_TE:651;HK1_TE:652	1	6
1	right	23425000	23600000	3.94776e-09	3.92727e-06	RP5-1057J7.6	HK1_TE:628;HK1_TE:629;HK1_TE:630;HK1_TE:638	1	4
1	left	23457500	23492500	7.27511e-07	0.00014505	RP5-979D14.1	HK1_TE:640;HK1_TE:641	1	2
1	right	23457500	23492500	7.27511e-07	0.00014505	LUZP1;RNU6-514P;RNU6-135P	HK1_TE:632;HK1_TE:633;HK1_TE:634;HK1_TE:635;HK1_TE:636;HK1_TE:637	3	6
1	left	23522500	23587500	4.85588e-07	4.98874e-07	HTR1D	HK1_TE:645;HK1_TE:646;HK1_TE:647;HK1_TE:648;HK1_TE:649	1	5
1	right	23885000	24105000	8.88824e-06	7.97981e-06	RP5-886K2.3;PITHD1;LYPLA2	HK1_TE:666;HK1_TE:667;HK1_TE:668;HK1_TE:669	3	4
1	left	23881250	23920000	1.28573e-08	1.36649e-08	RP1-150O5.3;ID3	HK1_TE:672;HK1_TE:673;HK1_TE:674;HK1_TE:675;HK1_TE:676;HK1_TE:677	2	6
1	right	23881250	23920000	1.28573e-08	1.36649e-08	MDS2	HK1_TE:665;HK1_TE:666;HK1_TE:667;HK1_TE:668;HK1_TE:669	1	5
1	right	24232500	24377500	0	1.19828e-22	RP11-293P20.2	HK1_TE:683	1	1
1	left	24477500	24515000	0.020929	0.00183873	IL22RA1	HK1_TE:693;HK1_TE:694	1	2
1	right	24477500	24515000	0.020929	0.00183873	IFNLR1;RP11-10N16.2	HK1_TE:691;HK1_TE:692	2	2
1	right	24524166	24965833	0.0106315	0.00220262	Y_RNA;SRRM1	HK1_TE:693;HK1_TE:694	2	2
1	left	24647500	24740000	4.65977e-09	4.9474e-09	RP11-10N16.3;GRHL3	HK1_TE:705;HK1_TE:706	2	2
1	right	24745000	25075000	9.88058e-05	0.0021394	CLIC4	HK1_TE:705;HK1_TE:706	1	2
1	left	24970000	25007500	0.0349543	0.00376037	SRRM1	HK1_TE:710;HK1_TE:711;HK1_TE:712;HK1_TE:713;HK1_TE:714	1	5
1	right	25010000	25075000	2.86952e-05	3.08788e-05	CLIC4	HK1_TE:710;HK1_TE:711;HK1_TE:712;HK1_TE:713;HK1_TE:714	1	5
1	right	25032500	25072500	1.28573e-08	1.36649e-08	CLIC4	HK1_TE:715;HK1_TE:716;HK1_TE:717	1	3
1	left	25442500	25532500	7.53704e-05	4.43263e-06	RP4-799D16.1;RP4-781L3.1	HK1_TE:724;HK1_TE:725	2	2
1	left	25562500	25762500	5.25386e-09	4.81074e-09	SYF2;RP3-465N24.6	HK1_TE:728	2	1
1	right	25562500	25762500	5.25386e-09	4.81074e-09	RHCE;TMEM57	HK1_TE:726	2	1
1	left	26435000	26605000	5.38407e-05	7.05863e-08	PDIK1L	HK1_TE:748;HK1_TE:749	1	2
1	right	26435000	26605000	5.38407e-05	7.05863e-08	SH3BGRL3	HK1_TE:740;HK1_TE:741;HK1_TE:742	1	3
1	left	26562500	26605000	2.14326e-06	2.32365e-06	CEP85	HK1_TE:748;HK1_TE:749	1	2
1	left	26605000	26725000	4.75739e-09	4.9366e-09	SH3BGRL3	HK1_TE:759;HK1_TE:760;HK1_TE:761;HK1_TE:762;HK1_TE:763;HK1_TE:764	1	6
1	right	26605000	26725000	4.75739e-09	4.9366e-09	LIN28A	HK1_TE:748;HK1_TE:749	1	2
1	left	26605000	26647500	4.85931e-05	4.93114e-05	SH3BGRL3	HK1_TE:751;HK1_TE:752	1	2
1	right	26605000	26647500	4.85931e-05	4.93114e-05	UBXN11;CD52;RP11-569G9.7	HK1_TE:748;HK1_TE:749	3	2
1	left	26647500	26717500	0.000220834	0.000230206	UBXN11;CD52;RP11-569G9.7	HK1_TE:757;HK1_TE:758;HK1_TE:759;HK1_TE:760;HK1_TE:761;HK1_TE:762;HK1_TE:763;HK1_TE:764	3	8
1	right	26825000	26920000	0.0192629	0.000579839	RN7SL679P;Y_RNA	HK1_TE:765	2	1
1	left	26930000	27205000	0.00476301	0.000370864	RN7SL679P;Y_RNA	HK1_TE:793;HK1_TE:794;HK1_TE:795;HK1_TE:796;HK1_TE:797	2	5
1	right	26930000	27205000	0.00476301	0.000370864	RP1-50O24.6;GPN2	HK1_TE:769	2	1
1	left	27027500	27187500	0.000220834	0.000230206	RP5-968P14.2;ARID1A	HK1_TE:789;HK1_TE:790;HK1_TE:791;HK1_TE:792;HK1_TE:793;HK1_TE:794;HK1_TE:795	2	7
1	right	27027500	27187500	0.000220834	0.000230206	SFN	HK1_TE:773;HK1_TE:774;HK1_TE:777	1	3
1	left	27023833	27102500	2.67372e-12	2.6175e-12	RP5-968P14.2;ARID1A	HK1_TE:783;HK1_TE:784;HK1_TE:785;HK1_TE:786	2	4
1	right	27023833	27102500	2.67372e-12	2.6175e-12	RN7SL501P;PIGV	HK1_TE:773;HK1_TE:774;HK1_TE:777	2	3
1	left	27135000	27195000	3.53965e-07	3.6873e-07	RN7SL165P	HK1_TE:792;HK1_TE:793;HK1_TE:794;HK1_TE:795;HK1_TE:796	1	5
1	right	27135000	27195000	3.53965e-07	3.6873e-07	SFN;RP1-50O24.6	HK1_TE:787;HK1_TE:788	2	2
1	left	27187500	27337500	4.39435e-09	1.63551e-11	SFN	HK1_TE:800	1	1
1	right	27187500	27337500	4.39435e-09	1.63551e-11	FAM46B	HK1_TE:789;HK1_TE:790;HK1_TE:791;HK1_TE:792;HK1_TE:793;HK1_TE:794;HK1_TE:795	1	7
1	left	27289166	27329166	9.38612e-08	9.92731e-08	C1orf172	HK1_TE:800	1	1
1	left	27324166	27367500	2.10534e-07	2.27903e-07	RP11-344H11.5;OSTCP2;TRNP1	HK1_TE:801;HK1_TE:802;HK1_TE:803	3	3
1	left	27325833	27424166	0.000106711	0.000100568	OSTCP2;TRNP1;FAM46B	HK1_TE:805;HK1_TE:806;HK1_TE:807	3	3
1	right	27437500	27712500	2.64945e-07	2.45309e-07	FCN3;CD164L2;RP1-144C9.2;GPR3	HK1_TE:805;HK1_TE:806;HK1_TE:807;HK1_TE:808;HK1_TE:809	4	5
1	left	27528333	27605000	0.000509931	0.000505776	CHCHD3P3;NPM1P39;SNRPEP7	HK1_TE:820;HK1_TE:821	3	2
1	left	27625000	27935000	0.000284503	0.00026845	RP11-4K3__A.3	HK1_TE:829	1	1
1	right	27625000	27935000	0.000284503	0.00026845	AHDC1	HK1_TE:820;HK1_TE:821;HK1_TE:822;HK1_TE:823	1	4
1	left	27720000	27987500	1.40892e-06	4.04891e-08	CD164L2;RP1-144C9.2;GPR3	HK1_TE:830;HK1_TE:831	3	2
1	left	27936250	27991250	1.86345e-20	1.6733e-20	AHDC1	HK1_TE:830;HK1_TE:831	1	2
1	right	27936250	27991250	1.86345e-20	1.6733e-20	RP11-288L9.1;IFI6;RP11-288L9.4;RNU6-949P	HK1_TE:829	4	1
1	left	28417500	28467500	3.79764e-06	3.58794e-06	EYA3;SPCS2P4	HK1_TE:846;HK1_TE:847;HK1_TE:848;HK1_TE:849	2	4
1	left	28584166	28695833	1.46905e-06	7.43645e-05	RP5-1092A3.5;SESN2	HK1_TE:866;HK1_TE:867;HK1_TE:868;HK1_TE:869;HK1_TE:870;HK1_TE:871;HK1_TE:872	2	7
1	right	28584166	28695833	1.46905e-06	7.43645e-05	PHACTR4	HK1_TE:856;HK1_TE:857;HK1_TE:858	1	3
1	left	28845000	29205000	2.65944e-06	5.07213e-08	RCC1;SNHG3;SNORA73B;snoU13;PRDX3P2	HK1_TE:897;HK1_TE:898	5	2
1	right	28845000	29205000	2.65944e-06	5.07213e-08	RP1-212P9.2;RP1-212P9.3;Y_RNA;EPB41	HK1_TE:881;HK1_TE:882;HK1_TE:883;HK1_TE:884;HK1_TE:885;HK1_TE:886;HK1_TE:887;HK1_TE:888;HK1_TE:889	4	9
1	left	28979500	29062500	2.54803e-11	2.50803e-11	TAF12;RP11-442N24__B.1;RNU11	HK1_TE:895	3	1
1	left	28995000	29215000	0.00380513	0.00366416	GMEB1	HK1_TE:897;HK1_TE:898	1	2
1	left	30117500	30182500	0.020929	0.00183873	AC092265.1	HK1_TE:931;HK1_TE:932;HK1_TE:933;HK1_TE:934	1	4
1	right	30117500	30182500	0.020929	0.00183873	RP4-656G21.1	HK1_TE:928;HK1_TE:929;HK1_TE:930	1	3
1	right	30182500	31192500	0.00153413	0.00480671	MATN1;MATN1-AS1	HK1_TE:931;HK1_TE:932;HK1_TE:933;HK1_TE:934	2	4
1	left	31192500	31227500	3.10549e-07	2.95712e-07	MATN1;MATN1-AS1	HK1_TE:942;HK1_TE:943;HK1_TE:944	2	3
1	left	31577500	31627500	0.000220834	0.000230206	SEPW1P;RP11-490K7.1	HK1_TE:955;HK1_TE:956;HK1_TE:957	2	3
1	right	31657500	32047500	5.46886e-11	4.98527e-11	RP11-73M7.1;TINAGL1	HK1_TE:958;HK1_TE:959	2	2
1	right	31865000	31902500	2.86262e-05	4.98874e-07	AC114494.1	HK1_TE:960;HK1_TE:961;HK1_TE:962;HK1_TE:963;HK1_TE:964	1	5
1	left	31881666	32025000	0.00156606	4.26441e-06	SERINC2	HK1_TE:985;HK1_TE:986;HK1_TE:987;HK1_TE:988;HK1_TE:989;HK1_TE:990;HK1_TE:991	1	7
1	left	32122500	32254166	0.0182713	0.0179087	PEF1;RP11-73M7.6;RP11-73M7.9	HK1_TE:1003;HK1_TE:1004;HK1_TE:1005	3	3
1	right	32122500	32254166	0.0182713	0.0179087	RP11-84A19.3	HK1_TE:998	1	1
1	left	32402500	32535000	7.54431e-07	2.58117e-05	PTP4A2;RP4-534N18.2	HK1_TE:1009	2	1
1	right	32402500	32535000	7.54431e-07	2.58117e-05	RP11-277A4.4;TMEM39B	HK1_TE:1006;HK1_TE:1007	2	2
1	right	33077500	33117500	0.000966918	0.000973973	ZBTB8OS;Y_RNA;RBBP4	HK1_TE:1022	3	1
1	left	33115000	33275000	0.0027306	1.71666e-05	ZBTB8OS;Y_RNA;RBBP4	HK1_TE:1041;HK1_TE:1042;HK1_TE:1043;HK1_TE:1044;HK1_TE:1045	3	5
1	right	33175000	33335000	0.000773838	0.000742353	FNDC5	HK1_TE:1023;HK1_TE:1024	1	2
1	left	33181666	33240000	1.18608e-12	1.02528e-12	SYNC;RP11-114B7.6	HK1_TE:1032;HK1_TE:1033;HK1_TE:1034;HK1_TE:1035;HK1_TE:1036;HK1_TE:1037;HK1_TE:1038	2	7
1	right	33237500	33282500	0.000305398	0.000294535	YARS;S100PBP	HK1_TE:1032;HK1_TE:1033;HK1_TE:1034;HK1_TE:1035;HK1_TE:1036;HK1_TE:1037	2	6
1	left	33397500	33522500	1.27911e-09	1.20577e-09	AL031602.1	HK1_TE:1049	1	1
1	left	33555000	33595000	0.0568906	0.057343	AK2;ADC	HK1_TE:1055;HK1_TE:1056	2	2
1	right	33565000	33815000	0.00515142	0.00013487	RN7SKP16;RP11-415J8.5	HK1_TE:1050;HK1_TE:1051;HK1_TE:1052;HK1_TE:1053;HK1_TE:1054	2	5
1	right	33592500	33647500	0.000366955	0.000394918	TRIM62	HK1_TE:1055;HK1_TE:1056	1	2
1	right	33685000	33762500	8.7073e-05	9.07266e-05	AL513327.1;RP11-415J8.3	HK1_TE:1057	2	1
1	left	33762500	33832500	7.55773e-05	2.60212e-06	AL513327.1;RP11-415J8.3	HK1_TE:1066	2	1
1	left	33815000	33897500	8.7073e-05	0.00183873	RN7SKP16;RP11-415J8.5	HK1_TE:1067;HK1_TE:1068;HK1_TE:1069;HK1_TE:1070	2	4
1	right	33815000	33897500	8.7073e-05	0.00183873	PHC2;AL138837.1	HK1_TE:1060;HK1_TE:1061;HK1_TE:1062;HK1_TE:1063;HK1_TE:1064;HK1_TE:1065;HK1_TE:1066	2	7
1	left	35235000	35545000	0.000108308	0.000118409	GJB5;GJB4;AL121988.1;GJB3	HK1_TE:1076;HK1_TE:1077	4	2
1	left	35249166	35320833	8.2875e-07	7.94644e-07	RP1-34M23.5;AL121988.1;GJB3;GJA4	HK1_TE:1074;HK1_TE:1075	4	2
1	right	35249166	35320833	8.2875e-07	7.94644e-07	SMIM12;RP5-997D16.2	HK1_TE:1072;HK1_TE:1073	2	2
1	left	36397500	36472500	0.000477668	0.000480229	RP4-789D17.5;AGO3	HK1_TE:1079;HK1_TE:1080	2	2
1	left	36562500	36887500	0.000394877	5.94844e-05	RP4-665N4.4;TEKT2;ADPRHL2	HK1_TE:1100;HK1_TE:1101;HK1_TE:1102;HK1_TE:1103;HK1_TE:1104	3	5
1	right	36562500	36887500	0.000394877	5.94844e-05	SNORA63	HK1_TE:1081	1	1
1	left	36630833	36849166	5.63463e-16	1.93217e-13	MAP7D1	HK1_TE:1091;HK1_TE:1092;HK1_TE:1093;HK1_TE:1094;HK1_TE:1095;HK1_TE:1096;HK1_TE:1097;HK1_TE:1098;HK1_TE:1099	1	9
1	left	36615833	36757500	6.88926e-08	6.46816e-08	TRAPPC3;MAP7D1	HK1_TE:1088	2	1
1	right	36615833	36757500	6.88926e-08	6.46816e-08	SH3D21	HK1_TE:1082	1	1
1	left	36852500	36895833	0.00254841	0.00265048	STK40;LSM10	HK1_TE:1100;HK1_TE:1101;HK1_TE:1102;HK1_TE:1103;HK1_TE:1104;HK1_TE:1105	2	6
1	right	36852500	36895833	0.00254841	0.00265048	SNORA63	HK1_TE:1092;HK1_TE:1093;HK1_TE:1094;HK1_TE:1095;HK1_TE:1096;HK1_TE:1097;HK1_TE:1098;HK1_TE:1099	1	8
1	left	37930000	38042500	0.0462165	0.0499741	RP11-422J8.1;ZC3H12A	HK1_TE:1116;HK1_TE:1117;HK1_TE:1118;HK1_TE:1119	2	4
1	right	37945000	38065000	0.00278761	0.00300023	GNL2	HK1_TE:1108;HK1_TE:1109;HK1_TE:1110	1	3
1	left	37936250	37992500	9.38612e-08	1.71738e-05	RP11-422J8.1;ZC3H12A	HK1_TE:1112;HK1_TE:1113;HK1_TE:1114;HK1_TE:1115	2	4
1	right	37936250	37992500	9.38612e-08	1.71738e-05	MEAF6	HK1_TE:1108	1	1
1	left	37942500	38017500	2.13594e-05	2.20414e-05	RP11-422J8.1;ZC3H12A	HK1_TE:1115;HK1_TE:1116;HK1_TE:1117	2	3
1	right	37942500	38017500	2.13594e-05	2.20414e-05	SNIP1;FTH1P1;RP3-423B22.5;DNALI1	HK1_TE:1108;HK1_TE:1109;HK1_TE:1110	4	3
1	left	37982500	38017500	0.000477668	0.000480229	MEAF6	HK1_TE:1115;HK1_TE:1116;HK1_TE:1117	1	3
1	left	38065000	38325000	2.28837e-07	0.00026845	GNL2	HK1_TE:1121;HK1_TE:1122	1	2
1	right	38050000	38152500	5.47504e-10	4.73747e-10	C1orf109;CDCA8	HK1_TE:1118;HK1_TE:1119	2	2
1	left	38330000	38457500	0.00125972	7.54171e-05	MTF1;RP11-109P14.10	HK1_TE:1127	2	1
1	right	38330000	38457500	0.00125972	7.54171e-05	SF3A3;RNU6-510P;FHL3	HK1_TE:1121;HK1_TE:1122	3	2
1	right	38475000	39487500	0.00153746	0.00227607	NDUFS5	HK1_TE:1127;HK1_TE:1128	1	2
1	left	39335000	39425000	1.04659e-08	8.29984e-06	RRAGC;RP5-864K19.4;MYCBP;GJA9	HK1_TE:1137;HK1_TE:1138;HK1_TE:1139;HK1_TE:1140	4	4
1	right	40285000	40505000	0.00179393	5.00013e-05	CAP1	HK1_TE:1154	1	1
1	right	40282500	40362500	0.000935164	6.83078e-05	TRIT1;MYCL;RP1-118J21.5	HK1_TE:1154	3	1
1	right	40385000	40500000	0.000840034	0.00660905	CAP1	HK1_TE:1158	1	1
1	left	40437500	40505000	0.0290919	0.0286881	RP3-342P20.2	HK1_TE:1177;HK1_TE:1178	1	2
1	right	40437500	40505000	0.0290919	0.0286881	CAP1	HK1_TE:1159;HK1_TE:1160;HK1_TE:1161;HK1_TE:1162;HK1_TE:1163;HK1_TE:1164;HK1_TE:1176	1	7
1	left	40997500	41157500	0.000106711	4.98605e-06	RP11-656D10.6;ZNF684	HK1_TE:1187	2	1
1	left	41075000	41412500	9.67448e-07	9.49914e-07	GTF2F2P2	HK1_TE:1192;HK1_TE:1193	1	2
1	left	41157500	41445000	0.0350608	0.00675161	RP4-739H11.3;RP4-739H11.4;NFYC	HK1_TE:1194;HK1_TE:1195;HK1_TE:1196;HK1_TE:1197	3	4
1	right	41157500	41445000	0.0350608	0.00675161	CTPS1	HK1_TE:1187	1	1
1	left	41827500	41962500	0.00708501	0.00675161	FOXO6;RP11-399E6.4	HK1_TE:1216;HK1_TE:1217;HK1_TE:1218;HK1_TE:1219;HK1_TE:1220;HK1_TE:1221	2	6
1	right	41827500	41962500	0.00708501	0.00675161	EDN2	HK1_TE:1209;HK1_TE:1210;HK1_TE:1211;HK1_TE:1212	1	4
1	left	41957500	42137500	0.00164913	0.00157116	EDN2	HK1_TE:1222;HK1_TE:1223;HK1_TE:1224;HK1_TE:1225;HK1_TE:1226;HK1_TE:1227;HK1_TE:1228	1	7
1	left	42642500	42807500	0.00145157	0.000100568	GUCA2A	HK1_TE:1247	1	1
1	right	42642500	42807500	0.00145157	0.000100568	FOXJ3;RP11-223A3.1	HK1_TE:1238;HK1_TE:1239;HK1_TE:1240;HK1_TE:1241	2	4
1	right	42805000	42915000	8.6409e-06	0.000230206	ZMYND12;PPCS;CCDC30	HK1_TE:1247	3	1
1	right	43405000	43825000	0.000981937	0.0113628	RP1-92O14.3;CDC20;ELOVL1	HK1_TE:1253;HK1_TE:1254;HK1_TE:1255;HK1_TE:1256;HK1_TE:1257	3	5
1	left	43635000	44115000	0.00711511	0.0007726	WDR65	HK1_TE:1304;HK1_TE:1305	1	2
1	left	43835000	43995000	0.000121884	0.000119115	RP1-92O14.3;CDC20;ELOVL1	HK1_TE:1293;HK1_TE:1294;HK1_TE:1295;HK1_TE:1296;HK1_TE:1297	3	5
1	right	43835000	43995000	0.000121884	0.000119115	PTPRF	HK1_TE:1283	1	1
1	left	43835000	44495000	0.00476301	0.00478898	RP1-92O14.3;CDC20;ELOVL1	HK1_TE:1320;HK1_TE:1321;HK1_TE:1322;HK1_TE:1323;HK1_TE:1324	3	5
1	right	43835000	44495000	0.00476301	0.00478898	SLC6A9;RP5-1198O20.4	HK1_TE:1283	2	1
1	left	43919166	43987500	0.000805646	0.000868542	SZT2-AS1;HYI;HYI-AS1	HK1_TE:1291;HK1_TE:1292;HK1_TE:1293;HK1_TE:1294;HK1_TE:1295;HK1_TE:1296;HK1_TE:1297	3	7
1	left	44125000	44405833	1.99973e-07	1.85699e-07	KDM4A	HK1_TE:1319	1	1
1	right	44125000	44405833	1.99973e-07	1.85699e-07	ARTN;RP11-7O11.3;IPO13	HK1_TE:1305;HK1_TE:1306;HK1_TE:1307	3	3
1	left	44127500	44502500	3.36462e-07	1.77581e-10	KDM4A	HK1_TE:1320;HK1_TE:1321;HK1_TE:1322;HK1_TE:1323;HK1_TE:1324;HK1_TE:1325	1	6
1	right	44127500	44502500	3.36462e-07	1.77581e-10	SLC6A9;RP5-1198O20.4	HK1_TE:1306;HK1_TE:1307;HK1_TE:1308	2	3
1	right	44135000	44400000	9.08604e-09	0.000100568	ARTN;RP11-7O11.3;IPO13	HK1_TE:1306;HK1_TE:1307;HK1_TE:1308	3	3
1	right	44412500	44452500	0.000805646	0.000868542	ATP6V0B;B4GALT2;CCDC24	HK1_TE:1319	3	1
1	left	44495000	44795000	0.000370267	9.62415e-06	SLC6A9;RP5-1198O20.4	HK1_TE:1328;HK1_TE:1329	2	2
1	right	44495000	44795000	0.000370267	9.62415e-06	AL390776.1	HK1_TE:1320;HK1_TE:1321;HK1_TE:1322;HK1_TE:1323;HK1_TE:1324	1	5
1	right	45097500	45140000	3.79764e-06	3.58794e-06	TMEM53;C1orf228	HK1_TE:1337	2	1
1	right	45202500	45242500	8.37638e-06	3.69574e-08	RP11-269F19.2;RPS8;SNORD55;SNORD46;SNORD38A;SNORD38B;RPS15AP11;BEST4	HK1_TE:1339;HK1_TE:1340;HK1_TE:1341	8	3
1	right	45262500	45477500	3.36462e-07	7.68971e-09	HECTD3;UROD	HK1_TE:1342	2	1
1	right	45975000	46155000	1.9161e-05	1.78491e-05	GPBP1L1;TMEM69;RP11-767N6.7	HK1_TE:1351;HK1_TE:1352	3	2
1	left	46807500	46987500	0.000394877	0.000365355	NSUN4	HK1_TE:1365;HK1_TE:1366	1	2
1	right	47080000	47132500	0.000366955	0.0067623	ATPAF1;RP11-8J9.1;TEX38;EFCAB14-AS1	HK1_TE:1367;HK1_TE:1368	4	2
1	left	48575000	48670000	1.98031e-08	1.89818e-08	AL109659.1	HK1_TE:1383	1	1
1	right	51435000	51655000	1.68397e-06	1.49388e-06	AL162430.2;AL162430.1	HK1_TE:1398	2	1
1	left	52030000	52085000	2.76276e-07	3.12558e-07	OSBPL9	HK1_TE:1420	1	1
1	left	52349166	52517500	7.54431e-07	2.58117e-05	NRD1	HK1_TE:1434;HK1_TE:1435	1	2
1	right	52349166	52517500	7.54431e-07	2.58117e-05	TXNDC12;TXNDC12-AS1;BTF3L4	HK1_TE:1430	3	1
1	right	52522500	52832500	0.00354321	0.000312848	CC2D1B;RP11-155O18.6;PLA2G12AP1	HK1_TE:1434;HK1_TE:1435	3	2
1	left	53165000	53325000	0.00355792	5.26111e-05	SELRC1;NDUFS5P3	HK1_TE:1439;HK1_TE:1440	2	2
1	left	53165000	53295000	0.000131781	1.04217e-06	SELRC1;NDUFS5P3	HK1_TE:1438	2	1
1	left	53795000	54415000	0.00129866	0.00283575	LRP8;RP4-784A16.5	HK1_TE:1446;HK1_TE:1447;HK1_TE:1448;HK1_TE:1449;HK1_TE:1450	2	5
1	left	54302500	54407500	2.61502e-05	0.00740321	NDC1;AL049745.1;RP4-654H19.2	HK1_TE:1446;HK1_TE:1447;HK1_TE:1448;HK1_TE:1449	3	4
1	right	54955000	55007500	0.0247356	0.0269174	HNRNPA1P63;ACOT11	HK1_TE:1457	2	1
1	right	55007500	55182500	4.83983e-06	4.43263e-06	TTC4	HK1_TE:1458	1	1
1	left	59045000	59615000	0.000202021	0.00249342	RN7SL713P;TACSTD2	HK1_TE:1567;HK1_TE:1568;HK1_TE:1569;HK1_TE:1570;HK1_TE:1571	2	5
1	left	59042500	59247500	4.83983e-06	2.45665e-07	RN7SL713P;TACSTD2	HK1_TE:1541;HK1_TE:1542	2	2
1	right	59042500	59247500	4.83983e-06	2.45665e-07	JUN;RP4-794H19.2	HK1_TE:1523;HK1_TE:1524;HK1_TE:1525;HK1_TE:1526;HK1_TE:1527	2	5
1	left	59200000	60175000	2.2538e-18	0.000126813	Y_RNA	HK1_TE:1588	1	1
1	right	59206250	59245000	4.37449e-06	4.99934e-08	AL136985.1;JUN;RP4-794H19.2	HK1_TE:1535;HK1_TE:1536;HK1_TE:1537;HK1_TE:1538;HK1_TE:1539	3	5
1	left	59247500	59612500	2.95586e-11	2.67482e-11	JUN;RP4-794H19.2	HK1_TE:1567;HK1_TE:1568;HK1_TE:1569;HK1_TE:1570;HK1_TE:1571	2	5
1	left	59252500	59347500	0.00016076	0.000172498	JUN;RP4-794H19.2	HK1_TE:1553;HK1_TE:1554	2	2
1	right	59252500	59347500	0.00016076	0.000172498	RP4-794H19.1	HK1_TE:1541;HK1_TE:1542	1	2
1	left	59252500	60225000	0.00107522	0.000141293	JUN;RP4-794H19.2	HK1_TE:1592;HK1_TE:1593	2	2
1	right	59252500	60225000	0.00107522	0.000141293	RP4-782L23.1	HK1_TE:1541;HK1_TE:1542	1	2
1	left	59285000	59485000	2.69456e-08	1.71666e-05	RP11-63G10.3	HK1_TE:1564;HK1_TE:1565	1	2
1	right	59285000	59485000	2.69456e-08	1.71666e-05	RP4-794H19.4	HK1_TE:1543;HK1_TE:1544;HK1_TE:1545;HK1_TE:1546	1	4
1	left	59282500	59370000	4.37449e-06	4.71409e-06	RP11-63G10.3	HK1_TE:1555;HK1_TE:1556;HK1_TE:1557;HK1_TE:1562	1	4
1	right	59282500	59370000	4.37449e-06	4.71409e-06	RP4-794H19.1	HK1_TE:1543;HK1_TE:1544;HK1_TE:1545;HK1_TE:1546	1	4
1	left	59304166	59362500	0.000462426	3.58794e-06	RP11-63G10.2	HK1_TE:1553;HK1_TE:1554;HK1_TE:1555;HK1_TE:1556;HK1_TE:1557;HK1_TE:1562	1	6
1	right	59304166	59362500	0.000462426	3.58794e-06	RP4-794H19.1	HK1_TE:1545;HK1_TE:1546;HK1_TE:1547;HK1_TE:1548;HK1_TE:1549;HK1_TE:1550;HK1_TE:1551;HK1_TE:1552	1	8
1	left	59347500	59607500	0.000328442	0.000312848	RP4-794H19.1	HK1_TE:1567;HK1_TE:1568;HK1_TE:1569;HK1_TE:1570	1	4
1	left	59485000	59615000	0.000471635	0.000502906	RP4-794H19.4	HK1_TE:1567;HK1_TE:1568;HK1_TE:1569;HK1_TE:1570;HK1_TE:1571	1	5
1	left	59762500	60150000	6.47311e-14	3.39681e-08	RP11-467C18.1;FGGY	HK1_TE:1584;HK1_TE:1585;HK1_TE:1586;HK1_TE:1587	2	4
1	left	59765000	60225000	0.00262112	0.00248955	RP11-467C18.1;FGGY	HK1_TE:1592;HK1_TE:1593	2	2
1	right	61525000	62312500	4.92042e-06	7.20829e-06	RNU6-1177P	HK1_TE:1601;HK1_TE:1602	1	2
1	left	62547500	62597500	0.000258212	0.000236297	RN7SL180P;MIR3116-1	HK1_TE:1626	2	1
1	right	64737500	65450000	0.000346893	5.16244e-06	SLC2A3P2	HK1_TE:1655;HK1_TE:1656;HK1_TE:1657;HK1_TE:1658;HK1_TE:1659;HK1_TE:1660	1	6
1	left	65542500	65612500	0.0247356	0.0269174	RP4-535B20.1;RP4-535B20.2	HK1_TE:1675	2	1
1	right	65542500	65612500	0.0247356	0.0269174	AK4;RP4-700A9.1	HK1_TE:1674	2	1
1	right	65645000	65715000	0.00156985	0.00168856	DNAJC6	HK1_TE:1676;HK1_TE:1677;HK1_TE:1678;HK1_TE:1679;HK1_TE:1680	1	5
1	left	65887500	67387500	1.72091e-05	0.00130914	RNU2-15P;LEPR;LEPROT	HK1_TE:1708;HK1_TE:1709	3	2
1	right	65887500	67387500	1.72091e-05	0.00130914	WDR78;MIER1	HK1_TE:1689;HK1_TE:1690	2	2
1	right	67045000	67395000	0.000773838	0.000742353	WDR78;MIER1	HK1_TE:1699;HK1_TE:1700;HK1_TE:1701;HK1_TE:1702;HK1_TE:1703;HK1_TE:1704;HK1_TE:1705	2	7
1	left	68033500	68150000	1.69975e-31	2.86684e-25	RP11-393N21.1	HK1_TE:1742;HK1_TE:1743;HK1_TE:1744;HK1_TE:1745	1	4
1	right	68033500	68150000	1.69975e-31	2.86684e-25	GADD45A	HK1_TE:1732;HK1_TE:1733;HK1_TE:1734;HK1_TE:1735;HK1_TE:1736;HK1_TE:1737	1	6
1	left	68232500	68317500	0.000106711	4.98605e-06	RNU7-80P	HK1_TE:1762	1	1
1	left	68695000	68845000	0.000121884	0.000119115	WLS;RPS7P4	HK1_TE:1781;HK1_TE:1782;HK1_TE:1783;HK1_TE:1784	2	4
1	right	68695000	68845000	0.000121884	0.000119115	TCEB1P18;RP5-1033K19.2	HK1_TE:1773;HK1_TE:1774;HK1_TE:1775;HK1_TE:1776;HK1_TE:1777;HK1_TE:1778;HK1_TE:1779;HK1_TE:1780	2	8
1	right	70822500	70877500	2.66526e-09	6.60691e-07	CTH	HK1_TE:1812;HK1_TE:1813	1	2
1	right	76137500	76192500	2.69181e-06	2.60856e-06	RP4-682C21.5;ACADM	HK1_TE:1824;HK1_TE:1825;HK1_TE:1826;HK1_TE:1827	2	4
1	right	78292500	78362500	2.61502e-05	0.000569427	NEXN-AS1;NEXN	HK1_TE:1848	2	1
1	left	78442500	78577500	7.40721e-08	8.05617e-13	FUBP1;DNAJB4;GIPC2	HK1_TE:1854;HK1_TE:1855;HK1_TE:1856	3	3
1	left	78767500	78807500	1.47558e-08	1.48427e-08	PTGFR	HK1_TE:1860;HK1_TE:1861	1	2
1	left	79084166	79139166	0.00125972	7.54171e-05	IFI44L	HK1_TE:1862	1	1
1	left	79507500	79655000	0.00145157	0.000100568	PSAT1P3	HK1_TE:1874;HK1_TE:1875	1	2
1	right	84615000	84765000	0.000129497	0.000137358	SAMD13	HK1_TE:1916;HK1_TE:1917	1	2
1	left	84972500	85217500	1.18608e-12	3.01651e-10	GNG5;SPATA1	HK1_TE:1933;HK1_TE:1934;HK1_TE:1935	2	3
1	left	85095000	85217500	4.27631e-06	4.44343e-06	C1orf180;RP11-484D4.3	HK1_TE:1933;HK1_TE:1934;HK1_TE:1935	2	3
1	left	85160000	85195000	0.000106518	0.00359558	SSX2IP	HK1_TE:1931;HK1_TE:1932	1	2
1	right	85312500	85737500	5.11506e-06	7.29866e-10	C1orf52;Y_RNA;BCL10;RP11-131L23.1;AL590113.1	HK1_TE:1939;HK1_TE:1940;HK1_TE:1941;HK1_TE:1942;HK1_TE:1943;HK1_TE:1944;HK1_TE:1945;HK1_TE:1946;HK1_TE:1947;HK1_TE:1948;HK1_TE:1949;HK1_TE:1950;HK1_TE:1951	5	13
1	right	85312500	86050000	0.000342592	0.000553832	DDAH1;RP11-290M5.4;CYR61;SNORD81;RP11-290M5.2	HK1_TE:1939;HK1_TE:1940;HK1_TE:1941;HK1_TE:1942;HK1_TE:1943;HK1_TE:1944;HK1_TE:1945;HK1_TE:1946;HK1_TE:1947;HK1_TE:1948;HK1_TE:1949;HK1_TE:1950;HK1_TE:1951	5	13
1	right	85985000	145715000	1.14188e-07	3.4585e-08	CD160;PDZK1	HK1_TE:1960	2	1
1	left	86847500	86892500	2.61502e-05	2.58117e-05	ODF2L	HK1_TE:1983;HK1_TE:1984;HK1_TE:1985	1	3
1	left	86856250	87168750	1.19563e-23	3.23031e-16	ODF2L;RP11-444C12.1	HK1_TE:1993	2	1
1	left	86885000	86967500	0.0156625	0.0160059	RP11-444C12.1;CLCA2	HK1_TE:1986;HK1_TE:1987	2	2
1	right	86987500	87162500	3.2011e-05	3.16339e-05	RP4-651E10.4;RP4-612B15.3;SH3GLB1	HK1_TE:1987;HK1_TE:1988	3	2
1	left	89458750	89928750	0.000258212	1.89137e-05	CCBL2;RBMXL1	HK1_TE:2021;HK1_TE:2022	2	2
1	left	89457500	90097500	0.000148601	0.00103268	CCBL2;RBMXL1	HK1_TE:2023;HK1_TE:2024	2	2
1	right	89457500	90097500	0.000148601	0.00103268	RP5-1007M22.2;RP11-413E1.4;LRRC8C;RP11-302M6.4	HK1_TE:2015;HK1_TE:2016	4	2
1	left	89830000	89920000	0.0097349	0.00948442	GBP6	HK1_TE:2021;HK1_TE:2022	1	2
1	right	90355000	90415000	4.00414e-06	4.26441e-06	RP11-302M6.5	HK1_TE:2034;HK1_TE:2035;HK1_TE:2036;HK1_TE:2037	1	4
1	right	92787500	93262500	0.000342017	0.00037574	EVI5	HK1_TE:2057;HK1_TE:2058;HK1_TE:2059;HK1_TE:2060	1	4
1	left	92955000	93065000	1.04148e-05	9.32258e-06	GFI1	HK1_TE:2062;HK1_TE:2063	1	2
1	left	93320833	93427500	1.27911e-09	1.20577e-09	SNORA66;SNORA51	HK1_TE:2072;HK1_TE:2073	2	2
1	right	93320833	93427500	1.27911e-09	1.20577e-09	FAM69A;RNU6-970P;RN7SL692P	HK1_TE:2067	3	1
1	left	93647500	93685000	0.00190502	0.0286881	TMED5;CCDC18;RP4-612C19.1	HK1_TE:2077;HK1_TE:2078	3	2
1	right	93800000	94312500	1.71407e-20	9.75485e-10	BCAR3;MIR760;RP4-561L24.3	HK1_TE:2081;HK1_TE:2082;HK1_TE:2083;HK1_TE:2084;HK1_TE:2085	3	5
1	right	93910833	94314166	1.38742e-17	6.51399e-15	BCAR3;MIR760;RP4-561L24.3	HK1_TE:2091;HK1_TE:2092;HK1_TE:2093	3	3
1	left	94237500	94277500	0.000228491	0.000230896	RP11-488P3.1	HK1_TE:2128;HK1_TE:2129;HK1_TE:2130;HK1_TE:2131;HK1_TE:2132;HK1_TE:2133;HK1_TE:2134	1	7
1	left	94362500	94662500	0.0034419	3.3234e-09	GCLM	HK1_TE:2144	1	1
1	right	94695000	94885000	2.23037e-06	0.00013487	RP11-366L18.1;ABCD3	HK1_TE:2145;HK1_TE:2146	2	2
1	left	94997500	95268214	3.73179e-21	2.07585e-14	F3	HK1_TE:2172;HK1_TE:2173;HK1_TE:2174;HK1_TE:2175;HK1_TE:2176;HK1_TE:2177;HK1_TE:2178	1	7
1	left	95125000	95260000	5.56385e-06	4.98605e-06	KATNBL1P2;PGBD4P7	HK1_TE:2172;HK1_TE:2173;HK1_TE:2174;HK1_TE:2175;HK1_TE:2176;HK1_TE:2177;HK1_TE:2178	2	7
1	left	95198333	95255000	0.000217035	2.46048e-07	MIR378G	HK1_TE:2172;HK1_TE:2173;HK1_TE:2174;HK1_TE:2175;HK1_TE:2176;HK1_TE:2177;HK1_TE:2178	1	7
1	right	97437500	98512500	0.000161705	1.05508e-06	MIR137HG	HK1_TE:2218	1	1
1	left	98390000	98502500	3.14665e-13	3.06818e-13	DPYD	HK1_TE:2248;HK1_TE:2249;HK1_TE:2250;HK1_TE:2251;HK1_TE:2252;HK1_TE:2253;HK1_TE:2254	1	7
1	right	98390000	98502500	3.14665e-13	3.06818e-13	MIR137HG	HK1_TE:2242;HK1_TE:2243;HK1_TE:2244	1	3
1	left	99137500	99387500	7.81068e-06	0.00375151	SNX7	HK1_TE:2276;HK1_TE:2277;HK1_TE:2278	1	3
1	left	99127500	99205000	0.0247356	0.0269174	SNX7	HK1_TE:2275	1	1
1	right	100045000	100120000	2.02754e-06	0.00106151	PALMD	HK1_TE:2281;HK1_TE:2282	1	2
1	left	100315000	100505000	3.53965e-07	0.000193614	RP4-581O6.1;AGL	HK1_TE:2298;HK1_TE:2299	2	2
1	left	100437500	100502500	0.000220834	0.000230206	RP5-884G6.2;SLC35A3;RNU6-750P	HK1_TE:2298;HK1_TE:2299	3	2
1	right	100437500	100502500	0.000220834	0.000230206	RP4-714D9.5;HIAT1	HK1_TE:2296;HK1_TE:2297	2	2
1	left	101495000	101715000	1.41636e-07	0.00193308	DPH5;RP11-421L21.3	HK1_TE:2302;HK1_TE:2303;HK1_TE:2304;HK1_TE:2305	2	4
1	right	109240500	109290500	1.56707e-06	1.64114e-06	RP11-293A10.3;STXBP3	HK1_TE:2329	2	1
1	left	109425000	109745000	0.00476301	0.00478898	GPSM2	HK1_TE:2342;HK1_TE:2343	1	2
1	right	109425000	109745000	0.00476301	0.00478898	RNU7-122P;SARS	HK1_TE:2335;HK1_TE:2336	2	2
1	left	109505000	109582500	2.61502e-05	2.58117e-05	AKNAD1;CLCC1	HK1_TE:2337;HK1_TE:2338	2	2
1	right	109745000	109945000	4.72113e-08	4.06787e-08	SORT1	HK1_TE:2342;HK1_TE:2343	1	2
1	left	110039166	110075833	4.95717e-09	4.66247e-09	ATXN7L2;CYB561D1;AMIGO1	HK1_TE:2347	3	1
1	left	111062500	111312500	4.42234e-08	4.82846e-08	KCNA10	HK1_TE:2364;HK1_TE:2365	1	2
1	right	112041666	112288333	1.47335e-09	5.73174e-07	FAM212B;RP4-773A18.4;DDX20	HK1_TE:2368	3	1
1	right	112052500	112197500	1.11544e-17	9.7797e-18	KRT18P57;RNU6-151P	HK1_TE:2368	2	1
1	right	112052500	112087500	0.0035246	0.00376037	RAP1A	HK1_TE:2368	1	1
1	right	112080000	112165000	1.58201e-07	0.000324021	RP5-836N10.1	HK1_TE:2369;HK1_TE:2370;HK1_TE:2371;HK1_TE:2372	1	4
1	left	112935000	113215000	2.70137e-12	1.4348e-16	CTTNBP2NL	HK1_TE:2405;HK1_TE:2406;HK1_TE:2409	1	3
1	right	112935000	113215000	2.70137e-12	1.4348e-16	MOV10	HK1_TE:2381	1	1
1	right	112933750	113007500	6.61137e-12	6.42055e-12	WNT2B	HK1_TE:2381	1	1
1	right	113042500	113160000	1.28573e-08	1.36649e-08	ST7L;CAPZA1;MRPL53P1	HK1_TE:2382	3	1
1	right	113042500	113252500	0.00107522	0.000141293	RP11-426L16.3;RHOC;RP11-426L16.10;PPM1J;RP11-426L16.9;FAM19A3	HK1_TE:2382	6	1
1	left	113162500	113217500	0.00111026	0.0010752	ST7L;CAPZA1;MRPL53P1;RNU7-70P	HK1_TE:2405;HK1_TE:2406;HK1_TE:2409	4	3
1	right	113162500	113217500	0.00111026	0.0010752	MOV10	HK1_TE:2396;HK1_TE:2397;HK1_TE:2398;HK1_TE:2399;HK1_TE:2400;HK1_TE:2401	1	6
1	left	113422500	113587500	2.98768e-10	1.42721e-08	RP3-522D1.2	HK1_TE:2429;HK1_TE:2430;HK1_TE:2431	1	3
1	left	113497500	113617500	2.66526e-09	2.87413e-09	SLC16A1;RP11-31F15.1	HK1_TE:2432;HK1_TE:2433	2	2
1	left	113499166	113580833	1.46905e-06	7.43645e-05	SLC16A1;RP11-31F15.1	HK1_TE:2429;HK1_TE:2430;HK1_TE:2431	2	3
1	right	113685000	113995000	0.000147027	0.00013487	RP11-512F24.1	HK1_TE:2434;HK1_TE:2435	1	2
1	right	115687500	116312500	8.48609e-08	1.08508e-07	CASQ2	HK1_TE:2487;HK1_TE:2488;HK1_TE:2489;HK1_TE:2490;HK1_TE:2491;HK1_TE:2492;HK1_TE:2493;HK1_TE:2494	1	8
1	right	115681666	115871666	5.38407e-05	7.05863e-08	NGF	HK1_TE:2487;HK1_TE:2488;HK1_TE:2489;HK1_TE:2490;HK1_TE:2491;HK1_TE:2492	1	6
1	left	115875000	116015000	0.000509931	0.000505776	NGF	HK1_TE:2525	1	1
1	right	115875000	116015000	0.000509931	0.000505776	RP4-663N10.2;AL512638.1	HK1_TE:2518;HK1_TE:2519;HK1_TE:2520	2	3
1	left	116012500	116087500	1.21592e-05	1.26465e-05	RP4-663N10.2	HK1_TE:2529	1	1
1	right	116012500	116087500	1.21592e-05	1.26465e-05	TCEB1P20	HK1_TE:2525	1	1
1	left	116012500	116137500	2.10182e-05	1.9163e-05	RP4-663N10.2	HK1_TE:2531	1	1
1	right	116012500	116137500	2.10182e-05	1.9163e-05	RN7SL420P	HK1_TE:2525	1	1
1	left	116037500	116087500	4.27631e-06	0.000172498	AL512638.1	HK1_TE:2529	1	1
1	right	116037500	116087500	4.27631e-06	0.000172498	TCEB1P20	HK1_TE:2526;HK1_TE:2527;HK1_TE:2528	1	3
1	left	116089166	116139166	8.7073e-05	9.07266e-05	TCEB1P20	HK1_TE:2531	1	1
1	right	116089166	116139166	8.7073e-05	9.07266e-05	RN7SL420P	HK1_TE:2529	1	1
1	right	116682500	117034166	8.06088e-12	6.28942e-14	RP4-655J12.4;RP5-1086K13.1	HK1_TE:2547;HK1_TE:2548;HK1_TE:2549	2	3
1	left	117115000	117225000	2.04536e-08	0.000266445	CD58;MIR548AC	HK1_TE:2564;HK1_TE:2565;HK1_TE:2566	2	3
1	right	117115000	117225000	2.04536e-08	0.000266445	IGSF3;MIR320B1;C1orf137	HK1_TE:2559	3	1
1	left	117115000	117355000	0.00196638	0.00196099	CD58;MIR548AC	HK1_TE:2569;HK1_TE:2570	2	2
1	right	117275000	117602500	0.000258212	1.89137e-05	RP11-27K13.3;TTF2	HK1_TE:2567;HK1_TE:2568	2	2
1	right	117422500	117532500	1.99973e-07	8.4562e-06	CD101	HK1_TE:2573;HK1_TE:2574	1	2
1	right	117535000	117600000	0.0130661	0.000106588	RP11-27K13.3;TTF2	HK1_TE:2576;HK1_TE:2577	2	2
1	left	117612500	117667500	0.000543794	2.58117e-05	RP11-27K13.3;TTF2	HK1_TE:2579	2	1
1	right	117612500	117667500	0.000543794	2.58117e-05	TRIM45;RPS15AP9	HK1_TE:2578	2	1
1	right	117675000	117825000	2.32497e-05	2.10805e-05	RP11-39H13.1	HK1_TE:2580;HK1_TE:2581	1	2
1	left	117912500	118462500	0.00104779	0.00117732	RP11-188D8.1;MAN1A2	HK1_TE:2595	2	1
1	right	117912500	118462500	0.00104779	0.00117732	GDAP2;WDR3	HK1_TE:2583;HK1_TE:2584	2	2
1	left	119682500	119822500	2.25796e-10	1.77581e-10	WARS2;RPS3AP12;RP11-418J17.1	HK1_TE:2614;HK1_TE:2615;HK1_TE:2616	3	3
1	right	144917500	145062500	3.83573e-06	0.000294535	PDE4DIP	HK1_TE:2689;HK1_TE:2690;HK1_TE:2691	1	3
1	right	144925000	145007500	3.55015e-25	1.51313e-11	RP11-326G21.1	HK1_TE:2690;HK1_TE:2691	1	2
1	left	145397500	145437500	4.49396e-06	0.00111423	RNVU1-6	HK1_TE:2723;HK1_TE:2724;HK1_TE:2725	1	3
1	right	145397500	145437500	4.49396e-06	0.00111423	TXNIP	HK1_TE:2720;HK1_TE:2721;HK1_TE:2722	1	3
1	right	145422500	145590000	7.53704e-05	4.43263e-06	PIAS3;NUDT17	HK1_TE:2723	2	1
1	left	145430000	145542500	1.56707e-06	0.000149481	TXNIP	HK1_TE:2728;HK1_TE:2729	1	2
1	right	145430000	145542500	1.56707e-06	0.000149481	RP11-315I20.3;ANKRD35	HK1_TE:2723	2	1
1	right	145437500	145512500	0.000154959	0.00724467	RP11-315I20.1;RBM8A;GNRHR2;PEX11B;ITGA10	HK1_TE:2723;HK1_TE:2724;HK1_TE:2725	5	3
1	right	145542500	145577500	7.0251e-05	7.63019e-05	PIAS3;NUDT17	HK1_TE:2728;HK1_TE:2729	2	2
1	right	146737500	146962500	0.00813407	3.08548e-05	OR13Z3P	HK1_TE:2764	1	1
1	left	147017500	147072500	3.33902e-05	0.000572385	BCL9	HK1_TE:2766;HK1_TE:2767	1	2
1	left	149870833	149910833	1.68745e-06	1.58805e-06	HIST2H2BE;HIST2H2AC;HIST2H2AB;BOLA1	HK1_TE:2829	4	1
1	left	150044375	150144375	6.06004e-17	9.08478e-14	VPS45	HK1_TE:2839;HK1_TE:2840	1	2
1	left	150207500	150242500	3.81612e-07	3.63368e-07	ANP32E;RNU2-17P	HK1_TE:2842	2	1
1	left	150337500	150487500	1.27911e-09	1.59886e-07	RPRD2	HK1_TE:2849	1	1
1	left	150462500	151162500	0.00449965	0.00612676	TARS2	HK1_TE:2871;HK1_TE:2872	1	2
1	right	150462500	151162500	0.00449965	0.00612676	TMOD4;VPS72;PIP5K1A	HK1_TE:2844;HK1_TE:2845;HK1_TE:2846;HK1_TE:2847;HK1_TE:2848	3	5
1	left	150455000	150600000	0.000143315	0.00366416	TARS2	HK1_TE:2859;HK1_TE:2860;HK1_TE:2861;HK1_TE:2862	1	4
1	right	150455000	150600000	0.000143315	0.00366416	ENSA	HK1_TE:2843;HK1_TE:2844;HK1_TE:2845;HK1_TE:2846;HK1_TE:2847;HK1_TE:2848	1	6
1	left	150487500	150527500	3.79764e-06	3.58794e-06	ECM1;LINC00568	HK1_TE:2852;HK1_TE:2853;HK1_TE:2854;HK1_TE:2855	2	4
1	right	150487500	150527500	3.79764e-06	3.58794e-06	RP11-54A4.2;ADAMTSL4;AL356356.1;MIR4257;ADAMTSL4-AS1;RN7SL473P;RN7SL600P	HK1_TE:2849	7	1
1	right	150535000	150895000	5.97259e-05	5.42466e-05	SETDB1	HK1_TE:2852;HK1_TE:2853;HK1_TE:2854;HK1_TE:2855	1	4
1	left	150532500	150952500	3.35658e-05	0.000290788	RP11-54A4.2;ADAMTSL4;AL356356.1;MIR4257;ADAMTSL4-AS1;RN7SL473P;RN7SL600P	HK1_TE:2868	7	1
1	right	150532500	150952500	3.35658e-05	0.000290788	CERS2;RP11-316M1.12;RP11-316M1.3;ANXA9	HK1_TE:2852;HK1_TE:2853;HK1_TE:2854;HK1_TE:2855	4	4
1	left	150545833	150594166	2.13925e-08	2.04809e-08	ADAMTSL4-AS1;RN7SL473P;RN7SL600P;MCL1	HK1_TE:2857;HK1_TE:2858;HK1_TE:2859;HK1_TE:2860;HK1_TE:2861;HK1_TE:2862	4	6
1	right	150545833	150594166	2.13925e-08	2.04809e-08	ENSA	HK1_TE:2852;HK1_TE:2853;HK1_TE:2854;HK1_TE:2855	1	4
1	left	150897500	150952500	4.85931e-05	4.93114e-05	SETDB1	HK1_TE:2868	1	1
1	left	150982500	151037500	0.000154959	1.64114e-06	FAM63A;PRUNE;RNU6-884P	HK1_TE:2869;HK1_TE:2870	3	2
1	left	151132500	151167500	0.00429446	7.39759e-05	SEMA6C;TNFAIP8L2;SCNM1;LYSMD1	HK1_TE:2871;HK1_TE:2872	4	2
1	left	151170000	151965000	0.000741866	9.00978e-05	VPS72;PIP5K1A	HK1_TE:2904;HK1_TE:2905;HK1_TE:2906;HK1_TE:2907;HK1_TE:2908;HK1_TE:2909	2	6
1	right	151170000	151965000	0.000741866	9.00978e-05	S100A10;NBPF18P	HK1_TE:2871;HK1_TE:2872	2	2
1	right	151165500	151224500	4.73512e-07	5.15085e-07	PSMD4	HK1_TE:2871;HK1_TE:2872	1	2
1	right	151272500	151317500	1.86018e-12	2.01807e-12	RFX5;RP11-126K1.8;RP11-126K1.6	HK1_TE:2873	3	1
1	left	151432500	151507500	2.86262e-05	3.05713e-05	POGZ	HK1_TE:2877;HK1_TE:2878	1	2
1	left	151512500	151962500	7.26734e-07	6.91394e-07	SNORA44;TUFT1;RP11-74C1.4;MIR554	HK1_TE:2904;HK1_TE:2905;HK1_TE:2906;HK1_TE:2907;HK1_TE:2908;HK1_TE:2909	4	6
1	right	151512500	151962500	7.26734e-07	6.91394e-07	S100A10;NBPF18P	HK1_TE:2877;HK1_TE:2878	2	2
1	left	151514500	151557500	1.62876e-06	1.75779e-06	SNORA44;TUFT1;RP11-74C1.4;MIR554	HK1_TE:2879;HK1_TE:2880;HK1_TE:2881;HK1_TE:2882	4	4
1	left	151585000	151965000	3.25575e-05	0.000883286	RP11-404E16.1;SNX27	HK1_TE:2904;HK1_TE:2905;HK1_TE:2906;HK1_TE:2907;HK1_TE:2908;HK1_TE:2909	2	6
1	right	151585000	151965000	3.25575e-05	0.000883286	S100A10;NBPF18P	HK1_TE:2881;HK1_TE:2882;HK1_TE:2883;HK1_TE:2884;HK1_TE:2885	2	5
1	left	151582500	151652500	0.000154959	0.000149481	RP11-404E16.1;SNX27	HK1_TE:2887	2	1
1	left	151965000	153505000	0.000102578	0.00174042	S100A10;NBPF18P	HK1_TE:2980;HK1_TE:2981;HK1_TE:2982;HK1_TE:2983	2	4
1	right	151965000	153505000	0.000102578	0.00174042	BX470102.3;S100A6;S100A5	HK1_TE:2904;HK1_TE:2905;HK1_TE:2906;HK1_TE:2907;HK1_TE:2908;HK1_TE:2909	3	6
1	right	152112500	152320000	1.487e-06	0.000236297	FLG2	HK1_TE:2919;HK1_TE:2920;HK1_TE:2921	1	3
1	left	152317500	152432500	2.61502e-05	7.09813e-07	FLG2	HK1_TE:2953;HK1_TE:2954	1	2
1	left	152475000	152725000	0.00220589	0.0021394	LCE5A;CRCT1	HK1_TE:2963;HK1_TE:2964;HK1_TE:2965	2	3
1	right	152475000	152725000	0.00220589	0.0021394	RP1-43O17.2;KPRP	HK1_TE:2955;HK1_TE:2956;HK1_TE:2957;HK1_TE:2958;HK1_TE:2959;HK1_TE:2960;HK1_TE:2961;HK1_TE:2962	2	8
1	right	152927500	153005000	0.000106711	0.00146843	RP1-20N18.4;SPRR1B;SPRR2D	HK1_TE:2966	3	1
1	right	153490000	153605000	6.81953e-11	1.62791e-07	S100A13;RP1-178F15.5;S100A1;RP1-178F15.4;CHTOP	HK1_TE:2977;HK1_TE:2978;HK1_TE:2979;HK1_TE:2980;HK1_TE:2981;HK1_TE:2982;HK1_TE:2983	5	7
1	left	153505000	153935000	1.21038e-10	2.0072e-06	BX470102.3;S100A6;S100A5	HK1_TE:2993;HK1_TE:2994	3	2
1	right	153505000	153935000	1.21038e-10	2.0072e-06	CRTC2;SLC39A1;RP11-422P24.10;CREB3L4	HK1_TE:2980;HK1_TE:2981;HK1_TE:2982;HK1_TE:2983	4	4
1	right	153542916	153594583	6.89471e-22	7.26175e-22	S100A16;S100A14;S100A13;RP1-178F15.5;S100A1;RP1-178F15.4;CHTOP	HK1_TE:2984;HK1_TE:2985;HK1_TE:2986;HK1_TE:2987;HK1_TE:2988	7	5
1	right	153545000	153705000	0.00029126	0.000266445	RP11-216N14.1;Y_RNA;INTS3	HK1_TE:2984;HK1_TE:2985;HK1_TE:2986;HK1_TE:2987;HK1_TE:2988	3	5
1	left	153897500	153935000	4.73527e-15	2.18419e-11	GATAD2B	HK1_TE:2993;HK1_TE:2994	1	2
1	right	154162500	154387500	1.25734e-06	1.19788e-06	RP11-350G8.5;IL6R;RP11-350G8.7	HK1_TE:2998;HK1_TE:2999	3	2
1	left	154375000	154455000	8.7262e-13	1.10269e-08	RP11-350G8.5;IL6R;RP11-350G8.7	HK1_TE:3005;HK1_TE:3006;HK1_TE:3007;HK1_TE:3008;HK1_TE:3009	3	5
1	right	154375000	154455000	8.7262e-13	1.10269e-08	RP11-350G8.9	HK1_TE:3002	1	1
1	right	154377500	154527500	3.36462e-07	9.15597e-06	UBE2Q1;UBE2Q1-AS1;CHRNB2	HK1_TE:3002	3	1
1	left	154381500	154451500	3.49089e-08	3.69574e-08	RP11-350G8.5;IL6R;RP11-350G8.7	HK1_TE:3004;HK1_TE:3005;HK1_TE:3006;HK1_TE:3007;HK1_TE:3008;HK1_TE:3009	3	6
1	right	154454500	154524500	6.92731e-05	7.43645e-05	UBE2Q1;UBE2Q1-AS1	HK1_TE:3005;HK1_TE:3006;HK1_TE:3007;HK1_TE:3008;HK1_TE:3009	2	5
1	left	154535000	154901666	0.00515142	0.00013487	UBE2Q1;UBE2Q1-AS1;CHRNB2	HK1_TE:3011;HK1_TE:3012	3	2
1	left	154953125	155036250	1.76173e-10	2.36479e-07	SHC1;CKS1B;MIR4258;FLAD1;LENEP	HK1_TE:3020	5	1
1	left	154975000	155025000	1.84068e-07	0.00166261	LENEP;ZBTB7B	HK1_TE:3018;HK1_TE:3019	2	2
1	right	154975000	155025000	1.84068e-07	0.00166261	RP11-307C12.11;ADAM15;EFNA4;EFNA3;EFNA3	HK1_TE:3013	5	1
1	left	154972500	155057500	3.74169e-05	2.60004e-07	LENEP;ZBTB7B	HK1_TE:3020;HK1_TE:3021;HK1_TE:3022	2	3
1	left	154972500	155102500	7.20906e-10	4.6024e-08	LENEP;ZBTB7B	HK1_TE:3023	2	1
1	left	155103214	155148214	6.4405e-12	8.09106e-09	Y_RNA;EFNA1;SLC50A1;DPM3;RNU7-150P	HK1_TE:3024;HK1_TE:3025	5	2
1	right	155103214	155148214	6.4405e-12	8.09106e-09	KRTCAP2;RP11-201K10.3;TRIM46;MUC1	HK1_TE:3023	4	1
1	left	155177500	155285000	1.56416e-07	1.20577e-09	MUC1;MIR92B;THBS3;RP11-263K19.4;MTX1;RP11-263K19.6	HK1_TE:3026	6	1
1	left	155245000	156025000	1.15735e-05	0.000245233	SCAMP3;CLK2;HCN3	HK1_TE:3045;HK1_TE:3046	3	2
1	left	155295000	155620000	5.76224e-05	5.58451e-05	RUSC1-AS1;RUSC1	HK1_TE:3028;HK1_TE:3029	2	2
1	right	155295000	155620000	5.76224e-05	5.58451e-05	RP11-29H23.5	HK1_TE:3026	1	1
1	right	155725000	155827500	0.000477668	0.000480229	GON4L;RP11-101O6.2;SYT11	HK1_TE:3031;HK1_TE:3032;HK1_TE:3033;HK1_TE:3034	3	4
1	left	155865000	155902500	0.0014682	0.00154525	RNU4-19P	HK1_TE:3036;HK1_TE:3037;HK1_TE:3038	1	3
1	right	155865000	155902500	0.0014682	0.00154525	KIAA0907;SNORA42;SCARNA4;RXFP4	HK1_TE:3035	4	1
1	right	155887500	156275000	1.32751e-15	1.39313e-21	C1orf85;VHLL	HK1_TE:3036;HK1_TE:3037	2	2
1	left	155902500	155972500	8.46112e-09	6.79008e-12	KIAA0907;SNORA42;SCARNA4;RXFP4	HK1_TE:3044	4	1
1	right	155902500	155972500	8.46112e-09	6.79008e-12	ARHGEF2;RP11-336K24.5	HK1_TE:3036;HK1_TE:3037;HK1_TE:3038	2	3
1	left	155977500	156025000	9.19196e-06	9.50985e-06	ARHGEF2;SSR2	HK1_TE:3045;HK1_TE:3046	2	2
1	right	155977500	156025000	9.19196e-06	9.50985e-06	UBQLN4;LAMTOR2;RAB25	HK1_TE:3044	3	1
1	left	156058214	156188928	2.95586e-11	2.67482e-11	MEX3A;AL355388.1;LMNA	HK1_TE:3056;HK1_TE:3057	3	2
1	right	156058214	156188928	2.95586e-11	2.67482e-11	PMF1-BGLAP;PMF1	HK1_TE:3047;HK1_TE:3048;HK1_TE:3049;HK1_TE:3050;HK1_TE:3051;HK1_TE:3052;HK1_TE:3053;HK1_TE:3055	2	8
1	left	156354375	156412500	1.66506e-30	1.05461e-25	RP11-139I14.2	HK1_TE:3062	1	1
1	right	156354375	156412500	1.66506e-30	1.05461e-25	C1orf61;RP11-98G7.1	HK1_TE:3060;HK1_TE:3061	2	2
1	left	156472500	156867500	8.71216e-05	7.72895e-05	MEF2D;RP11-284F21.8	HK1_TE:3078	2	1
1	right	156632500	156730000	0.00203694	4.93114e-05	HDGF;PRCC	HK1_TE:3066;HK1_TE:3067	2	2
1	left	156655000	156850000	5.884e-05	0.00363907	NES;RP11-66D17.3	HK1_TE:3076;HK1_TE:3077	2	2
1	right	156655000	156850000	5.884e-05	0.00363907	PEAR1	HK1_TE:3068;HK1_TE:3069;HK1_TE:3070;HK1_TE:3071;HK1_TE:3072;HK1_TE:3073	1	6
1	right	156657500	156737500	1.56416e-07	1.22662e-05	HDGF	HK1_TE:3068;HK1_TE:3069;HK1_TE:3070;HK1_TE:3071;HK1_TE:3072;HK1_TE:3073	1	6
1	left	157987500	159887500	1.72091e-05	0.00130914	KIRREL-IT1	HK1_TE:3106;HK1_TE:3107;HK1_TE:3108;HK1_TE:3109;HK1_TE:3110;HK1_TE:3111;HK1_TE:3112	1	7
1	left	158125000	158962500	0.0386043	0.00037574	RP11-404O13.1	HK1_TE:3086	1	1
1	right	158125000	158962500	0.0386043	0.00037574	IFI16	HK1_TE:3081;HK1_TE:3082;HK1_TE:3083	1	3
1	left	158162500	159037500	2.49725e-05	2.88818e-05	ELL2P1;CD1D;RP11-404O13.4;RP11-404O13.5	HK1_TE:3088;HK1_TE:3089	4	2
1	right	158162500	159037500	2.49725e-05	2.88818e-05	AL359753.1;RP11-520H16.4	HK1_TE:3084	2	1
1	left	158969166	159050833	8.7073e-05	9.07266e-05	IFI16	HK1_TE:3090;HK1_TE:3091;HK1_TE:3092	1	3
1	right	158969166	159050833	8.7073e-05	9.07266e-05	RP11-520H16.4	HK1_TE:3086	1	1
1	left	159065000	159885000	1.67862e-05	1.68405e-05	RP11-520H16.4	HK1_TE:3106;HK1_TE:3107;HK1_TE:3108;HK1_TE:3109;HK1_TE:3110;HK1_TE:3111;HK1_TE:3112	1	7
1	right	159065000	159885000	1.67862e-05	1.68405e-05	AL590560.1;TAGLN2	HK1_TE:3090;HK1_TE:3091;HK1_TE:3092	2	3
1	left	159787500	159852500	2.43743e-07	1.26465e-05	SLAMF8	HK1_TE:3100;HK1_TE:3101;HK1_TE:3102;HK1_TE:3103;HK1_TE:3104;HK1_TE:3105	1	6
1	right	159787500	159852500	2.43743e-07	1.26465e-05	RP11-190A12.7	HK1_TE:3099	1	1
1	left	159817500	159852500	0.000543794	0.000569427	C1orf204;SNORD64;VSIG8	HK1_TE:3100;HK1_TE:3101;HK1_TE:3102;HK1_TE:3103;HK1_TE:3104;HK1_TE:3105	3	6
1	left	159887500	160987500	4.2973e-05	9.30278e-07	AL590560.1;TAGLN2	HK1_TE:3133;HK1_TE:3134	2	2
1	right	159887500	160987500	4.2973e-05	9.30278e-07	F11R	HK1_TE:3106;HK1_TE:3107;HK1_TE:3108;HK1_TE:3109;HK1_TE:3110;HK1_TE:3111;HK1_TE:3112	1	7
1	left	159917500	160067500	4.83983e-06	4.43263e-06	IGSF9;SLAMF9;RP11-48O20.4	HK1_TE:3113;HK1_TE:3114	3	2
1	left	160002500	160067500	0.000805646	3.44204e-05	RP11-226L15.1;RP11-226L15.5;PIGM	HK1_TE:3113;HK1_TE:3114	3	2
1	left	160070000	160222500	2.43743e-07	2.31256e-07	IGSF8	HK1_TE:3116	1	1
1	right	160070000	160222500	2.43743e-07	2.31256e-07	RP11-574F21.2;RP11-179G5.1	HK1_TE:3113;HK1_TE:3114	2	2
1	left	160170000	160227500	8.2875e-07	7.94644e-07	CASQ1;RP11-536C5.7;PEA15;AL121987.1	HK1_TE:3116	4	1
1	left	160315000	160380000	0.000996747	0.000998204	COPA;NCSTN	HK1_TE:3118	2	1
1	left	160701250	160800000	3.33902e-05	3.14579e-05	SLAMF7	HK1_TE:3126;HK1_TE:3127	1	2
1	left	160697500	160737500	0.000805646	3.44204e-05	SLAMF7	HK1_TE:3122;HK1_TE:3123	1	2
1	right	160965000	161060000	2.38787e-12	2.75184e-12	PVRL4;RP11-544M22.8;KLHDC9	HK1_TE:3130;HK1_TE:3131;HK1_TE:3132	3	3
1	right	160967500	161007500	1.14535e-05	1.22662e-05	F11R;RP11-544M22.3;TSTD1;USF1	HK1_TE:3130;HK1_TE:3131;HK1_TE:3132	4	3
1	left	161015000	161065000	3.98009e-15	3.26983e-09	F11R;RP11-544M22.3;TSTD1;USF1	HK1_TE:3136;HK1_TE:3137;HK1_TE:3138	4	3
1	right	161087500	161129166	0.000236193	0.000221404	UFC1;RP11-297K8.2;USP21;PPOX	HK1_TE:3139;HK1_TE:3140	4	2
1	right	161361666	161708333	0.000108308	0.00196099	RN7SL466P;DUSP12	HK1_TE:3146;HK1_TE:3147;HK1_TE:3148;HK1_TE:3149;HK1_TE:3150	2	5
1	left	161475000	161587500	1.0624e-07	1.16461e-07	FCGR2A;RP11-25K21.6	HK1_TE:3175;HK1_TE:3176;HK1_TE:3177;HK1_TE:3178	2	4
1	right	161500000	161700000	1.17913e-06	1.04217e-06	FCRLB;RN7SL466P	HK1_TE:3172;HK1_TE:3173;HK1_TE:3174	2	3
1	right	161592500	161707500	1.76179e-05	1.51788e-05	RN7SL466P;DUSP12	HK1_TE:3175;HK1_TE:3176;HK1_TE:3177;HK1_TE:3178	2	4
1	left	162042500	162107500	0.024362	0.00302692	NOS1AP	HK1_TE:3190;HK1_TE:3191;HK1_TE:3192;HK1_TE:3193;HK1_TE:3194	1	5
1	left	162465000	162665000	1.9161e-05	0.00076351	UHMK1	HK1_TE:3207;HK1_TE:3208;HK1_TE:3209	1	3
1	left	162470000	162507500	3.79764e-06	3.58794e-06	UHMK1	HK1_TE:3201;HK1_TE:3202;HK1_TE:3203;HK1_TE:3204;HK1_TE:3205	1	5
1	right	162470000	162507500	3.79764e-06	3.58794e-06	UQCRBP2	HK1_TE:3199;HK1_TE:3200	1	2
1	left	162472500	162555000	0.0125576	0.0136424	UHMK1	HK1_TE:3206	1	1
1	right	162472500	162555000	0.0125576	0.0136424	RP11-359K18.4	HK1_TE:3199;HK1_TE:3200	1	2
1	right	162497500	162535000	6.92731e-05	0.00191662	RP11-359K18.3;UAP1	HK1_TE:3201;HK1_TE:3202;HK1_TE:3203	2	3
1	right	162825000	163285000	2.46735e-11	6.42337e-07	RGS5;RP11-267N12.3	HK1_TE:3210;HK1_TE:3211	2	2
1	left	162845000	162950000	5.38407e-05	5.78509e-05	C1orf110	HK1_TE:3222;HK1_TE:3223	1	2
1	right	162845000	162950000	5.38407e-05	5.78509e-05	RP11-331H2.3	HK1_TE:3212;HK1_TE:3213	1	2
1	left	162838750	163142500	7.20906e-10	4.6024e-08	C1orf110	HK1_TE:3227;HK1_TE:3228	1	2
1	right	162838750	163142500	7.20906e-10	4.6024e-08	RP11-267N12.1	HK1_TE:3210;HK1_TE:3211;HK1_TE:3212;HK1_TE:3213	1	4
1	right	165085000	165555000	1.15735e-05	0.000245233	RP11-280O1.2;RP11-306I1.1;RP11-306I1.2	HK1_TE:3231	3	1
1	left	165667500	165737500	0.00190502	7.43645e-05	ALDH9A1;RP11-466F5.6;RP11-466F5.10	HK1_TE:3237	3	1
1	left	165689166	165884166	2.06874e-05	1.89137e-05	RP11-466F5.10	HK1_TE:3240;HK1_TE:3241;HK1_TE:3242;HK1_TE:3243;HK1_TE:3244	1	5
1	right	166455000	166575000	0.00130209	0.00122039	FMO9P	HK1_TE:3246	1	1
1	left	166837500	167187500	0.00217901	4.05354e-06	TADA1;DUTP6	HK1_TE:3255;HK1_TE:3256	2	2
1	right	168055000	168105000	2.36724e-07	2.46048e-07	GPR161	HK1_TE:3283	1	1
1	left	168197500	168292500	0.000571434	0.000572385	RP1-69E11.3;SFT2D2	HK1_TE:3293;HK1_TE:3294	2	2
1	left	168257500	168292500	0.00367096	0.00359558	TBX19	HK1_TE:3293;HK1_TE:3294	1	2
1	right	168315000	168545000	0.000202021	0.000245233	XCL1;RP4-738P11.4	HK1_TE:3295;HK1_TE:3296;HK1_TE:3297	2	3
1	right	168375000	168435000	0.000471635	0.000502906	QRSL1P1	HK1_TE:3298;HK1_TE:3299	1	2
1	right	168887500	169337500	0.00133069	0.00132712	NME7;BLZF1	HK1_TE:3303;HK1_TE:3304;HK1_TE:3305;HK1_TE:3306	2	4
1	right	168882500	169077500	0.0361605	0.00660905	RP5-1018K9.1;ATP1B1	HK1_TE:3303;HK1_TE:3304;HK1_TE:3305;HK1_TE:3306	2	4
1	right	169335000	169865000	0.000741866	0.000945802	SCYL3	HK1_TE:3317;HK1_TE:3318;HK1_TE:3319;HK1_TE:3320	1	4
1	left	169332500	169507500	0.00354321	0.000312848	NME7;BLZF1	HK1_TE:3322;HK1_TE:3323;HK1_TE:3324;HK1_TE:3325;HK1_TE:3326;HK1_TE:3327;HK1_TE:3328	2	7
1	left	170502500	170567500	0.00125972	0.00133372	RP11-576I22.2;GORAB	HK1_TE:3338	2	1
1	right	170502500	170567500	0.00125972	0.00133372	RP11-545I10.2;RP1-79C4.1	HK1_TE:3336	2	1
1	right	171217500	171282500	0.00808291	0.0083976	FMO4	HK1_TE:3346	1	1
1	left	171398333	171448333	2.13594e-05	2.20414e-05	RNU6-290P	HK1_TE:3355;HK1_TE:3356	1	2
1	right	171398333	171448333	2.13594e-05	2.20414e-05	snoU13;PRRC2C;RN7SL425P	HK1_TE:3349;HK1_TE:3350;HK1_TE:3351;HK1_TE:3352;HK1_TE:3353;HK1_TE:3354	3	6
1	left	172112500	172375000	8.34657e-19	1.74709e-10	MIR214;DNM3OS;MIR199A2	HK1_TE:3381;HK1_TE:3382;HK1_TE:3383;HK1_TE:3384;HK1_TE:3385;HK1_TE:3386	3	6
1	right	172112500	172375000	8.34657e-19	1.74709e-10	C1orf105	HK1_TE:3365	1	1
1	left	172390833	172692500	2.81287e-07	1.1006e-08	C1orf105	HK1_TE:3409;HK1_TE:3410	1	2
1	right	172432500	172502500	4.37449e-06	0.000230896	SUCO	HK1_TE:3387;HK1_TE:3388;HK1_TE:3389;HK1_TE:3390;HK1_TE:3391;HK1_TE:3392;HK1_TE:3393	1	7
1	left	172505000	172605000	0.00164495	0.00177051	SUCO	HK1_TE:3404;HK1_TE:3405;HK1_TE:3406;HK1_TE:3407;HK1_TE:3408	1	5
1	left	172712500	173387500	0.00652191	6.87237e-06	SLC25A38P1	HK1_TE:3438;HK1_TE:3439;HK1_TE:3440;HK1_TE:3441;HK1_TE:3442	1	5
1	right	172795000	173172500	1.38742e-17	6.51399e-15	TNFSF4	HK1_TE:3412;HK1_TE:3413	1	2
1	right	172805000	173020000	4.93523e-07	5.12654e-07	TNFSF18	HK1_TE:3412;HK1_TE:3413	1	2
1	right	172815500	172885500	0.00190502	0.00191662	RP3-471M13.2	HK1_TE:3413;HK1_TE:3414;HK1_TE:3415;HK1_TE:3416	1	4
1	left	172879000	173023000	1.64105e-10	1.21291e-06	RP3-471M13.2	HK1_TE:3420;HK1_TE:3421;HK1_TE:3422;HK1_TE:3423;HK1_TE:3424;HK1_TE:3425;HK1_TE:3426	1	7
1	right	173392500	173442500	0.000935164	0.000903509	RP11-296O14.3;PRDX6	HK1_TE:3438;HK1_TE:3439;HK1_TE:3440;HK1_TE:3441;HK1_TE:3442	2	5
1	right	174787500	174822500	7.73158e-08	0.00133372	NDUFAF4P4	HK1_TE:3468;HK1_TE:3469;HK1_TE:3470;HK1_TE:3471;HK1_TE:3472	1	5
1	right	174845000	174951666	4.91691e-09	8.36391e-06	RNU6-307P	HK1_TE:3476;HK1_TE:3477;HK1_TE:3478	1	3
1	right	175000000	175287500	1.03678e-07	0.000177581	RP3-518E13.2	HK1_TE:3489	1	1
1	left	177557500	177597500	0.000805646	0.000868542	RP1-35C21.2	HK1_TE:3508	1	1
1	right	177935000	178065000	0.0334508	0.0366353	RASAL2-AS1;RASAL2	HK1_TE:3512;HK1_TE:3513	2	2
1	right	178025000	178062500	0.0290919	0.0286881	RASAL2-AS1;RASAL2	HK1_TE:3516;HK1_TE:3517;HK1_TE:3518	2	3
1	left	178062500	178252500	1.21592e-05	2.31256e-07	RASAL2-AS1;RASAL2	HK1_TE:3556;HK1_TE:3557;HK1_TE:3558;HK1_TE:3559;HK1_TE:3560;HK1_TE:3561;HK1_TE:3562;HK1_TE:3563;HK1_TE:3564;HK1_TE:3565;HK1_TE:3566;HK1_TE:3567;HK1_TE:3568	2	13
1	left	178067500	178142500	0.00694757	0.057343	RASAL2-AS1;RASAL2	HK1_TE:3535;HK1_TE:3536;HK1_TE:3537	2	3
1	right	178285000	178435000	5.884e-05	5.26111e-05	RP4-593C16.3	HK1_TE:3571;HK1_TE:3572;HK1_TE:3573;HK1_TE:3574	1	4
1	right	178287500	178367500	0.00125972	0.00133372	RP4-765C7.2	HK1_TE:3571;HK1_TE:3572;HK1_TE:3573;HK1_TE:3574	1	4
1	right	178505000	179335000	0.002215	0.00249342	RN7SL374P;AXDND1	HK1_TE:3580;HK1_TE:3581;HK1_TE:3582;HK1_TE:3583;HK1_TE:3584;HK1_TE:3585	2	6
1	left	178510500	178706000	1.56707e-06	1.64114e-06	C1orf220;C1ORF220	HK1_TE:3604	2	1
1	right	178510500	178706000	1.56707e-06	1.64114e-06	RP11-428K3.1;RALGPS2;PTPN2P1	HK1_TE:3580;HK1_TE:3581;HK1_TE:3582;HK1_TE:3583;HK1_TE:3584;HK1_TE:3585	3	6
1	left	178507500	178580000	0.000366955	0.000394918	C1orf220;C1ORF220	HK1_TE:3587;HK1_TE:3588;HK1_TE:3589;HK1_TE:3590;HK1_TE:3591;HK1_TE:3592;HK1_TE:3593	2	7
1	left	178509166	178980833	0.000935164	6.83078e-05	C1orf220;C1ORF220	HK1_TE:3605;HK1_TE:3606	2	2
1	right	178509166	178980833	0.000935164	6.83078e-05	FAM20B	HK1_TE:3580;HK1_TE:3581;HK1_TE:3582;HK1_TE:3583;HK1_TE:3584;HK1_TE:3585	1	6
1	right	178580000	178697500	1.86018e-12	2.01807e-12	RP11-428K3.1;RALGPS2	HK1_TE:3587;HK1_TE:3588;HK1_TE:3589;HK1_TE:3590;HK1_TE:3591;HK1_TE:3592;HK1_TE:3593	2	7
1	right	178580000	178622500	0.000106518	0.000107722	RP5-1098D14.1	HK1_TE:3587;HK1_TE:3588;HK1_TE:3589;HK1_TE:3590;HK1_TE:3591;HK1_TE:3592;HK1_TE:3593	1	7
1	right	178582500	179112500	0.00153413	0.00154641	RP11-345I18.1	HK1_TE:3587;HK1_TE:3588;HK1_TE:3589;HK1_TE:3590;HK1_TE:3591;HK1_TE:3592;HK1_TE:3593	1	7
1	left	178655000	178697500	3.74169e-05	3.6184e-05	MIR4424	HK1_TE:3604	1	1
1	right	178655000	178697500	3.74169e-05	3.6184e-05	RP11-428K3.1;RALGPS2	HK1_TE:3599;HK1_TE:3600;HK1_TE:3601;HK1_TE:3602;HK1_TE:3603	2	5
1	right	179200000	179262500	7.55773e-05	0.00133372	SOAT1	HK1_TE:3629;HK1_TE:3630;HK1_TE:3631	1	3
1	left	179924500	180129500	7.51726e-11	1.48427e-08	RP11-533E19.2;RP11-533E19.5;CEP350;RP11-533E19.3	HK1_TE:3640;HK1_TE:3641;HK1_TE:3642;HK1_TE:3643;HK1_TE:3644	4	5
1	left	180495000	180550000	7.2682e-06	7.94376e-06	Y_RNA	HK1_TE:3657;HK1_TE:3658;HK1_TE:3659	1	3
1	right	180535000	180597500	0.00016076	0.000172498	XPR1	HK1_TE:3653;HK1_TE:3654;HK1_TE:3655;HK1_TE:3656;HK1_TE:3657	1	5
1	left	181003863	181120681	5.92631e-28	2.02342e-23	STX6;MR1	HK1_TE:3673;HK1_TE:3674	2	2
1	left	181003676	181054264	5.35286e-20	5.07149e-20	STX6;MR1	HK1_TE:3669;HK1_TE:3670;HK1_TE:3671;HK1_TE:3672	2	4
1	right	181003676	181054264	5.35286e-20	5.07149e-20	IER5;RP11-309G3.3	HK1_TE:3666;HK1_TE:3667;HK1_TE:3668	2	3
1	left	181045000	181295000	2.64376e-06	0.00106783	IER5	HK1_TE:3676	1	1
1	left	182152500	182187500	0.00364439	0.00365081	GS1-122H1.3	HK1_TE:3694	1	1
1	left	182815833	182855833	3.83573e-06	2.66548e-08	DHX9	HK1_TE:3703	1	1
1	right	182932500	183247500	3.33902e-05	3.14579e-05	RP11-548N1.1	HK1_TE:3704;HK1_TE:3705;HK1_TE:3706;HK1_TE:3707;HK1_TE:3708	1	5
1	left	182994166	183160833	0.00364439	0.00365081	LAMC1	HK1_TE:3728;HK1_TE:3729;HK1_TE:3730;HK1_TE:3731;HK1_TE:3732;HK1_TE:3733;HK1_TE:3734;HK1_TE:3735	1	8
1	right	182994166	183160833	0.00364439	0.00365081	LAMC2	HK1_TE:3711;HK1_TE:3712;HK1_TE:3713;HK1_TE:3714	1	4
1	left	182995000	183202500	0.00172072	9.07266e-05	LAMC1	HK1_TE:3739;HK1_TE:3740;HK1_TE:3741;HK1_TE:3742;HK1_TE:3743;HK1_TE:3744;HK1_TE:3745;HK1_TE:3746;HK1_TE:3747;HK1_TE:3748;HK1_TE:3750	1	11
1	right	182995000	183247500	0.00354321	0.0036095	RP11-548N1.1	HK1_TE:3711;HK1_TE:3712;HK1_TE:3713;HK1_TE:3714	1	4
1	right	183132500	183247500	2.54803e-11	8.8488e-09	RP11-548N1.1	HK1_TE:3725;HK1_TE:3726;HK1_TE:3727	1	3
1	left	183167500	183202500	1.84796e-05	2.00465e-05	LAMC2	HK1_TE:3739;HK1_TE:3740;HK1_TE:3741;HK1_TE:3742;HK1_TE:3743;HK1_TE:3744;HK1_TE:3745;HK1_TE:3746;HK1_TE:3747;HK1_TE:3748;HK1_TE:3750	1	11
1	right	184775000	185130000	4.14731e-07	5.26111e-05	TRMT1L;SWT1;CTA-253N17.1	HK1_TE:3774;HK1_TE:3775	3	2
1	left	185285000	185565000	2.69005e-15	4.82359e-11	IVNS1ABP;GS1-279B7.2	HK1_TE:3799	2	1
1	left	185287500	185612500	2.80551e-06	0.00133372	IVNS1ABP;GS1-279B7.2	HK1_TE:3800;HK1_TE:3801;HK1_TE:3802	2	3
1	left	185287500	185407500	7.55773e-05	7.54171e-05	IVNS1ABP;GS1-279B7.2	HK1_TE:3794;HK1_TE:3795	2	2
1	right	186122500	186157500	3.29206e-09	2.32365e-06	GS1-174L6.4	HK1_TE:3803	1	1
1	left	186375000	186655000	1.62184e-05	1.71666e-05	AL596220.1;OCLM	HK1_TE:3827	2	1
1	right	186577500	186652500	8.7073e-05	9.07266e-05	PTGS2;RP5-973M2.2	HK1_TE:3821;HK1_TE:3822	2	2
1	left	186800000	186962500	1.11575e-11	1.04892e-11	PLA2G4A	HK1_TE:3841;HK1_TE:3842;HK1_TE:3843	1	3
1	left	192672500	192707500	0.000571434	0.00657688	MIR4426	HK1_TE:3870	1	1
1	left	192777500	193082500	1.76179e-05	0.000141293	RP3-419C19.3;RP3-419C19.2;RGS2	HK1_TE:3879;HK1_TE:3880;HK1_TE:3881	3	3
1	left	197887500	198437500	0.0034419	0.00375151	LHX9	HK1_TE:3934;HK1_TE:3935;HK1_TE:3936;HK1_TE:3937;HK1_TE:3938;HK1_TE:3939;HK1_TE:3940	1	7
1	left	198127500	198422500	0.00354321	0.0036095	NEK7	HK1_TE:3925;HK1_TE:3926;HK1_TE:3927;HK1_TE:3928;HK1_TE:3929;HK1_TE:3930;HK1_TE:3931;HK1_TE:3932;HK1_TE:3933;HK1_TE:3934;HK1_TE:3935;HK1_TE:3936;HK1_TE:3937;HK1_TE:3938;HK1_TE:3939;HK1_TE:3940	1	16
1	right	198460833	198650833	1.27441e-09	2.27903e-07	RP11-553K8.5;PEBP1P3	HK1_TE:3941;HK1_TE:3942;HK1_TE:3943;HK1_TE:3944	2	4
1	left	198577500	198620000	4.27631e-06	4.44343e-06	RP11-553K8.2	HK1_TE:3950;HK1_TE:3951	1	2
1	right	198577500	198620000	4.27631e-06	4.44343e-06	PTPRC	HK1_TE:3948;HK1_TE:3949	1	2
1	left	198577500	198652500	0.000228491	0.000230896	RP11-553K8.2	HK1_TE:3952;HK1_TE:3953;HK1_TE:3954;HK1_TE:3955;HK1_TE:3956	1	5
1	right	198577500	198652500	0.000228491	0.000230896	PEBP1P3	HK1_TE:3948;HK1_TE:3949	1	2
1	right	199652500	200102500	1.44929e-09	1.22215e-06	AC096633.1;RP11-47A17.2	HK1_TE:3980;HK1_TE:3981;HK1_TE:3982;HK1_TE:3983	2	4
1	right	199830000	199880000	0.00283092	0.00302692	RP11-567B20.2	HK1_TE:3995;HK1_TE:3996;HK1_TE:3997;HK1_TE:3998;HK1_TE:3999;HK1_TE:4000	1	6
1	left	200305000	200345000	4.85931e-05	4.93114e-05	RP11-532L16.1	HK1_TE:4029;HK1_TE:4030;HK1_TE:4031;HK1_TE:4032;HK1_TE:4033;HK1_TE:4034	1	6
1	right	200305000	200345000	4.85931e-05	4.93114e-05	LINC00862	HK1_TE:4023;HK1_TE:4024;HK1_TE:4025;HK1_TE:4026	1	4
1	left	200385000	200450000	6.92731e-05	7.43645e-05	ZNF281	HK1_TE:4038;HK1_TE:4039;HK1_TE:4040;HK1_TE:4041;HK1_TE:4042;HK1_TE:4043	1	6
1	right	200385000	200450000	6.92731e-05	7.43645e-05	RP11-469A15.2	HK1_TE:4035;HK1_TE:4036;HK1_TE:4037	1	3
1	left	200595500	200713500	6.4405e-12	8.09106e-09	KIF14	HK1_TE:4068;HK1_TE:4069;HK1_TE:4070;HK1_TE:4071;HK1_TE:4072;HK1_TE:4073	1	6
1	right	200595500	200713500	6.4405e-12	8.09106e-09	CAMSAP2	HK1_TE:4045;HK1_TE:4046;HK1_TE:4047;HK1_TE:4048;HK1_TE:4049;HK1_TE:4050;HK1_TE:4051	1	7
1	left	200645833	200710833	3.83573e-06	0.000294535	DDX59;RP11-92G12.3	HK1_TE:4068;HK1_TE:4069;HK1_TE:4070;HK1_TE:4071;HK1_TE:4072;HK1_TE:4073	2	6
1	right	200645833	200710833	3.83573e-06	0.000294535	CAMSAP2	HK1_TE:4059;HK1_TE:4060;HK1_TE:4061;HK1_TE:4062;HK1_TE:4063;HK1_TE:4064;HK1_TE:4065;HK1_TE:4066	1	8
1	right	201367500	201407500	3.83573e-06	3.98997e-06	TNNI1;RP11-134G8.2	HK1_TE:4114	2	1
1	left	201402500	201437500	2.86262e-05	0.000973973	TNNI1;RP11-134G8.2	HK1_TE:4115;HK1_TE:4116	2	2
1	left	202315000	202575000	7.24025e-07	6.42337e-07	UBE2T;PPP1R12B	HK1_TE:4173	2	1
1	left	202318333	202428333	0.0178636	0.0177153	UBE2T;PPP1R12B	HK1_TE:4164;HK1_TE:4165;HK1_TE:4166;HK1_TE:4167	2	4
1	left	202450000	202575000	5.94168e-13	5.52714e-13	RP11-175B9.3	HK1_TE:4173	1	1
1	right	202450000	202575000	5.94168e-13	5.52714e-13	RP11-569A11.1	HK1_TE:4166;HK1_TE:4167;HK1_TE:4168;HK1_TE:4169	1	4
1	left	203243214	203301785	1.86018e-12	1.04524e-15	CHIT1;RP11-134P9.3	HK1_TE:4177	2	1
1	right	203243214	203301785	1.86018e-12	1.04524e-15	RNU6-487P	HK1_TE:4176	1	1
1	left	203309166	203455833	7.55773e-05	2.60212e-06	FMOD;RP11-435P24.2	HK1_TE:4178;HK1_TE:4179	2	2
1	right	203309166	203455833	7.55773e-05	2.60212e-06	PRELP;OPTC	HK1_TE:4177	2	1
1	right	203479166	203590833	2.10534e-07	2.20414e-05	ATP2B4	HK1_TE:4180	1	1
1	right	203597500	203767500	7.55773e-05	7.54171e-05	ZC3H11A;ZBED6;RP11-397P13.6	HK1_TE:4190	3	1
1	right	203720833	203765833	9.19196e-06	9.50985e-06	ZC3H11A;ZBED6;RP11-397P13.6	HK1_TE:4200;HK1_TE:4201;HK1_TE:4202;HK1_TE:4203;HK1_TE:4204	3	5
1	left	203787500	203822500	0.00172072	9.07266e-05	RP11-397P13.6	HK1_TE:4205;HK1_TE:4206	1	2
1	left	203835000	204175000	0.00029126	1.81322e-08	SNRPE;KRT8P29	HK1_TE:4232;HK1_TE:4233	2	2
1	right	203835000	204175000	0.00029126	1.81322e-08	KISS1;GOLT1A	HK1_TE:4205;HK1_TE:4206;HK1_TE:4207	2	3
1	left	203853269	204039807	9.68569e-11	9.55702e-11	KRT8P29	HK1_TE:4219;HK1_TE:4220;HK1_TE:4221;HK1_TE:4222;HK1_TE:4223	1	5
1	right	203853269	204039807	9.68569e-11	9.55702e-11	SOX13	HK1_TE:4207;HK1_TE:4208;HK1_TE:4209;HK1_TE:4210;HK1_TE:4211	1	5
1	left	204027500	204072500	1.78631e-05	1.71738e-05	SOX13	HK1_TE:4224	1	1
1	left	204040000	204096250	6.2697e-11	6.6075e-11	SOX13	HK1_TE:4225;HK1_TE:4226;HK1_TE:4227;HK1_TE:4228	1	4
1	right	204040000	204096250	6.2697e-11	6.6075e-11	RP11-74C13.4;RP11-74C13.3	HK1_TE:4219;HK1_TE:4220;HK1_TE:4221;HK1_TE:4222;HK1_TE:4223	2	5
1	left	204135500	204173500	2.47211e-07	2.60004e-07	ETNK2;REN	HK1_TE:4232;HK1_TE:4233	2	2
1	right	204135500	204173500	2.47211e-07	2.60004e-07	KISS1;GOLT1A	HK1_TE:4229;HK1_TE:4230;HK1_TE:4231	2	3
1	left	204387500	204470833	5.00654e-28	2.75481e-22	PPP1R15B	HK1_TE:4258;HK1_TE:4259;HK1_TE:4260	1	3
1	right	204387500	204470833	5.00654e-28	2.75481e-22	PIK3C2B;MDM4	HK1_TE:4242;HK1_TE:4243;HK1_TE:4244;HK1_TE:4245;HK1_TE:4246;HK1_TE:4247;HK1_TE:4248;HK1_TE:4249	2	8
1	right	204399545	204469772	3.68588e-27	3.75404e-27	PIK3C2B	HK1_TE:4245;HK1_TE:4246;HK1_TE:4247;HK1_TE:4248;HK1_TE:4249;HK1_TE:4250;HK1_TE:4251;HK1_TE:4252;HK1_TE:4253	1	9
1	left	205192500	205294166	4.02963e-13	2.7678e-10	DSTYK;TMCC2;RP11-383G10.5	HK1_TE:4277;HK1_TE:4278	3	2
1	right	205365000	205605000	3.22683e-06	0.00366416	ELK4;RP11-6B6.3	HK1_TE:4279	2	1
1	right	205627500	205682500	2.61502e-05	2.58117e-05	AC119673.1	HK1_TE:4288;HK1_TE:4289;HK1_TE:4290	1	3
1	left	206655000	207085000	0.00196638	0.00196099	IKBKE	HK1_TE:4329;HK1_TE:4330;HK1_TE:4331;HK1_TE:4332	1	4
1	right	206655000	207085000	0.00196638	0.00196099	IL24;FAIM3;RP11-564A8.8;RP11-564A8.4	HK1_TE:4305;HK1_TE:4306;HK1_TE:4307	4	3
1	left	206680000	207065000	3.25575e-05	0.000883286	C1orf147;RP11-534L20.5;RASSF5	HK1_TE:4320;HK1_TE:4321;HK1_TE:4322;HK1_TE:4323;HK1_TE:4324;HK1_TE:4325;HK1_TE:4326;HK1_TE:4327;HK1_TE:4328;HK1_TE:4329	3	10
1	right	206680000	207065000	3.25575e-05	0.000883286	IL24;RP11-564A8.8	HK1_TE:4308;HK1_TE:4309;HK1_TE:4310	2	3
1	left	206685000	206885000	0.000131781	0.00662661	C1orf147;RP11-534L20.5;RASSF5	HK1_TE:4315;HK1_TE:4316;HK1_TE:4317	3	3
1	left	206775000	207085000	0.000147027	0.00013487	EIF2D	HK1_TE:4329;HK1_TE:4330;HK1_TE:4331;HK1_TE:4332	1	4
1	right	206775000	207085000	0.000147027	0.00013487	IL24;FAIM3;RP11-564A8.8;RP11-564A8.4	HK1_TE:4312;HK1_TE:4313	4	2
1	left	206772500	206837500	4.03298e-12	1.25564e-09	EIF2D	HK1_TE:4314	1	1
1	left	206807500	206852500	0.000477668	0.0107286	RP11-343H5.6;DYRK3	HK1_TE:4314	2	1
1	left	206807500	206882500	6.92731e-05	7.43645e-05	RP11-343H5.6;DYRK3	HK1_TE:4315;HK1_TE:4316;HK1_TE:4317	2	3
1	left	206985833	207085833	2.84275e-09	2.31256e-07	IL19	HK1_TE:4329;HK1_TE:4330;HK1_TE:4331;HK1_TE:4332	1	4
1	left	207065000	207565000	4.29224e-10	3.00362e-06	IL24;RP11-564A8.8	HK1_TE:4356;HK1_TE:4357;HK1_TE:4358;HK1_TE:4359;HK1_TE:4360;HK1_TE:4361	2	6
1	left	207212500	209562500	2.16465e-09	6.77377e-09	C1orf116;snoU13;YOD1;PFKFB2	HK1_TE:4400;HK1_TE:4401;HK1_TE:4402;HK1_TE:4403;HK1_TE:4404;HK1_TE:4405	4	6
1	left	207202500	207492500	9.87889e-06	9.15597e-06	C1orf116;snoU13	HK1_TE:4351;HK1_TE:4352;HK1_TE:4353;HK1_TE:4354;HK1_TE:4355	2	5
1	left	207205000	207565000	2.06874e-05	0.000236297	C1orf116;snoU13	HK1_TE:4356;HK1_TE:4357;HK1_TE:4358;HK1_TE:4359;HK1_TE:4360;HK1_TE:4361	2	6
1	right	207375000	207490000	0.000129497	0.000137358	CD55	HK1_TE:4337;HK1_TE:4338	1	2
1	left	207410000	207565000	3.33902e-05	0.000572385	C4BPAP2;RP11-6J21.2	HK1_TE:4356;HK1_TE:4357;HK1_TE:4358;HK1_TE:4359;HK1_TE:4360;HK1_TE:4361	2	6
1	left	207487500	207564166	1.56416e-07	1.59886e-07	CD55	HK1_TE:4356;HK1_TE:4357;HK1_TE:4358;HK1_TE:4359;HK1_TE:4360;HK1_TE:4361	1	6
1	right	209212500	209607500	2.35211e-07	0.000100568	MIR205HG	HK1_TE:4381;HK1_TE:4382	1	2
1	right	209425000	209535000	5.38407e-05	5.78509e-05	RP11-372M18.2	HK1_TE:4387;HK1_TE:4388;HK1_TE:4389;HK1_TE:4390	1	4
1	left	209542500	209587500	5.13846e-19	3.36984e-13	RP11-372M18.2	HK1_TE:4406;HK1_TE:4407	1	2
1	right	209542500	209587500	5.13846e-19	3.36984e-13	MIR205HG	HK1_TE:4395;HK1_TE:4396;HK1_TE:4397;HK1_TE:4398;HK1_TE:4399;HK1_TE:4400;HK1_TE:4401	1	7
1	left	209552115	209602115	8.89115e-23	7.3098e-23	RP11-372M18.2	HK1_TE:4406;HK1_TE:4407;HK1_TE:4408	1	3
1	right	209552115	209602115	8.89115e-23	7.3098e-23	MIR205HG	HK1_TE:4400;HK1_TE:4401;HK1_TE:4402	1	3
1	right	209585000	209985000	0.000921104	3.05995e-05	IRF6	HK1_TE:4405;HK1_TE:4406;HK1_TE:4407	1	3
1	right	209583000	209827000	6.96721e-19	1.26198e-09	LAMB3	HK1_TE:4404;HK1_TE:4405;HK1_TE:4406;HK1_TE:4407	1	4
1	right	209609166	209739166	2.69181e-06	4.6024e-08	RP1-272L16.1	HK1_TE:4406;HK1_TE:4407;HK1_TE:4408	1	3
1	right	209665000	209735000	0.00445095	3.50901e-05	RP1-272L16.1	HK1_TE:4409	1	1
1	left	209758214	209922500	1.29908e-07	1.48568e-13	CAMK1G	HK1_TE:4424	1	1
1	left	209759166	209869166	1.99973e-07	8.4562e-06	CAMK1G	HK1_TE:4421;HK1_TE:4422;HK1_TE:4423	1	3
1	left	209822500	209922500	1.14535e-05	1.22662e-05	LAMB3	HK1_TE:4424	1	1
1	right	209822500	209922500	1.14535e-05	1.22662e-05	ADORA2BP;TRAF3IP3	HK1_TE:4411;HK1_TE:4412;HK1_TE:4413;HK1_TE:4414;HK1_TE:4415;HK1_TE:4416;HK1_TE:4417;HK1_TE:4418;HK1_TE:4419	2	9
1	left	209959166	210002500	8.37638e-06	3.69574e-08	C1orf74;RP3-434O14.8	HK1_TE:4428;HK1_TE:4429;HK1_TE:4430;HK1_TE:4431;HK1_TE:4432;HK1_TE:4433	2	6
1	left	210410000	210505000	0.000571434	0.00657688	SERTAD4-AS1;SERTAD4	HK1_TE:4438	2	1
1	left	211435000	211495000	0.00109423	1.21291e-06	RCOR3	HK1_TE:4447	1	1
1	left	211555000	211687500	0.000935164	0.000903509	LINC00467	HK1_TE:4450;HK1_TE:4451	1	2
1	right	211687500	211830000	1.88783e-13	1.99449e-16	RP11-354K1.2;AL356310.1;FDPSP8	HK1_TE:4450;HK1_TE:4451	3	2
1	right	211872500	211907500	9.19196e-06	9.50985e-06	RP11-122M14.3	HK1_TE:4452;HK1_TE:4453	1	2
1	left	212002500	212117500	7.51726e-11	1.48427e-08	LPGAT1;RP11-552D8.1	HK1_TE:4458;HK1_TE:4459;HK1_TE:4460;HK1_TE:4461;HK1_TE:4462;HK1_TE:4463	2	6
1	left	212352500	212432500	1.27441e-09	2.27903e-07	RP11-15I11.2	HK1_TE:4471;HK1_TE:4472	1	2
1	left	212352500	212462500	2.86262e-05	3.05713e-05	RP11-15I11.2	HK1_TE:4473	1	1
1	right	212352500	212462500	2.86262e-05	3.05713e-05	PPP2R5A;RP11-384C4.6	HK1_TE:4469	2	1
1	right	212462500	212607500	0.000106711	0.00146843	NENF	HK1_TE:4473	1	1
1	left	212842500	212892500	1.46905e-06	7.43645e-05	RP11-338C15.3	HK1_TE:4483	1	1
1	left	212965000	213032500	0.0462165	0.0499741	NSL1;TATDN3	HK1_TE:4485;HK1_TE:4486	2	2
1	right	212965000	213032500	0.0462165	0.0499741	C1orf227;FLVCR1-AS1;RP11-348H3.4;RP11-348H3.5;FLVCR1	HK1_TE:4484	5	1
1	right	212965000	213187500	0.0439336	0.0105592	ANGEL2	HK1_TE:4484	1	1
1	right	214390000	214440000	0.000805646	0.000868542	SMYD2	HK1_TE:4490;HK1_TE:4491;HK1_TE:4492;HK1_TE:4493;HK1_TE:4494	1	5
1	right	214506500	214763500	1.27911e-09	1.20577e-09	CENPF	HK1_TE:4495	1	1
1	left	214652500	214742500	1.14535e-05	0.000480229	RP11-365D23.4	HK1_TE:4499;HK1_TE:4500;HK1_TE:4501;HK1_TE:4502;HK1_TE:4503;HK1_TE:4504;HK1_TE:4505	1	7
1	left	214695000	214772500	0.0108544	0.000480229	KRT18P12	HK1_TE:4506	1	1
1	left	214722500	214777500	4.85931e-05	0.00199217	PTPN14	HK1_TE:4507	1	1
1	right	214722500	214777500	4.85931e-05	0.00199217	CENPF;ABHD17AP3;RP11-365D23.2	HK1_TE:4498;HK1_TE:4499	3	2
1	left	218520000	218635000	4.00414e-06	0.00168513	RP11-224O19.5;RP11-224O19.2;TGFB2	HK1_TE:4565;HK1_TE:4566;HK1_TE:4567	3	3
1	left	218515000	218835000	6.7944e-08	3.50901e-05	RP11-224O19.5;RP11-224O19.2;TGFB2	HK1_TE:4586;HK1_TE:4587;HK1_TE:4588;HK1_TE:4589;HK1_TE:4590;HK1_TE:4591;HK1_TE:4592;HK1_TE:4593;HK1_TE:4594;HK1_TE:4595	3	10
1	left	219735000	219985000	7.49996e-08	6.12131e-06	RP11-95P13.2	HK1_TE:4615	1	1
1	left	219842500	219982500	2.06874e-05	0.000236297	AC096643.1	HK1_TE:4614;HK1_TE:4615	1	2
1	right	221650000	222637500	0.0289268	0.00087376	RP11-358H9.1;CICP13	HK1_TE:4634;HK1_TE:4635;HK1_TE:4636	2	3
1	right	221645000	221917500	0.0462165	0.0083976	DUSP10	HK1_TE:4634;HK1_TE:4635	1	2
1	left	221917500	222052500	8.7073e-05	9.07266e-05	DUSP10	HK1_TE:4639;HK1_TE:4640;HK1_TE:4641;HK1_TE:4642	1	4
1	left	222002500	222042500	0.00367096	0.00359558	RP11-191N8.2;RNU6-403P	HK1_TE:4639;HK1_TE:4640	2	2
1	right	222755000	222885000	0.00029126	0.000266445	AIDA;RN7SL276P;BROX	HK1_TE:4662;HK1_TE:4663;HK1_TE:4664;HK1_TE:4665	3	4
1	right	223307500	223865833	0.000148601	1.51788e-05	CAPN8;RNU6-1248P	HK1_TE:4674	2	1
1	left	223362500	223402500	0.000366955	0.000394918	RP11-239E10.3	HK1_TE:4676;HK1_TE:4677	1	2
1	left	223896250	223960000	3.49089e-08	8.28815e-11	CAPN2	HK1_TE:4704;HK1_TE:4705;HK1_TE:4706	1	3
1	left	223888333	224241666	3.1487e-12	6.12131e-06	RNU6-1248P;CAPN2	HK1_TE:4716;HK1_TE:4717;HK1_TE:4718;HK1_TE:4719	2	4
1	left	223895000	224075000	0.000353174	6.12131e-06	CAPN2	HK1_TE:4714	1	1
1	right	223987500	224487500	2.49725e-05	2.88818e-05	RP11-365O16.5;RNU6-1008P	HK1_TE:4707;HK1_TE:4708;HK1_TE:4709;HK1_TE:4710	2	4
1	left	224032500	224077500	0.000571434	3.14579e-05	TP53BP2;PHBP11	HK1_TE:4714	2	1
1	right	224305000	224545000	2.86952e-05	2.989e-08	CNIH4	HK1_TE:4721	1	1
1	right	224302500	224372500	0.000106518	0.000107722	RP11-365O16.1;DEGS1;SNORA72	HK1_TE:4720;HK1_TE:4721	3	2
1	right	225637500	226112500	2.61502e-05	7.09813e-07	LEFTY1;RP4-559A3.7;PYCR2;RP4-559A3.6	HK1_TE:4750;HK1_TE:4751;HK1_TE:4752;HK1_TE:4753;HK1_TE:4754;HK1_TE:4755;HK1_TE:4756;HK1_TE:4757;HK1_TE:4758;HK1_TE:4759;HK1_TE:4760;HK1_TE:4761;HK1_TE:4762	4	13
1	right	225665000	226035000	1.41636e-07	1.22037e-07	RP11-285F7.2	HK1_TE:4759;HK1_TE:4760;HK1_TE:4761;HK1_TE:4762	1	4
1	right	225663750	225962500	6.88926e-08	6.46816e-08	SRP9	HK1_TE:4759;HK1_TE:4760;HK1_TE:4761;HK1_TE:4762	1	4
1	right	225795000	225840000	0.000966918	0.000973973	ENAH	HK1_TE:4764;HK1_TE:4765;HK1_TE:4766;HK1_TE:4767	1	4
1	right	225887500	225962500	8.7073e-05	9.07266e-05	SRP9	HK1_TE:4769;HK1_TE:4770;HK1_TE:4771	1	3
1	left	225967500	226112500	2.10534e-07	1.25564e-09	SRP9	HK1_TE:4780;HK1_TE:4781;HK1_TE:4782	1	3
1	left	226065500	226113500	0.00203694	0.00199217	TMEM63A	HK1_TE:4780;HK1_TE:4781;HK1_TE:4782	1	3
1	right	226065500	226113500	0.00203694	0.00199217	LEFTY1;RP4-559A3.7;PYCR2;RP4-559A3.6	HK1_TE:4776;HK1_TE:4777;HK1_TE:4778	4	3
[truncated: 4,935 more rows]

## Sheet: Static_TE
chr1	gene_anchor_position	centroid1	centroid2	fdrBL	fdrDonut	genes	enhancers	number_genes	number_enhancers
22	left	17563055	17645833	9.01338e-21	9.43156e-26	AC006946.16;AC006946.17;IL17RA;AC006946.12	HK1_TE:51059	4	1
22	left	18049375	18117500	2.21596e-10	2.07257e-10	AC004019.18;SLC25A18	HK1_TE:51065;HK1_TE:51066;HK1_TE:51067;HK1_TE:51068	2	4
22	right	18049375	18117500	2.21596e-10	2.07257e-10	ATP6V1E1;BCL2L13;snoU13	HK1_TE:51062;HK1_TE:51063;HK1_TE:51064	3	3
22	left	18050833	18189166	0.000243111	0.00346865	AC004019.18;SLC25A18	HK1_TE:51069;HK1_TE:51070	2	2
22	left	18117500	18187500	7.11435e-10	7.31423e-10	ATP6V1E1;BCL2L13;snoU13	HK1_TE:51069;HK1_TE:51070	3	2
22	left	18470833	18507500	0.00101072	0.00101332	MIR648;XXbac-B476C20.14	HK1_TE:51086;HK1_TE:51087	2	2
22	right	18470833	18507500	0.00101072	0.00101332	MICAL3;RHEBP3;XXbac-B476C20.17	HK1_TE:51080;HK1_TE:51081;HK1_TE:51082;HK1_TE:51083;HK1_TE:51084;HK1_TE:51085	3	6
22	right	19166250	19278750	1.7305e-16	1.89067e-16	CLTCL1	HK1_TE:51101;HK1_TE:51102;HK1_TE:51103;HK1_TE:51104	1	4
22	right	19162500	19467500	3.03541e-14	6.62628e-12	UFD1L;CDC45	HK1_TE:51101;HK1_TE:51102;HK1_TE:51103;HK1_TE:51104	2	4
22	left	19745000	19842500	0.00408224	0.00436587	TBX1	HK1_TE:51112;HK1_TE:51117	1	2
22	right	19745000	19842500	0.00408224	0.00436587	GNB1L;C22orf29	HK1_TE:51108;HK1_TE:51109	2	2
22	left	19792500	19840000	3.3007e-13	3.39149e-13	AC000089.3	HK1_TE:51112	1	1
22	right	19792500	19840000	3.3007e-13	3.39149e-13	GNB1L;C22orf29	HK1_TE:51110;HK1_TE:51111	2	2
22	left	19792500	19867500	7.02389e-07	5.78822e-05	AC000089.3	HK1_TE:51113;HK1_TE:51114;HK1_TE:51115;HK1_TE:51116;HK1_TE:51117	1	5
22	right	19792500	19867500	7.02389e-07	5.78822e-05	AC000078.5	HK1_TE:51110;HK1_TE:51111	1	2
22	left	19960555	20007500	8.19966e-25	8.22585e-25	MIR4761	HK1_TE:51119;HK1_TE:51120;HK1_TE:51121	1	3
22	left	20009166	20052500	0.00128431	0.00123541	ARVCF;TANGO2;MIR185	HK1_TE:51122;HK1_TE:51123	3	2
22	right	20009166	20052500	0.00128431	0.00123541	AC006547.13;AC006547.15	HK1_TE:51119;HK1_TE:51120;HK1_TE:51121	2	3
22	left	20850000	20887500	8.53371e-07	8.23231e-07	KLHL22;Y_RNA;RN7SL812P;KRT18P5;AC007731.1;MED15	HK1_TE:51140;HK1_TE:51141;HK1_TE:51142;HK1_TE:51143	6	4
22	right	20850000	20887500	8.53371e-07	8.23231e-07	AC007050.17	HK1_TE:51135	1	1
22	left	20862500	22012500	0.00444877	0.000289725	KLHL22;MED15	HK1_TE:51180;HK1_TE:51181;HK1_TE:51182	2	3
22	right	20862500	22012500	0.00444877	0.000289725	PPIL2;MIR301B;MIR130B;KB-1440D3.13	HK1_TE:51135;HK1_TE:51136;HK1_TE:51137;HK1_TE:51138;HK1_TE:51139;HK1_TE:51140	4	6
22	left	20868333	20922500	1.30043e-15	1.23787e-15	AC007050.17	HK1_TE:51144;HK1_TE:51145	1	2
22	right	20922500	21057500	0.000259826	9.41608e-06	POM121L4P;BCRP5;TMEM191A	HK1_TE:51144;HK1_TE:51145	3	2
22	right	20922500	21015000	0.00147931	0.00153994	SMPD4P1;SLC9A3P2;AC007050.1;ABHD17AP4	HK1_TE:51144;HK1_TE:51145	4	2
22	right	20925000	21135000	0.000682537	0.000656007	SERPIND1	HK1_TE:51144;HK1_TE:51145	1	2
22	left	20955000	21055000	1.83336e-06	1.65136e-06	AC007050.18	HK1_TE:51148;HK1_TE:51149	1	2
22	left	21212500	21272500	0.000167562	0.000169935	PI4KA;SNAP29	HK1_TE:51153;HK1_TE:51154;HK1_TE:51155;HK1_TE:51156;HK1_TE:51157;HK1_TE:51158	2	6
22	right	21267500	21310833	7.3343e-38	1.33743e-37	RN7SL389P;XXbac-B135H6.15;AIFM3	HK1_TE:51153;HK1_TE:51154;HK1_TE:51155;HK1_TE:51156;HK1_TE:51157;HK1_TE:51158	3	6
22	right	21272500	21362500	0.00507807	0.00505099	THAP7;THAP7-AS1;TUBA3FP;AC002472.1;P2RX6	HK1_TE:51153;HK1_TE:51154;HK1_TE:51155;HK1_TE:51156;HK1_TE:51157;HK1_TE:51158	5	6
22	left	22067500	41632500	3.23896e-10	2.76584e-10	RN7SL280P	HK1_TE:51667	1	1
22	right	22067500	41632500	3.23896e-10	2.76584e-10	CHADL	HK1_TE:51184;HK1_TE:51185	1	2
22	left	22085000	38665000	0	1.6133e-21	YPEL1;RN7SL280P	HK1_TE:51549	2	1
22	left	22085833	38774166	1.3705e-15	3.59061e-15	YPEL1;RN7SL280P	HK1_TE:51563	2	1
22	left	23521071	23626785	1.78507e-29	5.75544e-35	BCR;BCRP8	HK1_TE:51209;HK1_TE:51210;HK1_TE:51211	2	3
22	left	23524166	23574166	2.74793e-11	1.61027e-08	BCR;BCRP8	HK1_TE:51203;HK1_TE:51204;HK1_TE:51205	2	3
22	left	24115500	24192500	2.92489e-15	5.30342e-19	C22orf15;CHCHD10;MMP11;AP000349.1;SMARCB1	HK1_TE:51216	5	1
[truncated: 6,438 more rows]

## Sheet: Gained_TE
chr1	gene_anchor_position	centroid1	centroid2	fdrBL	fdrDonut	genes	enhancers	number_genes	number_enhancers
[truncated: 5,755 more rows]
